# Supplementary material for: Multi-omic Analysis of Familial Adenomatous Polyposis Reveals Molecular Pathways and Polyclonal Spreading Associated with Early Tumorigenesis
Source: Research Square preprint supplement (doi:10.21203/rs.3.rs-515393/v1), 2021-05-19
Supplement: Supplementary file 2 [file 2b53983f60bda34bfd7c1476.xlsx]

## Sheet: Sheet 1
SampleName
