# Supplementary material for: Multi-omic Analysis of Familial Adenomatous Polyposis Reveals Molecular Pathways and Polyclonal Spreading Associated with Early Tumorigenesis
Source: Research Square preprint supplement (doi:10.21203/rs.3.rs-515393/v1), 2021-05-19
Supplement: Supplementary file 5 [file Supplemental Data 5.xlsx]

## Sheet: List_MB
Glmer_status	MZ	Estimate	Std.Error	zvalue	Pr(>|z|)		Glmer_Anova	Anova_model00	npar	AIC	BIC	logLik	deviance	Anova_model.01	npar	AIC	BIC	logLik	deviance	Chisq	Df	Pr(>Chisq)	Significant status considered	RT	Mode	Adduct	Total_Score	Metabolite	HMDB	KEGG	MSI_level
Single_Model	103.04	-2.77725	0.977812	-2.84027	0.0045076		Anova	model.00	4	40.544	46.649	-16.272	32.544	model.01	5	37.004	44.635	-13.502	27.004	5.5401	1	0.01859	sig	5.4	nHILIC	[M-H]-	0.830985	C4:1 FA (Hydroxyisobutyric acid)	HMDB0000008	C05984	2
Single_Model	227.114	-1.26008	0.60469	-2.08385	0.0371738		Anova	model.00	4	40.544	46.649	-16.272	32.544	model.01	5	35.524	43.156	-12.762	25.524	7.0198	1	0.008061	sig	11.9	pHILIC	[M+H]+	0.837314	L-Carnosine	HMDB0000033	C00386	1
Single_Model	136.062	1.69494	0.692817	2.44645	0.0144272		Anova	model.00	4	40.544	46.649	-16.272	32.544	model.01	5	34.126	41.758	-12.063	24.126	8.4174	1	0.003716	sig	2.3	pHILIC	[M+H]+	0.85219	Adenine	HMDB0000034	C00147	1
Single_Model	129.066	-3.53067	1.38544	-2.54842	0.0108212		Anova	model.00	4	40.544	46.649	-16.2718	32.544	model.01	5	29.065	36.697	-9.5326	19.065	13.479	1	0.0002413	sig	9.5	pHILIC	[M+H]+		Dihydrothymine	HMDB0000079	C00906	1
Single_Model	252.109	0.998786	0.0166611	59.9473	0		Anova	model.00	4	40.544	46.649	-16.272	32.544	model.01	5	37.852	45.484	-13.926	27.852	4.6917	1	0.03031	sig	1.8	pHILIC	[M+H]+	0.760343	2'-Deoxyadenosine	HMDB0000101	C00559	2
Single_Model	215.033	-2.39752	0.909801	-2.63521	0.00840854		Anova	model.00	4	40.544	46.649	-16.272	32.544	model.01	5	32.346	39.978	-11.173	22.346	10.197	1	0.001406	sig	6.8	nHILIC	[M+Cl]-		D-Glucose	HMDB0000122	C00221	1
Single_Model	193.035	-1.52648	0.577867	-2.64158	0.00825214		Anova	model.00	4	40.544	46.649	-16.272	32.544	model.01	5	33.461	41.093	-11.73	23.461	9.0828	1	0.00258	sig	10.2	nHILIC	[M-H]-	0.724393	D-Glucuronic acid	HMDB0000127	C00191	1
Single_Model	105.019	-3.68971	1.36186	-2.70932	0.00674205		Anova	model.00	4	40.544	46.649	-16.272	32.544	model.01	5	32.724	40.355	-11.362	22.724	9.82	1	0.001726	sig	9.2	nHILIC	[M-H]-	0.817379	Glyceric acid	HMDB0000139	C00258	2
Single_Model	220.083	1.20409	0.52528	2.29228	0.0218892		Anova	model.00	4	40.544	46.649	-16.272	32.544	model.01	5	30.18	37.811	-10.09	20.18	12.364	1	0.0004377	sig	6.8	nHILIC	[M-H]-		N-Acetylgalactosamine	HMDB0000212	C01074	3
Single_Model	283.068	2.19337	1.0407	2.1076	0.0350657		Anova	model.00	4	40.544	46.649	-16.272	32.544	model.01	5	36.146	43.778	-13.073	26.146	6.3973	1	0.01143	sig	8.2	nHILIC	[M-H]-	0.776074	Xanthosine	HMDB0000299	C01762	2
Single_Model	111.02	36.6025	0.00340626	10745.7	0		Anova	model.00	4	40.544	46.649	-16.2718	32.544	model.01	5	27.789	35.421	-8.8944	17.789	14.755	1	0.0001224	sig	1.6	nHILIC	[M-H]-	0.822996	Uracil	HMDB0000300	C00106	2
Single_Model	85.0295	-7.04076	0.00925392	-760.84	0		Anova	model.00	4	40.544	46.649	-16.272	32.544	model.01	5	35.373	43.004	-12.686	25.373	7.1711	1	0.007409	sig	2.3	nHILIC	[M-H]-		Gamma-Butyrolactone	HMDB0000549	C01770	3
Single_Model	487.213	-2.08463	0.74668	-2.79186	0.00524053		Anova	model.00	4	40.544	46.649	-16.272	32.544	model.01	5	33.786	41.418	-11.893	23.786	8.7578	1	0.003083	sig	17.3	pHILIC	[M+H]+	0.85142	Glucosylgalactosyl hydroxylysine	HMDB0000585	NA	1
Single_Model	325.16	-3.6167	1.33966	-2.69971	0.00693991		Anova	model.00	4	40.544	46.649	-16.2718	32.544	model.01	5	28.577	36.209	-9.2886	18.577	13.966	1	0.0001861	sig	17.2	pHILIC	[M+H]+	0.846064	Galactosylhydroxylysine	HMDB0000600	C05547	1
Single_Model	279.232	2.97465	1.3104	2.27003	0.0232057		Anova	model.00	4	40.544	46.649	-16.272	32.544	model.01	5	36.24	43.871	-13.12	26.24	6.3041	1	0.01205	sig	11.7	nRPLC	[M-H]-	0.763545	C18:2 FA (Linoleic acid)	HMDB0000673	C01595	2
Single_Model	212.002	-1.6186	0.0108914	-148.613	0		Anova	model.00	4	40.544	46.649	-16.272	32.544	model.01	5	34.549	42.181	-12.274	24.549	7.9948	1	0.004691	sig	3.4	nHILIC	[M-H]-	0.710855	Indoxyl sulfate	HMDB0000682	NA	2
Single_Model	279.098	-3.36219	0.0240187	-139.982	0		Anova	model.00	4	40.544	46.649	-16.272	32.544	model.01	5	37.22	44.851	-13.61	27.22	5.324	1	0.02103	sig	2.7	nRPLC	[M-H]-		Aspartylphenylalanine	HMDB0000706	NA	3
Single_Model	414.3	-0.937408	0.431075	-2.17458	0.0296612		Anova	model.00	4	40.544	46.649	-16.272	32.544	model.01	5	36.771	44.403	-13.385	26.771	5.7729	1	0.01627	sig	5.2	pHILIC	[M+H-2H2O]+	0.708677	Glycoursodeoxycholic acid	HMDB0000708	NA	2
Single_Model	178.051	-1.80037	0.739392	-2.43493	0.0148945		Anova	model.00	4	40.544	46.649	-16.272	32.544	model.01	5	35.385	43.017	-12.693	25.385	7.1585	1	0.007461	sig	5.1	nHILIC	[M-H]-	0.825407	Hippuric acid	HMDB0000714	C01586	1
Single_Model	181.051	-2.04522	1.02694	-1.99156	0.046419		Anova	model.00	4	40.544	46.649	-16.272	32.544	model.01	5	35.8	43.432	-12.9	25.8	6.7439	1	0.009407	sig	6.3	nHILIC	[M-H]-		Hydroxyphenyllactic acid	HMDB0000755	C03672	1
Single_Model	260.185	-1.50761	0.655937	-2.29841	0.0215384		Anova	model.00	4	40.544	46.649	-16.272	32.544	model.01	5	35.221	42.853	-12.611	25.221	7.3223	1	0.00681	sig	6.2	pHILIC	[M+H]+	0.815385	C6:0 AC (Hexanoylcarnitine)	HMDB0000756	NA	2
Single_Model	375.29	0.736695	0.312795	2.3552	0.0185127		Anova	model.00	4	40.544	46.649	-16.272	32.544	model.01	5	34.833	42.465	-12.417	24.833	7.7103	1	0.005491	sig	11	nRPLC	[M-H]-	0.760258	Lithocholic acid	HMDB0000761	C03990	2
Single_Model	130.05	-8.53171	3.73438	-2.28464	0.0223339		Anova	model.00	4	40.544	46.649	-16.272	32.544	model.01	5	37.98	45.612	-13.99	27.98	4.5636	1	0.03266	sig	9.7	pHILIC	[M+H]+	0.828074	D-Pyroglutamic acid	HMDB0000805	C02237	2
Single_Model	112.087	-1.8943	0.89532	-2.11578	0.0343634		Anova	model.00	4	40.544	46.649	-16.272	32.544	model.01	5	33.605	41.236	-11.802	23.605	8.939	1	0.002792	sig	9.2	pHILIC	[M+H]+	0.82798	Histamine	HMDB0000870	C00388	2
Single_Model	664.116	1.78293	0.00612624	291.031	0		Anova	model.00	4	40.544	46.649	-16.272	32.544	model.01	5	37.395	45.027	-13.697	27.395	5.1486	1	0.02326	sig	10.6	pHILIC	[M+H]+	0.789516	NAD	HMDB0000902	C00003	1
Single_Model	382.1	1.99104	0.755815	2.6343	0.00843107		Anova	model.00	4	40.544	46.649	-16.272	32.544	model.01	5	33.812	41.443	-11.906	23.812	8.732	1	0.003127	sig	10.3	nHILIC	[M-H]-		Succinyladenosine	HMDB0000912	NA	3
Single_Model	383.114	2.61845	1.06198	2.46564	0.013677		Anova	model.00	4	40.544	46.649	-16.272	32.544	model.01	5	33.184	40.816	-11.592	23.184	9.3597	1	0.002218	sig	9.1	nHILIC	[M-H]-	0.751085	S-Adenosyl-homocysteine	HMDB0000939	C00021	2
Single_Model	569.313	-1.54661	0.713348	-2.1681	0.0301513		Anova	model.00	4	40.544	46.649	-16.272	32.544	model.01	5	37.857	45.489	-13.929	27.857	4.6862	1	0.03041	sig	6.2	pRPLC	[M+H]+		Protoporphyrinogen IX	HMDB0001097	C01079	3
Single_Model	189.088	2.17608	0.808308	2.69214	0.00709942		Anova	model.00	4	40.544	46.649	-16.272	32.544	model.01	5	36.865	44.497	-13.433	26.865	5.6785	1	0.01717	sig	9.1	nHILIC	[M+H]+		Diaminopimelic acid	HMDB0001370	C00666	2
Single_Model	489.115	5.67091	0.0339273	167.149	0		Anova	model.00	4	40.544	46.649	-16.2718	32.544	model.01	5	26.597	34.229	-8.2987	16.597	15.946	1	6.516e-05	sig	11.9	pHILIC	[M+H]+	0.820886	CDP-choline	HMDB0001413	C00307	2
Single_Model	458.178	0.586086	0.0140099	41.8338	0		Anova	model.00	4	40.544	46.649	-16.272	32.544	model.01	5	36.993	44.624	-13.496	26.993	5.5511	1	0.01847	sig	7.1	pRPLC	[M+H]+		5,10-Methylene-THF	HMDB0001533	C00143	3
Single_Model	327.232	2.86583	1.29103	2.21981	0.026432		Anova	model.00	4	40.544	46.649	-16.272	32.544	model.01	5	32.581	40.212	-11.29	22.581	9.963	1	0.001597	sig	11.7	nRPLC	[M-H]-	0.809893	C22:6 FA (Docosahexaenoic acid)	HMDB0002183	C06429	2
Single_Model	331.264	2.82435	1.14435	2.46809	0.0135835		Anova	model.00	4	40.544	46.649	-16.272	32.544	model.01	5	33.559	41.191	-11.78	23.559	8.9846	1	0.002723	sig	12.8	nRPLC	[M-H]-	0.82157	C22:4 FA (Docosatetraenoic acid)	HMDB0002226	C16527	2
Single_Model	122.025	1.90401	0.658747	2.89034	0.00384821		Anova	model.00	4	40.544	46.649	-16.272	32.544	model.01	5	31.069	38.701	-10.534	21.069	11.475	1	0.0007055	sig	5.6	nHILIC	[M-H]-	0.733707	Picolinic acid	HMDB0002243	C10164	2
Single_Model	237.055	1.88116	0.667159	2.81966	0.00480746		Anova	model.00	4	40.544	46.649	-16.2718	32.544	model.01	5	28.593	36.225	-9.2967	18.593	13.95	1	0.0001877	sig	5.7	nHILIC	[M-H]-		Cystathionine sulfoxide	HMDB0002399	NA	3
Single_Model	191.056	-2.08084	1.01352	-2.05308	0.0400651		Anova	model.00	4	40.544	46.649	-16.2718	32.544	model.01	5	28.279	35.911	-9.1397	18.279	14.264	1	0.0001589	sig	8.9	nHILIC	[M-H]-	0.802419	Quinic acid	HMDB0003072	C00296	2
Single_Model	353.141	-3.31402	0.00703698	-470.944	0		Anova	model.00	4	40.544	46.649	-16.272	32.544	model.01	5	32.624	40.256	-11.312	22.624	9.9192	1	0.001636	sig	3.2	pRPLC	[M+H]+		Estradiol-17beta 3-sulfate	HMDB0004448	C08357	3
Single_Model	85.066	2.22078	1.02904	2.1581	0.0309197		Anova	model.00	4	40.544	46.649	-16.272	32.544	model.01	5	32.882	40.514	-11.441	22.882	9.6618	1	0.001881	sig	3.2	nHILIC	[M-H]-		Iso-Valeraldehyde	HMDB0006478	C07329	3
Single_Model	146.118	-2.0703	1.00557	-2.05884	0.0395093		Anova	model.00	4	40.544	46.649	-16.2718	32.544	model.01	5	23.73	31.362	-6.8649	13.73	18.814	1	1.441e-05	sig	4.3	pHILIC	[M+H]+	0.683791	3-Dehydroxycarnitine	HMDB0006831	C05543	2
Single_Model	417.241	1.03265	0.388954	2.65494	0.00793227		Anova	model.00	4	40.544	46.649	-16.272	32.544	model.01	5	38.51	46.142	-14.255	28.51	4.0339	1	0.04459	sig	1.2	nHILIC	[M-H]-		CPA(18:1(11Z)/0:0)	HMDB0007005	NA	3
Single_Model	415.225	0.905804	0.458636	1.975	0.0482686		Anova	model.00	4	40.544	46.649	-16.272	32.544	model.01	5	38.173	45.805	-14.087	28.173	4.3703	1	0.03657	sig	1.3	nHILIC	[M-H]-		CPA(18:2(9Z,12Z)/0:0)	HMDB0007007	NA	3
Single_Model	520.338	1.9833	0.908087	2.18404	0.028959		Anova	model.00	4	40.544	46.649	-16.272	32.544	model.01	5	35.452	43.084	-12.726	25.452	7.0915	1	0.007745	sig	10.7	pRPLC	[M+H]+		LysoPC(18:2)	HMDB0010386	C04230	2
Single_Model	548.37	1.32171	0.649023	2.03645	0.0417047		Anova	model.00	4	40.544	46.649	-16.272	32.544	model.01	5	34.123	41.755	-12.062	24.123	8.4205	1	0.00371	sig	11.4	pRPLC	[M+H]+		LysoPC(20:2)	HMDB0010392	C04230	2
Single_Model	452.276	2.19953	0.87165	2.52341	0.0116223		Anova	model.00	4	40.544	46.649	-16.2718	32.544	model.01	5	29.008	36.64	-9.5042	19.008	13.535	1	0.0002341	sig	10.5	pRPLC	[M+H]+		LysoPE(16:1)	HMDB0011474	NA	2
Single_Model	480.307	2.60751	0.019964	130.61	0		Anova	model.00	4	40.544	46.649	-16.272	32.544	model.01	5	32.322	39.954	-11.161	22.322	10.221	1	0.001388	sig	11.1	pRPLC	[M+H]+		LysoPE(18:1)	HMDB0011475	NA	2
Single_Model	504.308	4.26948	0.0100343	425.487	0		Anova	model.00	4	40.544	46.649	-16.272	32.544	model.01	5	34.271	41.902	-12.135	24.271	8.273	1	0.004024	sig	11	pRPLC	[M+H]+		LysoPE(20:3)	HMDB0011484	NA	2
Single_Model	187.006	-2.20329	0.00748025	-294.548	0		Anova	model.00	4	40.544	46.649	-16.272	32.544	model.01	5	33.034	40.666	-11.517	23.034	9.5095	1	0.002044	sig	4.5	nRPLC	[M-H]-		p-Cresol sulfate	HMDB0011635	NA	2
Single_Model	335.074	3.54665	1.57635	2.24992	0.0244543		Anova	model.00	4	40.544	46.649	-16.272	32.544	model.01	5	31.812	39.443	-10.906	21.812	10.732	1	0.001053	sig	10.8	pHILIC	[M+H]+		1-(sn-Glycero-3-phospho)-1D-myo-inositol	HMDB0011649	C01225	3
Single_Model	192.066	2.30682	0.0188515	122.368	0		Anova	model.00	4	40.544	46.649	-16.272	32.544	model.01	5	36.651	44.283	-13.326	26.651	5.8924	1	0.01521	sig	3.9	nRPLC	[M-H]-	0.679	2-Methylhippuric acid	HMDB0011723	C01586	2
Single_Model	151.061	3.14094	1.12143	2.80083	0.00509714		Anova	model.00	4	40.544	46.649	-16.272	32.544	model.01	5	33.168	40.8	-11.584	23.168	9.3756	1	0.002199	sig	1.6	pHILIC	[M+H]+	0.812622	1-Methylhypoxanthine	HMDB0013141	NA	1
Single_Model	309.207	3.17487	1.43248	2.21635	0.0266675		Anova	model.00	4	40.544	46.649	-16.272	32.544	model.01	5	30.462	38.094	-10.231	20.462	12.082	1	0.0005092	sig	9.6	nRPLC	[M-H]-		C18:2,DC FA (Octadecadienedicarboxylic acid)	HMDB0013623	NA	2
Single_Model	255.134	0.68274	0.311733	2.19015	0.0285135		Anova	model.00	4	40.544	46.649	-16.272	32.544	model.01	5	36.367	43.999	-13.183	26.367	6.177	1	0.01294	sig	12.4	pHILIC	[M+H]+		Midodrine	HMDB0014356	C07890	3
Single_Model	494.269	-1.12443	0.526741	-2.13469	0.0327867		Anova	model.00	4	40.544	46.649	-16.272	32.544	model.01	5	34.143	41.774	-12.071	24.143	8.4011	1	0.00375	sig	7.7	pRPLC	[M+H]+	0.682197	Imatinib	HMDB0014757	NA	2
Single_Model	437.234	-1.91125	0.853011	-2.24059	0.0250527		Anova	model.00	4	40.544	46.649	-16.272	32.544	model.01	5	36.673	44.304	-13.336	26.673	5.871	1	0.01539	sig	5.3	pRPLC	[M+H]+		Flurandrenolide	HMDB0014984	NA	3
Single_Model	579.27	-1.77058	0.849502	-2.08426	0.0371368		Anova	model.00	4	40.544	46.649	-16.272	32.544	model.01	5	34.288	41.919	-12.144	24.288	8.256	1	0.004062	sig	0.9	pHILIC	[M+H]+		Deserpidine	HMDB0015221	C06541	3
Single_Model	415.143	10.5121	0.0224766	467.691	0		Anova	model.00	4	40.544	46.649	-16.2718	32.544	model.01	5	20.725	28.357	-5.3625	10.725	21.819	1	2.997e-06	sig	10.5	pHILIC	[M+H]+	0.719865	Flecainide	HMDB0015326	C07001	2
Single_Model	227.114	1.93647	0.917761	2.10999	0.0348594		Anova	model.00	4	40.544	46.649	-16.272	32.544	model.01	5	36.649	44.281	-13.324	26.649	5.895	1	0.01518	sig	10.8	pHILIC	[M+H]+	0.716351	Ala-His	HMDB0028689	NA	2
Single_Model	290.146	-2.88733	1.34161	-2.15214	0.0313861		Anova	model.00	4	40.544	46.649	-16.272	32.544	model.01	5	36.302	43.934	-13.151	26.302	6.2417	1	0.01248	sig	12.8	pHILIC	[M+H]+		Aspartyl-Arginine	HMDB0028747	NA	2
Single_Model	260.089	4.40571	1.94475	2.26544	0.0234857		Anova	model.00	4	40.544	46.649	-16.272	32.544	model.01	5	30.276	37.908	-10.138	20.276	12.267	1	0.000461	sig	11.4	nHILIC	[M-H]-	0.718177	Gln-Asp	HMDB0028793	NA	2
Single_Model	246.109	1.62272	0.521495	3.11166	0.00186037		Anova	model.00	4	40.544	46.649	-16.272	32.544	model.01	5	33.732	41.364	-11.866	23.732	8.8118	1	0.002993	sig	9.2	nHILIC	[M-H]-		Glutaminylthreonine	HMDB0028807	NA	3
Single_Model	237.091	2.80862	1.35809	2.06806	0.0386339		Anova	model.00	4	40.544	46.649	-16.2718	32.544	model.01	5	23.334	30.966	-6.6672	13.334	19.209	1	1.171e-05	sig	5.2	nHILIC	[M-H]-	0.721951	Gly-Tyr	HMDB0028853	NA	2
Single_Model	243.135	-0.998963	0.497258	-2.00894	0.044543		Anova	model.00	4	40.544	46.649	-16.272	32.544	model.01	5	37.749	45.381	-13.874	27.749	4.7946	1	0.02855	sig	5.5	nHILIC	[M-H]-		Hydroxyprolyl-Isoleucine	HMDB0028866	NA	3
Single_Model	241.094	2.35964	0.843911	2.79608	0.00517272		Anova	model.00	4	40.544	46.649	-16.272	32.544	model.01	5	33.173	40.805	-11.587	23.173	9.3702	1	0.002205	sig	10.2	nHILIC	[M-H]-	0.786513	Histidylserine	HMDB0028894	NA	2
Single_Model	261.156	2.3454	0.912994	2.56891	0.0102019		Anova	model.00	4	40.544	46.649	-16.272	32.544	model.01	5	34.549	42.181	-12.274	24.549	7.9946	1	0.004692	sig	14.7	pHILIC	[M+H]+	0.845228	Lys-Asn	HMDB0028946	NA	2
Single_Model	246.146	1.46128	0.636282	2.29659	0.0216424		Anova	model.00	4	40.544	46.649	-16.272	32.544	model.01	5	35.943	43.575	-12.972	25.943	6.6004	1	0.0102	sig	13.3	nHILIC	[M-H]-		Lysyl-Threonine	HMDB0028961	NA	3
Single_Model	310.176	1.57948	0.682688	2.31362	0.0206885		Anova	model.00	4	40.544	46.649	-16.272	32.544	model.01	5	36.094	43.726	-13.047	26.094	6.45	1	0.0111	sig	11.3	pHILIC	[M+H]+		Lysyl-Tyrosine	HMDB0028963	NA	3
Single_Model	295.129	1.21592	0.604378	2.01185	0.0442352		Anova	model.00	4	40.544	46.649	-16.272	32.544	model.01	5	36.106	43.738	-13.053	26.106	6.4379	1	0.01117	sig	8.8	pHILIC	[M+H]+	0.77358	Phe-Glu	HMDB0028994	NA	2
Single_Model	234.145	2.04438	0.860121	2.37685	0.0174612		Anova	model.00	4	40.544	46.649	-16.272	32.544	model.01	5	32.966	40.598	-11.483	22.966	9.5776	1	0.00197	sig	13	pHILIC	[M+H]+	0.793272	Ser-Lys	HMDB0029044	NA	2
Single_Model	207.097	1.78193	0.640203	2.78338	0.00537957		Anova	model.00	4	40.544	46.649	-16.272	32.544	model.01	5	33.815	41.447	-11.908	23.815	8.7284	1	0.003133	sig	9	pHILIC	[M+H]+	0.728641	Ser-Thr	HMDB0029049	NA	2
Single_Model	205.083	2.83325	1.06726	2.6547	0.00793788		Anova	model.00	4	40.544	46.649	-16.272	32.544	model.01	5	33.244	40.876	-11.622	23.244	9.2993	1	0.002292	sig	9	nHILIC	[M-H]-	0.783677	Thr-Ser	HMDB0029070	NA	2
Single_Model	339.207	-1.99563	0.993081	-2.00954	0.0444802		Anova	model.00	4	40.544	46.649	-16.272	32.544	model.01	5	36.416	44.048	-13.208	26.416	6.1277	1	0.01331	sig	10.3	pRPLC	[M+H]+		Aspidospermatine	HMDB0030358	C09041	3
Single_Model	339.089	-2.55441	1.15953	-2.20298	0.0275961		Anova	model.00	4	40.544	46.649	-16.272	32.544	model.01	5	32.511	40.143	-11.255	22.511	10.033	1	0.001538	sig	4.6	nHILIC	[M-H]-		Dihydro-O-methylsterigmatocystin	HMDB0030591	NA	3
Single_Model	767.461	-1.54077	0.744909	-2.0684	0.0386029		Anova	model.00	4	40.544	46.649	-16.272	32.544	model.01	5	35.607	43.239	-12.803	25.607	6.9369	1	0.008444	sig	10.3	pRPLC	[M+H]+		Pitheduloside A	HMDB0031357	NA	3
Single_Model	231.087	-0.970653	0.454352	-2.13634	0.0326514		Anova	model.00	4	40.544	46.649	-16.272	32.544	model.01	5	37.313	44.945	-13.657	27.313	5.2303	1	0.0222	sig	8.2	nHILIC	[M-H]-		Glycerol 1-propanoate diacetate	HMDB0031640	NA	3
Single_Model	109.076	1.23787	0.481865	2.56891	0.0102019		Anova	model.00	4	40.544	46.649	-16.272	32.544	model.01	5	37.741	45.373	-13.87	27.741	4.8029	1	0.02841	sig	7.3	pHILIC	[M+H]+	0.791795	2-Ethylpyrazine	HMDB0031849	NA	2
Single_Model	247.119	1.56865	0.00856938	183.053	0		Anova	model.00	4	40.544	46.649	-16.272	32.544	model.01	5	36.16	43.791	-13.08	26.16	6.384	1	0.01152	sig	3.7	nHILIC	[M-H]-		Prenyl glucoside	HMDB0031876	C09808	3
Single_Model	198.087	1.17122	0.533554	2.19513	0.0281543		Anova	model.00	4	40.544	46.649	-16.272	32.544	model.01	5	35.712	43.344	-12.856	25.712	6.8319	1	0.008954	sig	8.3	pHILIC	[M+H]+	0.850234	N-Acetylhistidine	HMDB0032055	C02997	1
Single_Model	298.101	-2.02425	0.83487	-2.42463	0.0153239		Anova	model.00	4	40.544	46.649	-16.272	32.544	model.01	5	33.515	41.147	-11.758	23.515	9.0287	1	0.002658	sig	11	pHILIC	[M+H]+		L-Menthone 1,2-glycerol ketal	HMDB0032367	NA	3
Single_Model	233.067	-1.3788	0.0268026	-51.4428	0		Anova	model.00	4	40.544	46.649	-16.272	32.544	model.01	5	34.193	41.825	-12.096	24.193	8.3509	1	0.003855	sig	5.6	nHILIC	[M-H]-		1-Isopropyl citrate	HMDB0032438	NA	3
Single_Model	211.039	1.33774	0.525673	2.54481	0.0109337		Anova	model.00	4	40.544	46.649	-16.272	32.544	model.01	5	34.727	42.359	-12.364	24.727	7.8164	1	0.005177	sig	8.7	nHILIC	[M-H]-	0.657605	3-Hydroxyxanthone	HMDB0032997	NA	2
Single_Model	95.0604	-2.65811	1.2504	-2.1258	0.0335199		Anova	model.00	4	40.544	46.649	-16.272	32.544	model.01	5	36.55	44.181	-13.275	26.55	5.994	1	0.01435	sig	10.5	pHILIC	[M+H]+	0.825036	3-Methylpyridazine	HMDB0033112	NA	2
Single_Model	238.05	1.29996	0.519193	2.50381	0.0122865		Anova	model.00	4	40.544	46.649	-16.272	32.544	model.01	5	32.782	40.414	-11.391	22.782	9.7616	1	0.001782	sig	8.6	nHILIC	[M-H]-		Marcanine A	HMDB0033757	NA	3
Single_Model	519.224	2.75596	0.987507	2.79083	0.00525734		Anova	model.00	4	40.544	46.649	-16.272	32.544	model.01	5	36.687	44.318	-13.343	26.687	5.857	1	0.01552	sig	11.7	nRPLC	[M-H]-		Myricanol 5-glucoside	HMDB0036525	NA	3
Single_Model	367.285	-0.819425	0.415383	-1.9727	0.0485298		Anova	model.00	4	40.544	46.649	-16.272	32.544	model.01	5	34.393	42.025	-12.197	24.393	8.1506	1	0.004305	sig	1.3	nHILIC	[M-H]-		Octadecyl fumarate	HMDB0038073	NA	3
Single_Model	202.072	1.26814	0.434663	2.91753	0.00352811		Anova	model.00	4	40.544	46.649	-16.272	32.544	model.01	5	37.193	44.824	-13.596	27.193	5.3511	1	0.02071	sig	8	nHILIC	[M-H]-		1-Isothiocyanato-7-(methylthio)heptane	HMDB0038440	NA	3
Single_Model	293.117	1.36742	0.637839	2.14384	0.0320459		Anova	model.00	4	40.544	46.649	-16.272	32.544	model.01	5	37.36	44.992	-13.68	27.36	5.1835	1	0.0228	sig	11.2	pHILIC	[M+H]+		N-gamma-Glutamyl-S-propylcysteine	HMDB0039096	NA	3
Single_Model	662.101	1.7501	0.00598641	292.346	0		Anova	model.00	4	40.544	46.649	-16.272	32.544	model.01	5	37.12	44.752	-13.56	27.12	5.4233	1	0.01987	sig	1.2	nRPLC	[M-H]-		Fenugreekine	HMDB0039421	NA	3
Single_Model	117.056	-4.02499	2.04409	-1.96909	0.0489431		Anova	model.00	4	40.544	46.649	-16.272	32.544	model.01	5	36.428	44.06	-13.214	26.428	6.1157	1	0.0134	sig	4.1	nHILIC	[M-H]-		alpha-Hydroxyisovaleric acid|beta-Hydroxyisovalerate	HMDB00407|HMDB00754	C20827	2
Single_Model	148.991	-4.90029	2.36635	-2.07083	0.038375		Anova	model.00	4	40.544	46.649	-16.272	32.544	model.01	5	35.312	42.944	-12.656	25.312	7.2316	1	0.007163	sig	6.8	nHILIC	[M-H]-		Thiodiacetic acid	HMDB0042032	NA	3
Single_Model	277.005	-3.84833	1.86774	-2.06042	0.0393581		Anova	model.00	4	40.544	46.649	-16.272	32.544	model.01	5	33.644	41.275	-11.822	23.644	8.9001	1	0.002851	sig	6.2	nHILIC	[M-H]-		Treosulfan	HMDB0042046	NA	3
Single_Model	251.201	1.91694	0.877177	2.18535	0.0288632		Anova	model.00	4	40.544	46.649	-16.272	32.544	model.01	5	33.909	41.541	-11.955	23.909	8.6342	1	0.003299	sig	10.9	nRPLC	[M-H]-		C16:2 FA (Hexadecadienoic acid)	HMDB00477	NA	2
Single_Model	201.026	-2.85646	1.27153	-2.24648	0.024673		Anova	model.00	4	40.544	46.649	-16.2718	32.544	model.01	5	28.844	36.475	-9.4218	18.844	13.7	1	0.0002144	sig	6.1	nHILIC	[M-H]-		5-hydroxy-2-oxo-4-ureido-2,5-dihydro-1H-imidazole-5-carboxylate	HMDB0059663	C12248	3
Single_Model	460.167	-1.19962	0.482684	-2.48531	0.0129438		Anova	model.00	4	40.544	46.649	-16.272	32.544	model.01	5	38.173	45.805	-14.086	28.173	4.3707	1	0.03656	sig	9.2	nHILIC	[M-H]-		3-cis-Hydroxyglipizide	HMDB0060934	NA	3
Single_Model	275.075	1.11502	0.0187747	59.3895	0		Anova	model.00	4	40.544	46.649	-16.272	32.544	model.01	5	33.008	40.639	-11.504	23.008	9.536	1	0.002015	sig	4.1	pHILIC	[M+H]+		modafinil acid	HMDB0061039	NA	3
Single_Model	571.288	0.413008	0.197031	2.09616	0.036068		Anova	model.00	4	40.544	46.649	-16.272	32.544	model.01	5	36.312	43.944	-13.156	26.312	6.2314	1	0.01255	sig	13.2	nRPLC	[M-H]-		LPI(16:0)	HMDB0061695	NA	3
Single_Model	414.299	-1.31111	0.494165	-2.65318	0.00797367		Anova	model.00	4	40.544	46.649	-16.2718	32.544	model.01	5	26.874	34.506	-8.4372	16.874	15.669	1	7.544e-05	sig	9.9	pRPLC	[M+H]+		N-Docosahexaenoyl GABA	HMDB0062332	NA	3
Single_Model	488.235	0.86257	0.421242	2.04768	0.0405912		Anova	model.00	4	40.544	46.649	-16.272	32.544	model.01	5	36.222	43.854	-13.111	26.222	6.3216	1	0.01193	sig	11	pHILIC	[M+H]+		Ac-Ser-Asp-Lys-Pro-OH	HMDB0062552	NA	3
Single_Model	187.097	-2.43275	1.14089	-2.13233	0.03298		Anova	model.00	4	40.544	46.649	-16.272	32.544	model.01	5	36.64	44.271	-13.32	26.64	5.904	1	0.01511	sig	4.5	nRPLC	[M-H]-		C9:0,DC FA (Azelaic acid)	HMDB00784	C08261	2
Single_Model	152.002	3.22978	1.60376	2.01388	0.044022		Anova	model.00	4	40.544	46.649	-16.272	32.544	model.01	5	34.066	41.698	-12.033	24.066	8.4772	1	0.003596	sig	6.2	nHILIC	[M-H]-	0.78659	Cysteine sulfinic acid	HMDB00996	C00606	2
Single_Model	323.022	-0.787272	0.0237803	-33.106	2.43e-240		Anova	model.00	4	40.544	46.649	-16.272	32.544	model.01	5	38.333	45.965	-14.166	28.333	4.2109	1	0.04016	sig	8.4	nHILIC	[M-H]-		{4-[(E)-2-(2,3,5-trihydroxyphenyl)ethenyl]phenyl}oxidanesulfonic acid	HMDB0128516	NA	3
Single_Model	317.032	1.38558	0.601072	2.30518	0.0211565		Anova	model.00	4	40.544	46.649	-16.272	32.544	model.01	5	33.546	41.178	-11.773	23.546	8.9974	1	0.002704	sig	3.5	nRPLC	[M-H]-		{[3-(6,7-dimethoxy-2H-1,3-benzodioxol-5-yl)prop-2-en-1-yl]oxy}sulfonic acid	HMDB0128688	NA	3
Single_Model	293.051	1.85875	0.88992	2.08867	0.0367376		Anova	model.00	4	40.544	46.649	-16.272	32.544	model.01	5	35.724	43.356	-12.862	25.724	6.8198	1	0.009015	sig	3.8	nHILIC	[M-H]-		3,4,5-trihydroxy-6-[(3-methoxy-3-oxopropanoyl)oxy]oxane-2-carboxylic acid	HMDB0130026	NA	3
Single_Model	365.071	0.931047	0.472535	1.97032	0.0488015		Anova	model.00	4	40.544	46.649	-16.272	32.544	model.01	5	36.926	44.558	-13.463	26.926	5.6173	1	0.01778	sig	1.3	nRPLC	[M-H]-		(5,7-dihydroxy-6,8-dimethyl-2-phenyl-3,4-dihydro-2H-1-benzopyran-4-yl)oxidanesulfonic acid	HMDB0130599	NA	3
Single_Model	256.081	1.09692	0.540028	2.03123	0.0422315		Anova	model.00	4	40.544	46.649	-16.272	32.544	model.01	5	35.104	42.736	-12.552	25.104	7.4394	1	0.006381	sig	8.1	pHILIC	[M+H]+		2-{[hydroxy(4-hydroxy-3,5-dimethoxyphenyl)methylidene]amino}acetic acid	HMDB0131458	NA	3
Single_Model	233.056	-0.675213	0.276363	-2.44321	0.0145573		Anova	model.00	4	40.544	46.649	-16.272	32.544	model.01	5	31.405	39.037	-10.703	21.405	11.138	1	0.0008456	sig	5.1	nRPLC	[M-H]-		2-{[hydroxy(5-hydroxy-1H-indol-3-yl)methylidene]amino}acetic acid	HMDB0134939	NA	3
Single_Model	305.248	2.12559	1.00231	2.1207	0.0339474		Anova	model.00	4	40.544	46.649	-16.272	32.544	model.01	5	36.227	43.859	-13.114	26.227	6.3163	1	0.01196	sig	12.2	nRPLC	[M-H]-		C20:3 FA (Eicosatrienoic acid)	HMDB02925	C03242	2
Single_Model	295.227	2.98372	1.38427	2.15545	0.0311269		Anova	model.00	4	40.544	46.649	-16.272	32.544	model.01	5	33.481	41.113	-11.741	23.481	9.0626	1	0.002609	sig	10.6	nRPLC	[M-H]-		C18:2,OH FA (Hydroxy-octadecadienoic acid)	HMDB04702	C14826	2
Single_Model	307.264	3.47637	1.30353	2.66689	0.00765567		Anova	model.00	4	40.544	46.649	-16.2718	32.544	model.01	5	28.735	36.367	-9.3676	18.735	13.809	1	0.0002024	sig	13.1	nRPLC	[M-H]-		C20:2 FA (Eicosadienoic acid)	HMDB05060	C16525	2
Single_Model	329.248	2.3051	1.11282	2.07139	0.038322		Anova	model.00	4	40.544	46.649	-16.272	32.544	model.01	5	35.941	43.573	-12.97	25.941	6.6029	1	0.01018	sig	12.1	nRPLC	[M-H]-		C22:5 FA (Docosapentaenoic acid)	HMDB06528	C16513	2
Single_Model	482.323	1.27458	0.612915	2.07955	0.0375673		Anova	model.00	4	40.544	46.649	-16.272	32.544	model.01	5	35.637	43.269	-12.818	25.637	6.9068	1	0.008587	sig	10.6	pRPLC	[M+H]+	0.764132	LysoPC(15:0)	HMDB10381	C04230	2
Single_Model	293.212	2.25276	0.974497	2.31171	0.0207936		Anova	model.00	4	40.544	46.649	-16.272	32.544	model.01	5	33.938	41.57	-11.969	23.938	8.6053	1	0.003352	sig	10.2	nRPLC	[M-H]-	0.688238	C18:3,OH FA (Hydroxylinolenic acid)	HMDB11108	C16346	2
Single_Model	319.227	4.64287	2.09449	2.2167	0.0266434		Anova	model.00	4	40.544	46.649	-16.272	32.544	model.01	5	22.888	30.52	-6.444	12.888	19.656	1	9.273e-06	sig	10.3	nRPLC	[M-H]-		C20:4,OH FA (HETE)	HMDB11134	C04805	2
Single_Model	438.297	1.95694	0.842166	2.3237	0.0201415		Anova	model.00	4	40.544	46.649	-16.272	32.544	model.01	5	33.038	40.67	-11.519	23.038	9.5052	1	0.002049	sig	11.2	pRPLC	[M+H]+		LysoPE(P-16:0)	HMDB11152	NA	2
Single_Model	261.144	1.29644	0.608189	2.13164	0.0330368		Anova	model.00	4	40.544	46.649	-16.272	32.544	model.01	5	36.982	44.614	-13.491	26.982	5.5617	1	0.01836	sig	2.4	pRPLC	[M+H]+		gamma-glutamyl-L-isoleucine |gamma-glutamyl-L-leucine	HMDB11170|HMDB11171	NA	1
Single_Model	276.119	1.30839	0.528509	2.47562	0.0133006		Anova	model.00	4	40.544	46.649	-16.272	32.544	model.01	5	34.789	42.421	-12.394	24.789	7.7548	1	0.005357	sig	11.4	pHILIC	[M+H]+	0.860905	Gamma-Glutamyl Glutamine	HMDB11738	C05283	1
Single_Model	304.212	-1.20324	0.527466	-2.28117	0.0225386		Anova	model.00	4	40.544	46.649	-16.272	32.544	model.01	5	34.605	42.236	-12.302	24.605	7.9391	1	0.004838	sig	6.6	pHILIC	[M+H]+	0.782069	C8:0,OH AC (Hydroxyoctanoyl carnitine)	HMDB61634	NA	2
Single_Model	393.208	-1.82512	0.77505	-2.35485	0.0185303		Anova	model.00	4	40.544	46.649	-16.272	32.544	model.01	5	36.022	43.654	-13.011	26.022	6.5212	1	0.01066	sig	4.9	pRPLC	[M+H]+	0.77262	(S)-N-(1-Amino-3-methyl-1-oxobutan-2-yl)-1-(5-fluoropentyl)-3-(4-fluorophenyl)-1H-pyrazole-5-carboxamide	METPA0001	C00012	2
Single_Model	284.053	4.02164	0.0282625	142.296	0		Anova	model.00	4	40.544	46.649	-16.2718	32.544	model.01	5	25.159	32.791	-7.5795	15.159	17.385	1	3.053e-05	sig	11.3	pHILIC	[M+H]+		Fosthiazate	NA	NA	3
Single_Model	129.056	-2.87209	0.956876	-3.00153	0.00268627		Anova	model.00	4	40.544	46.649	-16.2718	32.544	model.01	5	28.508	36.14	-9.2542	18.508	14.035	1	0.0001794	sig	3	nRPLC	[M-H]-	0.738892	4-Oxohexanoic acid	HMDB10717	C02122	2
Single_Model	422.268	1.56638	0.697881	2.24448	0.0248015		Anova	model.00	4	40.544	46.649	-16.272	32.544	model.01	5	30.684	38.316	-10.342	20.684	11.859	1	0.0005738	sig	5.7	nHILIC	[M-H]-		PHOSPHONIC ACID 2-DODECANOYLAMINO-HEXYL ESTER PROPYL ESTER	HMDB38568	NA	3
Single_Model	362.221	-1.11879	0.449394	-2.48956	0.0127903		Anova	model.00	4	40.544	46.649	-16.272	32.544	model.01	5	30.7	38.332	-10.35	20.7	11.843	1	0.0005787	sig	10.3	pRPLC	[M+H]+		Prenoxdiazine	NA		3
Single_Model	128.045	-0.795036	0.273626	-2.90555	0.00366605		Anova	model.00	4	40.544	46.649	-16.272	32.544	model.01	5	31.299	38.931	-10.65	21.299	11.245	1	0.0007986	sig	1.2	pHILIC	[M+H]+	0.766148	5-Aminouracil/	NA		2
Single_Model	95.0604	-2.12714	0.968853	-2.19553	0.0281259		Anova	model.00	4	40.544	46.649	-16.272	32.544	model.01	5	32.313	39.945	-11.157	22.313	10.23	1	0.001382	sig	9.2	pHILIC	[M+H]+	0.806169	4-Methylpyrimidine	NA		2
Single_Model	596.268	-1.96523	0.908291	-2.16366	0.0304907		Anova	model.00	4	40.544	46.649	-16.272	32.544	model.01	5	32.538	40.169	-11.269	22.538	10.006	1	0.00156	sig	1.2	pHILIC	[M+H]+		GLPG-0187	NA		3
Single_Model	387.198	2.57783	1.17888	2.18668	0.0287662		Anova	model.00	4	40.544	46.649	-16.272	32.544	model.01	5	33.124	40.755	-11.562	23.124	9.42	1	0.002146	sig	13.5	pHILIC	[M+H]+		(5S)-5-(3-AMINOPROPYL)-3-(2,5-DIFLUOROPHENYL)-N-ETHYL-5-PHENYL-4,5-DIHYDRO-1H-PYRAZOLE-1-CARBOXAMIDE	NA		3
Single_Model	339.195	-0.670272	0.310343	-2.15978	0.0307897		Anova	model.00	4	40.544	46.649	-16.272	32.544	model.01	5	33.948	41.58	-11.974	23.948	8.5953	1	0.00337	sig	1.4	pHILIC	[M+H]+		Cismethrin	NA		3
Single_Model	428.261	-0.672161	0.251342	-2.67429	0.00748876		Anova	model.00	4	40.544	46.649	-16.272	32.544	model.01	5	34.043	41.674	-12.021	24.043	8.5011	1	0.003549	sig	10.3	pRPLC	[M+H]+		(2S,3R)-2-[[4-(Tert-butylcarbamoyl)piperazine-1-carbonyl]amino]-6-(diaminomethylideneamino)-3-formylhexanoic acid	NA		3
Single_Model	316.15	0.80784	0.392009	2.06077	0.039325		Anova	model.00	4	40.544	46.649	-16.272	32.544	model.01	5	34.641	42.273	-12.32	24.641	7.9027	1	0.004936	sig	11.7	pHILIC	[M+H]+		Trofinetide	NA		3
Single_Model	340.177	-1.1018	0.53235	-2.0697	0.0384808		Anova	model.00	4	40.544	46.649	-16.272	32.544	model.01	5	35.096	42.728	-12.548	25.096	7.4476	1	0.006352	sig	6.6	pRPLC	[M+H]+		2,4-Diamino-6-[N-(2',5'-Dimethoxybenzyl)-N-Methylamino]Quinazoline	NA		3
Single_Model	373.171	1.45153	0.678826	2.1383	0.0324925		Anova	model.00	4	40.544	46.649	-16.272	32.544	model.01	5	35.119	42.751	-12.559	25.119	7.4248	1	0.006433	sig	11.1	pHILIC	[M+H]+		1,1,1-TRIFLUORO-3-((N-ACETYL)-L-LEUCYLAMIDO)-4-PHENYL-BUTAN-2-ONE(N-ACETYL-L-LEUCYL-L-PHENYLALANYL TRIFLUOROMETHYL KETONE)	NA		3
Single_Model	398.116	-1.80487	0.0265572	-67.9616	0		Anova	model.00	4	40.544	46.649	-16.272	32.544	model.01	5	35.588	43.22	-12.794	25.588	6.9555	1	0.008356	sig	3.3	pRPLC	[M+H]+		Rivoglitazone	NA		3
Single_Model	370.052	2.0981	0.0136746	153.43	0		Anova	model.00	4	40.544	46.649	-16.272	32.544	model.01	5	36.332	43.964	-13.166	26.332	6.2117	1	0.01269	sig	10.6	pHILIC	[M+H]+		N-({[4-(AMINOSULFONYL)PHENYL]AMINO}CARBONYL)-4-METHYLBENZENESULFONAMIDE	NA		3
Single_Model	349.182	-1.64254	0.734135	-2.23738	0.0252616		Anova	model.00	4	40.544	46.649	-16.272	32.544	model.01	5	36.72	44.352	-13.36	26.72	5.8236	1	0.01581	sig	4.5	pRPLC	[M+H]+		Efinaconazole	NA		3
Single_Model	357.219	-0.509736	0.258422	-1.97249	0.0485533		Anova	model.00	4	40.544	46.649	-16.272	32.544	model.01	5	36.781	44.413	-13.391	26.781	5.7623	1	0.01637	sig	1.6	pHILIC	[M+H]+		3-Methyl-5-(7-{4-[(4R)-4-methyl-4,5-dihydro-1,3-oxazol-2-yl]phenoxy}heptyl)-1,2-oxazole	NA		3
Single_Model	361.233	1.02485	0.42356	2.41962	0.0155367		Anova	model.00	4	40.544	46.649	-16.272	32.544	model.01	5	37.557	45.189	-13.779	27.557	4.9863	1	0.02555	sig	10.2	pRPLC	[M+H]+		4-[[(2S)-2-[[(2S)-3-Carboxy-2-hydroxypropanoyl]amino]-4-methylpentanoyl]amino]butyl-(diaminomethylidene)azanium	NA		3
Single_Model	120.102	1.36126	0.475599	2.8622	0.00420713		Anova	model.00	4	40.544	46.649	-16.272	32.544	model.01	5	38.07	45.702	-14.035	28.07	4.4735	1	0.03442	sig	7.4	pHILIC	[M+H]+		Ammonium isovalerate	NA		3
Single_Model	330.861	-2.02381	0.679435	-2.97867	0.00289501		Anova	model.00	4	40.544	46.649	-16.272	32.544	model.01	5	31.684	39.316	-10.842	21.684	10.86	1	0.0009829	sig	6	nHILIC	[M-H]-		3,8-DIBROMO-7-HYDROXY-4-METHYL-2H-CHROMEN-2-ONE	NA		3
Single_Model	324.036	1.27205	0.602484	2.11134	0.0347434		Anova	model.00	4	40.544	46.649	-16.272	32.544	model.01	5	31.693	39.325	-10.847	21.693	10.85	1	0.0009878	sig	11	nHILIC	[M-H]-		Flumetsulam	NA		3
Single_Model	336.06	2.17133	0.960244	2.26123	0.0237451		Anova	model.00	4	40.544	46.649	-16.272	32.544	model.01	5	32.563	40.195	-11.281	22.563	9.9807	1	0.001582	sig	8.4	nHILIC	[M-H]-		5-methylcytidine 5'-monophosphate	NA		3
Single_Model	313.119	-1.32158	0.672267	-1.96586	0.0493153		Anova	model.00	4	40.544	46.649	-16.272	32.544	model.01	5	33.618	41.25	-11.809	23.618	8.9257	1	0.002812	sig	4.1	nHILIC	[M-H]-		2-HYDROXY-5-{[(1E)-2-PHENYLETHYLIDENE]AMINO}-L-TYROSINE	NA		3
Single_Model	321.03	1.22713	0.625738	1.96109	0.0498686		Anova	model.00	4	40.544	46.649	-16.272	32.544	model.01	5	33.733	41.365	-11.867	23.733	8.8105	1	0.002995	sig	3.5	nRPLC	[M-H]-		Sodium sulfate decahydrate	NA		3
Single_Model	112.937	1.41266	0.607973	2.32356	0.0201492		Anova	model.00	4	40.544	46.649	-16.272	32.544	model.01	5	33.811	41.443	-11.906	23.811	8.7322	1	0.003126	sig	11.4	nHILIC	[M-H]-	0.818181	Thiosulfic acid	HMDB00257	C05529	1
Single_Model	516.273	0.862406	0.398565	2.16378	0.0304815		Anova	model.00	4	40.544	46.649	-16.272	32.544	model.01	5	34.378	42.01	-12.189	24.378	8.1658	1	0.004269	sig	6	nHILIC	[M-H]-		Paspalitrem B	NA		3
Single_Model	190.051	1.10894	0.388867	2.85171	0.00434853		Anova	model.00	4	40.544	46.649	-16.272	32.544	model.01	5	35.139	42.771	-12.57	25.139	7.4042	1	0.006507	sig	3.9	nRPLC	[M-H]-	0.746764	(2-oxo-2,3-dihydro-1H-indol-3-yl)acetic acid/5-Hydroxyindoleacetic acid	HMDB35514/HMDB00763	C05635	2
Single_Model	260.053	-1.39348	0.547192	-2.5466	0.0108778		Anova	model.00	4	40.544	46.649	-16.272	32.544	model.01	5	35.217	42.849	-12.609	25.217	7.3265	1	0.006794	sig	3.1	nRPLC	[M-H]-		2-Deoxy-2-Amino Glucitol-6-Phosphate	NA	C06605	3
Single_Model	420.036	-0.983114	0.483982	-2.0313	0.0422241		Anova	model.00	4	40.544	46.649	-16.272	32.544	model.01	5	36.401	44.033	-13.201	26.401	6.1422	1	0.0132	sig	0.9	nRPLC	[M-H]-		Flumetralin	NA	C18849	3
Single_Model	218.103	0.555106	0.728878	0.76159	0.446305		Anova	model.00	4	40.544	46.649	-16.272	32.544	model.01	5	41.888	49.52	-15.944	31.888	0.6556	1	0.4181	nsig	X218.1033_6.8	nHILIC	[M-H]-	0.823024	Pantothenic acid (Vitamin B5)	HMDB00210	C00864	1
Single_Model	124.991	-2.18241	1.2722	-1.71546	0.0862605		Anova	model.00	4	40.544	46.649	-16.272	32.544	model.01	5	36.249	43.881	-13.125	26.249	6.2945	1	0.01211	nsig	X124.9914_6.3	nHILIC	[M-H]-	0.761099	2-Hydroxyethanesulfonate	HMDB03903	C05123	1
Single_Model	170.092	0.026413	0.453486	0.0582442	0.953554		Anova	model.00	4	40.544	46.649	-16.272	32.544	model.01	5	42.54	50.172	-16.27	32.54	0.0034	1	0.9535	nsig	X170.0923_9.1	pHILIC	[M+H]+	0.812422	1-Methylhistidine	HMDB0000001	C01152	1
Single_Model	227.067	5.45986	3.13658	1.7407	0.0817355		Anova	model.00	4	40.544	46.649	-16.272	32.544	model.01	5	26.366	33.998	-8.183	16.366	16.178	1	5.767e-05	nsig	X227.0674_2	nHILIC	[M-H]-		Deoxyuridine	HMDB0000012	C00526	1
Single_Model	228.098	0.0899845	0.303129	0.296853	0.766579		Anova	model.00	4	40.544	46.649	-16.272	32.544	model.01	5	42.453	50.085	-16.227	32.453	0.0904	1	0.7636	nsig	X228.0978_8.7	pHILIC	[M+H]+		Deoxycytidine	HMDB0000014	C00881	3
Single_Model	131.046	-0.236354	0.621985	-0.38	0.703945		Anova	model.00	4	40.544	46.649	-16.272	32.544	model.01	5	42.404	50.035	-16.202	32.404	0.1401	1	0.7081	nsig	X131.0462_10.7	nHILIC	[M-H]-	0.678332	3-Ureidopropionic acid	HMDB0000026	C02642	2
Single_Model	514.283	-0.46673	0.481947	-0.968426	0.332832		Anova	model.00	4	40.544	46.649	-16.272	32.544	model.01	5	41.518	49.15	-15.759	31.518	1.0258	1	0.3112	nsig	X514.2825_9.9	nRPLC	[M-H]-	0.804005	Taurocholic acid	HMDB0000036	C05122	2
Single_Model	175.025	1.75359	0.983822	1.78242	0.0746801		Anova	model.00	4	40.544	46.649	-16.272	32.544	model.01	5	36.863	44.494	-13.431	26.863	5.681	1	0.01715	nsig	X175.0247_11.2	nHILIC	[M-H]-		Ascorbic acid	HMDB0000044	C01041	2
Single_Model	346.056	6.25995	3.30908	1.89175	0.0585242		Anova	model.00	4	40.544	46.649	-16.272	32.544	model.01	5	28.884	36.516	-9.442	18.884	13.66	1	0.0002191	nsig	X346.0556_10.6	nHILIC	[M-H]-		AMP	HMDB0000045	C00020	3
Single_Model	341.109	-0.431182	0.42247	-1.02062	0.307434		Anova	model.00	4	40.544	46.649	-16.272	32.544	model.01	5	41.107	48.739	-15.553	31.107	1.4369	1	0.2306	nsig	X341.1088_0.6	nRPLC	[M-H]-		Melibiose	HMDB0000048	C05400	3
Single_Model	268.104	0.218265	0.482646	0.452227	0.651105		Anova	model.00	4	40.544	46.649	-16.272	32.544	model.01	5	42.337	49.969	-16.168	32.337	0.2069	1	0.6492	nsig	X268.1039_2.9	pHILIC	[M+H]+	0.813049	Adenosine	HMDB0000050	C00212	1
Single_Model	291.13	-2.10524	1.23275	-1.70775	0.0876827		Anova	model.00	4	40.544	46.649	-16.272	32.544	model.01	5	37.63	45.262	-13.815	27.63	4.9138	1	0.02664	nsig	X291.1297_12.3	pHILIC	[M+H]+		Argininosuccinic acid	HMDB0000052	C03406	3
Single_Model	328.045	-0.674613	0.633241	-1.06533	0.286725		Anova	model.00	4	40.544	46.649	-16.272	32.544	model.01	5	41.485	49.116	-15.742	31.485	1.059	1	0.3034	nsig	X328.0447_2.9	nRPLC	[M-H]-	0.743158	Adenosine 3',5'-cyclic monophosphate	HMDB0000058	C00575	2
Single_Model	428.036	0.288711	0.561943	0.513774	0.60741		Anova	model.00	4	40.544	46.649	-16.272	32.544	model.01	5	42.264	49.896	-16.132	32.264	0.2795	1	0.597	nsig	X428.0362_11.3	pHILIC	[M+H]+		ADP	HMDB0000061	C00054	1
Single_Model	162.112	-0.330179	0.480974	-0.68648	0.492411		Anova	model.00	4	40.544	46.649	-16.272	32.544	model.01	5	42.037	49.669	-16.019	32.037	0.5062	1	0.4768	nsig	X162.1124_9.9	pHILIC	[M+H]+	0.811466	L-Carnitine	HMDB0000062	C00318	1
Single_Model	132.077	-1.48476	0.943509	-1.57365	0.115568		Anova	model.00	4	40.544	46.649	-16.272	32.544	model.01	5	39.109	46.74	-14.554	29.109	3.435	1	0.06383	nsig	X132.0768_9.2	pHILIC	[M+H]+	0.799685	Creatine	HMDB0000064	C00300	1
Single_Model	251.078	1.87577	1.05267	1.78191	0.0747642		Anova	model.00	4	40.544	46.649	-16.272	32.544	model.01	5	37.061	44.692	-13.53	27.061	5.483	1	0.0192	nsig	X251.0784_4.2	nHILIC	[M-H]-		Deoxyinosine	HMDB0000071	C05512	3
Single_Model	173.009	0.0372044	0.62271	0.0597459	0.952358		Anova	model.00	4	40.544	46.649	-16.272	32.544	model.01	5	42.54	50.172	-16.27	32.54	0.0036	1	0.9524	nsig	X173.009_9.2	nHILIC	[M-H]-		Aconitic acid	HMDB0000072	C00417	1
Single_Model	115.05	0.195672	0.400322	0.488786	0.624993		Anova	model.00	4	40.544	46.649	-16.272	32.544	model.01	5	42.299	49.93	-16.149	32.299	0.245	1	0.6206	nsig	X115.0502_1.4	pHILIC	[M+H]+	0.665535	Dihydrouracil	HMDB0000076	C00429	2
Single_Model	179.048	0.494472	0.778989	0.634762	0.525584		Anova	model.00	4	40.544	46.649	-16.272	32.544	model.01	5	42.135	49.767	-16.067	32.135	0.4086	1	0.5227	nsig	X179.048_0.7	pRPLC	[M+H]+		Cysteinylglycine	HMDB0000078	C01419	2
Single_Model	258.11	-2.61927	1.49512	-1.75187	0.0797956		Anova	model.00	4	40.544	46.649	-16.2718	32.544	model.01	5	27.435	35.067	-8.7174	17.435	15.109	1	0.0001015	nsig	X258.1101_10.7	pHILIC	[M+H]+	0.862091	Glycerophosphocholine	HMDB0000086	C00670	1
Single_Model	242.078	1.82774	1.03202	1.77103	0.076556		Anova	model.00	4	40.544	46.649	-16.272	32.544	model.01	5	38.152	45.784	-14.076	28.152	4.3913	1	0.03612	nsig	X242.0782_6.1	nHILIC	[M-H]-		Cytidine	HMDB0000089	C02961	1
Single_Model	104.071	-0.739739	0.712973	-1.03754	0.299483		Anova	model.00	4	40.544	46.649	-16.272	32.544	model.01	5	41.252	48.884	-15.626	31.252	1.2914	1	0.2558	nsig	X104.0706_1.3	pHILIC	[M+H]+		Dimethylglycine	HMDB0000092	C01026	3
Single_Model	322.044	1.06583	0.798934	1.33407	0.182181		Anova	model.00	4	40.544	46.649	-16.272	32.544	model.01	5	40.267	47.899	-15.133	30.267	2.2769	1	0.1313	nsig	X322.0444_11.7	nHILIC	[M-H]-	0.827239	Cytidine 5'-monophosphate	HMDB0000095	C00055	2
Single_Model	104.107	-0.348918	0.618085	-0.564514	0.572404		Anova	model.00	4	40.544	46.649	-16.272	32.544	model.01	5	42.177	49.809	-16.088	32.177	0.3666	1	0.5449	nsig	X104.107_6.8	pHILIC	[M+H]+	0.816144	Choline	HMDB0000097	C00114	1
Single_Model	214.048	-0.0557101	0.183785	-0.303126	0.761794		Anova	model.00	4	40.544	46.649	-16.272	32.544	model.01	5	42.454	50.086	-16.227	32.454	0.0899	1	0.7644	nsig	X214.0485_10.6	nHILIC	[M-H]-		Glycerylphosphorylethanolamine	HMDB0000114	C01233	2
Single_Model	74.0248	-0.576932	1.28208	-0.449997	0.652713		Anova	model.00	4	40.544	46.649	-16.272	32.544	model.01	5	42.345	49.977	-16.173	32.345	0.1984	1	0.656	nsig	X74.0248_9.8	nHILIC	[M-H]-	0.831224	Glycine	HMDB0000123	C00037	1
Single_Model	171.006	-0.47606	0.869634	-0.547426	0.584086		Anova	model.00	4	40.544	46.649	-16.272	32.544	model.01	5	42.228	49.86	-16.114	32.228	0.3154	1	0.5744	nsig	X171.0064_11.9	nHILIC	[M-H]-		Glycerol 3-phosphate	HMDB0000126	C00093	3
Single_Model	118.061	-0.960321	0.63624	-1.50937	0.131204		Anova	model.00	4	40.544	46.649	-16.272	32.544	model.01	5	39.507	47.138	-14.753	29.507	3.037	1	0.08138	nsig	X118.0611_9.5	pHILIC	[M+H]+		Guanidoacetic acid	HMDB0000128	C00581	1
Single_Model	152.056	0.276321	0.694966	0.397604	0.690922		Anova	model.00	4	40.544	46.649	-16.272	32.544	model.01	5	42.383	50.015	-16.192	32.383	0.1602	1	0.689	nsig	X152.0565_0.7	pRPLC	[M+H]+		Guanine	HMDB0000132	C00242	1
Single_Model	282.084	0.0551065	0.247423	0.222721	0.823752		Anova	model.00	4	40.544	46.649	-16.272	32.544	model.01	5	42.492	50.124	-16.246	32.492	0.0518	1	0.82	nsig	X282.0842_6.9	nHILIC	[M-H]-	0.806333	Guanosine	HMDB0000133	C00387	2
Single_Model	115.004	-1.50313	0.0344596	-43.62	0		Anova	model.00	4	40.544	46.649	-16.272	32.544	model.01	5	40.255	47.887	-15.128	30.255	2.2883	1	0.1304	nsig	X115.0036_2.3	nHILIC	[M-H]-	0.841326	Fumaric acid	HMDB0000134	C00122	1
Single_Model	146.046	-0.713329	1.11812	-0.637972	0.523492		Anova	model.00	4	40.544	46.649	-16.272	32.544	model.01	5	42.144	49.776	-16.072	32.144	0.4	1	0.5271	nsig	X146.0459_10.5	nHILIC	[M-H]-	0.853049	L-Glutamic acid	HMDB0000148	C00025	1
Single_Model	133.014	-4.05881	2.12078	-1.91383	0.055642		Anova	model.00	4	40.544	46.649	-16.272	32.544	model.01	5	34.431	42.063	-12.216	24.431	8.1124	1	0.004396	nsig	X133.0142_12.3	nHILIC	[M-H]-	0.776106	L-Malic acid	HMDB0000156	C00149	2
Single_Model	137.046	0.782647	0.862686	0.907222	0.36429		Anova	model.00	4	40.544	46.649	-16.272	32.544	model.01	5	41.725	49.357	-15.862	31.725	0.8189	1	0.3655	nsig	X137.0458_3.7	pHILIC	[M+H]+	0.872844	Hypoxanthine	HMDB0000157	C00262	1
Single_Model	180.067	-2.83975	1.76093	-1.61264	0.106822		Anova	model.00	4	40.544	46.649	-16.272	32.544	model.01	5	39.888	47.52	-14.944	29.888	2.6559	1	0.1032	nsig	X180.0666_7.9	nHILIC	[M-H]-	0.803852	L-Tyrosine	HMDB0000158	C00082	1
Single_Model	166.086	-0.207291	0.86894	-0.238556	0.81145		Anova	model.00	4	40.544	46.649	-16.272	32.544	model.01	5	42.485	50.117	-16.243	32.485	0.0583	1	0.8092	nsig	X166.0863_6.2	pHILIC	[M+H]+	0.861962	L-Phenylalanine	HMDB0000159	C00079	1
Single_Model	88.0404	-1.5642	1.44338	-1.08371	0.278495		Anova	model.00	4	40.544	46.649	-16.272	32.544	model.01	5	41.251	48.883	-15.625	31.251	1.2928	1	0.2555	nsig	X88.0404_9.2	nHILIC	[M-H]-	0.856592	L-Alanine	HMDB0000161	C00041	1
Single_Model	116.071	-1.70717	1.44951	-1.17776	0.238893		Anova	model.00	4	40.544	46.649	-16.272	32.544	model.01	5	40.641	48.273	-15.32	30.641	1.9027	1	0.1678	nsig	X116.0707_8	pHILIC	[M+H]+		L-Proline	HMDB0000162	C00148	1
Single_Model	118.051	-0.117176	1.28263	-0.0913561	0.92721		Anova	model.00	4	40.544	46.649	-16.272	32.544	model.01	5	42.536	50.167	-16.268	32.536	0.0081	1	0.9281	nsig	X118.051_9.2	nHILIC	[M-H]-	0.805164	Threonine	HMDB0000167	C00188	2
Single_Model	131.046	-3.6647	2.28377	-1.60467	0.108566		Anova	model.00	4	40.544	46.649	-16.272	32.544	model.01	5	37.729	45.361	-13.864	27.729	4.8148	1	0.02822	nsig	X131.0462_9.9	nHILIC	[M-H]-		L-Asparagine	HMDB0000168	C00152	1
Single_Model	347.04	-0.90511	0.624376	-1.44962	0.147164		Anova	model.00	4	40.544	46.649	-16.272	32.544	model.01	5	39.761	47.393	-14.881	29.761	2.7823	1	0.09531	nsig	X347.0397_11.9	nHILIC	[M-H]-		Inosinic acid	HMDB0000175	C00130	3
Single_Model	156.077	-1.73049	1.01179	-1.71032	0.0872074		Anova	model.00	4	40.544	46.649	-16.272	32.544	model.01	5	39.104	46.735	-14.552	29.104	3.4401	1	0.06363	nsig	X156.0768_10.5	pHILIC	[M+H]+	0.843032	Histidine	HMDB0000177	C00135	1
Single_Model	147.113	-1.22178	0.808523	-1.51113	0.130755		Anova	model.00	4	40.544	46.649	-16.272	32.544	model.01	5	39.921	47.553	-14.961	29.921	2.6222	1	0.1054	nsig	X147.1128_16.3	pHILIC	[M+H]+	0.837278	L-Lysine	HMDB0000182	C00047	1
Single_Model	104.035	-0.199987	0.936909	-0.213454	0.830973		Anova	model.00	4	40.544	46.649	-16.272	32.544	model.01	5	42.499	50.131	-16.25	32.499	0.0442	1	0.8334	nsig	X104.0353_10	nHILIC	[M-H]-	0.838859	L-Serine	HMDB0000187	C00065	1
Single_Model	132.03	0.712435	0.765225	0.931014	0.351846		Anova	model.00	4	40.544	46.649	-16.272	32.544	model.01	5	40.764	48.396	-15.382	30.764	1.7798	1	0.1822	nsig	X132.0302_10.6	nHILIC	[M-H]-	0.838171	L-Aspartic acid	HMDB0000191	C00049	1
Single_Model	239.016	-0.855971	0.675188	-1.26775	0.204887		Anova	model.00	4	40.544	46.649	-16.272	32.544	model.01	5	40.66	48.292	-15.33	30.66	1.8833	1	0.17	nsig	X239.0164_12.6	nHILIC	[M-H]-	0.743956	L-Cystine	HMDB0000192	C00491	1
Single_Model	241.129	0.592901	0.60917	0.973292	0.330408		Anova	model.00	4	40.544	46.649	-16.272	32.544	model.01	5	41.663	49.295	-15.832	31.663	0.8806	1	0.348	nsig	X241.1294_11.9	pHILIC	[M+H]+	0.759171	Anserine	HMDB0000194	C01262	2
Single_Model	267.073	0.314357	0.822677	0.382114	0.702377		Anova	model.00	4	40.544	46.649	-16.272	32.544	model.01	5	42.396	50.027	-16.198	32.396	0.148	1	0.7004	nsig	X267.0733_5.6	nHILIC	[M-H]-	0.852104	Inosine	HMDB0000195	C00294	1
Single_Model	176.07	-1.09946	0.636502	-1.72735	0.084104		Anova	model.00	4	40.544	46.649	-16.272	32.544	model.01	5	35.55	43.181	-12.775	25.55	6.9941	1	0.008178	nsig	X176.0703_6	pRPLC	[M+H]+		Indoleacetic acid	HMDB0000197	C00954	1
Single_Model	204.123	-1.31199	0.774116	-1.69483	0.0901085		Anova	model.00	4	40.544	46.649	-16.272	32.544	model.01	5	38.651	46.283	-14.326	28.651	3.8923	1	0.04851	nsig	X204.123_8.3	pHILIC	[M+H]+	0.841545	C2:0 AC (L-Acetylcarnitine)	HMDB0000201	C02571	1
Single_Model	189.123	0.254261	0.595139	0.42723	0.669212		Anova	model.00	4	40.544	46.649	-16.272	32.544	model.01	5	42.359	49.991	-16.18	32.359	0.1845	1	0.6675	nsig	X189.1233_8.6	pHILIC	[M+H]+	0.825035	N6-Acetyl-L-lysine	HMDB0000206	C02727	1
Single_Model	179.056	0.037847	1.75834	0.0215242	0.982827		Anova	model.00	4	40.544	46.649	-16.272	32.544	model.01	5	42.543	50.175	-16.272	32.543	0.0005	1	0.9828	nsig	X179.0561_9.6	nHILIC	[M-H]-	0.822383	Myo-Inositol	HMDB0000211	C00137	1
Single_Model	133.097	-0.295888	0.846812	-0.349414	0.726778		Anova	model.00	4	40.544	46.649	-16.272	32.544	model.01	5	42.42	50.051	-16.21	32.42	0.1241	1	0.7247	nsig	X133.0972_16.6	pHILIC	[M+H]+		Ornithine	HMDB0000214	C00077	1
Single_Model	204.087	-1.43262	0.814554	-1.75878	0.0786148		Anova	model.00	4	40.544	46.649	-16.272	32.544	model.01	5	39.216	46.847	-14.608	29.216	3.328	1	0.06811	nsig	X204.0866_10.6	pHILIC	[M+H-H2O]+	0.751595	N-Acetylglucosamine	HMDB0000215	C00140	2
Single_Model	140.012	0.115147	0.510306	0.225642	0.82148		Anova	model.00	4	40.544	46.649	-16.272	32.544	model.01	5	42.491	50.123	-16.246	32.491	0.0522	1	0.8193	nsig	X140.0118_14.2	nHILIC	[M-H]-	0.823255	O-Phosphoethanolamine	HMDB0000224	C00346	2
Single_Model	155.01	-0.00958747	0.512086	-0.0187224	0.985063		Anova	model.00	4	40.544	46.649	-16.272	32.544	model.01	5	42.543	50.175	-16.272	32.543	0.0004	1	0.985	nsig	X155.0098_6.6	nHILIC	[M-H]-		Orotic Acid	HMDB0000226	C00295	1
Single_Model	333.05	-0.0779847	0.428792	-0.181871	0.855684		Anova	model.00	4	40.544	46.649	-16.272	32.544	model.01	5	42.511	50.143	-16.255	32.511	0.0328	1	0.8563	nsig	X333.0496_8.7	nHILIC	[M-H]-		Nicotinamide ribotide	HMDB0000229	C00455	3
Single_Model	308.099	-0.454645	0.57619	-0.789054	0.43008		Anova	model.00	4	40.544	46.649	-16.272	32.544	model.01	5	41.903	49.535	-15.952	31.903	0.6403	1	0.4236	nsig	X308.0985_9.5	nHILIC	[M-H]-	0.807054	N-Acetylneuraminic acid	HMDB0000230	C19910	1
Single_Model	166.015	0.562922	0.719422	0.782464	0.433942		Anova	model.00	4	40.544	46.649	-16.272	32.544	model.01	5	41.793	49.425	-15.897	31.793	0.7503	1	0.3864	nsig	X166.0146_11.4	nHILIC	[M-H]-	0.768711	Quinolinic acid	HMDB0000232	C03722	2
Single_Model	326.094	-0.172034	0.344064	-0.500006	0.617071		Anova	model.00	4	40.544	46.649	-16.272	32.544	model.01	5	42.273	49.905	-16.136	32.273	0.2708	1	0.6028	nsig	X326.094_8.3	nRPLC	[M-H]-		Thiamine mononitrate	HMDB0000235	C00378	3
Single_Model	80.9652	0.256667	0.595295	0.431159	0.666353		Anova	model.00	4	40.544	46.649	-16.272	32.544	model.01	5	42.36	49.991	-16.18	32.36	0.1841	1	0.6679	nsig	X80.9652_7.7	nHILIC	[M-H]-		Sulfite	HMDB0000240	C00094	3
Single_Model	87.0088	-0.670515	1.3218	-0.507275	0.611962		Anova	model.00	4	40.544	46.649	-16.272	32.544	model.01	5	42.288	49.92	-16.144	32.288	0.2556	1	0.6132	nsig	X87.0088_10.2	nHILIC	[M-H]-	0.735161	Pyruvic acid	HMDB0000243	C00022	2
Single_Model	227.102	0.877511	0.888106	0.98807	0.323118		Anova	model.00	4	40.544	46.649	-16.272	32.544	model.01	5	40.921	48.553	-15.461	30.921	1.6225	1	0.2027	nsig	X227.1025_11.1	pHILIC	[M+H]+		Porphobilinogen	HMDB0000245	C00931	3
Single_Model	124.007	0.801447	0.944138	0.848866	0.395956		Anova	model.00	4	40.544	46.649	-16.272	32.544	model.01	5	41.75	49.382	-15.875	31.75	0.7933	1	0.3731	nsig	X124.0074_8.9	nHILIC	[M-H]-	0.87608	Taurine	HMDB0000251	C00245	1
Single_Model	300.289	-0.32079	0.260089	-1.23339	0.217431		Anova	model.00	4	40.544	46.649	-16.272	32.544	model.01	5	40.821	48.452	-15.41	30.821	1.723	1	0.1893	nsig	X300.2895_0.9	pHILIC	[M+H]+		Sphingosine	HMDB0000252	C00319	2
Single_Model	117.019	-0.456081	0.657555	-0.693602	0.487932		Anova	model.00	4	40.544	46.649	-16.272	32.544	model.01	5	42.048	49.68	-16.024	32.048	0.4956	1	0.4814	nsig	X117.0193_10.1	nHILIC	[M-H]-	0.847093	Succinic acid	HMDB0000254	C00042	2
Single_Model	125.036	0.250072	0.286921	0.871573	0.383441		Anova	model.00	4	40.544	46.649	-16.272	32.544	model.01	5	41.759	49.391	-15.88	31.759	0.7843	1	0.3758	nsig	X125.0356_1.2	nHILIC	[M-H]-	0.700873	Thymine	HMDB0000262	C00178	2
Single_Model	128.035	3.52897	1.82132	1.93759	0.0526732		Anova	model.00	4	40.544	46.649	-16.272	32.544	model.01	5	36.049	43.681	-13.025	26.049	6.4945	1	0.01082	nsig	X128.0353_7.9	nHILIC	[M-H]-	0.838933	L-Pyroglutamic acid	HMDB0000267	C01879	1
Single_Model	302.305	-0.271541	0.669498	-0.405589	0.685044		Anova	model.00	4	40.544	46.649	-16.272	32.544	model.01	5	42.379	50.011	-16.19	32.379	0.1643	1	0.6852	nsig	X302.3052_4.1	pHILIC	[M+H]+		Sphinganine	HMDB0000269	C00836	3
Single_Model	90.055	-1.89034	1.14489	-1.65111	0.0987152		Anova	model.00	4	40.544	46.649	-16.272	32.544	model.01	5	37.667	45.299	-13.834	27.667	4.8766	1	0.02722	nsig	X90.055_1.5	pHILIC	[M+H]+	0.772671	Sarcosine	HMDB0000271	C00213	2
Single_Model	277.139	0.119944	0.355989	0.336932	0.736168		Anova	model.00	4	40.544	46.649	-16.272	32.544	model.01	5	42.425	50.056	-16.212	32.425	0.119	1	0.7301	nsig	X277.1392_11.7	pHILIC	[M+H]+		Saccharopine	HMDB0000279	C00449	3
Single_Model	565.047	-0.667063	0.561592	-1.18781	0.234909		Anova	model.00	4	40.544	46.649	-16.272	32.544	model.01	5	41.194	48.826	-15.597	31.194	1.3495	1	0.2454	nsig	X565.0466_0.7	nRPLC	[M-H]-	0.747274	Uridine diphosphate glucose	HMDB0000286	C00029	2
Single_Model	323.028	0.0604685	0.846142	0.0714638	0.943029		Anova	model.00	4	40.544	46.649	-16.272	32.544	model.01	5	42.539	50.17	-16.269	32.539	0.0051	1	0.943	nsig	X323.0284_10.9	nHILIC	[M-H]-		Uridine 5'-monophosphate	HMDB0000288	C00105	3
Single_Model	167.02	-0.0616919	0.278062	-0.221864	0.82442		Anova	model.00	4	40.544	46.649	-16.272	32.544	model.01	5	42.495	50.127	-16.247	32.495	0.0489	1	0.825	nsig	X167.0205_0.6	nRPLC	[M+H]+		Uric acid	HMDB0000289	C00366	1
Single_Model	606.075	-0.0152594	0.137488	-0.110988	0.911626		Anova	model.00	4	40.544	46.649	-16.272	32.544	model.01	5	42.531	50.163	-16.266	32.531	0.0124	1	0.9115	nsig	X606.0746_10.6	nHILIC	[M-H]-	0.800014	Uridine diphosphate-N-acetylglucosamine	HMDB0000290	C00043	2
Single_Model	151.026	-0.544148	1.62292	-0.335289	0.737407		Anova	model.00	4	40.544	46.649	-16.272	32.544	model.01	5	42.43	50.062	-16.215	32.43	0.1135	1	0.7362	nsig	X151.0261_4.7	nHILIC	[M-H]-	0.87822	Xanthine	HMDB0000292	C00385	1
Single_Model	405.009	-0.785594	0.624664	-1.25763	0.208527		Anova	model.00	4	40.544	46.649	-16.272	32.544	model.01	5	41.336	48.967	-15.668	31.336	1.208	1	0.2717	nsig	X405.0091_10.9	pHILIC	[M+H]+		Uridine 5'-diphosphate	HMDB0000295	C00015	1
Single_Model	243.062	0.86781	1.16087	0.747551	0.454731		Anova	model.00	4	40.544	46.649	-16.272	32.544	model.01	5	41.902	49.534	-15.951	31.902	0.6418	1	0.4231	nsig	X243.0621_4	nHILIC	[M-H]-	0.83688	Uridine	HMDB0000296	C00299	1
Single_Model	137.036	-1.32357	0.728826	-1.81604	0.0693647		Anova	model.00	4	40.544	46.649	-16.272	32.544	model.01	5	38.092	45.724	-14.046	28.092	4.4514	1	0.03487	nsig	X137.0356_3.2	nHILIC	[M-H]-		Urocanic acid	HMDB0000301	C00785	1
Single_Model	565.048	0.606079	0.885713	0.684283	0.493797		Anova	model.00	4	40.544	46.649	-16.272	32.544	model.01	5	41.391	49.023	-15.696	31.391	1.1522	1	0.2831	nsig	X565.0482_10.9	nHILIC	[M-H]-	0.65368	Uridine diphosphate glucose	HMDB0000302	C00052	1
Single_Model	287.236	-1.42329	0.966342	-1.47286	0.140789		Anova	model.00	4	40.544	46.649	-16.272	32.544	model.01	5	37.846	45.478	-13.923	27.846	4.6977	1	0.0302	nsig	X287.2358_11.2	pRPLC	[M+H]+		Vitamin A	HMDB0000305	C19962	3
Single_Model	375.181	0.102638	0.222542	0.461209	0.644649		Anova	model.00	4	40.544	46.649	-16.272	32.544	model.01	5	42.335	49.967	-16.168	32.335	0.2086	1	0.6479	nsig	X375.1811_1.5	nHILIC	[M-H]-		18-Oxocortisol	HMDB0000332	NA	3
Single_Model	171.066	-1.17626	0.73712	-1.59576	0.110543		Anova	model.00	4	40.544	46.649	-16.272	32.544	model.01	5	39.53	47.162	-14.765	29.53	3.0139	1	0.08255	nsig	X171.0662_2.8	nRPLC	[M-H]-		C8:1, DC FA (Octenedioic acid)	HMDB0000341	NA	2
Single_Model	217.108	-0.305691	0.634835	-0.481528	0.630141		Anova	model.00	4	40.544	46.649	-16.272	32.544	model.01	5	42.31	49.942	-16.155	32.31	0.2339	1	0.6286	nsig	X217.108_8.4	nHILIC	[M-H]-		3-Hydroxysebacic acid	HMDB0000350	NA	3
Single_Model	331.225	-0.299414	0.51369	-0.582869	0.559981		Anova	model.00	4	40.544	46.649	-16.272	32.544	model.01	5	42.203	49.835	-16.101	32.203	0.3408	1	0.5594	nsig	X331.2253_8	pRPLC	[M+H]+		Hydroxyprogesterone	HMDB0000374	C01176	2
Single_Model	165.055	0.518829	0.767148	0.676309	0.498845		Anova	model.00	4	40.544	46.649	-16.272	32.544	model.01	5	42.141	49.773	-16.071	32.141	0.4025	1	0.5258	nsig	X165.0553_3.8	nRPLC	[M-H]-	0.758393	3-(3-Hydroxyphenyl)propionic acid	HMDB0000375	C11457	2
Single_Model	383.154	0.17003	0.269292	0.631397	0.527781		Anova	model.00	4	40.544	46.649	-16.272	32.544	model.01	5	42.136	49.768	-16.068	32.136	0.4073	1	0.5234	nsig	X383.1543_4.6	nHILIC	[M-H]-		3b,16a-Dihydroxyandrostenone sulfate	HMDB0000386	NA	3
Single_Model	141.092	-0.639696	0.814587	-0.785301	0.432277		Anova	model.00	4	40.544	46.649	-16.272	32.544	model.01	5	41.913	49.545	-15.956	31.913	0.6309	1	0.427	nsig	X141.0919_5.5	nRPLC	[M-H]-		C8:1 FA (Octenoic acid)	HMDB0000392	NA	2
Single_Model	143.035	-0.40323	0.601867	-0.669965	0.50288		Anova	model.00	4	40.544	46.649	-16.272	32.544	model.01	5	42.049	49.681	-16.024	32.049	0.4949	1	0.4817	nsig	X143.0349_3	nHILIC	[M-H]-		C6:1, DC FA (Hexenedioic acid)	HMDB0000393	NA	2
Single_Model	273.171	-0.0496307	0.599265	-0.0828192	0.933995		Anova	model.00	4	40.544	46.649	-16.272	32.544	model.01	5	42.537	50.169	-16.268	32.537	0.0069	1	0.934	nsig	X273.1709_8.1	nRPLC	[M-H]-		3-Hydroxytetradecanedioic acid	HMDB0000394	NA	3
Single_Model	267.072	0.632239	0.820963	0.770119	0.441229		Anova	model.00	4	40.544	46.649	-16.272	32.544	model.01	5	41.913	49.545	-15.957	31.913	0.6305	1	0.4272	nsig	X267.0719_10	nHILIC	[M-H]-	0.866142	3-Deoxy-D-glycero-D-galacto-2-nonulosonic acid	HMDB0000425	NA	2
Single_Model	195.066	0.361438	0.372531	0.970222	0.331936		Anova	model.00	4	40.544	46.649	-16.272	32.544	model.01	5	41.656	49.287	-15.828	31.656	0.8881	1	0.346	nsig	X195.0662_3.3	nHILIC	[M-H]-		Homoveratric acid	HMDB0000434	NA	3
Single_Model	170.092	1.64185	0.605479	2.71165	0.00669494		Anova	model.00	4	40.544	46.649	-16.272	32.544	model.01	5	39.489	47.121	-14.745	29.489	3.0546	1	0.08051	nsig	X170.0923_10.5	pHILIC	[M+H]+	0.817822	3-Methylhistidine	HMDB0000479	C01152	1
Single_Model	159.102	-1.89319	1.45738	-1.29904	0.193932		Anova	model.00	4	40.544	46.649	-16.272	32.544	model.01	5	40.523	48.154	-15.261	30.523	2.021	1	0.1551	nsig	X159.1025_4.8	nRPLC	[M-H]-	0.742816	C8:0,OH FA (Hydroxyoctanoic acid)	HMDB0000486	NA	2
Single_Model	116.035	0.923751	0.827756	1.11597	0.264435		Anova	model.00	4	40.544	46.649	-16.272	32.544	model.01	5	40.716	48.347	-15.358	30.716	1.8281	1	0.1764	nsig	X116.0353_7	nHILIC	[M-H]-	0.673543	Acetylglycine	HMDB0000532	NA	2
Single_Model	159.066	-0.696397	0.614178	-1.13387	0.25685		Anova	model.00	4	40.544	46.649	-16.272	32.544	model.01	5	41.155	48.787	-15.578	31.155	1.3887	1	0.2386	nsig	X159.0662_2.3	nHILIC	[M-H]-		3-Methyladipic acid	HMDB0000555	NA	3
Single_Model	114.066	-3.53637	1.88562	-1.87544	0.0607326		Anova	model.00	4	40.544	46.649	-16.272	32.544	model.01	5	34.685	42.317	-12.342	24.685	7.8586	1	0.005058	nsig	X114.0662_3.3	pHILIC	[M+H]+	0.780266	Creatinine	HMDB0000562	C00791	1
Single_Model	147.045	-0.276942	0.962682	-0.287677	0.773594		Anova	model.00	4	40.544	46.649	-16.272	32.544	model.01	5	42.462	50.094	-16.231	32.462	0.0817	1	0.775	nsig	X147.0449_0.9	nRPLC	[M-H]-		Cinnamic acid	HMDB0000567	C10438	3
Single_Model	122.027	-0.141019	0.236934	-0.595184	0.55172		Anova	model.00	4	40.544	46.649	-16.272	32.544	model.01	5	42.183	49.815	-16.091	32.183	0.3608	1	0.548	nsig	X122.0269_11.2	pHILIC	[M+H]+		L-Cysteine	HMDB0000574	C00097	1
Single_Model	131.035	-0.899238	0.617687	-1.45581	0.145444		Anova	model.00	4	40.544	46.649	-16.272	32.544	model.01	5	40.231	47.863	-15.116	30.231	2.3127	1	0.1283	nsig	X131.0349_3.3	nHILIC	[M-H]-		Monoethyl malonic acid	HMDB0000576	NA	3
Single_Model	293.114	1.07139	0.843433	1.27027	0.203988		Anova	model.00	4	40.544	46.649	-16.272	32.544	model.01	5	40.833	48.465	-15.416	30.833	1.7109	1	0.1909	nsig	X293.1141_9	nHILIC	[M-H]-		gamma-Glutamylphenylalanine	HMDB0000594	NA	3
Single_Model	407.28	0.452758	0.282219	1.60428	0.108652		Anova	model.00	4	40.544	46.649	-16.272	32.544	model.01	5	39.45	47.082	-14.725	29.45	3.0937	1	0.0786	nsig	X407.2797_9.7	nRPLC	[M-H]-	0.742235	Cholic acid	HMDB0000619	C00695	2
Single_Model	195.051	-0.274005	0.772686	-0.354614	0.722879		Anova	model.00	4	40.544	46.649	-16.272	32.544	model.01	5	42.428	50.06	-16.214	32.428	0.1153	1	0.7342	nsig	X195.0509_10.6	nHILIC	[M-H]-		Gluconic acid	HMDB0000625	C00257	2
Single_Model	378.104	-0.632018	0.666346	-0.948483	0.342884		Anova	model.00	4	40.544	46.649	-16.272	32.544	model.01	5	41.529	49.161	-15.765	31.529	1.0145	1	0.3138	nsig	X378.104_8.7	nHILIC	[M-H]-		Chondroitin	HMDB0000629	C00401	3
Single_Model	112.051	0.055907	0.710032	0.0787387	0.937241		Anova	model.00	4	40.544	46.649	-16.272	32.544	model.01	5	42.537	50.169	-16.269	32.537	0.0062	1	0.9373	nsig	X112.0506_4.6	pHILIC	[M+H]+	0.827029	Cytosine	HMDB0000630	C00380	1
Single_Model	129.019	-1.04956	0.969633	-1.08243	0.279062		Anova	model.00	4	40.544	46.649	-16.272	32.544	model.01	5	41.256	48.888	-15.628	31.256	1.2873	1	0.2565	nsig	X129.0193_11.2	nHILIC	[M-H]-	0.715333	Citraconic acid	HMDB0000634	C02226	2
Single_Model	145.062	-0.534973	0.940511	-0.568811	0.569484		Anova	model.00	4	40.544	46.649	-16.272	32.544	model.01	5	42.14	49.772	-16.07	32.14	0.4039	1	0.5251	nsig	X145.0618_9.7	nHILIC	[M-H]-	0.87911	L-Glutamine	HMDB0000641	C00064	1
Single_Model	316.248	-0.10355	0.185512	-0.558186	0.576717		Anova	model.00	4	40.544	46.649	-16.272	32.544	model.01	5	42.235	49.867	-16.118	32.235	0.3083	1	0.5787	nsig	X316.2481_5.7	pHILIC	[M+H]+	0.770104	C10:0 AC (Decanoylcarnitine)	HMDB0000651	NA	2
Single_Model	465.304	0.413422	0.27248	1.51726	0.129202		Anova	model.00	4	40.544	46.649	-16.272	32.544	model.01	5	38.351	45.983	-14.175	28.351	4.1928	1	0.0406	nsig	X465.3042_0.9	nHILIC	[M-H]-		Cholesterol sulfate	HMDB0000653	C18043	3
Single_Model	425.08	0.0986226	1.0025	0.0983765	0.921633		Anova	model.00	4	40.544	46.649	-16.272	32.544	model.01	5	42.534	50.166	-16.267	32.534	0.0098	1	0.9213	nsig	X425.0805_12.5	nHILIC	[M-H]-	0.85359	Cysteineglutathione disulfide	HMDB0000656	NA	1
Single_Model	209.03	-0.942673	0.758312	-1.24312	0.213824		Anova	model.00	4	40.544	46.649	-16.272	32.544	model.01	5	40.497	48.129	-15.248	30.497	2.0466	1	0.1525	nsig	X209.0303_12.6	nHILIC	[M-H]-		Glucaric acid	HMDB0000663	C00818	2
Single_Model	131.071	-0.446579	1.00859	-0.442774	0.657929		Anova	model.00	4	40.544	46.649	-16.272	32.544	model.01	5	42.327	49.959	-16.164	32.327	0.2164	1	0.6418	nsig	X131.0714_3.1	nHILIC	[M-H]-	0.76881	C6:0,OH FA (Hydroxyhexanoic acid)	HMDB0000665	NA	2
Single_Model	189.135	-1.51676	1.30834	-1.1593	0.246332		Anova	model.00	4	40.544	46.649	-16.272	32.544	model.01	5	40.737	48.369	-15.368	30.737	1.8067	1	0.1789	nsig	X189.1345_14.8	pHILIC	[M+H]+	0.855531	Homoarginine	HMDB0000670	C01924	1
Single_Model	204.067	-0.782059	0.568806	-1.37491	0.169158		Anova	model.00	4	40.544	46.649	-16.272	32.544	model.01	5	40.211	47.843	-15.105	30.211	2.3329	1	0.1267	nsig	X204.0666_5.5	nHILIC	[M-H]-	0.724142	Indolelactic acid	HMDB0000671	C02043	2
Single_Model	209.091	-0.145923	0.402767	-0.362302	0.717127		Anova	model.00	4	40.544	46.649	-16.272	32.544	model.01	5	42.413	50.045	-16.206	32.413	0.1308	1	0.7176	nsig	X209.0911_3.5	pRPLC	[M+H]+		L-Kynurenine	HMDB0000684	C00328	3
Single_Model	132.102	-0.225664	0.846826	-0.266482	0.789868		Anova	model.00	4	40.544	46.649	-16.272	32.544	model.01	5	42.47	50.102	-16.235	32.47	0.0735	1	0.7863	nsig	X132.1019_6.5	pHILIC	[M+H]+	0.852677	L-Isoleucine|L-Leucine	HMDB0000687	C00123	1
Single_Model	150.058	0.0109435	0.168855	0.0648096	0.948326		Anova	model.00	4	40.544	46.649	-16.272	32.544	model.01	5	42.539	50.171	-16.27	32.539	0.0042	1	0.9483	nsig	X150.0583_7.2	pHILIC	[M+H]+	0.663864	L-Methionine	HMDB0000696	C00073	2
Single_Model	179.035	-0.372964	0.462726	-0.806016	0.420234		Anova	model.00	4	40.544	46.649	-16.272	32.544	model.01	5	41.879	49.51	-15.939	31.879	0.665	1	0.4148	nsig	X179.035_2.8	nHILIC	[M-H]-		4-Hydroxyphenylpyruvic acid	HMDB0000707	C01179	3
Single_Model	130.086	-0.315038	0.491733	-0.640668	0.521738		Anova	model.00	4	40.544	46.649	-16.272	32.544	model.01	5	42.095	49.727	-16.047	32.095	0.4486	1	0.503	nsig	X130.0863_7.7	pHILIC	[M+H]+		L-Pipecolic acid	HMDB0000716	C00408	1
Single_Model	253.056	-0.51703	0.599287	-0.862743	0.388279		Anova	model.00	4	40.544	46.649	-16.272	32.544	model.01	5	41.75	49.382	-15.875	31.75	0.7938	1	0.373	nsig	X253.0564_9.7	nHILIC	[M-H]-		Magnesium levulinate	HMDB0000720	NA	3
Single_Model	132.065	-1.00088	1.03293	-0.968969	0.332561		Anova	model.00	4	40.544	46.649	-16.272	32.544	model.01	5	41.496	49.127	-15.748	31.496	1.0481	1	0.3059	nsig	X132.0655_9	pHILIC	[M+H]+	0.797466	4-HydroxyProline	HMDB0000725	C01157	1
Single_Model	252.073	-0.588649	0.750747	-0.784085	0.43299		Anova	model.00	4	40.544	46.649	-16.272	32.544	model.01	5	41.879	49.511	-15.939	31.879	0.6649	1	0.4148	nsig	X252.0734_8.6	nRPLC	[M-H]-		L-Threoneopterin	HMDB0000727	NA	3
Single_Model	188.07	-0.294779	0.522554	-0.564112	0.572678		Anova	model.00	4	40.544	46.649	-16.272	32.544	model.01	5	42.235	49.867	-16.118	32.235	0.3084	1	0.5787	nsig	X188.0702_1.4	pRPLC	[M+H]+		Indoleacrylic acid	HMDB0000734	NA	3
Single_Model	230.139	0.566598	0.808683	0.700643	0.483526		Anova	model.00	4	40.544	46.649	-16.272	32.544	model.01	5	42.04	49.672	-16.02	32.04	0.5038	1	0.4778	nsig	X230.139_4.8	nRPLC	[M-H]-		Isobutyryl-L-carnitine	HMDB0000736	NA	3
Single_Model	118.065	-0.94219	0.827074	-1.13918	0.254626		Anova	model.00	4	40.544	46.649	-16.272	32.544	model.01	5	40.855	48.487	-15.427	30.855	1.6889	1	0.1937	nsig	X118.0651_0.9	pHILIC	[M+H]+		Indole	HMDB0000738	C00463	3
Single_Model	132.066	-0.33614	0.584703	-0.574889	0.565366		Anova	model.00	4	40.544	46.649	-16.272	32.544	model.01	5	42.206	49.838	-16.103	32.206	0.3376	1	0.5612	nsig	X132.0656_11.1	pHILIC	[M+H]+	0.786245	N-Acetyl-L-alanine	HMDB0000766	NA	2
Single_Model	243.062	-0.184221	1.10216	-0.167145	0.867256		Anova	model.00	4	40.544	46.649	-16.272	32.544	model.01	5	42.516	50.148	-16.258	32.516	0.0274	1	0.8684	nsig	X243.0621_6	nHILIC	[M-H]-	0.845702	Pseudouridine	HMDB0000767	C02067	1
Single_Model	380.119	-3.93668	2.52795	-1.55726	0.119408		Anova	model.00	4	40.544	46.649	-16.272	32.544	model.01	5	32.274	39.906	-11.137	22.274	10.269	1	0.001353	nsig	X380.1193_1.4	nRPLC	[M-H]-		N-Acetyl-9-O-lactoylneuraminic acid	HMDB0000768	NA	3
Single_Model	165.056	-0.271033	0.892207	-0.303778	0.761297		Anova	model.00	4	40.544	46.649	-16.272	32.544	model.01	5	42.447	50.079	-16.224	32.447	0.0965	1	0.756	nsig	X165.0557_3.3	nHILIC	[M-H]-	0.807488	3-Phenyllactic acid	HMDB0000779	C01479	2
Single_Model	300.039	1.79373	0.984248	1.82244	0.068389		Anova	model.00	4	40.544	46.649	-16.272	32.544	model.01	5	37.602	45.234	-13.801	27.602	4.9416	1	0.02622	nsig	X300.0392_8.6	nHILIC	[M-H]-	0.652141	N-Acetyl-D-galactosamine 4-sulfate	HMDB0000781	C16265	2
Single_Model	350.109	1.30239	0.838673	1.55292	0.120442		Anova	model.00	4	40.544	46.649	-16.272	32.544	model.01	5	39.572	47.204	-14.786	29.572	2.9713	1	0.08475	nsig	X350.1091_8.3	nHILIC	[M-H]-		N-Acetyl-7-O-acetylneuraminic acid	HMDB0000785	C04016	3
Single_Model	287.052	-1.40906	0.844946	-1.66764	0.095388		Anova	model.00	4	40.544	46.649	-16.272	32.544	model.01	5	40.025	47.657	-15.013	30.025	2.5183	1	0.1125	nsig	X287.0519_8.2	nHILIC	[M-H]-	0.806274	Orotidine	HMDB0000788	C01103	1
Single_Model	391.285	0.0578223	0.227002	0.254721	0.798938		Anova	model.00	4	40.544	46.649	-16.272	32.544	model.01	5	42.482	50.114	-16.241	32.482	0.0616	1	0.804	nsig	X391.2852_1.9	nHILIC	[M-H]-	0.774907	Murocholic acid	HMDB0000811	C15515	2
Single_Model	174.041	0.0619176	0.176085	0.351636	0.725112		Anova	model.00	4	40.544	46.649	-16.272	32.544	model.01	5	42.406	50.038	-16.203	32.406	0.1372	1	0.7111	nsig	X174.0407_10.3	nHILIC	[M-H]-		N-Acetyl-L-aspartic acid	HMDB0000812	C01042	1
Single_Model	300.039	18.7918	13.8482	1.35699	0.174785		Anova	model.00	4	40.544	46.649	-16.2718	32.544	model.01	5	25.898	33.53	-7.9489	15.898	16.646	1	4.505e-05	nsig	X300.0392_7.8	nHILIC	[M-H]-	0.82732	N-Acetylglucosamine 6-sulfate	HMDB0000814	C04132	1
Single_Model	268.103	0.318888	0.460952	0.691803	0.489061		Anova	model.00	4	40.544	46.649	-16.272	32.544	model.01	5	41.98	49.612	-15.99	31.98	0.5639	1	0.4527	nsig	X268.1026_11.2	pHILIC	[M+H]+		Neuraminic acid	HMDB0000830	C06469	3
Single_Model	202.144	0.34415	0.752994	0.457042	0.647641		Anova	model.00	4	40.544	46.649	-16.272	32.544	model.01	5	42.336	49.968	-16.168	32.336	0.2072	1	0.6489	nsig	X202.1437_10.2	pHILIC	[M+H]+		Capryloylglycine	HMDB0000832	NA	3
Single_Model	194.046	-0.600335	0.379431	-1.5822	0.113604		Anova	model.00	4	40.544	46.649	-16.272	32.544	model.01	5	39.398	47.03	-14.699	29.398	3.1455	1	0.07614	nsig	X194.046_4.8	nHILIC	[M-H]-	0.676246	2-Hydroxyhippuric acid	HMDB0000840	C07588	2
Single_Model	428.373	0.235558	0.325624	0.723404	0.469432		Anova	model.00	4	40.544	46.649	-16.272	32.544	model.01	5	42.016	49.648	-16.008	32.016	0.5278	1	0.4675	nsig	X428.3725_10.8	pRPLC	[M+H]+	0.744107	C18:0 AC (Stearoylcarnitine)	HMDB0000848	NA	2
Single_Model	256.104	-8.64736	5.7634	-1.50039	0.133513		Anova	model.00	4	40.544	46.649	-16.272	32.544	model.01	5	35.512	43.144	-12.756	25.512	7.0317	1	0.008008	nsig	X256.1042_1.4	pRPLC	[M+H]+		Nicotinamide riboside	HMDB0000855	C03150	3
Single_Model	500.304	-0.151216	0.189663	-0.797284	0.425286		Anova	model.00	4	40.544	46.649	-16.272	32.544	model.01	5	41.889	49.521	-15.944	31.889	0.6547	1	0.4184	nsig	X500.3044_10.3	pRPLC	[M+H]+		Tauroursodeoxycholic acid	HMDB0000874	NA	3
Single_Model	118.086	-1.85939	1.22121	-1.52258	0.127864		Anova	model.00	4	40.544	46.649	-16.272	32.544	model.01	5	38.648	46.279	-14.324	28.648	3.8961	1	0.0484	nsig	X118.0863_7.3	pHILIC	[M+H]+	0.833687	L-Valine	HMDB0000883	C00183	1
Single_Model	144.065	-0.253945	0.597925	-0.424711	0.671048		Anova	model.00	4	40.544	46.649	-16.272	32.544	model.01	5	42.361	49.993	-16.18	32.361	0.1829	1	0.6689	nsig	X144.0655_1.9	pHILIC	[M+H]+		Vinylacetylglycine	HMDB0000894	NA	3
Single_Model	146.118	0.477193	0.674026	0.707975	0.478961		Anova	model.00	4	40.544	46.649	-16.272	32.544	model.01	5	42.03	49.662	-16.015	32.03	0.5135	1	0.4736	nsig	X146.1176_11.1	pHILIC	[M+H]+	0.795916	Acetylcholine	HMDB0000895	C01996	1
Single_Model	166.072	0.596829	0.54727	1.09056	0.275468		Anova	model.00	4	40.544	46.649	-16.272	32.544	model.01	5	41.299	48.931	-15.649	31.299	1.2448	1	0.2645	nsig	X166.0723_3.8	pHILIC	[M+H]+		7-Methylguanine	HMDB0000897	C02242	1
Single_Model	174.088	-0.107175	0.317249	-0.337826	0.735494		Anova	model.00	4	40.544	46.649	-16.272	32.544	model.01	5	42.43	50.062	-16.215	32.43	0.1138	1	0.7359	nsig	X174.0882_10.3	nHILIC	[M-H]-		Citrulline	HMDB0000904	C00327	1
Single_Model	213.186	1.00418	1.03839	0.967048	0.33352		Anova	model.00	4	40.544	46.649	-16.272	32.544	model.01	5	41.507	49.139	-15.754	31.507	1.0363	1	0.3087	nsig	X213.1859_10.7	nRPLC	[M-H]-	0.777656	C13:0 FA (Tridecanoic acid)	HMDB0000910	C17076	2
Single_Model	211.061	0.0153515	0.233874	0.06564	0.947664		Anova	model.00	4	40.544	46.649	-16.272	32.544	model.01	5	42.539	50.171	-16.27	32.539	0.0043	1	0.9476	nsig	X211.0612_2.1	nHILIC	[M-H]-		Vanillactic acid	HMDB0000913	NA	3
Single_Model	76.0757	-1.20658	0.630578	-1.91345	0.0556901		Anova	model.00	4	40.544	46.649	-16.272	32.544	model.01	5	37.174	44.806	-13.587	27.174	5.3694	1	0.02049	nsig	X76.0757_9.4	pHILIC	[M+H]+	0.826084	Trimethylamine N-oxide (TMAO)	HMDB0000925	C01104	2
Single_Model	80.0494	-0.319677	0.585582	-0.545914	0.585125		Anova	model.00	4	40.544	46.649	-16.272	32.544	model.01	5	42.23	49.862	-16.115	32.23	0.3135	1	0.5756	nsig	X80.0494_1.4	pHILIC	[M+H]+	0.830188	Pyridine	HMDB0000926	C00747	2
Single_Model	205.097	-0.966784	0.660701	-1.46327	0.143394		Anova	model.00	4	40.544	46.649	-16.272	32.544	model.01	5	40.156	47.788	-15.078	30.156	2.3876	1	0.1223	nsig	X205.097_6.8	pHILIC	[M+H]+	0.757096	L-Tryptophan	HMDB0000929	C00078	1
Single_Model	579.026	-0.0862284	0.561234	-0.153641	0.877893		Anova	model.00	4	40.544	46.649	-16.272	32.544	model.01	5	42.52	50.152	-16.26	32.52	0.0236	1	0.8778	nsig	X579.0262_9.9	nRPLC	[M-H]-		Uridine diphosphate glucuronic acid	HMDB0000935	C00167	3
Single_Model	309.015	-0.405568	0.850036	-0.477119	0.633278		Anova	model.00	4	40.544	46.649	-16.272	32.544	model.01	5	42.311	49.943	-16.155	32.311	0.2329	1	0.6294	nsig	X309.0151_4.7	nHILIC	[M-H]-		Calcium threonate	HMDB0000943	C01620	3
Single_Model	185.155	-0.0310319	0.738085	-0.0420438	0.966464		Anova	model.00	4	40.544	46.649	-16.272	32.544	model.01	5	42.542	50.174	-16.271	32.542	0.0018	1	0.9665	nsig	X185.1545_9.9	nRPLC	[M-H]-	0.727092	C11:0 FA (Undecanoic acid)	HMDB0000947	C17715	2
Single_Model	98.9842	-0.936925	0.688542	-1.36074	0.173597		Anova	model.00	4	40.544	46.649	-16.272	32.544	model.01	5	40.419	48.051	-15.21	30.419	2.1246	1	0.145	nsig	X98.9842_12.1	pHILIC	[M+H]+		Hydrogen phosphate	HMDB0000973	C00009	3
Single_Model	206.046	0.176969	0.228571	0.77424	0.438789		Anova	model.00	4	40.544	46.649	-16.272	32.544	model.01	5	42.032	49.664	-16.016	32.032	0.5114	1	0.4745	nsig	X206.0458_7.3	nHILIC	[M-H]-		4-(2-Aminophenyl)-2,4-dioxobutanoic acid	HMDB0000978	C01252	3
Single_Model	314.075	-0.431983	0.373409	-1.15686	0.247328		Anova	model.00	4	40.544	46.649	-16.272	32.544	model.01	5	41.042	48.674	-15.521	31.042	1.5015	1	0.2204	nsig	X314.0746_11	pHILIC	[M+H]+		Phosphoribosylformylglycineamidine	HMDB0000999	C04640	3
Single_Model	193.096	-0.348738	0.264401	-1.31897	0.187178		Anova	model.00	4	40.544	46.649	-16.272	32.544	model.01	5	40.632	48.264	-15.316	30.632	1.9118	1	0.1668	nsig	X193.0963_3.1	pRPLC	[M+H]+		Oxoamide	HMDB0001004	NA	3
Single_Model	298.069	0.565186	0.55886	1.01132	0.311864		Anova	model.00	4	40.544	46.649	-16.272	32.544	model.01	5	41.509	49.141	-15.754	31.509	1.0349	1	0.309	nsig	X298.0687_0.7	nRPLC	[M-H]-		D-4'-Phosphopantothenate	HMDB0001016	C03492	3
Single_Model	535.037	2.70416	1.48304	1.82339	0.0682442		Anova	model.00	4	40.544	46.649	-16.2718	32.544	model.01	5	29.743	37.375	-9.8717	19.743	12.8	1	0.0003466	nsig	X535.037_11	nHILIC	[M-H]-		UDP-D-Xylose	HMDB0001018	C00190	3
Single_Model	249.055	-0.0843303	0.303021	-0.278299	0.780783		Anova	model.00	4	40.544	46.649	-16.272	32.544	model.01	5	42.465	50.097	-16.233	32.465	0.0782	1	0.7797	nsig	X249.0547_0.9	nRPLC	[M-H]-		gamma-Glutamylcysteine	HMDB0001049	C00669	3
Single_Model	300.049	0.758174	0.77855	0.973827	0.330142		Anova	model.00	4	40.544	46.649	-16.272	32.544	model.01	5	41.332	48.963	-15.666	31.332	1.2121	1	0.2709	nsig	X300.0487_11.6	nHILIC	[M-H]-		N-Acetyl-D-Glucosamine 6-Phosphate	HMDB0001062	C00357	3
Single_Model	303.083	-0.367944	0.304747	-1.20737	0.227288		Anova	model.00	4	40.544	46.649	-16.272	32.544	model.01	5	40.973	48.605	-15.487	30.973	1.5705	1	0.2101	nsig	X303.0828_0.6	nRPLC	[M-H]-		N-Acetylaspartylglutamic acid	HMDB0001067	C12270	3
Single_Model	590.089	1.07489	0.744689	1.4434	0.148907		Anova	model.00	4	40.544	46.649	-16.272	32.544	model.01	5	38.523	46.155	-14.261	28.523	4.0209	1	0.04494	nsig	X590.0893_11.4	pHILIC	[M+H]+		GDP-L-fucose	HMDB0001095	C00325	3
Single_Model	219.099	-0.508822	0.529679	-0.960623	0.336742		Anova	model.00	4	40.544	46.649	-16.272	32.544	model.01	5	41.487	49.119	-15.743	31.487	1.0567	1	0.304	nsig	X219.0985_8.4	nHILIC	[M-H]-		N-Acetyl-b-glucosaminylamine	HMDB0001104	C01239	3
Single_Model	297.107	-0.563379	0.609752	-0.923947	0.355514		Anova	model.00	4	40.544	46.649	-16.272	32.544	model.01	5	41.633	49.265	-15.816	31.633	0.9106	1	0.34	nsig	X297.1067_7.1	nRPLC	[M-H]-		7-Methylguanosine	HMDB0001107	NA	3
Single_Model	258.038	0.14523	0.380429	0.381753	0.702644		Anova	model.00	4	40.544	46.649	-16.272	32.544	model.01	5	42.385	50.017	-16.192	32.385	0.1586	1	0.6904	nsig	X258.0382_10.8	nHILIC	[M-H]-		Glucosamine-1P	HMDB0001109	C06156	3
Single_Model	136.04	-0.137418	0.502287	-0.273585	0.784403		Anova	model.00	4	40.544	46.649	-16.272	32.544	model.01	5	42.468	50.1	-16.234	32.468	0.0753	1	0.7838	nsig	X136.0404_2.2	nHILIC	[M-H]-		Anthranilic acid	HMDB0001123	C00108	1
Single_Model	336.051	0.271308	0.237574	1.14199	0.253457		Anova	model.00	4	40.544	46.649	-16.272	32.544	model.01	5	41.064	48.695	-15.532	31.064	1.4801	1	0.2238	nsig	X336.0506_11.9	nHILIC	[M-H]-		Nicotinic acid mononucleotide	HMDB0001132	C01185	3
Single_Model	188.056	0.169161	0.365988	0.462205	0.643934		Anova	model.00	4	40.544	46.649	-16.272	32.544	model.01	5	42.317	49.949	-16.159	32.317	0.2267	1	0.634	nsig	X188.0564_10.2	nHILIC	[M-H]-	0.820065	N-Acetyl-L-glutamic acid	HMDB0001138	C00624	2
Single_Model	110.06	-0.36252	0.520763	-0.696132	0.486346		Anova	model.00	4	40.544	46.649	-16.272	32.544	model.01	5	42.018	49.65	-16.009	32.018	0.5257	1	0.4684	nsig	X110.0601_6.3	pHILIC	[M+H]+	0.669089	4-Aminophenol	HMDB0001169	C02372	2
Single_Model	298.097	0.533894	0.0149997	35.5937	1.76e-277		Anova	model.00	4	40.544	46.649	-16.272	32.544	model.01	5	39.169	46.8	-14.584	29.169	3.375	1	0.06619	nsig	X298.0966_1.5	pHILIC	[M+H]+	0.772115	5'-Deoxy-5'-(methylthio)adenosine	HMDB0001173	C00170	1
Single_Model	613.141	0.958361	0.773465	1.23905	0.215328		Anova	model.00	4	40.544	46.649	-16.272	32.544	model.01	5	39.568	47.199	-14.784	29.568	2.976	1	0.08451	nsig	X613.1413_10.9	nHILIC	[M-H]-		Cytidine monophosphate N-acetylneuraminic acid	HMDB0001176	C00128	3
Single_Model	558.063	0.680869	0.682322	0.99787	0.318342		Anova	model.00	4	40.544	46.649	-16.272	32.544	model.01	5	41.573	49.205	-15.787	31.573	0.9705	1	0.3246	nsig	X558.0631_0.9	nRPLC	[M-H]-		Adenosine diphosphate ribose	HMDB0001178	C00301	3
Single_Model	230.067	0.544579	0.461036	1.18121	0.23752		Anova	model.00	4	40.544	46.649	-16.272	32.544	model.01	5	39.965	47.597	-14.983	29.965	2.5783	1	0.1083	nsig	X230.0669_11	nHILIC	[M-H]-		N2-Succinyl-L-glutamic acid 5-semialdehyde	HMDB0001180	C05932	3
Single_Model	85.0647	-0.652692	0.724017	-0.901487	0.367329		Anova	model.00	4	40.544	46.649	-16.272	32.544	model.01	5	41.71	49.342	-15.855	31.71	0.8336	1	0.3612	nsig	X85.0647_0.8	pRPLC	[M+H]+		Methyl propenyl ketone	HMDB0001184	NA	3
Single_Model	399.144	0.619817	0.645679	0.959946	0.337083		Anova	model.00	4	40.544	46.649	-16.272	32.544	model.01	5	41.427	49.059	-15.714	31.427	1.1166	1	0.2907	nsig	X399.1442_14.2	pHILIC	[M+H]+	0.832517	S-Adenosylmethionine (SAM)	HMDB0001185	C00019	2
Single_Model	158.061	-1.41809	1.04562	-1.35621	0.175031		Anova	model.00	4	40.544	46.649	-16.272	32.544	model.01	5	40.61	48.242	-15.305	30.61	1.9332	1	0.1644	nsig	X158.0607_1.4	nRPLC	[M-H]-	0.821583	Indoleacetaldehyde	HMDB0001190	C00637	2
Single_Model	231.099	-0.0620842	0.363453	-0.170818	0.864367		Anova	model.00	4	40.544	46.649	-16.272	32.544	model.01	5	42.514	50.146	-16.257	32.514	0.0293	1	0.8641	nsig	X231.0985_8	nHILIC	[M-H]-		N2-Succinyl-L-ornithine	HMDB0001199	C03415	3
Single_Model	444.031	1.21999	0.887998	1.37387	0.169482		Anova	model.00	4	40.544	46.649	-16.272	32.544	model.01	5	39.772	47.404	-14.886	29.772	2.7719	1	0.09593	nsig	X444.0312_11.4	pHILIC	[M+H]+		Guanosine diphosphate	HMDB0001201	C00035	3
Single_Model	351.217	-0.0156695	0.2678	-0.0585121	0.953341		Anova	model.00	4	40.544	46.649	-16.272	32.544	model.01	5	42.54	50.172	-16.27	32.54	0.0034	1	0.9532	nsig	X351.2173_8.3	nRPLC	[M-H]-		Prostaglandin E2	HMDB0001220	C00584	3		****	Remove
Single_Model	333.207	0.643986	0.76668	0.839966	0.400927		Anova	model.00	4	40.544	46.649	-16.272	32.544	model.01	5	41.825	49.457	-15.912	31.825	0.7187	1	0.3966	nsig	X333.207_1.1	nHILIC	[M-H]-		15-Keto-13,14-dihydroprostaglandin A2	HMDB0001244	NA	3
Single_Model	784.149	0.15748	0.246037	0.640064	0.522131		Anova	model.00	4	40.544	46.649	-16.272	32.544	model.01	5	42.113	49.744	-16.056	32.113	0.431	1	0.5115	nsig	X784.1494_6.3	nRPLC	[M-H]-		FAD	HMDB0001248	C00016	3
Single_Model	146.165	-0.219737	0.259863	-0.845588	0.397783		Anova	model.00	4	40.544	46.649	-16.272	32.544	model.01	5	41.803	49.435	-15.902	31.803	0.7406	1	0.3895	nsig	X146.1652_6.3	pHILIC	[M+H]+		Spermidine	HMDB0001257	C00315	3
Single_Model	173.009	0.765244	0.836553	0.914759	0.360318		Anova	model.00	4	40.544	46.649	-16.272	32.544	model.01	5	41.642	49.274	-15.821	31.642	0.9019	1	0.3423	nsig	X173.009_10.4	nHILIC	[M-H]-	0.847907	Dehydroascorbic acid	HMDB0001264	C00425	1
Single_Model	243.027	-0.190335	0.360466	-0.528026	0.597481		Anova	model.00	4	40.544	46.649	-16.272	32.544	model.01	5	42.254	49.885	-16.127	32.254	0.29	1	0.5902	nsig	X243.0273_8.7	nHILIC	[M-H]-		Fucose 1-phosphate	HMDB0001265	C02985	3
Single_Model	189.16	0.944252	0.92195	1.02419	0.305745		Anova	model.00	4	40.544	46.649	-16.272	32.544	model.01	5	41.437	49.069	-15.719	31.437	1.1064	1	0.2929	nsig	X189.1597_18.3	pHILIC	[M+H]+	0.830722	N6,N6,N6-Trimethyl-L-lysine	HMDB0001325	C03793	1
Single_Model	317.212	2.24643	1.27419	1.76303	0.077895		Anova	model.00	4	40.544	46.649	-16.272	32.544	model.01	5	32.441	40.072	-11.22	22.441	10.103	1	0.00148	nsig	X317.2119_0.9	nHILIC	[M-H]-		Leukotriene A4	HMDB0001337	C00909	3
Single_Model	285.22	0.182747	0.936689	0.195099	0.845315		Anova	model.00	4	40.544	46.649	-16.272	32.544	model.01	5	42.506	50.138	-16.253	32.506	0.0372	1	0.847	nsig	X285.22_11.3	pRPLC	[M+H]+		Retinal	HMDB0001358	C00376	3
Single_Model	362.05	-0.220012	0.61271	-0.35908	0.719535		Anova	model.00	4	40.544	46.649	-16.272	32.544	model.01	5	42.412	50.044	-16.206	32.412	0.132	1	0.7164	nsig	X362.0505_12.7	nHILIC	[M-H]-	0.79491	GMP	HMDB0001397	C00144	2
Single_Model	123.055	-0.492788	1.2415	-0.396931	0.691418		Anova	model.00	4	40.544	46.649	-16.272	32.544	model.01	5	42.373	50.005	-16.187	32.373	0.1702	1	0.6799	nsig	X123.0553_1.1	pHILIC	[M+H]+	0.829976	Niacinamide	HMDB0001406	C00153	1
Single_Model	315.119	0.517162	0.464018	1.11453	0.265052		Anova	model.00	4	40.544	46.649	-16.272	32.544	model.01	5	41.191	48.822	-15.595	31.191	1.353	1	0.2448	nsig	X315.1194_7.8	pRPLC	[M+H]+		7,8-Dihydropteroic acid	HMDB0001412	C00921	3
Single_Model	98.9841	-0.0478446	0.97553	-0.0490447	0.960884		Anova	model.00	4	40.544	46.649	-16.272	32.544	model.01	5	42.541	50.173	-16.271	32.541	0.0024	1	0.9609	nsig	X98.9841_15	pHILIC	[M+H]+	0.772966	Ortophosphate	HMDB0001429	C00009	2
Single_Model	365.051	-0.586903	0.388392	-1.51111	0.130761		Anova	model.00	4	40.544	46.649	-16.272	32.544	model.01	5	39.669	47.301	-14.835	29.669	2.8742	1	0.09001	nsig	X365.0511_10	nHILIC	[M-H]-		Phosphoribosyl formamidocarboxamide	HMDB0001439	C04734	3
Single_Model	212.043	-0.879882	0.341234	-2.57853	0.0099221		Anova	model.00	4	40.544	46.649	-16.272	32.544	model.01	5	39.9	47.532	-14.95	29.9	2.6439	1	0.1039	nsig	X212.0431_11.9	pHILIC	[M-H]-		Phosphocreatine	HMDB0001511	C02305	2
Single_Model	277.144	-0.853035	0.635496	-1.34231	0.179494		Anova	model.00	4	40.544	46.649	-16.272	32.544	model.01	5	40.405	48.036	-15.202	30.405	2.139	1	0.1436	nsig	X277.1444_1.1	nHILIC	[M-H]-		alpha-CEHC	HMDB0001518	NA	3
Single_Model	261.038	-1.31749	0.735775	-1.79062	0.073354		Anova	model.00	4	40.544	46.649	-16.272	32.544	model.01	5	36.003	43.635	-13.002	26.003	6.5403	1	0.01055	nsig	X261.0378_4.3	nRPLC	[M-H]-		Mannitol 1-phosphate	HMDB0001530	C00644	3
Single_Model	404.026	0.069019	0.265848	0.259618	0.795158		Anova	model.00	4	40.544	46.649	-16.272	32.544	model.01	5	42.476	50.108	-16.238	32.476	0.0676	1	0.7949	nsig	X404.0263_0.9	pRPLC	[M+H]+		CDP	HMDB0001546	C00112	3
Single_Model	247.049	0.0245478	0.313915	0.0781988	0.93767		Anova	model.00	4	40.544	46.649	-16.272	32.544	model.01	5	42.538	50.169	-16.269	32.538	0.0061	1	0.9376	nsig	X247.0495_0.6	nRPLC	[M-H]-		Pyridoxamine 5'-phosphate	HMDB0001555	C00647	3
Single_Model	296.1	0.365679	0.265412	1.37778	0.168272		Anova	model.00	4	40.544	46.649	-16.272	32.544	model.01	5	40.145	47.777	-15.072	30.145	2.3986	1	0.1214	nsig	X296.0998_4.9	nHILIC	[M-H]-		1-Methylguanosine	HMDB0001563	C04545	3
Single_Model	195.088	0.0347199	0.395265	0.0878397	0.930004		Anova	model.00	4	40.544	46.649	-16.272	32.544	model.01	5	42.536	50.168	-16.268	32.536	0.0077	1	0.93	nsig	X195.0877_4.8	pHILIC	[M+H]+		Caffeine	HMDB0001847	C07481	1
Single_Model	419.188	0.0868493	0.332043	0.261561	0.79366		Anova	model.00	4	40.544	46.649	-16.272	32.544	model.01	5	42.473	50.104	-16.236	32.473	0.0711	1	0.7897	nsig	X419.188_12.7	pHILIC	[M+H]+		Lofepramine	HMDB0001848	C07049	3
Single_Model	150.056	-1.6847	1.52549	-1.10437	0.269432		Anova	model.00	4	40.544	46.649	-16.272	32.544	model.01	5	40.096	47.727	-15.048	30.096	2.448	1	0.1177	nsig	X150.056_2.9	nHILIC	[M-H]-	0.804324	Acetominophen	HMDB0001859	C06804	2
Single_Model	289.072	-0.173776	0.432111	-0.402156	0.687569		Anova	model.00	4	40.544	46.649	-16.272	32.544	model.01	5	42.382	50.014	-16.191	32.382	0.1615	1	0.6878	nsig	X289.072_6.1	nHILIC	[M-H]-		Epicatechin	HMDB0001871	C09727	3
Single_Model	87.045	0.745709	0.472857	1.57703	0.114789		Anova	model.00	4	40.544	46.649	-16.272	32.544	model.01	5	39.836	47.468	-14.918	29.836	2.7076	1	0.09987	nsig	X87.045_2	nRPLC	[M-H]-	0.791839	Isobutyric acid	HMDB0001873	C02632	2
Single_Model	264.053	-0.570029	0.757551	-0.752463	0.451773		Anova	model.00	4	40.544	46.649	-16.272	32.544	model.01	5	41.957	49.589	-15.979	31.957	0.5862	1	0.4439	nsig	X264.0534_0.9	pRPLC	[M+H]+		Epinephrine sulfate	HMDB0001876	NA	3
Single_Model	165.042	-0.245405	0.40553	-0.605145	0.545083		Anova	model.00	4	40.544	46.649	-16.272	32.544	model.01	5	42.171	49.803	-16.085	32.171	0.3729	1	0.5414	nsig	X165.0418_1.8	nHILIC	[M-H]-	0.675253	3-Methylxanthine	HMDB0001886	C16357	2
Single_Model	343.102	-0.197079	0.259529	-0.759373	0.44763		Anova	model.00	4	40.544	46.649	-16.272	32.544	model.01	5	41.947	49.579	-15.974	31.947	0.5965	1	0.4399	nsig	X343.1017_2.6	nHILIC	[M-H]-		Clotrimazole	HMDB0001922	C06922	3
Single_Model	232.166	0.221549	0.256748	0.862905	0.38819		Anova	model.00	4	40.544	46.649	-16.272	32.544	model.01	5	41.726	49.358	-15.863	31.726	0.8177	1	0.3659	nsig	X232.1656_8.5	pHILIC	[M+H]+		Gamma-Aminobutyryl-lysine	HMDB0001959	NA	3
Single_Model	167.056	0.232516	0.218777	1.0628	0.287873		Anova	model.00	4	40.544	46.649	-16.272	32.544	model.01	5	41.314	48.946	-15.657	31.314	1.2292	1	0.2676	nsig	X167.0563_1.9	pHILIC	[M+H]+	0.710026	7-Methylxanthine	HMDB0001991	C16353	2
Single_Model	301.217	1.48496	1.00856	1.47236	0.140923		Anova	model.00	4	40.544	46.649	-16.272	32.544	model.01	5	39.209	46.84	-14.604	29.209	3.335	1	0.06782	nsig	X301.2169_11.2	nRPLC	[M-H]-	0.815292	C20:5 FA (Eicosapentanoic acid)	HMDB0001999	C06428	2
Single_Model	249.113	-0.910688	0.742693	-1.2262	0.220124		Anova	model.00	4	40.544	46.649	-16.272	32.544	model.01	5	40.669	48.301	-15.334	30.669	1.8748	1	0.1709	nsig	X249.1128_7.6	nRPLC	[M-H]-		Ubiquinone-1	HMDB0002012	C00399	3
Single_Model	127.05	-2.83594	1.97355	-1.43698	0.150725		Anova	model.00	4	40.544	46.649	-16.272	32.544	model.01	5	37.529	45.161	-13.765	27.529	5.0142	1	0.02514	nsig	X127.0502_9	pHILIC	[M+H]+		4-Imidazoleacetic acid	HMDB0002024	C02835	1
Single_Model	163.04	-1.31884	0.826343	-1.59599	0.11049		Anova	model.00	4	40.544	46.649	-16.272	32.544	model.01	5	38.896	46.528	-14.448	28.896	3.6478	1	0.05614	nsig	X163.0401_2.4	nHILIC	[M-H]-	0.743305	p-Coumaric acid	HMDB0002035	C00811	2
Single_Model	82.9542	-0.478208	0.346378	-1.38059	0.167404		Anova	model.00	4	40.544	46.649	-16.272	32.544	model.01	5	40.529	48.16	-15.264	30.529	2.0151	1	0.1557	nsig	X82.9542_2.6	nHILIC	[M-H]-		Chloric acid	HMDB0002036	C01485	3
Single_Model	86.06	-1.21526	0.76074	-1.59747	0.110162		Anova	model.00	4	40.544	46.649	-16.272	32.544	model.01	5	38.734	46.366	-14.367	28.734	3.8098	1	0.05095	nsig	X86.06_1.8	pHILIC	[M+H]+		2-Pyrrolidinone	HMDB0002039	C11118	3
Single_Model	235.119	-0.156447	0.579924	-0.269771	0.787336		Anova	model.00	4	40.544	46.649	-16.272	32.544	model.01	5	42.47	50.102	-16.235	32.47	0.0733	1	0.7866	nsig	X235.1189_1.8	pHILIC	[M+H]+		Cyclo(his-pro)	HMDB0002053	NA	3
Single_Model	221.082	-0.80954	0.509246	-1.58968	0.111906		Anova	model.00	4	40.544	46.649	-16.272	32.544	model.01	5	39.422	47.054	-14.711	29.422	3.1214	1	0.07727	nsig	X221.0819_1.3	nHILIC	[M-H]-		Monoisobutyl phthalic acid	HMDB0002056	NA	3
Single_Model	215.165	-0.307244	0.569015	-0.539958	0.589226		Anova	model.00	4	40.544	46.649	-16.272	32.544	model.01	5	42.237	49.868	-16.118	32.237	0.307	1	0.5795	nsig	X215.165_9.2	nRPLC	[M-H]-	0.686281	C12:0, OH FA (Hydroxydodecanoic acid)	HMDB0002059	C08317	2
Single_Model	131.118	0.389025	0.325847	1.19389	0.232521		Anova	model.00	4	40.544	46.649	-16.272	32.544	model.01	5	41.039	48.671	-15.52	31.039	1.5047	1	0.2199	nsig	X131.1179_7.3	pHILIC	[M+H]+	0.765308	N-Acetylputrescine	HMDB0002064	C02714	2
Single_Model	129.019	-1.28483	1.50588	-0.853212	0.393542		Anova	model.00	4	40.544	46.649	-16.272	32.544	model.01	5	41.586	49.218	-15.793	31.586	0.9576	1	0.3278	nsig	X129.0193_2.3	nHILIC	[M-H]-	0.711028	Itaconic acid	HMDB0002092	C00490	1
Single_Model	150.077	-0.23639	0.343731	-0.687719	0.491629		Anova	model.00	4	40.544	46.649	-16.272	32.544	model.01	5	42.064	49.695	-16.032	32.064	0.4801	1	0.4884	nsig	X150.0774_2	pHILIC	[M+H]+		6-Methyladenine	HMDB0002099	C08434	3
Single_Model	165.019	-0.64085	0.577387	-1.10991	0.267036		Anova	model.00	4	40.544	46.649	-16.272	32.544	model.01	5	41.242	48.873	-15.621	31.242	1.3021	1	0.2538	nsig	X165.0193_6.2	nHILIC	[M-H]-		Phthalic acid	HMDB0002107	C01606	3
Single_Model	220.028	0.390796	0.457323	0.854531	0.392811		Anova	model.00	4	40.544	46.649	-16.272	32.544	model.01	5	41.781	49.413	-15.89	31.781	0.7629	1	0.3824	nsig	X220.0284_5.2	nHILIC	[M-H]-		S-(3-oxo-3-carboxy-n-propyl)cysteine	HMDB0002135	NA	3
Single_Model	79.0211	-0.233899	0.312453	-0.74859	0.454104		Anova	model.00	4	40.544	46.649	-16.272	32.544	model.01	5	41.977	49.609	-15.989	31.977	0.5666	1	0.4516	nsig	X79.0211_0.5	pRPLC	[M+H]+		Dimethyl sulfoxide	HMDB0002151	C11143	3
Single_Model	286.14	-0.761828	0.601834	-1.26584	0.205569		Anova	model.00	4	40.544	46.649	-16.272	32.544	model.01	5	40.679	48.311	-15.339	30.679	1.8649	1	0.1721	nsig	X286.1396_11.2	pHILIC	[M+H]+		Glycylprolylhydroxyproline	HMDB0002171	NA	3
Single_Model	187.134	-1.84941	1.05615	-1.75109	0.079931		Anova	model.00	4	40.544	46.649	-16.272	32.544	model.01	5	37.235	44.867	-13.618	27.235	5.3082	1	0.02123	nsig	X187.1337_8.4	nRPLC	[M-H]-	0.721842	C10:0,OH FA (Hydroxycapric acid)	HMDB0002203	NA	2
Single_Model	241.087	-0.0198908	0.250908	-0.079275	0.936814		Anova	model.00	4	40.544	46.649	-16.272	32.544	model.01	5	42.537	50.169	-16.269	32.537	0.0063	1	0.9365	nsig	X241.0869_2.4	nHILIC	[M-H]-		Equol	HMDB0002209	C14131	3
Single_Model	149.096	-0.440914	0.621632	-0.709285	0.478148		Anova	model.00	4	40.544	46.649	-16.272	32.544	model.01	5	42.033	49.664	-16.016	32.033	0.5111	1	0.4747	nsig	X149.0959_8.8	pRPLC	[M+H]+		Cuminaldehyde	HMDB0002214	C06577	3
Single_Model	242.113	-0.0307531	0.214405	-0.143435	0.885947		Anova	model.00	4	40.544	46.649	-16.272	32.544	model.01	5	42.523	50.155	-16.262	32.523	0.0206	1	0.8859	nsig	X242.1134_8.8	pHILIC	[M+H]+		5-Methyldeoxycytidine	HMDB0002224	C03592	3
Single_Model	260.125	0.00146305	0.214739	0.00681317	0.994564		Anova	model.00	4	40.544	46.649	-16.272	32.544	model.01	5	42.544	50.175	-16.272	32.544	0	1	0.9946	nsig	X260.125_13.2	nHILIC	[M-H]-		Gamma glutamyl ornithine	HMDB0002248	NA	3
Single_Model	269.248	-1.48601	1.06787	-1.39157	0.164053		Anova	model.00	4	40.544	46.649	-16.272	32.544	model.01	5	40.23	47.862	-15.115	30.23	2.3136	1	0.1283	nsig	X269.2484_0.9	nHILIC	[M-H]-		C17:0 FA (Heptadecanoic acid)	HMDB0002259	NA	2
Single_Model	141.066	1.02135	0.541819	1.88504	0.0594247		Anova	model.00	4	40.544	46.649	-16.272	32.544	model.01	5	39.079	46.711	-14.54	29.079	3.4643	1	0.06271	nsig	X141.0658_8.4	pHILIC	[M+H]+	0.824208	Deamino-Histidine	HMDB0002271	C20522	1
Single_Model	366.139	-0.385323	0.35584	-1.08286	0.278873		Anova	model.00	4	40.544	46.649	-16.272	32.544	model.01	5	41.287	48.919	-15.643	31.287	1.2566	1	0.2623	nsig	X366.1392_8.9	pHILIC	[M+H]+		2-(acetylamino)-1,5-anhydro-2-deoxy-3-O-b-D-galactopyranosyl-D-arabino-Hex-1-enitol	HMDB0002278	NA	3
Single_Model	377.232	-0.602145	0.383635	-1.56958	0.116513		Anova	model.00	4	40.544	46.649	-16.272	32.544	model.01	5	39.7	47.332	-14.85	29.7	2.8436	1	0.09174	nsig	X377.232_2.2	pHILIC	[M+H]+		Resolvin D2	HMDB0002294	NA	3
Single_Model	243.16	0.160441	0.337112	0.475929	0.634125		Anova	model.00	4	40.544	46.649	-16.272	32.544	model.01	5	42.307	49.939	-16.154	32.307	0.2363	1	0.6269	nsig	X243.1601_9.3	nRPLC	[M-H]-	0.759241	C13:0,DC FA (Tridecanedicarboxylic acid)	HMDB0002327	NA	2
Single_Model	285.077	-0.159297	0.298522	-0.533618	0.593606		Anova	model.00	4	40.544	46.649	-16.272	32.544	model.01	5	42.257	49.888	-16.128	32.257	0.287	1	0.5922	nsig	X285.0766_3.5	pRPLC	[M+H]+		Biochanin A	HMDB0002338	C00814	3
Single_Model	349.202	0.505921	0.306552	1.65036	0.098869		Anova	model.00	4	40.544	46.649	-16.272	32.544	model.01	5	38.953	46.585	-14.476	28.953	3.5906	1	0.05811	nsig	X349.2021_9	nRPLC	[M-H]-		8-iso-15-keto-PGE2	HMDB0002341	NA	3
Single_Model	237.184	-0.173818	0.272361	-0.638189	0.52335		Anova	model.00	4	40.544	46.649	-16.272	32.544	model.01	5	42.117	49.749	-16.058	32.117	0.4266	1	0.5136	nsig	X237.1838_11	pHILIC	[M+H]+		Capsidiol	HMDB0002352	C09627	3
Single_Model	159.066	-0.0722336	0.779579	-0.0926572	0.926176		Anova	model.00	4	40.544	46.649	-16.272	32.544	model.01	5	42.535	50.167	-16.267	32.535	0.0086	1	0.9261	nsig	X159.0663_5.8	nHILIC	[M-H]-	0.704512	3,3-Dimethylglutaric acid	HMDB0002441	NA	2
Single_Model	581.118	-0.81109	0.610504	-1.32856	0.183994		Anova	model.00	4	40.544	46.649	-16.272	32.544	model.01	5	40.041	47.673	-15.02	30.041	2.5028	1	0.1136	nsig	X581.1179_6	nRPLC	[M-H]-		D-Galacturonic acid	HMDB0002545	C08348	3
Single_Model	512.267	0.0734142	0.285865	0.256814	0.797322		Anova	model.00	4	40.544	46.649	-16.272	32.544	model.01	5	42.478	50.11	-16.239	32.478	0.066	1	0.7973	nsig	X512.2674_9.9	nRPLC	[M-H]-		Sulfolithocholylglycine	HMDB0002639	C11301	3
Single_Model	163.04	-0.867192	1.00971	-0.858852	0.390422		Anova	model.00	4	40.544	46.649	-16.272	32.544	model.01	5	41.796	49.428	-15.898	31.796	0.7473	1	0.3873	nsig	X163.0401_7.9	nHILIC	[M-H]-	0.807319	2-Hydroxycinnamic acid	HMDB0002641	C01772	2
Single_Model	361.198	0.315269	0.476048	0.662264	0.507802		Anova	model.00	4	40.544	46.649	-16.272	32.544	model.01	5	42.049	49.681	-16.025	32.049	0.4943	1	0.482	nsig	X361.198_8.7	pHILIC	[M+H]+	0.760163	Cortisone	HMDB0002802	C00762	2
Single_Model	522.355	1.36384	0.814692	1.67406	0.0941187		Anova	model.00	4	40.544	46.649	-16.272	32.544	model.01	5	38.533	46.165	-14.267	28.533	4.0103	1	0.04522	nsig	X522.3552_6	pHILIC	[M+H]+	0.664506	LysoPC(18:1)	HMDB0002815	C04230	2
Single_Model	126.066	0.282306	0.406475	0.694523	0.487354		Anova	model.00	4	40.544	46.649	-16.272	32.544	model.01	5	42.047	49.679	-16.023	32.047	0.4967	1	0.4809	nsig	X126.0662_6.6	pHILIC	[M+H]+	0.800896	5-Methylcytosine	HMDB0002894	C02376	2
Single_Model	146.046	-0.597848	0.412538	-1.44919	0.147283		Anova	model.00	4	40.544	46.649	-16.272	32.544	model.01	5	40.186	47.818	-15.093	30.186	2.3574	1	0.1247	nsig	X146.0459_7.4	nHILIC	[M-H]-		N-Acetylserine	HMDB0002931	NA	1
Single_Model	230.096	0.170541	0.348088	0.489936	0.624179		Anova	model.00	4	40.544	46.649	-16.272	32.544	model.01	5	42.28	49.912	-16.14	32.28	0.2633	1	0.6078	nsig	X230.0957_11.2	pHILIC	[M+H]+		Ergothioneine	HMDB0003045	C05570	2
Single_Model	209.096	-1.7402	0.979835	-1.77602	0.0757301		Anova	model.00	4	40.544	46.649	-16.272	32.544	model.01	5	36.133	43.765	-13.066	26.133	6.4107	1	0.01134	nsig	X209.0959_1.4	pRPLC	[M+H]+		Chalcone	HMDB0003066	C15589	3
Single_Model	277.217	2.32094	1.56625	1.48184	0.138382		Anova	model.00	4	40.544	46.649	-16.272	32.544	model.01	5	38.775	46.407	-14.388	28.775	3.7684	1	0.05223	nsig	X277.2168_11.2	nRPLC	[M-H]-	0.750122	C18:3 FA (Linolenic acid)	HMDB0003073	C06426	2
Single_Model	373.189	-0.594808	0.792229	-0.750804	0.452771		Anova	model.00	4	40.544	46.649	-16.272	32.544	model.01	5	41.957	49.588	-15.978	31.957	0.587	1	0.4436	nsig	X373.1886_10	pRPLC	[M+H]+		Biocytin	HMDB0003134	C05552	3
Single_Model	398.341	0.102678	0.266913	0.384687	0.70047		Anova	model.00	4	40.544	46.649	-16.272	32.544	model.01	5	42.401	50.033	-16.201	32.401	0.1427	1	0.7056	nsig	X398.3414_1.8	pHILIC	[M+H]+		Solanidine	HMDB0003236	C06543	3
Single_Model	250.093	0.0462434	0.365219	0.126618	0.899242		Anova	model.00	4	40.544	46.649	-16.272	32.544	model.01	5	42.528	50.159	-16.264	32.528	0.016	1	0.8992	nsig	X250.0931_10.4	nHILIC	[M-H]-		Muramic acid	HMDB0003254	C06470	3
Single_Model	273.08	-0.261597	0.205092	-1.27551	0.202128		Anova	model.00	4	40.544	46.649	-16.272	32.544	model.01	5	40.749	48.381	-15.374	30.749	1.7948	1	0.1803	nsig	X273.08_0.9	nHILIC	[M-H]-	0.740366	Phloretin	HMDB0003306	C00774	2
Single_Model	255.065	-0.111912	0.984805	-0.113639	0.909524		Anova	model.00	4	40.544	46.649	-16.272	32.544	model.01	5	42.531	50.162	-16.265	32.531	0.013	1	0.9091	nsig	X255.065_8.1	pHILIC	[M+H]+		Daidzein	HMDB0003312	C10208	3
Single_Model	282.119	1.06857	0.00942678	113.355	0		Anova	model.00	4	40.544	46.649	-16.272	32.544	model.01	5	38.981	46.613	-14.491	28.981	3.5625	1	0.0591	nsig	X282.1193_6.9	pHILIC	[M+H]+	0.819934	N1-Methyladenosine	HMDB0003331	C02494	1
Single_Model	203.15	-0.245866	0.806014	-0.30504	0.760336		Anova	model.00	4	40.544	46.649	-16.272	32.544	model.01	5	42.449	50.081	-16.225	32.449	0.0944	1	0.7586	nsig	X203.1503_14.1	pHILIC	[M+H]+	0.863002	Symmetric dimethylarginine	HMDB0003334	NA	1
Single_Model	611.146	0.0938127	0.214768	0.436809	0.66225		Anova	model.00	4	40.544	46.649	-16.272	32.544	model.01	5	42.355	49.987	-16.177	32.355	0.1887	1	0.664	nsig	X611.1457_12.5	nHILIC	[M-H]-	0.745448	L-Glutathione oxidized	HMDB0003337	C00127	1
Single_Model	118.086	-0.315489	0.754594	-0.418091	0.67588		Anova	model.00	4	40.544	46.649	-16.272	32.544	model.01	5	42.353	49.985	-16.177	32.353	0.1904	1	0.6626	nsig	X118.0863_10.6	pHILIC	[M+H]+	0.812053	5-Aminovaleric acid	HMDB0003355	C00431	2
Single_Model	628.253	-0.218894	0.356558	-0.613909	0.539276		Anova	model.00	4	40.544	46.649	-16.272	32.544	model.01	5	42.159	49.791	-16.08	32.159	0.3843	1	0.5353	nsig	X628.2532_8.2	pRPLC	[M+H]+		Chitin	HMDB0003362	C00461	3
Single_Model	146.092	-0.427304	0.363768	-1.17466	0.240131		Anova	model.00	4	40.544	46.649	-16.272	32.544	model.01	5	41.056	48.687	-15.528	31.056	1.488	1	0.2225	nsig	X146.0924_9.6	pHILIC	[M+H]+	0.760501	4-Guanidinobutanoic acid	HMDB0003464	C01035	1
Single_Model	200.031	-0.10205	0.228133	-0.447328	0.654638		Anova	model.00	4	40.544	46.649	-16.272	32.544	model.01	5	42.343	49.975	-16.172	32.343	0.2003	1	0.6545	nsig	X200.0315_4.6	pRPLC	[M+H]+		O-Phosphohomoserine	HMDB0003484	C01102	3
Single_Model	215.139	-0.448993	0.540397	-0.830859	0.406054		Anova	model.00	4	40.544	46.649	-16.272	32.544	model.01	5	41.839	49.471	-15.919	31.839	0.7046	1	0.4012	nsig	X215.1389_1.6	pHILIC	[M+H]+		Dethiobiotin	HMDB0003581	C01909	3
Single_Model	217.083	0.180687	0.331052	0.545796	0.585206		Anova	model.00	4	40.544	46.649	-16.272	32.544	model.01	5	42.245	49.877	-16.122	32.245	0.2988	1	0.5846	nsig	X217.0829_11.6	nHILIC	[M-H]-		Glutamylalanine	HMDB0003764	NA	3
Single_Model	325.114	-0.754553	0.50831	-1.48443	0.137694		Anova	model.00	4	40.544	46.649	-16.272	32.544	model.01	5	39.86	47.491	-14.93	29.86	2.684	1	0.1014	nsig	X325.1138_9.2	nHILIC	[M-H]-		6,7-Dimethyl-8-(1-D-ribityl)lumazine	HMDB0003826	C04332	3
Single_Model	274.141	-0.0485431	0.4821	-0.100691	0.919796		Anova	model.00	4	40.544	46.649	-16.272	32.544	model.01	5	42.534	50.165	-16.267	32.534	0.0101	1	0.92	nsig	X274.1407_8.1	nHILIC	[M-H]-		Epsilon-(gamma-Glutamyl)-lysine	HMDB0003869	NA	3
Single_Model	111.055	-1.33049	0.917997	-1.44934	0.147241		Anova	model.00	4	40.544	46.649	-16.272	32.544	model.01	5	39.436	47.068	-14.718	29.436	3.1072	1	0.07794	nsig	X111.0553_1.7	pHILIC	[M+H]+	0.79659	1-Acetylimidazole	HMDB0003905	C05130	2
Single_Model	198.112	-0.42366	0.578604	-0.73221	0.464041		Anova	model.00	4	40.544	46.649	-16.272	32.544	model.01	5	41.99	49.621	-15.995	31.99	0.5541	1	0.4566	nsig	X198.1124_8.7	pHILIC	[M+H]+		Metanephrine	HMDB0004063	C05588	3
Single_Model	589.301	0.11245	0.275508	0.408154	0.683161		Anova	model.00	4	40.544	46.649	-16.272	32.544	model.01	5	42.375	50.007	-16.188	32.375	0.1682	1	0.6818	nsig	X589.3013_7.1	nRPLC	[M-H]-		D-Urobilinogen	HMDB0004158	C05791	3
Single_Model	125.071	-0.77626	0.603466	-1.28634	0.198326		Anova	model.00	4	40.544	46.649	-16.272	32.544	model.01	5	40.434	48.066	-15.217	30.434	2.1094	1	0.1464	nsig	X125.0709_1.5	pHILIC	[M+H]+		Methylimidazole acetaldehyde	HMDB0004181	C05827	3
Single_Model	247.072	-0.122241	0.232596	-0.52555	0.599201		Anova	model.00	4	40.544	46.649	-16.272	32.544	model.01	5	42.234	49.866	-16.117	32.234	0.3092	1	0.5782	nsig	X247.0723_5.7	nHILIC	[M-H]-		5-Hydroxyindoleacetylglycine	HMDB0004185	C05832	3
Single_Model	83.0251	-1.12328	0.745653	-1.50644	0.131955		Anova	model.00	4	40.544	46.649	-16.272	32.544	model.01	5	38.992	46.624	-14.496	28.992	3.5518	1	0.05948	nsig	X83.0251_9.7	nHILIC	[M-H]-		Imidazolone	HMDB0004363	C06195	3
Single_Model	106.086	-0.192053	0.35985	-0.533704	0.593546		Anova	model.00	4	40.544	46.649	-16.272	32.544	model.01	5	42.253	49.884	-16.126	32.253	0.2911	1	0.5895	nsig	X106.0863_7.6	pHILIC	[M+H]+		Diethanolamine	HMDB0004437	C06772	3
Single_Model	445.19	-0.0280935	0.334255	-0.0840483	0.933018		Anova	model.00	4	40.544	46.649	-16.272	32.544	model.01	5	42.537	50.168	-16.268	32.537	0.0071	1	0.933	nsig	X445.1899_2.6	nHILIC	[M-H]-	0.761177	Estrone glucuronide	HMDB0004483	C11133	2
Single_Model	215.115	-0.18697	0.912628	-0.20487	0.837673		Anova	model.00	4	40.544	46.649	-16.272	32.544	model.01	5	42.5	50.132	-16.25	32.5	0.0433	1	0.8352	nsig	X215.1149_9.5	nHILIC	[M-H]-		N-a-Acetyl-L-arginine	HMDB0004620	NA	3
Single_Model	297.112	-0.880773	0.633267	-1.39084	0.164274		Anova	model.00	4	40.544	46.649	-16.272	32.544	model.01	5	39.489	47.121	-14.744	29.489	3.055	1	0.08049	nsig	X297.1124_1.4	nRPLC	[M-H]-		7C-aglycone	HMDB0004808	NA	3
Single_Model	312.13	0.733824	0.475826	1.54221	0.123022		Anova	model.00	4	40.544	46.649	-16.272	32.544	model.01	5	38.416	46.048	-14.208	28.416	4.1275	1	0.04219	nsig	X312.1299_3.5	pHILIC	[M+H]+	0.667355	N2,N2-Dimethylguanosine	HMDB0004824	NA	2
Single_Model	144.102	-0.109057	0.866455	-0.125866	0.899838		Anova	model.00	4	40.544	46.649	-16.272	32.544	model.01	5	42.527	50.159	-16.264	32.527	0.0163	1	0.8985	nsig	X144.1019_6.9	pHILIC	[M+H]+	0.856967	Proline betaine	HMDB0004827	C10172	1
Single_Model	262.14	-0.142905	0.715814	-0.199641	0.841762		Anova	model.00	4	40.544	46.649	-16.272	32.544	model.01	5	42.503	50.135	-16.252	32.503	0.0402	1	0.841	nsig	X262.1399_13.3	pHILIC	[M+H]+	0.83419	.alpha.-L-Asp-L-Lys	HMDB0004987	NA	2
Single_Model	383.153	-0.492626	0.403232	-1.22169	0.221824		Anova	model.00	4	40.544	46.649	-16.272	32.544	model.01	5	40.892	48.524	-15.446	30.892	1.6515	1	0.1988	nsig	X383.1529_4.3	pHILIC	[M+H]+	0.697628	Loratadine	HMDB0005000	C06818	2
Single_Model	172.133	0.94435	0.740047	1.27607	0.201931		Anova	model.00	4	40.544	46.649	-16.272	32.544	model.01	5	40.706	48.338	-15.353	30.706	1.8376	1	0.1752	nsig	X172.1331_10.5	pHILIC	[M+H]+	0.791893	Gabapentin	HMDB0005015	NA	2
Single_Model	325.172	-0.259879	0.35117	-0.740038	0.459277		Anova	model.00	4	40.544	46.649	-16.272	32.544	model.01	5	41.938	49.57	-15.969	31.938	0.6057	1	0.4364	nsig	X325.1717_7	pRPLC	[M+H]+		Escitalopram	HMDB0005028	NA	3
Single_Model	358.122	-1.30536	0.848391	-1.53863	0.123894		Anova	model.00	4	40.544	46.649	-16.272	32.544	model.01	5	39.862	47.494	-14.931	29.862	2.6815	1	0.1015	nsig	X358.1219_11.2	pHILIC	[M+H]+		Rosiglitazone	HMDB0005031	NA	3
Single_Model	426.357	0.0192863	0.538833	0.0357928	0.971448		Anova	model.00	4	40.544	46.649	-16.272	32.544	model.01	5	42.542	50.174	-16.271	32.542	0.0013	1	0.9715	nsig	X426.3568_10.4	pRPLC	[M+H]+	0.819609	C18:1 AC (Oleoylcarnitine)	HMDB0005065	NA	2
Single_Model	359.278	-0.156234	0.378609	-0.412654	0.67986		Anova	model.00	4	40.544	46.649	-16.272	32.544	model.01	5	42.369	50	-16.184	32.369	0.175	1	0.6757	nsig	X359.2782_10.7	pRPLC	[M+H]+		13,14-Dihydro PGF-1a	HMDB0005076	NA	3
Single_Model	288.12	-0.147963	0.316619	-0.467322	0.640269		Anova	model.00	4	40.544	46.649	-16.272	32.544	model.01	5	42.322	49.954	-16.161	32.322	0.2212	1	0.6381	nsig	X288.1199_10.1	nHILIC	[M-H]-		Ophthalmic acid	HMDB0005765	C21016	3
Single_Model	255.145	0.0149383	0.612959	0.0243708	0.980557		Anova	model.00	4	40.544	46.649	-16.272	32.544	model.01	5	42.543	50.175	-16.271	32.543	0.0006	1	0.9806	nsig	X255.145_8	pHILIC	[M+H]+		Homoanserine	HMDB0005767	NA	3
Single_Model	338.182	1.24187	0.92061	1.34897	0.177348		Anova	model.00	4	40.544	46.649	-16.272	32.544	model.01	5	40.585	48.216	-15.292	30.585	1.959	1	0.1616	nsig	X338.182_10.7	pHILIC	[M+H]+	0.732475	Tyr-Arg	HMDB0005768	C02993	2
Single_Model	269.082	-0.332312	0.233593	-1.42261	0.15485		Anova	model.00	4	40.544	46.649	-16.272	32.544	model.01	5	40.242	47.874	-15.121	30.242	2.3012	1	0.1293	nsig	X269.0817_3	pRPLC	[M+H]+		Formononetin	HMDB0005808	C00858	3
Single_Model	284.088	-0.203593	0.310075	-0.656592	0.511443		Anova	model.00	4	40.544	46.649	-16.272	32.544	model.01	5	42.1	49.732	-16.05	32.1	0.4439	1	0.5053	nsig	X284.0884_6.9	nHILIC	[M-H]-		N4-Acetylcytidine	HMDB0005923	NA	3
Single_Model	173.057	-1.09485	0.645515	-1.69609	0.0898685		Anova	model.00	4	40.544	46.649	-16.272	32.544	model.01	5	38.142	45.774	-14.071	28.142	4.4015	1	0.03591	nsig	X173.0567_8.3	nHILIC	[M-H]-		N-Acetylasparagine	HMDB0006028	NA	1
Single_Model	187.072	-2.91296	1.75397	-1.66079	0.0967565		Anova	model.00	4	40.544	46.649	-16.272	32.544	model.01	5	37.687	45.319	-13.844	27.687	4.8562	1	0.02755	nsig	X187.0724_8.1	nHILIC	[M-H]-		N-Acetylglutamine	HMDB0006029	NA	1
Single_Model	337.044	0.140334	0.380787	0.368536	0.712474		Anova	model.00	4	40.544	46.649	-16.272	32.544	model.01	5	42.407	50.039	-16.203	32.407	0.1367	1	0.7115	nsig	X337.0441_8	nHILIC	[M-H]-		Imidazoleacetic acid ribotide	HMDB0006032	C04437	3
Single_Model	337.272	-0.164676	0.906737	-0.181613	0.855886		Anova	model.00	4	40.544	46.649	-16.272	32.544	model.01	5	42.511	50.143	-16.255	32.511	0.0329	1	0.8561	nsig	X337.2721_10.6	pRPLC	[M+H]+		Pregnanetriol	HMDB0006070	NA	3
Single_Model	284.029	0.0501054	0.314905	0.159113	0.87358		Anova	model.00	4	40.544	46.649	-16.272	32.544	model.01	5	42.518	50.15	-16.259	32.518	0.0255	1	0.873	nsig	X284.0289_0.9	nRPLC	[M-H]-		2-(Formamido)-N1-(5-phospho-D-ribosyl)acetamidine	HMDB0006211	C04640	3
Single_Model	121.065	0.643171	0.335886	1.91485	0.0555117		Anova	model.00	4	40.544	46.649	-16.272	32.544	model.01	5	38.354	45.986	-14.177	28.354	4.1898	1	0.04067	nsig	X121.0648_5.5	pHILIC	[M+H]+	0.764206	Phenylacetaldehyde	HMDB0006236	C00601	2
Single_Model	313.181	-0.329854	0.519637	-0.634777	0.525574		Anova	model.00	4	40.544	46.649	-16.272	32.544	model.01	5	42.128	49.76	-16.064	32.128	0.4158	1	0.519	nsig	X313.181_9.9	nRPLC	[M-H]-		4-oxo-Retinoic acid	HMDB0006285	C16678	3
Single_Model	263.103	-2.24993	1.62293	-1.38634	0.165644		Anova	model.00	4	40.544	46.649	-16.272	32.544	model.01	5	35.783	43.415	-12.892	25.783	6.7607	1	0.009319	nsig	X263.1035_5.9	nHILIC	[M-H]-	0.819295	Phenylacetyl-L-glutamine	HMDB0006344	C04148	2
Single_Model	200.128	0.127868	0.238976	0.535067	0.592603		Anova	model.00	4	40.544	46.649	-16.272	32.544	model.01	5	42.257	49.889	-16.128	32.257	0.2866	1	0.5924	nsig	X200.1277_0.6	pRPLC	[M+H]+		Ecgonine methyl ester	HMDB0006406	C12448	3
Single_Model	166.018	9.16855	5.50816	1.66454	0.0960047		Anova	model.00	4	40.544	46.649	-16.2718	32.544	model.01	5	29.369	37.001	-9.6844	19.369	13.175	1	0.0002837	nsig	X166.0179_5.7	nHILIC	[M-H]-	0.826653	Homocysteinesulfinic acid	HMDB0006462	NA	1
Single_Model	373.24	0.353652	0.385922	0.916384	0.359465		Anova	model.00	4	40.544	46.649	-16.272	32.544	model.01	5	41.662	49.293	-15.831	31.662	0.882	1	0.3477	nsig	X373.2402_10.8	nRPLC	[M-H]-		Calcitroic acid	HMDB0006472	NA	3
Single_Model	186.112	0.397451	0.5949	0.668097	0.504071		Anova	model.00	4	40.544	46.649	-16.272	32.544	model.01	5	42.069	49.7	-16.034	32.069	0.475	1	0.4907	nsig	X186.1124_7.9	pHILIC	[M+H]+	0.858851	Ecgonine	HMDB0006548	C10858	1
Single_Model	333.06	-0.486933	0.460547	-1.05729	0.290379		Anova	model.00	4	40.544	46.649	-16.272	32.544	model.01	5	41.38	49.012	-15.69	31.38	1.1637	1	0.2807	nsig	X333.0602_10.5	pHILIC	[M+H]+		dIMP	HMDB0006555	C06196	3
Single_Model	227.104	1.01194	0.742579	1.36273	0.172967		Anova	model.00	4	40.544	46.649	-16.272	32.544	model.01	5	40.277	47.909	-15.139	30.277	2.2665	1	0.1322	nsig	X227.1037_6	nHILIC	[M-H]-		Prolylhydroxyproline	HMDB0006695	NA	3
Single_Model	330.3	-0.436939	0.344566	-1.26809	0.204767		Anova	model.00	4	40.544	46.649	-16.272	32.544	model.01	5	40.739	48.37	-15.369	30.739	1.8051	1	0.1791	nsig	X330.3001_0.9	pHILIC	[M+H]+		Dihydroceramide	HMDB0006752	C12126	3
Single_Model	391.225	0.148378	0.4516	0.328561	0.742487		Anova	model.00	4	40.544	46.649	-16.272	32.544	model.01	5	42.437	50.069	-16.219	32.437	0.1065	1	0.7441	nsig	X391.2254_1.3	nHILIC	[M-H]-		CPA(16:0/0:0)	HMDB0007003	NA	3
Single_Model	419.257	0.0955704	0.252408	0.378634	0.70496		Anova	model.00	4	40.544	46.649	-16.272	32.544	model.01	5	42.402	50.034	-16.201	32.402	0.1417	1	0.7066	nsig	X419.2566_1.2	nHILIC	[M-H]-		CPA(18:0/0:0)	HMDB0007004	NA	3
Single_Model	437.268	-1.27468	1.01	-1.26207	0.206925		Anova	model.00	4	40.544	46.649	-16.272	32.544	model.01	5	40.441	48.072	-15.22	30.441	2.103	1	0.147	nsig	X437.2677_11.5	nRPLC	[M-H]-		LysoPA(18:0)	HMDB0007850	C00416	3
Single_Model	435.251	-0.241694	0.526857	-0.458747	0.646416		Anova	model.00	4	40.544	46.649	-16.272	32.544	model.01	5	42.327	49.959	-16.163	32.327	0.217	1	0.6414	nsig	X435.2506_13.7	nRPLC	[M-H]-		LysoPA(18:1)	HMDB0007851	C00416	3
Single_Model	433.235	0.386362	0.415046	0.93089	0.351911		Anova	model.00	4	40.544	46.649	-16.272	32.544	model.01	5	41.616	49.248	-15.808	31.616	0.9272	1	0.3356	nsig	X433.2346_13	nRPLC	[M-H]-		LysoPA(18:2)	HMDB0007852	C00416	3
Single_Model	326.088	-1.41173	0.970498	-1.45465	0.145766		Anova	model.00	4	40.544	46.649	-16.272	32.544	model.01	5	36.915	44.547	-13.457	26.915	5.6289	1	0.01767	nsig	X326.088_8.1	nHILIC	[M-H]-		Acetaminophen glucuronide	HMDB0010316	NA	3
Single_Model	468.307	0.806939	0.515289	1.56599	0.11735		Anova	model.00	4	40.544	46.649	-16.272	32.544	model.01	5	39.492	47.124	-14.746	29.492	3.0513	1	0.08067	nsig	X468.3071_10.2	pRPLC	[M+H]+		LysoPC(14:0)	HMDB0010379	C04230	2
Single_Model	466.291	0.752473	0.416272	1.80765	0.0706613		Anova	model.00	4	40.544	46.649	-16.272	32.544	model.01	5	38.381	46.013	-14.191	28.381	4.1626	1	0.04133	nsig	X466.2913_10.8	pRPLC	[M+H]+		LysoPC(14:1)	HMDB0010380	C04230	2
Single_Model	496.338	1.05112	0.628188	1.67325	0.094278		Anova	model.00	4	40.544	46.649	-16.272	32.544	model.01	5	39.024	46.655	-14.512	29.024	3.5201	1	0.06063	nsig	X496.3384_10.9	pRPLC	[M+H]+	0.771599	LysoPC(16:0)	HMDB0010382	C04230	2
Single_Model	494.323	1.36966	0.841019	1.62857	0.103403		Anova	model.00	4	40.544	46.649	-16.272	32.544	model.01	5	39.031	46.663	-14.516	29.031	3.5125	1	0.06091	nsig	X494.3226_10.5	pRPLC	[M+H]+		LysoPC(16:1)	HMDB0010383	C04230	2
Single_Model	550.385	0.545489	0.320022	1.70454	0.0882809		Anova	model.00	4	40.544	46.649	-16.272	32.544	model.01	5	38.454	46.086	-14.227	28.454	4.0892	1	0.04316	nsig	X550.3853_12	pRPLC	[M+H]+		LysoPC(20:1)	HMDB0010391	C04230	2
Single_Model	546.354	0.198421	0.612017	0.324209	0.74578		Anova	model.00	4	40.544	46.649	-16.272	32.544	model.01	5	42.438	50.07	-16.219	32.438	0.1055	1	0.7453	nsig	X546.3537_10.9	pRPLC	[M+H]+		LysoPC(20:3)	HMDB0010393	C04230	2
Single_Model	544.338	-0.814639	1.20217	-0.677643	0.497998		Anova	model.00	4	40.544	46.649	-16.272	32.544	model.01	5	42.059	49.691	-16.029	32.059	0.4847	1	0.4863	nsig	X544.3384_10.7	pRPLC	[M+H]+		LysoPC(20:4)	HMDB0010395	C04230	2
Single_Model	578.415	0.372144	0.34921	1.06567	0.286571		Anova	model.00	4	40.544	46.649	-16.272	32.544	model.01	5	40.846	48.478	-15.423	30.846	1.6974	1	0.1926	nsig	X578.4152_12.8	pRPLC	[M+H]+		LysoPC(22:1)	HMDB0010399	C04230	3
Single_Model	572.37	0.367426	0.272376	1.34896	0.177348		Anova	model.00	4	40.544	46.649	-16.272	32.544	model.01	5	40.524	48.156	-15.262	30.524	2.0199	1	0.1553	nsig	X572.3695_11.3	pRPLC	[M+H]+		LysoPC(22:4)	HMDB0010401	C04230	2
Single_Model	570.354	0.280238	0.294923	0.950206	0.342007		Anova	model.00	4	40.544	46.649	-16.272	32.544	model.01	5	41.553	49.185	-15.777	31.553	0.9902	1	0.3197	nsig	X570.3543_10.9	pRPLC	[M+H]+		LysoPC(22:5)	HMDB0010402	C04230	2
Single_Model	568.338	0.717696	0.518006	1.3855	0.165901		Anova	model.00	4	40.544	46.649	-16.272	32.544	model.01	5	40.432	48.064	-15.216	30.432	2.1112	1	0.1462	nsig	X568.3381_10.8	pRPLC	[M+H]+		LysoPC(22:6)	HMDB0010404	C04230	2
Single_Model	480.343	0.756746	0.519047	1.45795	0.144854		Anova	model.00	4	40.544	46.649	-16.272	32.544	model.01	5	40.151	47.783	-15.075	30.151	2.3926	1	0.1219	nsig	X480.3432_11.3	pRPLC	[M+H]+		LysoPC(P-16:0)	HMDB0010407	C04230	2
Single_Model	506.359	0.279016	0.36984	0.754424	0.450595		Anova	model.00	4	40.544	46.649	-16.272	32.544	model.01	5	41.95	49.582	-15.975	31.95	0.5932	1	0.4412	nsig	X506.3592_11.5	pRPLC	[M+H]+		LysoPC(P-18:1)	HMDB0010408	C04230	2
Single_Model	279.134	0.25125	0.400694	0.627036	0.530635		Anova	model.00	4	40.544	46.649	-16.272	32.544	model.01	5	42.052	49.684	-16.026	32.052	0.4916	1	0.4832	nsig	X279.1338_7.9	pHILIC	[M+H]+		N1-(alpha-D-ribosyl)-5,6-dimethyl-benzimidazole	HMDB0011112	C05775	3
Single_Model	482.323	0.869125	0.478713	1.81554	0.0694403		Anova	model.00	4	40.544	46.649	-16.272	32.544	model.01	5	37.781	45.413	-13.891	27.781	4.7623	1	0.02909	nsig	X482.3226_11.7	pRPLC	[M+H]+		LysoPE(18:0)	HMDB0011129	NA	2
Single_Model	218.186	0.0230945	0.147072	0.157028	0.875223		Anova	model.00	4	40.544	46.649	-16.272	32.544	model.01	5	42.519	50.151	-16.259	32.519	0.0246	1	0.8753	nsig	X218.1862_16.7	pHILIC	[M+H]+		Deoxyhypusine	HMDB0011150	NA	3
Single_Model	205.082	0.306618	0.465505	0.658678	0.510103		Anova	model.00	4	40.544	46.649	-16.272	32.544	model.01	5	41.872	49.503	-15.936	31.872	0.6721	1	0.4123	nsig	X205.0819_11.1	pHILIC	[M+H]+		L-beta-aspartyl-L-alanine	HMDB0011162	NA	3
Single_Model	249.072	0.0170321	0.445214	0.0382559	0.969484		Anova	model.00	4	40.544	46.649	-16.272	32.544	model.01	5	42.542	50.174	-16.271	32.542	0.0015	1	0.9695	nsig	X249.0716_11.9	pHILIC	[M+H]+		L-beta-aspartyl-L-aspartic acid	HMDB0011163	NA	3
Single_Model	245.114	0.401121	0.393601	1.01911	0.308153		Anova	model.00	4	40.544	46.649	-16.272	32.544	model.01	5	41.399	49.03	-15.699	31.399	1.1451	1	0.2846	nsig	X245.1141_10.4	nHILIC	[M-H]-		L-beta-aspartyl-L-leucine	HMDB0011166	NA	3
Single_Model	221.077	-0.380886	0.378615	-1.006	0.314416		Anova	model.00	4	40.544	46.649	-16.272	32.544	model.01	5	41.48	49.112	-15.74	31.48	1.0633	1	0.3025	nsig	X221.0767_11.1	pHILIC	[M+H]+		L-beta-aspartyl-L-serine	HMDB0011168	NA	3
Single_Model	233.078	6.78805	3.61634	1.87705	0.0605116		Anova	model.00	4	40.544	46.649	-16.2718	32.544	model.01	5	22.465	30.097	-6.2324	12.465	20.079	1	7.431e-06	nsig	X233.0777_11.4	nHILIC	[M-H]-		L-beta-aspartyl-L-threonine	HMDB0011169	NA	3
Single_Model	173.092	-0.576503	0.753276	-0.765327	0.444077		Anova	model.00	4	40.544	46.649	-16.272	32.544	model.01	5	41.903	49.535	-15.951	31.903	0.6409	1	0.4234	nsig	X173.0921_10.1	pHILIC	[M+H]+	0.690933	Pro-Gly	HMDB0011178	NA	2
Single_Model	263.139	0.13091	0.336389	0.389161	0.697157		Anova	model.00	4	40.544	46.649	-16.272	32.544	model.01	5	42.393	50.025	-16.197	32.393	0.1504	1	0.6981	nsig	X263.1389_5.8	pHILIC	[M+H]+		Prolylphenylalanine	HMDB0011179	NA	2
Single_Model	213.123	0.0824808	0.787962	0.104676	0.916633		Anova	model.00	4	40.544	46.649	-16.272	32.544	model.01	5	42.533	50.165	-16.266	32.533	0.0108	1	0.9173	nsig	X213.1233_10.5	pHILIC	[M+H]+		L-prolyl-L-proline	HMDB0011180	NA	3
Single_Model	438.262	0.25419	0.455327	0.558257	0.576669		Anova	model.00	4	40.544	46.649	-16.272	32.544	model.01	5	42.226	49.857	-16.113	32.226	0.318	1	0.5728	nsig	X438.2617_9.8	nRPLC	[M-H]-		LysoPE(15:0)	HMDB0011472	NA	2
Single_Model	452.277	1.01344	0.710164	1.42705	0.153565		Anova	model.00	4	40.544	46.649	-16.272	32.544	model.01	5	40.158	47.79	-15.079	30.158	2.3853	1	0.1225	nsig	X452.2773_10.9	nRPLC	[M-H]-	0.783321	LysoPE(16:0)	HMDB0011473	NA	2
Single_Model	478.291	0.432459	0.769032	0.562342	0.573883		Anova	model.00	4	40.544	46.649	-16.272	32.544	model.01	5	42.219	49.85	-16.109	32.219	0.3251	1	0.5686	nsig	X478.2915_10.7	pRPLC	[M+H]+		LysoPE(18:2)	HMDB0011477	NA	2
Single_Model	506.324	1.99334	1.12443	1.77276	0.0762684		Anova	model.00	4	40.544	46.649	-16.272	32.544	model.01	5	37.972	45.604	-13.986	27.972	4.5719	1	0.0325	nsig	X506.3241_11.1	nRPLC	[M-H]-		LysoPE(20:1)	HMDB0011482	NA	2
Single_Model	504.309	3.03484	1.59748	1.89977	0.0574638		Anova	model.00	4	40.544	46.649	-16.272	32.544	model.01	5	34.593	42.224	-12.296	24.593	7.9511	1	0.004806	nsig	X504.3091_10.7	nRPLC	[M-H]-		LysoPE(20:2)	HMDB0011483	NA	2
Single_Model	502.291	-0.491527	0.811691	-0.60556	0.544807		Anova	model.00	4	40.544	46.649	-16.272	32.544	model.01	5	42.176	49.808	-16.088	32.176	0.3678	1	0.5442	nsig	X502.2913_10.6	pRPLC	[M+H]+		LysoPE(20:4)	HMDB0011487	NA	2
Single_Model	498.262	0.326393	0.205327	1.58962	0.11192		Anova	model.00	4	40.544	46.649	-16.272	32.544	model.01	5	39.497	47.129	-14.749	29.497	3.0462	1	0.08092	nsig	X498.2616_10.4	nRPLC	[M-H]-		LysoPE(20:5)	HMDB0011489	NA	2
Single_Model	528.308	-1.59917	1.04605	-1.52877	0.126322		Anova	model.00	4	40.544	46.649	-16.272	32.544	model.01	5	38.968	46.6	-14.484	28.968	3.5752	1	0.05865	nsig	X528.3082_11.1	nRPLC	[M-H]-		LysoPE(22:4)	HMDB0011493	NA	2
Single_Model	528.307	-0.769149	0.792763	-0.970213	0.33194		Anova	model.00	4	40.544	46.649	-16.272	32.544	model.01	5	41.543	49.174	-15.771	31.543	1.0011	1	0.3171	nsig	X528.3066_10.8	pRPLC	[M+H]+		LysoPE(22:5)	HMDB0011494	NA	2
Single_Model	524.278	0.825957	0.784952	1.05224	0.29269		Anova	model.00	4	40.544	46.649	-16.272	32.544	model.01	5	41.272	48.904	-15.636	31.272	1.2717	1	0.2594	nsig	X524.278_10.7	nRPLC	[M-H]-		LysoPE(22:6)	HMDB0011496	NA	2
Single_Model	289.252	-0.407932	0.309406	-1.31844	0.187358		Anova	model.00	4	40.544	46.649	-16.272	32.544	model.01	5	40.392	48.024	-15.196	30.392	2.1513	1	0.1424	nsig	X289.2519_10.8	pRPLC	[M+H]+		All-trans-13,14-dihydroretinol	HMDB0011618	C15492	3
Single_Model	305.018	2.80894	1.54664	1.81616	0.0693456		Anova	model.00	4	40.544	46.649	-16.272	32.544	model.01	5	31.701	39.333	-10.851	21.701	10.843	1	0.0009919	nsig	X305.0179_7.7	nHILIC	[M-H]-		Uridine 2',3'-cyclic phosphate	HMDB0011640	C02355	3
Single_Model	255.11	0.168601	1.01037	0.166871	0.867471		Anova	model.00	4	40.544	46.649	-16.272	32.544	model.01	5	42.516	50.148	-16.258	32.516	0.0279	1	0.8674	nsig	X255.1097_9.5	nHILIC	[M-H]-		2-(3-Carboxy-3-aminopropyl)-L-histidine	HMDB0011655	C04441	3
Single_Model	336.071	-0.262638	0.314706	-0.834549	0.403972		Anova	model.00	4	40.544	46.649	-16.272	32.544	model.01	5	41.808	49.44	-15.904	31.808	0.7353	1	0.3912	nsig	X336.0712_1.4	nRPLC	[M-H]-		2,8-Dihydroxyquinoline-beta-D-glucuronide	HMDB0011658	NA	3
Single_Model	331.118	-0.822676	0.517604	-1.58939	0.111972		Anova	model.00	4	40.544	46.649	-16.272	32.544	model.01	5	38.31	45.942	-14.155	28.31	4.2333	1	0.03964	nsig	X331.118_9.9	pRPLC	[M+H]+		Aflatoxin B1 dialcohol	HMDB0011672	NA	3
Single_Model	304.034	0.23411	0.509396	0.459585	0.645814		Anova	model.00	4	40.544	46.649	-16.272	32.544	model.01	5	42.319	49.95	-16.159	32.319	0.225	1	0.6352	nsig	X304.0338_8.7	nHILIC	[M-H]-	0.748427	Cytidine 2',3'-cyclic monophosphoric acid	HMDB0011691	NA	2
Single_Model	209.046	0.0952663	0.412415	0.230996	0.817318		Anova	model.00	4	40.544	46.649	-16.272	32.544	model.01	5	42.49	50.122	-16.245	32.49	0.0532	1	0.8175	nsig	X209.0455_4.6	nRPLC	[M-H]-		Vanilpyruvic acid	HMDB0011714	NA	3
Single_Model	252.088	-0.625476	0.49349	-1.26745	0.204993		Anova	model.00	4	40.544	46.649	-16.272	32.544	model.01	5	40.502	48.134	-15.251	30.502	2.0412	1	0.1531	nsig	X252.0876_6.4	nHILIC	[M-H]-		N-Acetylvanilalanine	HMDB0011716	NA	3
Single_Model	309.109	-0.0683002	0.272694	-0.250465	0.802228		Anova	model.00	4	40.544	46.649	-16.272	32.544	model.01	5	42.48	50.112	-16.24	32.48	0.0636	1	0.8009	nsig	X309.1089_10.2	nHILIC	[M-H]-		gamma-Glutamyltyrosine	HMDB0011741	NA	3
Single_Model	215.106	-0.310265	0.37013	-0.838258	0.401886		Anova	model.00	4	40.544	46.649	-16.272	32.544	model.01	5	41.687	49.318	-15.843	31.687	0.8571	1	0.3545	nsig	X215.1063_7.6	pRPLC	[M+H]+		(+)-(1R,2R)-1,2-Diphenylethane-1,2-diol	HMDB0012111	C16015	3
Single_Model	207.065	0.0105148	0.276027	0.0380936	0.969613		Anova	model.00	4	40.544	46.649	-16.272	32.544	model.01	5	42.542	50.174	-16.271	32.542	0.0015	1	0.9696	nsig	X207.0655_4.5	nRPLC	[M-H]-		(R)-2-Benzylsuccinate	HMDB0012127	C09816	3
Single_Model	288.094	-0.0837454	0.162306	-0.515972	0.605874		Anova	model.00	4	40.544	46.649	-16.272	32.544	model.01	5	42.273	49.905	-16.137	32.273	0.2705	1	0.603	nsig	X288.0939_2.6	nHILIC	[M-H]-		2-Amino-4-oxo-6-(1',2',3'-trihydroxypropyl)-diquinoid-7,8-dihydroxypterin	HMDB0012144	C05253	3
Single_Model	153.031	-0.813568	0.777213	-1.04678	0.295203		Anova	model.00	4	40.544	46.649	-16.272	32.544	model.01	5	41.424	49.056	-15.712	31.424	1.1195	1	0.29	nsig	X153.0306_6	nHILIC	[M-H]-	0.652211	O,O-Diethyl phosphate	HMDB0012209	C06608	2
Single_Model	242.13	-0.289129	0.178675	-1.61818	0.105623		Anova	model.00	4	40.544	46.649	-16.272	32.544	model.01	5	40.156	47.788	-15.078	30.156	2.3879	1	0.1223	nsig	X242.1304_2	pHILIC	[M+H]+		Erythrohydrobupropion	HMDB0012227	NA	3
Single_Model	125.001	-0.278055	0.352497	-0.788817	0.430219		Anova	model.00	4	40.544	46.649	-16.272	32.544	model.01	5	41.898	49.53	-15.949	31.898	0.6459	1	0.4216	nsig	X125.0008_6.3	nHILIC	[M-H]-		Ethylphosphate	HMDB0012228	NA	3
Single_Model	324.289	1.87564	1.00958	1.85785	0.0631909		Anova	model.00	4	40.544	46.649	-16.272	32.544	model.01	5	32.525	40.156	-11.262	22.525	10.019	1	0.001549	nsig	X324.2886_11	pRPLC	[M+H]+		Linoleoyl ethanolamide	HMDB0012252	NA	3
Single_Model	291.118	0.266989	0.298903	0.89323	0.371734		Anova	model.00	4	40.544	46.649	-16.272	32.544	model.01	5	41.661	49.292	-15.83	31.661	0.8831	1	0.3474	nsig	X291.1179_0.8	pRPLC	[M+H]+		N-Succinyl-L,L-2,6-diaminopimelate	HMDB0012267	C04421	3
Single_Model	574.058	-0.305375	0.237612	-1.28518	0.198728		Anova	model.00	4	40.544	46.649	-16.272	32.544	model.01	5	40.851	48.483	-15.425	30.851	1.6927	1	0.1932	nsig	X574.0583_10.5	pHILIC	[M+H]+		phosphoribulosylformimino-AICAR-P	HMDB0012278	C04916	3
Single_Model	371.043	-0.847229	0.58768	-1.44165	0.149401		Anova	model.00	4	40.544	46.649	-16.272	32.544	model.01	5	38.735	46.367	-14.367	28.735	3.8088	1	0.05098	nsig	X371.0435_1	pRPLC	[M+H]+		(-)-Epicatechin sulfate	HMDB0012467	NA	3
Single_Model	297.055	-0.373512	0.43155	-0.865513	0.386757		Anova	model.00	4	40.544	46.649	-16.272	32.544	model.01	5	41.735	49.367	-15.868	31.735	0.8083	1	0.3686	nsig	X297.055_4.5	pRPLC	[M+H]+		1,4-Benzothiazine-O-quinonimine	HMDB0012491	NA	3
Single_Model	365.135	-5.70324	4.74982	-1.20073	0.229856		Anova	model.00	4	40.544	46.649	-16.272	32.544	model.01	5	34.217	41.849	-12.108	24.217	8.3267	1	0.003907	nsig	X365.1353_9.1	nHILIC	[M-H]-		1-(1,2,3,4,5-Pentahydroxypent-1-yl)-1,2,3,4-tetrahydro-beta-carboline-3-carboxylate	HMDB0012492	NA	3
Single_Model	459.25	-0.277055	0.354818	-0.780837	0.434899		Anova	model.00	4	40.544	46.649	-16.272	32.544	model.01	5	41.875	49.507	-15.938	31.875	0.6687	1	0.4135	nsig	X459.2498_10.8	pRPLC	[M+H]+		1-Lyso-2-arachidonoyl-phosphatidate	HMDB0012496	NA	3
Single_Model	367.121	-1.33064	0.854784	-1.5567	0.119542		Anova	model.00	4	40.544	46.649	-16.272	32.544	model.01	5	37.83	45.462	-13.915	27.83	4.7132	1	0.02993	nsig	X367.1208_9.1	pHILIC	[M+H]+		2-Hydroxyestrone sulfate	HMDB0012622	NA	3
Single_Model	102.091	-0.613835	0.520085	-1.18026	0.237898		Anova	model.00	4	40.544	46.649	-16.272	32.544	model.01	5	41.012	48.643	-15.506	31.012	1.532	1	0.2158	nsig	X102.0914_3	pHILIC	[M+H]+		5-Aminopentanal	HMDB0012815	C12455	3
Single_Model	269.124	-0.17347	0.291642	-0.594806	0.551973		Anova	model.00	4	40.544	46.649	-16.272	32.544	model.01	5	42.163	49.795	-16.082	32.163	0.3804	1	0.5374	nsig	X269.1241_8.4	pHILIC	[M+H]+	0.802298	Acetylcarnosine	HMDB0012881	NA	1
Single_Model	606.349	-0.383871	0.528541	-0.726285	0.467664		Anova	model.00	4	40.544	46.649	-16.272	32.544	model.01	5	41.964	49.596	-15.982	31.964	0.5795	1	0.4465	nsig	X606.349_11	pRPLC	[M+H]+		Dynorphin B (6-9)	HMDB0012937	NA	3
Single_Model	409.31	1.10089	0.789606	1.39422	0.16325		Anova	model.00	4	40.544	46.649	-16.272	32.544	model.01	5	40.172	47.803	-15.086	30.172	2.372	1	0.1235	nsig	X409.3099_10.9	nRPLC	[M-H]-		Gamma-Tocotrienol	HMDB0012958	C14155	3
Single_Model	359.24	0.325647	0.289044	1.12663	0.259897		Anova	model.00	4	40.544	46.649	-16.272	32.544	model.01	5	40.978	48.61	-15.489	30.978	1.5658	1	0.2108	nsig	X359.2398_8.1	pHILIC	[M+H]+		Kinetensin 1-3	HMDB0012983	NA	3
Single_Model	186.113	-0.396534	0.582288	-0.680994	0.495876		Anova	model.00	4	40.544	46.649	-16.272	32.544	model.01	5	42.067	49.699	-16.034	32.067	0.4766	1	0.49	nsig	X186.1135_3.2	nHILIC	[M-H]-		N-Heptanoylglycine	HMDB0013010	NA	3
Single_Model	303.166	0.287702	0.303929	0.946609	0.343838		Anova	model.00	4	40.544	46.649	-16.272	32.544	model.01	5	41.58	49.212	-15.79	31.58	0.9637	1	0.3263	nsig	X303.166_10.9	pHILIC	[M+H]+		Neuromedin B (1-3)	HMDB0013016	NA	3
Single_Model	396.276	-0.37692	0.763546	-0.493644	0.621558		Anova	model.00	4	40.544	46.649	-16.272	32.544	model.01	5	42.291	49.923	-16.145	32.291	0.2529	1	0.615	nsig	X396.2755_11.5	pRPLC	[M+H]+		Prostaglandin E2 ethanolamide	HMDB0013038	NA	3
Single_Model	236.092	0.488042	0.692073	0.705189	0.480693		Anova	model.00	4	40.544	46.649	-16.272	32.544	model.01	5	42.024	49.656	-16.012	32.024	0.5194	1	0.4711	nsig	X236.0923_4.8	nRPLC	[M-H]-		Salsoline-1-carboxylate	HMDB0013067	NA	3
Single_Model	233.149	-1.20695	0.910494	-1.3256	0.184974		Anova	model.00	4	40.544	46.649	-16.272	32.544	model.01	5	40.415	48.047	-15.207	30.415	2.1287	1	0.1446	nsig	X233.1495_1.2	pHILIC	[M+H]+		Spermic acid 2	HMDB0013075	NA	3
Single_Model	508.375	1.16468	0.594646	1.95861	0.0501589		Anova	model.00	4	40.544	46.649	-16.272	32.544	model.01	5	37.378	45.009	-13.689	27.378	5.166	1	0.02303	nsig	X508.3748_11.6	pRPLC	[M+H]+		LysoPC(P-18:0)	HMDB0013122	C04230	2
Single_Model	247.178	-0.938009	0.554367	-1.69204	0.0906389		Anova	model.00	4	40.544	46.649	-16.272	32.544	model.01	5	38.53	46.161	-14.265	28.53	4.0141	1	0.04512	nsig	X247.1775_8	pRPLC	[M+H]+		C5:0 AC (Valerylcarnitine)	HMDB0013128	NA	2
Single_Model	444.368	0.06028	0.190099	0.317098	0.751169		Anova	model.00	4	40.544	46.649	-16.272	32.544	model.01	5	42.441	50.073	-16.221	32.441	0.1024	1	0.7489	nsig	X444.3679_5.9	pHILIC	[M+H]+		18:0, OH AC (Hydroxy-stearoylcarnitine)	HMDB0013154	NA	2
Single_Model	320.062	-0.145107	0.387881	-0.374101	0.708329		Anova	model.00	4	40.544	46.649	-16.272	32.544	model.01	5	42.405	50.037	-16.203	32.405	0.1383	1	0.71	nsig	X320.0621_12.8	nHILIC	[M-H]-	0.832834	Beta-Citryl-L-glutamic acid	HMDB0013220	NA	1
Single_Model	279.17	-0.051295	0.343795	-0.149202	0.881394		Anova	model.00	4	40.544	46.649	-16.272	32.544	model.01	5	42.521	50.153	-16.261	32.521	0.0224	1	0.8812	nsig	X279.1702_4.5	pHILIC	[M+H]+		Leucyl-phenylalanine	HMDB0013243	C11221	3
Single_Model	154.097	-0.0803942	0.401518	-0.200226	0.841304		Anova	model.00	4	40.544	46.649	-16.272	32.544	model.01	5	42.504	50.136	-16.252	32.504	0.0397	1	0.842	nsig	X154.0974_2.2	pHILIC	[M+H]+	0.759147	Nw-Acetylhistamine	HMDB0013253	C05135	1
Single_Model	228.161	-0.553694	0.608935	-0.909282	0.363201		Anova	model.00	4	40.544	46.649	-16.272	32.544	model.01	5	41.669	49.301	-15.835	31.669	0.8746	1	0.3497	nsig	X228.1605_1.5	nHILIC	[M-H]-		N-Decanoylglycine	HMDB0013267	NA	3
Single_Model	244.191	-0.201094	0.482573	-0.416712	0.676889		Anova	model.00	4	40.544	46.649	-16.272	32.544	model.01	5	42.368	50	-16.184	32.368	0.1753	1	0.6755	nsig	X244.1906_1.5	pHILIC	[M+H]+		N-Undecanoylglycine	HMDB0013286	NA	3
Single_Model	175.144	1.18938	1.03585	1.14822	0.250877		Anova	model.00	4	40.544	46.649	-16.272	32.544	model.01	5	41.059	48.691	-15.53	31.059	1.4843	1	0.2231	nsig	X175.1441_18.3	pHILIC	[M+H]+		Ne,Ne dimethyllysine	HMDB0013287	C05545	1
Single_Model	313.154	0.101291	0.325688	0.311007	0.755795		Anova	model.00	4	40.544	46.649	-16.272	32.544	model.01	5	42.446	50.078	-16.223	32.446	0.0973	1	0.755	nsig	X313.1545_4.1	pHILIC	[M+H]+	0.819266	Phe-Phe	HMDB0013302	NA	2
Single_Model	304.175	-0.65182	0.392622	-1.66017	0.09688		Anova	model.00	4	40.544	46.649	-16.272	32.544	model.01	5	38.844	46.476	-14.422	28.844	3.6993	1	0.05444	nsig	X304.1752_10.5	pHILIC	[M+H]+		Pimelylcarnitine	HMDB0013328	NA	2
Single_Model	412.305	0.0876831	0.249486	0.351455	0.725247		Anova	model.00	4	40.544	46.649	-16.272	32.544	model.01	5	42.418	50.05	-16.209	32.418	0.1259	1	0.7228	nsig	X412.3046_11.4	pRPLC	[M+H]+		3-Hydroxyhexadecadienoylcarnitine	HMDB0013335	NA	3
Single_Model	416.337	0.17964	0.275195	0.652773	0.513903		Anova	model.00	4	40.544	46.649	-16.272	32.544	model.01	5	42.059	49.691	-16.029	32.059	0.4849	1	0.4862	nsig	X416.3367_6	pHILIC	[M+H]+		3-Hydroxyhexadecanoylcarnitine	HMDB0013336	NA	3
Single_Model	442.351	-0.362104	0.294623	-1.22904	0.219056		Anova	model.00	4	40.544	46.649	-16.272	32.544	model.01	5	40.971	48.603	-15.486	30.971	1.5724	1	0.2099	nsig	X442.3515_9.8	pRPLC	[M+H]+	0.771962	C18:1, OH AC (Hydroxyoleylcarnitine)	HMDB0013339	NA	2
Single_Model	295.264	0.75135	0.487128	1.54241	0.122975		Anova	model.00	4	40.544	46.649	-16.272	32.544	model.01	5	39.712	47.344	-14.856	29.712	2.8317	1	0.09242	nsig	X295.264_1.4	nHILIC	[M-H]-		10Z-Nonadecenoic acid	HMDB0013622	NA	3
Single_Model	391.246	-0.0318018	0.0971221	-0.327441	0.743334		Anova	model.00	4	40.544	46.649	-16.272	32.544	model.01	5	42.433	50.064	-16.216	32.433	0.1111	1	0.7388	nsig	X391.246_13.7	pRPLC	[M+H]+		15-deoxy-delta12,14-Prostaglandin J2-2-glycerol ester	HMDB0013656	NA	3
Single_Model	83.0491	-1.03123	0.801801	-1.28614	0.198393		Anova	model.00	4	40.544	46.649	-16.272	32.544	model.01	5	40.699	48.331	-15.35	30.699	1.8445	1	0.1744	nsig	X83.0491_0.6	pRPLC	[M+H]+		2-Methylfuran	HMDB0013749	NA	3
Single_Model	96.0444	-1.76488	1.18022	-1.49538	0.134815		Anova	model.00	4	40.544	46.649	-16.272	32.544	model.01	5	39.889	47.521	-14.944	29.889	2.6546	1	0.1032	nsig	X96.0444_10.6	pHILIC	[M+H]+		2-Hydroxypyridine	HMDB0013751	C02502	3
Single_Model	221.153	-0.639812	0.649198	-0.985542	0.324358		Anova	model.00	4	40.544	46.649	-16.272	32.544	model.01	5	41.49	49.121	-15.745	31.49	1.054	1	0.3046	nsig	X221.1531_0.5	pRPLC	[M+H]+		2,6-Di-tert-butylbenzoquinone	HMDB0013817	NA	3
Single_Model	278.042	0.0415178	0.275261	0.150831	0.880109		Anova	model.00	4	40.544	46.649	-16.272	32.544	model.01	5	42.521	50.153	-16.261	32.521	0.0227	1	0.8802	nsig	X278.0423_6	nRPLC	[M-H]-		7-Hydroxyticlopidine	HMDB0013921	NA	3
Single_Model	330.097	-1.56633	0.834066	-1.87795	0.0603881		Anova	model.00	4	40.544	46.649	-16.272	32.544	model.01	5	37.232	44.864	-13.616	27.232	5.3114	1	0.02119	nsig	X330.0971_4.7	nRPLC	[M-H]-		R-95913	HMDB0013930	NA	3
Single_Model	251.103	0.409366	0.54293	0.753995	0.450852		Anova	model.00	4	40.544	46.649	-16.272	32.544	model.01	5	41.964	49.596	-15.982	31.964	0.5798	1	0.4464	nsig	X251.1035_6.1	nHILIC	[M-H]-		3'-Hydroxyhexobarbital	HMDB0013940	NA	3
Single_Model	423.191	-0.445915	0.341508	-1.30573	0.191646		Anova	model.00	4	40.544	46.649	-16.272	32.544	model.01	5	40.584	48.216	-15.292	30.584	1.9596	1	0.1616	nsig	X423.191_2.6	pHILIC	[M+H]+		8-Hydroxycarvedilol	HMDB0013946	NA	3
Single_Model	221.074	-0.925815	0.715271	-1.29436	0.195543		Anova	model.00	4	40.544	46.649	-16.272	32.544	model.01	5	40.495	48.127	-15.247	30.495	2.0489	1	0.1523	nsig	X221.0738_5.3	pRPLC	[M+H]+		Dehydroxyzyleuton	HMDB0013970	NA	3
Single_Model	330.091	0.33989	0.434104	0.782969	0.433646		Anova	model.00	4	40.544	46.649	-16.272	32.544	model.01	5	41.844	49.475	-15.922	31.844	0.7002	1	0.4027	nsig	X330.0915_4.4	nHILIC	[M-H]-		5'-O-Desmethyl omeprazole	HMDB0014011	NA	3
Single_Model	311.154	-0.470308	0.496185	-0.947848	0.343207		Anova	model.00	4	40.544	46.649	-16.272	32.544	model.01	5	41.449	49.081	-15.725	31.449	1.0947	1	0.2954	nsig	X311.154_5.2	pRPLC	[M+H]+		N-Desmethylcitalopram	HMDB0014021	C16608	3
Single_Model	319.164	0.255614	0.299296	0.854053	0.393076		Anova	model.00	4	40.544	46.649	-16.272	32.544	model.01	5	41.801	49.433	-15.901	31.801	0.7424	1	0.3889	nsig	X319.164_6.7	pRPLC	[M+H]+		Fluvoxamine	HMDB0014322	C07571	3
Single_Model	246.181	2.11009	1.11155	1.89832	0.0576534		Anova	model.00	4	40.544	46.649	-16.272	32.544	model.01	5	37.194	44.826	-13.597	27.194	5.3498	1	0.02072	nsig	X246.1812_16.9	pHILIC	[M+H-H2O]+	0.709981	Tramadol	HMDB0014339	C07153	2
Single_Model	305.098	-0.00585437	0.378636	-0.0154617	0.987664		Anova	model.00	4	40.544	46.649	-16.272	32.544	model.01	5	42.543	50.175	-16.272	32.543	0.0002	1	0.9877	nsig	X305.098_6.7	nRPLC	[M-H]-		Fluconazole	HMDB0014342	NA	3
Single_Model	301.074	0.0449114	0.286281	0.156879	0.87534		Anova	model.00	4	40.544	46.649	-16.272	32.544	model.01	5	42.519	50.151	-16.259	32.519	0.0246	1	0.8755	nsig	X301.0744_8.2	pRPLC	[M+H]+		Temazepam	HMDB0014376	C07125	3
Single_Model	253.096	0.304641	0.374212	0.814087	0.415595		Anova	model.00	4	40.544	46.649	-16.272	32.544	model.01	5	41.905	49.537	-15.953	31.905	0.6385	1	0.4243	nsig	X253.0962_4.6	pRPLC	[M+H]+		Phenytoin	HMDB0014397	C07443	3
Single_Model	253.99	-1.55701	0.889115	-1.75119	0.0799127		Anova	model.00	4	40.544	46.649	-16.272	32.544	model.01	5	34.709	42.341	-12.354	24.709	7.8349	1	0.005125	nsig	X253.9899_2.6	nRPLC	[M-H]-		Anagrelide	HMDB0014406	NA	3
Single_Model	268.075	-0.9392	0.645948	-1.45399	0.14595		Anova	model.00	4	40.544	46.649	-16.272	32.544	model.01	5	39.016	46.647	-14.508	29.016	3.528	1	0.06034	nsig	X268.0755_3.1	pRPLC	[M+H]+		Sulfisoxazole	HMDB0014408	C07318	3
Single_Model	254.126	-0.162861	0.363269	-0.448321	0.653921		Anova	model.00	4	40.544	46.649	-16.272	32.544	model.01	5	42.344	49.976	-16.172	32.344	0.1997	1	0.6549	nsig	X254.126_4.4	pRPLC	[M+H]+		Penciclovir	HMDB0014444	C07417	3
Single_Model	349.211	1.74093	0.896165	1.94265	0.0520585		Anova	model.00	4	40.544	46.649	-16.272	32.544	model.01	5	37.084	44.716	-13.542	27.084	5.4597	1	0.01946	nsig	X349.2105_11.7	pRPLC	[M+H]+	0.754234	Bexarotene	HMDB0014452	NA	2
Single_Model	516.155	-0.478923	0.331089	-1.44651	0.148035		Anova	model.00	4	40.544	46.649	-16.272	32.544	model.01	5	39.471	47.103	-14.736	29.471	3.0724	1	0.07963	nsig	X516.1554_4.4	nHILIC	[M-H]-	0.770846	Piperacillin	HMDB0014464	C14034	2
Single_Model	272.057	0.206044	0.18052	1.14139	0.253707		Anova	model.00	4	40.544	46.649	-16.272	32.544	model.01	5	41.122	48.753	-15.561	31.122	1.4221	1	0.2331	nsig	X272.0567_2.5	nRPLC	[M-H]-		Tolcapone	HMDB0014468	C07949	3
Single_Model	433.24	-0.0487845	0.306394	-0.159222	0.873494		Anova	model.00	4	40.544	46.649	-16.272	32.544	model.01	5	42.518	50.15	-16.259	32.518	0.0257	1	0.8727	nsig	X433.2401_12.7	pHILIC	[M+H]+		Buclizine	HMDB0014498	C07777	3
Single_Model	217.119	0.22273	0.376037	0.592308	0.553644		Anova	model.00	4	40.544	46.649	-16.272	32.544	model.01	5	42.102	49.733	-16.051	32.102	0.4421	1	0.5061	nsig	X217.1193_7	nHILIC	[M-H]-		Meprobamate	HMDB0014515	NA	3
Single_Model	311.159	-0.00472746	0.256385	-0.0184389	0.985289		Anova	model.00	4	40.544	46.649	-16.272	32.544	model.01	5	42.543	50.175	-16.272	32.543	0.0003	1	0.9853	nsig	X311.1587_1.5	nRPLC	[M-H]-		Ethopropazine	HMDB0014536	NA	3
Single_Model	261.181	0.0322595	0.317204	0.1017	0.918995		Anova	model.00	4	40.544	46.649	-16.272	32.544	model.01	5	42.533	50.165	-16.267	32.533	0.0103	1	0.9191	nsig	X261.1808_8.7	pHILIC	[M+H]+		Carisoprodol	HMDB0014539	C07927	3
Single_Model	350.116	-0.549837	0.40926	-1.34349	0.179113		Anova	model.00	4	40.544	46.649	-16.272	32.544	model.01	5	40.541	48.173	-15.271	30.541	2.0024	1	0.157	nsig	X350.1157_5.5	pRPLC	[M+H]+		Ampicillin	HMDB0014559	C06574	3
Single_Model	239.139	0.484209	0.341196	1.41915	0.155854		Anova	model.00	4	40.544	46.649	-16.272	32.544	model.01	5	40.256	47.888	-15.128	30.256	2.2872	1	0.1304	nsig	X239.1388_12.5	pHILIC	[M+H]+		Secobarbital	HMDB0014562	NA	3
Single_Model	199.108	-0.381636	0.365203	-1.045	0.296024		Anova	model.00	4	40.544	46.649	-16.272	32.544	model.01	5	41.3	48.932	-15.65	31.3	1.2435	1	0.2648	nsig	X199.1077_6.4	pHILIC	[M+H]+		Metharbital	HMDB0014606	NA	3
Single_Model	295.194	-0.487491	0.655469	-0.743729	0.45704		Anova	model.00	4	40.544	46.649	-16.272	32.544	model.01	5	41.824	49.456	-15.912	31.824	0.7199	1	0.3962	nsig	X295.1937_12.2	pRPLC	[M+H]+		Sodium Tetradecyl Sulfate	HMDB0014607	NA	3
Single_Model	603.207	-0.319373	0.22443	-1.42304	0.154723		Anova	model.00	4	40.544	46.649	-16.272	32.544	model.01	5	40.316	47.947	-15.158	30.316	2.2281	1	0.1355	nsig	X603.2075_4.5	pHILIC	[M+H]+		Picrotoxin	HMDB0014609	NA	3
Single_Model	208.118	0.0699762	0.24799	0.282173	0.777811		Anova	model.00	4	40.544	46.649	-16.272	32.544	model.01	5	42.463	50.095	-16.231	32.463	0.0808	1	0.7763	nsig	X208.1179_2.1	pHILIC	[M+H]+		Miglitol	HMDB0014634	C07708	3
Single_Model	369.028	-0.254376	0.294908	-0.86256	0.388379		Anova	model.00	4	40.544	46.649	-16.272	32.544	model.01	5	41.761	49.393	-15.88	31.761	0.7827	1	0.3763	nsig	X369.028_6.6	pHILIC	[M+H]+		Chlormerodrin	HMDB0014674	NA	3
Single_Model	331.126	0.0434617	0.33867	0.128331	0.897887		Anova	model.00	4	40.544	46.649	-16.272	32.544	model.01	5	42.527	50.159	-16.264	32.527	0.0167	1	0.8971	nsig	X331.1257_11	nHILIC	[M-H]-		Zanamivir	HMDB0014698	C08095	3
Single_Model	330.106	0.0260378	0.311997	0.0834554	0.933489		Anova	model.00	4	40.544	46.649	-16.272	32.544	model.01	5	42.537	50.168	-16.268	32.537	0.007	1	0.9334	nsig	X330.1059_3.7	nRPLC	[M-H]-		Nizatidine	HMDB0014723	C07270	3
Single_Model	339.22	0.204662	1.10437	0.18532	0.852978		Anova	model.00	4	40.544	46.649	-16.272	32.544	model.01	5	42.509	50.141	-16.255	32.509	0.0344	1	0.8528	nsig	X339.2196_11.8	pRPLC	[M+H]+		Lisuride	HMDB0014727	NA	3
Single_Model	142.086	0.702808	0.459702	1.52883	0.126306		Anova	model.00	4	40.544	46.649	-16.272	32.544	model.01	5	39.815	47.447	-14.907	29.815	2.7288	1	0.09855	nsig	X142.0863_8	pHILIC	[M+H]+	0.717581	Ethosuximide	HMDB0014731	C07505	2
Single_Model	226.045	-0.100112	0.237819	-0.420958	0.673785		Anova	model.00	4	40.544	46.649	-16.272	32.544	model.01	5	42.359	49.991	-16.179	32.359	0.1848	1	0.6672	nsig	X226.045_7.9	pHILIC	[M+H]+		Furazolidone	HMDB0014752	C07999	3
Single_Model	180.034	1.36679	0.737896	1.85227	0.0639867		Anova	model.00	4	40.544	46.649	-16.272	32.544	model.01	5	38.269	45.901	-14.134	28.269	4.2748	1	0.03868	nsig	X180.0336_4.5	nHILIC	[M-H]-	0.823631	Acamprosate	HMDB0014797	NA	2
Single_Model	281.069	-0.337335	0.533444	-0.632373	0.527143		Anova	model.00	4	40.544	46.649	-16.272	32.544	model.01	5	42.133	49.764	-16.066	32.133	0.411	1	0.5214	nsig	X281.0689_6.7	pRPLC	[M+H]+		Sulfametopyrazine	HMDB0014802	C12616	3
Single_Model	415.211	-0.63581	0.405443	-1.56819	0.116838		Anova	model.00	4	40.544	46.649	-16.272	32.544	model.01	5	39.519	47.151	-14.76	29.519	3.0243	1	0.08203	nsig	X415.2113_0.9	pHILIC	[M+H]+		Eplerenone	HMDB0014838	C12512	3
Single_Model	342.17	-0.0111743	0.307555	-0.0363327	0.971017		Anova	model.00	4	40.544	46.649	-16.272	32.544	model.01	5	42.542	50.174	-16.271	32.542	0.0013	1	0.971	nsig	X342.1698_6.5	pHILIC	[M+H]+		Naltrexone	HMDB0014842	C07253	3
Single_Model	235.014	-0.508921	0.394635	-1.2896	0.197189		Anova	model.00	4	40.544	46.649	-16.272	32.544	model.01	5	40.428	48.06	-15.214	30.428	2.1157	1	0.1458	nsig	X235.0143_4.2	pRPLC	[M+H]+	0.704215	Riluzole	HMDB0014878	C07937	2
Single_Model	221.165	0.249886	0.300692	0.831038	0.405952		Anova	model.00	4	40.544	46.649	-16.272	32.544	model.01	5	41.851	49.483	-15.925	31.851	0.6928	1	0.4052	nsig	X221.1648_5.2	pHILIC	[M+H]+		Prilocaine	HMDB0014888	C07531	3
Single_Model	196.097	0.0916848	0.363832	0.251997	0.801043		Anova	model.00	4	40.544	46.649	-16.272	32.544	model.01	5	42.48	50.112	-16.24	32.48	0.0632	1	0.8015	nsig	X196.0969_8.5	pHILIC	[M+H]+		Metyrosine	HMDB0014903	C07921	3
Single_Model	330.203	-0.696007	0.511609	-1.36043	0.173695		Anova	model.00	4	40.544	46.649	-16.272	32.544	model.01	5	40.198	47.83	-15.099	30.198	2.3452	1	0.1257	nsig	X330.2033_5.3	nHILIC	[M-H]-		Marimastat	HMDB0014924	NA	3
Single_Model	611.259	0.150824	0.225585	0.66859	0.503757		Anova	model.00	4	40.544	46.649	-16.272	32.544	model.01	5	42.079	49.711	-16.04	32.079	0.4642	1	0.4956	nsig	X611.2591_7.3	pRPLC	[M+H]+		Candesartan cilexetil	HMDB0014934	C07468	3
Single_Model	306.093	0.333432	0.201414	1.65545	0.0978333		Anova	model.00	4	40.544	46.649	-16.272	32.544	model.01	5	38.915	46.547	-14.458	28.915	3.6285	1	0.0568	nsig	X306.0928_11.8	pHILIC	[M+H]+	0.687622	Fenoldopam	HMDB0014938	C07693	2
Single_Model	220.981	-0.459195	0.328559	-1.3976	0.162233		Anova	model.00	4	40.544	46.649	-16.272	32.544	model.01	5	40.26	47.892	-15.13	30.26	2.2832	1	0.1308	nsig	X220.9809_4.2	nHILIC	[M-H]-		Acetazolamide	HMDB0014957	C06805	3
Single_Model	453.183	0.65615	0.44224	1.48369	0.13789		Anova	model.00	4	40.544	46.649	-16.272	32.544	model.01	5	39.962	47.594	-14.981	29.962	2.5816	1	0.1081	nsig	X453.1825_12.2	pRPLC	[M+H]+		Clocortolone acetate	HMDB0014976	NA	3
Single_Model	205.079	-0.681098	0.589121	-1.15612	0.24763		Anova	model.00	4	40.544	46.649	-16.272	32.544	model.01	5	41.004	48.636	-15.502	31.004	1.5397	1	0.2147	nsig	X205.0791_5.9	pRPLC	[M+H]+		Levamisole	HMDB0014986	C07070	3
Single_Model	195.062	-0.201894	0.710252	-0.284257	0.776214		Anova	model.00	4	40.544	46.649	-16.272	32.544	model.01	5	42.462	50.094	-16.231	32.462	0.0815	1	0.7753	nsig	X195.0623_4.3	pRPLC	[M+H]+		Temozolomide	HMDB0014991	NA	3
Single_Model	261.057	0.215879	0.468769	0.460523	0.645141		Anova	model.00	4	40.544	46.649	-16.272	32.544	model.01	5	42.319	49.951	-16.159	32.319	0.2248	1	0.6354	nsig	X261.0573_0.6	pRPLC	[M+H]+		Suprofen	HMDB0015008	C07320	3
Single_Model	267.137	0.220266	0.285556	0.771361	0.440493		Anova	model.00	4	40.544	46.649	-16.272	32.544	model.01	5	41.891	49.523	-15.945	31.891	0.6527	1	0.4192	nsig	X267.1367_6.1	pHILIC	[M+H]+		Dienestrol	HMDB0015027	C08090	3
Single_Model	235.083	-1.90173	1.04159	-1.82579	0.0678815		Anova	model.00	4	40.544	46.649	-16.272	32.544	model.01	5	37.703	45.335	-13.852	27.703	4.8404	1	0.0278	nsig	X235.0826_7	nRPLC	[M-H]-		Didanosine	HMDB0015037	C06953	3
Single_Model	211.018	-0.770278	0.460187	-1.67384	0.0941627		Anova	model.00	4	40.544	46.649	-16.272	32.544	model.01	5	38.716	46.348	-14.358	28.716	3.8276	1	0.05042	nsig	X211.0181_4.2	nRPLC	[M-H]-		Zonisamide	HMDB0015045	C07504	3
Single_Model	538.108	-0.143393	0.374823	-0.382562	0.702045		Anova	model.00	4	40.544	46.649	-16.272	32.544	model.01	5	42.396	50.027	-16.198	32.396	0.148	1	0.7004	nsig	X538.1077_1.4	nRPLC	[M-H]-		Mezlocillin	HMDB0015083	C07221	3
Single_Model	239.102	0.177345	0.289472	0.612649	0.540108		Anova	model.00	4	40.544	46.649	-16.272	32.544	model.01	5	42.193	49.824	-16.096	32.193	0.3511	1	0.5535	nsig	X239.1024_8.8	pHILIC	[M+H]+		Felbamate	HMDB0015084	C07501	3
Single_Model	284.093	0.319473	0.274144	1.16535	0.243878		Anova	model.00	4	40.544	46.649	-16.272	32.544	model.01	5	41.076	48.707	-15.538	31.076	1.4681	1	0.2257	nsig	X284.0928_5.1	nRPLC	[M-H]-		Letrozole	HMDB0015141	C08163	3
Single_Model	193.133	0.418909	0.336793	1.24382	0.213567		Anova	model.00	4	40.544	46.649	-16.272	32.544	model.01	5	40.733	48.365	-15.367	30.733	1.8104	1	0.1785	nsig	X193.1335_1.4	pHILIC	[M+H]+		Tocainide	HMDB0015189	C07142	3
Single_Model	460.129	-0.27897	0.337255	-0.827179	0.408136		Anova	model.00	4	40.544	46.649	-16.272	32.544	model.01	5	41.831	49.463	-15.916	31.831	0.7124	1	0.3986	nsig	X460.1292_5.8	nHILIC	[M-H]-		Azlocillin	HMDB0015194	C06839	3
Single_Model	269.054	-0.279636	0.398827	-0.701147	0.483211		Anova	model.00	4	40.544	46.649	-16.272	32.544	model.01	5	42.047	49.679	-16.024	32.047	0.4965	1	0.4811	nsig	X269.0543_6.5	nHILIC	[M-H]-		Leflunomide	HMDB0015229	C07905	3
Single_Model	345.109	-0.207135	0.239415	-0.865171	0.386945		Anova	model.00	4	40.544	46.649	-16.272	32.544	model.01	5	41.752	49.384	-15.876	31.752	0.7914	1	0.3737	nsig	X345.1091_8.3	nHILIC	[M-H]-		Nifedipine	HMDB0015247	C07266	3
Single_Model	324.136	-0.737518	0.381097	-1.93525	0.0529594		Anova	model.00	4	40.544	46.649	-16.272	32.544	model.01	5	37.605	45.237	-13.803	27.605	4.9384	1	0.02627	nsig	X324.1363_5.5	pRPLC	[M+H]+		Gliclazide	HMDB0015252	NA	3
Single_Model	487.235	0.110879	0.494123	0.224396	0.822449		Anova	model.00	4	40.544	46.649	-16.272	32.544	model.01	5	42.493	50.125	-16.247	32.493	0.0505	1	0.8222	nsig	X487.2345_9.9	nRPLC	[M-H]-		Prednicarbate	HMDB0015262	NA	3
Single_Model	234.1	0.35457	0.56886	0.6233	0.533087		Anova	model.00	4	40.544	46.649	-16.272	32.544	model.01	5	42.143	49.775	-16.072	32.143	0.4005	1	0.5268	nsig	X234.1002_5.1	pRPLC	[M+H]+		Lomustine	HMDB0015337	C07079	3
Single_Model	299.158	-0.0663409	0.281566	-0.235614	0.813732		Anova	model.00	4	40.544	46.649	-16.272	32.544	model.01	5	42.486	50.118	-16.243	32.486	0.0578	1	0.8101	nsig	X299.1577_8.8	pHILIC	[M+H]+		Trimeprazine	HMDB0015376	C07172	3
Single_Model	212.118	-1.23069	0.0135699	-90.6925	0		Anova	model.00	4	40.544	46.649	-16.272	32.544	model.01	5	40.383	48.015	-15.192	30.383	2.1604	1	0.1416	nsig	X212.1181_2.4	pHILIC	[M+H]+	0.732215	Varenicline	HMDB0015398	NA	2
Single_Model	309.068	-0.0906063	0.313384	-0.289122	0.772488		Anova	model.00	4	40.544	46.649	-16.272	32.544	model.01	5	42.463	50.095	-16.231	32.463	0.0809	1	0.776	nsig	X309.0677_9.7	nHILIC	[M-H]-		Sulfadoxine	HMDB0015413	C07630	3
Single_Model	361.059	-0.828308	0.753782	-1.09887	0.271825		Anova	model.00	4	40.544	46.649	-16.272	32.544	model.01	5	41.202	48.833	-15.601	31.202	1.3421	1	0.2467	nsig	X361.0592_3.7	nRPLC	[M-H]-		Fosphenytoin	HMDB0015417	C07840	3
Single_Model	288.021	-1.29803	0.683786	-1.8983	0.0576572		Anova	model.00	4	40.544	46.649	-16.272	32.544	model.01	5	37.492	45.124	-13.746	27.492	5.0516	1	0.0246	nsig	X288.0211_8.1	nHILIC	[M-H]-		Quinethazone	HMDB0015420	C07342	3
Single_Model	148.112	-0.5417	0.391813	-1.38255	0.166804		Anova	model.00	4	40.544	46.649	-16.272	32.544	model.01	5	40.482	48.114	-15.241	30.482	2.0614	1	0.1511	nsig	X148.112_4.2	pHILIC	[M+H-H2O]+	0.827067	Ephedrine	HMDB0015451	C01575	2
Single_Model	277.088	-0.382424	0.305221	-1.25294	0.210228		Anova	model.00	4	40.544	46.649	-16.272	32.544	model.01	5	40.914	48.546	-15.457	30.914	1.6292	1	0.2018	nsig	X277.0881_0.6	pRPLC	[M+H]+		Clenbuterol	HMDB0015477	NA	3
Single_Model	272.007	0.440363	0.576322	0.764093	0.444812		Anova	model.00	4	40.544	46.649	-16.272	32.544	model.01	5	41.868	49.499	-15.934	31.868	0.6761	1	0.4109	nsig	X272.0069_9	nHILIC	[M-H]-		Stepronin	HMDB0015492	NA	3
Single_Model	232.14	-0.108209	1.0155	-0.106558	0.91514		Anova	model.00	4	40.544	46.649	-16.272	32.544	model.01	5	42.532	50.164	-16.266	32.532	0.0114	1	0.9148	nsig	X232.1404_14.5	pHILIC	[M+H]+	0.68013	Aminophenazone	HMDB0015493	C07539	2
Single_Model	279.092	0.281639	0.262786	1.07174	0.283835		Anova	model.00	4	40.544	46.649	-16.272	32.544	model.01	5	41.242	48.874	-15.621	31.242	1.3017	1	0.2539	nsig	X279.0922_8.2	pRPLC	[M+H]+		Sulfamethazine	HMDB0015522	C19530	3
Single_Model	387.036	0.663234	0.422951	1.56811	0.116855		Anova	model.00	4	40.544	46.649	-16.272	32.544	model.01	5	39.306	46.938	-14.653	29.306	3.2374	1	0.07197	nsig	X387.0355_8.9	pHILIC	[M+H]+		Quazepam	HMDB0015528	C07336	3
Single_Model	299.045	0.501942	0.318098	1.57795	0.114578		Anova	model.00	4	40.544	46.649	-16.272	32.544	model.01	5	39.375	47.007	-14.688	29.375	3.1685	1	0.07507	nsig	X299.0445_2.5	nRPLC	[M-H]-		Tazobactam	HMDB0015544	C07771	3
Single_Model	265.154	0.202846	0.297887	0.68095	0.495903		Anova	model.00	4	40.544	46.649	-16.272	32.544	model.01	5	42.075	49.706	-16.037	32.075	0.4691	1	0.4934	nsig	X265.1538_2.7	pRPLC	[M+H]+		Vorinostat	HMDB0015568	NA	3
Single_Model	365.246	-0.655821	0.0217324	-30.1771	4.73e-200		Anova	model.00	4	40.544	46.649	-16.272	32.544	model.01	5	41.611	49.243	-15.806	31.611	0.9322	1	0.3343	nsig	X365.2461_10.8	pRPLC	[M+H]+		Quinestrol	HMDB0015579	C07619	3
Single_Model	311.154	-0.215051	0.464424	-0.463048	0.64333		Anova	model.00	4	40.544	46.649	-16.272	32.544	model.01	5	42.325	49.957	-16.163	32.325	0.2184	1	0.6402	nsig	X311.1535_7.6	pRPLC	[M+H]+		Bifonazole	HMDB0015583	NA	3
Single_Model	405.212	-0.621593	0.665692	-0.933755	0.35043		Anova	model.00	4	40.544	46.649	-16.272	32.544	model.01	5	41.53	49.162	-15.765	31.53	1.0138	1	0.314	nsig	X405.2125_10.8	pRPLC	[M+H]+		Flunarizine	HMDB0015589	NA	3
Single_Model	344.316	-0.161726	0.154166	-1.04904	0.294162		Anova	model.00	4	40.544	46.649	-16.272	32.544	model.01	5	41.363	48.994	-15.681	31.363	1.1811	1	0.2771	nsig	X344.3157_1.2	pHILIC	[M+H]+		Ethanolamine oleate	HMDB0015638	NA	3
Single_Model	297.171	-0.324094	0.52028	-0.622921	0.533336		Anova	model.00	4	40.544	46.649	-16.272	32.544	model.01	5	42.129	49.761	-16.065	32.129	0.4142	1	0.5198	nsig	X297.1706_5.4	nHILIC	[M-H]-		Artemether	HMDB0015643	NA	3
Single_Model	255.112	-0.648258	0.426471	-1.52005	0.128498		Anova	model.00	4	40.544	46.649	-16.272	32.544	model.01	5	39.688	47.319	-14.844	29.688	2.8561	1	0.09103	nsig	X255.1122_7.5	pRPLC	[M+H]+		Nepafenac	HMDB0015678	NA	3
Single_Model	90.055	-2.31506	1.47369	-1.57092	0.116201		Anova	model.00	4	40.544	46.649	-16.272	32.544	model.01	5	39.389	47.021	-14.694	29.389	3.1549	1	0.0757	nsig	X90.055_9.1	pHILIC	[M+H]+	0.822254	L-Alanine	HMDB00161	C00041	1
Single_Model	89.0245	-3.16586	1.71892	-1.84177	0.0655084		Anova	model.00	4	40.544	46.649	-16.272	32.544	model.01	5	38.598	46.229	-14.299	28.598	3.946	1	0.04698	nsig	X89.0245_6.4	nHILIC	[M-H]-	0.817693	L-Lactic acid	HMDB00190	C00186	1
Single_Model	281.248	1.31977	1.20208	1.0979	0.272248		Anova	model.00	4	40.544	46.649	-16.272	32.544	model.01	5	41.198	48.83	-15.599	31.198	1.3457	1	0.246	nsig	X281.2479_12.5	nRPLC	[M-H]-		C18:1 FA (Oleic acid)	HMDB00207	C00712	1
Single_Model	255.233	-1.34363	0.850109	-1.58054	0.113984		Anova	model.00	4	40.544	46.649	-16.272	32.544	model.01	5	39.489	47.121	-14.745	29.489	3.0543	1	0.08053	nsig	X255.2328_0.9	nHILIC	[M-H]-		C16:0 FA (Palmitic acid)	HMDB00220	C00249	1
Single_Model	400.341	0.534985	0.523575	1.02179	0.306879		Anova	model.00	4	40.544	46.649	-16.272	32.544	model.01	5	41.418	49.05	-15.709	31.418	1.1256	1	0.2887	nsig	X400.341_10.2	pRPLC	[M+H]+	0.822234	C16:0 AC (L-Palmitoylcarnitine)	HMDB00222	C02990	1
Single_Model	282.278	-1.65384	1.10325	-1.49906	0.133858		Anova	model.00	4	40.544	46.649	-16.272	32.544	model.01	5	39.524	47.156	-14.762	29.524	3.0198	1	0.08226	nsig	X282.2782_9.1	pRPLC	[M+H-H2O]+	0.75761	D-erythro-N-stearoylsphingosine	HMDB00252	C00319	2
Single_Model	202.083	-0.0943909	0.34208	-0.275932	0.7826		Anova	model.00	4	40.544	46.649	-16.272	32.544	model.01	5	42.467	50.099	-16.234	32.467	0.0762	1	0.7826	nsig	X202.0833_10.8	nHILIC	[M-H]-		Alanyl-Asparagine	HMDB0028682	NA	3
Single_Model	201.088	0.849555	0.628391	1.35195	0.176391		Anova	model.00	4	40.544	46.649	-16.272	32.544	model.01	5	40.323	47.955	-15.162	30.323	2.2206	1	0.1362	nsig	X201.088_10.3	nHILIC	[M-H]-		Alanyl-Hydroxyproline	HMDB0028688	NA	3
Single_Model	201.124	0.289642	0.525023	0.551674	0.581172		Anova	model.00	4	40.544	46.649	-16.272	32.544	model.01	5	42.235	49.867	-16.117	32.235	0.3086	1	0.5785	nsig	X201.1244_6.1	nHILIC	[M-H]-		Alanyl-Isoleucine	HMDB0028690	NA	3
Single_Model	201.124	0.563374	0.695617	0.809891	0.418003		Anova	model.00	4	40.544	46.649	-16.272	32.544	model.01	5	41.857	49.489	-15.929	31.857	0.6863	1	0.4074	nsig	X201.1244_9.2	nHILIC	[M-H]-	0.685092	Ala-Leu	HMDB0028691	NA	2
Single_Model	237.123	0.548133	0.405697	1.35109	0.176667		Anova	model.00	4	40.544	46.649	-16.272	32.544	model.01	5	40.332	47.964	-15.166	30.332	2.2115	1	0.137	nsig	X237.1232_5.4	pHILIC	[M+H]+	0.715509	Ala-Phe	HMDB0028694	NA	2
Single_Model	251.104	0.178664	0.299864	0.595816	0.551298		Anova	model.00	4	40.544	46.649	-16.272	32.544	model.01	5	42.182	49.814	-16.091	32.182	0.3614	1	0.5478	nsig	X251.1036_8	nHILIC	[M-H]-	0.7943	Ala-Tyr	HMDB0028699	NA	2
Single_Model	276.113	-0.668448	0.489364	-1.36595	0.171954		Anova	model.00	4	40.544	46.649	-16.272	32.544	model.01	5	40.355	47.986	-15.177	30.355	2.189	1	0.139	nsig	X276.1126_9.2	nHILIC	[M-H]-		Arginyl-Cysteine	HMDB0028706	NA	3
Single_Model	304.161	-2.01174	1.21933	-1.64988	0.098968		Anova	model.00	4	40.544	46.649	-16.272	32.544	model.01	5	38.66	46.292	-14.33	28.66	3.8832	1	0.04877	nsig	X304.1614_13.1	pHILIC	[M+H]+		Arginyl-Glutamic acid	HMDB0028708	NA	3
Single_Model	288.166	-0.017314	0.409287	-0.0423028	0.966257		Anova	model.00	4	40.544	46.649	-16.272	32.544	model.01	5	42.542	50.174	-16.271	32.542	0.0018	1	0.9663	nsig	X288.1664_9.1	pHILIC	[M+H]+		Arginyl-Hydroxyproline	HMDB0028710	NA	3
Single_Model	312.178	0.362922	0.371059	0.978071	0.328039		Anova	model.00	4	40.544	46.649	-16.272	32.544	model.01	5	41.436	49.068	-15.718	31.436	1.1074	1	0.2927	nsig	X312.1775_15.4	pHILIC	[M+H]+		Arginyl-Histidine	HMDB0028711	NA	3
Single_Model	288.203	-0.534356	1.10813	-0.482213	0.629654		Anova	model.00	4	40.544	46.649	-16.272	32.544	model.01	5	42.292	49.923	-16.146	32.292	0.2521	1	0.6156	nsig	X288.2028_9	pHILIC	[M+H]+		Arginyl-Isoleucine	HMDB0028712	NA	3
Single_Model	306.159	0.846531	0.520848	1.62529	0.1041		Anova	model.00	4	40.544	46.649	-16.272	32.544	model.01	5	38.477	46.109	-14.238	28.477	4.0669	1	0.04373	nsig	X306.1592_9.1	pHILIC	[M+H]+	0.792164	Arg-Met	HMDB0028715	NA	2
Single_Model	276.166	0.371665	1.13882	0.32636	0.744152		Anova	model.00	4	40.544	46.649	-16.272	32.544	model.01	5	42.437	50.069	-16.219	32.437	0.1065	1	0.7442	nsig	X276.1665_11.3	pHILIC	[M+H]+		Arginyl-Threonine	HMDB0028719	NA	3
Single_Model	274.187	0.75711	1.06529	0.710711	0.477263		Anova	model.00	4	40.544	46.649	-16.272	32.544	model.01	5	42.019	49.651	-16.009	32.019	0.5248	1	0.4688	nsig	X274.1871_10.5	pHILIC	[M+H]+		Arginyl-Valine	HMDB0028722	NA	3
Single_Model	289.162	-0.362067	0.370735	-0.976618	0.328758		Anova	model.00	4	40.544	46.649	-16.272	32.544	model.01	5	41.561	49.193	-15.78	31.561	0.9827	1	0.3215	nsig	X289.1617_11.6	pHILIC	[M+H]+	0.753744	Asn-Arg	HMDB0028725	NA	2
Single_Model	259.104	-0.51724	0.531354	-0.973437	0.330336		Anova	model.00	4	40.544	46.649	-16.272	32.544	model.01	5	41.406	49.038	-15.703	31.406	1.1379	1	0.2861	nsig	X259.1044_10.2	nHILIC	[M-H]-		Asparaginyl-Glutamine	HMDB0028729	NA	3
Single_Model	260.089	0.43523	0.490117	0.888012	0.374534		Anova	model.00	4	40.544	46.649	-16.272	32.544	model.01	5	41.634	49.266	-15.817	31.634	0.9094	1	0.3403	nsig	X260.0885_11.2	nHILIC	[M-H]-		Asparaginyl-Glutamic acid	HMDB0028730	NA	3
Single_Model	244.094	-1.3573	0.0157953	-85.9302	0		Anova	model.00	4	40.544	46.649	-16.272	32.544	model.01	5	40.445	48.077	-15.222	30.445	2.0989	1	0.1474	nsig	X244.0937_8.1	nHILIC	[M-H]-		Asparaginyl-Hydroxyproline	HMDB0028732	NA	3
Single_Model	244.13	-0.432397	0.617131	-0.700657	0.483517		Anova	model.00	4	40.544	46.649	-16.272	32.544	model.01	5	42.025	49.657	-16.013	32.025	0.5182	1	0.4716	nsig	X244.1301_8.1	nHILIC	[M-H]-		Asparaginyl-Isoleucine	HMDB0028734	NA	3
Single_Model	261.156	-0.633788	0.555685	-1.14055	0.254056		Anova	model.00	4	40.544	46.649	-16.272	32.544	model.01	5	41.103	48.734	-15.551	31.103	1.4411	1	0.23	nsig	X261.1556_12.3	pHILIC	[M+H]+	0.827854	Asn-Lys	HMDB0028736	NA	2
Single_Model	280.128	0.532789	0.31142	1.71084	0.0871106		Anova	model.00	4	40.544	46.649	-16.272	32.544	model.01	5	38.647	46.279	-14.323	28.647	3.8966	1	0.04838	nsig	X280.1279_0.9	pRPLC	[M+H]+		Asparaginyl-Phenylalanine	HMDB0028738	NA	3
Single_Model	228.099	0.808486	0.877787	0.92105	0.357024		Anova	model.00	4	40.544	46.649	-16.272	32.544	model.01	5	41.509	49.141	-15.755	31.509	1.0347	1	0.3091	nsig	X228.0989_10.7	nHILIC	[M-H]-		Asparaginyl-Proline	HMDB0028739	NA	3
Single_Model	218.078	0.22185	0.417093	0.531896	0.594798		Anova	model.00	4	40.544	46.649	-16.272	32.544	model.01	5	42.252	49.884	-16.126	32.252	0.2918	1	0.5891	nsig	X218.0781_10.1	nHILIC	[M-H]-		Asparaginyl-Serine	HMDB0028740	NA	3
Single_Model	232.094	-0.4721	0.836099	-0.564645	0.572315		Anova	model.00	4	40.544	46.649	-16.272	32.544	model.01	5	42.209	49.841	-16.105	32.209	0.3344	1	0.5631	nsig	X232.0938_9.5	nHILIC	[M-H]-		Asparaginyl-Threonine	HMDB0028741	NA	3
Single_Model	294.109	-0.665144	0.646088	-1.02949	0.303247		Anova	model.00	4	40.544	46.649	-16.272	32.544	model.01	5	41.259	48.891	-15.629	31.259	1.2848	1	0.257	nsig	X294.1093_8.3	nHILIC	[M-H]-		Asparaginyl-Tyrosine	HMDB0028743	NA	3
Single_Model	230.114	0.178439	0.375906	0.474691	0.635008		Anova	model.00	4	40.544	46.649	-16.272	32.544	model.01	5	42.318	49.95	-16.159	32.318	0.2255	1	0.6348	nsig	X230.1145_8.4	nHILIC	[M-H]-		Asparaginyl-Valine	HMDB0028744	NA	3
Single_Model	235.039	92.3497	5297227	1.74e-05	0.999986		Anova	model.00	4	40.544	46.649	-16.272	32.544	model.01	5	10	17.632	0	0	32.544	1	1.17e-08	nsig	X235.0393_7	nHILIC	[M-H]-		Aspartyl-Cysteine	HMDB0028750	NA	3
Single_Model	295.093	-0.336694	0.361186	-0.932188	0.351239		Anova	model.00	4	40.544	46.649	-16.272	32.544	model.01	5	41.551	49.182	-15.775	31.551	0.993	1	0.319	nsig	X295.0933_10.2	nHILIC	[M-H]-		Aspartyl-Tyrosine	HMDB0028765	NA	3
Single_Model	308.108	0.658489	0.502478	1.31048	0.190032		Anova	model.00	4	40.544	46.649	-16.272	32.544	model.01	5	40.545	48.177	-15.272	30.545	1.9988	1	0.1574	nsig	X308.1078_0.6	pRPLC	[M+H]+		Cysteinyl-Tryptophan	HMDB0028786	NA	3
Single_Model	282.12	0.806024	0.579789	1.3902	0.164467		Anova	model.00	4	40.544	46.649	-16.272	32.544	model.01	5	40.257	47.889	-15.129	30.257	2.2867	1	0.1305	nsig	X282.1205_10.5	nHILIC	[M-H]-	0.655612	Gln-His	HMDB0028799	NA	2
Single_Model	258.146	0.0140504	0.468208	0.0300088	0.97606		Anova	model.00	4	40.544	46.649	-16.272	32.544	model.01	5	42.543	50.175	-16.271	32.543	0.0009	1	0.9761	nsig	X258.1456_7.2	nHILIC	[M-H]-		Glutaminylisoleucine	HMDB0028800	NA	3
Single_Model	275.171	0.415941	1.46232	0.284439	0.776074		Anova	model.00	4	40.544	46.649	-16.272	32.544	model.01	5	42.459	50.091	-16.229	32.459	0.0848	1	0.7709	nsig	X275.1712_13.2	pHILIC	[M+H]+		Glutaminyllysine	HMDB0028802	NA	3
Single_Model	292.13	0.423311	0.4572	0.925875	0.354511		Anova	model.00	4	40.544	46.649	-16.272	32.544	model.01	5	41.669	49.301	-15.834	31.669	0.8749	1	0.3496	nsig	X292.13_6.7	nHILIC	[M-H]-		Glutaminylphenylalanine	HMDB0028804	NA	3
Single_Model	244.129	0.812725	0.853967	0.951705	0.341247		Anova	model.00	4	40.544	46.649	-16.272	32.544	model.01	5	41.625	49.257	-15.812	31.625	0.9186	1	0.3378	nsig	X244.1291_10.6	pHILIC	[M+H]+		Glutaminylproline	HMDB0028805	NA	3
Single_Model	310.139	-0.0483191	0.219559	-0.220074	0.825814		Anova	model.00	4	40.544	46.649	-16.272	32.544	model.01	5	42.495	50.126	-16.247	32.495	0.0491	1	0.8246	nsig	X310.1394_8.1	pHILIC	[M+H]+		Glutaminyltyrosine	HMDB0028809	NA	3
Single_Model	274.104	-0.108412	0.272141	-0.398367	0.69036		Anova	model.00	4	40.544	46.649	-16.272	32.544	model.01	5	42.388	50.02	-16.194	32.388	0.1552	1	0.6936	nsig	X274.1042_11	nHILIC	[M-H]-	0.75535	Glu-Gln	HMDB0028817	NA	2
Single_Model	285.119	-0.110478	0.524777	-0.210523	0.83326		Anova	model.00	4	40.544	46.649	-16.272	32.544	model.01	5	42.499	50.131	-16.25	32.499	0.0446	1	0.8328	nsig	X285.1192_11.8	pHILIC	[M+H]+		Glutamylhistidine	HMDB0028821	NA	3
Single_Model	243.098	0.146409	0.302051	0.484717	0.627877		Anova	model.00	4	40.544	46.649	-16.272	32.544	model.01	5	42.299	49.931	-16.15	32.299	0.2445	1	0.621	nsig	X243.0984_11.6	nHILIC	[M-H]-		Glutamylproline	HMDB0028827	NA	3
Single_Model	213.098	1.36572	0.919116	1.48591	0.137304		Anova	model.00	4	40.544	46.649	-16.272	32.544	model.01	5	40.146	47.778	-15.073	30.146	2.3973	1	0.1215	nsig	X213.0982_11.5	pHILIC	[M+H]+	0.81524	Gly-His	HMDB0028843	NA	2
Single_Model	205.064	-0.451706	0.371873	-1.21468	0.224488		Anova	model.00	4	40.544	46.649	-16.272	32.544	model.01	5	40.924	48.556	-15.462	30.924	1.6193	1	0.2032	nsig	X205.0644_9.2	nHILIC	[M-H]-		Glycyl-Methionine	HMDB0028847	NA	3
Single_Model	223.107	-0.175896	0.401857	-0.437707	0.661598		Anova	model.00	4	40.544	46.649	-16.272	32.544	model.01	5	42.349	49.981	-16.174	32.349	0.1949	1	0.6589	nsig	X223.1072_0.9	pRPLC	[M+H]+		Glycyl-Phenylalanine	HMDB0028848	NA	3
Single_Model	261.091	-0.140778	0.271991	-0.517583	0.604749		Anova	model.00	4	40.544	46.649	-16.272	32.544	model.01	5	42.267	49.899	-16.133	32.267	0.2768	1	0.5988	nsig	X261.0914_4.9	nHILIC	[M-H]-		Hydroxyprolyl-Methionine	HMDB0028869	NA	3
Single_Model	229.119	0.562017	0.378983	1.48296	0.138085		Anova	model.00	4	40.544	46.649	-16.272	32.544	model.01	5	39.85	47.482	-14.925	29.85	2.6939	1	0.1007	nsig	X229.1188_3.7	nRPLC	[M-H]-		Hydroxyprolyl-Valine	HMDB0028876	NA	3
Single_Model	271.103	0.303729	0.434863	0.698447	0.484898		Anova	model.00	4	40.544	46.649	-16.272	32.544	model.01	5	42.01	49.641	-16.005	32.01	0.534	1	0.4649	nsig	X271.1035_11.9	pHILIC	[M+H]+	0.674509	His-Asp	HMDB0028881	NA	2
Single_Model	283.105	0.629346	0.5833	1.07894	0.280614		Anova	model.00	4	40.544	46.649	-16.272	32.544	model.01	5	40.658	48.29	-15.329	30.658	1.8858	1	0.1697	nsig	X283.1046_11.4	nHILIC	[M-H]-	0.680326	His-Glu	HMDB0028884	NA	2
Single_Model	293.135	0.317733	0.98679	0.321987	0.747463		Anova	model.00	4	40.544	46.649	-16.272	32.544	model.01	5	42.432	50.064	-16.216	32.432	0.1119	1	0.738	nsig	X293.1355_11.3	pHILIC	[M+H]+	0.696843	His-His	HMDB0028887	NA	2
Single_Model	269.161	-0.0544379	0.338775	-0.16069	0.872337		Anova	model.00	4	40.544	46.649	-16.272	32.544	model.01	5	42.518	50.15	-16.259	32.518	0.0258	1	0.8723	nsig	X269.1607_7.6	pHILIC	[M+H]+		Histidinyl-Isoleucine	HMDB0028888	NA	3
Single_Model	287.116	0.225408	0.286505	0.786749	0.431429		Anova	model.00	4	40.544	46.649	-16.272	32.544	model.01	5	41.9	49.531	-15.95	31.9	0.6441	1	0.4222	nsig	X287.1159_7.9	pRPLC	[M+H]+		Histidinyl-Methionine	HMDB0028891	NA	3
Single_Model	301.13	0.285404	0.315239	0.905356	0.365277		Anova	model.00	4	40.544	46.649	-16.272	32.544	model.01	5	41.679	49.311	-15.84	31.679	0.8645	1	0.3525	nsig	X301.1304_6.8	nHILIC	[M-H]-		Histidinyl-Phenylalanine	HMDB0028892	NA	3
Single_Model	253.129	0.297493	0.291994	1.01883	0.308282		Anova	model.00	4	40.544	46.649	-16.272	32.544	model.01	5	41.42	49.052	-15.71	31.42	1.1232	1	0.2892	nsig	X253.1292_9.1	pHILIC	[M+H]+		Histidinyl-Proline	HMDB0028893	NA	3
Single_Model	255.145	0.871798	0.852803	1.02227	0.306651		Anova	model.00	4	40.544	46.649	-16.272	32.544	model.01	5	41.24	48.872	-15.62	31.24	1.3038	1	0.2535	nsig	X255.1449_8.5	pHILIC	[M+H]+	0.711202	His-Val	HMDB0028898	NA	2
Single_Model	260.16	0.303629	0.306881	0.989403	0.322466		Anova	model.00	4	40.544	46.649	-16.272	32.544	model.01	5	41.392	49.023	-15.696	31.392	1.152	1	0.2831	nsig	X260.1603_7.3	pHILIC	[M+H]+	0.739513	Ile-Gln	HMDB0028905	NA	2
Single_Model	261.144	0.536061	0.670122	0.799945	0.423742		Anova	model.00	4	40.544	46.649	-16.272	32.544	model.01	5	41.887	49.519	-15.944	31.887	0.6564	1	0.4178	nsig	X261.1445_9.7	pHILIC	[M+H]+	0.772497	Ile-Glu	HMDB0028906	NA	2
Single_Model	245.186	0.584306	0.375401	1.55649	0.119592		Anova	model.00	4	40.544	46.649	-16.272	32.544	model.01	5	39.653	47.284	-14.826	29.653	2.8911	1	0.08907	nsig	X245.186_1	pHILIC	[M+H]+		Isoleucyl-Isoleucine	HMDB0028910	NA	3
Single_Model	293.151	0.00463383	0.346853	0.0133596	0.989341		Anova	model.00	4	40.544	46.649	-16.272	32.544	model.01	5	42.543	50.175	-16.272	32.543	0.0002	1	0.9893	nsig	X293.1505_5.7	nHILIC	[M-H]-		Isoleucyl-Tyrosine	HMDB0028919	NA	3
Single_Model	229.156	0.593146	0.482036	1.2305	0.218509		Anova	model.00	4	40.544	46.649	-16.272	32.544	model.01	5	40.91	48.542	-15.455	30.91	1.6334	1	0.2012	nsig	X229.1556_4.9	nHILIC	[M-H]-	0.776207	Ile-Val	HMDB0028920	NA	2
Single_Model	218.15	1.48385	0.536303	2.76681	0.00566069		Anova	model.00	4	40.544	46.649	-16.272	32.544	model.01	5	39.802	47.434	-14.901	29.802	2.7419	1	0.09775	nsig	X218.1499_14.5	pHILIC	[M+H]+	0.860321	Lys-Ala	HMDB0028944	NA	2
Single_Model	262.14	2.27336	1.17401	1.9364	0.052819		Anova	model.00	4	40.544	46.649	-16.272	32.544	model.01	5	37.302	44.934	-13.651	27.302	5.2418	1	0.02205	nsig	X262.1396_14.1	pHILIC	[M+H]+	0.835615	Lys-Asp	HMDB0028947	NA	2
Single_Model	204.134	-0.271421	0.629398	-0.431239	0.666295		Anova	model.00	4	40.544	46.649	-16.272	32.544	model.01	5	42.355	49.987	-16.177	32.355	0.1886	1	0.6641	nsig	X204.1342_15.2	pHILIC	[M+H]+	0.827205	Lys-Gly	HMDB0028951	NA	2
Single_Model	260.197	-0.546823	1.45636	-0.375472	0.70731		Anova	model.00	4	40.544	46.649	-16.272	32.544	model.01	5	42.389	50.021	-16.195	32.389	0.1547	1	0.6941	nsig	X260.1967_10.1	pHILIC	[M+H]+	0.729651	Lys-Ile	HMDB0028954	NA	2
Single_Model	278.153	0.154172	0.779295	0.197835	0.843174		Anova	model.00	4	40.544	46.649	-16.272	32.544	model.01	5	42.504	50.136	-16.252	32.504	0.0395	1	0.8425	nsig	X278.1532_11.2	pHILIC	[M+H]+	0.748362	Lys-Met	HMDB0028957	NA	2
Single_Model	294.181	0.0938687	0.297088	0.315963	0.752031		Anova	model.00	4	40.544	46.649	-16.272	32.544	model.01	5	42.437	50.069	-16.219	32.437	0.1064	1	0.7443	nsig	X294.181_8.6	pHILIC	[M+H]+		Lysyl-Phenylalanine	HMDB0028958	NA	3
Single_Model	242.151	0.416283	0.307812	1.35239	0.176249		Anova	model.00	4	40.544	46.649	-16.272	32.544	model.01	5	40.99	48.622	-15.495	30.99	1.5535	1	0.2126	nsig	X242.151_16.2	nHILIC	[M-H]-		Lysyl-Proline	HMDB0028959	NA	3
Single_Model	232.13	-0.0572088	0.207589	-0.275586	0.782866		Anova	model.00	4	40.544	46.649	-16.272	32.544	model.01	5	42.467	50.098	-16.233	32.467	0.077	1	0.7813	nsig	X232.1303_14.4	nHILIC	[M-H]-		Lysyl-Serine	HMDB0028960	NA	3
Single_Model	246.181	-0.173259	0.451211	-0.383986	0.700989		Anova	model.00	4	40.544	46.649	-16.272	32.544	model.01	5	42.397	50.029	-16.198	32.397	0.1468	1	0.7017	nsig	X246.1812_11.7	pHILIC	[M+H]+		Lysyl-Valine	HMDB0028964	NA	3
Single_Model	235.075	-0.286244	0.374521	-0.764294	0.444692		Anova	model.00	4	40.544	46.649	-16.272	32.544	model.01	5	41.941	49.573	-15.97	31.941	0.6028	1	0.4375	nsig	X235.0749_9.2	nHILIC	[M-H]-		Methionyl-Serine	HMDB0028982	NA	3
Single_Model	249.127	-0.00926416	0.302964	-0.0305785	0.975606		Anova	model.00	4	40.544	46.649	-16.272	32.544	model.01	5	42.543	50.175	-16.271	32.543	0.0009	1	0.9756	nsig	X249.1266_5.3	pHILIC	[M+H]+		Methionyl-Valine	HMDB0028986	NA	3
Single_Model	322.187	0.272133	0.405107	0.671755	0.50174		Anova	model.00	4	40.544	46.649	-16.272	32.544	model.01	5	41.957	49.589	-15.979	31.957	0.5866	1	0.4437	nsig	X322.1872_8.9	pHILIC	[M+H]+	0.739596	Phe-Arg	HMDB0028989	NA	2
Single_Model	265.119	0.0243536	0.444096	0.0548386	0.956267		Anova	model.00	4	40.544	46.649	-16.272	32.544	model.01	5	42.541	50.172	-16.27	32.541	0.003	1	0.9564	nsig	X265.1192_5.5	nHILIC	[M-H]-		Phenylalanyl-Threonine	HMDB0029005	NA	3
Single_Model	329.148	0.532361	0.337371	1.57797	0.114573		Anova	model.00	4	40.544	46.649	-16.272	32.544	model.01	5	39.19	46.822	-14.595	29.19	3.3534	1	0.06706	nsig	X329.1484_3.2	pRPLC	[M+H]+		Phenylalanyl-Tyrosine	HMDB0029007	NA	3
Single_Model	185.093	2.21683	1.36823	1.62022	0.105185		Anova	model.00	4	40.544	46.649	-16.272	32.544	model.01	5	39.96	47.592	-14.98	29.96	2.5832	1	0.108	nsig	X185.093_9.6	nHILIC	[M-H]-	0.665172	Pro-Ala	HMDB0029010	NA	2
Single_Model	272.171	-0.423906	1.13271	-0.374242	0.708224		Anova	model.00	4	40.544	46.649	-16.272	32.544	model.01	5	42.395	50.027	-16.198	32.395	0.1485	1	0.7	nsig	X272.1715_15	pHILIC	[M+H]+		Prolyl-Arginine	HMDB0029011	NA	2
Single_Model	229.083	-0.0382004	0.220471	-0.173267	0.862441		Anova	model.00	4	40.544	46.649	-16.272	32.544	model.01	5	42.514	50.145	-16.257	32.514	0.0302	1	0.8621	nsig	X229.0829_11.8	nHILIC	[M-H]-	0.698292	Pro-Asp	HMDB0029013	NA	2
Single_Model	253.129	0.418108	0.918436	0.455239	0.648937		Anova	model.00	4	40.544	46.649	-16.272	32.544	model.01	5	42.336	49.968	-16.168	32.336	0.2074	1	0.6488	nsig	X253.1294_11.4	pHILIC	[M+H]+	0.802407	Pro-His	HMDB0029019	NA	2
Single_Model	244.165	-0.809468	1.08797	-0.744018	0.456866		Anova	model.00	4	40.544	46.649	-16.272	32.544	model.01	5	41.982	49.614	-15.991	31.982	0.5616	1	0.4536	nsig	X244.1654_16.2	pHILIC	[M+H]+	0.738037	Pro-Lys	HMDB0029022	NA	2
Single_Model	217.118	0.270423	0.33325	0.811471	0.417095		Anova	model.00	4	40.544	46.649	-16.272	32.544	model.01	5	41.882	49.514	-15.941	31.882	0.6617	1	0.416	nsig	X217.1177_0.6	pRPLC	[M+H]+		Prolyl-Threonine	HMDB0029027	NA	3
Single_Model	215.139	0.366282	0.625902	0.585207	0.558409		Anova	model.00	4	40.544	46.649	-16.272	32.544	model.01	5	42.21	49.842	-16.105	32.21	0.3338	1	0.5634	nsig	X215.139_7.5	pHILIC	[M+H]+	0.653196	Pro-Val	HMDB0029030	NA	2
Single_Model	267.098	-1.98677	1.38152	-1.4381	0.150405		Anova	model.00	4	40.544	46.649	-16.272	32.544	model.01	5	36.986	44.618	-13.493	26.986	5.5576	1	0.0184	nsig	X267.0984_8.2	nHILIC	[M-H]-		Seryltyrosine	HMDB0029051	NA	3
Single_Model	191.103	0.0244148	0.480413	0.0508203	0.959469		Anova	model.00	4	40.544	46.649	-16.272	32.544	model.01	5	42.541	50.173	-16.27	32.541	0.0026	1	0.9595	nsig	X191.1026_1.7	pHILIC	[M+H]+	0.662585	Thr-Ala	HMDB0029054	NA	2
Single_Model	177.087	1.10593	1.39132	0.794877	0.426685		Anova	model.00	4	40.544	46.649	-16.272	32.544	model.01	5	41.057	48.689	-15.529	31.057	1.4865	1	0.2228	nsig	X177.0869_9.1	pHILIC	[M+H]+	0.653334	Thr-Gly	HMDB0029061	NA	2
Single_Model	231.135	0.278984	0.594514	0.469264	0.638881		Anova	model.00	4	40.544	46.649	-16.272	32.544	model.01	5	42.323	49.955	-16.162	32.323	0.2203	1	0.6388	nsig	X231.1349_6.1	nHILIC	[M-H]-	0.719176	Thr-Leu	HMDB0029065	NA	2
Single_Model	248.16	-0.487509	0.467632	-1.04251	0.297177		Anova	model.00	4	40.544	46.649	-16.272	32.544	model.01	5	41.376	49.008	-15.688	31.376	1.1673	1	0.28	nsig	X248.1604_12.2	pHILIC	[M+H]+	0.833219	Thr-Lys	HMDB0029066	NA	2
Single_Model	281.114	0.0635799	0.214076	0.296998	0.766468		Anova	model.00	4	40.544	46.649	-16.272	32.544	model.01	5	42.454	50.085	-16.227	32.454	0.0901	1	0.764	nsig	X281.1141_7.1	nHILIC	[M-H]-		Threoninyl-Tyrosine	HMDB0029073	NA	3
Single_Model	253.118	0.445346	0.339084	1.31338	0.189054		Anova	model.00	4	40.544	46.649	-16.272	32.544	model.01	5	40.444	48.076	-15.222	30.444	2.0997	1	0.1473	nsig	X253.1182_1.3	pHILIC	[M+H]+	0.681576	Tyr-Ala	HMDB0029098	NA	2
Single_Model	308.125	0.422424	0.6018	0.701934	0.48272		Anova	model.00	4	40.544	46.649	-16.272	32.544	model.01	5	42.042	49.674	-16.021	32.042	0.5013	1	0.4789	nsig	X308.125_8.1	nHILIC	[M-H]-	0.769566	Tyr-Gln	HMDB0029103	NA	2
Single_Model	317.125	0.431994	0.388451	1.1121	0.266097		Anova	model.00	4	40.544	46.649	-16.272	32.544	model.01	5	41.228	48.86	-15.614	31.228	1.3154	1	0.2514	nsig	X317.1254_8.3	nHILIC	[M-H]-	0.694224	Tyr-His	HMDB0029107	NA	2
Single_Model	295.164	0.111845	0.317268	0.352525	0.724445		Anova	model.00	4	40.544	46.649	-16.272	32.544	model.01	5	42.416	50.048	-16.208	32.416	0.1279	1	0.7207	nsig	X295.1642_2.5	pRPLC	[M+H]+	0.784234	Tyr-Leu	HMDB0029109	NA	2
Single_Model	279.135	0.260097	0.46816	0.555572	0.578503		Anova	model.00	4	40.544	46.649	-16.272	32.544	model.01	5	42.233	49.865	-16.117	32.233	0.3102	1	0.5775	nsig	X279.1348_5.8	nHILIC	[M-H]-		Tyrosyl-Valine	HMDB0029118	NA	3
Single_Model	189.123	0.296577	0.429821	0.690002	0.490193		Anova	model.00	4	40.544	46.649	-16.272	32.544	model.01	5	42.059	49.69	-16.029	32.059	0.4852	1	0.4861	nsig	X189.1232_6.9	pHILIC	[M+H]+	0.652203	Val-Ala	HMDB0029120	NA	2
Single_Model	231.099	0.658771	0.519974	1.26693	0.20518		Anova	model.00	4	40.544	46.649	-16.272	32.544	model.01	5	39.68	47.311	-14.84	29.68	2.8641	1	0.09057	nsig	X231.0985_10.5	nHILIC	[M-H]-	0.843388	Val-Asp	HMDB0029123	NA	2
Single_Model	253.131	-0.547633	0.482859	-1.13415	0.256733		Anova	model.00	4	40.544	46.649	-16.272	32.544	model.01	5	40.712	48.343	-15.356	30.712	1.832	1	0.1759	nsig	X253.1305_8.5	nHILIC	[M-H]-	0.788739	Val-His	HMDB0029129	NA	2
Single_Model	231.17	0.483921	0.74017	0.653798	0.513242		Anova	model.00	4	40.544	46.649	-16.272	32.544	model.01	5	42.106	49.738	-16.053	32.106	0.4372	1	0.5085	nsig	X231.1703_4.8	pHILIC	[M+H]+	0.78648	Val-Ile	HMDB0029130	NA	2
Single_Model	231.17	0.423527	0.426647	0.992687	0.320863		Anova	model.00	4	40.544	46.649	-16.272	32.544	model.01	5	41.476	49.107	-15.738	31.476	1.068	1	0.3014	nsig	X231.1698_1.5	pRPLC	[M+H]+	0.818419	Val-Leu	HMDB0029131	NA	2
Single_Model	203.104	0.182318	0.588018	0.310056	0.756518		Anova	model.00	4	40.544	46.649	-16.272	32.544	model.01	5	42.447	50.079	-16.223	32.447	0.0968	1	0.7557	nsig	X203.1037_7.8	nHILIC	[M-H]-	0.788263	Val-Ser	HMDB0029136	NA	2
Single_Model	369.064	-0.628382	0.507265	-1.23876	0.215433		Anova	model.00	4	40.544	46.649	-16.272	32.544	model.01	5	40.851	48.483	-15.425	30.851	1.6926	1	0.1933	nsig	X369.0643_6.5	pHILIC	[M+H]+		3'-O-Methyl-(-)-epicatechin-7-O-sulphate	HMDB0029177	NA	3
Single_Model	289.039	-0.473714	0.390468	-1.2132	0.225055		Anova	model.00	4	40.544	46.649	-16.272	32.544	model.01	5	40.962	48.594	-15.481	30.962	1.5812	1	0.2086	nsig	X289.0388_12	pHILIC	[M+H]+		5'-(3',4'-Dihydroxyphenyl)-gamma-valerolactone sulfate	HMDB0029191	NA	3
Single_Model	273.007	-0.0547727	0.25627	-0.213731	0.830757		Anova	model.00	4	40.544	46.649	-16.272	32.544	model.01	5	42.498	50.13	-16.249	32.498	0.0452	1	0.8316	nsig	X273.0074_4.7	nRPLC	[M-H]-		Ferulic acid 4-sulfate	HMDB0029200	NA	3
Single_Model	231.031	0.755284	0.458736	1.64645	0.0996719		Anova	model.00	4	40.544	46.649	-16.272	32.544	model.01	5	38.045	45.676	-14.022	28.045	4.499	1	0.03391	nsig	X231.0313_13.3	nHILIC	[M-H]-		Thorium	HMDB0029215	C19157	3
Single_Model	303.125	-1.39489	0.715569	-1.94935	0.0512541		Anova	model.00	4	40.544	46.649	-16.272	32.544	model.01	5	36.546	44.178	-13.273	26.546	5.9972	1	0.01433	nsig	X303.1246_9.6	nHILIC	[M-H]-		p-HPEA-EDA	HMDB0029305	NA	3
Single_Model	295.097	-1.53473	1.09167	-1.40586	0.159766		Anova	model.00	4	40.544	46.649	-16.272	32.544	model.01	5	40.275	47.907	-15.137	30.275	2.2689	1	0.132	nsig	X295.0973_6	pRPLC	[M+H]+		7-Acetoxy-2-methylisoflavone	HMDB0029364	NA	3
Single_Model	160.097	0.420447	0.761886	0.55185	0.581051		Anova	model.00	4	40.544	46.649	-16.272	32.544	model.01	5	42.239	49.871	-16.12	32.239	0.3044	1	0.5811	nsig	X160.0968_7.7	pHILIC	[M+H]+	0.834674	Betonicine	HMDB0029412	C08269	1
Single_Model	271.129	0.265943	0.205822	1.2921	0.196322		Anova	model.00	4	40.544	46.649	-16.272	32.544	model.01	5	40.656	48.287	-15.328	30.656	1.8881	1	0.1694	nsig	X271.1287_10.6	pHILIC	[M+H]+		Hypoglycin B	HMDB0029428	C08280	3
Single_Model	201.052	0.130115	0.516976	0.251686	0.801284		Anova	model.00	4	40.544	46.649	-16.272	32.544	model.01	5	42.478	50.11	-16.239	32.478	0.0657	1	0.7976	nsig	X201.0517_11.1	nHILIC	[M-H]-		Penmacric acid	HMDB0029436	NA	3
Single_Model	180.069	-0.318233	0.336597	-0.945443	0.344433		Anova	model.00	4	40.544	46.649	-16.272	32.544	model.01	5	41.606	49.237	-15.803	31.606	0.938	1	0.3328	nsig	X180.0688_1.5	pHILIC	[M+H]+		(R)C(R)S-S-Propylcysteine sulfoxide	HMDB0029442	NA	3
Single_Model	233.116	-0.517113	0.565852	-0.913866	0.360787		Anova	model.00	4	40.544	46.649	-16.272	32.544	model.01	5	41.582	49.214	-15.791	31.582	0.9618	1	0.3267	nsig	X233.1164_6.2	pRPLC	[M+H]+		Marindinin	HMDB0029504	NA	3
Single_Model	421.166	0.0783777	0.219996	0.356269	0.721639		Anova	model.00	4	40.544	46.649	-16.272	32.544	model.01	5	42.413	50.045	-16.207	32.413	0.1305	1	0.7179	nsig	X421.1661_8.7	pRPLC	[M+H]+		Kuwanon A	HMDB0029505	NA	3
Single_Model	345.06	-0.101739	0.350325	-0.290413	0.7715		Anova	model.00	4	40.544	46.649	-16.272	32.544	model.01	5	42.459	50.091	-16.23	32.459	0.0845	1	0.7712	nsig	X345.0604_4.5	nRPLC	[M-H]-		Limocitrin	HMDB0029516	NA	3
Single_Model	249.112	-0.254026	0.532053	-0.477445	0.633046		Anova	model.00	4	40.544	46.649	-16.272	32.544	model.01	5	42.303	49.934	-16.151	32.303	0.2411	1	0.6234	nsig	X249.1115_7.1	pRPLC	[M+H]+		(+)-cis-5,6-Dihydro-5-hydroxy-4-methoxy-6-(2-phenylethyl)-2H-pyran-2-one	HMDB0029575	NA	3
Single_Model	281.046	-0.352771	0.340454	-1.03618	0.300119		Anova	model.00	4	40.544	46.649	-16.272	32.544	model.01	5	41.402	49.034	-15.701	31.402	1.1416	1	0.2853	nsig	X281.0458_6.3	nHILIC	[M-H]-		3-O-Methylcoumestrol	HMDB0029584	NA	3
Single_Model	217.072	-0.111793	0.349586	-0.319788	0.749129		Anova	model.00	4	40.544	46.649	-16.272	32.544	model.01	5	42.441	50.073	-16.221	32.441	0.1024	1	0.749	nsig	X217.0716_10.9	nHILIC	[M-H]-		Triacetin	HMDB0029592	NA	3
Single_Model	367.104	0.241853	0.498287	0.485369	0.627414		Anova	model.00	4	40.544	46.649	-16.272	32.544	model.01	5	42.294	49.926	-16.147	32.294	0.2496	1	0.6174	nsig	X367.1037_8.6	pRPLC	[M+H]+		Furocoumarinic acid glucoside	HMDB0029601	NA	3
Single_Model	283.101	-0.115261	0.248684	-0.463486	0.643016		Anova	model.00	4	40.544	46.649	-16.272	32.544	model.01	5	42.324	49.955	-16.162	32.324	0.2202	1	0.6389	nsig	X283.1012_10.2	pHILIC	[M+H]+		Arabinopyranobiose	HMDB0029619	NA	3
Single_Model	397.224	-0.0365248	0.768579	-0.0475225	0.962097		Anova	model.00	4	40.544	46.649	-16.272	32.544	model.01	5	42.541	50.173	-16.271	32.541	0.0023	1	0.9621	nsig	X397.2238_9.7	pRPLC	[M+H]+		Isopetasoside	HMDB0029622	NA	3
Single_Model	359.134	-0.0285024	0.39732	-0.0717366	0.942812		Anova	model.00	4	40.544	46.649	-16.272	32.544	model.01	5	42.539	50.17	-16.269	32.539	0.0051	1	0.9429	nsig	X359.1335_6.8	pRPLC	[M+H]+		Phlorisobutyrophenone 2-glucoside	HMDB0029651	NA	3
Single_Model	431.243	-0.137128	0.328849	-0.416996	0.676682		Anova	model.00	4	40.544	46.649	-16.272	32.544	model.01	5	42.368	49.999	-16.184	32.368	0.176	1	0.6749	nsig	X431.2434_9.2	nRPLC	[M-H]-		Erinacine E	HMDB0029656	NA	3
Single_Model	315.107	0.193214	0.678333	0.284836	0.77577		Anova	model.00	4	40.544	46.649	-16.272	32.544	model.01	5	42.462	50.094	-16.231	32.462	0.0819	1	0.7748	nsig	X315.1074_5.6	pRPLC	[M+H]+		Vanilloside	HMDB0029664	NA	3
Single_Model	181.992	-0.58663	0.328917	-1.78352	0.0745014		Anova	model.00	4	40.544	46.649	-16.272	32.544	model.01	5	39.908	47.54	-14.954	29.908	2.6353	1	0.1045	nsig	X181.9917_1.4	nHILIC	[M-H]-	0.826479	Saccharin	HMDB0029723	C12283	2
Single_Model	241.049	-0.48571	0.373969	-1.2988	0.194013		Anova	model.00	4	40.544	46.649	-16.272	32.544	model.01	5	40.688	48.32	-15.344	30.688	1.8553	1	0.1732	nsig	X241.0495_4.5	pHILIC	[M+H]+		Dantron	HMDB0029752	C10312	3
Single_Model	329.159	0.00285757	0.321783	0.00888043	0.992915		Anova	model.00	4	40.544	46.649	-16.272	32.544	model.01	5	42.544	50.175	-16.272	32.544	0.0001	1	0.9929	nsig	X329.1587_10.4	pRPLC	[M+H]+		Cymorcin monoglucoside	HMDB0029777	NA	3
Single_Model	285.134	0.646291	0.452741	1.42751	0.153433		Anova	model.00	4	40.544	46.649	-16.272	32.544	model.01	5	40.11	47.742	-15.055	30.11	2.4332	1	0.1188	nsig	X285.1344_2	pHILIC	[M+H]+		2-Phenylethyl beta-D-glucopyranoside	HMDB0029819	NA	3
Single_Model	167.104	-0.461812	0.383223	-1.20507	0.228176		Anova	model.00	4	40.544	46.649	-16.272	32.544	model.01	5	40.951	48.583	-15.475	30.951	1.5928	1	0.2069	nsig	X167.1037_15.5	pHILIC	[M+H]+	0.74922	Cyromazine	HMDB0029862	C14147	2
Single_Model	207.102	-2.39391	1.33043	-1.79936	0.0719625		Anova	model.00	4	40.544	46.649	-16.272	32.544	model.01	5	37.729	45.36	-13.864	27.729	4.8151	1	0.02821	nsig	X207.1023_7.4	nRPLC	[M-H]-		Isoelemicin	HMDB0029867	C16975	3
Single_Model	307.101	0.132876	0.258879	0.513274	0.60776		Anova	model.00	4	40.544	46.649	-16.272	32.544	model.01	5	42.273	49.905	-16.136	32.273	0.2708	1	0.6028	nsig	X307.101_11.8	pHILIC	[M+H]+		Starch acetate	HMDB0029891	NA	3
Single_Model	241.093	-2.91375	1.51167	-1.9275	0.0539179		Anova	model.00	4	40.544	46.649	-16.272	32.544	model.01	5	38.247	45.879	-14.124	28.247	4.2963	1	0.0382	nsig	X241.0926_9.2	nHILIC	[M-H]-		D-erythro-D-galacto-octitol	HMDB0029953	NA	3
Single_Model	465.227	0.0623335	0.477212	0.13062	0.896076		Anova	model.00	4	40.544	46.649	-16.272	32.544	model.01	5	42.526	50.158	-16.263	32.526	0.0174	1	0.8951	nsig	X465.2273_12	pHILIC	[M+H]+		Dulciol B	HMDB0029989	NA	3
Single_Model	473.218	-0.164681	0.362205	-0.454662	0.649353		Anova	model.00	4	40.544	46.649	-16.272	32.544	model.01	5	42.336	49.968	-16.168	32.336	0.2072	1	0.6489	nsig	X473.2176_8.8	nRPLC	[M-H]-		Austalide B	HMDB0030004	NA	3
Single_Model	137.037	-0.771207	0.494475	-1.55965	0.118843		Anova	model.00	4	40.544	46.649	-16.272	32.544	model.01	5	39.521	47.152	-14.76	29.521	3.0231	1	0.08209	nsig	X137.0374_3.4	nRPLC	[M-H]-	0.771449	4-Imidazoleacrylic acid	HMDB00301	C00785	2
Single_Model	627.189	0.162155	0.413182	0.392454	0.694723		Anova	model.00	4	40.544	46.649	-16.272	32.544	model.01	5	42.37	50.002	-16.185	32.37	0.1736	1	0.6769	nsig	X627.1892_10.4	pRPLC	[M+H]+		Kuwanon L	HMDB0030121	NA	3
Single_Model	569.178	-0.482261	0.377298	-1.2782	0.20118		Anova	model.00	4	40.544	46.649	-16.272	32.544	model.01	5	41.206	48.838	-15.603	31.206	1.3372	1	0.2475	nsig	X569.1778_10.3	pRPLC	[M+H]+		Asticolorin C	HMDB0030135	NA	3
Single_Model	425.196	1.3629	0.717931	1.89837	0.0576472		Anova	model.00	4	40.544	46.649	-16.272	32.544	model.01	5	37.42	45.051	-13.71	27.42	5.1241	1	0.0236	nsig	X425.1961_11.7	pRPLC	[M+H]+		Glisoflavanone	HMDB0030149	NA	3
Single_Model	519.259	0.0160922	0.225781	0.0712732	0.94318		Anova	model.00	4	40.544	46.649	-16.272	32.544	model.01	5	42.539	50.17	-16.269	32.539	0.0051	1	0.9432	nsig	X519.2587_9.8	pRPLC	[M+H]+		Austalide G	HMDB0030154	NA	3
Single_Model	399.216	-0.31391	0.812294	-0.386449	0.699164		Anova	model.00	4	40.544	46.649	-16.272	32.544	model.01	5	42.391	50.022	-16.195	32.391	0.1531	1	0.6956	nsig	X399.2159_10.8	pRPLC	[M+H]+		Galbanic acid	HMDB0030163	NA	3
Single_Model	280.132	0.047133	0.194776	0.241986	0.808791		Anova	model.00	4	40.544	46.649	-16.272	32.544	model.01	5	42.485	50.116	-16.242	32.485	0.0591	1	0.808	nsig	X280.1324_13.5	pHILIC	[M+H]+		(E,E)-N-4-Methoxystyrylcinnamide	HMDB0030194	NA	3
Single_Model	98.0248	-0.402776	0.86605	-0.465072	0.64188		Anova	model.00	4	40.544	46.649	-16.272	32.544	model.01	5	42.33	49.962	-16.165	32.33	0.2139	1	0.6438	nsig	X98.0248_8.1	nHILIC	[M-H]-		(R)-Dihydromaleimide	HMDB0030276	NA	3
Single_Model	322.143	-0.176911	0.136465	-1.29638	0.194843		Anova	model.00	4	40.544	46.649	-16.272	32.544	model.01	5	40.742	48.373	-15.371	30.742	1.8021	1	0.1795	nsig	X322.1429_2.7	pHILIC	[M+H]+		2-[4-(3,4-Methylenedioxyphenyl)butyl]-4(1H)-quinolinone	HMDB0030382	NA	3
Single_Model	353.089	-1.07842	1.08843	-0.990802	0.321782		Anova	model.00	4	40.544	46.649	-16.272	32.544	model.01	5	41.4	49.031	-15.7	31.4	1.144	1	0.2848	nsig	X353.0885_8.3	pRPLC	[M+H]+		N-(Carbethoxyacetyl)-4-chloro-L-tryptophan	HMDB0030399	NA	3
Single_Model	401.24	0.166959	0.372156	0.448626	0.653701		Anova	model.00	4	40.544	46.649	-16.272	32.544	model.01	5	42.34	49.972	-16.17	32.34	0.2039	1	0.6516	nsig	X401.2405_5.7	nHILIC	[M-H]-		Merodesmosine	HMDB0030407	NA	3
Single_Model	206.049	-0.538601	0.422577	-1.27456	0.202465		Anova	model.00	4	40.544	46.649	-16.272	32.544	model.01	5	40.73	48.362	-15.365	30.73	1.8133	1	0.1781	nsig	X206.0493_7.7	nHILIC	[M-H]-		(2R,2'S)-Isobuteine	HMDB0030411	NA	3
Single_Model	321.13	0.0805719	0.318745	0.252778	0.800439		Anova	model.00	4	40.544	46.649	-16.272	32.544	model.01	5	42.48	50.112	-16.24	32.48	0.0637	1	0.8007	nsig	X321.1302_10.2	nHILIC	[M-H]-		Avenic acid A	HMDB0030416	NA	3
Single_Model	581.32	-0.323541	0.302108	-1.07094	0.284195		Anova	model.00	4	40.544	46.649	-16.272	32.544	model.01	5	41.731	49.363	-15.866	31.731	0.8122	1	0.3675	nsig	X581.3198_10	pRPLC	[M+H]+		Hordatine B	HMDB0030459	C08308	3
Single_Model	307.154	-0.0370149	0.33141	-0.111689	0.91107		Anova	model.00	4	40.544	46.649	-16.272	32.544	model.01	5	42.531	50.163	-16.265	32.531	0.0126	1	0.9105	nsig	X307.1543_8.3	nRPLC	[M-H]-		ACRL Toxin II	HMDB0030496	NA	3
Single_Model	405.19	-0.526848	0.407369	-1.29329	0.19591		Anova	model.00	4	40.544	46.649	-16.272	32.544	model.01	5	40.61	48.242	-15.305	30.61	1.9334	1	0.1644	nsig	X405.1904_2.6	pHILIC	[M+H]+		(2S,4R,6S)-2-[2-(4-hydroxy-3-methoxyphenyl)ethyl]tetrahydro-6-(4-hydroxy-3,5-dimethoxyphenyl)-2H-pyran-4-ol	HMDB0030504	NA	3
Single_Model	203.143	-1.18932	0.0152415	-78.0318	0		Anova	model.00	4	40.544	46.649	-16.272	32.544	model.01	5	38.979	46.611	-14.49	28.979	3.5646	1	0.05903	nsig	X203.1425_10	pRPLC	[M+H]+		(±)-Anisoxide	HMDB0030572	NA	3
Single_Model	325.107	7.75713	4.50639	1.72136	0.0851848		Anova	model.00	4	40.544	46.649	-16.2718	32.544	model.01	5	18.317	25.949	-4.1584	8.317	24.227	1	8.56e-07	nsig	X325.1073_6.2	nHILIC	[M-H]-		1,5-Dihydroxy-3-methoxy-2-prenylxanthone	HMDB0030605	NA	3
Single_Model	613.048	-0.30296	0.327786	-0.92426	0.355351		Anova	model.00	4	40.544	46.649	-16.272	32.544	model.01	5	41.621	49.253	-15.811	31.621	0.9224	1	0.3369	nsig	X613.0479_4.3	nRPLC	[M-H]-		Castacrenin A	HMDB0030625	NA	3
Single_Model	365.209	0.222534	0.295081	0.754145	0.450762		Anova	model.00	4	40.544	46.649	-16.272	32.544	model.01	5	41.943	49.575	-15.972	31.943	0.6003	1	0.4385	nsig	X365.2093_3	pRPLC	[M+H]+		3-(1,1-Dimethyl-2-propenyl)-8-(3-methyl-2-butenyl)xanthyletin	HMDB0030730	NA	3
Single_Model	515.283	-0.0625528	0.358502	-0.174484	0.861485		Anova	model.00	4	40.544	46.649	-16.272	32.544	model.01	5	42.513	50.145	-16.256	32.513	0.0306	1	0.861	nsig	X515.2827_9.6	pRPLC	[M+H]+		Capsianoside V	HMDB0030737	NA	3
Single_Model	205.087	-1.30653	0.69734	-1.87358	0.0609879		Anova	model.00	4	40.544	46.649	-16.272	32.544	model.01	5	37.608	45.24	-13.804	27.608	4.9353	1	0.02631	nsig	X205.087_6.9	nRPLC	[M-H]-		Ethyl trans-p-methoxycinnamate	HMDB0030762	C10476	3
Single_Model	385.166	-1.33399	0.86843	-1.53609	0.124517		Anova	model.00	4	40.544	46.649	-16.272	32.544	model.01	5	35.551	43.182	-12.775	25.551	6.993	1	0.008183	nsig	X385.166_1.5	nHILIC	[M-H]-		Porson	HMDB0030810	NA	3
Single_Model	358.078	-0.0102898	0.295029	-0.0348774	0.972178		Anova	model.00	4	40.544	46.649	-16.272	32.544	model.01	5	42.542	50.174	-16.271	32.542	0.0012	1	0.972	nsig	X358.0778_7.2	nHILIC	[M-H]-		Triglochinin	HMDB0030934	C08342	3
Single_Model	267.233	-0.704781	0.539339	-1.30675	0.191298		Anova	model.00	4	40.544	46.649	-16.272	32.544	model.01	5	40.682	48.314	-15.341	30.682	1.8618	1	0.1724	nsig	X267.2327_0.9	nHILIC	[M-H]-		Cyclohexaneundecanoic acid	HMDB0030997	C12100	3
Single_Model	325.184	-0.654481	0.510483	-1.28208	0.199814		Anova	model.00	4	40.544	46.649	-16.272	32.544	model.01	5	40.749	48.381	-15.374	30.749	1.7949	1	0.1803	nsig	X325.1841_0.9	nHILIC	[M-H]-		2-Dodecylbenzenesulfonic acid	HMDB0031031	NA	3
Single_Model	309.243	0.748118	0.843605	0.886811	0.375181		Anova	model.00	4	40.544	46.649	-16.272	32.544	model.01	5	41.55	49.182	-15.775	31.55	0.9939	1	0.3188	nsig	X309.2435_11	nRPLC	[M-H]-		(R)-2-Hydroxysterculic acid	HMDB0031060	NA	3
Single_Model	289.18	0.288299	0.301845	0.955122	0.339516		Anova	model.00	4	40.544	46.649	-16.272	32.544	model.01	5	41.534	49.166	-15.767	31.534	1.0094	1	0.3151	nsig	X289.1804_10.4	nRPLC	[M-H]-		(9Z,11E,13E,15Z)-4-Oxo-9,11,13,15-octadecatetraenoic acid	HMDB0031098	NA	3
Single_Model	207.014	0.669109	0.543287	1.23159	0.218101		Anova	model.00	4	40.544	46.649	-16.272	32.544	model.01	5	38.642	46.274	-14.321	28.642	3.9012	1	0.04825	nsig	X207.0145_10.6	nHILIC	[M-H]-		Garcinia acid	HMDB0031159	NA	3
Single_Model	112.076	-0.248086	0.466377	-0.531944	0.594765		Anova	model.00	4	40.544	46.649	-16.272	32.544	model.01	5	42.244	49.876	-16.122	32.244	0.2996	1	0.5841	nsig	X112.0757_1.3	pHILIC	[M+H]+		N-Acetyl-2,3-dihydro-1H-pyrrole	HMDB0031163	NA	3
Single_Model	74.0965	-0.32342	0.350808	-0.92193	0.356565		Anova	model.00	4	40.544	46.649	-16.272	32.544	model.01	5	41.633	49.265	-15.817	31.633	0.9104	1	0.34	nsig	X74.0965_0.9	pHILIC	[M+H]+		1-Butylamine	HMDB0031321	NA	3
Single_Model	98.06	-1.23068	0.879541	-1.39923	0.161744		Anova	model.00	4	40.544	46.649	-16.272	32.544	model.01	5	40.082	47.714	-15.041	30.082	2.4618	1	0.1166	nsig	X98.06_2.3	pHILIC	[M+H]+		1-Cyano-2-hydroxy-3-butene	HMDB0031339	NA	3
Single_Model	261.088	0.0516674	0.204422	0.252748	0.800463		Anova	model.00	4	40.544	46.649	-16.272	32.544	model.01	5	42.479	50.111	-16.24	32.479	0.0645	1	0.7995	nsig	X261.0879_3.5	nRPLC	[M-H]-		L-cis-Cyclo(aspartylphenylalanyl)	HMDB0031360	NA	3
Single_Model	473.343	0.363045	0.899139	0.40377	0.686382		Anova	model.00	4	40.544	46.649	-16.272	32.544	model.01	5	42.379	50.011	-16.19	32.379	0.1645	1	0.6851	nsig	X473.3434_11.1	pRPLC	[M+H]+		Methyl (7Z,9Z,9'Z)-6'-apo-y-caroten-6'-oate	HMDB0031381	NA	3
Single_Model	75.0553	-0.334322	0.317261	-1.05378	0.291985		Anova	model.00	4	40.544	46.649	-16.272	32.544	model.01	5	41.375	49.007	-15.688	31.375	1.1687	1	0.2797	nsig	X75.0553_5.3	pHILIC	[M+H]+		N-Nitrosodimethylamine	HMDB0031419	C14704	3
Single_Model	193.087	-0.113589	0.397994	-0.285404	0.775335		Anova	model.00	4	40.544	46.649	-16.272	32.544	model.01	5	42.462	50.094	-16.231	32.462	0.0818	1	0.7749	nsig	X193.087_2.4	nHILIC	[M-H]-		(R)-3-Hydroxy-5-phenylpentanoic acid	HMDB0031517	NA	3
Single_Model	133.034	-0.201372	0.775753	-0.259582	0.795186		Anova	model.00	4	40.544	46.649	-16.272	32.544	model.01	5	42.48	50.112	-16.24	32.48	0.0639	1	0.8004	nsig	X133.0335_10.6	nHILIC	[M-H]-		Ethyl 2-mercaptopropionate	HMDB0031521	NA	3
Single_Model	95.0855	-0.805995	0.83349	-0.967012	0.333538		Anova	model.00	4	40.544	46.649	-16.272	32.544	model.01	5	41.536	49.168	-15.768	31.536	1.0072	1	0.3156	nsig	X95.0855_0.5	pRPLC	[M+H]+		1-Methyl-1,3-cyclohexadiene	HMDB0031532	NA	3
Single_Model	83.0855	-0.709522	0.609662	-1.16379	0.244507		Anova	model.00	4	40.544	46.649	-16.272	32.544	model.01	5	41.096	48.728	-15.548	31.096	1.4477	1	0.2289	nsig	X83.0855_0.5	pRPLC	[M+H]+		3-Methylcyclopentene	HMDB0031544	NA	3
Single_Model	97.0648	-0.440977	0.442031	-0.997616	0.318466		Anova	model.00	4	40.544	46.649	-16.272	32.544	model.01	5	41.492	49.123	-15.746	31.492	1.0521	1	0.305	nsig	X97.0648_2	pHILIC	[M+H]+		2-Methyl-2-cyclopenten-1-one	HMDB0031545	NA	3
Single_Model	72.0807	0.420127	0.350619	1.19824	0.230822		Anova	model.00	4	40.544	46.649	-16.272	32.544	model.01	5	40.858	48.49	-15.429	30.858	1.6858	1	0.1942	nsig	X72.0807_0.6	pRPLC	[M+H]+		Pyrrolidine	HMDB0031641	NA	3
Single_Model	88.1121	-0.192971	0.315418	-0.611793	0.540675		Anova	model.00	4	40.544	46.649	-16.272	32.544	model.01	5	42.164	49.796	-16.082	32.164	0.3795	1	0.5379	nsig	X88.1121_4.3	pHILIC	[M+H]+		3-Methyl-1-butylamine	HMDB0031659	C02640	3
Single_Model	336.325	0.0310946	0.663793	0.0468439	0.962638		Anova	model.00	4	40.544	46.649	-16.272	32.544	model.01	5	42.541	50.173	-16.271	32.541	0.0022	1	0.9626	nsig	X336.3249_11.3	pRPLC	[M+H]+		Pipericine	HMDB0031678	NA	3
Single_Model	225.076	0.261125	0.561698	0.464885	0.642014		Anova	model.00	4	40.544	46.649	-16.272	32.544	model.01	5	42.34	49.971	-16.17	32.34	0.2041	1	0.6514	nsig	X225.0761_4.9	nRPLC	[M-H]-		3,4,5-Trimethoxyphenyl acetate	HMDB0031722	NA	3
Single_Model	225.15	-0.631268	0.488104	-1.29331	0.195905		Anova	model.00	4	40.544	46.649	-16.272	32.544	model.01	5	40.703	48.335	-15.352	30.703	1.8405	1	0.1749	nsig	X225.1497_1.1	nHILIC	[M-H]-		Methyl dihydrojasmonate	HMDB0031740	NA	3
Single_Model	319.153	-0.879134	0.605419	-1.45211	0.146472		Anova	model.00	4	40.544	46.649	-16.272	32.544	model.01	5	39.206	46.838	-14.603	29.206	3.3375	1	0.06772	nsig	X319.153_7.8	pRPLC	[M+H]+		(S,E)-Zearalenone	HMDB0031752	C09981	3
Single_Model	665.402	0.182792	0.330632	0.552855	0.580363		Anova	model.00	4	40.544	46.649	-16.272	32.544	model.01	5	42.204	49.836	-16.102	32.204	0.3398	1	0.56	nsig	X665.4022_10.2	pRPLC	[M+H]+		3-O-trans-Feruloyleuscaphic acid	HMDB0031837	NA	3
Single_Model	123.092	-0.333167	0.406189	-0.820227	0.412087		Anova	model.00	4	40.544	46.649	-16.272	32.544	model.01	5	41.837	49.469	-15.919	31.837	0.7064	1	0.4007	nsig	X123.0916_3.9	pHILIC	[M+H]+		Trimethylpyrazine	HMDB0031844	NA	3
Single_Model	237.221	-0.966048	1.12027	-0.862334	0.388504		Anova	model.00	4	40.544	46.649	-16.272	32.544	model.01	5	41.74	49.372	-15.87	31.74	0.8039	1	0.3699	nsig	X237.2208_9.9	pRPLC	[M+H]+		3-(5,6,6-Trimethylbicyclo[2.2.1]hept-1-yl)cyclohexanol	HMDB0031851	NA	3
Single_Model	113.024	-2.93659	1.82742	-1.60696	0.108063		Anova	model.00	4	40.544	46.649	-16.272	32.544	model.01	5	39.442	47.074	-14.721	29.442	3.1016	1	0.07822	nsig	X113.0243_0.9	nRPLC	[M-H]-		Norfuraneol	HMDB0031859	NA	3
Single_Model	305.081	-0.131541	0.312428	-0.42103	0.673733		Anova	model.00	4	40.544	46.649	-16.272	32.544	model.01	5	42.365	49.997	-16.183	32.365	0.1784	1	0.6728	nsig	X305.0811_8.7	nHILIC	[M-H]-		gamma-Glutamyl-S-(1-propenyl)cysteine sulfoxide	HMDB0031870	NA	3
Single_Model	261.134	-0.495125	0.599034	-0.826539	0.408498		Anova	model.00	4	40.544	46.649	-16.272	32.544	model.01	5	41.852	49.484	-15.926	31.852	0.6912	1	0.4058	nsig	X261.1341_2.4	nHILIC	[M-H]-		Phaseolic acid	HMDB0031897	NA	3
Single_Model	477.198	0.493127	0.760254	0.648634	0.516575		Anova	model.00	4	40.544	46.649	-16.272	32.544	model.01	5	42.085	49.717	-16.043	32.085	0.4585	1	0.4983	nsig	X477.1979_0.9	nHILIC	[M-H]-		Suspensolide F	HMDB0031918	NA	3
Single_Model	608.151	0.670226	0.855972	0.783	0.433627		Anova	model.00	4	40.544	46.649	-16.272	32.544	model.01	5	41.892	49.524	-15.946	31.892	0.6514	1	0.4196	nsig	X608.1507_10.3	nHILIC	[M-H]-		Malvidin 3-glucoside-4-vinylphenol	HMDB0031968	NA	3
Single_Model	313.179	-0.219536	0.446422	-0.491768	0.622883		Anova	model.00	4	40.544	46.649	-16.272	32.544	model.01	5	42.296	49.928	-16.148	32.296	0.248	1	0.6185	nsig	X313.179_8.3	pRPLC	[M+H]+		Methyl (9Z)-10'-oxo-6,10'-diapo-6-carotenoate	HMDB0031976	NA	3
Single_Model	263.165	-0.358224	0.34383	-1.04186	0.297475		Anova	model.00	4	40.544	46.649	-16.272	32.544	model.01	5	41.281	48.913	-15.641	31.281	1.2625	1	0.2612	nsig	X263.1648_8.7	nRPLC	[M-H]-		12-Oxo-2,3-dinor-10,15-phytodienoic acid	HMDB0032090	NA	3
Single_Model	259.073	-0.954395	0.96281	-0.99126	0.321559		Anova	model.00	4	40.544	46.649	-16.272	32.544	model.01	5	41.491	49.122	-15.745	31.491	1.0531	1	0.3048	nsig	X259.0732_5.6	nRPLC	[M-H]-		1,2,3,4-Tetrahydro-b-carboline-1,3-dicarboxylic acid	HMDB0032102	NA	3
Single_Model	239.071	0.173928	0.336294	0.517189	0.605024		Anova	model.00	4	40.544	46.649	-16.272	32.544	model.01	5	42.271	49.903	-16.136	32.271	0.2722	1	0.6019	nsig	X239.0714_9.6	nHILIC	[M-H]-		2',5'-Dihydroxychalcone	HMDB0032129	NA	3
Single_Model	209.19	-1.13547	0.814774	-1.3936	0.16344		Anova	model.00	4	40.544	46.649	-16.272	32.544	model.01	5	40.364	47.996	-15.182	30.364	2.1798	1	0.1398	nsig	X209.1896_9.7	pRPLC	[M+H]+		2-Decylfuran	HMDB0032215	NA	3
Single_Model	90.0914	-0.524241	0.374476	-1.39993	0.161534		Anova	model.00	4	40.544	46.649	-16.272	32.544	model.01	5	40.366	47.997	-15.183	30.366	2.178	1	0.14	nsig	X90.0914_4.4	pHILIC	[M+H]+		Dimethylethanolamine	HMDB0032231	C04308	3
Single_Model	201.077	-0.178679	0.28234	-0.632853	0.52683		Anova	model.00	4	40.544	46.649	-16.272	32.544	model.01	5	42.139	49.771	-16.07	32.139	0.4046	1	0.5247	nsig	X201.0769_3	nHILIC	[M-H]-		Diethyl oxalpropionate	HMDB0032306	C04067	3
Single_Model	83.014	-0.112417	0.537916	-0.208987	0.834458		Anova	model.00	4	40.544	46.649	-16.272	32.544	model.01	5	42.5	50.132	-16.25	32.5	0.0438	1	0.8342	nsig	X83.014_9.1	nHILIC	[M-H]-		4-Hydroxy-2-butenoic acid gamma-lactone	HMDB0032330	C17601	3
Single_Model	288.253	-0.480483	0.460298	-1.04385	0.296554		Anova	model.00	4	40.544	46.649	-16.272	32.544	model.01	5	41.364	48.996	-15.682	31.364	1.1792	1	0.2775	nsig	X288.253_1.7	pHILIC	[M+H]+		Lauroyl diethanolamide	HMDB0032358	NA	3
Single_Model	326.15	-0.0283473	0.401826	-0.0705462	0.943759		Anova	model.00	4	40.544	46.649	-16.272	32.544	model.01	5	42.539	50.17	-16.269	32.539	0.005	1	0.9437	nsig	X326.1504_7.2	nRPLC	[M-H]-		N1-(2-Methoxy-4-methylbenzyl)-n2-(2-(pyridin-2-yl) ethyl)oxalamide	HMDB0032383	NA	3
Single_Model	421.226	0.0960313	0.593926	0.161689	0.871551		Anova	model.00	4	40.544	46.649	-16.272	32.544	model.01	5	42.518	50.149	-16.259	32.518	0.0261	1	0.8716	nsig	X421.2264_0.9	nHILIC	[M-H]-		2-Methylacetophenone	HMDB0032386	C07874	3
Single_Model	169.067	-0.190301	0.308684	-0.616492	0.53757		Anova	model.00	4	40.544	46.649	-16.272	32.544	model.01	5	42.162	49.794	-16.081	32.162	0.3816	1	0.5367	nsig	X169.0667_2.2	nHILIC	[M-H]-		Methyl beta-naphthyl ketone	HMDB0032412	NA	3
Single_Model	207.059	-0.0993215	0.336745	-0.294946	0.768035		Anova	model.00	4	40.544	46.649	-16.272	32.544	model.01	5	42.456	50.087	-16.228	32.456	0.0881	1	0.7666	nsig	X207.0585_15.3	pHILIC	[M+H]+		2-Methyl-3 or 5 or 6-(furfurylthio)pyrazine (mixture of isomers)	HMDB0032414	NA	3
Single_Model	201.15	-1.19986	0.880828	-1.3622	0.173136		Anova	model.00	4	40.544	46.649	-16.272	32.544	model.01	5	40.249	47.88	-15.124	30.249	2.295	1	0.1298	nsig	X201.1496_1.5	nHILIC	[M-H]-		3-Hydroxynonyl acetate	HMDB0032443	NA	3
Single_Model	243.124	0.119359	0.415391	0.287341	0.773851		Anova	model.00	4	40.544	46.649	-16.272	32.544	model.01	5	42.461	50.093	-16.23	32.461	0.0828	1	0.7735	nsig	X243.1236_1.6	nHILIC	[M-H]-		Polyethylene, oxidized	HMDB0032472	NA	3
Single_Model	341.305	0.410718	0.247589	1.65887	0.0971421		Anova	model.00	4	40.544	46.649	-16.272	32.544	model.01	5	39.22	46.852	-14.61	29.22	3.3232	1	0.06831	nsig	X341.3048_6.6	pHILIC	[M+H]+		Polyoxyethylene (600) monoricinoleate	HMDB0032476	NA	3
Single_Model	227.093	-0.69901	0.613513	-1.13936	0.254555		Anova	model.00	4	40.544	46.649	-16.272	32.544	model.01	5	41.128	48.76	-15.564	31.128	1.4152	1	0.2342	nsig	X227.0925_3.2	nHILIC	[M-H]-		Propyl propane thiosulfonate	HMDB0032496	NA	3
Single_Model	99.0088	-4.82834	4.61099	-1.04714	0.295036		Anova	model.00	4	40.544	46.649	-16.272	32.544	model.01	5	35.837	43.469	-12.918	25.837	6.7067	1	0.009605	nsig	X99.0088_3.3	nHILIC	[M-H]-		Succinic anhydride	HMDB0032523	C19524	3
Single_Model	150.113	-0.520473	0.43829	-1.18751	0.235027		Anova	model.00	4	40.544	46.649	-16.272	32.544	model.01	5	40.952	48.583	-15.476	30.952	1.592	1	0.207	nsig	X150.1125_4.3	pHILIC	[M+H]+	0.735571	2,2',2''-Nitrilotriethanol	HMDB0032538	C06771	2
Single_Model	311.168	-0.65896	0.512233	-1.28645	0.198287		Anova	model.00	4	40.544	46.649	-16.272	32.544	model.01	5	40.743	48.375	-15.371	30.743	1.8009	1	0.1796	nsig	X311.1684_0.9	nHILIC	[M-H]-		N-Undecylbenzenesulfonic acid	HMDB0032549	NA	3
Single_Model	223.076	5.40527	4.46809	1.20975	0.226375		Anova	model.00	4	40.544	46.649	-16.272	32.544	model.01	5	18.52	26.152	-4.26	8.52	24.024	1	9.52e-07	nsig	X223.0757_6.1	nHILIC	[M-H]-		4-Hydroxychalcone	HMDB0032584	C14231	3
Single_Model	263.055	-0.139556	0.644735	-0.216455	0.828633		Anova	model.00	4	40.544	46.649	-16.272	32.544	model.01	5	42.497	50.129	-16.249	32.497	0.0464	1	0.8295	nsig	X263.0553_7.9	pRPLC	[M+H]+		Maclurin	HMDB0032644	C09951	3
Single_Model	425.108	0.453241	0.406059	1.1162	0.264338		Anova	model.00	4	40.544	46.649	-16.272	32.544	model.01	5	41.164	48.796	-15.582	31.164	1.3796	1	0.2402	nsig	X425.108_10.9	pRPLC	[M+H]+		3-Glucosyl-2,3',4,4',6-pentahydroxybenzophenone	HMDB0032645	NA	3
Single_Model	199.134	-0.455555	0.541087	-0.841927	0.399829		Anova	model.00	4	40.544	46.649	-16.272	32.544	model.01	5	41.727	49.358	-15.863	31.727	0.8171	1	0.366	nsig	X199.134_1.1	nHILIC	[M-H]-		C11:1, OH FA (Hydroxy-undecenoic acid)	HMDB0032662	NA	2
Single_Model	320.113	-0.35259	0.410558	-0.858808	0.390446		Anova	model.00	4	40.544	46.649	-16.272	32.544	model.01	5	41.749	49.381	-15.875	31.749	0.7945	1	0.3727	nsig	X320.113_0.8	nRPLC	[M-H]-		Niazirinin	HMDB0032808	NA	3
Single_Model	97.0283	-0.0247034	0.388088	-0.0636541	0.949246		Anova	model.00	4	40.544	46.649	-16.272	32.544	model.01	5	42.54	50.171	-16.27	32.54	0.0041	1	0.9492	nsig	X97.0283_0.5	pRPLC	[M+H]+		2-Furancarboxaldehyde	HMDB0032914	C14279	3
Single_Model	233.107	0.11455	0.279302	0.410131	0.68171		Anova	model.00	4	40.544	46.649	-16.272	32.544	model.01	5	42.371	50.003	-16.186	32.371	0.1726	1	0.6778	nsig	X233.1066_8.8	pHILIC	[M+H]+		2,3-Diphenylpyrazine	HMDB0032981	NA	3
Single_Model	225.055	10.0067	6.29817	1.58882	0.1121		Anova	model.00	4	40.544	46.649	-16.2718	32.544	model.01	5	14.285	21.917	-2.1424	4.285	28.259	1	1.06e-07	nsig	X225.055_7.9	nHILIC	[M-H]-		2-Methoxyxanthone	HMDB0032998	NA	3
Single_Model	443.246	0.725216	0.400395	1.81125	0.0701019		Anova	model.00	4	40.544	46.649	-16.272	32.544	model.01	5	37.792	45.423	-13.896	27.792	4.752	1	0.02926	nsig	X443.2458_10.4	nRPLC	[M-H]-		Antibiotic GR 95647X	HMDB0033034	NA	3
Single_Model	223.065	-0.326493	0.40914	-0.797998	0.424872		Anova	model.00	4	40.544	46.649	-16.272	32.544	model.01	5	41.898	49.53	-15.949	31.898	0.6455	1	0.4217	nsig	X223.0652_4.1	nHILIC	[M-H]-		Propyl 1-(propylthio)propyl disulfide	HMDB0033040	NA	3
Single_Model	211.028	0.0636178	0.384509	0.165452	0.868588		Anova	model.00	4	40.544	46.649	-16.272	32.544	model.01	5	42.516	50.148	-16.258	32.516	0.0279	1	0.8673	nsig	X211.0275_4.3	pRPLC	[M+H]+		1-(Methylsulfinyl)propyl 1-propenyl disulfide	HMDB0033058	NA	3
Single_Model	211.028	-0.60905	0.427435	-1.4249	0.154187		Anova	model.00	4	40.544	46.649	-16.272	32.544	model.01	5	39.88	47.512	-14.94	29.88	2.6638	1	0.1027	nsig	X211.0282_8.7	nHILIC	[M-H]-		1-(Methylsulfinyl)propyl propyl disulfide	HMDB0033061	NA	3
Single_Model	239.06	0.278358	0.693613	0.401316	0.688188		Anova	model.00	4	40.544	46.649	-16.272	32.544	model.01	5	42.385	50.016	-16.192	32.385	0.159	1	0.6901	nsig	X239.0595_10.9	nRPLC	[M-H]-		Propyl 1-(propylsulfinyl)propyl disulfide	HMDB0033071	NA	3
Single_Model	82.0651	-2.38155	1.66386	-1.43135	0.152331		Anova	model.00	4	40.544	46.649	-16.272	32.544	model.01	5	40.008	47.64	-15.004	30.008	2.5356	1	0.1113	nsig	X82.0651_16.3	pHILIC	[M+H]+		1-Methylpyrrole	HMDB0033113	NA	3
Single_Model	144.081	-4.77991	2.44029	-1.95874	0.0501428		Anova	model.00	4	40.544	46.649	-16.272	32.544	model.01	5	34.061	41.692	-12.03	24.061	8.483	1	0.003585	nsig	X144.0806_1.3	pRPLC	[M+H]+		6-Methylquinoline	HMDB0033115	NA	3
Single_Model	133.076	-0.409973	0.378569	-1.08296	0.278828		Anova	model.00	4	40.544	46.649	-16.272	32.544	model.01	5	41.116	48.748	-15.558	31.116	1.4277	1	0.2321	nsig	X133.076_0.9	pHILIC	[M+H]+		1-Methylpyrrolo[1,2-a]pyrazine	HMDB0033171	NA	3
Single_Model	196.089	-0.480817	0.6273	-0.766486	0.443387		Anova	model.00	4	40.544	46.649	-16.272	32.544	model.01	5	41.938	49.57	-15.969	31.938	0.6056	1	0.4364	nsig	X196.0886_5.7	nHILIC	[M-H]-		3-Amino-1-methyl-5H-pyrido[4,3-b]indole	HMDB0033188	C14416	3
Single_Model	367.197	0.541838	0.29099	1.86205	0.0625965		Anova	model.00	4	40.544	46.649	-16.272	32.544	model.01	5	38.213	45.845	-14.107	28.213	4.3302	1	0.03744	nsig	X367.1973_10.6	pHILIC	[M+H]+		(2R,6x)-7-Methyl-3-methylene-1,2,6,7-octanetetrol 2-glucoside	HMDB0033216	NA	3
Single_Model	281.153	-0.121188	0.29338	-0.413076	0.679551		Anova	model.00	4	40.544	46.649	-16.272	32.544	model.01	5	42.377	50.009	-16.188	32.377	0.1669	1	0.6829	nsig	X281.1533_1.4	pHILIC	[M+H]+		7-(4-Hydroxyphenyl)-1-phenyl-4-hepten-3-one	HMDB0033295	NA	3
Single_Model	595.162	0.0499022	0.170286	0.293049	0.769485		Anova	model.00	4	40.544	46.649	-16.272	32.544	model.01	5	42.456	50.087	-16.228	32.456	0.0881	1	0.7666	nsig	X595.1624_10.1	pRPLC	[M+H]+		Kuwanon Z	HMDB0033297	NA	3
Single_Model	371.183	-0.350205	0.511643	-0.684471	0.493678		Anova	model.00	4	40.544	46.649	-16.272	32.544	model.01	5	42.023	49.655	-16.012	32.023	0.5206	1	0.4706	nsig	X371.1835_9	pRPLC	[M+H]+		Licarin C	HMDB0033319	C10650	3
Single_Model	565.409	-0.922763	0.738106	-1.25018	0.211235		Anova	model.00	4	40.544	46.649	-16.272	32.544	model.01	5	39.195	46.827	-14.598	29.195	3.3482	1	0.06728	nsig	X565.4095_6	nHILIC	[M-H]-		Antibiotic X 14889D	HMDB0033334	NA	3
Single_Model	315.184	-0.323492	0.509476	-0.63495	0.525461		Anova	model.00	4	40.544	46.649	-16.272	32.544	model.01	5	42.096	49.728	-16.048	32.096	0.4477	1	0.5034	nsig	X315.1843_17.3	pHILIC	[M+H]+		Lotusine	HMDB0033347	C17567	3
Single_Model	265.048	0.0920958	0.23201	0.396947	0.691406		Anova	model.00	4	40.544	46.649	-16.272	32.544	model.01	5	42.386	50.018	-16.193	32.386	0.1577	1	0.6913	nsig	X265.0479_11.8	nHILIC	[M-H]-		Methoxybrassinin	HMDB0033351	C08506	3
Single_Model	347.146	1.22524	1.07838	1.13618	0.255881		Anova	model.00	4	40.544	46.649	-16.272	32.544	model.01	5	40.973	48.605	-15.487	30.973	1.5704	1	0.2101	nsig	X347.1456_7.8	pRPLC	[M+H]+		Mytilin B	HMDB0033442	NA	3
Single_Model	359.221	-0.257918	0.243788	-1.05796	0.290075		Anova	model.00	4	40.544	46.649	-16.272	32.544	model.01	5	41.396	49.028	-15.698	31.396	1.1479	1	0.284	nsig	X359.2215_1.3	pHILIC	[M+H]+		Sorgoleone 358	HMDB0033443	NA	3
Single_Model	285.173	-0.920615	0.928611	-0.991389	0.321495		Anova	model.00	4	40.544	46.649	-16.272	32.544	model.01	5	41.498	49.13	-15.749	31.498	1.0458	1	0.3065	nsig	X285.1729_9.6	pRPLC	[M+H]+		6,7-Dihydro-4-(hydroxymethyl)-2-(p-hydroxyphenethyl)-7-methyl-5H-2-pyrindinium	HMDB0033483	NA	3
Single_Model	321.13	-0.466078	0.779657	-0.597798	0.549975		Anova	model.00	4	40.544	46.649	-16.272	32.544	model.01	5	42.185	49.816	-16.092	32.185	0.359	1	0.5491	nsig	X321.1299_5.3	pRPLC	[M+H]+		Isomugineic acid	HMDB0033555	NA	3
Single_Model	235.027	0.527699	0.27649	1.90856	0.0563188		Anova	model.00	4	40.544	46.649	-16.272	32.544	model.01	5	39.628	47.26	-14.814	29.628	2.9155	1	0.08773	nsig	X235.0271_4.3	pRPLC	[M+H]+		Ajoene	HMDB0033566	C16757	3
Single_Model	200.95	-0.935335	0.537347	-1.74065	0.0817443		Anova	model.00	4	40.544	46.649	-16.272	32.544	model.01	5	37.724	45.356	-13.862	27.724	4.8192	1	0.02814	nsig	X200.95_11.6	nHILIC	[M-H]-		Acesulfame K	HMDB0033585	NA	3
Single_Model	399.111	-0.208343	0.275591	-0.755986	0.449657		Anova	model.00	4	40.544	46.649	-16.272	32.544	model.01	5	41.939	49.571	-15.97	31.939	0.6044	1	0.4369	nsig	X399.1111_6.5	pHILIC	[M+H]+		Zearalenone 4-sulfate	HMDB0033623	NA	3
Single_Model	307.067	-0.223549	0.321509	-0.695311	0.48686		Anova	model.00	4	40.544	46.649	-16.272	32.544	model.01	5	42.071	49.703	-16.036	32.071	0.4723	1	0.4919	nsig	X307.0669_8.7	nHILIC	[M-H]-		D-Erythroascorbic acid 1'-a-D-glucoside	HMDB0033627	NA	3
Single_Model	323.186	0.285298	0.548712	0.519942	0.603104		Anova	model.00	4	40.544	46.649	-16.272	32.544	model.01	5	42.268	49.9	-16.134	32.268	0.2756	1	0.5996	nsig	X323.1864_8.5	nRPLC	[M-H]-		Lactapiperanol D	HMDB0033631	NA	3
Single_Model	271.116	0.528784	0.791169	0.668358	0.503905		Anova	model.00	4	40.544	46.649	-16.272	32.544	model.01	5	42.077	49.709	-16.039	32.077	0.4665	1	0.4946	nsig	X271.1164_5.3	nRPLC	[M-H]-		Decarbamoylneosaxitoxin	HMDB0033663	NA	3
Single_Model	531.406	-0.180061	0.313373	-0.574591	0.565568		Anova	model.00	4	40.544	46.649	-16.272	32.544	model.01	5	42.195	49.827	-16.098	32.195	0.3484	1	0.555	nsig	X531.406_3.5	pHILIC	[M+H]+		alpha-Tocopherol succinate	HMDB0033685	NA	3
Single_Model	529.282	-0.622683	0.923363	-0.674365	0.50008		Anova	model.00	4	40.544	46.649	-16.272	32.544	model.01	5	42.082	49.714	-16.041	32.082	0.4618	1	0.4968	nsig	X529.2817_10	pRPLC	[M+H]+		Physapubenolide	HMDB0033976	NA	3
Single_Model	267.103	-0.549452	0.502119	-1.09427	0.273838		Anova	model.00	4	40.544	46.649	-16.272	32.544	model.01	5	41.185	48.817	-15.593	31.185	1.3583	1	0.2438	nsig	X267.1026_4.5	pRPLC	[M+H]+		7-Methoxy-2-methylisoflavone	HMDB0033980	NA	3
Single_Model	93.0697	0.062314	1.14924	0.0542219	0.956758		Anova	model.00	4	40.544	46.649	-16.272	32.544	model.01	5	42.541	50.173	-16.27	32.541	0.0029	1	0.9568	nsig	X93.0697_0.9	pRPLC	[M+H]+		Toluene	HMDB0034168	C01455	3
Single_Model	81.0447	-0.81099	0.640012	-1.26715	0.205102		Anova	model.00	4	40.544	46.649	-16.272	32.544	model.01	5	40.441	48.072	-15.22	30.441	2.1031	1	0.147	nsig	X81.0447_1.7	pHILIC	[M+H]+	0.716771	Pyrazine	HMDB0034176	C02018	2
Single_Model	211.144	-0.456498	0.45746	-0.997899	0.318329		Anova	model.00	4	40.544	46.649	-16.272	32.544	model.01	5	41.485	49.116	-15.742	31.485	1.059	1	0.3034	nsig	X211.1441_5.5	pHILIC	[M+H]+		L,L-Cyclo(leucylprolyl)	HMDB0034276	NA	3
Single_Model	86.0964	-0.0725404	0.907968	-0.0798931	0.936322		Anova	model.00	4	40.544	46.649	-16.272	32.544	model.01	5	42.537	50.169	-16.269	32.537	0.0064	1	0.9362	nsig	X86.0964_6.7	pHILIC	[M+H]+	0.749564	Piperidine	HMDB0034301	C01746	2
Single_Model	162.058	0.0446351	0.169065	0.264011	0.791772		Anova	model.00	4	40.544	46.649	-16.272	32.544	model.01	5	42.474	50.106	-16.237	32.474	0.0699	1	0.7915	nsig	X162.058_0.8	pRPLC	[M+H]+	0.671647	S-Allylcysteine	HMDB0034323	C16759	1
Single_Model	235.061	-0.9176	0.858013	-1.06945	0.284868		Anova	model.00	4	40.544	46.649	-16.272	32.544	model.01	5	41.314	48.946	-15.657	31.314	1.2296	1	0.2675	nsig	X235.0612_4.9	pRPLC	[M+H]+		7-Acetoxy-6-methoxycoumarin	HMDB0034345	NA	3
Single_Model	304.061	0.156264	0.327338	0.477379	0.633092		Anova	model.00	4	40.544	46.649	-16.272	32.544	model.01	5	42.289	49.921	-16.144	32.289	0.2548	1	0.6137	nsig	X304.0606_12.6	nHILIC	[M-H]-		Cepharadione A	HMDB0034364	NA	3
Single_Model	459.2	0.444829	0.402319	1.10566	0.268873		Anova	model.00	4	40.544	46.649	-16.272	32.544	model.01	5	41.248	48.879	-15.624	31.248	1.2961	1	0.2549	nsig	X459.1996_12.2	pRPLC	[M+H]+		Austinol	HMDB0034464	NA	3
Single_Model	263.236	-0.571354	1.12867	-0.506219	0.612703		Anova	model.00	4	40.544	46.649	-16.272	32.544	model.01	5	42.285	49.917	-16.142	32.285	0.259	1	0.6108	nsig	X263.2362_11.1	pRPLC	[M+H]+		6,10,14-Trimethyl-5,9,13-pentadecatrien-2-one	HMDB0034495	NA	3
Single_Model	289.187	0.0330085	0.794599	0.041541	0.966865		Anova	model.00	4	40.544	46.649	-16.272	32.544	model.01	5	42.542	50.174	-16.271	32.542	0.0017	1	0.9669	nsig	X289.1868_13.6	pHILIC	[M+H]+		Sakacin A	HMDB0034554	NA	3
Single_Model	379.223	-0.731818	0.56376	-1.2981	0.194252		Anova	model.00	4	40.544	46.649	-16.272	32.544	model.01	5	40.522	48.154	-15.261	30.522	2.0213	1	0.1551	nsig	X379.2232_10.7	pRPLC	[M+H]+	0.747734	Neotame	HMDB0034566	NA	2
Single_Model	583.163	-0.0165402	0.432946	-0.0382038	0.969525		Anova	model.00	4	40.544	46.649	-16.272	32.544	model.01	5	42.542	50.174	-16.271	32.542	0.0014	1	0.9697	nsig	X583.163_10.3	pRPLC	[M+H]+		Norrubrofusarin 6-beta-gentiobioside	HMDB0034570	NA	3
Single_Model	329.197	-0.22836	0.306071	-0.746101	0.455607		Anova	model.00	4	40.544	46.649	-16.272	32.544	model.01	5	41.965	49.597	-15.982	31.965	0.5789	1	0.4467	nsig	X329.1971_12.4	pHILIC	[M+H]+		8-O-Methyloblongine	HMDB0034579	NA	3
Single_Model	401.051	0.292051	0.413682	0.70598	0.480201		Anova	model.00	4	40.544	46.649	-16.272	32.544	model.01	5	41.892	49.524	-15.946	31.892	0.6513	1	0.4196	nsig	X401.0513_4	nHILIC	[M-H]-		Shoyuflavone B	HMDB0034589	NA	3
Single_Model	361.149	-0.363338	0.434433	-0.83635	0.402958		Anova	model.00	4	40.544	46.649	-16.272	32.544	model.01	5	41.782	49.413	-15.891	31.782	0.762	1	0.3827	nsig	X361.149_5.2	pRPLC	[M+H]+		1-(3,4-Dimethoxyphenyl)-1,2-ethanediol 1-O-b-D-glucoside	HMDB0034626	NA	3
Single_Model	393.227	0.22456	0.244337	0.919058	0.358065		Anova	model.00	4	40.544	46.649	-16.272	32.544	model.01	5	41.588	49.219	-15.794	31.588	0.956	1	0.3282	nsig	X393.2267_1.4	pHILIC	[M+H]+		Dihydrofukinolide	HMDB0034662	NA	3
Single_Model	591.115	-0.904785	0.661888	-1.36697	0.171633		Anova	model.00	4	40.544	46.649	-16.272	32.544	model.01	5	39.524	47.156	-14.762	29.524	3.0199	1	0.08225	nsig	X591.1146_4.5	nRPLC	[M-H]-		Protoleucomelone	HMDB0034711	NA	3
Single_Model	367.139	0.41167	0.261025	1.57713	0.114766		Anova	model.00	4	40.544	46.649	-16.272	32.544	model.01	5	38.553	46.185	-14.277	28.553	3.9907	1	0.04575	nsig	X367.1391_15	pHILIC	[M+H]+		7-beta-D-Glucopyranosyloxybutylidenephthalide	HMDB0034752	NA	3
Single_Model	289.118	-0.29879	0.258193	-1.15724	0.247176		Anova	model.00	4	40.544	46.649	-16.272	32.544	model.01	5	41.022	48.654	-15.511	31.022	1.5213	1	0.2174	nsig	X289.118_1.2	pHILIC	[M+H]+		3-Carboxy-2,3,4,9-tetrahydro-1H-pyrido[3,4-b]indole-1-propanoic acid	HMDB0034881	NA	3
Single_Model	483.151	-0.936257	0.603156	-1.55226	0.120599		Anova	model.00	4	40.544	46.649	-16.272	32.544	model.01	5	39.613	47.245	-14.806	29.613	2.9306	1	0.08692	nsig	X483.1515_5.5	nHILIC	[M-H]-		7-Methyl-1,4,5-naphthalenetriol 4-[xylosyl-(1->6)-glucoside]	HMDB0034909	NA	3
Single_Model	217.061	0.135304	0.492739	0.274596	0.783627		Anova	model.00	4	40.544	46.649	-16.272	32.544	model.01	5	42.465	50.097	-16.233	32.465	0.0783	1	0.7796	nsig	X217.0611_5.2	nRPLC	[M-H]-		(S)-3-[(Cyanophenylmethyl)amino]-3-oxopropanoic acid	HMDB0034911	NA	3
Single_Model	385.274	-0.13289	0.193953	-0.685167	0.493239		Anova	model.00	4	40.544	46.649	-16.272	32.544	model.01	5	42.055	49.687	-16.028	32.055	0.4884	1	0.4846	nsig	X385.2735_1.1	pHILIC	[M+H]+		Persicaxanthin	HMDB0034952	NA	3
Single_Model	349.166	0.156912	0.717012	0.218842	0.826773		Anova	model.00	4	40.544	46.649	-16.272	32.544	model.01	5	42.495	50.127	-16.248	32.495	0.0483	1	0.8261	nsig	X349.1655_7.9	pRPLC	[M+H]+		Gibberellin A60	HMDB0034988	NA	3
Single_Model	217.108	-0.317505	0.777363	-0.408438	0.682952		Anova	model.00	4	40.544	46.649	-16.272	32.544	model.01	5	42.374	50.006	-16.187	32.374	0.1698	1	0.6803	nsig	X217.1076_5.4	nRPLC	[M-H]-		C10:0,OH DC FA (Hydroxysebacic acid)	HMDB00350	NA	2
Single_Model	201.127	-0.403104	0.636743	-0.633072	0.526687		Anova	model.00	4	40.544	46.649	-16.272	32.544	model.01	5	42.138	49.77	-16.069	32.138	0.4058	1	0.5241	nsig	X201.127_9.4	pRPLC	[M+H]+		2-(2-Methylpropoxy)naphthalene	HMDB0035076	NA	3
Single_Model	431.294	0.214464	0.272069	0.788269	0.430539		Anova	model.00	4	40.544	46.649	-16.272	32.544	model.01	5	41.884	49.516	-15.942	31.884	0.6596	1	0.4167	nsig	X431.2937_1.3	nHILIC	[M-H]-		beta-Citraurin	HMDB0035091	NA	3
Single_Model	200.091	-0.232963	0.354925	-0.656373	0.511584		Anova	model.00	4	40.544	46.649	-16.272	32.544	model.01	5	42.109	49.74	-16.054	32.109	0.435	1	0.5096	nsig	X200.0915_0.8	pRPLC	[M+H]+		2-Acetyl-1,5,6,7-tetrahydro-6-hydroxy-7-(hydroxymethyl)-4H-azepine-4-one	HMDB0035177	NA	3
Single_Model	215.028	0.520822	0.696628	0.747633	0.454682		Anova	model.00	4	40.544	46.649	-16.272	32.544	model.01	5	41.869	49.501	-15.934	31.869	0.6746	1	0.4115	nsig	X215.0279_9.6	nHILIC	[M-H]-		Chlorohydrin	HMDB0035190	NA	3
Single_Model	639.249	0.0485396	0.352036	0.137882	0.890333		Anova	model.00	4	40.544	46.649	-16.272	32.544	model.01	5	42.525	50.156	-16.262	32.525	0.0191	1	0.8902	nsig	X639.2492_6.4	pRPLC	[M+H]+		Kanokoside C	HMDB0035305	NA	3
Single_Model	273.257	-0.209084	0.274079	-0.762863	0.445545		Anova	model.00	4	40.544	46.649	-16.272	32.544	model.01	5	41.897	49.529	-15.949	31.897	0.6462	1	0.4215	nsig	X273.257_11.6	pRPLC	[M+H]+		ent-16-Kaurene	HMDB0035394	NA	3
Single_Model	379.249	-0.226889	0.230996	-0.982219	0.325992		Anova	model.00	4	40.544	46.649	-16.272	32.544	model.01	5	41.651	49.282	-15.825	31.651	0.8931	1	0.3446	nsig	X379.2486_2	pHILIC	[M+H]+		Annoglabasin F	HMDB0035508	NA	3
Single_Model	293.058	0.0347295	0.672212	0.0516645	0.958796		Anova	model.00	4	40.544	46.649	-16.272	32.544	model.01	5	42.541	50.173	-16.27	32.541	0.0027	1	0.9588	nsig	X293.0581_6.1	pRPLC	[M+H]+		Chlorosesamone	HMDB0035529	NA	3
Single_Model	221.155	-0.373709	0.495301	-0.754508	0.450544		Anova	model.00	4	40.544	46.649	-16.272	32.544	model.01	5	41.954	49.586	-15.977	31.954	0.5894	1	0.4427	nsig	X221.1547_1.1	nHILIC	[M-H]-		Rishitin	HMDB0035593	C09715	3
Single_Model	103.04	-1.25915	0.799318	-1.57528	0.115191		Anova	model.00	4	40.544	46.649	-16.272	32.544	model.01	5	39.811	47.442	-14.905	29.811	2.7331	1	0.09829	nsig	X103.0401_6.2	nHILIC	[M-H]-		C4:1 FA (Hydroxybutyric acid)	HMDB00357	C01089	2
Single_Model	435.2	-0.803998	0.875912	-0.917899	0.358672		Anova	model.00	4	40.544	46.649	-16.272	32.544	model.01	5	41.606	49.238	-15.803	31.606	0.9378	1	0.3328	nsig	X435.2005_10.9	pRPLC	[M+H]+		Melledonol	HMDB0035884	NA	3
Single_Model	473.254	-0.398128	0.314408	-1.26628	0.205414		Anova	model.00	4	40.544	46.649	-16.272	32.544	model.01	5	40.61	48.242	-15.305	30.61	1.9332	1	0.1644	nsig	X473.2542_13.2	pRPLC	[M+H]+		Lucidenic acid K	HMDB0035890	NA	3
Single_Model	232.083	0.294096	0.435552	0.675226	0.499532		Anova	model.00	4	40.544	46.649	-16.272	32.544	model.01	5	42.064	49.696	-16.032	32.064	0.4796	1	0.4886	nsig	X232.0826_8.6	nHILIC	[M-H]-		Hirsutin	HMDB0035923	NA	3
Single_Model	571.289	0.614565	0.405798	1.51446	0.129909		Anova	model.00	4	40.544	46.649	-16.272	32.544	model.01	5	39.597	47.229	-14.799	29.597	2.9463	1	0.08607	nsig	X571.2894_6.7	nHILIC	[M-H]-		Ganoderic acid H	HMDB0035987	NA	3
Single_Model	229.181	-0.741239	0.590182	-1.25595	0.209134		Anova	model.00	4	40.544	46.649	-16.272	32.544	model.01	5	40.827	48.459	-15.414	30.827	1.7165	1	0.1901	nsig	X229.1809_8.9	nRPLC	[M-H]-		3-[[5-Methyl-2-(1-methylethyl)cyclohexyl]oxy]-1,2-propanediol	HMDB0036133	NA	3
Single_Model	297.134	-1.28134	0.931001	-1.3763	0.168729		Anova	model.00	4	40.544	46.649	-16.272	32.544	model.01	5	40.282	47.914	-15.141	30.282	2.2618	1	0.1326	nsig	X297.1339_5.3	nRPLC	[M-H]-		Toxin T2 tetrol	HMDB0036159	NA	3
Single_Model	253.035	-0.184582	0.896257	-0.205947	0.836832		Anova	model.00	4	40.544	46.649	-16.272	32.544	model.01	5	42.501	50.133	-16.251	32.501	0.0423	1	0.837	nsig	X253.0352_8.8	nHILIC	[M-H]-		Bis(2,5-dimethyl-3-furanyl) disulfide	HMDB0036167	NA	3
Single_Model	491.266	-0.455658	0.382418	-1.19152	0.23345		Anova	model.00	4	40.544	46.649	-16.272	32.544	model.01	5	40.87	48.501	-15.435	30.87	1.674	1	0.1957	nsig	X491.2661_11.5	nRPLC	[M-H]-		Erinacine P	HMDB0036313	NA	3
Single_Model	617.204	0.768177	0.708332	1.08449	0.278149		Anova	model.00	4	40.544	46.649	-16.272	32.544	model.01	5	40.771	48.403	-15.386	30.771	1.7726	1	0.1831	nsig	X617.2036_10.4	pRPLC	[M+H]+		trans-delta-Viniferin 3''-glucoside	HMDB0036366	NA	3
Single_Model	206.102	0.516531	0.545291	0.947257	0.343508		Anova	model.00	4	40.544	46.649	-16.272	32.544	model.01	5	41.577	49.208	-15.788	31.577	0.967	1	0.3254	nsig	X206.1022_9.1	pHILIC	[M+H]+		N-Methylcalystegine C1	HMDB0036394	NA	3
Single_Model	401.216	1.13186	0.632664	1.78903	0.0736095		Anova	model.00	4	40.544	46.649	-16.272	32.544	model.01	5	38.619	46.251	-14.309	28.619	3.9246	1	0.04758	nsig	X401.2156_14.7	pHILIC	[M+H]+		Cincassiol B	HMDB0036855	NA	3
Single_Model	407.135	-0.485592	0.533123	-0.910844	0.362378		Anova	model.00	4	40.544	46.649	-16.272	32.544	model.01	5	41.677	49.309	-15.839	31.677	0.8662	1	0.352	nsig	X407.1347_4.7	nRPLC	[M-H]-		Ginkgolide A	HMDB0036862	C07601	3
Single_Model	595.38	0.584911	0.636087	0.919546	0.35781		Anova	model.00	4	40.544	46.649	-16.272	32.544	model.01	5	41.657	49.289	-15.829	31.657	0.8865	1	0.3464	nsig	X595.3805_10.9	pRPLC	[M+H]+		7,8-Dehydroastaxanthianthin	HMDB0036872	NA	3
Single_Model	489.339	0.523888	0.496531	1.0551	0.291381		Anova	model.00	4	40.544	46.649	-16.272	32.544	model.01	5	41.291	48.923	-15.646	31.291	1.2525	1	0.2631	nsig	X489.3387_10.5	pRPLC	[M+H]+		7',8'-Dihydro-8'-hydroxycitraniaxanthin	HMDB0036884	NA	3
Single_Model	193.068	0.183416	0.225156	0.814619	0.415291		Anova	model.00	4	40.544	46.649	-16.272	32.544	model.01	5	41.846	49.477	-15.923	31.846	0.6981	1	0.4034	nsig	X193.0677_1.5	pRPLC	[M+H]+		2-(Methylthiomethyl)-3-phenyl-2-propenal	HMDB0037166	NA	3
Single_Model	224.056	-0.547746	0.362054	-1.51288	0.130309		Anova	model.00	4	40.544	46.649	-16.272	32.544	model.01	5	39.855	47.486	-14.927	29.855	2.6891	1	0.101	nsig	X224.0564_8.5	nHILIC	[M-H]-		2-Hydroxy-4,7-dimethoxy-2H-1,4-benzoxazin-3(4H)-one	HMDB0037264	NA	3
Single_Model	549.087	0.628618	0.607227	1.03523	0.300563		Anova	model.00	4	40.544	46.649	-16.272	32.544	model.01	5	41.07	48.702	-15.535	31.07	1.4733	1	0.2248	nsig	X549.0872_8.5	nHILIC	[M-H]-		Quercetin 3-(6''-malonyl-glucoside)	HMDB0037368	C12638	3
Single_Model	240.051	-0.0442266	0.342852	-0.128996	0.897361		Anova	model.00	4	40.544	46.649	-16.272	32.544	model.01	5	42.527	50.159	-16.264	32.527	0.0166	1	0.8975	nsig	X240.0507_0.6	nRPLC	[M-H]-		2,4-Dihydroxy-6,7-dimethoxy-2H-1,4-benzoxazin-3(4H)-one	HMDB0037548	NA	3
Single_Model	603.243	-0.572928	0.355194	-1.613	0.106745		Anova	model.00	4	40.544	46.649	-16.272	32.544	model.01	5	37.725	45.357	-13.863	27.725	4.8182	1	0.02816	nsig	X603.2434_12.5	nRPLC	[M-H]-		6-Hydroxysandoricin	HMDB0037556	NA	3
Single_Model	287.223	0.271099	0.450287	0.602057	0.547136		Anova	model.00	4	40.544	46.649	-16.272	32.544	model.01	5	42.178	49.81	-16.089	32.178	0.3659	1	0.5452	nsig	X287.2225_9.5	nRPLC	[M-H]-		(S)-10,16-Dihydroxyhexadecanoic acid	HMDB0037798	C08285	3
Single_Model	246.17	-3.10514	1.86789	-1.66237	0.0964382		Anova	model.00	4	40.544	46.649	-16.272	32.544	model.01	5	34.412	42.044	-12.206	24.412	8.1313	1	0.004351	nsig	X246.1699_6.4	pHILIC	[M+H]+		isovalerylcarnitine	HMDB00688	NA	2
Single_Model	299.82	-0.031977	0.157606	-0.202892	0.839219		Anova	model.00	4	40.544	46.649	-16.272	32.544	model.01	5	42.503	50.135	-16.251	32.503	0.0409	1	0.8398	nsig	X299.8195_7.5	nHILIC	[M-H]-		Ficin	HMDB0037833	NA	3
Single_Model	615.194	0.101086	0.137094	0.73735	0.46091		Anova	model.00	4	40.544	46.649	-16.272	32.544	model.01	5	41.963	49.595	-15.982	31.963	0.5803	1	0.4462	nsig	X615.1936_9.6	pRPLC	[M+H]+		Catechin 3',4'-diglucoside	HMDB0037950	NA	3
Single_Model	316.285	-0.253656	0.375674	-0.675201	0.499548		Anova	model.00	4	40.544	46.649	-16.272	32.544	model.01	5	42.085	49.717	-16.043	32.085	0.4584	1	0.4984	nsig	X316.2849_4.3	pHILIC	[M+H]+		Dehydrophytosphingosine	HMDB0038057	NA	3
Single_Model	580.179	0.229792	0.318197	0.722168	0.470191		Anova	model.00	4	40.544	46.649	-16.272	32.544	model.01	5	41.958	49.59	-15.979	31.958	0.5852	1	0.4443	nsig	X580.1794_10.3	pRPLC	[M+H]+		Pelargonidin 3-rhamnoside 5-glucoside	HMDB0038086	NA	3
Single_Model	295.155	-1.24511	1.08575	-1.14678	0.251474		Anova	model.00	4	40.544	46.649	-16.272	32.544	model.01	5	40.683	48.315	-15.342	30.683	1.8602	1	0.1726	nsig	X295.1549_8.2	nRPLC	[M-H]-		Ovalicin	HMDB0038120	C09674	3
Single_Model	167.089	-0.161059	0.595353	-0.270526	0.786756		Anova	model.00	4	40.544	46.649	-16.272	32.544	model.01	5	42.471	50.103	-16.235	32.471	0.0729	1	0.7871	nsig	X167.0893_0.9	pRPLC	[M+H]+		3-(4-Methyl-3-pentenyl)thiophene	HMDB0038183	NA	3
Single_Model	335.212	0.284455	0.757352	0.375591	0.707221		Anova	model.00	4	40.544	46.649	-16.272	32.544	model.01	5	42.4	50.032	-16.2	32.4	0.1434	1	0.7049	nsig	X335.2122_8.7	pRPLC	[M+H]+		Carnocin U I49	HMDB0038223	NA	3
Single_Model	255.121	-0.658551	0.359053	-1.83413	0.0666346		Anova	model.00	4	40.544	46.649	-16.272	32.544	model.01	5	37.355	44.987	-13.678	27.355	5.1886	1	0.02274	nsig	X255.1213_7	nRPLC	[M-H]-		Decarbamoylsaxitoxin	HMDB0038319	NA	3
Single_Model	218.067	0.0319122	0.789848	0.040403	0.967772		Anova	model.00	4	40.544	46.649	-16.272	32.544	model.01	5	42.542	50.174	-16.271	32.542	0.0016	1	0.9678	nsig	X218.0669_10.4	nHILIC	[M-H]-		1-Isothiocyanato-7-(methylsulfinyl)heptane	HMDB0038441	NA	3
Single_Model	389.303	-0.570553	0.806152	-0.707749	0.479101		Anova	model.00	4	40.544	46.649	-16.272	32.544	model.01	5	42.004	49.636	-16.002	32.004	0.5393	1	0.4627	nsig	X389.3031_11.1	pRPLC	[M+H]+		Methyl 2-(10-heptadecenyl)-6-hydroxybenzoate	HMDB0038523	NA	3
Single_Model	279.173	-0.506759	0.348884	-1.45251	0.146359		Anova	model.00	4	40.544	46.649	-16.272	32.544	model.01	5	39.938	47.569	-14.969	29.938	2.6061	1	0.1065	nsig	X279.1733_4.9	pRPLC	[M+H]+		Longistylin C	HMDB0038544	NA	3
Single_Model	295.114	0.127047	0.690731	0.183931	0.854067		Anova	model.00	4	40.544	46.649	-16.272	32.544	model.01	5	42.51	50.142	-16.255	32.51	0.0338	1	0.8542	nsig	X295.114_6.1	pRPLC	[M+H]+		Distichonic acid A	HMDB0038752	NA	3
Single_Model	207.088	-0.0146612	0.165972	-0.0883355	0.92961		Anova	model.00	4	40.544	46.649	-16.272	32.544	model.01	5	42.536	50.168	-16.268	32.536	0.0078	1	0.9297	nsig	X207.0877_1.2	pHILIC	[M+H]+		2,4,6-Triethyl-1,3,5-oxadithiane	HMDB0038791	NA	3
Single_Model	483.116	0.336239	0.736487	0.456544	0.647999		Anova	model.00	4	40.544	46.649	-16.272	32.544	model.01	5	42.341	49.973	-16.171	32.341	0.2027	1	0.6526	nsig	X483.116_2.1	nHILIC	[M-H]-		Diospyrin	HMDB0038867	NA	3
Single_Model	304.151	0.0447917	0.434557	0.103074	0.917904		Anova	model.00	4	40.544	46.649	-16.272	32.544	model.01	5	42.533	50.165	-16.266	32.533	0.0108	1	0.9172	nsig	X304.1512_7.6	nHILIC	[M-H]-		Syndesine	HMDB0039161	NA	3
Single_Model	453.198	1.67409	0.990363	1.69038	0.090955		Anova	model.00	4	40.544	46.649	-16.272	32.544	model.01	5	39.494	47.125	-14.747	29.494	3.0501	1	0.08073	nsig	X453.198_1	nHILIC	[M-H]-		Butyl (S)-3-hydroxybutyrate [arabinosyl-(1->6)-glucoside]	HMDB0039214	NA	3
Single_Model	439.089	-0.261088	0.405699	-0.643551	0.519867		Anova	model.00	4	40.544	46.649	-16.272	32.544	model.01	5	42.124	49.756	-16.062	32.124	0.4194	1	0.5172	nsig	X439.0894_2.7	nHILIC	[M-H]-		3,5-Dihydroxyphenyl 1-O-(6-O-galloyl-beta-D-glucopyranoside)	HMDB0039307	NA	3
Single_Model	819.511	-0.126924	0.392546	-0.323337	0.74644		Anova	model.00	4	40.544	46.649	-16.272	32.544	model.01	5	42.46	50.091	-16.23	32.46	0.0841	1	0.7718	nsig	X819.5107_5.5	pHILIC	[M+H]+		Quinquenoside F1	HMDB0039398	NA	3
Single_Model	302.135	0.32014	0.381797	0.838507	0.401746		Anova	model.00	4	40.544	46.649	-16.272	32.544	model.01	5	41.771	49.403	-15.886	31.771	0.7727	1	0.3794	nsig	X302.1355_7	nHILIC	[M-H]-		N5-Acetyl-N2-gamma-L-glutamyl-L-ornithine	HMDB0039423	NA	3
Single_Model	355.262	-0.102022	0.469169	-0.217453	0.827855		Anova	model.00	4	40.544	46.649	-16.272	32.544	model.01	5	42.496	50.127	-16.248	32.496	0.0481	1	0.8264	nsig	X355.2616_9.7	pRPLC	[M+H]+		1,1'-[1,12-Dodecanediylbis(oxy)]bisbenzene	HMDB0039760	NA	3
Single_Model	592.07	0.293461	0.256126	1.14577	0.251892		Anova	model.00	4	40.544	46.649	-16.272	32.544	model.01	5	41.07	48.702	-15.535	31.07	1.4732	1	0.2248	nsig	X592.0701_1.2	nRPLC	[M-H]-		Cyanidin 3-(6''-dioxalylglucoside)	HMDB0039936	NA	3
Single_Model	393.14	-0.0912899	0.26873	-0.339708	0.734077		Anova	model.00	4	40.544	46.649	-16.272	32.544	model.01	5	42.425	50.057	-16.213	32.425	0.1185	1	0.7307	nsig	X393.1404_4.1	nRPLC	[M-H]-		1-(3-Methyl-2-butenoyl)-6-apiosylglucose	HMDB0039952	NA	3
Single_Model	443.333	-0.379268	0.694434	-0.546154	0.58496		Anova	model.00	4	40.544	46.649	-16.272	32.544	model.01	5	42.244	49.876	-16.122	32.244	0.2998	1	0.584	nsig	X443.3328_11	pRPLC	[M+H]+		(all-E)-6'-Apo-y-caroten-6'-al	HMDB0040118	NA	3
Single_Model	197.043	-0.814146	0.538567	-1.51169	0.130613		Anova	model.00	4	40.544	46.649	-16.272	32.544	model.01	5	39.565	47.197	-14.783	29.565	2.9785	1	0.08438	nsig	X197.0431_1	nRPLC	[M-H]-		4-Methyldibenzothiophene	HMDB0040164	NA	3
Single_Model	515.412	-0.331459	0.84546	-0.392045	0.695025		Anova	model.00	4	40.544	46.649	-16.272	32.544	model.01	5	42.378	50.009	-16.189	32.378	0.166	1	0.6837	nsig	X515.4118_11.4	pRPLC	[M+H]+		Didodecyl thiobispropanoate	HMDB0040172	NA	3
Single_Model	371.314	-0.172126	0.465627	-0.369665	0.711632		Anova	model.00	4	40.544	46.649	-16.272	32.544	model.01	5	42.406	50.038	-16.203	32.406	0.1379	1	0.7104	nsig	X371.3141_10.6	pRPLC	[M+H]+		Diethylhexyl adipate	HMDB0040270	C14240	3
Single_Model	497.2	-0.490256	0.500446	-0.979638	0.327265		Anova	model.00	4	40.544	46.649	-16.272	32.544	model.01	5	41.529	49.16	-15.764	31.529	1.0151	1	0.3137	nsig	X497.2003_8.8	pRPLC	[M+H]+		(7R*,8R*)-3-Methoxy-3',4,7,9,9'-pentahydroxy-8,4'-oxyneolignan 4-xyloside	HMDB0040325	NA	3
Single_Model	419.192	-0.510207	0.7492	-0.681002	0.49587		Anova	model.00	4	40.544	46.649	-16.272	32.544	model.01	5	42.018	49.65	-16.009	32.018	0.5256	1	0.4685	nsig	X419.1925_10.8	pRPLC	[M+H]+		2-[4-(3-Hydroxypropyl)-2-methoxyphenoxy]-1,3-propanediol 1-glucoside	HMDB0040353	NA	3
Single_Model	309.077	-0.982743	0.504797	-1.94681	0.0515576		Anova	model.00	4	40.544	46.649	-16.272	32.544	model.01	5	37.471	45.103	-13.736	27.471	5.0724	1	0.02431	nsig	X309.0771_5.1	nRPLC	[M-H]-		6,11-Dihydroxy-2,2-dimethylpyrano[3,2-c]xanthen-7(2H)-one	HMDB0040357	NA	3
Single_Model	666.268	-0.36519	0.270964	-1.34775	0.17774		Anova	model.00	4	40.544	46.649	-16.272	32.544	model.01	5	40.476	48.108	-15.238	30.476	2.0679	1	0.1504	nsig	X666.2681_0.9	nHILIC	[M-H]-		Neoacrimarine B	HMDB0040385	NA	3
Single_Model	196.976	0.0102711	0.269692	0.0380846	0.96962		Anova	model.00	4	40.544	46.649	-16.272	32.544	model.01	5	42.542	50.174	-16.271	32.542	0.0014	1	0.9697	nsig	X196.9761_12	nHILIC	[M-H]-		(±)-Sulfobutanedioic acid	HMDB0040585	NA	3
Single_Model	266.113	0.365346	0.34971	1.04471	0.296156		Anova	model.00	4	40.544	46.649	-16.272	32.544	model.01	5	41.38	49.012	-15.69	31.38	1.1639	1	0.2807	nsig	X266.1134_7.8	pHILIC	[M+H]+		Agaritinal	HMDB0040694	NA	3
Single_Model	225.113	-0.30787	0.45988	-0.669457	0.503204		Anova	model.00	4	40.544	46.649	-16.272	32.544	model.01	5	42.085	49.716	-16.042	32.085	0.459	1	0.4981	nsig	X225.1133_1.9	nHILIC	[M-H]-		Allixin	HMDB0040705	NA	3
Single_Model	289.05	0.280764	0.28606	0.981487	0.326353		Anova	model.00	4	40.544	46.649	-16.272	32.544	model.01	5	41.512	49.144	-15.756	31.512	1.0313	1	0.3098	nsig	X289.0497_8.8	nHILIC	[M-H]-		2-(4-Hydroxyphenyl)naphthalic anhydride	HMDB0041121	NA	3
Single_Model	281.041	0.0650918	0.277074	0.234926	0.814266		Anova	model.00	4	40.544	46.649	-16.272	32.544	model.01	5	42.488	50.12	-16.244	32.488	0.0553	1	0.8141	nsig	X281.0411_6.7	nRPLC	[M-H]-		N-Methoxyspirobrassinol	HMDB0041133	NA	3
Single_Model	265.128	0.133453	0.593456	0.224875	0.822077		Anova	model.00	4	40.544	46.649	-16.272	32.544	model.01	5	42.491	50.123	-16.246	32.491	0.0522	1	0.8193	nsig	X265.1277_10.4	pRPLC	[M+H]+		Ilicifolinoside A	HMDB0041186	NA	3
Single_Model	683.179	-0.211968	0.23283	-0.910401	0.362611		Anova	model.00	4	40.544	46.649	-16.272	32.544	model.01	5	41.829	49.461	-15.915	31.829	0.7145	1	0.3979	nsig	X683.1794_6.6	pHILIC	[M+H]+		8-Hydroxyhesperetin 7-[6-acetylglucosyl-(1->2)-glucoside]	HMDB0041232	NA	3
Single_Model	245.139	-0.370287	0.518551	-0.71408	0.475178		Anova	model.00	4	40.544	46.649	-16.272	32.544	model.01	5	42.009	49.641	-16.005	32.009	0.5342	1	0.4648	nsig	X245.1392_6.7	nRPLC	[M-H]-		C12:0,OH DC FA (Hydroxydodecanedioic acid)	HMDB00413	NA	2
Single_Model	229.108	-1.07297	1.06877	-1.00392	0.315415		Anova	model.00	4	40.544	46.649	-16.272	32.544	model.01	5	41.428	49.06	-15.714	31.428	1.1153	1	0.2909	nsig	X229.1079_5.4	nRPLC	[M-H]-		Dicyclohexyl disulfide	HMDB0041448	NA	3
Single_Model	319.096	0.0396893	0.337206	0.117701	0.906305		Anova	model.00	4	40.544	46.649	-16.272	32.544	model.01	5	42.529	50.161	-16.265	32.529	0.0142	1	0.9052	nsig	X319.0965_8.8	nHILIC	[M-H]-		2,3-Dihydro-2,3-dihydroxy-4-(4-methoxyphenyl)-1H-phenalen-1-one	HMDB0041463	NA	3
Single_Model	304.097	0.628358	0.417642	1.50454	0.132443		Anova	model.00	4	40.544	46.649	-16.272	32.544	model.01	5	39.698	47.33	-14.849	29.698	2.8459	1	0.09161	nsig	X304.0971_6.9	nHILIC	[M-H]-		N-Acetyldehydroanonaine	HMDB0041537	NA	3
Single_Model	449.071	-0.235271	0.39008	-0.603137	0.546418		Anova	model.00	4	40.544	46.649	-16.272	32.544	model.01	5	42.144	49.776	-16.072	32.144	0.3996	1	0.5273	nsig	X449.0709_5.8	nRPLC	[M-H]-		Myricetin 3-arabinoside	HMDB0041635	NA	3
Single_Model	260.089	-0.0119476	0.148671	-0.0803631	0.935948		Anova	model.00	4	40.544	46.649	-16.272	32.544	model.01	5	42.537	50.169	-16.269	32.537	0.0065	1	0.9358	nsig	X260.0886_4.9	pRPLC	[M+H]+		Mizoribine	HMDB0041934	NA	3
Single_Model	230.186	0.800105	0.541403	1.47784	0.139452		Anova	model.00	4	40.544	46.649	-16.272	32.544	model.01	5	39.738	47.37	-14.869	29.738	2.8057	1	0.09393	nsig	X230.1862_7	pHILIC	[M+H]+		N1,N8-Diacetylspermidine	HMDB0041947	NA	3
Single_Model	145.05	0.499123	0.960774	0.519501	0.603412		Anova	model.00	4	40.544	46.649	-16.272	32.544	model.01	5	42.269	49.901	-16.135	32.269	0.2745	1	0.6004	nsig	X145.0504_1.9	nRPLC	[M-H]-		C6:0,DC FA (Adipic acid)	HMDB00448	NA	2
Single_Model	137.024	-0.918828	0.694645	-1.32273	0.185925		Anova	model.00	4	40.544	46.649	-16.272	32.544	model.01	5	40.547	48.179	-15.273	30.547	1.9968	1	0.1576	nsig	X137.0244_1.5	nHILIC	[M-H]-		Hydroxy-benzoic acid	HMDB00500	C00156	1
Single_Model	115.076	0.223995	0.860724	0.260241	0.794678		Anova	model.00	4	40.544	46.649	-16.272	32.544	model.01	5	42.476	50.107	-16.238	32.476	0.068	1	0.7942	nsig	X115.0764_5.7	nRPLC	[M-H]-		Caproic acid	HMDB00535	C01585|	2
Single_Model	223.17	0.898397	0.581454	1.54509	0.122325		Anova	model.00	4	40.544	46.649	-16.272	32.544	model.01	5	38.047	45.679	-14.024	28.047	4.4962	1	0.03397	nsig	X223.17_10.2	nRPLC	[M-H]-		C14:2 FA (Tetradecadienoic acid)	HMDB00560	NA	2
Single_Model	280.075	-0.36278	0.491317	-0.738384	0.460281		Anova	model.00	4	40.544	46.649	-16.272	32.544	model.01	5	41.983	49.615	-15.992	31.983	0.5606	1	0.454	nsig	X280.0753_9.2	nHILIC	[M-H]-		albendazole S-oxide	HMDB0059609	C02809	3
Single_Model	437.087	-0.036042	0.371251	-0.0970825	0.922661		Anova	model.00	4	40.544	46.649	-16.272	32.544	model.01	5	42.534	50.166	-16.267	32.534	0.0094	1	0.9227	nsig	X437.0866_5.2	nRPLC	[M-H]-		Riboflavin cyclic-4',5'-phosphate	HMDB0059614	C16071	3
Single_Model	430.827	-0.164521	0.254875	-0.645495	0.518606		Anova	model.00	4	40.544	46.649	-16.272	32.544	model.01	5	42.114	49.746	-16.057	32.114	0.4293	1	0.5124	nsig	X430.8267_12.5	nHILIC	[M-H]-		3-(3,5-Diiodo-4-hydroxyphenyl)pyruvate	HMDB0059637	C01244	3
Single_Model	211.098	-1.13509	0.68213	-1.66403	0.0961061		Anova	model.00	4	40.544	46.649	-16.272	32.544	model.01	5	39.094	46.725	-14.547	29.094	3.4501	1	0.06325	nsig	X211.0976_1.8	nHILIC	[M-H]-		3,4-Methyleneazelaic acid	HMDB0059744	NA	3
Single_Model	204.98	-0.580226	0.423197	-1.37105	0.170358		Anova	model.00	4	40.544	46.649	-16.272	32.544	model.01	5	39.799	47.431	-14.899	29.799	2.7448	1	0.09757	nsig	X204.9802_0.6	nRPLC	[M-H]-		5-Sulfoxymethylfurfural	HMDB0059752	NA	3
Single_Model	193.066	-0.162822	0.353288	-0.460875	0.644888		Anova	model.00	4	40.544	46.649	-16.272	32.544	model.01	5	42.326	49.958	-16.163	32.326	0.2177	1	0.6408	nsig	X193.0665_4.5	nRPLC	[M-H]-		1-Hydroxyphenanthrene	HMDB0059797	C11432	3
Single_Model	233.03	0.310429	0.347591	0.893086	0.371811		Anova	model.00	4	40.544	46.649	-16.272	32.544	model.01	5	41.701	49.333	-15.85	31.701	0.8428	1	0.3586	nsig	X233.03_4.6	nHILIC	[M-H]-		Acetyl citrate	HMDB0059808	NA	3
Single_Model	119.086	-0.798922	0.674035	-1.18528	0.235905		Anova	model.00	4	40.544	46.649	-16.272	32.544	model.01	5	40.976	48.608	-15.488	30.976	1.5675	1	0.2106	nsig	X119.0856_0.9	pHILIC	[M+H]+		Indane	HMDB0059837	NA	3
Single_Model	230.013	-1.94314	1.41319	-1.375	0.169132		Anova	model.00	4	40.544	46.649	-16.272	32.544	model.01	5	39.21	46.842	-14.605	29.21	3.3336	1	0.06788	nsig	X230.0128_2.8	nHILIC	[M-H]-	0.835192	Paracetamol sulfate	HMDB0059911	NA	1
Single_Model	813.136	-0.373714	0.487023	-0.767344	0.442877		Anova	model.00	4	40.544	46.649	-16.272	32.544	model.01	5	41.922	49.554	-15.961	31.922	0.6217	1	0.4304	nsig	X813.1359_4.8	nRPLC	[M-H]-		Luteolin 7-O-[beta-D-glucuronosyl-(1->2)-beta-D-glucuronide]-4'-O-beta-D-glucuronide	HMDB0060296	C04900	3
Single_Model	199.097	-0.945529	0.889946	-1.06246	0.288029		Anova	model.00	4	40.544	46.649	-16.272	32.544	model.01	5	41.285	48.917	-15.643	31.285	1.2587	1	0.2619	nsig	X199.0973_6.4	nRPLC	[M-H]-		C10:1,DC FA (Decenedicarboxylic acid)	HMDB00603	NA	2
Single_Model	213.16	-0.328129	0.428588	-0.765605	0.443911		Anova	model.00	4	40.544	46.649	-16.272	32.544	model.01	5	41.972	49.604	-15.986	31.972	0.5715	1	0.4497	nsig	X213.1596_2.2	pHILIC	[M+H]+		1,4'-Bipiperidine-1'-carboxylic acid	HMDB0060336	C16836	3
Single_Model	208.073	0.295047	0.403162	0.731832	0.464271		Anova	model.00	4	40.544	46.649	-16.272	32.544	model.01	5	41.982	49.614	-15.991	31.982	0.5615	1	0.4537	nsig	X208.0727_8.1	nHILIC	[M-H]-		4-Acetamido-2-amino-6-nitrotoluene	HMDB0060384	C16420	3
Single_Model	145.097	-0.196452	0.286382	-0.685978	0.492727		Anova	model.00	4	40.544	46.649	-16.272	32.544	model.01	5	42.071	49.703	-16.036	32.071	0.4723	1	0.492	nsig	X145.0971_1.4	pHILIC	[M+H]+		4-Amino-1-piperidinecarboxylic acid	HMDB0060385	C16837	3
Single_Model	207.149	-2.73092	1.41854	-1.92516	0.0542096		Anova	model.00	4	40.544	46.649	-16.2718	32.544	model.01	5	24.922	32.554	-7.4611	14.922	17.621	1	2.695e-05	nsig	X207.1491_1.5	pHILIC	[M+H]+	0.726386	Norlidocaine	HMDB0060432	C16551	2
Single_Model	297.138	-0.0963451	0.41514	-0.232078	0.816477		Anova	model.00	4	40.544	46.649	-16.272	32.544	model.01	5	42.49	50.122	-16.245	32.49	0.0537	1	0.8168	nsig	X297.1384_5.2	pRPLC	[M+H]+		Didemethylcitalopram	HMDB0060472	C16609	3
Single_Model	200.103	0.0236292	0.338432	0.0698197	0.944337		Anova	model.00	4	40.544	46.649	-16.272	32.544	model.01	5	42.539	50.171	-16.269	32.539	0.0049	1	0.9442	nsig	X200.1027_9	pHILIC	[M+H]+		gamma-Glutamyl-beta-aminopropiononitrile	HMDB0060477	C06114	3
Single_Model	335.116	0.260128	0.309418	0.840702	0.400515		Anova	model.00	4	40.544	46.649	-16.272	32.544	model.01	5	41.801	49.433	-15.901	31.801	0.7422	1	0.389	nsig	X335.1158_8	pHILIC	[M+H]+		Glutathione episulfonium ion	HMDB0060479	C14874	3
Single_Model	202.051	-0.235325	0.291331	-0.807757	0.419231		Anova	model.00	4	40.544	46.649	-16.272	32.544	model.01	5	41.818	49.449	-15.909	31.818	0.7261	1	0.3942	nsig	X202.0508_5.8	nRPLC	[M-H]-		Indolepyruvate	HMDB0060484	C00331	3
Single_Model	298.086	-0.354214	0.636826	-0.556218	0.578062		Anova	model.00	4	40.544	46.649	-16.272	32.544	model.01	5	42.223	49.855	-16.112	32.223	0.3203	1	0.5714	nsig	X298.0862_3.5	pRPLC	[M+H]+		Albendazole sulfone	HMDB0060561	C16626	3
Single_Model	335.075	-0.131508	0.314433	-0.418239	0.675772		Anova	model.00	4	40.544	46.649	-16.272	32.544	model.01	5	42.364	49.996	-16.182	32.364	0.1793	1	0.672	nsig	X335.0747_10.1	nHILIC	[M-H]-		Captopril-cysteine disulfide	HMDB0060562	NA	3
Single_Model	269.092	-0.382074	0.311327	-1.22724	0.219731		Anova	model.00	4	40.544	46.649	-16.272	32.544	model.01	5	40.633	48.265	-15.317	30.633	1.9104	1	0.1669	nsig	X269.0923_6.1	nRPLC	[M-H]-		10,11-Dihydroxycarbamazepine	HMDB0060568	C07495	3
Single_Model	341.208	0.375245	0.25958	1.44559	0.148293		Anova	model.00	4	40.544	46.649	-16.272	32.544	model.01	5	40.249	47.881	-15.124	30.249	2.2949	1	0.1298	nsig	X341.2081_10.6	pRPLC	[M+H]+		Perindoprilat	HMDB0060574	NA	3
Single_Model	283.155	0.434883	0.421326	1.03218	0.30199		Anova	model.00	4	40.544	46.649	-16.272	32.544	model.01	5	41.409	49.041	-15.704	31.409	1.1349	1	0.2867	nsig	X283.1549_2	nHILIC	[M-H]-		Alpha-dihydroartemisinin	HMDB0060593	NA	3
Single_Model	221.103	0.0612537	0.286068	0.214123	0.830451		Anova	model.00	4	40.544	46.649	-16.272	32.544	model.01	5	42.497	50.129	-16.248	32.497	0.0469	1	0.8286	nsig	X221.1032_12.2	pHILIC	[M+H]+		2,4-Diamino-6,7-dimethoxyquinazoline	HMDB0060724	NA	3
Single_Model	338.059	-0.383535	0.3684	-1.04108	0.297837		Anova	model.00	4	40.544	46.649	-16.272	32.544	model.01	5	41.387	49.018	-15.693	31.387	1.157	1	0.2821	nsig	X338.0586_4.8	pHILIC	[M+H]+		5-Carboxy-lumiracoxib	HMDB0060775	NA	3
Single_Model	297.159	-0.000412343	0.157822	-0.00261271	0.997915		Anova	model.00	4	40.544	46.649	-16.272	32.544	model.01	5	42.544	50.175	-16.272	32.544	0	1	0.9979	nsig	X297.1591_8.8	pHILIC	[M+H]+		6-allyl-8b-Carboxy-ergoline	HMDB0060782	NA	3
Single_Model	537.146	0.304227	0.334031	0.910776	0.362413		Anova	model.00	4	40.544	46.649	-16.272	32.544	model.01	5	41.536	49.167	-15.768	31.536	1.008	1	0.3154	nsig	X537.1459_6	pHILIC	[M+H]+		6-beta-Hydroxy-mometasone furoate	HMDB0060783	NA	3
Single_Model	216.171	0.11491	0.208599	0.550863	0.581727		Anova	model.00	4	40.544	46.649	-16.272	32.544	model.01	5	42.236	49.868	-16.118	32.236	0.3076	1	0.5792	nsig	X216.1705_6.6	pHILIC	[M+H]+		Diethylcarbamazine N-oxide	HMDB0060817	NA	3
Single_Model	427.137	-0.172461	0.260766	-0.661364	0.508379		Anova	model.00	4	40.544	46.649	-16.272	32.544	model.01	5	42.063	49.695	-16.032	32.063	0.4804	1	0.4882	nsig	X427.1375_5.2	nRPLC	[M-H]-		Lacosamide-glucuronide	HMDB0060829	NA	3
Single_Model	331.129	-0.377837	0.311968	-1.21114	0.225843		Anova	model.00	4	40.544	46.649	-16.272	32.544	model.01	5	40.967	48.599	-15.483	30.967	1.5767	1	0.2092	nsig	X331.1291_6.6	nRPLC	[M-H]-		meta-O-Dealkylated flecainide	HMDB0060831	NA	3
Single_Model	345.08	-0.0512781	0.358282	-0.143122	0.886194		Anova	model.00	4	40.544	46.649	-16.272	32.544	model.01	5	42.523	50.155	-16.262	32.523	0.0204	1	0.8865	nsig	X345.0799_6.9	nHILIC	[M-H]-		N1-(2-Hydroxyethyl)flurazepam	HMDB0060853	NA	3
Single_Model	368.077	-0.0612517	0.240463	-0.254724	0.798936		Anova	model.00	4	40.544	46.649	-16.272	32.544	model.01	5	42.478	50.11	-16.239	32.478	0.0659	1	0.7973	nsig	X368.0766_0.6	nRPLC	[M-H]-		6-Hydroxy-R-acenocoumarol	HMDB0060882	NA	3
Single_Model	353.16	-0.312109	0.297473	-1.0492	0.294085		Anova	model.00	4	40.544	46.649	-16.272	32.544	model.01	5	41.29	48.922	-15.645	31.29	1.2537	1	0.2628	nsig	X353.16_7.8	nRPLC	[M-H]-	0.824598	Propofol .beta.-D-glucuronide	HMDB0060933	NA	2
Single_Model	322.087	0.148308	0.275468	0.538386	0.59031		Anova	model.00	4	40.544	46.649	-16.272	32.544	model.01	5	42.25	49.882	-16.125	32.25	0.2934	1	0.588	nsig	X322.0872_1.6	nRPLC	[M-H]-		desmethyladinazolam	HMDB0060969	NA	3
Single_Model	372.104	0.485711	0.266624	1.82171	0.0684989		Anova	model.00	4	40.544	46.649	-16.272	32.544	model.01	5	37.395	45.027	-13.697	27.395	5.1486	1	0.02326	nsig	X372.1039_0.6	nRPLC	[M-H]-		para-hydroxyrosiglitazone	HMDB0060981	NA	3
Single_Model	352.072	0.11486	0.381557	0.30103	0.763391		Anova	model.00	4	40.544	46.649	-16.272	32.544	model.01	5	42.454	50.086	-16.227	32.454	0.0893	1	0.7651	nsig	X352.072_5.9	nHILIC	[M-H]-		lansoprazole sulfide	HMDB0061003	NA	3
Single_Model	172.991	-2.1828	1.80381	-1.21011	0.226237		Anova	model.00	4	40.544	46.649	-16.272	32.544	model.01	5	35.609	43.241	-12.805	25.609	6.9344	1	0.008455	nsig	X172.9909_2.6	nRPLC	[M-H]-		Phenol sulphate	HMDB0061112	NA	2
Single_Model	272.14	-0.455538	0.333446	-1.36615	0.171892		Anova	model.00	4	40.544	46.649	-16.272	32.544	model.01	5	40.446	48.078	-15.223	30.446	2.0975	1	0.1475	nsig	X272.1397_3.5	nRPLC	[M-H]-		N-Acetyl desmethyl frovatriptan	HMDB0061158	NA	3
Single_Model	273.084	-0.107307	0.262813	-0.408302	0.683052		Anova	model.00	4	40.544	46.649	-16.272	32.544	model.01	5	42.38	50.012	-16.19	32.38	0.1636	1	0.6859	nsig	X273.0837_4.9	pRPLC	[M+H]+		Pyridine N-oxide glucuronide	HMDB0061177	NA	3
Single_Model	262.165	-0.882062	0.683045	-1.29137	0.196576		Anova	model.00	4	40.544	46.649	-16.272	32.544	model.01	5	40.479	48.111	-15.24	30.479	2.0644	1	0.1508	nsig	X262.1647_8.1	pHILIC	[M+H]+	0.787654	C5:0, OH AC (Hydroxyisovaleroylcarnitine)	HMDB0061189	NA	2
Single_Model	135.03	-0.368927	0.495494	-0.744564	0.456535		Anova	model.00	4	40.544	46.649	-16.272	32.544	model.01	5	41.998	49.63	-15.999	31.998	0.5456	1	0.4601	nsig	X135.0299_9.6	nHILIC	[M-H]-	0.80736	Erythronic acid|Threonic acid	HMDB00943	C01620	2
Single_Model	677.587	-0.190193	0.208913	-0.910391	0.362616		Anova	model.00	4	40.544	46.649	-16.272	32.544	model.01	5	41.683	49.315	-15.842	31.683	0.8602	1	0.3537	nsig	X677.587_10.2	pRPLC	[M+H]+		CE(MonoMe(11,3))	HMDB0061672	NA	3
Single_Model	522.283	0.1866	0.49118	0.379901	0.704019		Anova	model.00	4	40.544	46.649	-16.272	32.544	model.01	5	42.397	50.029	-16.199	32.397	0.1463	1	0.7021	nsig	X522.2825_13.3	nRPLC	[M-H]-		LPS(18:1)	HMDB0061694	NA	3
Single_Model	526.312	-0.654457	0.628627	-1.04109	0.297833		Anova	model.00	4	40.544	46.649	-16.272	32.544	model.01	5	41.377	49.009	-15.689	31.377	1.1665	1	0.2801	nsig	X526.3118_10.7	pRPLC	[M+H]+		LPS(18:0)	HMDB0061698	NA	3
Single_Model	187.071	0.554392	0.6262	0.885329	0.375979		Anova	model.00	4	40.544	46.649	-16.272	32.544	model.01	5	41.223	48.854	-15.611	31.223	1.321	1	0.2504	nsig	X187.0713_11.2	pHILIC	[M+H]+	0.817196	Pyroglutamylglycine	HMDB0061890	NA	2
Single_Model	220.065	0.109239	0.233216	0.468403	0.639497		Anova	model.00	4	40.544	46.649	-16.272	32.544	model.01	5	42.318	49.95	-16.159	32.318	0.2259	1	0.6346	nsig	X220.0647_5	nHILIC	[M-H]-		N-lactoyl-Methionine	HMDB0062182	NA	3
Single_Model	483.25	-1.01686	1.00008	-1.01678	0.309257		Anova	model.00	4	40.544	46.649	-16.272	32.544	model.01	5	40.681	48.312	-15.34	30.681	1.8631	1	0.1723	nsig	X483.2504_8.3	pRPLC	[M+H]+		1-(4Z,7Z,10Z,13Z,16Z,19Z-docosahexaenoyl)-glycero-3-phosphate	HMDB0062307	NA	3
Single_Model	467.314	-0.519792	0.663737	-0.783129	0.433551		Anova	model.00	4	40.544	46.649	-16.272	32.544	model.01	5	41.893	49.525	-15.947	31.893	0.6503	1	0.42	nsig	X467.3144_11.6	pRPLC	[M+H]+		1-eicosanoyl-glycero-3-phosphate	HMDB0062315	NA	3
Single_Model	423.252	-0.0707621	0.323825	-0.21852	0.827024		Anova	model.00	4	40.544	46.649	-16.272	32.544	model.01	5	42.495	50.127	-16.248	32.495	0.0485	1	0.8258	nsig	X423.2516_2	nHILIC	[M-H]-		1-heptadecanoyl-glycero-3-phosphate	HMDB0062318	NA	3
Single_Model	381.204	-0.366804	0.9608	-0.381769	0.702633		Anova	model.00	4	40.544	46.649	-16.272	32.544	model.01	5	42.392	50.024	-16.196	32.392	0.1515	1	0.6971	nsig	X381.2042_10.8	nRPLC	[M-H]-		1-tetradecanoyl-sn-glycero-3-phosphate	HMDB0062321	NA	3
Single_Model	451.283	-0.0028254	0.160776	-0.0175735	0.985979		Anova	model.00	4	40.544	46.649	-16.272	32.544	model.01	5	42.543	50.175	-16.272	32.543	0.0003	1	0.986	nsig	X451.2829_1.9	nHILIC	[M-H]-		1-nonadecanoyl-glycero-3-phosphate	HMDB0062322	NA	3
Single_Model	397.27	-0.073074	0.565345	-0.129256	0.897155		Anova	model.00	4	40.544	46.649	-16.272	32.544	model.01	5	42.527	50.158	-16.263	32.527	0.017	1	0.8963	nsig	X397.2702_10.4	pRPLC	[M+H]+		1-hexadecyl-glycero-3-phosphate	HMDB0062325	NA	3
Single_Model	448.342	-0.210364	0.164319	-1.28022	0.200469		Anova	model.00	4	40.544	46.649	-16.272	32.544	model.01	5	40.622	48.253	-15.311	30.622	1.9221	1	0.1656	nsig	X448.3417_4.3	pHILIC	[M+H]+		N-Stearoyl tyrosine	HMDB0062343	NA	3
Single_Model	386.325	0.27032	0.219695	1.23044	0.218534		Anova	model.00	4	40.544	46.649	-16.272	32.544	model.01	5	40.877	48.509	-15.439	30.877	1.6664	1	0.1967	nsig	X386.3249_9.8	pRPLC	[M+H]+		Pentadecanoylcarnitine	HMDB0062517	NA	3
Single_Model	383.153	-0.102239	0.169637	-0.60269	0.546715		Anova	model.00	4	40.544	46.649	-16.272	32.544	model.01	5	42.177	49.809	-16.088	32.177	0.3668	1	0.5447	nsig	X383.1533_8.2	nRPLC	[M-H]-	0.756811	16a-hydroxy DHEA 3-sulfate	HMDB0062544	NA	1
Single_Model	260.023	-1.5583	1.46276	-1.06532	0.286732		Anova	model.00	4	40.544	46.649	-16.272	32.544	model.01	5	39.237	46.869	-14.618	29.237	3.3067	1	0.069	nsig	X260.0231_2.9	nHILIC	[M-H]-		2-Methoxyacetaminophen sulfate	HMDB0062550	NA	3
Single_Model	160.061	0.628147	0.859874	0.73051	0.465078		Anova	model.00	4	40.544	46.649	-16.272	32.544	model.01	5	41.985	49.617	-15.992	31.985	0.5587	1	0.4548	nsig	X160.0615_7.1	nHILIC	[M-H]-	0.836683	N-acetylthreonine	HMDB0062557	NA	1
Single_Model	441.249	-0.444071	0.350622	-1.26652	0.205325		Anova	model.00	4	40.544	46.649	-16.272	32.544	model.01	5	40.772	48.403	-15.386	30.772	1.772	1	0.1831	nsig	X441.2491_1.6	nHILIC	[M-H]-		Prostaglandin G2 2-glyceryl Ester	HMDB0062591	NA	3
Single_Model	280.263	-0.233349	0.241477	-0.966341	0.333874		Anova	model.00	4	40.544	46.649	-16.272	32.544	model.01	5	41.463	49.095	-15.732	31.463	1.0807	1	0.2986	nsig	X280.2632_2.7	pHILIC	[M+H]+		Linoleamide	HMDB0062656	NA	3
Single_Model	308.091	-0.185831	0.470072	-0.395324	0.692604		Anova	model.00	4	40.544	46.649	-16.272	32.544	model.01	5	42.387	50.019	-16.194	32.387	0.1562	1	0.6926	nsig	X308.0909_11.2	pHILIC	[M+H]+		Glutathione	HMDB0062697	C00051	1
Single_Model	202.072	0.0852147	0.462855	0.184107	0.85393		Anova	model.00	4	40.544	46.649	-16.272	32.544	model.01	5	42.51	50.142	-16.255	32.51	0.0335	1	0.8548	nsig	X202.0717_0.6	nRPLC	[M-H]-		N-acetyl-L-2-aminoadipate(2-)	HMDB0062715	NA	3
Single_Model	385.153	-0.720525	0.749112	-0.961838	0.336131		Anova	model.00	4	40.544	46.649	-16.272	32.544	model.01	5	41.484	49.116	-15.742	31.484	1.0598	1	0.3033	nsig	X385.1531_10.8	pRPLC	[M+H]+		Dodecamethylpentasiloxane	HMDB0062731	NA	3
Single_Model	199.007	-0.548821	0.455463	-1.20498	0.228213		Anova	model.00	4	40.544	46.649	-16.272	32.544	model.01	5	40.623	48.255	-15.312	30.623	1.9205	1	0.1658	nsig	X199.0071_1.5	nHILIC	[M-H]-		4-Vinylphenol sulfate	HMDB0062775	NA	3
Single_Model	199.17	-0.298845	0.497012	-0.601284	0.547651		Anova	model.00	4	40.544	46.649	-16.272	32.544	model.01	5	42.18	49.812	-16.09	32.18	0.3635	1	0.5466	nsig	X199.1698_8.5	nRPLC	[M-H]-		C12:0 FA (Dodecanoic acid)	HMDB00638	C02679	2
Single_Model	104.071	-1.36988	0.939474	-1.45813	0.144804		Anova	model.00	4	40.544	46.649	-16.272	32.544	model.01	5	39.537	47.168	-14.768	29.537	3.0071	1	0.0829	nsig	X104.0706_8.3	pHILIC	[M+H]+		Aminobutyrate|Aminoisobutyrate|Dimethylglycine(2)	HMDB03911	C05145	2
Single_Model	101.061	0.248421	0.695947	0.356954	0.721126		Anova	model.00	4	40.544	46.649	-16.272	32.544	model.01	5	42.416	50.048	-16.208	32.416	0.1278	1	0.7208	nsig	X101.0607_4	nRPLC	[M-H]-		C5:0 FA (Isovaleric acid|Valeric acid)	HMDB00718|HMDB00892	C08262|C00803	2
Single_Model	288.216	-0.424234	0.254503	-1.66691	0.095533		Anova	model.00	4	40.544	46.649	-16.272	32.544	model.01	5	39.328	46.96	-14.664	29.328	3.2155	1	0.07294	nsig	X288.2159_5.6	pRPLC	[M+H]+	0.780959	C8:0 AC (L-Octanoylcarnitine)	HMDB00791	C02838	1
Single_Model	201.113	-2.22809	1.26279	-1.76441	0.0776625		Anova	model.00	4	40.544	46.649	-16.272	32.544	model.01	5	37.851	45.483	-13.925	27.851	4.6929	1	0.03029	nsig	X201.1131_7	nRPLC	[M-H]-	0.832378	C10:0,DC FA (Sebacic acid)	HMDB00792	C08277	2
Single_Model	227.201	0.174164	0.618526	0.28158	0.778266		Anova	model.00	4	40.544	46.649	-16.272	32.544	model.01	5	42.464	50.096	-16.232	32.464	0.0799	1	0.7775	nsig	X227.2011_9.4	nRPLC	[M-H]-		C14:0 FA (Myristic acid)	HMDB00806	C06424	1
Single_Model	146.081	-0.108581	0.390398	-0.27813	0.780913		Anova	model.00	4	40.544	46.649	-16.272	32.544	model.01	5	42.467	50.099	-16.233	32.467	0.0766	1	0.7819	nsig	X146.0811_7.8	pHILIC	[M+H]+	0.832634	Butyrylglycine|Isobutyrylglycine	HMDB00808	NA	1
Single_Model	218.139	-0.278046	0.235723	-1.17955	0.238181		Anova	model.00	4	40.544	46.649	-16.272	32.544	model.01	5	40.896	48.528	-15.448	30.896	1.6479	1	0.1992	nsig	X218.1386_7.4	pHILIC	[M+H]+	0.832633	C3:0 AC (Propionylcarnitine)	HMDB00824	C03017	2
Single_Model	283.264	-1.51788	0.918022	-1.65342	0.0982455		Anova	model.00	4	40.544	46.649	-16.272	32.544	model.01	5	39.001	46.633	-14.501	29.001	3.5425	1	0.05982	nsig	X283.264_0.9	nHILIC	[M-H]-		C18:0 FA (Stearic acid)	HMDB00827	C01530	2
Single_Model	257.078	2.71407	1.50409	1.80445	0.0711601		Anova	model.00	4	40.544	46.649	-16.272	32.544	model.01	5	31.24	38.872	-10.62	21.24	11.304	1	0.0007735	nsig	X257.0778_2.8	nHILIC	[M-H]-		5-methyluridine (ribothymidine)	HMDB00884	NA	1
Single_Model	215.128	-0.195796	0.37749	-0.518679	0.603985		Anova	model.00	4	40.544	46.649	-16.272	32.544	model.01	5	42.274	49.906	-16.137	32.274	0.2698	1	0.6035	nsig	X215.1284_7.1	nRPLC	[M-H]-	0.764218	C11:0,DC FA (Undecanedioic acid)	HMDB00888	NA	2
Single_Model	227.129	-1.47625	1.27887	-1.15434	0.248363		Anova	model.00	4	40.544	46.649	-16.272	32.544	model.01	5	41.057	48.689	-15.528	31.057	1.4867	1	0.2227	nsig	X227.1286_7.7	nRPLC	[M-H]-	0.744688	C12:1,DC FA (Traumatic acid)	HMDB00933	C16308	2
Single_Model	358.27	-0.190023	0.253971	-0.748206	0.454336		Anova	model.00	4	40.544	46.649	-16.272	32.544	model.01	5	41.946	49.578	-15.973	31.946	0.5972	1	0.4397	nsig	X358.2698_8.7	pHILIC	[M+H]+		Leu-Leu-Leu	HMDB0094648	NA	3
Single_Model	197.101	0.0470683	0.541293	0.0869553	0.930707		Anova	model.00	4	40.544	46.649	-16.272	32.544	model.01	5	42.536	50.168	-16.268	32.536	0.0076	1	0.9307	nsig	X197.1007_4.8	nHILIC	[M-H]-		1-[2-Methyl-3-(methylthio) allyl]cyclohex-2-enol	HMDB0094658	NA	3
Single_Model	314.208	-0.21128	0.49233	-0.429143	0.667819		Anova	model.00	4	40.544	46.649	-16.272	32.544	model.01	5	42.357	49.989	-16.179	32.357	0.1862	1	0.6661	nsig	X314.2084_5.6	nHILIC	[M-H]-		Val-Val-Val	HMDB0094676	NA	3
Single_Model	195.123	0.285459	0.280008	1.01947	0.307982		Anova	model.00	4	40.544	46.649	-16.272	32.544	model.01	5	41.457	49.089	-15.729	31.457	1.0864	1	0.2973	nsig	X195.1231_11.9	pHILIC	[M+H]+		Tetraethylene glycol	HMDB0094708	NA	3
Single_Model	245.012	-0.591647	0.396392	-1.49258	0.135548		Anova	model.00	4	40.544	46.649	-16.272	32.544	model.01	5	39.124	46.756	-14.562	29.124	3.4194	1	0.06443	nsig	X245.0116_4.1	nRPLC	[M-H]-		3-[3-(Sulfooxy)phenyl]propanoic acid	HMDB0094710	NA	3
Single_Model	367.158	-0.288241	0.242927	-1.18653	0.235411		Anova	model.00	4	40.544	46.649	-16.272	32.544	model.01	5	41.013	48.645	-15.507	31.013	1.5303	1	0.2161	nsig	X367.1581_9.4	nRPLC	[M-H]-		Dehydroisoandrosterone sulfate (DHEA-S)	HMDB01032	C04555	2
Single_Model	303.232	1.22706	0.916744	1.33849	0.180735		Anova	model.00	4	40.544	46.649	-16.272	32.544	model.01	5	40.287	47.919	-15.144	30.287	2.2563	1	0.1331	nsig	X303.2322_11.7	nRPLC	[M-H]-	0.809404	C20:4 FA (Arachidonic acid)	HMDB01043	C00219	2
Single_Model	606.084	0.140216	0.221213	0.633851	0.526178		Anova	model.00	4	40.544	46.649	-16.272	32.544	model.01	5	42.132	49.764	-16.066	32.132	0.4119	1	0.521	nsig	X606.0844_11.8	pHILIC	[M+H]+	0.743368	Guanosine 5'-diphospho-.alpha.-D-mannose	HMDB01163	C00096	2
Single_Model	171.041	-0.695138	0.581471	-1.19548	0.231899		Anova	model.00	4	40.544	46.649	-16.272	32.544	model.01	5	40.947	48.579	-15.473	30.947	1.5969	1	0.2063	nsig	X171.0412_8.7	nHILIC	[M-H]-		Hydantoin propionic acid	HMDB01212	C05565	1
Single_Model	497.077	0.625235	0.357758	1.74765	0.0805245		Anova	model.00	4	40.544	46.649	-16.272	32.544	model.01	5	38.795	46.426	-14.397	28.795	3.7491	1	0.05284	nsig	X497.0772_3.9	nRPLC	[M-H]-		{[6-(5,7-dihydroxy-4-oxo-2-phenyl-3,4-dihydro-2H-1-benzopyran-8-yl)-3,4,5-trihydroxyoxan-2-yl]methoxy}sulfonic acid	HMDB0124786	NA	3
Single_Model	347.113	-0.714223	0.453635	-1.57444	0.115385		Anova	model.00	4	40.544	46.649	-16.272	32.544	model.01	5	36.797	44.429	-13.399	26.797	5.7465	1	0.01652	nsig	X347.1126_6	nHILIC	[M-H]-		1-(2,4,6-trihydroxyphenyl)-3-(3,4,5-trimethoxyphenyl)propan-1-one	HMDB0124870	NA	3
Single_Model	211.025	-0.533439	0.546181	-0.976671	0.328732		Anova	model.00	4	40.544	46.649	-16.272	32.544	model.01	5	41.475	49.107	-15.738	31.475	1.0683	1	0.3013	nsig	X211.0247_8.9	nHILIC	[M-H]-		2-oxo-3-(3,4,5-trihydroxyphenyl)propanoic acid	HMDB0125210	NA	3
Single_Model	389.072	-0.464564	0.563141	-0.824952	0.409399		Anova	model.00	4	40.544	46.649	-16.272	32.544	model.01	5	41.841	49.473	-15.921	31.841	0.7024	1	0.402	nsig	X389.0724_4.8	pRPLC	[M+H]+		6-[5-(2-carboxy-2-oxoethyl)-2,3-dihydroxyphenoxy]-3,4,5-trihydroxyoxane-2-carboxylic acid	HMDB0125277	NA	3
Single_Model	281.103	-0.266985	0.702086	-0.380274	0.703742		Anova	model.00	4	40.544	46.649	-16.272	32.544	model.01	5	42.353	49.984	-16.176	32.353	0.191	1	0.6621	nsig	X281.1028_4.9	nRPLC	[M-H]-		2-[4,6-dihydroxy-3-(4-hydroxy-3-methylbut-2-en-1-yl)-2-methoxyphenyl]acetic acid	HMDB0125459	NA	3
Single_Model	421.066	0.0779259	0.258624	0.30131	0.763178		Anova	model.00	4	40.544	46.649	-16.272	32.544	model.01	5	42.447	50.079	-16.224	32.447	0.0968	1	0.7558	nsig	X421.0656_10.7	nHILIC	[M-H]-		{[3,4-dihydroxy-5-(hydroxymethyl)-2-{[3,4,5-trihydroxy-6-(hydroxymethyl)oxan-2-yl]oxy}oxolan-2-yl]methoxy}sulfonic acid	HMDB0125625	NA	3
Single_Model	449.091	-0.77873	0.513659	-1.51605	0.129507		Anova	model.00	4	40.544	46.649	-16.272	32.544	model.01	5	39.806	47.438	-14.903	29.806	2.7372	1	0.09804	nsig	X449.0907_1.4	nRPLC	[M-H]-		{4-[3-(4,5-dihydroxy-7-methoxy-2,2-dimethyl-3,4-dihydro-2H-1-benzopyran-6-yl)-3-oxoprop-1-en-1-yl]phenyl}oxidanesulfonic acid	HMDB0125810	NA	3
Single_Model	431.079	-1.04122	0.0190339	-54.7033	0		Anova	model.00	4	40.544	46.649	-16.272	32.544	model.01	5	40.559	48.191	-15.28	30.559	1.9846	1	0.1589	nsig	X431.0788_1	nRPLC	[M-H]-		{2-hydroxy-5-[3-(5-methoxy-2,2-dimethyl-2H-chromen-6-yl)prop-2-enoyl]phenyl}oxidanesulfonic acid	HMDB0125863	NA	3
Single_Model	517.15	0.0973268	0.387461	0.251191	0.801666		Anova	model.00	4	40.544	46.649	-16.272	32.544	model.01	5	42.479	50.111	-16.239	32.479	0.0649	1	0.799	nsig	X517.1498_6.1	nRPLC	[M-H]-		6-(2,4-dihydroxyphenyl)-2-{3-[(2E)-3-(2,4-dihydroxyphenyl)prop-2-enoyl]-2,6-dihydroxyphenyl}-4-methylcyclohex-3-ene-1-carboxylic acid	HMDB0126378	NA	3
Single_Model	639.154	0.0766776	0.33638	0.227949	0.819686		Anova	model.00	4	40.544	46.649	-16.272	32.544	model.01	5	42.49	50.122	-16.245	32.49	0.0533	1	0.8175	nsig	X639.154_6.5	pHILIC	[M+H]+		3,4,5-trihydroxy-6-{[5-hydroxy-2-(4-hydroxyphenyl)-7-methoxy-4-oxo-8-[3,4,5-trihydroxy-6-(hydroxymethyl)oxan-2-yl]-4H-chromen-6-yl]oxy}oxane-2-carboxylic acid	HMDB0127143	NA	3
Single_Model	563.138	-1.56062	1.13112	-1.37971	0.167677		Anova	model.00	4	40.544	46.649	-16.272	32.544	model.01	5	39.382	47.014	-14.691	29.382	3.1618	1	0.07538	nsig	X563.1384_5.6	pHILIC	[M+H]+		3,4,5-trihydroxy-6-{[7-hydroxy-4-oxo-2-phenyl-8-(3,4,5-trihydroxyoxan-2-yl)-4H-chromen-5-yl]oxy}oxane-2-carboxylic acid	HMDB0127263	NA	3
Single_Model	601.227	0.50467	0.437822	1.15268	0.24904		Anova	model.00	4	40.544	46.649	-16.272	32.544	model.01	5	40.634	48.266	-15.317	30.634	1.9097	1	0.167	nsig	X601.2273_11.7	nRPLC	[M-H]-		{[3-(2-methyl-1,3-thiazol-4-yl)-2-[(16R)-5,7,11-trihydroxy-8,8,10,12,16-pentamethyl-9-oxo-17-oxa-4-azabicyclo[14.1.0]heptadec-4-en-3-yl]prop-2-en-1-yl]oxy}sulfonic acid	HMDB0127552	NA	3
Single_Model	213.007	-0.204751	0.412506	-0.496358	0.619642		Anova	model.00	4	40.544	46.649	-16.272	32.544	model.01	5	42.293	49.925	-16.146	32.293	0.2507	1	0.6166	nsig	X213.0074_8	nHILIC	[M-H]-		3-hydroxy-2-methyl-2-[(sulfooxy)methyl]propanoic acid	HMDB0127651	NA	3
Single_Model	231.017	-0.420936	0.477612	-0.881335	0.378137		Anova	model.00	4	40.544	46.649	-16.272	32.544	model.01	5	41.639	49.27	-15.819	31.639	0.905	1	0.3414	nsig	X231.0172_1.5	pRPLC	[M+H]+		3-hydroxy-2-(hydroxymethyl)-2-[(sulfooxy)methyl]propanoic acid	HMDB0127656	NA	3
Single_Model	316.059	-0.433692	0.449923	-0.963924	0.335084		Anova	model.00	4	40.544	46.649	-16.272	32.544	model.01	5	41.59	49.222	-15.795	31.59	0.9539	1	0.3287	nsig	X316.0594_12.6	nHILIC	[M-H]-		3,5,6,7-tetrahydroxy-2-(4-hydroxy-3-methoxyphenyl)-8aH-chromen-8a-yl	HMDB0128108	NA	3
Single_Model	343.044	0.546644	0.729679	0.749158	0.453762		Anova	model.00	4	40.544	46.649	-16.272	32.544	model.01	5	41.891	49.522	-15.945	31.891	0.6531	1	0.419	nsig	X343.0436_0.7	pRPLC	[M+H]+		4,13,14-trihydroxy-9-oxo-8,17-dioxatetracyclo[8.7.0.0²,7.0¹¹,¹6]heptadeca-1(10),2,4,6,11(16),12,14-heptaen-5-yl acetate	HMDB0128437	NA	3
Single_Model	246.042	-2.12807	1.12482	-1.89192	0.0585011		Anova	model.00	4	40.544	46.649	-16.272	32.544	model.01	5	36.227	43.858	-13.113	26.227	6.317	1	0.01196	nsig	X246.0415_9.7	nHILIC	[M-H]-		2-{[hydroxy(1-oxo-1H-isochromen-3-yl)methylidene]amino}acetic acid	HMDB0128628	NA	3
Single_Model	367.068	-0.244847	0.399608	-0.612718	0.540063		Anova	model.00	4	40.544	46.649	-16.272	32.544	model.01	5	42.138	49.769	-16.069	32.138	0.4061	1	0.5239	nsig	X367.0679_5.8	nRPLC	[M-H]-		3,4,5-trihydroxy-6-{[3-(hydroxymethyl)-1-oxo-1H-isochromen-7-yl]oxy}oxane-2-carboxylic acid	HMDB0128633	NA	3
Single_Model	269.066	-0.610331	0.503705	-1.21168	0.225634		Anova	model.00	4	40.544	46.649	-16.272	32.544	model.01	5	40.847	48.479	-15.424	30.847	1.6964	1	0.1928	nsig	X269.0657_6.2	pHILIC	[M+H]+		3-(6,7-dimethoxy-2H-1,3-benzodioxol-5-yl)oxirane-2-carboxylic acid	HMDB0128678	NA	3
Single_Model	537.091	-0.353786	0.429894	-0.822962	0.41053		Anova	model.00	4	40.544	46.649	-16.272	32.544	model.01	5	41.759	49.391	-15.88	31.759	0.7843	1	0.3758	nsig	X537.0913_5.8	nRPLC	[M-H]-		6-{[3,7-dihydroxy-2-(1-hydroxy-3-methoxy-4-oxocyclohexa-2,5-dien-1-yl)-6-methoxy-4-oxo-4H-chromen-5-yl]oxy}-3,4,5-trihydroxyoxane-2-carboxylic acid	HMDB0128780	NA	3
Single_Model	485.072	-0.390424	0.854357	-0.45698	0.647685		Anova	model.00	4	40.544	46.649	-16.272	32.544	model.01	5	42.339	49.97	-16.169	32.339	0.2051	1	0.6507	nsig	X485.0717_8.5	nHILIC	[M-H]-		3,4,5-trihydroxy-6-({11-hydroxy-13-oxo-6,8,20-trioxapentacyclo[10.8.0.0²,<U+2079>.0³,7.0¹4,¹<U+2079>]icosa-1(12),2(9),4,10,14(19),15,17-heptaen-15-yl}oxy)oxane-2-carboxylic acid	HMDB0128870	NA	3
Single_Model	353.067	-0.566858	0.229439	-2.47063	0.0134876		Anova	model.00	4	40.544	46.649	-16.272	32.544	model.01	5	42.827	50.459	-16.414	32.827	0	1	1	nsig	X353.067_3.9	nRPLC	[M-H]-		17-hydroxy-11,15-dimethoxy-6,8,20-trioxapentacyclo[10.8.0.0²,<U+2079>.0³,7.0¹4,¹<U+2079>]icosa-1(12),2(9),4,10,14,16,18-heptaen-13-one	HMDB0128873	NA	3
Single_Model	275.078	-0.139402	0.41944	-0.332352	0.739623		Anova	model.00	4	40.544	46.649	-16.272	32.544	model.01	5	42.434	50.066	-16.217	32.434	0.1097	1	0.7405	nsig	X275.0777_7	nHILIC	[M-H]-		3,4,5-trihydroxy-6-[(3-methylbut-2-enoyl)oxy]oxane-2-carboxylic acid	HMDB0128920	NA	3
Single_Model	194.997	0.214893	0.423309	0.507649	0.611699		Anova	model.00	4	40.544	46.649	-16.272	32.544	model.01	5	42.272	49.904	-16.136	32.272	0.2716	1	0.6023	nsig	X194.9968_5.4	nHILIC	[M-H]-		3-methyl-4-(sulfooxy)but-2-enoic acid	HMDB0128930	NA	3
Single_Model	471.168	-1.91237	1.40917	-1.35709	0.174752		Anova	model.00	4	40.544	46.649	-16.272	32.544	model.01	5	40.29	47.922	-15.145	30.29	2.2533	1	0.1333	nsig	X471.168_4.7	nRPLC	[M-H]-		3,4,5-trihydroxy-6-{3-hydroxy-5-[(E)-2-(4-hydroxyphenyl)ethenyl]-2-[(1E)-3-methylbut-1-en-1-yl]phenoxy}oxane-2-carboxylic acid	HMDB0128994	NA	3
Single_Model	309.045	1.07072	0.71389	1.49984	0.133655		Anova	model.00	4	40.544	46.649	-16.272	32.544	model.01	5	39.84	47.472	-14.92	29.84	2.7035	1	0.1001	nsig	X309.0453_0.7	nRPLC	[M-H]-		{3-[2-(3,5-dihydroxyphenyl)ethyl]phenyl}oxidanesulfonic acid	HMDB0129951	NA	3
Single_Model	238.072	0.100419	0.352009	0.285273	0.775435		Anova	model.00	4	40.544	46.649	-16.272	32.544	model.01	5	42.462	50.094	-16.231	32.462	0.0818	1	0.7748	nsig	X238.0719_2	nHILIC	[M-H]-		2-{[(3,5-dimethoxyphenyl)(hydroxy)methylidene]amino}acetic acid	HMDB0131468	NA	3
Single_Model	513.033	1.75843	1.00336	1.75255	0.0796791		Anova	model.00	4	40.544	46.649	-16.272	32.544	model.01	5	37.067	44.699	-13.534	27.067	5.4767	1	0.01927	nsig	X513.0332_9.5	nRPLC	[M-H]-		[5-(3-{[3,4-dihydroxy-5-(hydroxymethyl)oxolan-2-yl]oxy}-5,7-dihydroxy-4-oxo-4H-chromen-2-yl)-2-hydroxyphenyl]oxidanesulfonic acid	HMDB0132728	NA	3
Single_Model	369.155	-1.38	0.791445	-1.74365	0.08122		Anova	model.00	4	40.544	46.649	-16.272	32.544	model.01	5	35.12	42.751	-12.56	25.12	7.424	1	0.006436	nsig	X369.1553_5.6	nHILIC	[M-H]-		3,4,5-trihydroxy-6-{[1-(4-methoxyphenyl)pentan-3-yl]oxy}oxane-2-carboxylic acid	HMDB0133009	NA	3
Single_Model	657.095	0.149223	0.444183	0.335949	0.736909		Anova	model.00	4	40.544	46.649	-16.272	32.544	model.01	5	42.431	50.063	-16.216	32.431	0.1125	1	0.7373	nsig	X657.0952_6.1	nRPLC	[M-H]-		3,4,5-trihydroxy-6-({7,8,11,12,13,21,22,23-octahydroxy-3,16-dioxo-2,17,20-trioxatetracyclo[17.3.1.04,<U+2079>.0¹°,¹5]tricosa-4,6,8,10,12,14-hexaen-6-yl}oxy)oxane-2-carboxylic acid	HMDB0133400	NA	3
Single_Model	709.065	-0.0894554	0.271613	-0.329349	0.741892		Anova	model.00	4	40.544	46.649	-16.272	32.544	model.01	5	42.434	50.066	-16.217	32.434	0.1097	1	0.7405	nsig	X709.0649_4.5	nRPLC	[M-H]-		2,3,4,7,8,9,15,22,23,28-decahydroxy-14-(hydroxymethyl)-13,25,32,35-tetraoxaoctacyclo[14.13.3.3¹7,²6.05,³°.06,¹¹.0¹8,²6.0¹<U+2079>,²4.0²<U+2079>,³³]pentatriaconta-1,3,5(30),6,8,10,19(24),20,22,28-decaene-12,27,31,34-tetrone	HMDB0134686	NA	3
Single_Model	307.065	0.538505	0.282016	1.90949	0.0561992		Anova	model.00	4	40.544	46.649	-16.272	32.544	model.01	5	38.326	45.958	-14.163	28.326	4.2179	1	0.04	nsig	X307.0646_8.1	pHILIC	[M+H]+		(3-oxo-1,3-diphenylpropoxy)sulfonic acid	HMDB0135218	NA	3
Single_Model	440.138	-0.501858	0.499444	-1.00483	0.314978		Anova	model.00	4	40.544	46.649	-16.272	32.544	model.01	5	41.381	49.013	-15.691	31.381	1.1623	1	0.281	nsig	X440.1376_6.5	pHILIC	[M+H]+		N-[2-(3,4-dimethoxyphenyl)ethyl]-3-[4-methoxy-3-(sulfooxy)phenyl]propanimidic acid	HMDB0135510	NA	3
Single_Model	259.022	0.119732	0.462426	0.258923	0.795695		Anova	model.00	4	40.544	46.649	-16.272	32.544	model.01	5	42.474	50.106	-16.237	32.474	0.0699	1	0.7914	nsig	X259.0221_12.1	nHILIC	[M-H]-	0.809725	Glucose 6-phosphate	HMDB01401	C00092	2
Single_Model	226.107	0.0327727	0.226739	0.144539	0.885075		Anova	model.00	4	40.544	46.649	-16.272	32.544	model.01	5	42.523	50.155	-16.261	32.523	0.0208	1	0.8852	nsig	X226.1073_10.2	pHILIC	[M+H]+		(2S)-2-amino-3-(4-hydroxy-3-methoxyphenyl)-2-methylpropanoic acid	HMDB0142154	NA	3
Single_Model	445.053	0.232476	0.214189	1.08538	0.277754		Anova	model.00	4	40.544	46.649	-16.272	32.544	model.01	5	41.188	48.82	-15.594	31.188	1.3555	1	0.2443	nsig	X445.0529_11.6	nHILIC	[M-H]-	0.708454	Cytidine 5'-diphosphate ethanolamine	HMDB01564	C00570	2
Single_Model	225.186	0.606759	0.848438	0.715148	0.474517		Anova	model.00	4	40.544	46.649	-16.272	32.544	model.01	5	41.943	49.575	-15.972	31.943	0.6003	1	0.4385	nsig	X225.1857_10.7	nRPLC	[M-H]-		C14:1 FA (Myristoleic acid)	HMDB02000	C08322	2
Single_Model	232.154	-0.126936	0.236399	-0.536958	0.591297		Anova	model.00	4	40.544	46.649	-16.272	32.544	model.01	5	42.256	49.888	-16.128	32.256	0.2872	1	0.592	nsig	X232.1542_6.8	pHILIC	[M+H]+	0.784472	C4:0 AC (Butyrylcarnitine|Isobutyryl-L-carnitine)	HMDB02013	C02862	2
Single_Model	370.294	-0.552247	0.350312	-1.57644	0.114924		Anova	model.00	4	40.544	46.649	-16.272	32.544	model.01	5	40.073	47.705	-15.037	30.073	2.4704	1	0.116	nsig	X370.2938_8.9	pRPLC	[M+H]+		C14:1 AC (Tetradecenoylcarnitine)	HMDB02014	NA	2
Single_Model	248.113	-0.124617	0.286711	-0.434642	0.663823		Anova	model.00	4	40.544	46.649	-16.272	32.544	model.01	5	42.356	49.988	-16.178	32.356	0.1879	1	0.6646	nsig	X248.1135_11	pHILIC	[M+H]+	0.812489	C3:0,DC AC (Malonylcarnitine)	HMDB02095	NA	2
Single_Model	309.28	0.167274	0.350289	0.477532	0.632983		Anova	model.00	4	40.544	46.649	-16.272	32.544	model.01	5	42.312	49.943	-16.156	32.312	0.232	1	0.6301	nsig	X309.28_11.2	nRPLC	[M-H]-		C20:1 FA (Eicosenoic acid)	HMDB02231	C16526	2
Single_Model	344.278	0.234132	0.299017	0.783006	0.433624		Anova	model.00	4	40.544	46.649	-16.272	32.544	model.01	5	41.903	49.535	-15.951	31.903	0.6407	1	0.4235	nsig	X344.2783_8.4	pRPLC	[M+H]+	0.777483	C12:0 AC (Dodecanoylcarnitine)	HMDB02250	NA	1
Single_Model	243.196	0.569046	0.446676	1.27395	0.202679		Anova	model.00	4	40.544	46.649	-16.272	32.544	model.01	5	40.669	48.301	-15.334	30.669	1.8749	1	0.1709	nsig	X243.1965_10.6	nRPLC	[M-H]-		C14:0,OH FA (Hydroxy-myristic acid)	HMDB02261	NA	2
Single_Model	244.154	-0.328138	0.325122	-1.00928	0.312842		Anova	model.00	4	40.544	46.649	-16.272	32.544	model.01	5	41.474	49.105	-15.737	31.474	1.0701	1	0.3009	nsig	X244.1542_6.6	pHILIC	[M+H]+		C5:1 AC (Tiglylcarnitine)	HMDB02366	NA	2
Single_Model	299.201	1.96409	1.14519	1.71508	0.0863306		Anova	model.00	4	40.544	46.649	-16.272	32.544	model.01	5	36.547	44.179	-13.274	26.547	5.9964	1	0.01433	nsig	X299.2012_10.8	nRPLC	[M-H]-		C20:6 FA (Retinoic acid)	HMDB02369	C15493	2
Single_Model	531.215	0.0481984	0.394353	0.122221	0.902724		Anova	model.00	4	40.544	46.649	-16.272	32.544	model.01	5	42.529	50.161	-16.264	32.529	0.0149	1	0.9029	nsig	X531.2145_6.1	nRPLC	[M-H]-		Ponatinib	HMDB0240214	NA	3
Single_Model	370.076	0.0600893	0.457029	0.131478	0.895397		Anova	model.00	4	40.544	46.649	-16.272	32.544	model.01	5	42.526	50.158	-16.263	32.526	0.0174	1	0.895	nsig	X370.0764_1.6	nRPLC	[M-H]-		Salicyluric beta-D-glucuronide	HMDB0240252	NA	3
Single_Model	262.104	0.654966	0.696721	0.940069	0.347182		Anova	model.00	4	40.544	46.649	-16.272	32.544	model.01	5	41.595	49.226	-15.797	31.595	0.9491	1	0.3299	nsig	X262.1042_9.6	nHILIC	[M-H]-		Creatine riboside	HMDB0240254	NA	3
Single_Model	247.144	-0.505457	0.786355	-0.642785	0.520364		Anova	model.00	4	40.544	46.649	-16.272	32.544	model.01	5	42.125	49.757	-16.063	32.125	0.4183	1	0.5178	nsig	X247.144_5.3	pHILIC	[M+H]+	0.785779	Tryptophan betaine	HMDB0240261	NA	1
Single_Model	599.321	0.217243	0.233478	0.930463	0.352131		Anova	model.00	4	40.544	46.649	-16.272	32.544	model.01	5	41.604	49.236	-15.802	31.604	0.9396	1	0.3324	nsig	X599.3208_6.6	nHILIC	[M-H]-		LysoPI(18:0)	HMDB0240262	NA	2
Single_Model	122.081	-0.726214	0.464897	-1.5621	0.118265		Anova	model.00	4	40.544	46.649	-16.272	32.544	model.01	5	39.406	47.038	-14.703	29.406	3.1375	1	0.07651	nsig	X122.0813_7.9	pHILIC	[M+H]+		Tromethamine	HMDB0240288	NA	3
Single_Model	143.082	-0.356634	0.392029	-0.909713	0.362974		Anova	model.00	4	40.544	46.649	-16.272	32.544	model.01	5	41.671	49.302	-15.835	31.671	0.873	1	0.3501	nsig	X143.0815_4.3	pHILIC	[M+H]+	0.693691	Ectoine	HMDB0240650	C06231	2
Single_Model	171.006	5.48675	3.21417	1.70705	0.0878128		Anova	model.00	4	40.544	46.649	-16.272	32.544	model.01	5	33.356	40.988	-11.678	23.356	9.1878	1	0.002436	nsig	X171.0064_11.1	nHILIC	[M-H]-	0.807478	.beta.-Glycerophosphate	HMDB02520	C02979	2
Single_Model	253.217	1.23083	1.11957	1.09937	0.271606		Anova	model.00	4	40.544	46.649	-16.272	32.544	model.01	5	41.201	48.833	-15.601	31.201	1.3424	1	0.2466	nsig	X253.2169_11.3	nRPLC	[M-H]-		C16:1 FA (Palmitoleic acid)	HMDB03229	C08362	2
Single_Model	157.025	0.260179	0.442126	0.588473	0.556215		Anova	model.00	4	40.544	46.649	-16.272	32.544	model.01	5	42.163	49.795	-16.082	32.163	0.3804	1	0.5374	nsig	X157.0254_7.8	nHILIC	[M-H]-		Dihydroorotic acid	HMDB03349	C00337	1
Single_Model	197.128	-0.572407	0.382584	-1.49616	0.134612		Anova	model.00	4	40.544	46.649	-16.272	32.544	model.01	5	39.918	47.549	-14.959	29.918	2.6261	1	0.1051	nsig	X197.1283_4.9	pHILIC	[M+H-H2O]+	0.775387	D-Desthiobiotin	HMDB03581	C01909	2
Single_Model	224.062	-5.2267	3.87539	-1.34869	0.177436		Anova	model.00	4	40.544	46.649	-16.2718	32.544	model.01	5	24.368	32	-7.1839	14.368	18.176	1	2.014e-05	nsig	X224.0617_4.9	nHILIC	[M-H]-	0.828042	Androstenediol (3beta,17beta) disulfate	HMDB03818	C04295	2
Single_Model	276.155	0.716949	1.03878	0.690181	0.49008		Anova	model.00	4	40.544	46.649	-16.272	32.544	model.01	5	42.072	49.703	-16.036	32.072	0.4721	1	0.492	nsig	X276.1553_13.6	pHILIC	[M+H]+		gamma-glutamyl-epsilon-lysine	HMDB03869	NA	1
Single_Model	276.155	0.190342	0.429082	0.443604	0.657329		Anova	model.00	4	40.544	46.649	-16.272	32.544	model.01	5	42.344	49.976	-16.172	32.344	0.1992	1	0.6554	nsig	X276.1554_11.8	pHILIC	[M+H]+		L-a-glutamyl-L-Lysine	HMDB04207	C04700	2
Single_Model	217.129	0.182989	0.204727	0.89382	0.371418		Anova	model.00	4	40.544	46.649	-16.272	32.544	model.01	5	41.692	49.324	-15.846	31.692	0.8518	1	0.3561	nsig	X217.1294_9	pHILIC	[M+H]+		N-Acetylarginine	HMDB04620	NA	1
Single_Model	329.233	1.16889	0.729404	1.60252	0.10904		Anova	model.00	4	40.544	46.649	-16.272	32.544	model.01	5	39.637	47.269	-14.819	29.637	2.9062	1	0.08824	nsig	X329.233_8.3	nRPLC	[M-H]-		C18:1,3OH FA (Trihydroxy-octadecenoic acid)	HMDB04710	C14835	2
Single_Model	321.243	1.37342	0.714659	1.92178	0.054634		Anova	model.00	4	40.544	46.649	-16.272	32.544	model.01	5	35.31	42.942	-12.655	25.31	7.2333	1	0.007156	nsig	X321.2434_10.6	nRPLC	[M-H]-		C20:3,OH FA (Hydroxy-eicosatrienoic acid)	HMDB05045	C00861	2
Single_Model	372.311	-0.0674661	0.506565	-0.133183	0.894048		Anova	model.00	4	40.544	46.649	-16.272	32.544	model.01	5	42.526	50.158	-16.263	32.526	0.0177	1	0.8942	nsig	X372.3106_5.5	pHILIC	[M+H]+		C14:0 AC (Tetradecanoylcarnitine)	HMDB05066	NA	1
Single_Model	313.175	-0.686488	0.564705	-1.21566	0.224115		Anova	model.00	4	40.544	46.649	-16.272	32.544	model.01	5	40.875	48.507	-15.438	30.875	1.6687	1	0.1964	nsig	X313.1751_0.9	nHILIC	[M-H]-	0.67663	all-trans-4-Ketoretinoic acid	HMDB06285	C16678	2
Single_Model	398.325	-0.104183	0.286968	-0.363048	0.716569		Anova	model.00	4	40.544	46.649	-16.272	32.544	model.01	5	42.406	50.038	-16.203	32.406	0.1372	1	0.7111	nsig	X398.3252_9.7	pRPLC	[M+H]+		C16:1 AC (Hexadecenoyl carnitine)	HMDB06317	NA	2
Single_Model	424.341	0.388827	0.538033	0.722683	0.469875		Anova	model.00	4	40.544	46.649	-16.272	32.544	model.01	5	42.001	49.633	-16.001	32.001	0.5422	1	0.4615	nsig	X424.3411_10	pRPLC	[M+H]+	0.799307	C18:2 AC (Linoleyl carnitine)	HMDB06461	NA	2
Single_Model	275.201	1.5555	0.981561	1.58473	0.113029		Anova	model.00	4	40.544	46.649	-16.272	32.544	model.01	5	38.087	45.719	-14.044	28.087	4.4565	1	0.03477	nsig	X275.2013_10.9	nRPLC	[M-H]-		C18:4 FA (Octadecatetraenoic acid)	HMDB06547	C16300	2
Single_Model	524.37	0.591115	0.383647	1.54078	0.12337		Anova	model.00	4	40.544	46.649	-16.272	32.544	model.01	5	39.666	47.298	-14.833	29.666	2.8773	1	0.08984	nsig	X524.3695_11.8	pRPLC	[M+H]+	0.783204	LysoPC(18:0)	HMDB10384	C04230	2
Single_Model	227.14	-0.539254	0.808311	-0.667137	0.504685		Anova	model.00	4	40.544	46.649	-16.272	32.544	model.01	5	42.099	49.731	-16.049	32.099	0.4449	1	0.5047	nsig	X227.1401_6.1	nHILIC	[M-H]-	0.677543	Ile-Pro	HMDB11174	NA	2
Single_Model	263.139	0.741335	0.706156	1.04982	0.293802		Anova	model.00	4	40.544	46.649	-16.272	32.544	model.01	5	41.325	48.956	-15.662	31.325	1.2191	1	0.2695	nsig	X263.1389_6.2	pHILIC	[M+H]+	0.658183	Pro-Phe	HMDB11179	NA	2
Single_Model	315.254	-0.293121	0.311313	-0.941562	0.346417		Anova	model.00	4	40.544	46.649	-16.272	32.544	model.01	5	41.589	49.221	-15.795	31.589	0.9542	1	0.3287	nsig	X315.254_9.5	nRPLC	[M-H]-		MG(15:0)	HMDB11532	NA	2
Single_Model	357.299	-0.808959	0.798014	-1.01372	0.310719		Anova	model.00	4	40.544	46.649	-16.272	32.544	model.01	5	41.45	49.082	-15.725	31.45	1.0938	1	0.2956	nsig	X357.2989_10.5	pRPLC	[M+H]+		MG(18:1)	HMDB11536	NA	2
Single_Model	275.088	0.200449	0.192073	1.04361	0.296666		Anova	model.00	4	40.544	46.649	-16.272	32.544	model.01	5	41.36	48.992	-15.68	31.36	1.1834	1	0.2767	nsig	X275.0883_11.8	nHILIC	[M-H]-	0.731853	L-.gamma.-Glutamyl-L-glutamic acid	HMDB11737	C05282	2
Single_Model	172.098	0.350353	0.846225	0.414019	0.67886		Anova	model.00	4	40.544	46.649	-16.272	32.544	model.01	5	42.371	50.003	-16.185	32.371	0.1729	1	0.6776	nsig	X172.0976_3.7	nRPLC	[M-H]-		N-Acetylleucine|N-Acetylisoleucine	HMDB11756|HMDB61684	C02710	1
Single_Model	510.354	0.608165	0.349026	1.74246	0.0814273		Anova	model.00	4	40.544	46.649	-16.272	32.544	model.01	5	38.563	46.194	-14.281	28.563	3.981	1	0.04602	nsig	X510.3539_11.3	pRPLC	[M+H]+	0.771952	LysoPC(17:0)	HMDB12108	C04230	2
Single_Model	248.149	-1.14617	0.745702	-1.53703	0.124286		Anova	model.00	4	40.544	46.649	-16.272	32.544	model.01	5	39.537	47.169	-14.769	29.537	3.0063	1	0.08294	nsig	X248.1492_8.6	pHILIC	[M+H]+	0.839398	C4:0,OH AC (Hydroxybutyrylcarnitine)	HMDB13127	NA	2
Single_Model	276.144	-0.738109	0.495048	-1.49098	0.135966		Anova	model.00	4	40.544	46.649	-16.272	32.544	model.01	5	40.146	47.778	-15.073	30.146	2.3979	1	0.1215	nsig	X276.1441_11.3	pHILIC	[M+H]+		C5:0, DC AC (Glutarylcarnitine)	HMDB13130	NA	2
Single_Model	276.18	-0.108112	0.684074	-0.158042	0.874424		Anova	model.00	4	40.544	46.649	-16.272	32.544	model.01	5	42.519	50.15	-16.259	32.519	0.0251	1	0.8742	nsig	X276.1804_7.8	pHILIC	[M+H]+		C6:0,OH AC (Hydroxyhexanoycarnitine)	HMDB13131	NA	2
Single_Model	258.17	-0.156548	0.183512	-0.853068	0.393622		Anova	model.00	4	40.544	46.649	-16.272	32.544	model.01	5	41.79	49.422	-15.895	31.79	0.7535	1	0.3854	nsig	X258.17_7.4	pHILIC	[M+H]+		C6:1 AC (Hexenoylcarnitine)	HMDB13161	NA	2
Single_Model	388.305	0.0724007	0.311708	0.232271	0.816327		Anova	model.00	4	40.544	46.649	-16.272	32.544	model.01	5	42.488	50.12	-16.244	32.488	0.0554	1	0.8139	nsig	X388.3055_6	pHILIC	[M+H]+		C14:0,OH AC (Hydroxy-myristoylcarnitine)	HMDB13166	NA	2
Single_Model	314.232	-0.344291	0.188105	-1.83031	0.0672031		Anova	model.00	4	40.544	46.649	-16.272	32.544	model.01	5	38.933	46.564	-14.466	28.933	3.611	1	0.0574	nsig	X314.2324_5.8	pHILIC	[M+H]+		C10:1 AC (Decenoylcarnitine)	HMDB13205	NA	2
Single_Model	302.232	-0.2824	0.210717	-1.34019	0.180185		Anova	model.00	4	40.544	46.649	-16.272	32.544	model.01	5	40.544	48.176	-15.272	30.544	1.9994	1	0.1574	nsig	X302.2323_5.8	pHILIC	[M+H]+		C9:0 AC (Nonanoylcarnitine)	HMDB13288	NA	2
Single_Model	386.29	-1.80208	1.02283	-1.76185	0.0780949		Anova	model.00	4	40.544	46.649	-16.272	32.544	model.01	5	31.035	38.667	-10.518	21.035	11.508	1	0.0006928	nsig	X386.2897_5.8	pHILIC	[M+H]+		C14:1,OH AC (Hydroxy-tetradecenoylcarnitine)	HMDB13330	NA	2
Single_Model	414.321	-0.104945	0.174222	-0.602365	0.546931		Anova	model.00	4	40.544	46.649	-16.272	32.544	model.01	5	42.182	49.814	-16.091	32.182	0.3618	1	0.5475	nsig	X414.321_6	pHILIC	[M+H]+		C16:1,OH AC (Hydroxyhexadecenoyl carnitine)	HMDB13333	NA	2
Single_Model	396.309	-0.11893	0.310092	-0.383533	0.701325		Anova	model.00	4	40.544	46.649	-16.272	32.544	model.01	5	42.396	50.027	-16.198	32.396	0.148	1	0.7005	nsig	X396.3093_9.2	pRPLC	[M+H]+		C16:2 AC (Hexadecadienoylcarnitine)	HMDB13334	NA	2
Single_Model	295.264	0.964661	0.588536	1.63909	0.101195		Anova	model.00	4	40.544	46.649	-16.272	32.544	model.01	5	39.514	47.146	-14.757	29.514	3.0298	1	0.08175	nsig	X295.264_13.4	nRPLC	[M-H]-		C19:1 FA (Nonadecaenoic acid)	HMDB13622	C00174	2
Single_Model	183.138	-0.87259	0.598831	-1.45716	0.145073		Anova	model.00	4	40.544	46.649	-16.272	32.544	model.01	5	40.13	47.761	-15.065	30.13	2.4142	1	0.1202	nsig	X183.1384_9	nRPLC	[M-H]-		C11:1 FA (Undecenoic acid)	HMDB33724	C13910	2
Single_Model	297.243	-0.452221	0.658248	-0.687007	0.492078		Anova	model.00	4	40.544	46.649	-16.272	32.544	model.01	5	42.053	49.685	-16.026	32.053	0.4908	1	0.4836	nsig	X297.2429_10.4	nRPLC	[M-H]-		C18:1,OH FA (Hydroxy-oleic acid)	HMDB34297	NA	2
Single_Model	169.123	-0.0883673	0.357038	-0.247501	0.80452		Anova	model.00	4	40.544	46.649	-16.272	32.544	model.01	5	42.481	50.113	-16.241	32.481	0.0627	1	0.8023	nsig	X169.1232_8.8	nRPLC	[M-H]-		C10:1 FA (Decenoic acid)	HMDB41012	NA	2
Single_Model	267.233	-0.80946	0.826867	-0.978948	0.327606		Anova	model.00	4	40.544	46.649	-16.272	32.544	model.01	5	41.441	49.073	-15.721	31.441	1.1022	1	0.2938	nsig	X267.2326_11.8	nRPLC	[M-H]-		C17:1 FA (Heptadecenoic acid)	HMDB60038	C16536	2
Single_Model	332.243	-0.129707	0.321576	-0.403348	0.686692		Anova	model.00	4	40.544	46.649	-16.272	32.544	model.01	5	42.379	50.01	-16.189	32.379	0.1651	1	0.6845	nsig	X332.2429_6.3	pHILIC	[M+H]+		C10:0,OH AC (Hydroxydecanoyl carnitine)	HMDB61636	NA	2
Single_Model	290.159	-1.66088	1.07754	-1.54136	0.123229		Anova	model.00	4	40.544	46.649	-16.272	32.544	model.01	5	35.554	43.186	-12.777	25.554	6.9892	1	0.0082	nsig	X290.1595_11.1	pHILIC	[M+H]+		C6:0,DC AC (Adipoylcarnitine)	HMDB61677	NA	2
Single_Model	619.288	0.561907	0.304917	1.84282	0.0653555		Anova	model.00	4	40.544	46.649	-16.272	32.544	model.01	5	37.535	45.166	-13.767	27.535	5.0091	1	0.02521	nsig	X619.2882_12.8	nRPLC	[M-H]-		LysoPI(20:4)	HMDB61690	NA	2
Single_Model	597.304	0.167186	0.225919	0.740026	0.459284		Anova	model.00	4	40.544	46.649	-16.272	32.544	model.01	5	41.976	49.608	-15.988	31.976	0.5676	1	0.4512	nsig	X597.3036_13.6	nRPLC	[M-H]-		LysoPI(18:1)	HMDB61693	NA	2
Single_Model	262.128	-1.32143	0.873105	-1.51349	0.130156		Anova	model.00	4	40.544	46.649	-16.272	32.544	model.01	5	39.926	47.558	-14.963	29.926	2.6174	1	0.1057	nsig	X262.1284_11.4	pHILIC	[M+H]+		C4:0,DC AC (Succinylcarnitine)	HMDB61717	NA	2
Single_Model	241.073	-0.13842	0.513803	-0.269403	0.78762		Anova	model.00	4	40.544	46.649	-16.272	32.544	model.01	5	42.477	50.109	-16.239	32.477	0.0663	1	0.7968	nsig	X241.0731_0.9	nHILIC	[M-H]-		Lumichrome	METPA0216	C01727	3
Single_Model	196.037	-0.0125743	0.24202	-0.0519558	0.958564		Anova	model.00	4	40.544	46.649	-16.272	32.544	model.01	5	42.541	50.173	-16.27	32.541	0.0027	1	0.9586	nsig	X196.0366_4.1	pRPLC	[M+H]+		3,4-dihydroxyphenylpyruvate	METPA0460	C04045	3
Single_Model	242.043	-0.226339	0.256974	-0.880785	0.378434		Anova	model.00	4	40.544	46.649	-16.272	32.544	model.01	5	41.715	49.347	-15.858	31.715	0.8282	1	0.3628	nsig	X242.0434_8.4	nHILIC	[M-H]-		1-alkyl-2-acylglycerophosphoethanolamine	METPA0499	C04475	3
Single_Model	296.992	0.032108	0.252619	0.127101	0.898861		Anova	model.00	4	40.544	46.649	-16.272	32.544	model.01	5	42.528	50.159	-16.264	32.528	0.0161	1	0.899	nsig	X296.9922_3.2	pRPLC	[M+H]+		4-amino-2-methyl-5-diphosphomethylpyrimidine	METPA0538	C04752	3
Single_Model	168.077	0.00395352	0.336319	0.0117553	0.990621		Anova	model.00	4	40.544	46.649	-16.272	32.544	model.01	5	42.544	50.175	-16.272	32.544	0.0001	1	0.9906	nsig	X168.0766_9.9	pHILIC	[M+H]+	0.659378	Carbazole	METPA0957	C08060	2
Single_Model	364.082	0.31312	0.340238	0.920298	0.357417		Anova	model.00	4	40.544	46.649	-16.272	32.544	model.01	5	41.625	49.257	-15.813	31.625	0.9184	1	0.3379	nsig	X364.0819_11.5	nHILIC	[M-H]-		2-S-glutathionyl acetate	METPA1170	C14862	3

## Sheet: List_MD
Glmer_status	MZ	Estimate	Std.Error	zvalue	Pr(>|z|)		Glmer_Anova	Anova_model00	npar	AIC	BIC	logLik	deviance	Anova_model.01	npar	AIC	BIC	logLik	deviance	Chisq	Df	Pr(>Chisq)	Significant status considered	RT	Mode	Adduct	Metabolite	HMDB	KEGG	MSI_level	Total_Score
Single_Model	227.114	-2.80373	0.772394	-3.62993	0.000283504		Anova	model.00	4	85.494	94.252	-38.747	77.494	model.01	5	49.164	60.112	-19.582	39.164	38.33	1	5.97e-10	sig	11.9	pHILIC	[M+H]+	L-Carnosine	HMDB0000033	C00386	1	0.837314
Single_Model	136.062	1.91868	0.532977	3.59993	0.000318303		Anova	model.00	4	85.494	94.252	-38.747	77.494	model.01	5	64.344	75.292	-27.172	54.344	23.15	1	1.499e-06	sig	2.3	pHILIC	[M+H]+	Adenine	HMDB0000034	C00147	1	0.85219
Single_Model	252.109	2.38113	0.801155	2.97212	0.00295749		Anova	model.00	4	85.494	94.252	-38.747	77.494	model.01	5	60.794	71.742	-25.397	50.794	26.7	1	2.38e-07	sig	1.8	pHILIC	[M+H]+	2'-Deoxyadenosine	HMDB0000101	C00559	2	0.760343
Single_Model	215.033	-0.664339	0.241307	-2.75309	0.00590355		Anova	model.00	4	85.494	94.252	-38.747	77.494	model.01	5	79.114	90.062	-34.557	69.114	8.3797	1	0.003794	sig	6.8	nHILIC	[M+Cl]-	D-Glucose	HMDB0000122	C00031	1	NA
Single_Model	193.035	-0.653786	0.204913	-3.19055	0.00142003		Anova	model.00	4	85.494	94.252	-38.747	77.494	model.01	5	81.728	92.676	-35.864	71.728	5.7661	1	0.01634	sig	10.2	nHILIC	[M-H]-	D-Glucuronic acid	HMDB0000127	C00191	1	0.724393
Single_Model	105.019	-1.81629	0.576082	-3.15283	0.00161695		Anova	model.00	4	85.494	94.252	-38.747	77.494	model.01	5	73.681	84.63	-31.841	63.681	13.812	1	0.000202	sig	9.2	nHILIC	[M-H]-	Glyceric acid	HMDB0000139	C00258	2	0.817379
Single_Model	220.083	0.969553	0.291366	3.32762	0.00087592		Anova	model.00	4	85.494	94.252	-38.747	77.494	model.01	5	62.544	73.492	-26.272	52.544	24.95	1	5.88e-07	sig	6.8	nHILIC	[M-H]-	N-Acetylgalactosamine	HMDB0000212	C01074	3	NA
Single_Model	111.02	1.66129	0.600982	2.76428	0.0057048		Anova	model.00	4	85.494	94.252	-38.747	77.494	model.01	5	74.158	85.106	-32.079	64.158	13.336	1	0.0002604	sig	1.6	nHILIC	[M-H]-	Uracil	HMDB0000300	C00106	2	0.822996
Single_Model	487.213	-0.94594	0.361517	-2.61658	0.00888147		Anova	model.00	4	85.494	94.252	-38.747	77.494	model.01	5	79.418	90.366	-34.709	69.418	8.076	1	0.004486	sig	17.3	pHILIC	[M+H]+	Glucosylgalactosyl hydroxylysine	HMDB0000585	NA	1	0.85142
Single_Model	325.16	-1.36537	0.40439	-3.37637	0.0007345		Anova	model.00	4	85.494	94.252	-38.747	77.494	model.01	5	75.822	86.77	-32.911	65.822	11.672	1	0.0006346	sig	17.2	pHILIC	[M+H]+	Galactosylhydroxylysine	HMDB0000600	C05547	1	0.846064
Single_Model	279.232	0.838326	0.399451	2.0987	0.0358436		Anova	model.00	4	85.494	94.252	-38.747	77.494	model.01	5	82.648	93.596	-36.324	72.648	4.846	1	0.02771	sig	11.7	nRPLC	[M-H]-	C18:2 FA (Linoleic acid)	HMDB0000673	C01595	2	0.763545
Single_Model	212.002	-0.802051	0.340978	-2.35221	0.0186624		Anova	model.00	4	85.494	94.252	-38.747	77.494	model.01	5	79.544	90.492	-34.772	69.544	7.9498	1	0.004809	sig	3.4	nHILIC	[M-H]-	Indoxyl sulfate	HMDB0000682	NA	2	0.710855
Single_Model	178.051	-1.29528	0.346534	-3.73782	0.000185622		Anova	model.00	4	85.494	94.252	-38.747	77.494	model.01	5	72.878	83.827	-31.439	62.878	14.616	1	0.0001318	sig	5.1	nHILIC	[M-H]-	Hippuric acid	HMDB0000714	C01586	1	0.825407
Single_Model	181.051	-0.841604	0.418134	-2.01276	0.0441395		Anova	model.00	4	85.494	94.252	-38.747	77.494	model.01	5	82.91	93.858	-36.455	72.91	4.5842	1	0.03227	sig	6.3	nHILIC	[M-H]-	Hydroxyphenyllactic acid	HMDB0000755	C03672	1	NA
Single_Model	375.29	0.22495	0.0952431	2.36185	0.0181839		Anova	model.00	4	85.494	94.252	-38.747	77.494	model.01	5	82.382	93.33	-36.191	72.382	5.1123	1	0.02376	sig	11	nRPLC	[M-H]-	Lithocholic acid	HMDB0000761	C03990	2	0.760258
Single_Model	112.087	-1.12495	0.345382	-3.25711	0.00112553		Anova	model.00	4	85.494	94.252	-38.747	77.494	model.01	5	72.751	83.699	-31.375	62.751	14.743	1	0.0001232	sig	9.2	pHILIC	[M+H]+	Histamine	HMDB0000870	C00388	2	0.82798
Single_Model	189.088	1.23243	0.331323	3.71974	0.000199429		Anova	model.00	4	85.494	94.252	-38.747	77.494	model.01	5	74.671	85.62	-32.336	64.671	12.822	1	0.0003425	sig	9.1	nHILIC	[M+H]+	Diaminopimelic acid	HMDB0001370	C00666	2	NA
Single_Model	489.115	2.09565	0.634386	3.30344	0.000955073		Anova	model.00	4	85.494	94.252	-38.747	77.494	model.01	5	62.992	73.941	-26.496	52.992	24.502	1	7.43e-07	sig	11.9	pHILIC	[M+H]+	CDP-choline	HMDB0001413	C00307	2	0.820886
Single_Model	122.025	0.960234	0.33678	2.85122	0.00435514		Anova	model.00	4	85.494	94.252	-38.747	77.494	model.01	5	77.486	88.434	-33.743	67.486	10.008	1	0.001559	sig	5.6	nHILIC	[M-H]-	Picolinic acid	HMDB0002243	C10164	2	0.733707
Single_Model	237.055	0.858764	0.228483	3.75855	0.000170901		Anova	model.00	4	85.494	94.252	-38.747	77.494	model.01	5	71.965	82.913	-30.982	61.965	15.529	1	8.124e-05	sig	5.7	nHILIC	[M-H]-	Cystathionine sulfoxide	HMDB0002399	NA	3	NA
Single_Model	191.056	-0.683788	0.181833	-3.76053	0.000169552		Anova	model.00	4	85.494	94.252	-38.747	77.494	model.01	5	73.801	84.749	-31.901	63.801	13.693	1	0.0002153	sig	8.9	nHILIC	[M-H]-	Quinic acid	HMDB0003072	C00296	2	0.802419
Single_Model	146.118	-0.603361	0.157831	-3.82283	0.00013193		Anova	model.00	4	85.494	94.252	-38.747	77.494	model.01	5	70.576	81.525	-30.288	60.576	16.917	1	3.904e-05	sig	4.3	pHILIC	[M+H]+	3-Dehydroxycarnitine	HMDB0006831	C05543	2	0.683791
Single_Model	520.338	1.13571	0.466844	2.43273	0.0149854		Anova	model.00	4	85.494	94.252	-38.747	77.494	model.01	5	79.1	90.048	-34.55	69.1	8.3941	1	0.003764	sig	10.7	pRPLC	[M+H]+	LysoPC(18:2)	HMDB0010386	C04230	2	NA
Single_Model	452.276	0.955378	0.307845	3.10344	0.00191285		Anova	model.00	4	85.494	94.252	-38.747	77.494	model.01	5	72.471	83.42	-31.236	62.471	15.023	1	0.0001062	sig	10.5	pRPLC	[M+H]+	LysoPE(16:1)	HMDB0011474	NA	2	NA
Single_Model	480.307	0.768687	0.342058	2.24724	0.0246249		Anova	model.00	4	85.494	94.252	-38.747	77.494	model.01	5	80.995	91.943	-35.497	70.995	6.4989	1	0.01079	sig	11.1	pRPLC	[M+H]+	LysoPE(18:1)	HMDB0011475	NA	2	NA
Single_Model	504.308	1.04898	0.41992	2.49806	0.0124876		Anova	model.00	4	85.494	94.252	-38.747	77.494	model.01	5	79.968	90.917	-34.984	69.968	7.5255	1	0.006083	sig	11	pRPLC	[M+H]+	LysoPE(20:3)	HMDB0011484	NA	2	NA
Single_Model	335.074	1.49769	0.468075	3.19967	0.00137583		Anova	model.00	4	85.494	94.252	-38.747	77.494	model.01	5	73.455	84.404	-31.728	63.455	14.039	1	0.0001791	sig	10.8	pHILIC	[M+H]+	1-(sn-Glycero-3-phospho)-1D-myo-inositol	HMDB0011649	C01225	3	NA
Single_Model	151.061	1.37203	0.434715	3.15615	0.00159866		Anova	model.00	4	85.494	94.252	-38.747	77.494	model.01	5	80.653	91.601	-35.326	70.653	6.8409	1	0.008909	sig	1.6	pHILIC	[M+H]+	1-Methylhypoxanthine	HMDB0013141	NA	1	0.812622
Single_Model	255.134	0.326994	0.132138	2.47464	0.0133369		Anova	model.00	4	85.494	94.252	-38.747	77.494	model.01	5	81.288	92.237	-35.644	71.288	6.2054	1	0.01274	sig	12.4	pHILIC	[M+H]+	Midodrine	HMDB0014356	C07890	3	NA
Single_Model	579.27	-0.525496	0.256116	-2.05179	0.04019		Anova	model.00	4	85.494	94.252	-38.747	77.494	model.01	5	81.878	92.826	-35.939	71.878	5.6158	1	0.0178	sig	0.9	pHILIC	[M+H]+	Deserpidine	HMDB0015221	C06541	3	NA
Single_Model	415.143	0.757685	0.265598	2.85275	0.00433429		Anova	model.00	4	85.494	94.252	-38.747	77.494	model.01	5	75.666	86.614	-32.833	65.666	11.828	1	0.0005834	sig	10.5	pHILIC	[M+H]+	Flecainide	HMDB0015326	C07001	2	0.719865
Single_Model	227.114	1.31653	0.486408	2.70665	0.00679663		Anova	model.00	4	85.494	94.252	-38.747	77.494	model.01	5	78.226	89.174	-34.113	68.226	9.2682	1	0.002332	sig	10.8	pHILIC	[M+H]+	Ala-His	HMDB0028689	NA	2	0.716351
Single_Model	246.109	0.754665	0.225536	3.34609	0.000819598		Anova	model.00	4	85.494	94.252	-38.747	77.494	model.01	5	77.754	88.703	-33.877	67.754	9.7393	1	0.001804	sig	9.2	nHILIC	[M-H]-	Glutaminylthreonine	HMDB0028807	NA	3	NA
Single_Model	237.091	0.771186	0.186215	4.14137	3.45e-05		Anova	model.00	4	85.494	94.252	-38.747	77.494	model.01	5	58.374	69.322	-24.187	48.374	29.12	1	6.8e-08	sig	5.2	nHILIC	[M-H]-	Gly-Tyr	HMDB0028853	NA	2	0.721951
Single_Model	261.156	0.916248	0.341725	2.68125	0.00733482		Anova	model.00	4	85.494	94.252	-38.747	77.494	model.01	5	80.676	91.625	-35.338	70.676	6.8174	1	0.009027	sig	14.7	pHILIC	[M+H]+	Lys-Asn	HMDB0028946	NA	2	0.845228
Single_Model	295.129	0.534317	0.206798	2.58376	0.00977291		Anova	model.00	4	85.494	94.252	-38.747	77.494	model.01	5	79.765	90.713	-34.882	69.765	7.7292	1	0.005434	sig	8.8	pHILIC	[M+H]+	Phe-Glu	HMDB0028994	NA	2	0.77358
Single_Model	234.145	1.07325	0.312011	3.43977	0.0005822		Anova	model.00	4	85.494	94.252	-38.747	77.494	model.01	5	77.607	88.556	-33.804	67.607	9.8863	1	0.001665	sig	13	pHILIC	[M+H]+	Ser-Lys	HMDB0029044	NA	2	0.793272
Single_Model	207.097	1.16968	0.328067	3.56536	0.000363361		Anova	model.00	4	85.494	94.252	-38.747	77.494	model.01	5	72.836	83.784	-31.418	62.836	14.658	1	0.0001289	sig	9	pHILIC	[M+H]+	Ser-Thr	HMDB0029049	NA	2	0.728641
Single_Model	339.207	-1.21001	0.510374	-2.37083	0.0177483		Anova	model.00	4	85.494	94.252	-38.747	77.494	model.01	5	80.703	91.651	-35.352	70.703	6.7907	1	0.009163	sig	10.3	pRPLC	[M+H]+	Aspidospermatine	HMDB0030358	C09041	3	NA
Single_Model	298.101	-1.6008	0.396659	-4.0357	5.44e-05		Anova	model.00	4	85.494	94.252	-38.747	77.494	model.01	5	61.151	72.099	-25.576	51.151	26.343	1	2.86e-07	sig	11	pHILIC	[M+H]+	L-Menthone 1,2-glycerol ketal	HMDB0032367	NA	3	NA
Single_Model	211.039	0.640664	0.200462	3.19593	0.00139379		Anova	model.00	4	85.494	94.252	-38.747	77.494	model.01	5	76.624	87.572	-33.312	66.624	10.87	1	0.0009773	sig	8.7	nHILIC	[M-H]-	3-Hydroxyxanthone	HMDB0032997	NA	2	0.657605
Single_Model	95.0604	-0.94246	0.447859	-2.10437	0.0353464		Anova	model.00	4	85.494	94.252	-38.747	77.494	model.01	5	82.454	93.402	-36.227	72.454	5.0398	1	0.02477	sig	10.5	pHILIC	[M+H]+	3-Methylpyridazine	HMDB0033112	NA	2	0.825036
Single_Model	238.05	0.999738	0.249987	3.99916	6.36e-05		Anova	model.00	4	85.494	94.252	-38.747	77.494	model.01	5	60.876	71.824	-25.438	50.876	26.618	1	2.48e-07	sig	8.6	nHILIC	[M-H]-	Marcanine A	HMDB0033757	NA	3	NA
Single_Model	367.285	-0.395782	0.158791	-2.49247	0.0126859		Anova	model.00	4	85.494	94.252	-38.747	77.494	model.01	5	80.043	90.991	-35.021	70.043	7.4511	1	0.00634	sig	1.3	nHILIC	[M-H]-	Octadecyl fumarate	HMDB0038073	NA	3	NA
Single_Model	277.005	-1.26481	0.463042	-2.73152	0.00630427		Anova	model.00	4	85.494	94.252	-38.747	77.494	model.01	5	78.635	89.583	-34.318	68.635	8.8588	1	0.002917	sig	6.2	nHILIC	[M-H]-	Treosulfan	HMDB0042046	C19557	3	NA
Single_Model	201.026	-2.4144	0.655457	-3.68354	0.000230021		Anova	model.00	4	85.494	94.252	-38.747	77.494	model.01	5	50.657	61.605	-20.328	40.657	36.837	1	1.28e-09	sig	6.1	nHILIC	[M-H]-	5-hydroxy-2-oxo-4-ureido-2,5-dihydro-1H-imidazole-5-carboxylate	HMDB0059663	C12248	3	NA
Single_Model	460.167	-0.745378	0.189515	-3.93308	8.39e-05		Anova	model.00	4	85.494	94.252	-38.747	77.494	model.01	5	68.599	79.548	-29.3	58.599	18.894	1	1.382e-05	sig	9.2	nHILIC	[M-H]-	3-cis-Hydroxyglipizide	HMDB0060934	NA	3	NA
Single_Model	571.288	0.669526	0.194288	3.44605	0.000568843		Anova	model.00	4	85.494	94.252	-38.747	77.494	model.01	5	66.538	77.487	-28.269	56.538	20.956	1	4.701e-06	sig	13.2	nRPLC	[M-H]-	LPI(16:0)	HMDB0061695	NA	3	NA
Single_Model	152.002	1.89355	0.602633	3.14213	0.00167726		Anova	model.00	4	85.494	94.252	-38.747	77.494	model.01	5	70.498	81.446	-30.249	60.498	16.996	1	3.745e-05	sig	6.2	nHILIC	[M-H]-	Cysteine sulfinic acid	HMDB00996	C00606	2	0.78659
Single_Model	317.032	0.44555	0.19467	2.28875	0.0220942		Anova	model.00	4	85.494	94.252	-38.747	77.494	model.01	5	80.814	91.762	-35.407	70.814	6.6796	1	0.009752	sig	3.5	nRPLC	[M-H]-	{[3-(6,7-dimethoxy-2H-1,3-benzodioxol-5-yl)prop-2-en-1-yl]oxy}sulfonic acid	HMDB0128688	NA	3	NA
Single_Model	365.071	0.345262	0.170531	2.02463	0.0429049		Anova	model.00	4	85.494	94.252	-38.747	77.494	model.01	5	83.134	94.083	-36.567	73.134	4.3594	1	0.0368	sig	1.3	nRPLC	[M-H]-	(5,7-dihydroxy-6,8-dimethyl-2-phenyl-3,4-dihydro-2H-1-benzopyran-4-yl)oxidanesulfonic acid	HMDB0130599	NA	3	NA
Single_Model	233.056	-0.330755	0.0933648	-3.54262	0.00039618		Anova	model.00	4	85.494	94.252	-38.747	77.494	model.01	5	74.507	85.456	-32.254	64.507	12.986	1	0.0003138	sig	5.1	nRPLC	[M-H]-	2-{[hydroxy(5-hydroxy-1H-indol-3-yl)methylidene]amino}acetic acid	HMDB0134939	NA	3	NA
Single_Model	305.248	0.736973	0.311202	2.36815	0.0178773		Anova	model.00	4	85.494	94.252	-38.747	77.494	model.01	5	80.773	91.721	-35.387	70.773	6.7208	1	0.00953	sig	12.2	nRPLC	[M-H]-	C20:3 FA (Eicosatrienoic acid)	HMDB02925	C03242	2	NA
Single_Model	295.227	1.50149	0.589341	2.54774	0.0108425		Anova	model.00	4	85.494	94.252	-38.747	77.494	model.01	5	78.162	89.11	-34.081	68.162	9.3319	1	0.002252	sig	10.6	nRPLC	[M-H]-	C18:2,OH FA (Hydroxy-octadecadienoic acid)	HMDB04702	C14826	2	NA
Single_Model	307.264	0.774834	0.298975	2.59164	0.00955208		Anova	model.00	4	85.494	94.252	-38.747	77.494	model.01	5	81.115	92.063	-35.557	71.115	6.3792	1	0.01155	sig	13.1	nRPLC	[M-H]-	C20:2 FA (Eicosadienoic acid)	HMDB05060	C16525	2	NA
Single_Model	482.323	2.7095	0.871504	3.10899	0.00187728		Anova	model.00	4	85.494	94.252	-38.747	77.494	model.01	5	58.196	69.144	-24.098	48.196	29.298	1	6.21e-08	sig	10.6	pRPLC	[M+H]+	LysoPC(15:0)	HMDB10381	C04230	2	0.764132
Single_Model	319.227	0.420162	0.19288	2.17836	0.0293795		Anova	model.00	4	85.494	94.252	-38.747	77.494	model.01	5	81.947	92.895	-35.973	71.947	5.5471	1	0.01851	sig	10.3	nRPLC	[M-H]-	C20:4,OH FA (HETE)	HMDB11134	C04805	2	NA
Single_Model	438.297	1.31495	0.474219	2.77287	0.00555636		Anova	model.00	4	85.494	94.252	-38.747	77.494	model.01	5	74.204	85.152	-32.102	64.204	13.29	1	0.0002668	sig	11.2	pRPLC	[M+H]+	LysoPE(P-16:0)	HMDB11152	NA	2	NA
Single_Model	276.119	0.758908	0.238519	3.18175	0.00146387		Anova	model.00	4	85.494	94.252	-38.747	77.494	model.01	5	79.431	90.379	-34.716	69.431	8.0626	1	0.004519	sig	11.4	pHILIC	[M+H]+	Gamma-Glutamyl Glutamine	HMDB11738	C05283	1	0.860905
Single_Model	304.212	-0.581567	0.190533	-3.05231	0.00227085		Anova	model.00	4	85.494	94.252	-38.747	77.494	model.01	5	81.115	92.063	-35.558	71.115	6.3787	1	0.01155	sig	6.6	pHILIC	[M+H]+	C8:0,OH AC (Hydroxyoctanoyl carnitine)	HMDB61634	NA	2	0.782069
Single_Model	129.056	-1.06555	0.333861	-3.19161	0.00141483		Anova	model.00	4	85.494	94.252	-38.747	77.494	model.01	5	81.719	92.667	-35.859	71.719	5.7749	1	0.01626	sig	3	nRPLC	[M-H]-	4-Oxohexanoic acid	HMDB0010717	C02122	2	0.738892
Single_Model	422.268	0.832881	0.247714	3.36227	0.000773052		Anova	model.00	4	85.494	94.252	-38.747	77.494	model.01	5	64.136	75.085	-27.068	54.136	23.357	1	1.345e-06	sig	5.7	nHILIC	[M-H]-	PHOSPHONIC ACID 2-DODECANOYLAMINO-HEXYL ESTER PROPYL ESTER	NA	NA	3	NA
Single_Model	128.045	-0.32362	0.100141	-3.23163	0.00123084		Anova	model.00	4	85.494	94.252	-38.747	77.494	model.01	5	80.678	91.626	-35.339	70.678	6.8158	1	0.009035	sig	1.2	pHILIC	[M+H]+	5-Aminouracil	NA	NA	2	0.766148
Single_Model	95.0604	-1.16756	0.363681	-3.2104	0.00132549		Anova	model.00	4	85.494	94.252	-38.747	77.494	model.01	5	72.953	83.901	-31.476	62.953	14.541	1	0.0001371	sig	9.2	pHILIC	[M+H]+	4-Methylpyrimidine	NA	NA	2	0.806169
Single_Model	387.198	1.66258	0.558083	2.97909	0.0028911		Anova	model.00	4	85.494	94.252	-38.747	77.494	model.01	5	71.232	82.18	-30.616	61.232	16.262	1	5.515e-05	sig	13.5	pHILIC	[M+H]+	(5S)-5-(3-AMINOPROPYL)-3-(2,5-DIFLUOROPHENYL)-N-ETHYL-5-PHENYL-4,5-DIHYDRO-1H-PYRAZOLE-1-CARBOXAMIDE	NA	NA	3	NA
Single_Model	339.195	-0.540997	0.153376	-3.52726	0.000419882		Anova	model.00	4	85.494	94.252	-38.747	77.494	model.01	5	70.164	81.112	-30.082	60.164	17.33	1	3.142e-05	sig	1.4	pHILIC	[M+H]+	Cismethrin	NA	NA	3	NA
Single_Model	428.261	-0.235503	0.0766278	-3.07333	0.00211683		Anova	model.00	4	85.494	94.252	-38.747	77.494	model.01	5	82.979	93.927	-36.489	72.979	4.5153	1	0.03359	sig	10.3	pRPLC	[M+H]+	(2S,3R)-2-[[4-(Tert-butylcarbamoyl)piperazine-1-carbonyl]amino]-6-(diaminomethylideneamino)-3-formylhexanoic acid	NA	NA	3	NA
Single_Model	316.15	0.825537	0.281082	2.937	0.00331406		Anova	model.00	4	85.494	94.252	-38.747	77.494	model.01	5	71.354	82.302	-30.677	61.354	16.14	1	5.884e-05	sig	11.7	pHILIC	[M+H]+	Trofinetide	NA	NA	3	NA
Single_Model	340.177	-0.414926	0.186339	-2.22673	0.0259653		Anova	model.00	4	85.494	94.252	-38.747	77.494	model.01	5	81.976	92.924	-35.988	71.976	5.5182	1	0.01882	sig	6.6	pRPLC	[M+H]+	2,4-Diamino-6-[N-(2',5'-Dimethoxybenzyl)-N-Methylamino]Quinazoline	NA	NA	3	NA
Single_Model	370.052	0.818769	0.353853	2.31387	0.0206751		Anova	model.00	4	85.494	94.252	-38.747	77.494	model.01	5	79.373	90.322	-34.687	69.373	8.1205	1	0.004377	sig	10.6	pHILIC	[M+H]+	N-({[4-(AMINOSULFONYL)PHENYL]AMINO}CARBONYL)-4-METHYLBENZENESULFONAMIDE	NA	NA	3	NA
Single_Model	357.219	-0.758669	0.186682	-4.06397	4.82e-05		Anova	model.00	4	85.494	94.252	-38.747	77.494	model.01	5	62.902	73.851	-26.451	52.902	24.591	1	7.09e-07	sig	1.6	pHILIC	[M+H]+	3-Methyl-5-(7-{4-[(4R)-4-methyl-4,5-dihydro-1,3-oxazol-2-yl]phenoxy}heptyl)-1,2-oxazole	NA	NA	3	NA
Single_Model	330.861	-0.948295	0.316395	-2.99719	0.00272481		Anova	model.00	4	85.494	94.252	-38.747	77.494	model.01	5	76.866	87.814	-33.433	66.866	10.628	1	0.001114	sig	6	nHILIC	[M-H]-	3,8-DIBROMO-7-HYDROXY-4-METHYL-2H-CHROMEN-2-ONE	NA	NA	3	NA
Single_Model	336.06	0.744209	0.242423	3.06988	0.00214144		Anova	model.00	4	85.494	94.252	-38.747	77.494	model.01	5	73.758	84.706	-31.879	63.758	13.736	1	0.0002104	sig	8.4	nHILIC	[M-H]-	5-methylcytidine 5'-monophosphate	NA	NA	3	NA
Single_Model	516.273	0.767625	0.215687	3.55898	0.000372296		Anova	model.00	4	85.494	94.252	-38.747	77.494	model.01	5	64.399	75.348	-27.2	54.399	23.095	1	1.542e-06	sig	6	nHILIC	[M-H]-	Paspalitrem B	NA	NA	3	NA
Single_Model	190.051	0.448388	0.192878	2.32473	0.0200865		Anova	model.00	4	85.494	94.252	-38.747	77.494	model.01	5	81.847	92.795	-35.923	71.847	5.6469	1	0.01749	sig	3.9	nRPLC	[M-H]-	(2-oxo-2,3-dihydro-1H-indol-3-yl)acetic acid	NA	NA	2	0.746764
Single_Model	260.053	-0.723839	0.21066	-3.43605	0.000590253		Anova	model.00	4	85.494	94.252	-38.747	77.494	model.01	5	75.874	86.822	-32.937	65.874	11.62	1	0.0006524	sig	3.1	nRPLC	[M-H]-	2-Deoxy-2-Amino Glucitol-6-Phosphate	HMDB01504	C06605	3	NA
Single_Model	227.067	1.90344	0.4624	4.11642	3.85e-05		Anova	model.00	4	85.494	94.252	-38.747	77.494	model.01	5	53.896	64.844	-21.948	43.896	33.598	1	6.78e-09	sig	2	nHILIC	[M-H]-	Deoxyuridine	HMDB0000012	C00526	1	NA
Single_Model	328.045	-0.849843	0.2713	-3.13249	0.0017333		Anova	model.00	4	85.494	94.252	-38.747	77.494	model.01	5	82.035	92.984	-36.018	72.035	5.4583	1	0.01948	sig	2.9	nRPLC	[M-H]-	Adenosine 3',5'-cyclic monophosphate	HMDB0000058	C00575	2	0.743158
Single_Model	258.11	-0.628056	0.19705	-3.18729	0.00143614		Anova	model.00	4	85.494	94.252	-38.747	77.494	model.01	5	80.931	91.879	-35.465	70.931	6.563	1	0.01041	sig	10.7	pHILIC	[M+H]+	Glycerophosphocholine	HMDB0000086	C00670	1	0.862091
Single_Model	242.078	1.95182	0.611896	3.1898	0.00142373		Anova	model.00	4	85.494	94.252	-38.747	77.494	model.01	5	71.96	82.909	-30.98	61.96	15.534	1	8.105e-05	sig	6.1	nHILIC	[M-H]-	Cytidine	HMDB0000089	C02961	1	NA
Single_Model	131.046	-1.09385	0.402039	-2.72075	0.00651335		Anova	model.00	4	85.494	94.252	-38.747	77.494	model.01	5	76.726	87.674	-33.363	66.726	10.768	1	0.001033	sig	9.9	nHILIC	[M-H]-	L-Asparagine	HMDB0000168	C00152	1	NA
Single_Model	104.035	-0.864174	0.334035	-2.58708	0.00967943		Anova	model.00	4	85.494	94.252	-38.747	77.494	model.01	5	79.885	90.833	-34.942	69.885	7.609	1	0.005808	sig	10	nHILIC	[M-H]-	L-Serine	HMDB0000187	C00065	1	0.838859
Single_Model	239.016	-0.696289	0.276346	-2.51963	0.0117478		Anova	model.00	4	85.494	94.252	-38.747	77.494	model.01	5	79.549	90.497	-34.774	69.549	7.945	1	0.004822	sig	12.6	nHILIC	[M-H]-	L-Cystine	HMDB0000192	C00491	1	0.743956
Single_Model	124.007	1.04263	0.448667	2.32383	0.0201344		Anova	model.00	4	85.494	94.252	-38.747	77.494	model.01	5	79.341	90.289	-34.67	69.341	8.1531	1	0.004299	sig	8.9	nHILIC	[M-H]-	Taurine	HMDB0000251	C00245	1	0.87608
Single_Model	125.036	0.702902	0.251167	2.79855	0.00513324		Anova	model.00	4	85.494	94.252	-38.747	77.494	model.01	5	75.988	86.936	-32.994	65.988	11.506	1	0.0006938	sig	1.2	nHILIC	[M-H]-	Thymine	HMDB0000262	C00178	2	0.700873
Single_Model	323.028	0.80737	0.405245	1.9923	0.0463379		Anova	model.00	4	85.494	94.252	-38.747	77.494	model.01	5	81.841	92.789	-35.92	71.841	5.6532	1	0.01742	sig	10.9	nHILIC	[M-H]-	Uridine 5'-monophosphate	HMDB0000288	C00105	3	NA
Single_Model	143.035	-0.485147	0.218067	-2.22476	0.0260975		Anova	model.00	4	85.494	94.252	-38.747	77.494	model.01	5	81.859	92.807	-35.929	71.859	5.6349	1	0.01761	sig	3	nHILIC	[M-H]-	C6:1, DC FA (Hexenedioic acid)	HMDB0000393	NA	2	NA
Single_Model	170.092	1.0213	0.329735	3.09733	0.00195269		Anova	model.00	4	85.494	94.252	-38.747	77.494	model.01	5	82.313	93.261	-36.156	72.313	5.1811	1	0.02283	sig	10.5	pHILIC	[M+H]+	3-Methylhistidine	HMDB0000479	C01152	1	0.817822
Single_Model	112.051	1.4586	0.178068	8.19125	2.59e-16		Anova	model.00	4	85.494	94.252	-38.747	77.494	model.01	5	76.285	87.233	-33.142	66.285	11.209	1	0.0008139	sig	4.6	pHILIC	[M+H]+	Cytosine	HMDB0000630	C00380	1	0.827029
Single_Model	465.304	0.367014	0.148913	2.46461	0.0137161		Anova	model.00	4	85.494	94.252	-38.747	77.494	model.01	5	79.168	90.117	-34.584	69.168	8.3254	1	0.00391	sig	0.9	nHILIC	[M-H]-	Cholesterol sulfate	HMDB0000653	C18043	3	NA
Single_Model	132.065	-1.63209	0.501973	-3.25136	0.00114855		Anova	model.00	4	85.494	94.252	-38.747	77.494	model.01	5	72.291	83.239	-31.146	62.291	15.203	1	9.656e-05	sig	9	pHILIC	[M+H]+	4-HydroxyProline	HMDB0000725	C01157	1	0.797466
Single_Model	132.066	-1.10293	0.425911	-2.58956	0.00960975		Anova	model.00	4	85.494	94.252	-38.747	77.494	model.01	5	78.372	89.32	-34.186	68.372	9.1222	1	0.002525	sig	11.1	pHILIC	[M+H]+	N-Acetyl-L-alanine	HMDB0000766	NA	2	0.786245
Single_Model	380.119	-0.772153	0.333249	-2.31704	0.0205014		Anova	model.00	4	85.494	94.252	-38.747	77.494	model.01	5	79.759	90.708	-34.88	69.759	7.7346	1	0.005417	sig	1.4	nRPLC	[M-H]-	N-Acetyl-9-O-lactoylneuraminic acid	HMDB0000768	NA	3	NA
Single_Model	300.039	1.65764	0.548958	3.01961	0.00253096		Anova	model.00	4	85.494	94.252	-38.747	77.494	model.01	5	70.062	81.01	-30.031	60.062	17.432	1	2.978e-05	sig	8.6	nHILIC	[M-H]-	N-Acetyl-D-galactosamine 4-sulfate	HMDB0000781	C16265	2	0.652141
Single_Model	350.109	0.69786	0.334949	2.08348	0.0372073		Anova	model.00	4	85.494	94.252	-38.747	77.494	model.01	5	81.36	92.308	-35.68	71.36	6.134	1	0.01326	sig	8.3	nHILIC	[M-H]-	N-Acetyl-7-O-acetylneuraminic acid	HMDB0000785	C04016	3	NA
Single_Model	300.039	1.40279	0.565068	2.48252	0.0130458		Anova	model.00	4	85.494	94.252	-38.747	77.494	model.01	5	78.779	89.727	-34.389	68.779	8.7153	1	0.003156	sig	7.8	nHILIC	[M-H]-	N-Acetylglucosamine 6-sulfate	HMDB0000814	C04132	1	0.82732
Single_Model	202.144	1.87119	0.528508	3.54053	0.00039933		Anova	model.00	4	85.494	94.252	-38.747	77.494	model.01	5	75.809	86.758	-32.905	65.809	11.684	1	0.0006302	sig	10.2	pHILIC	[M+H]+	Capryloylglycine	HMDB0000832	NA	3	NA
Single_Model	146.118	1.30917	0.483216	2.70929	0.0067428		Anova	model.00	4	85.494	94.252	-38.747	77.494	model.01	5	77.497	88.446	-33.749	67.497	9.9965	1	0.001568	sig	11.1	pHILIC	[M+H]+	Acetylcholine	HMDB0000895	C01996	1	0.795916
Single_Model	166.072	1.64652	0.559851	2.941	0.00327157		Anova	model.00	4	85.494	94.252	-38.747	77.494	model.01	5	73.729	84.678	-31.865	63.729	13.764	1	0.0002072	sig	3.8	pHILIC	[M+H]+	7-Methylguanine	HMDB0000897	C02242	1	NA
Single_Model	303.083	-0.424511	0.195124	-2.1756	0.0295852		Anova	model.00	4	85.494	94.252	-38.747	77.494	model.01	5	82.024	92.972	-36.012	72.024	5.47	1	0.01935	sig	0.6	nRPLC	[M-H]-	N-Acetylaspartylglutamic acid	HMDB0001067	C12270	3	NA
Single_Model	189.16	1.04416	0.515182	2.02677	0.0426856		Anova	model.00	4	85.494	94.252	-38.747	77.494	model.01	5	82.88	93.828	-36.44	72.88	4.6136	1	0.03172	sig	18.3	pHILIC	[M+H]+	N6,N6,N6-Trimethyl-L-lysine	HMDB0001325	C03793	1	0.830722
Single_Model	317.212	0.469603	0.198807	2.36211	0.0181713		Anova	model.00	4	85.494	94.252	-38.747	77.494	model.01	5	81.024	91.973	-35.512	71.024	6.4694	1	0.01097	sig	0.9	nHILIC	[M-H]-	Leukotriene A4	HMDB0001337	C00909	3	NA
Single_Model	315.119	1.48786	0.431151	3.45091	0.000558709		Anova	model.00	4	85.494	94.252	-38.747	77.494	model.01	5	60.968	71.916	-25.484	50.968	26.526	1	2.6e-07	sig	7.8	pRPLC	[M+H]+	7,8-Dihydropteroic acid	HMDB0001412	C00921	3	NA
Single_Model	212.043	-0.793593	0.199363	-3.98064	6.87e-05		Anova	model.00	4	85.494	94.252	-38.747	77.494	model.01	5	67.961	78.909	-28.98	57.961	19.533	1	9.888e-06	sig	11.9	pHILIC	[M-H]-	Phosphocreatine	HMDB0001511	C02305	2	NA
Single_Model	404.026	0.352001	0.14605	2.41014	0.0159465		Anova	model.00	4	85.494	94.252	-38.747	77.494	model.01	5	80.505	91.453	-35.252	70.505	6.9889	1	0.008202	sig	0.9	pRPLC	[M+H]+	CDP	HMDB0001546	C00112	3	NA
Single_Model	296.1	0.364202	0.152091	2.39463	0.0166369		Anova	model.00	4	85.494	94.252	-38.747	77.494	model.01	5	80.763	91.711	-35.381	70.763	6.7313	1	0.009474	sig	4.9	nHILIC	[M-H]-	1-Methylguanosine	HMDB0001563	C04545	3	NA
Single_Model	87.045	0.543535	0.268637	2.02331	0.0430412		Anova	model.00	4	85.494	94.252	-38.747	77.494	model.01	5	83.28	94.229	-36.64	73.28	4.2136	1	0.0401	sig	2	nRPLC	[M-H]-	Isobutyric acid	HMDB0001873	C02632	2	0.791839
Single_Model	167.056	0.378913	0.147823	2.5633	0.0103684		Anova	model.00	4	85.494	94.252	-38.747	77.494	model.01	5	79.048	89.997	-34.524	69.048	8.4453	1	0.00366	sig	1.9	pHILIC	[M+H]+	7-Methylxanthine	HMDB0001991	C16353	2	0.710026
Single_Model	127.05	-1.48018	0.56921	-2.60042	0.00931107		Anova	model.00	4	85.494	94.252	-38.747	77.494	model.01	5	77.117	88.065	-33.558	67.117	10.377	1	0.001276	sig	9	pHILIC	[M+H]+	4-Imidazoleacetic acid	HMDB0002024	C02835	1	NA
Single_Model	86.06	-1.74512	0.457754	-3.81235	0.000137651		Anova	model.00	4	85.494	94.252	-38.747	77.494	model.01	5	67.495	78.443	-28.747	57.495	19.999	1	7.747e-06	sig	1.8	pHILIC	[M+H]+	2-Pyrrolidinone	HMDB0002039	C11118	3	NA
Single_Model	221.082	-0.536382	0.263748	-2.03369	0.0419829		Anova	model.00	4	85.494	94.252	-38.747	77.494	model.01	5	82.521	93.469	-36.26	72.521	4.9733	1	0.02574	sig	1.3	nHILIC	[M-H]-	Monoisobutyl phthalic acid	HMDB0002056	NA	3	NA
Single_Model	286.14	-1.43895	0.351894	-4.08915	4.33e-05		Anova	model.00	4	85.494	94.252	-38.747	77.494	model.01	5	56.123	67.071	-23.061	46.123	31.371	1	2.13e-08	sig	11.2	pHILIC	[M+H]+	Glycylprolylhydroxyproline	HMDB0002171	NA	3	NA
Single_Model	242.113	-0.540638	0.187144	-2.88888	0.00386613		Anova	model.00	4	85.494	94.252	-38.747	77.494	model.01	5	75.392	86.34	-32.696	65.392	12.102	1	0.0005038	sig	8.8	pHILIC	[M+H]+	5-Methyldeoxycytidine	HMDB0002224	C03592	3	NA
Single_Model	141.066	0.550634	0.272147	2.0233	0.0430427		Anova	model.00	4	85.494	94.252	-38.747	77.494	model.01	5	83.261	94.21	-36.631	73.261	4.2325	1	0.03966	sig	8.4	pHILIC	[M+H]+	Deamino-Histidine	HMDB0002271	C20522	1	0.824208
Single_Model	209.096	-0.790619	0.366728	-2.15587	0.0310935		Anova	model.00	4	85.494	94.252	-38.747	77.494	model.01	5	81.767	92.715	-35.884	71.767	5.7268	1	0.01671	sig	1.4	pRPLC	[M+H]+	Chalcone	HMDB0003066	C15589	3	NA
Single_Model	398.341	0.230101	0.116334	1.97793	0.047937		Anova	model.00	4	85.494	94.252	-38.747	77.494	model.01	5	83.348	94.296	-36.674	73.348	4.1461	1	0.04173	sig	1.8	pHILIC	[M+H]+	Solanidine	HMDB0003236	C06543	3	NA
Single_Model	273.08	-0.263901	0.0921906	-2.86256	0.00420235		Anova	model.00	4	85.494	94.252	-38.747	77.494	model.01	5	79.684	90.633	-34.842	69.684	7.8095	1	0.005197	sig	0.9	nHILIC	[M-H]-	Phloretin	HMDB0003306	C00774	2	0.740366
Single_Model	217.083	0.535671	0.188721	2.83842	0.00453376		Anova	model.00	4	85.494	94.252	-38.747	77.494	model.01	5	83.425	94.373	-36.712	73.425	4.0691	1	0.04367	sig	11.6	nHILIC	[M-H]-	Glutamylalanine	HMDB0003764	NA	3	NA
Single_Model	172.133	1.59958	0.40779	3.92255	8.76e-05		Anova	model.00	4	85.494	94.252	-38.747	77.494	model.01	5	69.218	80.166	-29.609	59.218	18.276	1	1.911e-05	sig	10.5	pHILIC	[M+H]+	Gabapentin	HMDB0005015	NA	2	0.791893
Single_Model	173.057	-0.957599	0.439238	-2.18014	0.0292473		Anova	model.00	4	85.494	94.252	-38.747	77.494	model.01	5	81.606	92.554	-35.803	71.606	5.8877	1	0.01525	sig	8.3	nHILIC	[M-H]-	N-Acetylasparagine	HMDB0006028	NA	1	NA
Single_Model	166.018	3.03868	0.793435	3.82978	0.000128258		Anova	model.00	4	85.494	94.252	-38.747	77.494	model.01	5	60.136	71.084	-25.068	50.136	27.358	1	1.69e-07	sig	5.7	nHILIC	[M-H]-	Homocysteinesulfinic acid	HMDB0006462	NA	1	0.826653
Single_Model	227.104	1.12823	0.469136	2.40491	0.0161766		Anova	model.00	4	85.494	94.252	-38.747	77.494	model.01	5	77.649	88.597	-33.824	67.649	9.845	1	0.001703	sig	6	nHILIC	[M-H]-	Prolylhydroxyproline	HMDB0006695	NA	3	NA
Single_Model	326.088	-0.383306	0.187958	-2.03932	0.0414185		Anova	model.00	4	85.494	94.252	-38.747	77.494	model.01	5	81.668	92.616	-35.834	71.668	5.826	1	0.01579	sig	8.1	nHILIC	[M-H]-	Acetaminophen glucuronide	HMDB0010316	NA	3	NA
Single_Model	468.307	0.801306	0.331398	2.41796	0.0156078		Anova	model.00	4	85.494	94.252	-38.747	77.494	model.01	5	80.06	91.008	-35.03	70.06	7.4342	1	0.0064	sig	10.2	pRPLC	[M+H]+	LysoPC(14:0)	HMDB0010379	C04230	2	NA
Single_Model	466.291	0.628582	0.1878	3.34708	0.000816671		Anova	model.00	4	85.494	94.252	-38.747	77.494	model.01	5	70.873	81.821	-30.436	60.873	16.621	1	4.564e-05	sig	10.8	pRPLC	[M+H]+	LysoPC(14:1)	HMDB0010380	C04230	2	NA
Single_Model	496.338	1.26675	0.487411	2.59893	0.00935154		Anova	model.00	4	85.494	94.252	-38.747	77.494	model.01	5	77.968	88.916	-33.984	67.968	9.5261	1	0.002026	sig	10.9	pRPLC	[M+H]+	LysoPC(16:0)	HMDB0010382	C04230	2	0.771599
Single_Model	498.262	0.57203	0.212349	2.69382	0.00706391		Anova	model.00	4	85.494	94.252	-38.747	77.494	model.01	5	77.438	88.386	-33.719	67.438	10.056	1	0.001519	sig	10.4	nRPLC	[M-H]-	LysoPE(20:5)	HMDB0011489	NA	2	NA
Single_Model	528.308	-1.13571	0.491022	-2.31295	0.0207254		Anova	model.00	4	85.494	94.252	-38.747	77.494	model.01	5	80.226	91.174	-35.113	70.226	7.2683	1	0.007018	sig	11.1	nRPLC	[M-H]-	LysoPE(22:4)	HMDB0011493	NA	2	NA
Single_Model	242.13	-0.371926	0.093838	-3.96349	7.39e-05		Anova	model.00	4	85.494	94.252	-38.747	77.494	model.01	5	72.147	83.095	-31.073	62.147	15.347	1	8.947e-05	sig	2	pHILIC	[M+H]+	Erythrohydrobupropion	HMDB0012227	NA	3	NA
Single_Model	365.135	-1.42197	0.397289	-3.57918	0.000344678		Anova	model.00	4	85.494	94.252	-38.747	77.494	model.01	5	75.686	86.634	-32.843	65.686	11.808	1	0.0005897	sig	9.1	nHILIC	[M-H]-	1-(1,2,3,4,5-Pentahydroxypent-1-yl)-1,2,3,4-tetrahydro-beta-carboline-3-carboxylate	HMDB0012492	NA	3	NA
Single_Model	508.375	0.56856	0.282334	2.01378	0.0440321		Anova	model.00	4	85.494	94.252	-38.747	77.494	model.01	5	82.659	93.607	-36.329	72.659	4.835	1	0.02789	sig	11.6	pRPLC	[M+H]+	LysoPC(P-18:0)	HMDB0013122	C04230	2	NA
Single_Model	279.17	0.843123	0.342081	2.46469	0.0137134		Anova	model.00	4	85.494	94.252	-38.747	77.494	model.01	5	79.063	90.012	-34.532	69.063	8.4304	1	0.00369	sig	4.5	pHILIC	[M+H]+	Leucyl-phenylalanine	HMDB0013243	C11221	3	NA
Single_Model	175.144	1.27808	0.599712	2.13116	0.0330761		Anova	model.00	4	85.494	94.252	-38.747	77.494	model.01	5	82.067	93.016	-36.034	72.067	5.4265	1	0.01983	sig	18.3	pHILIC	[M+H]+	Ne,Ne dimethyllysine	HMDB0013287	C05545	1	NA
Single_Model	251.103	1.52883	0.494508	3.09162	0.00199066		Anova	model.00	4	85.494	94.252	-38.747	77.494	model.01	5	73.898	84.846	-31.949	63.898	13.596	1	0.0002267	sig	6.1	nHILIC	[M-H]-	3'-Hydroxyhexobarbital	HMDB0013940	NA	3	NA
Single_Model	330.091	0.398374	0.186339	2.1379	0.0325248		Anova	model.00	4	85.494	94.252	-38.747	77.494	model.01	5	81.305	92.253	-35.652	71.305	6.1892	1	0.01285	sig	4.4	nHILIC	[M-H]-	5'-O-Desmethyl omeprazole	HMDB0014011	NA	3	NA
Single_Model	246.181	1.93968	0.613564	3.16132	0.00157053		Anova	model.00	4	85.494	94.252	-38.747	77.494	model.01	5	70.483	81.431	-30.242	60.483	17.011	1	3.717e-05	sig	16.9	pHILIC	[M+H-H2O]+	Tramadol	HMDB0014339	C07153	2	0.709981
Single_Model	217.119	2.08833	0.660223	3.16307	0.00156116		Anova	model.00	4	85.494	94.252	-38.747	77.494	model.01	5	70.659	81.608	-30.33	60.659	16.835	1	4.078e-05	sig	7	nHILIC	[M-H]-	Meprobamate	HMDB0014515	NA	3	NA
Single_Model	311.159	0.598084	0.223098	2.68082	0.00734419		Anova	model.00	4	85.494	94.252	-38.747	77.494	model.01	5	75.902	86.851	-32.951	65.902	11.591	1	0.0006626	sig	1.5	nRPLC	[M-H]-	Ethopropazine	HMDB0014536	NA	3	NA
Single_Model	180.034	1.58084	0.521056	3.03392	0.00241401		Anova	model.00	4	85.494	94.252	-38.747	77.494	model.01	5	73.772	84.72	-31.886	63.772	13.722	1	0.000212	sig	4.5	nHILIC	[M-H]-	Acamprosate	HMDB0014797	NA	2	0.823631
Single_Model	309.068	-0.365101	0.129401	-2.82146	0.00478054		Anova	model.00	4	85.494	94.252	-38.747	77.494	model.01	5	79.466	90.414	-34.733	69.466	8.0277	1	0.004607	sig	9.7	nHILIC	[M-H]-	Sulfadoxine	HMDB0015413	C07630	3	NA
Single_Model	299.045	0.302438	0.144322	2.09558	0.0361192		Anova	model.00	4	85.494	94.252	-38.747	77.494	model.01	5	82.016	92.964	-36.008	72.016	5.4781	1	0.01926	sig	2.5	nRPLC	[M-H]-	Tazobactam	HMDB0015544	C07771	3	NA
Single_Model	201.124	1.5513	0.502048	3.08994	0.00200198		Anova	model.00	4	85.494	94.252	-38.747	77.494	model.01	5	71.603	82.552	-30.802	61.603	15.89	1	6.712e-05	sig	6.1	nHILIC	[M-H]-	Alanyl-Isoleucine	HMDB0028690	NA	3	NA
Single_Model	304.161	-1.74972	0.656146	-2.66666	0.00766092		Anova	model.00	4	85.494	94.252	-38.747	77.494	model.01	5	79.254	90.203	-34.627	69.254	8.2396	1	0.004099	sig	13.1	pHILIC	[M+H]+	Arginyl-Glutamic acid	HMDB0028708	NA	3	NA
Single_Model	276.166	1.4067	0.614156	2.29046	0.0219944		Anova	model.00	4	85.494	94.252	-38.747	77.494	model.01	5	81.825	92.774	-35.913	71.825	5.6684	1	0.01727	sig	11.3	pHILIC	[M+H]+	Arginyl-Threonine	HMDB0028719	NA	3	NA
Single_Model	274.187	1.25236	0.626158	2.00007	0.0454931		Anova	model.00	4	85.494	94.252	-38.747	77.494	model.01	5	82.848	93.796	-36.424	72.848	4.646	1	0.03113	sig	10.5	pHILIC	[M+H]+	Arginyl-Valine	HMDB0028722	NA	3	NA
Single_Model	218.078	0.792423	0.241115	3.28649	0.00101444		Anova	model.00	4	85.494	94.252	-38.747	77.494	model.01	5	78.554	89.502	-34.277	68.554	8.94	1	0.00279	sig	10.1	nHILIC	[M-H]-	Asparaginyl-Serine	HMDB0028740	NA	3	NA
Single_Model	232.094	0.840358	0.396529	2.11928	0.0340664		Anova	model.00	4	85.494	94.252	-38.747	77.494	model.01	5	83.246	94.194	-36.623	73.246	4.2481	1	0.03929	sig	9.5	nHILIC	[M-H]-	Asparaginyl-Threonine	HMDB0028741	NA	3	NA
Single_Model	235.039	1.14226	0.295258	3.86869	0.000109422		Anova	model.00	4	85.494	94.252	-38.747	77.494	model.01	5	63.008	73.956	-26.504	53.008	24.486	1	7.49e-07	sig	7	nHILIC	[M-H]-	Aspartyl-Cysteine	HMDB0028750	NA	3	NA
Single_Model	275.171	1.76274	0.616594	2.85884	0.00425191		Anova	model.00	4	85.494	94.252	-38.747	77.494	model.01	5	78.867	89.815	-34.433	68.867	8.6269	1	0.003312	sig	13.2	pHILIC	[M+H]+	Glutaminyllysine	HMDB0028802	NA	3	NA
Single_Model	274.104	-0.567178	0.206019	-2.75303	0.00590459		Anova	model.00	4	85.494	94.252	-38.747	77.494	model.01	5	75.7	86.648	-32.85	65.7	11.794	1	0.0005943	sig	11	nHILIC	[M-H]-	Glu-Gln	HMDB0028817	NA	2	0.75535
Single_Model	255.145	2.30903	0.639889	3.60849	0.000307987		Anova	model.00	4	85.494	94.252	-38.747	77.494	model.01	5	69.037	79.986	-29.519	59.037	18.456	1	1.738e-05	sig	8.5	pHILIC	[M+H]+	His-Val	HMDB0028898	NA	2	0.711202
Single_Model	261.144	1.7692	0.500976	3.53151	0.000413188		Anova	model.00	4	85.494	94.252	-38.747	77.494	model.01	5	69.519	80.468	-29.76	59.519	17.974	1	2.239e-05	sig	9.7	pHILIC	[M+H]+	Ile-Glu	HMDB0028906	NA	2	0.772497
Single_Model	293.151	1.06977	0.381966	2.8007	0.00509912		Anova	model.00	4	85.494	94.252	-38.747	77.494	model.01	5	76.625	87.573	-33.313	66.625	10.869	1	0.0009781	sig	5.7	nHILIC	[M-H]-	Isoleucyl-Tyrosine	HMDB0028919	NA	3	NA
Single_Model	229.156	2.29769	0.664809	3.45617	0.000547911		Anova	model.00	4	85.494	94.252	-38.747	77.494	model.01	5	61.209	72.157	-25.604	51.209	26.285	1	2.95e-07	sig	4.9	nHILIC	[M-H]-	Ile-Val	HMDB0028920	NA	2	0.776207
Single_Model	262.14	0.975849	0.491906	1.98381	0.0472768		Anova	model.00	4	85.494	94.252	-38.747	77.494	model.01	5	82.858	93.806	-36.429	72.858	4.6362	1	0.0313	sig	14.1	pHILIC	[M+H]+	Lys-Asp	HMDB0028947	NA	2	0.835615
Single_Model	260.197	1.07031	0.436224	2.45358	0.0141441		Anova	model.00	4	85.494	94.252	-38.747	77.494	model.01	5	79.865	90.813	-34.932	69.865	7.6289	1	0.005744	sig	10.1	pHILIC	[M+H]+	Lys-Ile	HMDB0028954	NA	2	0.729651
Single_Model	265.119	1.36435	0.436473	3.12586	0.00177288		Anova	model.00	4	85.494	94.252	-38.747	77.494	model.01	5	73.929	84.878	-31.965	63.929	13.564	1	0.0002305	sig	5.5	nHILIC	[M-H]-	Phenylalanyl-Threonine	HMDB0029005	NA	3	NA
Single_Model	329.148	0.434624	0.188166	2.30979	0.0208996		Anova	model.00	4	85.494	94.252	-38.747	77.494	model.01	5	80.465	91.413	-35.232	70.465	7.0293	1	0.008019	sig	3.2	pRPLC	[M+H]+	Phenylalanyl-Tyrosine	HMDB0029007	NA	3	NA
Single_Model	231.135	2.25325	0.635671	3.54469	0.00039308		Anova	model.00	4	85.494	94.252	-38.747	77.494	model.01	5	62.936	73.884	-26.468	52.936	24.558	1	7.21e-07	sig	6.1	nHILIC	[M-H]-	Thr-Leu	HMDB0029065	NA	2	0.719176
Single_Model	317.125	0.638802	0.257779	2.4781	0.0132082		Anova	model.00	4	85.494	94.252	-38.747	77.494	model.01	5	79.702	90.65	-34.851	69.702	7.792	1	0.005248	sig	8.3	nHILIC	[M-H]-	Tyr-His	HMDB0029107	NA	2	0.694224
Single_Model	279.135	1.72161	0.505936	3.40281	0.000666958		Anova	model.00	4	85.494	94.252	-38.747	77.494	model.01	5	67.459	78.407	-28.729	57.459	20.035	1	7.604e-06	sig	5.8	nHILIC	[M-H]-	Tyrosyl-Valine	HMDB0029118	NA	3	NA
Single_Model	189.123	1.218	0.398843	3.05382	0.00225948		Anova	model.00	4	85.494	94.252	-38.747	77.494	model.01	5	75.716	86.664	-32.858	65.716	11.778	1	0.0005993	sig	6.9	pHILIC	[M+H]+	Val-Ala	HMDB0029120	NA	2	0.652203
Single_Model	231.17	2.28302	0.689367	3.31176	0.000927121		Anova	model.00	4	85.494	94.252	-38.747	77.494	model.01	5	67.71	78.658	-28.855	57.71	19.784	1	8.67e-06	sig	4.8	pHILIC	[M+H]+	Val-Ile	HMDB0029130	NA	2	0.78648
Single_Model	231.17	0.904696	0.347028	2.60698	0.00913441		Anova	model.00	4	85.494	94.252	-38.747	77.494	model.01	5	77.698	88.646	-33.849	67.698	9.7962	1	0.001749	sig	1.5	pRPLC	[M+H]+	Val-Leu	HMDB0029131	NA	2	0.818419
Single_Model	283.101	0.56589	0.172103	3.28809	0.0010087		Anova	model.00	4	85.494	94.252	-38.747	77.494	model.01	5	79.699	90.648	-34.85	69.699	7.7945	1	0.005241	sig	10.2	pHILIC	[M+H]+	Arabinopyranobiose	HMDB0029619	NA	3	NA
Single_Model	207.102	-1.68853	0.551542	-3.06148	0.00220248		Anova	model.00	4	85.494	94.252	-38.747	77.494	model.01	5	81.959	92.907	-35.979	71.959	5.5348	1	0.01864	sig	7.4	nRPLC	[M-H]-	Isoelemicin	HMDB0029867	C16975	3	NA
Single_Model	206.049	-1.02358	0.419743	-2.43859	0.0147446		Anova	model.00	4	85.494	94.252	-38.747	77.494	model.01	5	77.534	88.482	-33.767	67.534	9.9601	1	0.0016	sig	7.7	nHILIC	[M-H]-	(2R,2'S)-Isobuteine	HMDB0030411	NA	3	NA
Single_Model	203.143	-0.578319	0.227184	-2.5456	0.0109089		Anova	model.00	4	85.494	94.252	-38.747	77.494	model.01	5	78.688	89.636	-34.344	68.688	8.8061	1	0.003002	sig	10	pRPLC	[M+H]+	(±)-Anisoxide	HMDB0030572	NA	3	NA
Single_Model	325.107	1.57481	0.418897	3.75942	0.000170305		Anova	model.00	4	85.494	94.252	-38.747	77.494	model.01	5	64.794	75.743	-27.397	54.794	22.699	1	1.894e-06	sig	6.2	nHILIC	[M-H]-	1,5-Dihydroxy-3-methoxy-2-prenylxanthone	HMDB0030605	NA	3	NA
Single_Model	289.18	-0.398914	0.161557	-2.46919	0.013542		Anova	model.00	4	85.494	94.252	-38.747	77.494	model.01	5	80.838	91.786	-35.419	70.838	6.6561	1	0.009882	sig	10.4	nRPLC	[M-H]-	(9Z,11E,13E,15Z)-4-Oxo-9,11,13,15-octadecatetraenoic acid	HMDB0031098	NA	3	NA
Single_Model	319.153	-0.742448	0.248387	-2.98907	0.00279826		Anova	model.00	4	85.494	94.252	-38.747	77.494	model.01	5	74.12	85.068	-32.06	64.12	13.374	1	0.0002552	sig	7.8	pRPLC	[M+H]+	(S,E)-Zearalenone	HMDB0031752	C09981	3	NA
Single_Model	263.165	-0.911383	0.325182	-2.80268	0.00506794		Anova	model.00	4	85.494	94.252	-38.747	77.494	model.01	5	75.588	86.537	-32.794	65.588	11.905	1	0.0005597	sig	8.7	nRPLC	[M-H]-	12-Oxo-2,3-dinor-10,15-phytodienoic acid	HMDB0032090	NA	3	NA
Single_Model	209.19	-2.64474	0.872247	-3.0321	0.0024286		Anova	model.00	4	85.494	94.252	-38.747	77.494	model.01	5	70.712	81.661	-30.356	60.712	16.781	1	4.194e-05	sig	9.7	pRPLC	[M+H]+	2-Decylfuran	HMDB0032215	NA	3	NA
Single_Model	341.305	0.3994	0.149006	2.68044	0.00735256		Anova	model.00	4	85.494	94.252	-38.747	77.494	model.01	5	79.196	90.144	-34.598	69.196	8.2979	1	0.003969	sig	6.6	pHILIC	[M+H]+	Polyoxyethylene (600) monoricinoleate	HMDB0032476	NA	3	NA
Single_Model	223.076	1.39206	0.369316	3.76929	0.000163714		Anova	model.00	4	85.494	94.252	-38.747	77.494	model.01	5	48.919	59.867	-19.459	38.919	38.575	1	5.27e-10	sig	6.1	nHILIC	[M-H]-	4-Hydroxychalcone	HMDB0032584	C14231	3	NA
Single_Model	225.055	0.637251	0.179693	3.54634	0.000390628		Anova	model.00	4	85.494	94.252	-38.747	77.494	model.01	5	73.489	84.438	-31.745	63.489	14.005	1	0.0001824	sig	7.9	nHILIC	[M-H]-	2-Methoxyxanthone	HMDB0032998	NA	3	NA
Single_Model	239.06	-0.656779	0.300304	-2.18705	0.0287391		Anova	model.00	4	85.494	94.252	-38.747	77.494	model.01	5	81.585	92.533	-35.792	71.585	5.9091	1	0.01506	sig	10.9	nRPLC	[M-H]-	Propyl 1-(propylsulfinyl)propyl disulfide	HMDB0033071	NA	3	NA
Single_Model	347.146	2.58982	0.827735	3.12881	0.00175518		Anova	model.00	4	85.494	94.252	-38.747	77.494	model.01	5	70.983	81.931	-30.491	60.983	16.511	1	4.836e-05	sig	7.8	pRPLC	[M+H]+	Mytilin B	HMDB0033442	NA	3	NA
Single_Model	379.223	-0.491881	0.241262	-2.03878	0.0414721		Anova	model.00	4	85.494	94.252	-38.747	77.494	model.01	5	82.602	93.55	-36.301	72.602	4.892	1	0.02698	sig	10.7	pRPLC	[M+H]+	Neotame	HMDB0034566	NA	2	0.747734
Single_Model	329.197	-0.535462	0.156069	-3.43093	0.000601507		Anova	model.00	4	85.494	94.252	-38.747	77.494	model.01	5	71.447	82.395	-30.723	61.447	16.047	1	6.178e-05	sig	12.4	pHILIC	[M+H]+	8-O-Methyloblongine	HMDB0034579	NA	3	NA
Single_Model	273.257	-0.397235	0.189755	-2.09341	0.0363124		Anova	model.00	4	85.494	94.252	-38.747	77.494	model.01	5	81.48	92.428	-35.74	71.48	6.0139	1	0.01419	sig	11.6	pRPLC	[M+H]+	ent-16-Kaurene	HMDB0035394	NA	3	NA
Single_Model	103.04	-1.17736	0.451024	-2.61041	0.00904341		Anova	model.00	4	85.494	94.252	-38.747	77.494	model.01	5	79.711	90.66	-34.856	69.711	7.7825	1	0.005276	sig	6.2	nHILIC	[M-H]-	C4:1 FA (Hydroxybutyric acid)	HMDB00357	C01089	2	NA
Single_Model	571.289	1.97563	0.488022	4.04823	5.16e-05		Anova	model.00	4	85.494	94.252	-38.747	77.494	model.01	5	54.677	65.626	-22.339	44.677	32.816	1	1.01e-08	sig	6.7	nHILIC	[M-H]-	Ganoderic acid H	HMDB0035987	NA	3	NA
Single_Model	491.266	-0.556998	0.271422	-2.05214	0.0401556		Anova	model.00	4	85.494	94.252	-38.747	77.494	model.01	5	82.25	93.198	-36.125	72.25	5.2441	1	0.02202	sig	11.5	nRPLC	[M-H]-	Erinacine P	HMDB0036313	NA	3	NA
Single_Model	193.068	0.275422	0.137362	2.00508	0.0449547		Anova	model.00	4	85.494	94.252	-38.747	77.494	model.01	5	83.294	94.242	-36.647	73.294	4.1998	1	0.04043	sig	1.5	pRPLC	[M+H]+	2-(Methylthiomethyl)-3-phenyl-2-propenal	HMDB0037166	NA	3	NA
Single_Model	207.088	-0.231535	0.110095	-2.10304	0.0354622		Anova	model.00	4	85.494	94.252	-38.747	77.494	model.01	5	82.219	93.168	-36.11	72.219	5.2743	1	0.02164	sig	1.2	pHILIC	[M+H]+	2,4,6-Triethyl-1,3,5-oxadithiane	HMDB0038791	NA	3	NA
Single_Model	309.077	-0.369587	0.102508	-3.60545	0.000311618		Anova	model.00	4	85.494	94.252	-38.747	77.494	model.01	5	77.322	88.27	-33.661	67.322	10.172	1	0.001426	sig	5.1	nRPLC	[M-H]-	6,11-Dihydroxy-2,2-dimethylpyrano[3,2-c]xanthen-7(2H)-one	HMDB0040357	NA	3	NA
Single_Model	266.113	0.41839	0.196474	2.12949	0.0332134		Anova	model.00	4	85.494	94.252	-38.747	77.494	model.01	5	81.934	92.882	-35.967	71.934	5.5596	1	0.01838	sig	7.8	pHILIC	[M+H]+	Agaritinal	HMDB0040694	NA	3	NA
Single_Model	289.05	0.343997	0.165155	2.08288	0.0372626		Anova	model.00	4	85.494	94.252	-38.747	77.494	model.01	5	82.115	93.063	-36.057	72.115	5.3793	1	0.02038	sig	8.8	nHILIC	[M-H]-	2-(4-Hydroxyphenyl)naphthalic anhydride	HMDB0041121	NA	3	NA
Single_Model	304.097	0.420442	0.180901	2.32416	0.0201171		Anova	model.00	4	85.494	94.252	-38.747	77.494	model.01	5	81.047	91.996	-35.524	71.047	6.4466	1	0.01112	sig	6.9	nHILIC	[M-H]-	N-Acetyldehydroanonaine	HMDB0041537	NA	3	NA
Single_Model	437.087	0.685198	0.294277	2.32841	0.0198901		Anova	model.00	4	85.494	94.252	-38.747	77.494	model.01	5	81.147	92.095	-35.574	71.147	6.3468	1	0.01176	sig	5.2	nRPLC	[M-H]-	Riboflavin cyclic-4',5'-phosphate	HMDB0059614	C16071	3	NA
Single_Model	207.149	-0.434904	0.144452	-3.01072	0.00260627		Anova	model.00	4	85.494	94.252	-38.747	77.494	model.01	5	82.199	93.147	-36.099	72.199	5.295	1	0.02139	sig	1.5	pHILIC	[M+H]+	Norlidocaine	HMDB0060432	C16551	2	0.726386
Single_Model	341.208	0.463162	0.187856	2.46551	0.0136817		Anova	model.00	4	85.494	94.252	-38.747	77.494	model.01	5	80.526	91.474	-35.263	70.526	6.9678	1	0.008299	sig	10.6	pRPLC	[M+H]+	Perindoprilat	HMDB0060574	NA	3	NA
Single_Model	368.077	0.289577	0.128816	2.24798	0.0245774		Anova	model.00	4	85.494	94.252	-38.747	77.494	model.01	5	81.94	92.888	-35.97	71.94	5.5541	1	0.01844	sig	0.6	nRPLC	[M-H]-	6-Hydroxy-R-acenocoumarol	HMDB0060882	NA	3	NA
Single_Model	353.16	-0.431311	0.134666	-3.20283	0.00136085		Anova	model.00	4	85.494	94.252	-38.747	77.494	model.01	5	73.834	84.782	-31.917	63.834	13.66	1	0.000219	sig	7.8	nRPLC	[M-H]-	Propofol .beta.-D-glucuronide	HMDB0060933	NA	2	0.824598
Single_Model	352.072	0.331724	0.157521	2.1059	0.0352133		Anova	model.00	4	85.494	94.252	-38.747	77.494	model.01	5	82.992	93.94	-36.496	72.992	4.5017	1	0.03386	sig	5.9	nHILIC	[M-H]-	lansoprazole sulfide	HMDB0061003	NA	3	NA
Single_Model	423.252	0.524415	0.241471	2.17175	0.0298747		Anova	model.00	4	85.494	94.252	-38.747	77.494	model.01	5	81.669	92.617	-35.834	71.669	5.8253	1	0.0158	sig	2	nHILIC	[M-H]-	1-heptadecanoyl-glycero-3-phosphate	HMDB0062318	NA	3	NA
Single_Model	448.342	-0.238187	0.0948032	-2.51244	0.0119901		Anova	model.00	4	85.494	94.252	-38.747	77.494	model.01	5	80.031	90.979	-35.015	70.031	7.463	1	0.006298	sig	4.3	pHILIC	[M+H]+	N-Stearoyl tyrosine	HMDB0062343	NA	3	NA
Single_Model	386.325	0.722985	0.246521	2.93276	0.00335968		Anova	model.00	4	85.494	94.252	-38.747	77.494	model.01	5	71.827	82.775	-30.913	61.827	15.667	1	7.553e-05	sig	9.8	pRPLC	[M+H]+	Pentadecanoylcarnitine	HMDB0062517	NA	3	NA
Single_Model	257.078	1.02304	0.378498	2.7029	0.00687375		Anova	model.00	4	85.494	94.252	-38.747	77.494	model.01	5	73.314	84.262	-31.657	63.314	14.18	1	0.0001661	sig	2.8	nHILIC	[M-H]-	5-methyluridine (ribothymidine)	HMDB00884	NA	1	NA
Single_Model	367.158	-0.461673	0.162797	-2.83588	0.00456991		Anova	model.00	4	85.494	94.252	-38.747	77.494	model.01	5	81.159	92.107	-35.579	71.159	6.3353	1	0.01184	sig	9.4	nRPLC	[M-H]-	Dehydroisoandrosterone sulfate (DHEA-S)	HMDB01032	C04555	2	NA
Single_Model	347.113	-0.382601	0.16454	-2.32528	0.0200571		Anova	model.00	4	85.494	94.252	-38.747	77.494	model.01	5	78.27	89.218	-34.135	68.27	9.2243	1	0.002388	sig	6	nHILIC	[M-H]-	1-(2,4,6-trihydroxyphenyl)-3-(3,4,5-trimethoxyphenyl)propan-1-one	HMDB0124870	NA	3	NA
Single_Model	211.025	-0.579184	0.267518	-2.16503	0.0303852		Anova	model.00	4	85.494	94.252	-38.747	77.494	model.01	5	79.696	90.644	-34.848	69.696	7.7978	1	0.005231	sig	8.9	nHILIC	[M-H]-	2-oxo-3-(3,4,5-trihydroxyphenyl)propanoic acid	HMDB0125210	NA	3	NA
Single_Model	421.066	-0.305374	0.152648	-2.00051	0.0454448		Anova	model.00	4	85.494	94.252	-38.747	77.494	model.01	5	82.315	93.263	-36.157	72.315	5.1788	1	0.02286	sig	10.7	nHILIC	[M-H]-	{[3,4-dihydroxy-5-(hydroxymethyl)-2-{[3,4,5-trihydroxy-6-(hydroxymethyl)oxan-2-yl]oxy}oxolan-2-yl]methoxy}sulfonic acid	HMDB0125625	NA	3	NA
Single_Model	431.079	-0.663568	0.258679	-2.56522	0.0103111		Anova	model.00	4	85.494	94.252	-38.747	77.494	model.01	5	77.577	88.525	-33.789	67.577	9.9168	1	0.001638	sig	1	nRPLC	[M-H]-	{2-hydroxy-5-[3-(5-methoxy-2,2-dimethyl-2H-chromen-6-yl)prop-2-enoyl]phenyl}oxidanesulfonic acid	HMDB0125863	NA	3	NA
Single_Model	563.138	-1.33871	0.497135	-2.69285	0.0070845		Anova	model.00	4	85.494	94.252	-38.747	77.494	model.01	5	74.947	85.895	-32.473	64.947	12.547	1	0.0003969	sig	5.6	pHILIC	[M+H]+	3,4,5-trihydroxy-6-{[7-hydroxy-4-oxo-2-phenyl-8-(3,4,5-trihydroxyoxan-2-yl)-4H-chromen-5-yl]oxy}oxane-2-carboxylic acid	HMDB0127263	NA	3	NA
Single_Model	246.042	-1.83338	0.542282	-3.38087	0.000722577		Anova	model.00	4	85.494	94.252	-38.747	77.494	model.01	5	60.432	71.381	-25.216	50.432	27.061	1	1.97e-07	sig	9.7	nHILIC	[M-H]-	2-{[hydroxy(1-oxo-1H-isochromen-3-yl)methylidene]amino}acetic acid	HMDB0128628	NA	3	NA
Single_Model	485.072	-0.853634	0.274428	-3.1106	0.00186707		Anova	model.00	4	85.494	94.252	-38.747	77.494	model.01	5	77.538	88.487	-33.769	67.538	9.9556	1	0.001604	sig	8.5	nHILIC	[M-H]-	3,4,5-trihydroxy-6-({11-hydroxy-13-oxo-6,8,20-trioxapentacyclo[10.8.0.0²,<U+2079>.0³,7.0¹4,¹<U+2079>]icosa-1(12),2(9),4,10,14(19),15,17-heptaen-15-yl}oxy)oxane-2-carboxylic acid	HMDB0128870	NA	3	NA
Single_Model	353.067	-0.402655	0.12992	-3.09926	0.00194006		Anova	model.00	4	85.494	94.252	-38.747	77.494	model.01	5	81.278	92.226	-35.639	71.278	6.2162	1	0.01266	sig	3.9	nRPLC	[M-H]-	17-hydroxy-11,15-dimethoxy-6,8,20-trioxapentacyclo[10.8.0.0²,<U+2079>.0³,7.0¹4,¹<U+2079>]icosa-1(12),2(9),4,10,14,16,18-heptaen-13-one	HMDB0128873	NA	3	NA
Single_Model	275.078	1.04469	0.462299	2.25977	0.0238357		Anova	model.00	4	85.494	94.252	-38.747	77.494	model.01	5	80.396	91.345	-35.198	70.396	7.0974	1	0.007719	sig	7	nHILIC	[M-H]-	3,4,5-trihydroxy-6-[(3-methylbut-2-enoyl)oxy]oxane-2-carboxylic acid	HMDB0128920	NA	3	NA
Single_Model	369.155	-0.587429	0.159621	-3.68016	0.000233092		Anova	model.00	4	85.494	94.252	-38.747	77.494	model.01	5	68.04	78.988	-29.02	58.04	19.454	1	1.03e-05	sig	5.6	nHILIC	[M-H]-	3,4,5-trihydroxy-6-{[1-(4-methoxyphenyl)pentan-3-yl]oxy}oxane-2-carboxylic acid	HMDB0133009	NA	3	NA
Single_Model	225.186	-0.474507	0.228153	-2.07978	0.0375456		Anova	model.00	4	85.494	94.252	-38.747	77.494	model.01	5	82.675	93.624	-36.338	72.675	4.8184	1	0.02816	sig	10.7	nRPLC	[M-H]-	C14:1 FA (Myristoleic acid)	HMDB02000	C08322	2	NA
Single_Model	262.104	1.53137	0.452912	3.38117	0.00072179		Anova	model.00	4	85.494	94.252	-38.747	77.494	model.01	5	67.871	78.82	-28.936	57.871	19.622	1	9.435e-06	sig	9.6	nHILIC	[M-H]-	Creatine riboside	HMDB0240254	NA	3	NA
Single_Model	599.321	0.562422	0.199694	2.81642	0.00485624		Anova	model.00	4	85.494	94.252	-38.747	77.494	model.01	5	78.182	89.13	-34.091	68.182	9.3118	1	0.002277	sig	6.6	nHILIC	[M-H]-	LysoPI(18:0)	HMDB0240262	NA	2	NA
Single_Model	224.062	-1.39348	0.384628	-3.62294	0.000291272		Anova	model.00	4	85.494	94.252	-38.747	77.494	model.01	5	65.792	76.741	-27.896	55.792	21.701	1	3.185e-06	sig	4.9	nHILIC	[M-H]-	Androstenediol (3beta,17beta) disulfate	HMDB03818	C04295	2	0.828042
Single_Model	227.14	0.620449	0.187414	3.31057	0.000931049		Anova	model.00	4	85.494	94.252	-38.747	77.494	model.01	5	79.359	90.307	-34.679	69.359	8.1349	1	0.004342	sig	6.1	nHILIC	[M-H]-	Ile-Pro	HMDB11174	NA	2	0.677543
Single_Model	315.254	-0.472545	0.212465	-2.2241	0.0261415		Anova	model.00	4	85.494	94.252	-38.747	77.494	model.01	5	81.835	92.783	-35.918	71.835	5.6588	1	0.01737	sig	9.5	nRPLC	[M-H]-	MG(15:0)	HMDB11532	NA	2	NA
Single_Model	172.098	1.09136	0.524423	2.08107	0.0374276		Anova	model.00	4	85.494	94.252	-38.747	77.494	model.01	5	82.742	93.69	-36.371	72.742	4.7517	1	0.02927	sig	3.7	nRPLC	[M-H]-	N-Acetylleucine|N-Acetylisoleucine	HMDB11756|HMDB61684	|C02710	1	NA
Single_Model	510.354	0.647978	0.131471	4.92869	8.28e-07		Anova	model.00	4	85.494	94.252	-38.747	77.494	model.01	5	78.097	89.045	-34.048	68.097	9.3969	1	0.002174	sig	11.3	pRPLC	[M+H]+	LysoPC(17:0)	HMDB12108	C04230	2	0.771952
Single_Model	276.144	-0.747334	0.366746	-2.03774	0.0415758		Anova	model.00	4	85.494	94.252	-38.747	77.494	model.01	5	82.843	93.791	-36.422	72.843	4.6506	1	0.03104	sig	11.3	pHILIC	[M+H]+	C5:0, DC AC (Glutarylcarnitine)	HMDB13130	NA	2	NA
Single_Model	295.264	0.792259	0.309557	2.55933	0.0104873		Anova	model.00	4	85.494	94.252	-38.747	77.494	model.01	5	79.162	90.111	-34.581	69.162	8.3313	1	0.003897	sig	13.4	nRPLC	[M-H]-	C19:1 FA (Nonadecaenoic acid)	HMDB13622	C00174	2	NA
Single_Model	290.159	-0.562384	0.260429	-2.15946	0.0308148		Anova	model.00	4	85.494	94.252	-38.747	77.494	model.01	5	82.85	93.799	-36.425	72.85	4.6435	1	0.03117	sig	11.1	pHILIC	[M+H]+	C6:0,DC AC (Adipoylcarnitine)	HMDB61677	NA	2	NA
Single_Model	619.288	0.443716	0.177095	2.50552	0.012227		Anova	model.00	4	85.494	94.252	-38.747	77.494	model.01	5	78.791	89.739	-34.395	68.791	8.703	1	0.003177	sig	12.8	nRPLC	[M-H]-	LysoPI(20:4)	HMDB61690	NA	2	NA
Single_Model	597.304	0.346549	0.163707	2.11688	0.0342697		Anova	model.00	4	85.494	94.252	-38.747	77.494	model.01	5	82.39	93.338	-36.195	72.39	5.1041	1	0.02387	sig	13.6	nRPLC	[M-H]-	LysoPI(18:1)	HMDB61693	NA	2	NA
Single_Model	103.04	-1.00587	0.371116	-2.71038	0.0067206		Anova	model.00	4	85.494	94.252	-38.747	77.494	model.01	5	84.692	95.64	-37.346	74.692	2.802	1	0.09415	nsig	5.4	nHILIC	[M-H]-	C4:1 FA (Hydroxyisobutyric acid)	HMDB0000008	C05984	2	0.830985
Single_Model	129.066	-0.801077	0.282493	-2.83574	0.0045719		Anova	model.00	4	85.494	94.252	-38.747	77.494	model.01	5	84.975	95.924	-37.488	74.975	2.5183	1	0.1125	nsig	9.5	pHILIC	[M+H]+	Dihydrothymine	HMDB0000079	C00906	1	NA
Single_Model	283.068	0.0289115	0.197911	0.146083	0.883856		Anova	model.00	4	85.494	94.252	-38.747	77.494	model.01	5	87.473	98.421	-38.736	77.473	0.0213	1	0.8839	nsig	8.2	nHILIC	[M-H]-	Xanthosine	HMDB0000299	C01762	2	0.776074
Single_Model	85.0295	-0.21812	0.34816	-0.626492	0.530992		Anova	model.00	4	85.494	94.252	-38.747	77.494	model.01	5	87.096	98.044	-38.548	77.096	0.3979	1	0.5282	nsig	2.3	nHILIC	[M-H]-	Gamma-Butyrolactone	HMDB0000549	C01770	3	NA
Single_Model	279.098	0.659246	0.629204	1.04775	0.294756		Anova	model.00	4	85.494	94.252	-38.747	77.494	model.01	5	86.421	97.369	-38.211	76.421	1.0728	1	0.3003	nsig	2.7	nRPLC	[M-H]-	Aspartylphenylalanine	HMDB0000706	NA	3	NA
Single_Model	414.3	0.291838	0.203362	1.43507	0.151268		Anova	model.00	4	85.494	94.252	-38.747	77.494	model.01	5	85.175	96.124	-37.588	75.175	2.3184	1	0.1278	nsig	5.2	pHILIC	[M+H-2H2O]+	Glycoursodeoxycholic acid	HMDB0000708	NA	2	0.708677
Single_Model	260.185	-0.326957	0.379095	-0.862465	0.388432		Anova	model.00	4	85.494	94.252	-38.747	77.494	model.01	5	86.563	97.511	-38.281	76.563	0.9308	1	0.3346	nsig	6.2	pHILIC	[M+H]+	C6:0 AC (Hexanoylcarnitine)	HMDB0000756	NA	2	0.815385
Single_Model	130.05	0.174597	0.311895	0.559794	0.57562		Anova	model.00	4	85.494	94.252	-38.747	77.494	model.01	5	87.177	98.125	-38.588	77.177	0.3169	1	0.5735	nsig	9.7	pHILIC	[M+H]+	D-Pyroglutamic acid	HMDB0000805	C02237	2	0.828074
Single_Model	664.116	0.266386	0.208808	1.27575	0.202045		Anova	model.00	4	85.494	94.252	-38.747	77.494	model.01	5	85.799	96.747	-37.899	75.799	1.6949	1	0.193	nsig	10.6	pHILIC	[M+H]+	NAD	HMDB0000902	C00003	1	0.789516
Single_Model	382.1	0.473633	0.35908	1.31902	0.187163		Anova	model.00	4	85.494	94.252	-38.747	77.494	model.01	5	83.615	94.563	-36.807	73.615	3.8793	1	0.04889	nsig	10.3	nHILIC	[M-H]-	Succinyladenosine	HMDB0000912	NA	3	NA
Single_Model	383.114	0.21093	0.22208	0.949791	0.342219		Anova	model.00	4	85.494	94.252	-38.747	77.494	model.01	5	86.472	97.42	-38.236	76.472	1.0217	1	0.3121	nsig	9.1	nHILIC	[M-H]-	S-Adenosyl-homocysteine	HMDB0000939	C00021	2	0.751085
Single_Model	569.313	-0.480952	0.284013	-1.69342	0.0903763		Anova	model.00	4	85.494	94.252	-38.747	77.494	model.01	5	84.723	95.672	-37.362	74.723	2.7706	1	0.09601	nsig	6.2	pRPLC	[M+H]+	Protoporphyrinogen IX	HMDB0001097	C01079	3	NA
Single_Model	458.178	0.150832	0.110018	1.37098	0.170381		Anova	model.00	4	85.494	94.252	-38.747	77.494	model.01	5	85.496	96.444	-37.748	75.496	1.9982	1	0.1575	nsig	7.1	pRPLC	[M+H]+	5,10-Methylene-THF	HMDB0001533	C00143	3	NA
Single_Model	327.232	0.415664	0.247025	1.68268	0.0924372		Anova	model.00	4	85.494	94.252	-38.747	77.494	model.01	5	84.338	95.286	-37.169	74.338	3.1562	1	0.07564	nsig	11.7	nRPLC	[M-H]-	C22:6 FA (Docosahexaenoic acid)	HMDB0002183	C06429	2	0.809893
Single_Model	331.264	0.202423	0.261972	0.772687	0.439707		Anova	model.00	4	85.494	94.252	-38.747	77.494	model.01	5	86.9	97.848	-38.45	76.9	0.5938	1	0.4409	nsig	12.8	nRPLC	[M-H]-	C22:4 FA (Docosatetraenoic acid)	HMDB0002226	C16527	2	0.82157
Single_Model	353.141	-0.349516	0.239924	-1.45678	0.145178		Anova	model.00	4	85.494	94.252	-38.747	77.494	model.01	5	85.036	95.984	-37.518	75.036	2.458	1	0.1169	nsig	3.2	pRPLC	[M+H]+	Estradiol-17beta 3-sulfate	HMDB0004448	C08357	3	NA
Single_Model	85.066	0.0941213	0.26392	0.356628	0.72137		Anova	model.00	4	85.494	94.252	-38.747	77.494	model.01	5	87.369	98.317	-38.684	77.369	0.1253	1	0.7234	nsig	3.2	nHILIC	[M-H]-	Iso-Valeraldehyde	HMDB0006478	C07329	3	NA
Single_Model	417.241	0.416564	0.236418	1.76198	0.0780718		Anova	model.00	4	85.494	94.252	-38.747	77.494	model.01	5	84.844	95.792	-37.422	74.844	2.6501	1	0.1035	nsig	1.2	nHILIC	[M-H]-	CPA(18:1(11Z)/0:0)	HMDB0007005	NA	3	NA
Single_Model	415.225	0.192628	0.181002	1.06423	0.287225		Anova	model.00	4	85.494	94.252	-38.747	77.494	model.01	5	86.45	97.398	-38.225	76.45	1.0437	1	0.307	nsig	1.3	nHILIC	[M-H]-	CPA(18:2(9Z,12Z)/0:0)	HMDB0007007	NA	3	NA
Single_Model	548.37	0.138853	0.162565	0.854139	0.393028		Anova	model.00	4	85.494	94.252	-38.747	77.494	model.01	5	86.748	97.696	-38.374	76.748	0.7461	1	0.3877	nsig	11.4	pRPLC	[M+H]+	LysoPC(20:2)	HMDB0010392	C04230	2	NA
Single_Model	187.006	-0.456177	0.313718	-1.4541	0.145919		Anova	model.00	4	85.494	94.252	-38.747	77.494	model.01	5	84.38	95.328	-37.19	74.38	3.1142	1	0.07761	nsig	4.5	nRPLC	[M-H]-	p-Cresol sulfate	HMDB0011635	NA	2	NA
Single_Model	192.066	0.827345	0.439805	1.88116	0.0599498		Anova	model.00	4	85.494	94.252	-38.747	77.494	model.01	5	82.959	93.908	-36.48	72.959	4.5346	1	0.03322	nsig	3.9	nRPLC	[M-H]-	2-Methylhippuric acid	HMDB0011723	C01586	2	0.679
Single_Model	309.207	0.333358	0.221723	1.50349	0.132713		Anova	model.00	4	85.494	94.252	-38.747	77.494	model.01	5	85.069	96.018	-37.535	75.069	2.4244	1	0.1195	nsig	9.6	nRPLC	[M-H]-	C18:2,DC FA (Octadecadienedicarboxylic acid)	HMDB0013623	NA	2	NA
Single_Model	494.269	-0.231811	0.137136	-1.69037	0.0909579		Anova	model.00	4	85.494	94.252	-38.747	77.494	model.01	5	84.894	95.843	-37.447	74.894	2.5994	1	0.1069	nsig	7.7	pRPLC	[M+H]+	Imatinib	HMDB0014757	NA	2	0.682197
Single_Model	437.234	-0.457761	0.318447	-1.43748	0.150582		Anova	model.00	4	85.494	94.252	-38.747	77.494	model.01	5	85.455	96.403	-37.727	75.455	2.039	1	0.1533	nsig	5.3	pRPLC	[M+H]+	Flurandrenolide	HMDB0014984	NA	3	NA
Single_Model	290.146	-0.654772	0.535256	-1.22329	0.221222		Anova	model.00	4	85.494	94.252	-38.747	77.494	model.01	5	86.017	96.965	-38.008	76.017	1.477	1	0.2242	nsig	12.8	pHILIC	[M+H]+	Aspartyl-Arginine	HMDB0028747	NA	2	NA
Single_Model	260.089	0.145383	0.181904	0.799229	0.424157		Anova	model.00	4	85.494	94.252	-38.747	77.494	model.01	5	86.865	97.814	-38.433	76.865	0.6283	1	0.428	nsig	11.4	nHILIC	[M-H]-	Gln-Asp	HMDB0028793	NA	2	0.718177
Single_Model	243.135	-0.463672	0.251009	-1.84723	0.0647135		Anova	model.00	4	85.494	94.252	-38.747	77.494	model.01	5	84.067	95.016	-37.034	74.067	3.4263	1	0.06416	nsig	5.5	nHILIC	[M-H]-	Hydroxyprolyl-Isoleucine	HMDB0028866	NA	3	NA
Single_Model	241.094	0.10067	0.219088	0.459496	0.645878		Anova	model.00	4	85.494	94.252	-38.747	77.494	model.01	5	87.278	98.226	-38.639	77.278	0.216	1	0.6421	nsig	10.2	nHILIC	[M-H]-	Histidylserine	HMDB0028894	NA	2	0.786513
Single_Model	246.146	0.461138	0.243448	1.8942	0.0581984		Anova	model.00	4	85.494	94.252	-38.747	77.494	model.01	5	83.359	94.307	-36.68	73.359	4.1348	1	0.04201	nsig	13.3	nHILIC	[M-H]-	Lysyl-Threonine	HMDB0028961	NA	3	NA
Single_Model	310.176	0.357283	0.380814	0.938208	0.348137		Anova	model.00	4	85.494	94.252	-38.747	77.494	model.01	5	86.593	97.541	-38.296	76.593	0.901	1	0.3425	nsig	11.3	pHILIC	[M+H]+	Lysyl-Tyrosine	HMDB0028963	NA	3	NA
Single_Model	205.083	0.0673795	0.196951	0.342112	0.732267		Anova	model.00	4	85.494	94.252	-38.747	77.494	model.01	5	87.374	98.322	-38.687	77.374	0.1202	1	0.7288	nsig	9	nHILIC	[M-H]-	Thr-Ser	HMDB0029070	NA	2	0.783677
Single_Model	339.089	-0.312418	0.223231	-1.39953	0.161655		Anova	model.00	4	85.494	94.252	-38.747	77.494	model.01	5	85.296	96.245	-37.648	75.296	2.1974	1	0.1382	nsig	4.6	nHILIC	[M-H]-	Dihydro-O-methylsterigmatocystin	HMDB0030591	NA	3	NA
Single_Model	767.461	-0.256959	0.127501	-2.01536	0.0438672		Anova	model.00	4	85.494	94.252	-38.747	77.494	model.01	5	84.169	95.117	-37.084	74.169	3.3249	1	0.06824	nsig	10.3	pRPLC	[M+H]+	Pitheduloside A	HMDB0031357	NA	3	NA
Single_Model	231.087	-0.28081	0.245398	-1.14431	0.252497		Anova	model.00	4	85.494	94.252	-38.747	77.494	model.01	5	86.146	97.095	-38.073	76.146	1.3473	1	0.2457	nsig	8.2	nHILIC	[M-H]-	Glycerol 1-propanoate diacetate	HMDB0031640	NA	3	NA
Single_Model	109.076	0.226739	0.201074	1.12764	0.259472		Anova	model.00	4	85.494	94.252	-38.747	77.494	model.01	5	86.267	97.216	-38.134	76.267	1.2265	1	0.2681	nsig	7.3	pHILIC	[M+H]+	2-Ethylpyrazine	HMDB0031849	NA	2	0.791795
Single_Model	247.119	0.336749	0.256879	1.31092	0.189883		Anova	model.00	4	85.494	94.252	-38.747	77.494	model.01	5	85.639	96.587	-37.819	75.639	1.8551	1	0.1732	nsig	3.7	nHILIC	[M-H]-	Prenyl glucoside	HMDB0031876	C09808	3	NA
Single_Model	198.087	0.0942459	0.194366	0.484889	0.627755		Anova	model.00	4	85.494	94.252	-38.747	77.494	model.01	5	87.252	98.2	-38.626	77.252	0.2417	1	0.6229	nsig	8.3	pHILIC	[M+H]+	N-Acetylhistidine	HMDB0032055	C02997	1	0.850234
Single_Model	233.067	-0.204543	0.189029	-1.08207	0.27922		Anova	model.00	4	85.494	94.252	-38.747	77.494	model.01	5	86.235	97.183	-38.117	76.235	1.2593	1	0.2618	nsig	5.6	nHILIC	[M-H]-	1-Isopropyl citrate	HMDB0032438	NA	3	NA
Single_Model	519.224	-0.290883	0.248636	-1.16992	0.242035		Anova	model.00	4	85.494	94.252	-38.747	77.494	model.01	5	85.95	96.898	-37.975	75.95	1.5441	1	0.214	nsig	11.7	nRPLC	[M-H]-	Myricanol 5-glucoside	HMDB0036525	NA	3	NA
Single_Model	202.072	0.505581	0.196635	2.57117	0.0101356		Anova	model.00	4	85.494	94.252	-38.747	77.494	model.01	5	85.732	96.68	-37.866	75.732	1.7618	1	0.1844	nsig	8	nHILIC	[M-H]-	1-Isothiocyanato-7-(methylthio)heptane	HMDB0038440	NA	3	NA
Single_Model	293.117	0.25893	0.212834	1.21658	0.223763		Anova	model.00	4	85.494	94.252	-38.747	77.494	model.01	5	86.096	97.044	-38.048	76.096	1.3983	1	0.237	nsig	11.2	pHILIC	[M+H]+	N-gamma-Glutamyl-S-propylcysteine	HMDB0039096	NA	3	NA
Single_Model	662.101	0.416708	0.24821	1.67885	0.0931812		Anova	model.00	4	85.494	94.252	-38.747	77.494	model.01	5	84.188	95.136	-37.094	74.188	3.3057	1	0.06904	nsig	1.2	nRPLC	[M-H]-	Fenugreekine	HMDB0039421	NA	3	NA
Single_Model	117.056	-0.346338	0.417593	-0.829367	0.406897		Anova	model.00	4	85.494	94.252	-38.747	77.494	model.01	5	86.732	97.681	-38.366	76.732	0.7615	1	0.3829	nsig	4.1	nHILIC	[M-H]-	alpha-Hydroxyisovaleric acid|beta-Hydroxyisovalerate	HMDB00407|HMDB00754	NA	2	NA
Single_Model	148.991	-0.376437	0.680125	-0.553482	0.579933		Anova	model.00	4	85.494	94.252	-38.747	77.494	model.01	5	87.185	98.134	-38.593	77.185	0.3086	1	0.5786	nsig	6.8	nHILIC	[M-H]-	Thiodiacetic acid	HMDB0042032	C14872	3	NA
Single_Model	251.201	0.0375012	0.14236	0.263426	0.792223		Anova	model.00	4	85.494	94.252	-38.747	77.494	model.01	5	87.425	98.373	-38.713	77.425	0.0686	1	0.7934	nsig	10.9	nRPLC	[M-H]-	C16:2 FA (Hexadecadienoic acid)	HMDB00477	NA	2	NA
Single_Model	275.075	0.34595	0.184191	1.87821	0.0603518		Anova	model.00	4	85.494	94.252	-38.747	77.494	model.01	5	83.198	94.146	-36.599	73.198	4.2958	1	0.03821	nsig	4.1	pHILIC	[M+H]+	modafinil acid	HMDB0061039	NA	3	NA
Single_Model	414.299	-0.239481	0.161723	-1.48081	0.138658		Anova	model.00	4	85.494	94.252	-38.747	77.494	model.01	5	84.988	95.936	-37.494	74.988	2.506	1	0.1134	nsig	9.9	pRPLC	[M+H]+	N-Docosahexaenoyl GABA	HMDB0062332	NA	3	NA
Single_Model	488.235	0.153432	0.116854	1.31302	0.189176		Anova	model.00	4	85.494	94.252	-38.747	77.494	model.01	5	85.678	96.626	-37.839	75.678	1.8163	1	0.1778	nsig	11	pHILIC	[M+H]+	Ac-Ser-Asp-Lys-Pro-OH	HMDB0062552	NA	3	NA
Single_Model	187.097	-0.584208	0.504298	-1.15846	0.246677		Anova	model.00	4	85.494	94.252	-38.747	77.494	model.01	5	86.105	97.053	-38.053	76.105	1.3886	1	0.2386	nsig	4.5	nRPLC	[M-H]-	C9:0,DC FA (Azelaic acid)	HMDB00784	C08261	2	NA
Single_Model	323.022	-0.257792	0.212499	-1.21314	0.225076		Anova	model.00	4	85.494	94.252	-38.747	77.494	model.01	5	85.895	96.844	-37.948	75.895	1.5985	1	0.2061	nsig	8.4	nHILIC	[M-H]-	{4-[(E)-2-(2,3,5-trihydroxyphenyl)ethenyl]phenyl}oxidanesulfonic acid	HMDB0128516	NA	3	NA
Single_Model	293.051	0.292402	0.3131	0.933894	0.350359		Anova	model.00	4	85.494	94.252	-38.747	77.494	model.01	5	86.608	97.557	-38.304	76.608	0.8855	1	0.3467	nsig	3.8	nHILIC	[M-H]-	3,4,5-trihydroxy-6-[(3-methoxy-3-oxopropanoyl)oxy]oxane-2-carboxylic acid	HMDB0130026	NA	3	NA
Single_Model	256.081	0.156346	0.147694	1.05858	0.289792		Anova	model.00	4	85.494	94.252	-38.747	77.494	model.01	5	86.349	97.297	-38.174	76.349	1.1451	1	0.2846	nsig	8.1	pHILIC	[M+H]+	2-{[hydroxy(4-hydroxy-3,5-dimethoxyphenyl)methylidene]amino}acetic acid	HMDB0131458	NA	3	NA
Single_Model	329.248	0.256375	0.25957	0.987691	0.323304		Anova	model.00	4	85.494	94.252	-38.747	77.494	model.01	5	86.497	97.445	-38.248	76.497	0.9973	1	0.318	nsig	12.1	nRPLC	[M-H]-	C22:5 FA (Docosapentaenoic acid)	HMDB06528	C16513	2	NA
Single_Model	293.212	0.478324	0.291188	1.64267	0.100452		Anova	model.00	4	85.494	94.252	-38.747	77.494	model.01	5	84.446	95.394	-37.223	74.446	3.0482	1	0.08083	nsig	10.2	nRPLC	[M-H]-	C18:3,OH FA (Hydroxylinolenic acid)	HMDB11108	NA	2	0.688238
Single_Model	261.144	0.3043	0.231446	1.31478	0.188584		Anova	model.00	4	85.494	94.252	-38.747	77.494	model.01	5	85.729	96.677	-37.865	75.729	1.7646	1	0.184	nsig	2.4	pRPLC	[M+H]+	gamma-glutamyl-L-isoleucine |gamma-glutamyl-L-leucine	HMDB11170|HMDB11171	NA	1	NA
Single_Model	393.208	-0.538697	0.33304	-1.61751	0.105767		Anova	model.00	4	85.494	94.252	-38.747	77.494	model.01	5	84.847	95.795	-37.423	74.847	2.6471	1	0.1037	nsig	4.9	pRPLC	[M+H]+	(S)-N-(1-Amino-3-methyl-1-oxobutan-2-yl)-1-(5-fluoropentyl)-3-(4-fluorophenyl)-1H-pyrazole-5-carboxamide	METPA0001	NA	2	0.77262
Single_Model	284.053	0.149376	0.145282	1.02818	0.303864		Anova	model.00	4	85.494	94.252	-38.747	77.494	model.01	5	86.44	97.389	-38.22	76.44	1.0534	1	0.3047	nsig	11.3	pHILIC	[M+H]+	Fosthiazate	NA	C18402	3	NA
Single_Model	362.221	-0.211964	0.118365	-1.79077	0.0733307		Anova	model.00	4	85.494	94.252	-38.747	77.494	model.01	5	84.79	95.738	-37.395	74.79	2.7037	1	0.1001	nsig	10.3	pRPLC	[M+H]+	Prenoxdiazine	NA	NA	3	NA
Single_Model	596.268	-0.442642	0.267017	-1.65773	0.0973713		Anova	model.00	4	85.494	94.252	-38.747	77.494	model.01	5	84.478	95.426	-37.239	74.478	3.0163	1	0.08243	nsig	1.2	pHILIC	[M+H]+	GLPG-0187	NA	NA	3	NA
Single_Model	373.171	0.0265618	0.132444	0.200551	0.841049		Anova	model.00	4	85.494	94.252	-38.747	77.494	model.01	5	87.454	98.403	-38.727	77.454	0.0395	1	0.8425	nsig	11.1	pHILIC	[M+H]+	1,1,1-TRIFLUORO-3-((N-ACETYL)-L-LEUCYLAMIDO)-4-PHENYL-BUTAN-2-ONE(N-ACETYL-L-LEUCYL-L-PHENYLALANYL TRIFLUOROMETHYL KETONE)	NA	NA	3	NA
Single_Model	398.116	-0.155856	0.211192	-0.737984	0.460524		Anova	model.00	4	85.494	94.252	-38.747	77.494	model.01	5	86.909	97.857	-38.454	76.909	0.5852	1	0.4443	nsig	3.3	pRPLC	[M+H]+	Rivoglitazone	NA	NA	3	NA
Single_Model	349.182	-0.514773	0.343882	-1.49695	0.134407		Anova	model.00	4	85.494	94.252	-38.747	77.494	model.01	5	85.201	96.15	-37.601	75.201	2.2926	1	0.13	nsig	4.5	pRPLC	[M+H]+	Efinaconazole	NA	NA	3	NA
Single_Model	361.233	-0.0586395	0.121113	-0.48417	0.628265		Anova	model.00	4	85.494	94.252	-38.747	77.494	model.01	5	87.255	98.203	-38.627	77.255	0.2389	1	0.625	nsig	10.2	pRPLC	[M+H]+	4-[[(2S)-2-[[(2S)-3-Carboxy-2-hydroxypropanoyl]amino]-4-methylpentanoyl]amino]butyl-(diaminomethylidene)azanium	NA	NA	3	NA
Single_Model	120.102	0.30405	0.302162	1.00625	0.314297		Anova	model.00	4	85.494	94.252	-38.747	77.494	model.01	5	86.483	97.431	-38.241	76.483	1.011	1	0.3147	nsig	7.4	pHILIC	[M+H]+	Ammonium isovalerate	NA	NA	3	NA
Single_Model	324.036	0.203472	0.108633	1.87303	0.0610647		Anova	model.00	4	85.494	94.252	-38.747	77.494	model.01	5	83.591	94.539	-36.795	73.591	3.9031	1	0.0482	nsig	11	nHILIC	[M-H]-	Flumetsulam	NA	C18852	3	NA
Single_Model	313.119	-0.41828	0.224907	-1.85979	0.0629152		Anova	model.00	4	85.494	94.252	-38.747	77.494	model.01	5	82.436	93.384	-36.218	72.436	5.0582	1	0.02451	nsig	4.1	nHILIC	[M-H]-	2-HYDROXY-5-{[(1E)-2-PHENYLETHYLIDENE]AMINO}-L-TYROSINE	NA	NA	3	NA
Single_Model	321.03	0.10329	0.0859027	1.20241	0.229205		Anova	model.00	4	85.494	94.252	-38.747	77.494	model.01	5	85.993	96.941	-37.996	75.993	1.5008	1	0.2205	nsig	3.5	nRPLC	[M-H]-	Sodium sulfate decahydrate	NA	NA	3	NA
Single_Model	112.937	0.124964	0.132328	0.944353	0.344989		Anova	model.00	4	85.494	94.252	-38.747	77.494	model.01	5	86.605	97.554	-38.303	76.605	0.8886	1	0.3459	nsig	11.4	nHILIC	[M-H]-	Thiosulfic acid	NA	HMDB00257	1	0.818181
Single_Model	420.036	-0.368927	0.226714	-1.62728	0.103678		Anova	model.00	4	85.494	94.252	-38.747	77.494	model.01	5	84.009	94.958	-37.005	74.009	3.4845	1	0.06195	nsig	0.9	nRPLC	[M-H]-	Flumetralin	NA	C18849	3	NA
Single_Model	218.103	0.256423	0.431317	0.594512	0.552169		Anova	model.00	4	85.494	94.252	-38.747	77.494	model.01	5	87.129	98.078	-38.565	77.129	0.3645	1	0.546	nsig	6.8	nHILIC	[M-H]-	Pantothenic acid (Vitamin B5)	HMDB00210	C00864	1	0.823024
Single_Model	124.991	-0.44441	0.379556	-1.17087	0.241652		Anova	model.00	4	85.494	94.252	-38.747	77.494	model.01	5	86.108	97.057	-38.054	76.108	1.3856	1	0.2392	nsig	6.3	nHILIC	[M-H]-	2-Hydroxyethanesulfonate	HMDB03903	C05123	1	0.761099
Single_Model	170.092	0.137311	0.324455	0.423205	0.672145		Anova	model.00	4	85.494	94.252	-38.747	77.494	model.01	5	87.311	98.26	-38.656	77.311	0.1824	1	0.6693	nsig	9.1	pHILIC	[M+H]+	1-Methylhistidine	HMDB0000001	C01152	1	0.812422
Single_Model	228.098	-0.00465243	0.191753	-0.0242626	0.980643		Anova	model.00	4	85.494	94.252	-38.747	77.494	model.01	5	87.493	98.442	-38.747	77.493	0.0006	1	0.9806	nsig	8.7	pHILIC	[M+H]+	Deoxycytidine	HMDB0000014	C00881	3	NA
Single_Model	131.046	0.186671	0.190943	0.977626	0.328259		Anova	model.00	4	85.494	94.252	-38.747	77.494	model.01	5	86.475	97.423	-38.238	76.475	1.0187	1	0.3128	nsig	10.7	nHILIC	[M-H]-	3-Ureidopropionic acid	HMDB0000026	C02642	2	0.678332
Single_Model	514.283	-0.349823	0.215962	-1.61983	0.105269		Anova	model.00	4	85.494	94.252	-38.747	77.494	model.01	5	84.267	95.216	-37.134	74.267	3.2265	1	0.07245	nsig	9.9	nRPLC	[M-H]-	Taurocholic acid	HMDB0000036	C05122	2	0.804005
Single_Model	175.025	0.0344751	0.19948	0.172825	0.862789		Anova	model.00	4	85.494	94.252	-38.747	77.494	model.01	5	87.465	98.413	-38.732	77.465	0.0293	1	0.8642	nsig	11.2	nHILIC	[M-H]-	Ascorbic acid	HMDB0000044	C01041	2	NA
Single_Model	346.056	0.131515	0.1147	1.14659	0.25155		Anova	model.00	4	85.494	94.252	-38.747	77.494	model.01	5	86.09	97.038	-38.045	76.09	1.4041	1	0.236	nsig	10.6	nHILIC	[M-H]-	AMP	HMDB0000045	C00020	3	NA
Single_Model	341.109	-0.18281	0.111301	-1.64248	0.100491		Anova	model.00	4	85.494	94.252	-38.747	77.494	model.01	5	84.354	95.302	-37.177	74.354	3.1403	1	0.07638	nsig	0.6	nRPLC	[M-H]-	Melibiose	HMDB0000048	C05400	3	NA
Single_Model	268.104	0.571746	0.302837	1.88797	0.0590303		Anova	model.00	4	85.494	94.252	-38.747	77.494	model.01	5	83.53	94.478	-36.765	73.53	3.9642	1	0.04648	nsig	2.9	pHILIC	[M+H]+	Adenosine	HMDB0000050	C00212	1	0.813049
Single_Model	291.13	-0.38029	0.28574	-1.33089	0.183224		Anova	model.00	4	85.494	94.252	-38.747	77.494	model.01	5	85.589	96.537	-37.794	75.589	1.9052	1	0.1675	nsig	12.3	pHILIC	[M+H]+	Argininosuccinic acid	HMDB0000052	C03406	3	NA
Single_Model	428.036	0.170156	0.179175	0.949663	0.342284		Anova	model.00	4	85.494	94.252	-38.747	77.494	model.01	5	86.554	97.503	-38.277	76.554	0.9395	1	0.3324	nsig	11.3	pHILIC	[M+H]+	ADP	HMDB0000061	C00054	1	NA
Single_Model	162.112	0.652856	0.333897	1.95526	0.0505523		Anova	model.00	4	85.494	94.252	-38.747	77.494	model.01	5	83.106	94.055	-36.553	73.106	4.3876	1	0.0362	nsig	9.9	pHILIC	[M+H]+	L-Carnitine	HMDB0000062	C00318	1	0.811466
Single_Model	132.077	-0.211962	0.343052	-0.61787	0.536661		Anova	model.00	4	85.494	94.252	-38.747	77.494	model.01	5	87.108	98.056	-38.554	77.108	0.3857	1	0.5346	nsig	9.2	pHILIC	[M+H]+	Creatine	HMDB0000064	C00300	1	0.799685
Single_Model	251.078	0.611995	0.372984	1.64081	0.100837		Anova	model.00	4	85.494	94.252	-38.747	77.494	model.01	5	84.469	95.417	-37.234	74.469	3.0249	1	0.082	nsig	4.2	nHILIC	[M-H]-	Deoxyinosine	HMDB0000071	C05512	3	NA
Single_Model	173.009	-0.264642	0.277183	-0.954754	0.339702		Anova	model.00	4	85.494	94.252	-38.747	77.494	model.01	5	86.575	97.523	-38.287	76.575	0.919	1	0.3377	nsig	9.2	nHILIC	[M-H]-	Aconitic acid	HMDB0000072	C00417	1	NA
Single_Model	115.05	-0.0050187	0.238811	-0.0210153	0.983233		Anova	model.00	4	85.494	94.252	-38.747	77.494	model.01	5	87.493	98.442	-38.747	77.493	0.0004	1	0.9832	nsig	1.4	pHILIC	[M+H]+	Dihydrouracil	HMDB0000076	C00429	2	0.665535
Single_Model	179.048	0.351786	0.415629	0.846394	0.397333		Anova	model.00	4	85.494	94.252	-38.747	77.494	model.01	5	86.749	97.698	-38.375	76.749	0.7446	1	0.3882	nsig	0.7	pRPLC	[M+H]+	Cysteinylglycine	HMDB0000078	C01419	2	NA
Single_Model	104.071	0.0118209	0.336658	0.0351124	0.97199		Anova	model.00	4	85.494	94.252	-38.747	77.494	model.01	5	87.493	98.441	-38.746	77.493	0.0012	1	0.972	nsig	1.3	pHILIC	[M+H]+	Dimethylglycine	HMDB0000092	C01026	3	NA
Single_Model	322.044	0.366911	0.208026	1.76377	0.0777706		Anova	model.00	4	85.494	94.252	-38.747	77.494	model.01	5	83.788	94.737	-36.894	73.788	3.7054	1	0.05424	nsig	11.7	nHILIC	[M-H]-	Cytidine 5'-monophosphate	HMDB0000095	C00055	2	0.827239
Single_Model	104.107	-0.0209198	0.295547	-0.0707833	0.94357		Anova	model.00	4	85.494	94.252	-38.747	77.494	model.01	5	87.489	98.437	-38.744	77.489	0.005	1	0.9435	nsig	6.8	pHILIC	[M+H]+	Choline	HMDB0000097	C00114	1	0.816144
Single_Model	214.048	-0.0372278	0.0844059	-0.441057	0.659172		Anova	model.00	4	85.494	94.252	-38.747	77.494	model.01	5	87.297	98.245	-38.648	77.297	0.1969	1	0.6573	nsig	10.6	nHILIC	[M-H]-	Glycerylphosphorylethanolamine	HMDB0000114	C01233	2	NA
Single_Model	74.0248	-0.286746	0.325659	-0.880509	0.378583		Anova	model.00	4	85.494	94.252	-38.747	77.494	model.01	5	86.657	97.605	-38.328	76.657	0.837	1	0.3603	nsig	9.8	nHILIC	[M-H]-	Glycine	HMDB0000123	C00037	1	0.831224
Single_Model	171.006	0.309754	0.244773	1.26548	0.205701		Anova	model.00	4	85.494	94.252	-38.747	77.494	model.01	5	85.694	96.642	-37.847	75.694	1.7998	1	0.1797	nsig	11.9	nHILIC	[M-H]-	Glycerol 3-phosphate	HMDB0000126	C00093	3	NA
Single_Model	118.061	-0.319479	0.358185	-0.891937	0.372426		Anova	model.00	4	85.494	94.252	-38.747	77.494	model.01	5	86.707	97.655	-38.353	76.707	0.7869	1	0.375	nsig	9.5	pHILIC	[M+H]+	Guanidoacetic acid	HMDB0000128	C00581	1	NA
Single_Model	152.056	-0.0323017	0.416872	-0.077486	0.938237		Anova	model.00	4	85.494	94.252	-38.747	77.494	model.01	5	87.488	98.436	-38.744	77.488	0.006	1	0.9383	nsig	0.7	pRPLC	[M+H]+	Guanine	HMDB0000132	C00242	1	NA
Single_Model	282.084	0.0830195	0.202636	0.409698	0.682027		Anova	model.00	4	85.494	94.252	-38.747	77.494	model.01	5	87.317	98.265	-38.658	77.317	0.1769	1	0.6741	nsig	6.9	nHILIC	[M-H]-	Guanosine	HMDB0000133	C00387	2	0.806333
Single_Model	115.004	-0.00663894	0.225649	-0.0294215	0.976528		Anova	model.00	4	85.494	94.252	-38.747	77.494	model.01	5	87.493	98.441	-38.746	77.493	0.0009	1	0.9765	nsig	2.3	nHILIC	[M-H]-	Fumaric acid	HMDB0000134	C00122	1	0.841326
Single_Model	146.046	0.127073	0.356357	0.356588	0.7214		Anova	model.00	4	85.494	94.252	-38.747	77.494	model.01	5	87.36	98.308	-38.68	77.36	0.1336	1	0.7147	nsig	10.5	nHILIC	[M-H]-	L-Glutamic acid	HMDB0000148	C00025	1	0.853049
Single_Model	133.014	-0.0948023	0.245723	-0.385809	0.699638		Anova	model.00	4	85.494	94.252	-38.747	77.494	model.01	5	87.345	98.293	-38.672	77.345	0.1491	1	0.6994	nsig	12.3	nHILIC	[M-H]-	L-Malic acid	HMDB0000156	C00149	2	0.776106
Single_Model	137.046	0.130704	0.496287	0.263364	0.79227		Anova	model.00	4	85.494	94.252	-38.747	77.494	model.01	5	87.425	98.373	-38.712	77.425	0.0693	1	0.7923	nsig	3.7	pHILIC	[M+H]+	Hypoxanthine	HMDB0000157	C00262	1	0.872844
Single_Model	180.067	0.0610665	0.722874	0.0844774	0.932677		Anova	model.00	4	85.494	94.252	-38.747	77.494	model.01	5	87.487	98.435	-38.743	77.487	0.0071	1	0.9326	nsig	7.9	nHILIC	[M-H]-	L-Tyrosine	HMDB0000158	C00082	1	0.803852
Single_Model	166.086	0.419249	0.493033	0.850346	0.395132		Anova	model.00	4	85.494	94.252	-38.747	77.494	model.01	5	86.741	97.69	-38.371	76.741	0.7525	1	0.3857	nsig	6.2	pHILIC	[M+H]+	L-Phenylalanine	HMDB0000159	C00079	1	0.861962
Single_Model	88.0404	-0.372781	0.404645	-0.921254	0.356918		Anova	model.00	4	85.494	94.252	-38.747	77.494	model.01	5	86.288	97.236	-38.144	76.288	1.2057	1	0.2722	nsig	9.2	nHILIC	[M-H]-	L-Alanine	HMDB0000161	C00041	1	0.856592
Single_Model	116.071	0.012567	0.50478	0.0248959	0.980138		Anova	model.00	4	85.494	94.252	-38.747	77.494	model.01	5	87.493	98.441	-38.747	77.493	0.0006	1	0.9801	nsig	8	pHILIC	[M+H]+	L-Proline	HMDB0000162	C00148	1	NA
Single_Model	118.051	-0.204815	0.27162	-0.75405	0.450819		Anova	model.00	4	85.494	94.252	-38.747	77.494	model.01	5	86.663	97.611	-38.331	76.663	0.8313	1	0.3619	nsig	9.2	nHILIC	[M-H]-	Threonine	HMDB0000167	C00188	2	0.805164
Single_Model	347.04	0.0795237	0.160052	0.496861	0.619287		Anova	model.00	4	85.494	94.252	-38.747	77.494	model.01	5	87.241	98.189	-38.62	77.241	0.2528	1	0.6151	nsig	11.9	nHILIC	[M-H]-	Inosinic acid	HMDB0000175	C00130	3	NA
Single_Model	156.077	-0.478441	0.538646	-0.888228	0.374418		Anova	model.00	4	85.494	94.252	-38.747	77.494	model.01	5	86.701	97.649	-38.35	76.701	0.7931	1	0.3732	nsig	10.5	pHILIC	[M+H]+	Histidine	HMDB0000177	C00135	1	0.843032
Single_Model	147.113	-0.550316	0.512542	-1.0737	0.282958		Anova	model.00	4	85.494	94.252	-38.747	77.494	model.01	5	86.315	97.263	-38.158	76.315	1.1786	1	0.2776	nsig	16.3	pHILIC	[M+H]+	L-Lysine	HMDB0000182	C00047	1	0.837278
Single_Model	132.03	-0.00136923	0.168481	-0.00812693	0.993516		Anova	model.00	4	85.494	94.252	-38.747	77.494	model.01	5	87.494	98.442	-38.747	77.494	0.0001	1	0.9935	nsig	10.6	nHILIC	[M-H]-	L-Aspartic acid	HMDB0000191	C00049	1	0.838171
Single_Model	241.129	0.155502	0.41431	0.375326	0.707418		Anova	model.00	4	85.494	94.252	-38.747	77.494	model.01	5	87.363	98.311	-38.681	77.363	0.131	1	0.7174	nsig	11.9	pHILIC	[M+H]+	Anserine	HMDB0000194	C01262	2	0.759171
Single_Model	267.073	-0.511685	0.261773	-1.95469	0.0506199		Anova	model.00	4	85.494	94.252	-38.747	77.494	model.01	5	82.937	93.886	-36.469	72.937	4.5564	1	0.0328	nsig	5.6	nHILIC	[M-H]-	Inosine	HMDB0000195	C00294	1	0.852104
Single_Model	176.07	-0.409876	0.227097	-1.80485	0.0710986		Anova	model.00	4	85.494	94.252	-38.747	77.494	model.01	5	83.62	94.569	-36.81	73.62	3.8733	1	0.04906	nsig	6	pRPLC	[M+H]+	Indoleacetic acid	HMDB0000197	C00954	1	NA
Single_Model	204.123	-0.432522	0.340542	-1.2701	0.20405		Anova	model.00	4	85.494	94.252	-38.747	77.494	model.01	5	85.801	96.749	-37.901	75.801	1.6926	1	0.1933	nsig	8.3	pHILIC	[M+H]+	C2:0 AC (L-Acetylcarnitine)	HMDB0000201	C02571	1	0.841545
Single_Model	189.123	0.482502	0.399319	1.20831	0.226928		Anova	model.00	4	85.494	94.252	-38.747	77.494	model.01	5	85.895	96.844	-37.948	75.895	1.5983	1	0.2061	nsig	8.6	pHILIC	[M+H]+	N6-Acetyl-L-lysine	HMDB0000206	C02727	1	0.825035
Single_Model	179.056	0.130969	0.540411	0.242352	0.808508		Anova	model.00	4	85.494	94.252	-38.747	77.494	model.01	5	87.435	98.383	-38.717	77.435	0.0592	1	0.8078	nsig	9.6	nHILIC	[M-H]-	Myo-Inositol	HMDB0000211	C00137	1	0.822383
Single_Model	133.097	-0.0537818	0.370072	-0.145328	0.884452		Anova	model.00	4	85.494	94.252	-38.747	77.494	model.01	5	87.473	98.421	-38.736	77.473	0.0211	1	0.8846	nsig	16.6	pHILIC	[M+H]+	Ornithine	HMDB0000214	C00077	1	NA
Single_Model	204.087	-0.00246437	0.360272	-0.00684032	0.994542		Anova	model.00	4	85.494	94.252	-38.747	77.494	model.01	5	87.494	98.442	-38.747	77.494	0	1	0.9945	nsig	10.6	pHILIC	[M+H-H2O]+	N-Acetylglucosamine	HMDB0000215	C00140	2	0.751595
Single_Model	140.012	0.146391	0.192613	0.760026	0.447239		Anova	model.00	4	85.494	94.252	-38.747	77.494	model.01	5	86.898	97.846	-38.449	76.898	0.5961	1	0.4401	nsig	14.2	nHILIC	[M-H]-	O-Phosphoethanolamine	HMDB0000224	C00346	2	0.823255
Single_Model	155.01	0.397448	0.298948	1.32949	0.183686		Anova	model.00	4	85.494	94.252	-38.747	77.494	model.01	5	85.494	96.442	-37.747	75.494	2.0001	1	0.1573	nsig	6.6	nHILIC	[M-H]-	Orotic Acid	HMDB0000226	C00295	1	NA
Single_Model	333.05	0.133428	0.142377	0.937145	0.348684		Anova	model.00	4	85.494	94.252	-38.747	77.494	model.01	5	86.583	97.531	-38.291	76.583	0.9109	1	0.3399	nsig	8.7	nHILIC	[M-H]-	Nicotinamide ribotide	HMDB0000229	C00455	3	NA
Single_Model	308.099	-0.622042	0.365411	-1.70231	0.0886971		Anova	model.00	4	85.494	94.252	-38.747	77.494	model.01	5	84.349	95.297	-37.174	74.349	3.1449	1	0.07616	nsig	9.5	nHILIC	[M-H]-	N-Acetylneuraminic acid	HMDB0000230	C19910	1	0.807054
Single_Model	166.015	-0.298808	0.216087	-1.38281	0.166722		Anova	model.00	4	85.494	94.252	-38.747	77.494	model.01	5	85.466	96.414	-37.733	75.466	2.0276	1	0.1545	nsig	11.4	nHILIC	[M-H]-	Quinolinic acid	HMDB0000232	C03722	2	0.768711
Single_Model	326.094	0.160448	0.129861	1.23553	0.216633		Anova	model.00	4	85.494	94.252	-38.747	77.494	model.01	5	86.041	96.99	-38.021	76.041	1.4524	1	0.2282	nsig	8.3	nRPLC	[M-H]-	Thiamine mononitrate	HMDB0000235	C00378	3	NA
Single_Model	80.9652	-0.149439	0.195692	-0.763643	0.44508		Anova	model.00	4	85.494	94.252	-38.747	77.494	model.01	5	86.852	97.8	-38.426	76.852	0.6422	1	0.4229	nsig	7.7	nHILIC	[M-H]-	Sulfite	HMDB0000240	C00094	3	NA
Single_Model	87.0088	-0.0699338	0.340354	-0.205473	0.837202		Anova	model.00	4	85.494	94.252	-38.747	77.494	model.01	5	87.452	98.4	-38.726	77.452	0.0422	1	0.8372	nsig	10.2	nHILIC	[M-H]-	Pyruvic acid	HMDB0000243	C00022	2	0.735161
Single_Model	227.102	0.0453684	0.204084	0.222303	0.824078		Anova	model.00	4	85.494	94.252	-38.747	77.494	model.01	5	87.446	98.394	-38.723	77.446	0.0483	1	0.8261	nsig	11.1	pHILIC	[M+H]+	Porphobilinogen	HMDB0000245	C00931	3	NA
Single_Model	300.289	-0.29892	0.168306	-1.77605	0.0757254		Anova	model.00	4	85.494	94.252	-38.747	77.494	model.01	5	83.976	94.924	-36.988	73.976	3.5179	1	0.06071	nsig	0.9	pHILIC	[M+H]+	Sphingosine	HMDB0000252	C00319	2	NA
Single_Model	117.019	0.152643	0.27025	0.56482	0.572197		Anova	model.00	4	85.494	94.252	-38.747	77.494	model.01	5	87.143	98.091	-38.571	77.143	0.351	1	0.5535	nsig	10.1	nHILIC	[M-H]-	Succinic acid	HMDB0000254	C00042	2	0.847093
Single_Model	128.035	-0.496291	0.475417	-1.04391	0.296529		Anova	model.00	4	85.494	94.252	-38.747	77.494	model.01	5	86.155	97.104	-38.078	76.155	1.3384	1	0.2473	nsig	7.9	nHILIC	[M-H]-	L-Pyroglutamic acid	HMDB0000267	C01879	1	0.838933
Single_Model	302.305	-0.162976	0.24165	-0.674427	0.50004		Anova	model.00	4	85.494	94.252	-38.747	77.494	model.01	5	87.037	97.986	-38.519	77.037	0.4563	1	0.4993	nsig	4.1	pHILIC	[M+H]+	Sphinganine	HMDB0000269	C00836	3	NA
Single_Model	90.055	-0.439202	0.366035	-1.19989	0.230182		Anova	model.00	4	85.494	94.252	-38.747	77.494	model.01	5	86.014	96.963	-38.007	76.014	1.4794	1	0.2239	nsig	1.5	pHILIC	[M+H]+	Sarcosine	HMDB0000271	C00213	2	0.772671
Single_Model	277.139	0.252758	0.240998	1.0488	0.294271		Anova	model.00	4	85.494	94.252	-38.747	77.494	model.01	5	86.33	97.278	-38.165	76.33	1.1641	1	0.2806	nsig	11.7	pHILIC	[M+H]+	Saccharopine	HMDB0000279	C00449	3	NA
Single_Model	565.047	0.069417	0.247204	0.280808	0.778857		Anova	model.00	4	85.494	94.252	-38.747	77.494	model.01	5	87.414	98.362	-38.707	77.414	0.08	1	0.7773	nsig	0.7	nRPLC	[M-H]-	Uridine diphosphate glucose	HMDB0000286	C00029	2	0.747274
Single_Model	167.02	0.0900348	0.152309	0.591134	0.554431		Anova	model.00	4	85.494	94.252	-38.747	77.494	model.01	5	87.136	98.084	-38.568	77.136	0.358	1	0.5496	nsig	0.6	nRPLC	[M+H]+	Uric acid	HMDB0000289	C00366	1	NA
Single_Model	606.075	-0.0487676	0.0814174	-0.598982	0.549185		Anova	model.00	4	85.494	94.252	-38.747	77.494	model.01	5	87.11	98.058	-38.555	77.11	0.3841	1	0.5354	nsig	10.6	nHILIC	[M-H]-	Uridine diphosphate-N-acetylglucosamine	HMDB0000290	C00043	2	0.800014
Single_Model	151.026	0.518879	0.526982	0.984624	0.324809		Anova	model.00	4	85.494	94.252	-38.747	77.494	model.01	5	86.41	97.359	-38.205	76.41	1.0834	1	0.2979	nsig	4.7	nHILIC	[M-H]-	Xanthine	HMDB0000292	C00385	1	0.87822
Single_Model	405.009	0.109248	0.327162	0.333928	0.738434		Anova	model.00	4	85.494	94.252	-38.747	77.494	model.01	5	87.381	98.329	-38.691	77.381	0.1126	1	0.7372	nsig	10.9	pHILIC	[M+H]+	Uridine 5'-diphosphate	HMDB0000295	C00015	1	NA
Single_Model	243.062	0.758549	0.428689	1.76946	0.0768171		Anova	model.00	4	85.494	94.252	-38.747	77.494	model.01	5	83.36	94.309	-36.68	73.36	4.1334	1	0.04205	nsig	4	nHILIC	[M-H]-	Uridine	HMDB0000296	C00299	1	0.83688
Single_Model	137.036	-0.333323	0.234084	-1.42395	0.154462		Anova	model.00	4	85.494	94.252	-38.747	77.494	model.01	5	85.233	96.181	-37.616	75.233	2.2611	1	0.1327	nsig	3.2	nHILIC	[M-H]-	Urocanic acid	HMDB0000301	C00785	1	NA
Single_Model	565.048	-0.111284	0.12357	-0.900571	0.367816		Anova	model.00	4	85.494	94.252	-38.747	77.494	model.01	5	86.595	97.544	-38.298	76.595	0.8986	1	0.3432	nsig	10.9	nHILIC	[M-H]-	Uridine diphosphate glucose	HMDB0000302	C00052	1	0.65368
Single_Model	287.236	-0.382585	0.216582	-1.76646	0.0773183		Anova	model.00	4	85.494	94.252	-38.747	77.494	model.01	5	83.987	94.935	-36.993	73.987	3.5069	1	0.06111	nsig	11.2	pRPLC	[M+H]+	Vitamin A	HMDB0000305	C19962	3	NA
Single_Model	375.181	-0.102946	0.0982799	-1.04747	0.294881		Anova	model.00	4	85.494	94.252	-38.747	77.494	model.01	5	86.34	97.288	-38.17	76.34	1.1542	1	0.2827	nsig	1.5	nHILIC	[M-H]-	18-Oxocortisol	HMDB0000332	NA	3	NA
Single_Model	171.066	-0.547764	0.471179	-1.16254	0.245016		Anova	model.00	4	85.494	94.252	-38.747	77.494	model.01	5	86.063	97.011	-38.031	76.063	1.4313	1	0.2316	nsig	2.8	nRPLC	[M-H]-	C8:1, DC FA (Octenedioic acid)	HMDB0000341	NA	2	NA
Single_Model	217.108	-0.595999	0.418629	-1.42369	0.154535		Anova	model.00	4	85.494	94.252	-38.747	77.494	model.01	5	85.242	96.191	-37.621	75.242	2.2514	1	0.1335	nsig	8.4	nHILIC	[M-H]-	3-Hydroxysebacic acid	HMDB0000350	NA	3	NA
Single_Model	331.225	-0.11522	0.195053	-0.59071	0.554715		Anova	model.00	4	85.494	94.252	-38.747	77.494	model.01	5	87.141	98.089	-38.57	77.141	0.3531	1	0.5524	nsig	8	pRPLC	[M+H]+	Hydroxyprogesterone	HMDB0000374	C01176	2	NA
Single_Model	165.055	0.47719	0.329392	1.4487	0.147421		Anova	model.00	4	85.494	94.252	-38.747	77.494	model.01	5	85.554	96.502	-37.777	75.554	1.94	1	0.1637	nsig	3.8	nRPLC	[M-H]-	3-(3-Hydroxyphenyl)propionic acid	HMDB0000375	C11457	2	0.758393
Single_Model	383.154	0.0519114	0.142039	0.365473	0.714758		Anova	model.00	4	85.494	94.252	-38.747	77.494	model.01	5	87.359	98.307	-38.679	77.359	0.1349	1	0.7134	nsig	4.6	nHILIC	[M-H]-	3b,16a-Dihydroxyandrostenone sulfate	HMDB0000386	NA	3	NA
Single_Model	141.092	-0.452135	0.524807	-0.861526	0.388948		Anova	model.00	4	85.494	94.252	-38.747	77.494	model.01	5	86.729	97.677	-38.364	76.729	0.765	1	0.3818	nsig	5.5	nRPLC	[M-H]-	C8:1 FA (Octenoic acid)	HMDB0000392	NA	2	NA
Single_Model	273.171	0.0671438	0.352525	0.190465	0.848944		Anova	model.00	4	85.494	94.252	-38.747	77.494	model.01	5	87.458	98.406	-38.729	77.458	0.0363	1	0.8489	nsig	8.1	nRPLC	[M-H]-	3-Hydroxytetradecanedioic acid	HMDB0000394	NA	3	NA
Single_Model	267.072	0.66264	0.358473	1.84851	0.0645289		Anova	model.00	4	85.494	94.252	-38.747	77.494	model.01	5	83.553	94.502	-36.777	73.553	3.9403	1	0.04714	nsig	10	nHILIC	[M-H]-	3-Deoxy-D-glycero-D-galacto-2-nonulosonic acid	HMDB0000425	NA	2	0.866142
Single_Model	195.066	-0.0948017	0.159809	-0.59322	0.553034		Anova	model.00	4	85.494	94.252	-38.747	77.494	model.01	5	87.126	98.075	-38.563	77.126	0.3675	1	0.5444	nsig	3.3	nHILIC	[M-H]-	Homoveratric acid	HMDB0000434	NA	3	NA
Single_Model	159.102	-0.623842	0.506783	-1.23099	0.218328		Anova	model.00	4	85.494	94.252	-38.747	77.494	model.01	5	85.886	96.835	-37.943	75.886	1.6075	1	0.2048	nsig	4.8	nRPLC	[M-H]-	C8:0,OH FA (Hydroxyoctanoic acid)	HMDB0000486	NA	2	0.742816
Single_Model	116.035	0.780363	0.717661	1.08737	0.276873		Anova	model.00	4	85.494	94.252	-38.747	77.494	model.01	5	85.847	96.795	-37.923	75.847	1.647	1	0.1994	nsig	7	nHILIC	[M-H]-	Acetylglycine	HMDB0000532	NA	2	0.673543
Single_Model	159.066	-0.0289172	0.220195	-0.131325	0.895518		Anova	model.00	4	85.494	94.252	-38.747	77.494	model.01	5	87.477	98.425	-38.738	77.477	0.0173	1	0.8955	nsig	2.3	nHILIC	[M-H]-	3-Methyladipic acid	HMDB0000555	NA	3	NA
Single_Model	114.066	-0.349353	0.356464	-0.980051	0.327061		Anova	model.00	4	85.494	94.252	-38.747	77.494	model.01	5	86.48	97.428	-38.24	76.48	1.014	1	0.3139	nsig	3.3	pHILIC	[M+H]+	Creatinine	HMDB0000562	C00791	1	0.780266
Single_Model	147.045	0.963965	0.654378	1.4731	0.140723		Anova	model.00	4	85.494	94.252	-38.747	77.494	model.01	5	85.018	95.966	-37.509	75.018	2.4758	1	0.1156	nsig	0.9	nRPLC	[M-H]-	Cinnamic acid	HMDB0000567	C10438	3	NA
Single_Model	122.027	-0.185101	0.183051	-1.0112	0.311921		Anova	model.00	4	85.494	94.252	-38.747	77.494	model.01	5	86.361	97.309	-38.181	76.361	1.1328	1	0.2872	nsig	11.2	pHILIC	[M+H]+	L-Cysteine	HMDB0000574	C00097	1	NA
Single_Model	131.035	-0.0351659	0.24124	-0.145771	0.884102		Anova	model.00	4	85.494	94.252	-38.747	77.494	model.01	5	87.473	98.421	-38.736	77.473	0.0212	1	0.8841	nsig	3.3	nHILIC	[M-H]-	Monoethyl malonic acid	HMDB0000576	NA	3	NA
Single_Model	293.114	-0.00590327	0.171994	-0.0343226	0.97262		Anova	model.00	4	85.494	94.252	-38.747	77.494	model.01	5	87.493	98.441	-38.746	77.493	0.0012	1	0.9726	nsig	9	nHILIC	[M-H]-	gamma-Glutamylphenylalanine	HMDB0000594	NA	3	NA
Single_Model	407.28	0.0683947	0.116313	0.588022	0.556517		Anova	model.00	4	85.494	94.252	-38.747	77.494	model.01	5	87.155	98.103	-38.577	77.155	0.339	1	0.5604	nsig	9.7	nRPLC	[M-H]-	Cholic acid	HMDB0000619	C00695	2	0.742235
Single_Model	195.051	-0.403377	0.246226	-1.63824	0.101371		Anova	model.00	4	85.494	94.252	-38.747	77.494	model.01	5	84.406	95.355	-37.203	74.406	3.0876	1	0.07889	nsig	10.6	nHILIC	[M-H]-	Gluconic acid	HMDB0000625	C00257	2	NA
Single_Model	378.104	-0.225976	0.20773	-1.08784	0.276668		Anova	model.00	4	85.494	94.252	-38.747	77.494	model.01	5	86.178	97.127	-38.089	76.178	1.3154	1	0.2514	nsig	8.7	nHILIC	[M-H]-	Chondroitin	HMDB0000629	C00401	3	NA
Single_Model	129.019	-0.04051	0.284683	-0.142298	0.886844		Anova	model.00	4	85.494	94.252	-38.747	77.494	model.01	5	87.474	98.422	-38.737	77.474	0.0202	1	0.8869	nsig	11.2	nHILIC	[M-H]-	Citraconic acid	HMDB0000634	C02226	2	0.715333
Single_Model	145.062	0.384958	0.25465	1.51172	0.130606		Anova	model.00	4	85.494	94.252	-38.747	77.494	model.01	5	84.748	95.697	-37.374	74.748	2.7455	1	0.09753	nsig	9.7	nHILIC	[M-H]-	L-Glutamine	HMDB0000641	C00064	1	0.87911
Single_Model	316.248	0.101289	0.160226	0.632159	0.527283		Anova	model.00	4	85.494	94.252	-38.747	77.494	model.01	5	87.072	98.02	-38.536	77.072	0.4218	1	0.516	nsig	5.7	pHILIC	[M+H]+	C10:0 AC (Decanoylcarnitine)	HMDB0000651	NA	2	0.770104
Single_Model	425.08	-0.272857	0.268352	-1.01679	0.309255		Anova	model.00	4	85.494	94.252	-38.747	77.494	model.01	5	86.413	97.361	-38.206	76.413	1.0809	1	0.2985	nsig	12.5	nHILIC	[M-H]-	Cysteineglutathione disulfide	HMDB0000656	NA	1	0.85359
Single_Model	209.03	-0.0810965	0.228876	-0.354324	0.723096		Anova	model.00	4	85.494	94.252	-38.747	77.494	model.01	5	87.368	98.316	-38.684	77.368	0.1258	1	0.7228	nsig	12.6	nHILIC	[M-H]-	Glucaric acid	HMDB0000663	C00818	2	NA
Single_Model	131.071	0.0230091	0.236976	0.0970944	0.922651		Anova	model.00	4	85.494	94.252	-38.747	77.494	model.01	5	87.484	98.433	-38.742	77.484	0.0095	1	0.9225	nsig	3.1	nHILIC	[M-H]-	C6:0,OH FA (Hydroxyhexanoic acid)	HMDB0000665	NA	2	0.76881
Single_Model	189.135	-0.545982	0.443151	-1.23205	0.217932		Anova	model.00	4	85.494	94.252	-38.747	77.494	model.01	5	85.954	96.902	-37.977	75.954	1.5399	1	0.2146	nsig	14.8	pHILIC	[M+H]+	Homoarginine	HMDB0000670	C01924	1	0.855531
Single_Model	204.067	-0.562215	0.353242	-1.59159	0.111477		Anova	model.00	4	85.494	94.252	-38.747	77.494	model.01	5	84.667	95.615	-37.334	74.667	2.8268	1	0.0927	nsig	5.5	nHILIC	[M-H]-	Indolelactic acid	HMDB0000671	C02043	2	0.724142
Single_Model	209.091	0.00165976	0.312079	0.0053184	0.995757		Anova	model.00	4	85.494	94.252	-38.747	77.494	model.01	5	87.494	98.442	-38.747	77.494	0	1	0.9958	nsig	3.5	pRPLC	[M+H]+	L-Kynurenine	HMDB0000684	C00328	3	NA
Single_Model	132.102	0.249795	0.432713	0.577276	0.563753		Anova	model.00	4	85.494	94.252	-38.747	77.494	model.01	5	87.154	98.103	-38.577	77.154	0.3394	1	0.5602	nsig	6.5	pHILIC	[M+H]+	L-Isoleucine|L-Leucine	HMDB0000687	C00123	1	0.852677
Single_Model	150.058	0.203619	0.130698	1.55793	0.119249		Anova	model.00	4	85.494	94.252	-38.747	77.494	model.01	5	84.902	95.85	-37.451	74.902	2.5922	1	0.1074	nsig	7.2	pHILIC	[M+H]+	L-Methionine	HMDB0000696	C00073	2	0.663864
Single_Model	179.035	-0.065504	0.224449	-0.291843	0.770407		Anova	model.00	4	85.494	94.252	-38.747	77.494	model.01	5	87.408	98.357	-38.704	77.408	0.0856	1	0.7699	nsig	2.8	nHILIC	[M-H]-	4-Hydroxyphenylpyruvic acid	HMDB0000707	C01179	3	NA
Single_Model	130.086	-0.160411	0.242627	-0.661143	0.508521		Anova	model.00	4	85.494	94.252	-38.747	77.494	model.01	5	87.048	97.997	-38.524	77.048	0.4456	1	0.5044	nsig	7.7	pHILIC	[M+H]+	L-Pipecolic acid	HMDB0000716	C00408	1	NA
Single_Model	253.056	0.234607	0.213531	1.0987	0.271897		Anova	model.00	4	85.494	94.252	-38.747	77.494	model.01	5	86.215	97.163	-38.107	76.215	1.279	1	0.2581	nsig	9.7	nHILIC	[M-H]-	Magnesium levulinate	HMDB0000720	NA	3	NA
Single_Model	252.073	-0.0103722	0.256608	-0.0404203	0.967758		Anova	model.00	4	85.494	94.252	-38.747	77.494	model.01	5	87.492	98.44	-38.746	77.492	0.0016	1	0.9677	nsig	8.6	nRPLC	[M-H]-	L-Threoneopterin	HMDB0000727	NA	3	NA
Single_Model	188.07	0.241045	0.332315	0.725352	0.468236		Anova	model.00	4	85.494	94.252	-38.747	77.494	model.01	5	86.939	97.887	-38.469	76.939	0.5549	1	0.4563	nsig	1.4	pRPLC	[M+H]+	Indoleacrylic acid	HMDB0000734	NA	3	NA
Single_Model	230.139	0.291555	0.344078	0.847352	0.396799		Anova	model.00	4	85.494	94.252	-38.747	77.494	model.01	5	86.761	97.709	-38.38	76.761	0.7328	1	0.392	nsig	4.8	nRPLC	[M-H]-	Isobutyryl-L-carnitine	HMDB0000736	NA	3	NA
Single_Model	118.065	-0.276179	0.311791	-0.88578	0.375736		Anova	model.00	4	85.494	94.252	-38.747	77.494	model.01	5	86.675	97.623	-38.338	76.675	0.8188	1	0.3655	nsig	0.9	pHILIC	[M+H]+	Indole	HMDB0000738	C00463	3	NA
Single_Model	243.062	1.11908	0.604844	1.85019	0.0642864		Anova	model.00	4	85.494	94.252	-38.747	77.494	model.01	5	82.771	93.719	-36.385	72.771	4.7229	1	0.02976	nsig	6	nHILIC	[M-H]-	Pseudouridine	HMDB0000767	C02067	1	0.845702
Single_Model	165.056	-0.0889549	0.250723	-0.354793	0.722745		Anova	model.00	4	85.494	94.252	-38.747	77.494	model.01	5	87.366	98.314	-38.683	77.366	0.1279	1	0.7206	nsig	3.3	nHILIC	[M-H]-	3-Phenyllactic acid	HMDB0000779	C01479	2	0.807488
Single_Model	287.052	-0.594722	0.353998	-1.68002	0.0929538		Anova	model.00	4	85.494	94.252	-38.747	77.494	model.01	5	83.697	94.646	-36.849	73.697	3.7965	1	0.05136	nsig	8.2	nHILIC	[M-H]-	Orotidine	HMDB0000788	C01103	1	0.806274
Single_Model	391.285	0.0201369	0.0937931	0.214695	0.830005		Anova	model.00	4	85.494	94.252	-38.747	77.494	model.01	5	87.45	98.398	-38.725	77.45	0.044	1	0.8339	nsig	1.9	nHILIC	[M-H]-	Murocholic acid	HMDB0000811	C15515	2	0.774907
Single_Model	174.041	-0.0993046	0.117391	-0.845931	0.397591		Anova	model.00	4	85.494	94.252	-38.747	77.494	model.01	5	86.734	97.683	-38.367	76.734	0.7595	1	0.3835	nsig	10.3	nHILIC	[M-H]-	N-Acetyl-L-aspartic acid	HMDB0000812	C01042	1	NA
Single_Model	268.103	0.0607091	0.159903	0.379663	0.704196		Anova	model.00	4	85.494	94.252	-38.747	77.494	model.01	5	87.351	98.299	-38.675	77.351	0.1433	1	0.705	nsig	11.2	pHILIC	[M+H]+	Neuraminic acid	HMDB0000830	C06469	3	NA
Single_Model	194.046	-0.0746406	0.175853	-0.424449	0.671238		Anova	model.00	4	85.494	94.252	-38.747	77.494	model.01	5	87.312	98.26	-38.656	77.312	0.1822	1	0.6695	nsig	4.8	nHILIC	[M-H]-	2-Hydroxyhippuric acid	HMDB0000840	C07588	2	0.676246
Single_Model	428.373	0.162598	0.175315	0.927461	0.353687		Anova	model.00	4	85.494	94.252	-38.747	77.494	model.01	5	86.578	97.526	-38.289	76.578	0.9161	1	0.3385	nsig	10.8	pRPLC	[M+H]+	C18:0 AC (Stearoylcarnitine)	HMDB0000848	NA	2	0.744107
Single_Model	256.104	-0.521867	0.377306	-1.38314	0.166622		Anova	model.00	4	85.494	94.252	-38.747	77.494	model.01	5	85.452	96.4	-37.726	75.452	2.0416	1	0.153	nsig	1.4	pRPLC	[M+H]+	Nicotinamide riboside	HMDB0000855	C03150	3	NA
Single_Model	500.304	-0.0124031	0.0861293	-0.144005	0.885496		Anova	model.00	4	85.494	94.252	-38.747	77.494	model.01	5	87.473	98.421	-38.737	77.473	0.0207	1	0.8856	nsig	10.3	pRPLC	[M+H]+	Tauroursodeoxycholic acid	HMDB0000874	NA	3	NA
Single_Model	118.086	-0.662795	0.418891	-1.58226	0.11359		Anova	model.00	4	85.494	94.252	-38.747	77.494	model.01	5	84.506	95.454	-37.253	74.506	2.988	1	0.08388	nsig	7.3	pHILIC	[M+H]+	L-Valine	HMDB0000883	C00183	1	0.833687
Single_Model	144.065	-0.0190586	0.358304	-0.0531912	0.95758		Anova	model.00	4	85.494	94.252	-38.747	77.494	model.01	5	87.491	98.439	-38.745	77.491	0.0028	1	0.9576	nsig	1.9	pHILIC	[M+H]+	Vinylacetylglycine	HMDB0000894	NA	3	NA
Single_Model	174.088	-0.267102	0.189002	-1.41322	0.15759		Anova	model.00	4	85.494	94.252	-38.747	77.494	model.01	5	85.315	96.263	-37.657	75.315	2.1793	1	0.1399	nsig	10.3	nHILIC	[M-H]-	Citrulline	HMDB0000904	C00327	1	NA
Single_Model	213.186	-0.131724	0.30193	-0.436273	0.662639		Anova	model.00	4	85.494	94.252	-38.747	77.494	model.01	5	87.303	98.251	-38.651	77.303	0.1911	1	0.662	nsig	10.7	nRPLC	[M-H]-	C13:0 FA (Tridecanoic acid)	HMDB0000910	C17076	2	0.777656
Single_Model	211.061	0.0334159	0.135124	0.247298	0.804678		Anova	model.00	4	85.494	94.252	-38.747	77.494	model.01	5	87.433	98.381	-38.716	77.433	0.0611	1	0.8047	nsig	2.1	nHILIC	[M-H]-	Vanillactic acid	HMDB0000913	NA	3	NA
Single_Model	76.0757	-0.148408	0.236929	-0.626383	0.531064		Anova	model.00	4	85.494	94.252	-38.747	77.494	model.01	5	87.094	98.042	-38.547	77.094	0.4002	1	0.527	nsig	9.4	pHILIC	[M+H]+	Trimethylamine N-oxide (TMAO)	HMDB0000925	C01104	2	0.826084
Single_Model	80.0494	-0.155968	0.298197	-0.523036	0.600949		Anova	model.00	4	85.494	94.252	-38.747	77.494	model.01	5	87.218	98.166	-38.609	77.218	0.2759	1	0.5994	nsig	1.4	pHILIC	[M+H]+	Pyridine	HMDB0000926	C00747	2	0.830188
Single_Model	205.097	0.520155	0.405862	1.28161	0.19998		Anova	model.00	4	85.494	94.252	-38.747	77.494	model.01	5	85.68	96.629	-37.84	75.68	1.8135	1	0.1781	nsig	6.8	pHILIC	[M+H]+	L-Tryptophan	HMDB0000929	C00078	1	0.757096
Single_Model	579.026	-0.191446	0.318388	-0.601297	0.547642		Anova	model.00	4	85.494	94.252	-38.747	77.494	model.01	5	87.128	98.076	-38.564	77.128	0.3656	1	0.5454	nsig	9.9	nRPLC	[M-H]-	Uridine diphosphate glucuronic acid	HMDB0000935	C00167	3	NA
Single_Model	309.015	-0.221809	0.43661	-0.508025	0.611436		Anova	model.00	4	85.494	94.252	-38.747	77.494	model.01	5	87.23	98.178	-38.615	77.23	0.2638	1	0.6075	nsig	4.7	nHILIC	[M-H]-	Calcium threonate	HMDB0000943	C01620	3	NA
Single_Model	185.155	-0.318952	0.412371	-0.773458	0.439251		Anova	model.00	4	85.494	94.252	-38.747	77.494	model.01	5	86.881	97.83	-38.441	76.881	0.6126	1	0.4338	nsig	9.9	nRPLC	[M-H]-	C11:0 FA (Undecanoic acid)	HMDB0000947	C17715	2	0.727092
Single_Model	98.9842	-0.194881	0.332901	-0.5854	0.558279		Anova	model.00	4	85.494	94.252	-38.747	77.494	model.01	5	87.151	98.099	-38.576	77.151	0.3427	1	0.5583	nsig	12.1	pHILIC	[M+H]+	Hydrogen phosphate	HMDB0000973	C00009	3	NA
Single_Model	206.046	0.227484	0.110514	2.05842	0.0395499		Anova	model.00	4	85.494	94.252	-38.747	77.494	model.01	5	83.692	94.64	-36.846	73.692	3.8023	1	0.05118	nsig	7.3	nHILIC	[M-H]-	4-(2-Aminophenyl)-2,4-dioxobutanoic acid	HMDB0000978	C01252	3	NA
Single_Model	314.075	-0.111175	0.15778	-0.704616	0.481049		Anova	model.00	4	85.494	94.252	-38.747	77.494	model.01	5	86.985	97.934	-38.493	76.985	0.5086	1	0.4758	nsig	11	pHILIC	[M+H]+	Phosphoribosylformylglycineamidine	HMDB0000999	C04640	3	NA
Single_Model	193.096	0.0267235	0.173989	0.153593	0.877931		Anova	model.00	4	85.494	94.252	-38.747	77.494	model.01	5	87.47	98.418	-38.735	77.47	0.0236	1	0.8779	nsig	3.1	pRPLC	[M+H]+	Oxoamide	HMDB0001004	NA	3	NA
Single_Model	298.069	0.0722686	0.218168	0.331251	0.740455		Anova	model.00	4	85.494	94.252	-38.747	77.494	model.01	5	87.384	98.332	-38.692	77.384	0.11	1	0.7402	nsig	0.7	nRPLC	[M-H]-	D-4'-Phosphopantothenate	HMDB0001016	C03492	3	NA
Single_Model	535.037	0.175125	0.113296	1.54573	0.12217		Anova	model.00	4	85.494	94.252	-38.747	77.494	model.01	5	85.035	95.984	-37.518	75.035	2.4586	1	0.1169	nsig	11	nHILIC	[M-H]-	UDP-D-Xylose	HMDB0001018	C00190	3	NA
Single_Model	249.055	-0.229981	0.16574	-1.3876	0.165258		Anova	model.00	4	85.494	94.252	-38.747	77.494	model.01	5	85.393	96.341	-37.696	75.393	2.1009	1	0.1472	nsig	0.9	nRPLC	[M-H]-	gamma-Glutamylcysteine	HMDB0001049	C00669	3	NA
Single_Model	300.049	0.395374	0.244965	1.614	0.106527		Anova	model.00	4	85.494	94.252	-38.747	77.494	model.01	5	84.553	95.501	-37.276	74.553	2.9409	1	0.08636	nsig	11.6	nHILIC	[M-H]-	N-Acetyl-D-Glucosamine 6-Phosphate	HMDB0001062	C00357	3	NA
Single_Model	590.089	0.190304	0.146675	1.29745	0.194476		Anova	model.00	4	85.494	94.252	-38.747	77.494	model.01	5	85.769	96.718	-37.885	75.769	1.7246	1	0.1891	nsig	11.4	pHILIC	[M+H]+	GDP-L-fucose	HMDB0001095	C00325	3	NA
Single_Model	219.099	0.147347	0.179261	0.821967	0.411095		Anova	model.00	4	85.494	94.252	-38.747	77.494	model.01	5	86.837	97.786	-38.419	76.837	0.6565	1	0.4178	nsig	8.4	nHILIC	[M-H]-	N-Acetyl-b-glucosaminylamine	HMDB0001104	C01239	3	NA
Single_Model	297.107	0.160844	0.26708	0.602231	0.547021		Anova	model.00	4	85.494	94.252	-38.747	77.494	model.01	5	87.129	98.077	-38.565	77.129	0.3646	1	0.546	nsig	7.1	nRPLC	[M-H]-	7-Methylguanosine	HMDB0001107	NA	3	NA
Single_Model	258.038	0.024763	0.156734	0.157994	0.874462		Anova	model.00	4	85.494	94.252	-38.747	77.494	model.01	5	87.469	98.417	-38.734	77.469	0.0249	1	0.8745	nsig	10.8	nHILIC	[M-H]-	Glucosamine-1P	HMDB0001109	C06156	3	NA
Single_Model	136.04	0.0225138	0.348091	0.0646777	0.948431		Anova	model.00	4	85.494	94.252	-38.747	77.494	model.01	5	87.49	98.438	-38.745	77.49	0.0042	1	0.9485	nsig	2.2	nHILIC	[M-H]-	Anthranilic acid	HMDB0001123	C00108	1	NA
Single_Model	336.051	0.132048	0.115153	1.14672	0.251497		Anova	model.00	4	85.494	94.252	-38.747	77.494	model.01	5	86.099	97.048	-38.05	76.099	1.3946	1	0.2376	nsig	11.9	nHILIC	[M-H]-	Nicotinic acid mononucleotide	HMDB0001132	C01185	3	NA
Single_Model	188.056	-0.145619	0.180528	-0.806626	0.419882		Anova	model.00	4	85.494	94.252	-38.747	77.494	model.01	5	86.792	97.74	-38.396	76.792	0.7017	1	0.4022	nsig	10.2	nHILIC	[M-H]-	N-Acetyl-L-glutamic acid	HMDB0001138	C00624	2	0.820065
Single_Model	110.06	-0.0174088	0.237153	-0.0734075	0.941482		Anova	model.00	4	85.494	94.252	-38.747	77.494	model.01	5	87.488	98.437	-38.744	77.488	0.0054	1	0.9415	nsig	6.3	pHILIC	[M+H]+	4-Aminophenol	HMDB0001169	C02372	2	0.669089
Single_Model	298.097	0.185573	0.111398	1.66586	0.0957404		Anova	model.00	4	85.494	94.252	-38.747	77.494	model.01	5	84.354	95.302	-37.177	74.354	3.1399	1	0.0764	nsig	1.5	pHILIC	[M+H]+	5'-Deoxy-5'-(methylthio)adenosine	HMDB0001173	C00170	1	0.772115
Single_Model	613.141	-0.0973026	0.102509	-0.949213	0.342512		Anova	model.00	4	85.494	94.252	-38.747	77.494	model.01	5	86.463	97.412	-38.232	76.463	1.0305	1	0.31	nsig	10.9	nHILIC	[M-H]-	Cytidine monophosphate N-acetylneuraminic acid	HMDB0001176	C00128	3	NA
Single_Model	558.063	0.191406	0.20551	0.93137	0.351662		Anova	model.00	4	85.494	94.252	-38.747	77.494	model.01	5	86.598	97.547	-38.299	76.598	0.8953	1	0.344	nsig	0.9	nRPLC	[M-H]-	Adenosine diphosphate ribose	HMDB0001178	C00301	3	NA
Single_Model	230.067	-0.0857281	0.105779	-0.810443	0.417686		Anova	model.00	4	85.494	94.252	-38.747	77.494	model.01	5	86.818	97.767	-38.409	76.818	0.6754	1	0.4112	nsig	11	nHILIC	[M-H]-	N2-Succinyl-L-glutamic acid 5-semialdehyde	HMDB0001180	C05932	3	NA
Single_Model	85.0647	-1.06312	0.54444	-1.95268	0.0508578		Anova	model.00	4	85.494	94.252	-38.747	77.494	model.01	5	83.088	94.037	-36.544	73.088	4.4054	1	0.03583	nsig	0.8	pRPLC	[M+H]+	Methyl propenyl ketone	HMDB0001184	NA	3	NA
Single_Model	399.144	0.353543	0.220244	1.60523	0.108443		Anova	model.00	4	85.494	94.252	-38.747	77.494	model.01	5	84.628	95.577	-37.314	74.628	2.8655	1	0.0905	nsig	14.2	pHILIC	[M+H]+	S-Adenosylmethionine (SAM)	HMDB0001185	C00019	2	0.832517
Single_Model	158.061	0.366931	0.745525	0.492178	0.622594		Anova	model.00	4	85.494	94.252	-38.747	77.494	model.01	5	87.243	98.192	-38.622	77.243	0.2504	1	0.6168	nsig	1.4	nRPLC	[M-H]-	Indoleacetaldehyde	HMDB0001190	C00637	2	0.821583
Single_Model	231.099	-0.115838	0.20781	-0.557422	0.577239		Anova	model.00	4	85.494	94.252	-38.747	77.494	model.01	5	87.164	98.113	-38.582	77.164	0.3295	1	0.566	nsig	8	nHILIC	[M-H]-	N2-Succinyl-L-ornithine	HMDB0001199	C03415	3	NA
Single_Model	444.031	0.234573	0.22906	1.02407	0.305802		Anova	model.00	4	85.494	94.252	-38.747	77.494	model.01	5	86.301	97.25	-38.151	76.301	1.1924	1	0.2749	nsig	11.4	pHILIC	[M+H]+	Guanosine diphosphate	HMDB0001201	C00035	3	NA
Single_Model	351.217	0.0296545	0.111605	0.265709	0.790463		Anova	model.00	4	85.494	94.252	-38.747	77.494	model.01	5	87.424	98.372	-38.712	77.424	0.0697	1	0.7918	nsig	8.3	nRPLC	[M-H]-	Prostaglandin E2	HMDB0001220	C00584	3	NA
Single_Model	333.207	0.0336451	0.231453	0.145365	0.884423		Anova	model.00	4	85.494	94.252	-38.747	77.494	model.01	5	87.473	98.421	-38.736	77.473	0.021	1	0.8848	nsig	1.1	nHILIC	[M-H]-	15-Keto-13,14-dihydroprostaglandin A2	HMDB0001244	NA	3	NA
Single_Model	784.149	0.0961271	0.0919988	1.04487	0.296082		Anova	model.00	4	85.494	94.252	-38.747	77.494	model.01	5	86.364	97.312	-38.182	76.364	1.1297	1	0.2878	nsig	6.3	nRPLC	[M-H]-	FAD	HMDB0001248	C00016	3	NA
Single_Model	146.165	-0.0724576	0.181908	-0.398321	0.690394		Anova	model.00	4	85.494	94.252	-38.747	77.494	model.01	5	87.334	98.283	-38.667	77.334	0.1594	1	0.6897	nsig	6.3	pHILIC	[M+H]+	Spermidine	HMDB0001257	C00315	3	NA
Single_Model	173.009	-0.244774	0.230142	-1.06357	0.287521		Anova	model.00	4	85.494	94.252	-38.747	77.494	model.01	5	86.319	97.267	-38.16	76.319	1.1746	1	0.2785	nsig	10.4	nHILIC	[M-H]-	Dehydroascorbic acid	HMDB0001264	C00425	1	0.847907
Single_Model	243.027	0.280603	0.201568	1.3921	0.163892		Anova	model.00	4	85.494	94.252	-38.747	77.494	model.01	5	85.451	96.399	-37.725	75.451	2.0433	1	0.1529	nsig	8.7	nHILIC	[M-H]-	Fucose 1-phosphate	HMDB0001265	C02985	3	NA
Single_Model	285.22	0.476612	0.333247	1.43021	0.152657		Anova	model.00	4	85.494	94.252	-38.747	77.494	model.01	5	85.44	96.388	-37.72	75.44	2.0541	1	0.1518	nsig	11.3	pRPLC	[M+H]+	Retinal	HMDB0001358	C00376	3	NA
Single_Model	362.05	0.246476	0.219477	1.12301	0.261431		Anova	model.00	4	85.494	94.252	-38.747	77.494	model.01	5	86.122	97.07	-38.061	76.122	1.3719	1	0.2415	nsig	12.7	nHILIC	[M-H]-	GMP	HMDB0001397	C00144	2	0.79491
Single_Model	123.055	0.20918	0.449946	0.464901	0.642002		Anova	model.00	4	85.494	94.252	-38.747	77.494	model.01	5	87.277	98.225	-38.639	77.277	0.2167	1	0.6416	nsig	1.1	pHILIC	[M+H]+	Niacinamide	HMDB0001406	C00153	1	0.829976
Single_Model	98.9841	0.700483	0.474682	1.47569	0.140028		Anova	model.00	4	85.494	94.252	-38.747	77.494	model.01	5	84.954	95.902	-37.477	74.954	2.5399	1	0.111	nsig	15	pHILIC	[M+H]+	Ortophosphate	HMDB0001429	C00009	2	0.772966
Single_Model	365.051	-0.172857	0.139806	-1.2364	0.216309		Anova	model.00	4	85.494	94.252	-38.747	77.494	model.01	5	85.778	96.726	-37.889	75.778	1.7163	1	0.1902	nsig	10	nHILIC	[M-H]-	Phosphoribosyl formamidocarboxamide	HMDB0001439	C04734	3	NA
Single_Model	277.144	0.0757763	0.191604	0.395483	0.692486		Anova	model.00	4	85.494	94.252	-38.747	77.494	model.01	5	87.332	98.28	-38.666	77.332	0.1619	1	0.6874	nsig	1.1	nHILIC	[M-H]-	alpha-CEHC	HMDB0001518	NA	3	NA
Single_Model	261.038	-0.594074	0.325213	-1.82672	0.0677417		Anova	model.00	4	85.494	94.252	-38.747	77.494	model.01	5	83.547	94.496	-36.774	73.547	3.9464	1	0.04697	nsig	4.3	nRPLC	[M-H]-	Mannitol 1-phosphate	HMDB0001530	C00644	3	NA
Single_Model	247.049	0.0751393	0.1226	0.612883	0.539954		Anova	model.00	4	85.494	94.252	-38.747	77.494	model.01	5	87.117	98.066	-38.559	77.117	0.3765	1	0.5395	nsig	0.6	nRPLC	[M-H]-	Pyridoxamine 5'-phosphate	HMDB0001555	C00647	3	NA
Single_Model	195.088	-0.00712302	0.254544	-0.0279835	0.977675		Anova	model.00	4	85.494	94.252	-38.747	77.494	model.01	5	87.493	98.441	-38.747	77.493	0.0008	1	0.9777	nsig	4.8	pHILIC	[M+H]+	Caffeine	HMDB0001847	C07481	1	NA
Single_Model	419.188	0.067107	0.170273	0.394113	0.693498		Anova	model.00	4	85.494	94.252	-38.747	77.494	model.01	5	87.337	98.285	-38.668	77.337	0.1569	1	0.6921	nsig	12.7	pHILIC	[M+H]+	Lofepramine	HMDB0001848	C07049	3	NA
Single_Model	150.056	-0.259346	0.237425	-1.09233	0.274688		Anova	model.00	4	85.494	94.252	-38.747	77.494	model.01	5	85.854	96.802	-37.927	75.854	1.6402	1	0.2003	nsig	2.9	nHILIC	[M-H]-	Acetominophen	HMDB0001859	C06804	2	0.804324
Single_Model	289.072	-0.0665644	0.212861	-0.312712	0.754499		Anova	model.00	4	85.494	94.252	-38.747	77.494	model.01	5	87.396	98.344	-38.698	77.396	0.0981	1	0.7542	nsig	6.1	nHILIC	[M-H]-	Epicatechin	HMDB0001871	C09727	3	NA
Single_Model	264.053	-0.152906	0.425739	-0.359155	0.719479		Anova	model.00	4	85.494	94.252	-38.747	77.494	model.01	5	87.363	98.311	-38.681	77.363	0.1311	1	0.7173	nsig	0.9	pRPLC	[M+H]+	Epinephrine sulfate	HMDB0001876	NA	3	NA
Single_Model	165.042	0.227284	0.191112	1.18927	0.234333		Anova	model.00	4	85.494	94.252	-38.747	77.494	model.01	5	85.971	96.92	-37.986	75.971	1.5225	1	0.2172	nsig	1.8	nHILIC	[M-H]-	3-Methylxanthine	HMDB0001886	C16357	2	0.675253
Single_Model	343.102	-0.163609	0.135708	-1.2056	0.227971		Anova	model.00	4	85.494	94.252	-38.747	77.494	model.01	5	85.933	96.881	-37.966	75.933	1.5608	1	0.2115	nsig	2.6	nHILIC	[M-H]-	Clotrimazole	HMDB0001922	C06922	3	NA
Single_Model	232.166	0.20941	0.197037	1.0628	0.287874		Anova	model.00	4	85.494	94.252	-38.747	77.494	model.01	5	86.213	97.161	-38.106	76.213	1.2809	1	0.2577	nsig	8.5	pHILIC	[M+H]+	Gamma-Aminobutyryl-lysine	HMDB0001959	NA	3	NA
Single_Model	301.217	-0.0591559	0.169786	-0.348414	0.727529		Anova	model.00	4	85.494	94.252	-38.747	77.494	model.01	5	87.372	98.321	-38.686	77.372	0.1216	1	0.7273	nsig	11.2	nRPLC	[M-H]-	C20:5 FA (Eicosapentanoic acid)	HMDB0001999	C06428	2	0.815292
Single_Model	249.113	-0.227494	0.254123	-0.895212	0.370673		Anova	model.00	4	85.494	94.252	-38.747	77.494	model.01	5	86.601	97.549	-38.3	76.601	0.893	1	0.3447	nsig	7.6	nRPLC	[M-H]-	Ubiquinone-1	HMDB0002012	C00399	3	NA
Single_Model	163.04	-0.165011	0.228484	-0.722199	0.470172		Anova	model.00	4	85.494	94.252	-38.747	77.494	model.01	5	86.957	97.906	-38.479	76.957	0.5363	1	0.464	nsig	2.4	nHILIC	[M-H]-	p-Coumaric acid	HMDB0002035	C00811	2	0.743305
Single_Model	82.9542	-0.268231	0.179428	-1.49493	0.134934		Anova	model.00	4	85.494	94.252	-38.747	77.494	model.01	5	85.146	96.094	-37.573	75.146	2.3481	1	0.1254	nsig	2.6	nHILIC	[M-H]-	Chloric acid	HMDB0002036	C01485	3	NA
Single_Model	235.119	-0.236944	0.43209	-0.548368	0.583439		Anova	model.00	4	85.494	94.252	-38.747	77.494	model.01	5	87.194	98.142	-38.597	77.194	0.3002	1	0.5838	nsig	1.8	pHILIC	[M+H]+	Cyclo(his-pro)	HMDB0002053	NA	3	NA
Single_Model	215.165	-0.279006	0.337824	-0.825893	0.408865		Anova	model.00	4	85.494	94.252	-38.747	77.494	model.01	5	86.808	97.756	-38.404	76.808	0.6859	1	0.4076	nsig	9.2	nRPLC	[M-H]-	C12:0, OH FA (Hydroxydodecanoic acid)	HMDB0002059	C08317	2	0.686281
Single_Model	131.118	0.376321	0.194028	1.93952	0.0524376		Anova	model.00	4	85.494	94.252	-38.747	77.494	model.01	5	83.275	94.223	-36.638	73.275	4.2188	1	0.03998	nsig	7.3	pHILIC	[M+H]+	N-Acetylputrescine	HMDB0002064	C02714	2	0.765308
Single_Model	129.019	-0.0801342	0.281705	-0.284461	0.776057		Anova	model.00	4	85.494	94.252	-38.747	77.494	model.01	5	87.412	98.361	-38.706	77.412	0.0813	1	0.7755	nsig	2.3	nHILIC	[M-H]-	Itaconic acid	HMDB0002092	C00490	1	0.711028
Single_Model	150.077	0.391773	0.244163	1.60456	0.108591		Anova	model.00	4	85.494	94.252	-38.747	77.494	model.01	5	84.693	95.641	-37.346	74.693	2.8009	1	0.09421	nsig	2	pHILIC	[M+H]+	6-Methyladenine	HMDB0002099	C08434	3	NA
Single_Model	165.019	-0.0240702	0.263968	-0.0911862	0.927345		Anova	model.00	4	85.494	94.252	-38.747	77.494	model.01	5	87.486	98.434	-38.743	77.486	0.0083	1	0.9274	nsig	6.2	nHILIC	[M-H]-	Phthalic acid	HMDB0002107	C01606	3	NA
Single_Model	220.028	0.330432	0.224729	1.47036	0.141465		Anova	model.00	4	85.494	94.252	-38.747	77.494	model.01	5	85.192	96.14	-37.596	75.192	2.302	1	0.1292	nsig	5.2	nHILIC	[M-H]-	S-(3-oxo-3-carboxy-n-propyl)cysteine	HMDB0002135	NA	3	NA
Single_Model	79.0211	0.0464737	0.131597	0.353153	0.723974		Anova	model.00	4	85.494	94.252	-38.747	77.494	model.01	5	87.368	98.316	-38.684	77.368	0.1256	1	0.723	nsig	0.5	pRPLC	[M+H]+	Dimethyl sulfoxide	HMDB0002151	C11143	3	NA
Single_Model	187.134	-0.694868	0.398619	-1.74319	0.0813005		Anova	model.00	4	85.494	94.252	-38.747	77.494	model.01	5	84.244	95.192	-37.122	74.244	3.2502	1	0.07142	nsig	8.4	nRPLC	[M-H]-	C10:0,OH FA (Hydroxycapric acid)	HMDB0002203	NA	2	0.721842
Single_Model	241.087	0.263885	0.145362	1.81537	0.0694669		Anova	model.00	4	85.494	94.252	-38.747	77.494	model.01	5	83.55	94.498	-36.775	73.55	3.9437	1	0.04705	nsig	2.4	nHILIC	[M-H]-	Equol	HMDB0002209	C14131	3	NA
Single_Model	149.096	-0.415098	0.383955	-1.08111	0.279647		Anova	model.00	4	85.494	94.252	-38.747	77.494	model.01	5	86.3	97.249	-38.15	76.3	1.1935	1	0.2746	nsig	8.8	pRPLC	[M+H]+	Cuminaldehyde	HMDB0002214	C06577	3	NA
Single_Model	260.125	0.076476	0.116689	0.655385	0.51222		Anova	model.00	4	85.494	94.252	-38.747	77.494	model.01	5	87.066	98.014	-38.533	77.066	0.4276	1	0.5132	nsig	13.2	nHILIC	[M-H]-	Gamma glutamyl ornithine	HMDB0002248	NA	3	NA
Single_Model	269.248	0.00503776	0.262942	0.0191592	0.984714		Anova	model.00	4	85.494	94.252	-38.747	77.494	model.01	5	87.493	98.442	-38.747	77.493	0.0004	1	0.9847	nsig	0.9	nHILIC	[M-H]-	C17:0 FA (Heptadecanoic acid)	HMDB0002259	NA	2	NA
Single_Model	366.139	0.0642115	0.16246	0.395246	0.692662		Anova	model.00	4	85.494	94.252	-38.747	77.494	model.01	5	87.338	98.287	-38.669	77.338	0.1556	1	0.6933	nsig	8.9	pHILIC	[M+H]+	2-(acetylamino)-1,5-anhydro-2-deoxy-3-O-b-D-galactopyranosyl-D-arabino-Hex-1-enitol	HMDB0002278	NA	3	NA
Single_Model	377.232	-0.0788458	0.177415	-0.444415	0.656742		Anova	model.00	4	85.494	94.252	-38.747	77.494	model.01	5	87.294	98.243	-38.647	77.294	0.1993	1	0.6553	nsig	2.2	pHILIC	[M+H]+	Resolvin D2	HMDB0002294	NA	3	NA
Single_Model	243.16	0.129754	0.122682	1.05765	0.290214		Anova	model.00	4	85.494	94.252	-38.747	77.494	model.01	5	86.375	97.323	-38.187	76.375	1.119	1	0.2901	nsig	9.3	nRPLC	[M-H]-	C13:0,DC FA (Tridecanedicarboxylic acid)	HMDB0002327	NA	2	0.759241
Single_Model	285.077	-0.151474	0.197784	-0.765856	0.443762		Anova	model.00	4	85.494	94.252	-38.747	77.494	model.01	5	86.877	97.825	-38.439	76.877	0.6168	1	0.4322	nsig	3.5	pRPLC	[M+H]+	Biochanin A	HMDB0002338	C00814	3	NA
Single_Model	349.202	0.24652	0.15425	1.59819	0.110002		Anova	model.00	4	85.494	94.252	-38.747	77.494	model.01	5	84.73	95.678	-37.365	74.73	2.7643	1	0.09639	nsig	9	nRPLC	[M-H]-	8-iso-15-keto-PGE2	HMDB0002341	NA	3	NA
Single_Model	237.184	0.0310521	0.137634	0.225614	0.821502		Anova	model.00	4	85.494	94.252	-38.747	77.494	model.01	5	87.443	98.391	-38.721	77.443	0.0511	1	0.8212	nsig	11	pHILIC	[M+H]+	Capsidiol	HMDB0002352	C09627	3	NA
Single_Model	159.066	0.11821	0.293727	0.40245	0.687353		Anova	model.00	4	85.494	94.252	-38.747	77.494	model.01	5	87.329	98.277	-38.664	77.329	0.165	1	0.6846	nsig	5.8	nHILIC	[M-H]-	3,3-Dimethylglutaric acid	HMDB0002441	NA	2	0.704512
Single_Model	581.118	-0.0452938	0.271966	-0.166542	0.867731		Anova	model.00	4	85.494	94.252	-38.747	77.494	model.01	5	87.466	98.414	-38.733	77.466	0.0278	1	0.8676	nsig	6	nRPLC	[M-H]-	D-Galacturonic acid	HMDB0002545	C08348	3	NA
Single_Model	512.267	0.00748975	0.120477	0.0621674	0.95043		Anova	model.00	4	85.494	94.252	-38.747	77.494	model.01	5	87.49	98.438	-38.745	77.49	0.0039	1	0.9505	nsig	9.9	nRPLC	[M-H]-	Sulfolithocholylglycine	HMDB0002639	C11301	3	NA
Single_Model	163.04	-0.528604	0.357044	-1.4805	0.138739		Anova	model.00	4	85.494	94.252	-38.747	77.494	model.01	5	84.879	95.828	-37.44	74.879	2.6144	1	0.1059	nsig	7.9	nHILIC	[M-H]-	2-Hydroxycinnamic acid	HMDB0002641	C01772	2	0.807319
Single_Model	361.198	-0.0189064	0.174314	-0.108462	0.913629		Anova	model.00	4	85.494	94.252	-38.747	77.494	model.01	5	87.482	98.43	-38.741	77.482	0.0118	1	0.9135	nsig	8.7	pHILIC	[M+H]+	Cortisone	HMDB0002802	C00762	2	0.760163
Single_Model	522.355	0.577538	0.344011	1.67884	0.0931836		Anova	model.00	4	85.494	94.252	-38.747	77.494	model.01	5	84.205	95.153	-37.103	74.205	3.2887	1	0.06976	nsig	6	pHILIC	[M+H]+	LysoPC(18:1)	HMDB0002815	C04230	2	0.664506
Single_Model	126.066	-0.192642	0.229238	-0.840356	0.400709		Anova	model.00	4	85.494	94.252	-38.747	77.494	model.01	5	86.755	97.704	-38.378	76.755	0.7383	1	0.3902	nsig	6.6	pHILIC	[M+H]+	5-Methylcytosine	HMDB0002894	C02376	2	0.800896
Single_Model	146.046	-0.363715	0.231991	-1.5678	0.116928		Anova	model.00	4	85.494	94.252	-38.747	77.494	model.01	5	84.486	95.434	-37.243	74.486	3.0083	1	0.08284	nsig	7.4	nHILIC	[M-H]-	N-Acetylserine	HMDB0002931	NA	1	NA
Single_Model	230.096	-0.147934	0.156399	-0.945877	0.344211		Anova	model.00	4	85.494	94.252	-38.747	77.494	model.01	5	86.532	97.48	-38.266	76.532	0.962	1	0.3267	nsig	11.2	pHILIC	[M+H]+	Ergothioneine	HMDB0003045	C05570	2	NA
Single_Model	277.217	-0.311319	0.216541	-1.43769	0.150521		Anova	model.00	4	85.494	94.252	-38.747	77.494	model.01	5	85.218	96.167	-37.609	75.218	2.2756	1	0.1314	nsig	11.2	nRPLC	[M-H]-	C18:3 FA (Linolenic acid)	HMDB0003073	C06426	2	0.750122
Single_Model	373.189	-0.257369	0.442253	-0.581949	0.560601		Anova	model.00	4	85.494	94.252	-38.747	77.494	model.01	5	87.146	98.094	-38.573	77.146	0.3479	1	0.5553	nsig	10	pRPLC	[M+H]+	Biocytin	HMDB0003134	C05552	3	NA
Single_Model	250.093	-0.247438	0.204991	-1.20707	0.227405		Anova	model.00	4	85.494	94.252	-38.747	77.494	model.01	5	85.818	96.767	-37.909	75.818	1.6756	1	0.1955	nsig	10.4	nHILIC	[M-H]-	Muramic acid	HMDB0003254	C06470	3	NA
Single_Model	255.065	0.534105	0.48499	1.10127	0.270779		Anova	model.00	4	85.494	94.252	-38.747	77.494	model.01	5	86.242	97.19	-38.121	76.242	1.252	1	0.2632	nsig	8.1	pHILIC	[M+H]+	Daidzein	HMDB0003312	C10208	3	NA
Single_Model	282.119	0.0432175	0.142053	0.304235	0.760949		Anova	model.00	4	85.494	94.252	-38.747	77.494	model.01	5	87.401	98.349	-38.701	77.401	0.0928	1	0.7606	nsig	6.9	pHILIC	[M+H]+	N1-Methyladenosine	HMDB0003331	C02494	1	0.819934
Single_Model	203.15	0.396471	0.467648	0.847798	0.39655		Anova	model.00	4	85.494	94.252	-38.747	77.494	model.01	5	86.751	97.699	-38.375	76.751	0.7432	1	0.3887	nsig	14.1	pHILIC	[M+H]+	Symmetric dimethylarginine	HMDB0003334	NA	1	0.863002
Single_Model	611.146	-0.0777845	0.145808	-0.533471	0.593707		Anova	model.00	4	85.494	94.252	-38.747	77.494	model.01	5	87.208	98.157	-38.604	77.208	0.2854	1	0.5932	nsig	12.5	nHILIC	[M-H]-	L-Glutathione oxidized	HMDB0003337	C00127	1	0.745448
Single_Model	118.086	-0.248172	0.308285	-0.805007	0.420816		Anova	model.00	4	85.494	94.252	-38.747	77.494	model.01	5	86.792	97.74	-38.396	76.792	0.702	1	0.4021	nsig	10.6	pHILIC	[M+H]+	5-Aminovaleric acid	HMDB0003355	C00431	2	0.812053
Single_Model	628.253	0.163617	0.2296	0.712618	0.476082		Anova	model.00	4	85.494	94.252	-38.747	77.494	model.01	5	86.996	97.945	-38.498	76.996	0.4973	1	0.4807	nsig	8.2	pRPLC	[M+H]+	Chitin	HMDB0003362	C00461	3	NA
Single_Model	146.092	-0.277341	0.233385	-1.18834	0.234699		Anova	model.00	4	85.494	94.252	-38.747	77.494	model.01	5	86.012	96.961	-38.006	76.012	1.4816	1	0.2235	nsig	9.6	pHILIC	[M+H]+	4-Guanidinobutanoic acid	HMDB0003464	C01035	1	0.760501
Single_Model	200.031	0.0665245	0.165562	0.401809	0.687824		Anova	model.00	4	85.494	94.252	-38.747	77.494	model.01	5	87.334	98.282	-38.667	77.334	0.1598	1	0.6894	nsig	4.6	pRPLC	[M+H]+	O-Phosphohomoserine	HMDB0003484	C01102	3	NA
Single_Model	215.139	-0.539459	0.399111	-1.35165	0.176487		Anova	model.00	4	85.494	94.252	-38.747	77.494	model.01	5	85.671	96.619	-37.835	75.671	1.8229	1	0.177	nsig	1.6	pHILIC	[M+H]+	Dethiobiotin	HMDB0003581	C01909	3	NA
Single_Model	325.114	-0.227017	0.181111	-1.25347	0.210036		Anova	model.00	4	85.494	94.252	-38.747	77.494	model.01	5	85.694	96.642	-37.847	75.694	1.8	1	0.1797	nsig	9.2	nHILIC	[M-H]-	6,7-Dimethyl-8-(1-D-ribityl)lumazine	HMDB0003826	C04332	3	NA
Single_Model	274.141	0.342993	0.232347	1.47621	0.139886		Anova	model.00	4	85.494	94.252	-38.747	77.494	model.01	5	84.996	95.944	-37.498	74.996	2.4976	1	0.114	nsig	8.1	nHILIC	[M-H]-	Epsilon-(gamma-Glutamyl)-lysine	HMDB0003869	NA	3	NA
Single_Model	111.055	-0.22903	0.231638	-0.988744	0.322789		Anova	model.00	4	85.494	94.252	-38.747	77.494	model.01	5	86.5	97.448	-38.25	76.5	0.9942	1	0.3187	nsig	1.7	pHILIC	[M+H]+	1-Acetylimidazole	HMDB0003905	C05130	2	0.79659
Single_Model	198.112	-0.344844	0.27263	-1.26488	0.205915		Anova	model.00	4	85.494	94.252	-38.747	77.494	model.01	5	85.678	96.626	-37.839	75.678	1.8161	1	0.1778	nsig	8.7	pHILIC	[M+H]+	Metanephrine	HMDB0004063	C05588	3	NA
Single_Model	589.301	0.111978	0.114792	0.975488	0.329318		Anova	model.00	4	85.494	94.252	-38.747	77.494	model.01	5	86.548	97.497	-38.274	76.548	0.9454	1	0.3309	nsig	7.1	nRPLC	[M-H]-	D-Urobilinogen	HMDB0004158	C05791	3	NA
Single_Model	125.071	-0.111371	0.243331	-0.457693	0.647173		Anova	model.00	4	85.494	94.252	-38.747	77.494	model.01	5	87.283	98.231	-38.641	77.283	0.2109	1	0.646	nsig	1.5	pHILIC	[M+H]+	Methylimidazole acetaldehyde	HMDB0004181	C05827	3	NA
Single_Model	247.072	0.0828443	0.105515	0.78514	0.432372		Anova	model.00	4	85.494	94.252	-38.747	77.494	model.01	5	86.863	97.811	-38.432	76.863	0.6307	1	0.4271	nsig	5.7	nHILIC	[M-H]-	5-Hydroxyindoleacetylglycine	HMDB0004185	C05832	3	NA
[truncated: 633 more rows]

## Sheet: List_BD
Glmer_status	MZ	Estimate	Std.Error	zvalue	Pr(>|z|)		Anova_model00	npar	AIC	BIC	logLik	deviance	Anova_model.01	npar	AIC	BIC	logLik	deviance	Chisq	Df	Pr(>Chisq)	Significant status considered	RT	Mode	Adduct	Metabolite	HMDB	KEGG	MSI_level	Total_Score
[truncated: 1,157 more rows]
