# Supplementary material for: Multi-omic Analysis of Familial Adenomatous Polyposis Reveals Molecular Pathways and Polyclonal Spreading Associated with Early Tumorigenesis
Source: Research Square preprint supplement (doi:10.21203/rs.3.rs-515393/v1), 2021-05-19
Supplement: Supplementary file 7 [file efcea04cd5dc8ed928965ae4.xlsx]

## Sheet: Sheet1
Pattern	RNA-seq		Proteomics		Metabolomics		Lipidomics
	Increasing	Decreasing	Increasing	Decreasing	Increasing	Decreasing	Increasing	Decreasing
Pattern 1	1	2	0	0	0	0	0	0
Pattern 2	3	0	0	0	0	0	0	5
Pattern 3	40	39	0	0	0	0	0	0
Pattern 4	3	14	0	0	0	0	0	0
Pattern 5	45	119	154	371	71	47	10	363
Pattern 6	5	5	0	0	22	38	4	22
Pattern 7	539	356	0	0	0	0	0	0
