# Supplementary material for: Multi-omic Analysis of Familial Adenomatous Polyposis Reveals Molecular Pathways and Polyclonal Spreading Associated with Early Tumorigenesis
Source: Research Square preprint supplement (doi:10.21203/rs.3.rs-515393/v1), 2021-05-19
Supplement: Supplementary file 8 [file 289ba57e9539f4d139b7489b.xlsx]

## Sheet: List_MB
Glmer_status	lipidSpecies	Estimate	Std.Error	zvalue	Pr(>|z|)		Glmer_Anova	Anova_model00	npar	AIC	BIC	logLik	deviance	Anova_model.01	npar	AIC	BIC	logLik	deviance	Chisq	Df	Pr(>Chisq)	Significant status considered	HMDB
Single_Model	CE(20:0)	1.00276	0.71708	1.39839	0.161996		Anova	model.00	4	40.544	46.649	-16.272	32.544	model.01	5	39.95	47.582	-14.975	29.95	2.5938	1	0.1073	nsig	HMDB06740
Single_Model	CE(20:1)	1.48517	0.876651	1.69414	0.0902395		Anova	model.00	4	40.544	46.649	-16.272	32.544	model.01	5	38.973	46.605	-14.487	28.973	3.5705	1	0.05881	nsig	HMDB05193
Single_Model	CE(20:3)	1.00496	0.722229	1.39146	0.164085		Anova	model.00	4	40.544	46.649	-16.272	32.544	model.01	5	40.479	48.111	-15.239	30.479	2.0646	1	0.1508	nsig	HMDB06736
Single_Model	CE(20:4)	-0.66794	0.86491	-0.772265	0.439958		Anova	model.00	4	40.544	46.649	-16.272	32.544	model.01	5	41.922	49.554	-15.961	31.922	0.6212	1	0.4306	nsig	HMDB06726
Single_Model	CE(20:5)	0.0828435	0.72212	0.114723	0.908665		Anova	model.00	4	40.544	46.649	-16.272	32.544	model.01	5	42.53	50.162	-16.265	32.53	0.0133	1	0.9081	nsig	HMDB06731
Single_Model	CE(22:1)	1.49635	0.737903	2.02785	0.0425758		Anova	model.00	4	40.544	46.649	-16.272	32.544	model.01	5	36.464	44.096	-13.232	26.464	6.0799	1	0.01367	sig	HMDB10372
Single_Model	CE(22:2)	1.82775	0.74437	2.45544	0.0140713		Anova	model.00	4	40.544	46.649	-16.272	32.544	model.01	5	35.09	42.721	-12.545	25.09	7.4542	1	0.006329	sig	HMDB06737
Single_Model	CE(24:0)	0.517783	0.454616	1.13894	0.254726		Anova	model.00	4	40.544	46.649	-16.272	32.544	model.01	5	41.215	48.847	-15.607	31.215	1.3289	1	0.249	nsig	HMDB10376
Single_Model	CER(20:0)	-5.26775	2.3795	-2.21381	0.026842		Anova	model.00	4	40.544	46.649	-16.272	32.544	model.01	5	33.439	41.071	-11.72	23.439	9.1045	1	0.00255	sig	HMDB04951
Single_Model	CER(22:0)	0.802026	1.69387	0.473486	0.635867		Anova	model.00	4	40.544	46.649	-16.272	32.544	model.01	5	42.303	49.935	-16.151	32.303	0.2406	1	0.6238	nsig	HMDB04952
Single_Model	DAG(14:0/16:0)	-1.21763	0.600895	-2.02637	0.0427273		Anova	model.00	4	40.544	46.649	-16.272	32.544	model.01	5	36.976	44.608	-13.488	26.976	5.5677	1	0.01829	sig	HMDB07095
Single_Model	DAG(14:0/18:1)	-1.50566	0.673215	-2.23652	0.0253175		Anova	model.00	4	40.544	46.649	-16.272	32.544	model.01	5	33.987	41.619	-11.994	23.987	8.5562	1	0.003444	sig	HMDB07015
Single_Model	DAG(14:0/18:2)	-0.707282	0.536161	-1.31916	0.187116		Anova	model.00	4	40.544	46.649	-16.272	32.544	model.01	5	40.61	48.241	-15.305	30.61	1.9341	1	0.1643	nsig	HMDB07016
Single_Model	DAG(16:0/16:0)	-0.961429	0.653055	-1.4722	0.140966		Anova	model.00	4	40.544	46.649	-16.272	32.544	model.01	5	40.154	47.786	-15.077	30.154	2.3893	1	0.1222	nsig	HMDB07098
Single_Model	DAG(16:0/16:1)	-1.12816	0.635162	-1.77618	0.0757027		Anova	model.00	4	40.544	46.649	-16.272	32.544	model.01	5	37.823	45.455	-13.912	27.823	4.7204	1	0.02981	nsig	HMDB07099
Single_Model	DAG(16:0/18:0)	-1.20148	0.80196	-1.49818	0.134087		Anova	model.00	4	40.544	46.649	-16.272	32.544	model.01	5	39.797	47.428	-14.898	29.797	2.7471	1	0.09743	nsig	HMDB07100
Single_Model	DAG(16:0/18:1)	-2.02144	1.33613	-1.51291	0.130301		Anova	model.00	4	40.544	46.649	-16.272	32.544	model.01	5	38.347	45.979	-14.174	28.347	4.1962	1	0.04051	nsig	HMDB07102
Single_Model	DAG(16:0/18:2)	0.206585	0.952757	0.216829	0.828342		Anova	model.00	4	40.544	46.649	-16.272	32.544	model.01	5	42.496	50.127	-16.248	32.496	0.0481	1	0.8264	nsig	HMDB07103
Single_Model	DAG(16:0/18:3)	-1.5348	0.751466	-2.04241	0.0411112		Anova	model.00	4	40.544	46.649	-16.272	32.544	model.01	5	36.541	44.172	-13.27	26.541	6.003	1	0.01428	sig	HMDB07105
Single_Model	DAG(16:0/22:5)	-0.424712	0.535597	-0.792968	0.427796		Anova	model.00	4	40.544	46.649	-16.272	32.544	model.01	5	41.847	49.479	-15.924	31.847	0.6962	1	0.4041	nsig	HMDB07120
Single_Model	DAG(16:1/18:1)	-1.28202	0.655171	-1.95677	0.0503746		Anova	model.00	4	40.544	46.649	-16.272	32.544	model.01	5	34.755	42.386	-12.377	24.755	7.7891	1	0.005256	nsig	HMDB07131
Single_Model	DAG(16:1/18:2)	-1.02615	0.578775	-1.77298	0.0762326		Anova	model.00	4	40.544	46.649	-16.272	32.544	model.01	5	38.367	45.999	-14.184	28.367	4.1765	1	0.04099	nsig	HMDB07132
Single_Model	DAG(18:0/18:1)	-6.33549	3.9144	-1.61851	0.105553		Anova	model.00	4	40.544	46.649	-16.272	32.544	model.01	5	32.786	40.418	-11.393	22.786	9.7575	1	0.001786	nsig	HMDB07160
Single_Model	DAG(18:1/18:1)	-1.94239	1.10593	-1.75634	0.0790296		Anova	model.00	4	40.544	46.649	-16.272	32.544	model.01	5	35.958	43.59	-12.979	25.958	6.5859	1	0.01028	nsig	HMDB07218
Single_Model	DAG(18:1/18:2)	-0.703365	0.773469	-0.909365	0.363158		Anova	model.00	4	40.544	46.649	-16.272	32.544	model.01	5	41.596	49.228	-15.798	31.596	0.9476	1	0.3303	nsig	HMDB07219
Single_Model	DAG(18:2/20:4)	0.00026921	0.798744	0.000337042	0.999731		Anova	model.00	4	40.544	46.649	-16.272	32.544	model.01	5	42.544	50.175	-16.272	32.544	0	1	1	nsig	HMDB07257
Single_Model	DAG(20:0/20:0)	-0.385445	0.618791	-0.6229	0.53335		Anova	model.00	4	40.544	46.649	-16.272	32.544	model.01	5	42.128	49.76	-16.064	32.128	0.4159	1	0.519	nsig	HMDB07368
Single_Model	FFA(14:0)	-0.989442	0.764663	-1.29396	0.19568		Anova	model.00	4	40.544	46.649	-16.272	32.544	model.01	5	40.652	48.284	-15.326	30.652	1.8912	1	0.1691	nsig	HMDB00806
Single_Model	FFA(15:0)	-0.939905	0.727215	-1.29247	0.196194		Anova	model.00	4	40.544	46.649	-16.272	32.544	model.01	5	40.695	48.327	-15.347	30.695	1.8488	1	0.1739	nsig	HMDB00826
Single_Model	FFA(16:0)	-0.912686	0.789548	-1.15596	0.247698		Anova	model.00	4	40.544	46.649	-16.272	32.544	model.01	5	41.133	48.764	-15.566	31.133	1.4111	1	0.2349	nsig	HMDB00220
Single_Model	FFA(16:1)	-1.00678	1.12802	-0.892518	0.372115		Anova	model.00	4	40.544	46.649	-16.272	32.544	model.01	5	41.681	49.312	-15.84	31.681	0.8631	1	0.3529	nsig	HMDB03229
Single_Model	FFA(17:0)	-0.691631	0.716287	-0.965578	0.334255		Anova	model.00	4	40.544	46.649	-16.272	32.544	model.01	5	41.579	49.211	-15.789	31.579	0.9648	1	0.326	nsig	HMDB02259
Single_Model	FFA(18:0)	-0.96573	0.628323	-1.537	0.124294		Anova	model.00	4	40.544	46.649	-16.272	32.544	model.01	5	39.934	47.565	-14.967	29.934	2.61	1	0.1062	nsig	HMDB00827
Single_Model	FFA(18:1)	-1.45462	1.14744	-1.2677	0.204904		Anova	model.00	4	40.544	46.649	-16.272	32.544	model.01	5	40.579	48.211	-15.29	30.579	1.9646	1	0.161	nsig	HMDB00207
Single_Model	FFA(18:2)	0.965794	1.38192	0.698878	0.484628		Anova	model.00	4	40.544	46.649	-16.272	32.544	model.01	5	42.076	49.708	-16.038	32.076	0.4676	1	0.4941	nsig	HMDB00673
Single_Model	FFA(18:3)	-1.05779	0.81426	-1.29908	0.193916		Anova	model.00	4	40.544	46.649	-16.272	32.544	model.01	5	40.682	48.314	-15.341	30.682	1.8619	1	0.1724	nsig	HMDB01388
Single_Model	FFA(18:4)	-1.00372	0.560817	-1.78974	0.0734956		Anova	model.00	4	40.544	46.649	-16.272	32.544	model.01	5	38.571	46.203	-14.286	28.571	3.9727	1	0.04624	nsig	HMDB06547
Single_Model	FFA(20:0)	-1.00172	0.623848	-1.60572	0.108336		Anova	model.00	4	40.544	46.649	-16.272	32.544	model.01	5	39.641	47.273	-14.82	29.641	2.9029	1	0.08842	nsig	HMDB02212
Single_Model	FFA(22:0)	-0.879037	0.751701	-1.1694	0.242244		Anova	model.00	4	40.544	46.649	-16.272	32.544	model.01	5	41.063	48.695	-15.532	31.063	1.4802	1	0.2237	nsig	HMDB00944
Single_Model	FFA(22:4)	-0.46232	0.0601535	-7.68568	1.52e-14		Anova	model.00	4	40.544	46.649	-16.272	32.544	model.01	5	42.442	50.074	-16.221	32.442	0.1013	1	0.7502	nsig	HMDB02226
Single_Model	HCER(18:0)	-1.27922	1.01134	-1.26487	0.205918		Anova	model.00	4	40.544	46.649	-16.272	32.544	model.01	5	40.896	48.528	-15.448	30.896	1.6476	1	0.1993	nsig	HMDB04972
Single_Model	HCER(20:0)	-1.76922	1.17962	-1.49982	0.133661		Anova	model.00	4	40.544	46.649	-16.272	32.544	model.01	5	40.012	47.644	-15.006	30.012	2.5314	1	0.1116	nsig	HMDB04973
Single_Model	LCER(24:1)	4.07789	1.66903	2.44327	0.014555		Anova	model.00	4	40.544	46.649	-16.2718	32.544	model.01	5	25.632	33.264	-7.8162	15.632	16.911	1	3.917e-05	sig	HMDB04872
Single_Model	LPC(15:0)	2.25452	0.997581	2.25999	0.0238218		Anova	model.00	4	40.544	46.649	-16.272	32.544	model.01	5	34.836	42.468	-12.418	24.836	7.7072	1	0.0055	sig	HMDB10381
Single_Model	LPC(16:0)	2.94097	1.33792	2.19816	0.0279379		Anova	model.00	4	40.544	46.649	-16.272	32.544	model.01	5	34.848	42.479	-12.424	24.848	7.6961	1	0.005534	sig	HMDB10382
Single_Model	LPC(16:1)	3.16457	1.05617	2.99627	0.00273303		Anova	model.00	4	40.544	46.649	-16.272	32.544	model.01	5	33.952	41.584	-11.976	23.952	8.5914	1	0.003378	sig	HMDB10383
Single_Model	LPC(17:0)	2.03899	0.965809	2.11118	0.0347571		Anova	model.00	4	40.544	46.649	-16.272	32.544	model.01	5	36.063	43.695	-13.031	26.063	6.4806	1	0.01091	sig	0
Single_Model	LPC(18:0)	2.55508	1.40677	1.81628	0.0693281		Anova	model.00	4	40.544	46.649	-16.272	32.544	model.01	5	38.379	46.011	-14.189	28.379	4.1649	1	0.04127	nsig	HMDB10384
Single_Model	LPC(18:1)	2.17397	1.13878	1.90903	0.0562585		Anova	model.00	4	40.544	46.649	-16.272	32.544	model.01	5	38.068	45.699	-14.034	28.068	4.4761	1	0.03437	nsig	0
Single_Model	LPC(18:2)	3.56114	1.45183	2.45286	0.0141726		Anova	model.00	4	40.544	46.649	-16.272	32.544	model.01	5	34.249	41.881	-12.125	24.249	8.2945	1	0.003977	sig	0
Single_Model	LPC(20:3)	1.51811	1.20176	1.26324	0.206503		Anova	model.00	4	40.544	46.649	-16.272	32.544	model.01	5	40.737	48.369	-15.369	30.737	1.8065	1	0.1789	nsig	HMDB10394
Single_Model	LPC(20:4)	-0.698884	1.37173	-0.509492	0.610408		Anova	model.00	4	40.544	46.649	-16.272	32.544	model.01	5	42.275	49.907	-16.137	32.275	0.2688	1	0.6041	nsig	HMDB10395
Single_Model	LPE(16:0)	2.53721	1.16376	2.18018	0.0292442		Anova	model.00	4	40.544	46.649	-16.272	32.544	model.01	5	36.224	43.856	-13.112	26.224	6.3193	1	0.01194	sig	HMDB11503
Single_Model	LPE(18:0)	2.84054	1.2805	2.2183	0.0265344		Anova	model.00	4	40.544	46.649	-16.272	32.544	model.01	5	36.958	44.59	-13.479	26.958	5.5856	1	0.01811	sig	HMDB11130
Single_Model	LPE(18:1)	4.92901	1.81504	2.71565	0.00661455		Anova	model.00	4	40.544	46.649	-16.272	32.544	model.01	5	30.478	38.11	-10.239	20.478	12.066	1	0.0005136	sig	HMDB11476
Single_Model	LPE(18:2)	6.13028	3.1308	1.95805	0.0502237		Anova	model.00	4	40.544	46.649	-16.272	32.544	model.01	5	34.681	42.313	-12.341	24.681	7.8626	1	0.005047	nsig	HMDB11477
Single_Model	LPE(20:3)	1.73163	1.04966	1.6497	0.0990038		Anova	model.00	4	40.544	46.649	-16.272	32.544	model.01	5	39.286	46.918	-14.643	29.286	3.2577	1	0.07109	nsig	HMDB11486
Single_Model	LPE(20:4)	3.48337	0.01588	219.356	0		Anova	model.00	4	40.544	46.649	-16.272	32.544	model.01	5	38.59	46.222	-14.295	28.59	3.9538	1	0.04676	sig	HMDB11487
Single_Model	PC(16:0/14:0)	8.50474	4.36891	1.94665	0.0515767		Anova	model.00	4	40.544	46.649	-16.2718	32.544	model.01	5	23.334	30.966	-6.6671	13.334	19.209	1	1.171e-05	nsig	HMDB07965
Single_Model	PC(16:0/16:0)	0.557941	1.4108	0.395477	0.692491		Anova	model.00	4	40.544	46.649	-16.272	32.544	model.01	5	42.383	50.014	-16.191	32.383	0.1611	1	0.6881	nsig	HMDB00564
Single_Model	PC(16:0/16:1)	3.87281	1.52165	2.54514	0.0109235		Anova	model.00	4	40.544	46.649	-16.2718	32.544	model.01	5	29.883	37.515	-9.9416	19.883	12.66	1	0.0003735	sig	HMDB07969
Single_Model	PC(16:0/18:1)	9.68825	0.0109946	881.181	0		Anova	model.00	4	40.544	46.649	-16.272	32.544	model.01	5	33.317	40.949	-11.659	23.317	9.2264	1	0.002385	sig	HMDB07972
Single_Model	PC(16:0/18:3)	1.40339	1.34708	1.0418	0.297506		Anova	model.00	4	40.544	46.649	-16.272	32.544	model.01	5	41.276	48.908	-15.638	31.276	1.2677	1	0.2602	nsig	HMDB07975
Single_Model	PC(16:0/20:1)	1.66583	1.46299	1.13865	0.254848		Anova	model.00	4	40.544	46.649	-16.272	32.544	model.01	5	40.901	48.533	-15.45	30.901	1.6429	1	0.1999	nsig	HMDB07978
Single_Model	PC(16:0/20:2)	3.13625	1.9121	1.64021	0.100961		Anova	model.00	4	40.544	46.649	-16.272	32.544	model.01	5	38.043	45.675	-14.021	28.043	4.5007	1	0.03388	nsig	HMDB07979
Single_Model	PC(16:0/20:3)	1.26916	1.58234	0.802081	0.422506		Anova	model.00	4	40.544	46.649	-16.272	32.544	model.01	5	41.77	49.402	-15.885	31.77	0.7739	1	0.379	nsig	HMDB07981
Single_Model	PC(16:0/20:4)	-0.391572	1.24123	-0.315472	0.752403		Anova	model.00	4	40.544	46.649	-16.272	32.544	model.01	5	42.446	50.078	-16.223	32.446	0.0972	1	0.7552	nsig	HMDB07982
Single_Model	PC(16:0/20:5)	0.2706	0.580846	0.465872	0.641307		Anova	model.00	4	40.544	46.649	-16.272	32.544	model.01	5	42.315	49.947	-16.157	32.315	0.2286	1	0.6326	nsig	HMDB07984
Single_Model	PC(16:0/22:4)	0.624607	1.18797	0.525778	0.599042		Anova	model.00	4	40.544	46.649	-16.272	32.544	model.01	5	42.236	49.868	-16.118	32.236	0.3077	1	0.5791	nsig	HMDB07988
Single_Model	PC(16:0/22:5)	1.19494	1.3395	0.892074	0.372353		Anova	model.00	4	40.544	46.649	-16.272	32.544	model.01	5	41.597	49.229	-15.798	31.597	0.9468	1	0.3305	nsig	HMDB07990
Single_Model	PC(16:0/22:6)	11.879	0.0111939	1061.21	0		Anova	model.00	4	40.544	46.649	-16.272	32.544	model.01	5	27.284	34.916	-8.642	17.284	15.26	1	9.37e-05	sig	HMDB07991
Single_Model	PC(17:0/18:1)	3.66556	2.06144	1.77815	0.0753788		Anova	model.00	4	40.544	46.649	-16.272	32.544	model.01	5	35.852	43.484	-12.926	25.852	6.6913	1	0.009688	nsig	0
Single_Model	PC(17:0/18:2)	3.7209	1.92471	1.93323	0.0532078		Anova	model.00	4	40.544	46.649	-16.272	32.544	model.01	5	35.949	43.581	-12.975	25.949	6.5943	1	0.01023	nsig	0
Single_Model	PC(17:0/20:4)	0.365865	0.486079	0.752686	0.451639		Anova	model.00	4	40.544	46.649	-16.272	32.544	model.01	5	41.928	49.56	-15.964	31.928	0.6155	1	0.4327	nsig	0
Single_Model	PC(18:0/16:1)	2.47626	1.28841	1.92195	0.0546115		Anova	model.00	4	40.544	46.649	-16.272	32.544	model.01	5	38.008	45.64	-14.004	28.008	4.5354	1	0.0332	nsig	HMDB08035
Single_Model	PC(18:0/18:0)	-0.871115	1.55448	-0.56039	0.575214		Anova	model.00	4	40.544	46.649	-16.272	32.544	model.01	5	42.238	49.869	-16.119	32.238	0.306	1	0.5801	nsig	HMDB08036
Single_Model	PC(18:0/18:1)	1.16103	1.56263	0.742995	0.457485		Anova	model.00	4	40.544	46.649	-16.272	32.544	model.01	5	41.921	49.553	-15.961	31.921	0.6224	1	0.4302	nsig	HMDB08038
Single_Model	PC(18:0/18:2)	2.60547	2.03428	1.28078	0.20027		Anova	model.00	4	40.544	46.649	-16.272	32.544	model.01	5	40.393	48.025	-15.197	30.393	2.1503	1	0.1425	nsig	HMDB08039
Single_Model	PC(18:0/18:3)	-0.117025	1.07912	-0.108445	0.913643		Anova	model.00	4	40.544	46.649	-16.272	32.544	model.01	5	42.532	50.164	-16.266	32.532	0.0118	1	0.9136	nsig	HMDB08040
Single_Model	PC(18:0/20:2)	0.563594	0.998455	0.564466	0.572437		Anova	model.00	4	40.544	46.649	-16.272	32.544	model.01	5	42.171	49.803	-16.085	32.171	0.3727	1	0.5415	nsig	HMDB08045
Single_Model	PC(18:0/20:3)	-1.17318	1.17352	-0.999709	0.317451		Anova	model.00	4	40.544	46.649	-16.272	32.544	model.01	5	41.586	49.218	-15.793	31.586	0.9575	1	0.3278	nsig	HMDB08047
Single_Model	PC(18:0/20:4)	-2.11415	1.12643	-1.87687	0.0605363		Anova	model.00	4	40.544	46.649	-16.272	32.544	model.01	5	38.947	46.579	-14.473	28.947	3.5969	1	0.05789	nsig	HMDB08048
Single_Model	PC(18:0/22:4)	0.219758	0.541793	0.405612	0.685027		Anova	model.00	4	40.544	46.649	-16.272	32.544	model.01	5	42.376	50.008	-16.188	32.376	0.1679	1	0.682	nsig	HMDB08054
Single_Model	PC(18:0/22:5)	0.831841	0.659634	1.26107	0.207285		Anova	model.00	4	40.544	46.649	-16.272	32.544	model.01	5	40.499	48.131	-15.25	30.499	2.0445	1	0.1528	nsig	HMDB08056
Single_Model	PC(18:1/16:1)	3.01713	1.45764	2.06987	0.0384645		Anova	model.00	4	40.544	46.649	-16.272	32.544	model.01	5	35.783	43.415	-12.892	25.783	6.7605	1	0.00932	sig	HMDB08101
Single_Model	PC(18:1/18:1)	1.07489	1.43185	0.750698	0.452835		Anova	model.00	4	40.544	46.649	-16.272	32.544	model.01	5	41.917	49.549	-15.959	31.917	0.6264	1	0.4287	nsig	HMDB00593
Single_Model	PC(18:1/18:2)	2.28057	1.67425	1.36214	0.173154		Anova	model.00	4	40.544	46.649	-16.272	32.544	model.01	5	40.114	47.746	-15.057	30.114	2.4298	1	0.119	nsig	HMDB08105
Single_Model	PC(18:1/18:3)	-0.256305	0.774912	-0.330754	0.74083		Anova	model.00	4	40.544	46.649	-16.272	32.544	model.01	5	42.433	50.065	-16.216	32.433	0.1106	1	0.7394	nsig	HMDB08107
Single_Model	PC(18:1/20:2)	1.4262	1.36411	1.04552	0.295783		Anova	model.00	4	40.544	46.649	-16.272	32.544	model.01	5	40.779	48.411	-15.39	30.779	1.7645	1	0.1841	nsig	HMDB08111
Single_Model	PC(18:1/20:3)	1.14249	1.46492	0.7799	0.43545		Anova	model.00	4	40.544	46.649	-16.272	32.544	model.01	5	41.827	49.458	-15.913	31.827	0.7171	1	0.3971	nsig	HMDB08113
Single_Model	PC(18:1/20:4)	-0.908444	1.36121	-0.667381	0.504529		Anova	model.00	4	40.544	46.649	-16.272	32.544	model.01	5	42.127	49.758	-16.063	32.127	0.417	1	0.5185	nsig	HMDB08114
Single_Model	PC(18:1/22:6)	4.61006	2.55588	1.80371	0.0712771		Anova	model.00	4	40.544	46.649	-16.272	32.544	model.01	5	32.116	39.748	-11.058	22.116	10.428	1	0.001241	nsig	HMDB08123
Single_Model	PC(18:2/16:1)	4.99579	2.18482	2.2866	0.0222195		Anova	model.00	4	40.544	46.649	-16.272	32.544	model.01	5	32.43	40.062	-11.215	22.43	10.113	1	0.001472	sig	HMDB08134
Single_Model	PC(18:2/20:1)	1.88711	1.50858	1.25092	0.210965		Anova	model.00	4	40.544	46.649	-16.272	32.544	model.01	5	40.608	48.24	-15.304	30.608	1.9355	1	0.1642	nsig	HMDB08144
Single_Model	PC(18:2/20:2)	7.77408	3.49876	2.22196	0.0262863		Anova	model.00	4	40.544	46.649	-16.2718	32.544	model.01	5	29.106	36.738	-9.5531	19.106	13.437	1	0.0002467	sig	HMDB08145
Single_Model	PC(18:2/20:3)	11.8239	6.85989	1.72363	0.0847743		Anova	model.00	4	40.544	46.649	-16.272	32.544	model.01	5	30.708	38.34	-10.354	20.708	11.835	1	0.0005812	nsig	HMDB08146
Single_Model	PC(18:2/20:4)	3.43793	2.10029	1.63688	0.101656		Anova	model.00	4	40.544	46.649	-16.272	32.544	model.01	5	38.239	45.87	-14.119	28.239	4.305	1	0.038	nsig	HMDB08147
Single_Model	PC(20:0/18:1)	1.65475	1.03141	1.60435	0.108637		Anova	model.00	4	40.544	46.649	-16.272	32.544	model.01	5	38.084	45.716	-14.042	28.084	4.4595	1	0.03471	nsig	HMDB08269
Single_Model	PC(20:0/18:2)	5.3344	2.7542	1.93682	0.0527673		Anova	model.00	4	40.544	46.649	-16.272	32.544	model.01	5	34.778	42.409	-12.389	24.778	7.7661	1	0.005324	nsig	HMDB08270
Single_Model	PE(16:0/18:1)	5.42058	3.14119	1.72564	0.0844115		Anova	model.00	4	40.544	46.649	-16.272	32.544	model.01	5	34.327	41.958	-12.163	24.327	8.2171	1	0.00415	nsig	HMDB08927
Single_Model	PE(16:0/20:4)	0.855411	1.08586	0.78777	0.430831		Anova	model.00	4	40.544	46.649	-16.272	32.544	model.01	5	41.87	49.502	-15.935	31.87	0.6733	1	0.4119	nsig	HMDB08937
Single_Model	PE(16:0/22:6)	0.59527	1.1138	0.534449	0.593031		Anova	model.00	4	40.544	46.649	-16.272	32.544	model.01	5	42.23	49.862	-16.115	32.23	0.3134	1	0.5756	nsig	HMDB08946
Single_Model	PE(18:0/18:0)	6.46746	3.40524	1.89927	0.0575296		Anova	model.00	4	40.544	46.649	-16.272	32.544	model.01	5	30.468	38.099	-10.234	20.468	12.076	1	0.0005107	nsig	HMDB08991
Single_Model	PE(18:0/20:3)	-0.301598	0.709594	-0.425029	0.670816		Anova	model.00	4	40.544	46.649	-16.272	32.544	model.01	5	42.361	49.993	-16.18	32.361	0.1828	1	0.6689	nsig	HMDB11382
Single_Model	PE(18:0/20:4)	0.111339	0.998243	0.111535	0.911192		Anova	model.00	4	40.544	46.649	-16.272	32.544	model.01	5	42.531	50.163	-16.266	32.531	0.0125	1	0.9109	nsig	HMDB09003
Single_Model	PE(18:0/22:4)	-0.910808	1.03727	-0.878083	0.379899		Anova	model.00	4	40.544	46.649	-16.272	32.544	model.01	5	41.776	49.407	-15.888	31.776	0.768	1	0.3808	nsig	HMDB09009
Single_Model	PE(18:0/22:6)	1.38515	1.11722	1.23981	0.215044		Anova	model.00	4	40.544	46.649	-16.272	32.544	model.01	5	40.426	48.058	-15.213	30.426	2.1179	1	0.1456	nsig	HMDB09012
Single_Model	PE(18:1/18:1)	3.62546	2.11745	1.71218	0.0868634		Anova	model.00	4	40.544	46.649	-16.272	32.544	model.01	5	36.291	43.923	-13.146	26.291	6.2524	1	0.0124	nsig	HMDB09059
Single_Model	PE(18:1/20:4)	1.59497	1.30644	1.22085	0.222143		Anova	model.00	4	40.544	46.649	-16.272	32.544	model.01	5	40.715	48.347	-15.357	30.715	1.8289	1	0.1763	nsig	HMDB09069
Single_Model	PE(O-16:0/18:1)	5.1206	0.0167691	305.359	0		Anova	model.00	4	40.544	46.649	-16.272	32.544	model.01	5	35.335	42.967	-12.668	25.335	7.2084	1	0.007256	sig	HMDB11157
Single_Model	PE(O-16:0/20:4)	0.534033	0.976139	0.547088	0.584318		Anova	model.00	4	40.544	46.649	-16.272	32.544	model.01	5	42.23	49.862	-16.115	32.23	0.3134	1	0.5756	nsig	0
Single_Model	PE(O-18:0/18:1)	2.07066	1.35066	1.53307	0.125257		Anova	model.00	4	40.544	46.649	-16.272	32.544	model.01	5	38.986	46.618	-14.493	28.986	3.5573	1	0.05928	nsig	0
Single_Model	PE(O-18:0/18:2)	0.291537	0.857202	0.340103	0.733779		Anova	model.00	4	40.544	46.649	-16.272	32.544	model.01	5	42.427	50.059	-16.214	32.427	0.1163	1	0.733	nsig	0
Single_Model	PE(O-18:0/20:4)	-0.743348	0.87433	-0.850192	0.395219		Anova	model.00	4	40.544	46.649	-16.272	32.544	model.01	5	41.833	49.465	-15.917	31.833	0.7105	1	0.3993	nsig	0
Single_Model	PE(P-16:0/18:1)	6.28808	3.39379	1.85282	0.0639081		Anova	model.00	4	40.544	46.649	-16.272	32.544	model.01	5	31.881	39.513	-10.941	21.881	10.663	1	0.001093	nsig	HMDB11342
Single_Model	PE(P-16:0/18:2)	4.6946	2.0667	2.27155	0.0231139		Anova	model.00	4	40.544	46.649	-16.272	32.544	model.01	5	32.22	39.852	-11.11	22.22	10.323	1	0.001314	sig	HMDB11343
Single_Model	PE(P-16:0/20:3)	0.412381	0.636961	0.647419	0.517361		Anova	model.00	4	40.544	46.649	-16.272	32.544	model.01	5	42.109	49.74	-16.054	32.109	0.435	1	0.5095	nsig	HMDB11351
Single_Model	PE(P-16:0/20:4)	1.66499	1.35799	1.22607	0.220172		Anova	model.00	4	40.544	46.649	-16.272	32.544	model.01	5	40.561	48.193	-15.28	30.561	1.9828	1	0.1591	nsig	HMDB11353
Single_Model	PE(P-16:0/22:4)	0.564287	1.06995	0.527398	0.597918		Anova	model.00	4	40.544	46.649	-16.272	32.544	model.01	5	42.249	49.881	-16.125	32.249	0.2947	1	0.5872	nsig	HMDB11358
Single_Model	PE(P-16:0/22:6)	0.161968	0.372387	0.434945	0.663602		Anova	model.00	4	40.544	46.649	-16.272	32.544	model.01	5	42.355	49.987	-16.177	32.355	0.1886	1	0.6641	nsig	0
Single_Model	PE(P-18:0/16:0)	2.54926	1.49932	1.70028	0.0890787		Anova	model.00	4	40.544	46.649	-16.272	32.544	model.01	5	38.282	45.914	-14.141	28.282	4.2613	1	0.03899	nsig	HMDB11371
Single_Model	PE(P-18:0/18:1)	3.53037	2.10347	1.67836	0.0932775		Anova	model.00	4	40.544	46.649	-16.272	32.544	model.01	5	37.207	44.838	-13.603	27.207	5.3371	1	0.02088	nsig	HMDB11375
Single_Model	PE(P-18:0/18:2)	1.38336	0.964337	1.43452	0.151425		Anova	model.00	4	40.544	46.649	-16.272	32.544	model.01	5	40.236	47.867	-15.118	30.236	2.308	1	0.1287	nsig	HMDB11376
Single_Model	PE(P-18:0/20:3)	0.0479562	0.6058	0.0791618	0.936904		Anova	model.00	4	40.544	46.649	-16.272	32.544	model.01	5	42.537	50.169	-16.269	32.537	0.0063	1	0.9369	nsig	HMDB11384
Single_Model	PE(P-18:0/20:4)	1.34644	1.25077	1.07649	0.281708		Anova	model.00	4	40.544	46.649	-16.272	32.544	model.01	5	41.085	48.717	-15.543	31.085	1.4584	1	0.2272	nsig	HMDB11386
Single_Model	PE(P-18:0/22:4)	0.0387064	1.02507	0.0377598	0.969879		Anova	model.00	4	40.544	46.649	-16.272	32.544	model.01	5	42.542	50.174	-16.271	32.542	0.0014	1	0.9698	nsig	HMDB11391
Single_Model	PE(P-18:0/22:6)	0.20888	0.41022	0.509191	0.610618		Anova	model.00	4	40.544	46.649	-16.272	32.544	model.01	5	42.284	49.916	-16.142	32.284	0.2599	1	0.6102	nsig	HMDB11394
Single_Model	PE(P-18:1/18:1)	-0.0883624	1.05115	-0.0840626	0.933007		Anova	model.00	4	40.544	46.649	-16.272	32.544	model.01	5	42.537	50.168	-16.268	32.537	0.0071	1	0.9331	nsig	HMDB11441
Single_Model	PE(P-18:1/18:2)	1.32738	1.14366	1.16064	0.245787		Anova	model.00	4	40.544	46.649	-16.272	32.544	model.01	5	41.002	48.634	-15.501	31.002	1.5419	1	0.2143	nsig	HMDB11442
Single_Model	PE(P-18:1/20:3)	-0.445381	1.13762	-0.391504	0.695425		Anova	model.00	4	40.544	46.649	-16.272	32.544	model.01	5	42.392	50.023	-16.196	32.392	0.1521	1	0.6965	nsig	HMDB11450
Single_Model	PE(P-18:1/20:4)	-0.672501	0.898748	-0.748264	0.454301		Anova	model.00	4	40.544	46.649	-16.272	32.544	model.01	5	41.974	49.606	-15.987	31.974	0.5696	1	0.4504	nsig	HMDB11451
Single_Model	SM(18:0)	-2.7131	1.0351	-2.6211	0.00876469		Anova	model.00	4	40.544	46.649	-16.272	32.544	model.01	5	31.124	38.756	-10.562	21.124	11.419	1	0.0007269	sig	HMDB01348
Single_Model	SM(18:1)	-3.14499	1.24054	-2.53517	0.0112393		Anova	model.00	4	40.544	46.649	-16.272	32.544	model.01	5	31.663	39.294	-10.831	21.663	10.881	1	0.0009715	sig	HMDB12101
Single_Model	SM(20:1)	-2.26413	1.17919	-1.92007	0.0548489		Anova	model.00	4	40.544	46.649	-16.272	32.544	model.01	5	38.378	46.01	-14.189	28.378	4.1658	1	0.04125	nsig	0
Single_Model	SM(22:0)	-1.45226	1.13746	-1.27675	0.201689		Anova	model.00	4	40.544	46.649	-16.272	32.544	model.01	5	40.795	48.427	-15.397	30.795	1.7489	1	0.186	nsig	HMDB12103
Single_Model	SM(22:1)	-0.558094	1.3096	-0.426156	0.669994		Anova	model.00	4	40.544	46.649	-16.272	32.544	model.01	5	42.364	49.996	-16.182	32.364	0.1797	1	0.6717	nsig	HMDB12104
Single_Model	SM(24:0)	-4.98988	1.57963	-3.15889	0.0015837		Anova	model.00	4	40.544	46.649	-16.2718	32.544	model.01	5	29.501	37.133	-9.7505	19.501	13.043	1	0.0003045	sig	HMDB11697
Single_Model	SM(24:1)	-2.43271	1.13904	-2.13575	0.0326995		Anova	model.00	4	40.544	46.649	-16.272	32.544	model.01	5	36.552	44.184	-13.276	26.552	5.9919	1	0.01437	sig	HMDB12107
Single_Model	SM(26:0)	-2.89778	2.85332	-1.01558	0.309827		Anova	model.00	4	40.544	46.649	-16.272	32.544	model.01	5	41.485	49.116	-15.742	31.485	1.0591	1	0.3034	nsig	HMDB11698
Single_Model	TAG36:0-FA12:0	-1.36477	0.556162	-2.45391	0.0141314		Anova	model.00	4	40.544	46.649	-16.2718	32.544	model.01	5	22.764	30.396	-6.3819	12.764	19.78	1	8.689e-06	sig	0
Single_Model	TAG40:0-FA16:0	-0.988717	0.40504	-2.44104	0.0146451		Anova	model.00	4	40.544	46.649	-16.2718	32.544	model.01	5	22.323	29.955	-6.1617	12.323	20.22	1	6.902e-06	sig	0
Single_Model	TAG42:0-FA14:0	-1.18075	0.509543	-2.31727	0.0204888		Anova	model.00	4	40.544	46.649	-16.2718	32.544	model.01	5	21.541	29.173	-5.7707	11.541	21.002	1	4.587e-06	sig	0
Single_Model	TAG42:0-FA16:0	-1.04833	0.44549	-2.3532	0.0186128		Anova	model.00	4	40.544	46.649	-16.2718	32.544	model.01	5	23.35	30.981	-6.6748	13.35	19.194	1	1.181e-05	sig	0
Single_Model	TAG42:1-FA18:1	-1.16738	0.516268	-2.26119	0.0237475		Anova	model.00	4	40.544	46.649	-16.2718	32.544	model.01	5	20.305	27.937	-5.1525	10.305	22.239	1	2.408e-06	sig	0
Single_Model	TAG44:0-FA12:0	-1.20694	0.564893	-2.13658	0.0326325		Anova	model.00	4	40.544	46.649	-16.2718	32.544	model.01	5	22.237	29.869	-6.1187	12.237	20.306	1	6.598e-06	sig	0
Single_Model	TAG44:0-FA14:0	-1.06482	0.454983	-2.34036	0.019265		Anova	model.00	4	40.544	46.649	-16.2718	32.544	model.01	5	23.285	30.917	-6.6427	13.285	19.258	1	1.142e-05	sig	0
Single_Model	TAG44:0-FA16:0	-1.14218	0.500506	-2.28204	0.0224868		Anova	model.00	4	40.544	46.649	-16.2718	32.544	model.01	5	22.476	30.108	-6.2381	12.476	20.067	1	7.476e-06	sig	0
Single_Model	TAG44:0-FA18:0	-1.47889	0.649896	-2.27557	0.0228715		Anova	model.00	4	40.544	46.649	-16.2718	32.544	model.01	5	19.397	27.029	-4.6984	9.397	23.147	1	1.501e-06	sig	0
Single_Model	TAG44:1-FA12:0	-1.09956	0.540501	-2.03433	0.0419187		Anova	model.00	4	40.544	46.649	-16.2718	32.544	model.01	5	22.106	29.738	-6.0528	12.106	20.438	1	6.16e-06	sig	0
Single_Model	TAG44:1-FA14:0	-1.10426	0.519987	-2.12363	0.0337011		Anova	model.00	4	40.544	46.649	-16.2718	32.544	model.01	5	21.703	29.335	-5.8515	11.703	20.841	1	4.991e-06	sig	0
Single_Model	TAG44:1-FA16:0	-1.12379	0.512526	-2.19264	0.0283331		Anova	model.00	4	40.544	46.649	-16.2718	32.544	model.01	5	21.157	28.789	-5.5786	11.157	21.386	1	3.754e-06	sig	0
Single_Model	TAG44:1-FA16:1	-1.1572	0.471832	-2.45257	0.014184		Anova	model.00	4	40.544	46.649	-16.2718	32.544	model.01	5	20.928	28.559	-5.4638	10.928	21.616	1	3.331e-06	sig	0
Single_Model	TAG44:1-FA18:1	-1.27558	0.539764	-2.36322	0.018117		Anova	model.00	4	40.544	46.649	-16.2718	32.544	model.01	5	19.967	27.599	-4.9836	9.967	22.576	1	2.019e-06	sig	0
Single_Model	TAG44:2-FA16:0	-1.151	0.509679	-2.25828	0.0239279		Anova	model.00	4	40.544	46.649	-16.2718	32.544	model.01	5	20.84	28.471	-5.4198	10.84	21.704	1	3.181e-06	sig	0
Single_Model	TAG44:2-FA18:1	-1.21383	0.561134	-2.16318	0.0305274		Anova	model.00	4	40.544	46.649	-16.2718	32.544	model.01	5	21.059	28.691	-5.5294	11.059	21.485	1	3.566e-06	sig	0
Single_Model	TAG44:2-FA18:2	-1.29984	0.594384	-2.18687	0.0287517		Anova	model.00	4	40.544	46.649	-16.2718	32.544	model.01	5	20.282	27.914	-5.1411	10.282	22.262	1	2.379e-06	sig	0
Single_Model	TAG45:0-FA14:0	-1.13598	0.460578	-2.46642	0.0136472		Anova	model.00	4	40.544	46.649	-16.2718	32.544	model.01	5	24.491	32.123	-7.2456	14.491	18.052	1	2.149e-05	sig	0
Single_Model	TAG45:0-FA15:0	-1.01223	0.394953	-2.56292	0.0103795		Anova	model.00	4	40.544	46.649	-16.2718	32.544	model.01	5	24.59	32.222	-7.2951	14.59	17.953	1	2.264e-05	sig	0
Single_Model	TAG45:0-FA16:0	-1.16536	0.433524	-2.68811	0.00718587		Anova	model.00	4	40.544	46.649	-16.2718	32.544	model.01	5	23.574	31.206	-6.7871	13.574	18.969	1	1.328e-05	sig	0
Single_Model	TAG45:1-FA16:0	-1.03415	0.414535	-2.49472	0.0126057		Anova	model.00	4	40.544	46.649	-16.2718	32.544	model.01	5	23.748	31.379	-6.8738	13.748	18.796	1	1.455e-05	sig	0
Single_Model	TAG45:1-FA18:1	-1.23571	0.466342	-2.64979	0.00805414		Anova	model.00	4	40.544	46.649	-16.2718	32.544	model.01	5	20.062	27.693	-5.0308	10.062	22.482	1	2.121e-06	sig	0
Single_Model	TAG46:0-FA14:0	-1.01781	0.419345	-2.42714	0.0152186		Anova	model.00	4	40.544	46.649	-16.2718	32.544	model.01	5	25.026	32.658	-7.5132	15.026	17.517	1	2.847e-05	sig	0
Single_Model	TAG46:0-FA16:0	-0.989195	0.407632	-2.42668	0.0152375		Anova	model.00	4	40.544	46.649	-16.2718	32.544	model.01	5	25.05	32.682	-7.5252	15.05	17.493	1	2.883e-05	sig	0
Single_Model	TAG46:0-FA18:0	-1.4875	0.703815	-2.11349	0.0345591		Anova	model.00	4	40.544	46.649	-16.2718	32.544	model.01	5	20.7	28.332	-5.3502	10.7	21.843	1	2.958e-06	sig	0
Single_Model	TAG46:1-FA12:0	-1.23691	0.591688	-2.09048	0.036575		Anova	model.00	4	40.544	46.649	-16.2718	32.544	model.01	5	20.975	28.607	-5.4875	10.975	21.569	1	3.414e-06	sig	0
Single_Model	TAG46:1-FA14:0	-1.00876	0.458094	-2.20209	0.0276592		Anova	model.00	4	40.544	46.649	-16.2718	32.544	model.01	5	23.598	31.23	-6.7989	13.598	18.946	1	1.345e-05	sig	0
Single_Model	TAG46:1-FA14:1	-1.14846	0.46169	-2.48752	0.0128639		Anova	model.00	4	40.544	46.649	-16.2718	32.544	model.01	5	23.685	31.317	-6.8426	13.685	18.858	1	1.408e-05	sig	0
Single_Model	TAG46:1-FA16:0	-1.09783	0.506749	-2.16642	0.0302789		Anova	model.00	4	40.544	46.649	-16.2718	32.544	model.01	5	22.418	30.05	-6.2089	12.418	20.126	1	7.251e-06	sig	0
Single_Model	TAG46:1-FA16:1	-1.05659	0.442361	-2.38853	0.0169161		Anova	model.00	4	40.544	46.649	-16.2718	32.544	model.01	5	22.908	30.54	-6.4542	12.908	19.635	1	9.372e-06	sig	0
Single_Model	TAG46:1-FA18:0	-1.62515	0.792171	-2.05151	0.040217		Anova	model.00	4	40.544	46.649	-16.2718	32.544	model.01	5	18.544	26.176	-4.2721	8.544	24	1	9.64e-07	sig	0
Single_Model	TAG46:1-FA18:1	-1.28802	0.540373	-2.38357	0.0171454		Anova	model.00	4	40.544	46.649	-16.2718	32.544	model.01	5	19.931	27.562	-4.9653	9.931	22.613	1	1.981e-06	sig	0
Single_Model	TAG46:2-FA12:0	-1.26804	0.618066	-2.05162	0.0402069		Anova	model.00	4	40.544	46.649	-16.2718	32.544	model.01	5	20.965	28.596	-5.4823	10.965	21.579	1	3.395e-06	sig	0
Single_Model	TAG46:2-FA14:0	-1.03882	0.477885	-2.17378	0.0297217		Anova	model.00	4	40.544	46.649	-16.2718	32.544	model.01	5	22.979	30.611	-6.4895	12.979	19.565	1	9.726e-06	sig	0
Single_Model	TAG46:2-FA16:0	-1.16091	0.556141	-2.08744	0.0368484		Anova	model.00	4	40.544	46.649	-16.2718	32.544	model.01	5	22.151	29.783	-6.0757	12.151	20.392	1	6.308e-06	sig	0
Single_Model	TAG46:2-FA16:1	-1.11616	0.494055	-2.25919	0.0238717		Anova	model.00	4	40.544	46.649	-16.2718	32.544	model.01	5	21.874	29.505	-5.9368	11.874	20.67	1	5.456e-06	sig	0
Single_Model	TAG46:2-FA18:1	-1.34606	0.594672	-2.26354	0.0236026		Anova	model.00	4	40.544	46.649	-16.2718	32.544	model.01	5	20.171	27.803	-5.0857	10.171	22.372	1	2.246e-06	sig	0
Single_Model	TAG46:2-FA18:2	-1.32603	0.598931	-2.214	0.0268287		Anova	model.00	4	40.544	46.649	-16.2718	32.544	model.01	5	20.582	28.214	-5.2912	10.582	21.961	1	2.782e-06	sig	0
Single_Model	TAG46:3-FA18:1	-1.58452	0.731344	-2.16658	0.0302667		Anova	model.00	4	40.544	46.649	-16.272	32.544	model.01	5	19.724	27.356	-4.862	9.724	22.82	1	1.779e-06	sig	0
Single_Model	TAG46:3-FA18:2	-1.35748	0.621366	-2.18466	0.0289135		Anova	model.00	4	40.544	46.649	-16.2718	32.544	model.01	5	20.53	28.161	-5.2648	10.53	22.014	1	2.707e-06	sig	0
Single_Model	TAG47:0-FA14:0	-1.16917	0.447353	-2.61353	0.00896114		Anova	model.00	4	40.544	46.649	-16.2718	32.544	model.01	5	24.806	32.438	-7.4031	14.806	17.738	1	2.536e-05	sig	0
Single_Model	TAG47:0-FA15:0	-1.31368	0.4962	-2.64747	0.00810956		Anova	model.00	4	40.544	46.649	-16.2718	32.544	model.01	5	24.639	32.271	-7.3197	14.639	17.904	1	2.323e-05	sig	0
Single_Model	TAG47:0-FA16:0	-1.18107	0.443963	-2.66029	0.00780734		Anova	model.00	4	40.544	46.649	-16.272	32.544	model.01	5	26.134	33.766	-8.067	16.134	16.41	1	5.103e-05	sig	0
Single_Model	TAG47:0-FA17:0	-1.36402	0.516844	-2.63912	0.00831211		Anova	model.00	4	40.544	46.649	-16.2718	32.544	model.01	5	24.923	32.555	-7.4614	14.923	17.621	1	2.696e-05	sig	0
Single_Model	TAG47:1-FA14:0	-1.08571	0.461715	-2.35147	0.0186992		Anova	model.00	4	40.544	46.649	-16.2718	32.544	model.01	5	24.006	31.638	-7.0032	14.006	18.537	1	1.666e-05	sig	0
Single_Model	TAG47:1-FA15:0	-1.15997	0.46585	-2.49	0.0127743		Anova	model.00	4	40.544	46.649	-16.272	32.544	model.01	5	22.482	30.114	-6.241	12.482	20.062	1	7.498e-06	sig	0
Single_Model	TAG47:1-FA16:0	-1.11098	0.450132	-2.46812	0.0135827		Anova	model.00	4	40.544	46.649	-16.2718	32.544	model.01	5	24.252	31.884	-7.1259	14.252	18.292	1	1.895e-05	sig	0
Single_Model	TAG47:1-FA16:1	-1.24742	0.585888	-2.12911	0.0332448		Anova	model.00	4	40.544	46.649	-16.272	32.544	model.01	5	32.085	39.717	-11.043	22.085	10.459	1	0.001221	sig	0
Single_Model	TAG47:1-FA18:1	-1.2476	0.481413	-2.59155	0.00955457		Anova	model.00	4	40.544	46.649	-16.2718	32.544	model.01	5	20.508	28.139	-5.2538	10.508	22.036	1	2.676e-06	sig	0
Single_Model	TAG47:2-FA16:1	-1.19641	0.435966	-2.74429	0.00606428		Anova	model.00	4	40.544	46.649	-16.2718	32.544	model.01	5	22.273	29.905	-6.1366	12.273	20.27	1	6.723e-06	sig	0
Single_Model	TAG47:2-FA18:1	-1.34784	0.551681	-2.44316	0.0145594		Anova	model.00	4	40.544	46.649	-16.2718	32.544	model.01	5	21.102	28.734	-5.5511	11.102	21.442	1	3.648e-06	sig	0
Single_Model	TAG47:2-FA18:2	-1.1402	0.500761	-2.27693	0.0227903		Anova	model.00	4	40.544	46.649	-16.2718	32.544	model.01	5	23.46	31.092	-6.7299	13.46	19.084	1	1.251e-05	sig	0
Single_Model	TAG48:0-FA14:0	-1.10463	0.483465	-2.28482	0.0223232		Anova	model.00	4	40.544	46.649	-16.272	32.544	model.01	5	23.466	31.098	-6.733	13.466	19.078	1	1.255e-05	sig	0
Single_Model	TAG48:0-FA16:0	-1.04581	0.423395	-2.47005	0.0135096		Anova	model.00	4	40.544	46.649	-16.2718	32.544	model.01	5	25.755	33.387	-7.8776	15.755	16.788	1	4.179e-05	sig	0
Single_Model	TAG48:0-FA18:0	-1.12911	0.498719	-2.26403	0.0235724		Anova	model.00	4	40.544	46.649	-16.2718	32.544	model.01	5	23.474	31.106	-6.7369	13.474	19.07	1	1.26e-05	sig	0
Single_Model	TAG48:1-FA12:0	-1.31649	0.76596	-1.71874	0.0856615		Anova	model.00	4	40.544	46.649	-16.272	32.544	model.01	5	21.506	29.138	-5.753	11.506	21.038	1	4.503e-06	nsig	0
Single_Model	TAG48:1-FA14:0	-1.07914	0.492457	-2.19135	0.0284266		Anova	model.00	4	40.544	46.649	-16.2718	32.544	model.01	5	23.222	30.854	-6.6112	13.222	19.321	1	1.105e-05	sig	0
Single_Model	TAG48:1-FA16:0	-1.01272	0.451028	-2.24535	0.0247456		Anova	model.00	4	40.544	46.649	-16.2718	32.544	model.01	5	24.026	31.657	-7.0128	14.026	18.518	1	1.683e-05	sig	0
Single_Model	TAG48:1-FA16:1	-1.02839	0.425171	-2.41877	0.015573		Anova	model.00	4	40.544	46.649	-16.2718	32.544	model.01	5	24.19	31.821	-7.0948	14.19	18.354	1	1.834e-05	sig	0
Single_Model	TAG48:1-FA18:0	-1.30678	0.655804	-1.99264	0.0463013		Anova	model.00	4	40.544	46.649	-16.2718	32.544	model.01	5	21.427	29.058	-5.7133	11.427	21.117	1	4.321e-06	sig	0
Single_Model	TAG48:1-FA18:1	-1.07226	0.495142	-2.16555	0.0303454		Anova	model.00	4	40.544	46.649	-16.2718	32.544	model.01	5	23.116	30.748	-6.5579	13.116	19.428	1	1.045e-05	sig	0
Single_Model	TAG48:2-FA12:0	-1.40738	0.697737	-2.01706	0.0436892		Anova	model.00	4	40.544	46.649	-16.2718	32.544	model.01	5	19.79	27.422	-4.8951	9.79	22.753	1	1.842e-06	sig	0
Single_Model	TAG48:2-FA14:0	-1.06199	0.484094	-2.19377	0.0282519		Anova	model.00	4	40.544	46.649	-16.272	32.544	model.01	5	23.354	30.986	-6.677	13.354	19.19	1	1.184e-05	sig	0
Single_Model	TAG48:2-FA14:1	-1.0698	0.486459	-2.19917	0.027866		Anova	model.00	4	40.544	46.649	-16.2718	32.544	model.01	5	22.547	30.179	-6.2734	12.547	19.997	1	7.757e-06	sig	0
Single_Model	TAG48:2-FA16:0	-1.00187	0.453417	-2.2096	0.0271329		Anova	model.00	4	40.544	46.649	-16.2718	32.544	model.01	5	23.653	31.285	-6.8264	13.653	18.891	1	1.384e-05	sig	0
Single_Model	TAG48:2-FA16:1	-0.99219	0.432417	-2.29452	0.0217606		Anova	model.00	4	40.544	46.649	-16.2718	32.544	model.01	5	23.069	30.701	-6.5346	13.069	19.474	1	1.02e-05	sig	0
Single_Model	TAG48:2-FA18:1	-1.16858	0.560523	-2.08481	0.0370866		Anova	model.00	4	40.544	46.649	-16.2718	32.544	model.01	5	21.57	29.202	-5.7849	11.57	20.974	1	4.656e-06	sig	0
Single_Model	TAG48:2-FA18:2	-1.07444	0.496368	-2.1646	0.0304182		Anova	model.00	4	40.544	46.649	-16.272	32.544	model.01	5	23.268	30.9	-6.634	13.268	19.276	1	1.131e-05	sig	0
Single_Model	TAG48:3-FA12:0	-1.44677	0.738516	-1.95903	0.0501098		Anova	model.00	4	40.544	46.649	-16.2718	32.544	model.01	5	19.955	27.587	-4.9775	9.955	22.589	1	2.007e-06	nsig	0
Single_Model	TAG48:3-FA14:0	-1.11713	0.509919	-2.1908	0.028466		Anova	model.00	4	40.544	46.649	-16.2718	32.544	model.01	5	22.053	29.685	-6.0264	12.053	20.491	1	5.992e-06	sig	0
Single_Model	TAG48:3-FA14:1	-1.11825	0.501018	-2.23195	0.0256184		Anova	model.00	4	40.544	46.649	-16.2718	32.544	model.01	5	22.296	29.927	-6.1478	12.296	20.248	1	6.803e-06	sig	0
Single_Model	TAG48:3-FA16:0	-1.03203	0.472562	-2.18389	0.02897		Anova	model.00	4	40.544	46.649	-16.2718	32.544	model.01	5	22.945	30.577	-6.4727	12.945	19.598	1	9.556e-06	sig	0
Single_Model	TAG48:3-FA16:1	-1.07687	0.428765	-2.51156	0.0120198		Anova	model.00	4	40.544	46.649	-16.272	32.544	model.01	5	20.914	28.546	-5.457	10.914	21.63	1	3.307e-06	sig	0
Single_Model	TAG48:3-FA18:1	-1.34379	0.680399	-1.975	0.0482684		Anova	model.00	4	40.544	46.649	-16.2718	32.544	model.01	5	20.952	28.584	-5.4761	10.952	21.591	1	3.374e-06	sig	0
Single_Model	TAG48:3-FA18:2	-1.17564	0.583703	-2.0141	0.0439986		Anova	model.00	4	40.544	46.649	-16.2718	32.544	model.01	5	22.057	29.689	-6.0287	12.057	20.486	1	6.006e-06	sig	0
Single_Model	TAG48:4-FA16:1	-1.16578	0.428259	-2.72215	0.00648593		Anova	model.00	4	40.544	46.649	-16.2718	32.544	model.01	5	19.975	27.607	-4.9877	9.975	22.568	1	2.028e-06	sig	0
Single_Model	TAG48:4-FA18:2	-1.39758	0.700992	-1.99371	0.0461837		Anova	model.00	4	40.544	46.649	-16.2718	32.544	model.01	5	20.367	27.999	-5.1834	10.367	22.177	1	2.486e-06	sig	0
Single_Model	TAG49:0-FA15:0	-1.27102	0.505469	-2.51454	0.0119187		Anova	model.00	4	40.544	46.649	-16.2718	32.544	model.01	5	24.361	31.993	-7.1804	14.361	18.183	1	2.007e-05	sig	0
Single_Model	TAG49:0-FA16:0	-1.18233	0.463541	-2.55064	0.0107525		Anova	model.00	4	40.544	46.649	-16.2718	32.544	model.01	5	26.655	34.287	-8.3275	16.655	15.889	1	6.718e-05	sig	0
Single_Model	TAG49:0-FA17:0	-1.19888	0.472223	-2.53881	0.0111232		Anova	model.00	4	40.544	46.649	-16.2718	32.544	model.01	5	26.514	34.145	-8.2568	16.514	16.03	1	6.235e-05	sig	0
Single_Model	TAG49:0-FA18:0	-1.21314	0.466235	-2.602	0.00926821		Anova	model.00	4	40.544	46.649	-16.2718	32.544	model.01	5	25.56	33.192	-7.7799	15.56	16.984	1	3.77e-05	sig	0
Single_Model	TAG49:1-FA14:0	-1.11632	0.477294	-2.33886	0.0193427		Anova	model.00	4	40.544	46.649	-16.2718	32.544	model.01	5	24.221	31.853	-7.1106	14.221	18.322	1	1.865e-05	sig	0
Single_Model	TAG49:1-FA15:0	-1.12985	0.474098	-2.38317	0.0171645		Anova	model.00	4	40.544	46.649	-16.2718	32.544	model.01	5	24.377	32.009	-7.1886	14.377	18.166	1	2.024e-05	sig	0
Single_Model	TAG49:1-FA16:0	-1.12585	0.455186	-2.47338	0.0133843		Anova	model.00	4	40.544	46.649	-16.2718	32.544	model.01	5	24.873	32.505	-7.4366	14.873	17.671	1	2.627e-05	sig	0
Single_Model	TAG49:1-FA16:1	-1.45334	0.517343	-2.80924	0.00496589		Anova	model.00	4	40.544	46.649	-16.2718	32.544	model.01	5	23.318	30.949	-6.6588	13.318	19.226	1	1.161e-05	sig	0
Single_Model	TAG49:1-FA17:0	-0.94326	0.423189	-2.22894	0.0258182		Anova	model.00	4	40.544	46.649	-16.2718	32.544	model.01	5	26.417	34.049	-8.2085	16.417	16.127	1	5.925e-05	sig	0
Single_Model	TAG49:1-FA18:1	-1.14673	0.482617	-2.37607	0.0174983		Anova	model.00	4	40.544	46.649	-16.2718	32.544	model.01	5	23.945	31.577	-6.9725	13.945	18.599	1	1.613e-05	sig	0
Single_Model	TAG49:2-FA14:0	-1.22389	0.50115	-2.44217	0.0145993		Anova	model.00	4	40.544	46.649	-16.2718	32.544	model.01	5	20.995	28.627	-5.4975	10.995	21.549	1	3.45e-06	sig	0
Single_Model	TAG49:2-FA15:0	-1.0423	0.415282	-2.50986	0.012078		Anova	model.00	4	40.544	46.649	-16.2718	32.544	model.01	5	25.469	33.101	-7.7344	15.469	17.075	1	3.594e-05	sig	0
Single_Model	TAG49:2-FA16:0	-1.13879	0.452872	-2.5146	0.0119168		Anova	model.00	4	40.544	46.649	-16.2718	32.544	model.01	5	24.285	31.917	-7.1427	14.285	18.258	1	1.929e-05	sig	0
Single_Model	TAG49:2-FA16:1	-1.35249	0.489959	-2.76041	0.00577283		Anova	model.00	4	40.544	46.649	-16.2718	32.544	model.01	5	22.162	29.793	-6.0808	12.162	20.382	1	6.342e-06	sig	0
Single_Model	TAG49:2-FA18:1	-1.14582	0.507232	-2.25896	0.0238859		Anova	model.00	4	40.544	46.649	-16.2718	32.544	model.01	5	22.285	29.917	-6.1424	12.285	20.259	1	6.764e-06	sig	0
Single_Model	TAG49:2-FA18:2	-1.08859	0.458132	-2.37616	0.0174941		Anova	model.00	4	40.544	46.649	-16.2718	32.544	model.01	5	25.847	33.479	-7.9235	15.847	16.697	1	4.386e-05	sig	0
Single_Model	TAG49:3-FA16:1	-1.45028	0.5464	-2.65424	0.0079488		Anova	model.00	4	40.544	46.649	-16.2718	32.544	model.01	5	22.756	30.388	-6.3781	12.756	19.787	1	8.655e-06	sig	0
Single_Model	TAG49:3-FA18:2	-1.06309	0.46605	-2.28106	0.0225448		Anova	model.00	4	40.544	46.649	-16.2718	32.544	model.01	5	23.571	31.202	-6.7853	13.571	18.973	1	1.326e-05	sig	0
Single_Model	TAG50:0-FA14:0	-1.48083	0.697485	-2.12311	0.033745		Anova	model.00	4	40.544	46.649	-16.2718	32.544	model.01	5	21.473	29.105	-5.7365	11.473	21.071	1	4.426e-06	sig	0
Single_Model	TAG50:0-FA16:0	-1.20373	0.493664	-2.43836	0.0147539		Anova	model.00	4	40.544	46.649	-16.2718	32.544	model.01	5	24.351	31.983	-7.1757	14.351	18.192	1	1.997e-05	sig	0
Single_Model	TAG50:0-FA18:0	-1.24844	0.496795	-2.51299	0.0119712		Anova	model.00	4	40.544	46.649	-16.2718	32.544	model.01	5	25.148	32.78	-7.5739	15.148	17.396	1	3.035e-05	sig	0
Single_Model	TAG50:1-FA14:0	-1.32419	0.641553	-2.06404	0.0390135		Anova	model.00	4	40.544	46.649	-16.2718	32.544	model.01	5	21.993	29.625	-5.9967	11.993	20.55	1	5.809e-06	sig	0
Single_Model	TAG50:1-FA16:0	-1.14242	0.506177	-2.25695	0.0240113		Anova	model.00	4	40.544	46.649	-16.2718	32.544	model.01	5	23.692	31.324	-6.8461	13.692	18.852	1	1.413e-05	sig	0
Single_Model	TAG50:1-FA16:1	-1.01514	0.430257	-2.35939	0.018305		Anova	model.00	4	40.544	46.649	-16.2718	32.544	model.01	5	24.68	32.311	-7.3398	14.68	17.864	1	2.373e-05	sig	0
Single_Model	TAG50:1-FA18:0	-1.18467	0.549153	-2.15726	0.0309853		Anova	model.00	4	40.544	46.649	-16.2718	32.544	model.01	5	23.263	30.895	-6.6316	13.263	19.28	1	1.129e-05	sig	0
Single_Model	TAG50:1-FA18:1	-1.13917	0.506404	-2.24953	0.0244788		Anova	model.00	4	40.544	46.649	-16.2718	32.544	model.01	5	23.769	31.4	-6.8843	13.769	18.775	1	1.471e-05	sig	0
Single_Model	TAG50:2-FA14:0	-1.19877	0.575593	-2.08267	0.0372815		Anova	model.00	4	40.544	46.649	-16.2718	32.544	model.01	5	22.155	29.786	-6.0773	12.155	20.389	1	6.319e-06	sig	0
Single_Model	TAG50:2-FA14:1	-1.36053	0.619816	-2.19505	0.0281599		Anova	model.00	4	40.544	46.649	-16.2718	32.544	model.01	5	20.439	28.071	-5.2197	10.439	22.104	1	2.582e-06	sig	0
Single_Model	TAG50:2-FA16:0	-1.09254	0.480592	-2.27333	0.0230063		Anova	model.00	4	40.544	46.649	-16.2718	32.544	model.01	5	24.037	31.669	-7.0187	14.037	18.506	1	1.693e-05	sig	0
Single_Model	TAG50:2-FA16:1	-1.03714	0.461458	-2.24753	0.0246061		Anova	model.00	4	40.544	46.649	-16.2718	32.544	model.01	5	23.097	30.729	-6.5485	13.097	19.447	1	1.035e-05	sig	0
Single_Model	TAG50:2-FA18:0	-1.19215	0.576243	-2.06884	0.0385612		Anova	model.00	4	40.544	46.649	-16.2718	32.544	model.01	5	23.399	31.031	-6.6997	13.399	19.144	1	1.212e-05	sig	0
Single_Model	TAG50:2-FA18:1	-1.075	0.499798	-2.15088	0.031486		Anova	model.00	4	40.544	46.649	-16.2718	32.544	model.01	5	22.843	30.475	-6.4217	12.843	19.7	1	9.059e-06	sig	0
Single_Model	TAG50:2-FA18:2	-1.15224	0.495814	-2.32394	0.0201286		Anova	model.00	4	40.544	46.649	-16.2718	32.544	model.01	5	24.266	31.898	-7.1329	14.266	18.278	1	1.909e-05	sig	0
Single_Model	TAG50:3-FA14:0	-1.19271	0.587665	-2.02959	0.0423987		Anova	model.00	4	40.544	46.649	-16.2718	32.544	model.01	5	22.405	30.037	-6.2024	12.405	20.139	1	7.202e-06	sig	0
Single_Model	TAG50:3-FA14:1	-1.24983	0.578744	-2.15956	0.0308068		Anova	model.00	4	40.544	46.649	-16.2718	32.544	model.01	5	21.319	28.951	-5.6597	11.319	21.224	1	4.086e-06	sig	0
Single_Model	TAG50:3-FA16:0	-1.05662	0.474392	-2.22732	0.0259257		Anova	model.00	4	40.544	46.649	-16.2718	32.544	model.01	5	23.514	31.146	-6.7572	13.514	19.029	1	1.287e-05	sig	0
Single_Model	TAG50:3-FA16:1	-1.05143	0.474491	-2.21591	0.0266976		Anova	model.00	4	40.544	46.649	-16.2718	32.544	model.01	5	23.228	30.86	-6.6142	13.228	19.315	1	1.108e-05	sig	0
Single_Model	TAG50:3-FA18:1	-1.14356	0.552003	-2.07165	0.038298		Anova	model.00	4	40.544	46.649	-16.2718	32.544	model.01	5	22.42	30.052	-6.2102	12.42	20.123	1	7.261e-06	sig	0
Single_Model	TAG50:3-FA18:2	-1.0774	0.50324	-2.14094	0.032279		Anova	model.00	4	40.544	46.649	-16.2718	32.544	model.01	5	23.271	30.903	-6.6356	13.271	19.273	1	1.133e-05	sig	0
Single_Model	TAG50:3-FA18:3	-0.978745	0.445596	-2.19648	0.0280574		Anova	model.00	4	40.544	46.649	-16.2718	32.544	model.01	5	25.374	33.005	-7.6868	15.374	17.17	1	3.418e-05	sig	0
Single_Model	TAG50:4-FA14:0	-1.21685	0.575226	-2.11543	0.0343929		Anova	model.00	4	40.544	46.649	-16.2718	32.544	model.01	5	21.335	28.967	-5.6674	11.335	21.209	1	4.118e-06	sig	0
Single_Model	TAG50:4-FA14:1	-1.27639	0.594234	-2.14796	0.0317172		Anova	model.00	4	40.544	46.649	-16.2718	32.544	model.01	5	21.367	28.998	-5.6833	11.367	21.177	1	4.188e-06	sig	0
Single_Model	TAG50:4-FA16:0	-1.11118	0.486971	-2.28182	0.0225002		Anova	model.00	4	40.544	46.649	-16.2718	32.544	model.01	5	22.061	29.692	-6.0303	12.061	20.483	1	6.016e-06	sig	0
Single_Model	TAG50:4-FA16:1	-1.06611	0.477432	-2.233	0.0255489		Anova	model.00	4	40.544	46.649	-16.272	32.544	model.01	5	22.102	29.734	-6.051	12.102	20.442	1	6.148e-06	sig	0
Single_Model	TAG50:4-FA18:1	-1.12103	0.570866	-1.96373	0.0495609		Anova	model.00	4	40.544	46.649	-16.2718	32.544	model.01	5	22.681	30.313	-6.3407	12.681	19.862	1	8.323e-06	sig	0
Single_Model	TAG50:4-FA18:2	-1.13273	0.538288	-2.10432	0.0353501		Anova	model.00	4	40.544	46.649	-16.2718	32.544	model.01	5	22.331	29.963	-6.1654	12.331	20.213	1	6.928e-06	sig	0
Single_Model	TAG50:4-FA18:3	-1.1218	0.519061	-2.1612	0.0306795		Anova	model.00	4	40.544	46.649	-16.2718	32.544	model.01	5	21.807	29.439	-5.9036	11.807	20.736	1	5.27e-06	sig	0
Single_Model	TAG51:0-FA16:0	-1.17862	0.458434	-2.57097	0.0101414		Anova	model.00	4	40.544	46.649	-16.2718	32.544	model.01	5	27.015	34.647	-8.5076	17.015	15.528	1	8.127e-05	sig	0
Single_Model	TAG51:0-FA17:0	-1.29394	0.493339	-2.62281	0.00872068		Anova	model.00	4	40.544	46.649	-16.2718	32.544	model.01	5	25.727	33.359	-7.8637	15.727	16.816	1	4.118e-05	sig	0
Single_Model	TAG51:0-FA18:0	-1.42787	0.551808	-2.58762	0.00966407		Anova	model.00	4	40.544	46.649	-16.2718	32.544	model.01	5	25.439	33.071	-7.7195	15.439	17.105	1	3.538e-05	sig	0
Single_Model	TAG51:1-FA15:0	-1.36377	0.598884	-2.27719	0.0227746		Anova	model.00	4	40.544	46.649	-16.2718	32.544	model.01	5	23.79	31.422	-6.8949	13.79	18.754	1	1.487e-05	sig	0
Single_Model	TAG51:1-FA16:0	-1.20378	0.484067	-2.4868	0.0128897		Anova	model.00	4	40.544	46.649	-16.2718	32.544	model.01	5	24.069	31.701	-7.0347	14.069	18.474	1	1.722e-05	sig	0
Single_Model	TAG51:1-FA17:0	-1.19375	0.495644	-2.40847	0.0160193		Anova	model.00	4	40.544	46.649	-16.2718	32.544	model.01	5	23.913	31.545	-6.9564	13.913	18.631	1	1.586e-05	sig	0
Single_Model	TAG51:1-FA18:0	-1.30405	0.56464	-2.30953	0.0209143		Anova	model.00	4	40.544	46.649	-16.2718	32.544	model.01	5	23.794	31.426	-6.8972	13.794	18.749	1	1.491e-05	sig	0
Single_Model	TAG51:1-FA18:1	-1.21671	0.504421	-2.41209	0.0158612		Anova	model.00	4	40.544	46.649	-16.2718	32.544	model.01	5	23.832	31.464	-6.9159	13.832	18.712	1	1.52e-05	sig	0
Single_Model	TAG51:2-FA15:0	-1.21145	0.545129	-2.22232	0.0262616		Anova	model.00	4	40.544	46.649	-16.2718	32.544	model.01	5	23.972	31.603	-6.9858	13.972	18.572	1	1.636e-05	sig	0
Single_Model	TAG51:2-FA16:0	-1.30145	0.510371	-2.55002	0.0107717		Anova	model.00	4	40.544	46.649	-16.2718	32.544	model.01	5	22.578	30.21	-6.2889	12.578	19.966	1	7.884e-06	sig	0
Single_Model	TAG51:2-FA16:1	-1.03323	0.443021	-2.33225	0.0196877		Anova	model.00	4	40.544	46.649	-16.2718	32.544	model.01	5	24.204	31.835	-7.1018	14.204	18.34	1	1.848e-05	sig	0
Single_Model	TAG51:2-FA17:0	-1.12162	0.4528	-2.47706	0.0132468		Anova	model.00	4	40.544	46.649	-16.2718	32.544	model.01	5	25.04	32.672	-7.5201	15.04	17.503	1	2.868e-05	sig	0
Single_Model	TAG51:2-FA18:1	-1.23955	0.528917	-2.34356	0.0191008		Anova	model.00	4	40.544	46.649	-16.2718	32.544	model.01	5	21.609	29.241	-5.8046	11.609	20.934	1	4.752e-06	sig	0
Single_Model	TAG51:2-FA18:2	-1.18145	0.459476	-2.5713	0.0101317		Anova	model.00	4	40.544	46.649	-16.2718	32.544	model.01	5	25.554	33.186	-7.7769	15.554	16.99	1	3.758e-05	sig	0
Single_Model	TAG51:3-FA15:0	-1.21915	0.562033	-2.16919	0.0300682		Anova	model.00	4	40.544	46.649	-16.2718	32.544	model.01	5	23.019	30.651	-6.5095	13.019	19.525	1	9.931e-06	sig	0
Single_Model	TAG51:3-FA16:1	-1.16404	0.48432	-2.40345	0.0162413		Anova	model.00	4	40.544	46.649	-16.2718	32.544	model.01	5	21.884	29.516	-5.9421	11.884	20.66	1	5.486e-06	sig	0
Single_Model	TAG51:3-FA18:2	-1.16808	0.518377	-2.25334	0.0242376		Anova	model.00	4	40.544	46.649	-16.2718	32.544	model.01	5	22.945	30.576	-6.4723	12.945	19.599	1	9.552e-06	sig	0
Single_Model	TAG51:4-FA15:0	-1.13433	0.495147	-2.29089	0.02197		Anova	model.00	4	40.544	46.649	-16.272	32.544	model.01	5	25.02	32.652	-7.51	15.02	17.524	1	2.837e-05	sig	0
Single_Model	TAG51:4-FA16:1	-1.2589	0.478952	-2.62845	0.00857755		Anova	model.00	4	40.544	46.649	-16.2718	32.544	model.01	5	21.195	28.827	-5.5975	11.195	21.349	1	3.829e-06	sig	0
Single_Model	TAG51:4-FA18:2	-1.29182	0.563127	-2.294	0.0217903		Anova	model.00	4	40.544	46.649	-16.2718	32.544	model.01	5	22.057	29.689	-6.0284	12.057	20.487	1	6.004e-06	sig	0
Single_Model	TAG52:0-FA16:0	-1.39955	0.588519	-2.37809	0.0174026		Anova	model.00	4	40.544	46.649	-16.2718	32.544	model.01	5	24.067	31.698	-7.0333	14.067	18.477	1	1.72e-05	sig	0
Single_Model	TAG52:0-FA18:0	-1.42997	0.58484	-2.44507	0.0144825		Anova	model.00	4	40.544	46.649	-16.2718	32.544	model.01	5	24.609	32.241	-7.3045	14.609	17.935	1	2.286e-05	sig	0
Single_Model	TAG52:0-FA20:0	-1.06677	0.427915	-2.49294	0.0126689		Anova	model.00	4	40.544	46.649	-16.272	32.544	model.01	5	30.091	37.723	-10.046	20.091	12.452	1	0.0004175	sig	0
Single_Model	TAG52:1-FA16:0	-1.29068	0.577045	-2.2367	0.0253061		Anova	model.00	4	40.544	46.649	-16.2718	32.544	model.01	5	22.263	29.895	-6.1315	12.263	20.281	1	6.688e-06	sig	0
Single_Model	TAG52:1-FA16:1	-1.20905	0.534774	-2.26087	0.0237672		Anova	model.00	4	40.544	46.649	-16.2718	32.544	model.01	5	23.606	31.238	-6.8032	13.606	18.937	1	1.351e-05	sig	0
Single_Model	TAG52:1-FA18:0	-1.35543	0.621474	-2.18099	0.0291838		Anova	model.00	4	40.544	46.649	-16.2718	32.544	model.01	5	22.477	30.108	-6.2383	12.477	20.067	1	7.477e-06	sig	0
Single_Model	TAG52:1-FA18:1	-1.25723	0.568013	-2.21339	0.0268707		Anova	model.00	4	40.544	46.649	-16.2718	32.544	model.01	5	22.451	30.083	-6.2256	12.451	20.093	1	7.378e-06	sig	0
Single_Model	TAG52:1-FA20:0	-1.17688	0.464994	-2.53097	0.0113749		Anova	model.00	4	40.544	46.649	-16.2718	32.544	model.01	5	24.398	32.03	-7.1992	14.398	18.145	1	2.047e-05	sig	0
Single_Model	TAG52:1-FA20:1	-1.12698	0.44101	-2.55546	0.0106047		Anova	model.00	4	40.544	46.649	-16.2718	32.544	model.01	5	25.423	33.054	-7.7113	15.423	17.121	1	3.507e-05	sig	0
Single_Model	TAG52:2-FA16:0	-1.19542	0.552825	-2.16238	0.0305889		Anova	model.00	4	40.544	46.649	-16.2718	32.544	model.01	5	22.528	30.159	-6.2638	12.528	20.016	1	7.679e-06	sig	0
Single_Model	TAG52:2-FA16:1	-1.24922	0.572406	-2.1824	0.0290798		Anova	model.00	4	40.544	46.649	-16.2718	32.544	model.01	5	21.514	29.146	-5.7571	11.514	21.029	1	4.523e-06	sig	0
Single_Model	TAG52:2-FA18:0	-1.32639	0.613864	-2.16073	0.0307163		Anova	model.00	4	40.544	46.649	-16.2718	32.544	model.01	5	23.369	31.001	-6.6844	13.369	19.175	1	1.193e-05	sig	0
Single_Model	TAG52:2-FA18:1	-1.21214	0.565501	-2.14348	0.0320749		Anova	model.00	4	40.544	46.649	-16.272	32.544	model.01	5	22.148	29.78	-6.074	12.148	20.396	1	6.297e-06	sig	0
Single_Model	TAG52:2-FA18:2	-1.25209	0.559752	-2.23686	0.0252955		Anova	model.00	4	40.544	46.649	-16.2718	32.544	model.01	5	23.373	31.004	-6.6863	13.373	19.171	1	1.195e-05	sig	0
Single_Model	TAG52:2-FA20:1	-0.926242	0.399525	-2.31836	0.0204298		Anova	model.00	4	40.544	46.649	-16.2718	32.544	model.01	5	24.894	32.525	-7.4468	14.894	17.65	1	2.655e-05	sig	0
Single_Model	TAG52:2-FA20:2	-1.12905	0.46856	-2.40962	0.0159691		Anova	model.00	4	40.544	46.649	-16.2718	32.544	model.01	5	25.778	33.41	-7.8889	15.778	16.766	1	4.229e-05	sig	0
Single_Model	TAG52:3-FA14:0	-1.04253	0.453214	-2.3003	0.0214311		Anova	model.00	4	40.544	46.649	-16.2718	32.544	model.01	5	24.124	31.755	-7.0618	14.124	18.42	1	1.772e-05	sig	0
Single_Model	TAG52:3-FA16:0	-1.22052	0.572358	-2.13244	0.0329704		Anova	model.00	4	40.544	46.649	-16.2718	32.544	model.01	5	22.451	30.083	-6.2257	12.451	20.092	1	7.38e-06	sig	0
Single_Model	TAG52:3-FA16:1	-1.15137	0.540333	-2.13084	0.0331021		Anova	model.00	4	40.544	46.649	-16.2718	32.544	model.01	5	22.029	29.661	-6.0147	12.029	20.514	1	5.919e-06	sig	0
Single_Model	TAG52:3-FA18:0	-1.34423	0.646201	-2.0802	0.037507		Anova	model.00	4	40.544	46.649	-16.2718	32.544	model.01	5	21.974	29.606	-5.9872	11.974	20.569	1	5.751e-06	sig	0
Single_Model	TAG52:3-FA18:1	-1.21892	0.579219	-2.10442	0.035342		Anova	model.00	4	40.544	46.649	-16.2718	32.544	model.01	5	22.277	29.909	-6.1384	12.277	20.267	1	6.736e-06	sig	0
Single_Model	TAG52:3-FA18:2	-1.22248	0.570634	-2.14233	0.0321673		Anova	model.00	4	40.544	46.649	-16.2718	32.544	model.01	5	22.39	30.022	-6.1951	12.39	20.153	1	7.147e-06	sig	0
Single_Model	TAG52:3-FA18:3	-1.21704	0.561713	-2.16665	0.0302614		Anova	model.00	4	40.544	46.649	-16.2718	32.544	model.01	5	22.713	30.344	-6.3563	12.713	19.831	1	8.46e-06	sig	0
Single_Model	TAG52:3-FA20:2	-0.852012	0.368559	-2.31174	0.0207923		Anova	model.00	4	40.544	46.649	-16.2718	32.544	model.01	5	25.458	33.09	-7.7292	15.458	17.085	1	3.574e-05	sig	0
Single_Model	TAG52:3-FA20:3	-1.11675	0.409458	-2.7274	0.0063836		Anova	model.00	4	40.544	46.649	-16.272	32.544	model.01	5	25.924	33.556	-7.962	15.924	16.62	1	4.567e-05	sig	0
Single_Model	TAG52:4-FA14:0	-1.11886	0.443033	-2.52545	0.011555		Anova	model.00	4	40.544	46.649	-16.2718	32.544	model.01	5	21.267	28.899	-5.6336	11.267	21.276	1	3.976e-06	sig	0
Single_Model	TAG52:4-FA16:0	-1.25461	0.584508	-2.14644	0.0318383		Anova	model.00	4	40.544	46.649	-16.2718	32.544	model.01	5	22.525	30.157	-6.2625	12.525	20.019	1	7.669e-06	sig	0
Single_Model	TAG52:4-FA16:1	-1.1702	0.552872	-2.11659	0.034295		Anova	model.00	4	40.544	46.649	-16.272	32.544	model.01	5	22.198	29.83	-6.099	12.198	20.346	1	6.464e-06	sig	0
Single_Model	TAG52:4-FA18:1	-1.19714	0.572359	-2.09159	0.0364756		Anova	model.00	4	40.544	46.649	-16.2718	32.544	model.01	5	22.103	29.735	-6.0516	12.103	20.441	1	6.151e-06	sig	0
Single_Model	TAG52:4-FA18:2	-1.23172	0.578613	-2.12875	0.0332753		Anova	model.00	4	40.544	46.649	-16.272	32.544	model.01	5	22.742	30.374	-6.371	12.742	19.802	1	8.591e-06	sig	0
Single_Model	TAG52:4-FA18:3	-1.24387	0.591006	-2.10467	0.0353203		Anova	model.00	4	40.544	46.649	-16.2718	32.544	model.01	5	22.093	29.725	-6.0464	12.093	20.451	1	6.118e-06	sig	0
Single_Model	TAG52:4-FA20:3	-1.00742	0.401837	-2.50704	0.0121747		Anova	model.00	4	40.544	46.649	-16.2718	32.544	model.01	5	23.111	30.742	-6.5553	13.111	19.433	1	1.042e-05	sig	0
Single_Model	TAG52:4-FA20:4	-1.06341	0.380018	-2.79831	0.00513706		Anova	model.00	4	40.544	46.649	-16.2718	32.544	model.01	5	24.33	31.962	-7.1651	14.33	18.213	1	1.975e-05	sig	0
Single_Model	TAG52:5-FA16:0	-1.23895	0.577034	-2.1471	0.0317857		Anova	model.00	4	40.544	46.649	-16.2718	32.544	model.01	5	21.867	29.499	-5.9335	11.867	20.677	1	5.437e-06	sig	0
Single_Model	TAG52:5-FA16:1	-1.19667	0.546658	-2.18907	0.0285918		Anova	model.00	4	40.544	46.649	-16.272	32.544	model.01	5	22.328	29.96	-6.164	12.328	20.216	1	6.919e-06	sig	0
Single_Model	TAG52:5-FA18:1	-1.25712	0.579914	-2.16778	0.0301757		Anova	model.00	4	40.544	46.649	-16.2718	32.544	model.01	5	21.395	29.027	-5.6976	11.395	21.148	1	4.251e-06	sig	0
Single_Model	TAG52:5-FA18:2	-1.22021	0.572758	-2.13041	0.0331381		Anova	model.00	4	40.544	46.649	-16.2718	32.544	model.01	5	22.281	29.912	-6.1403	12.281	20.263	1	6.749e-06	sig	0
Single_Model	TAG52:5-FA18:3	-1.22159	0.587148	-2.08055	0.0374749		Anova	model.00	4	40.544	46.649	-16.272	32.544	model.01	5	22.48	30.112	-6.24	12.48	20.064	1	7.49e-06	sig	0
Single_Model	TAG52:5-FA20:4	-0.963644	0.379526	-2.53907	0.0111147		Anova	model.00	4	40.544	46.649	-16.2718	32.544	model.01	5	22.741	30.372	-6.3703	12.741	19.803	1	8.584e-06	sig	0
Single_Model	TAG52:5-FA20:5	-1.15387	0.415736	-2.77549	0.00551188		Anova	model.00	4	40.544	46.649	-16.2718	32.544	model.01	5	22.706	30.338	-6.3529	12.706	19.838	1	8.43e-06	sig	0
Single_Model	TAG52:5-FA22:5	-1.14101	0.459257	-2.48446	0.0129747		Anova	model.00	4	40.544	46.649	-16.2718	32.544	model.01	5	21.313	28.945	-5.6566	11.313	21.23	1	4.072e-06	sig	0
Single_Model	TAG52:6-FA16:0	-1.2826	0.499501	-2.56775	0.010236		Anova	model.00	4	40.544	46.649	-16.2718	32.544	model.01	5	21.457	29.088	-5.7283	11.457	21.087	1	4.389e-06	sig	0
Single_Model	TAG52:6-FA18:2	-1.25129	0.58682	-2.13232	0.0329806		Anova	model.00	4	40.544	46.649	-16.2718	32.544	model.01	5	22.376	30.008	-6.1882	12.376	20.167	1	7.096e-06	sig	0
Single_Model	TAG52:6-FA18:3	-1.22485	0.598497	-2.04654	0.0407033		Anova	model.00	4	40.544	46.649	-16.272	32.544	model.01	5	22.148	29.78	-6.074	12.148	20.396	1	6.297e-06	sig	0
Single_Model	TAG52:6-FA20:4	-1.03131	0.429386	-2.40182	0.0163139		Anova	model.00	4	40.544	46.649	-16.2718	32.544	model.01	5	22.441	30.073	-6.2205	12.441	20.103	1	7.34e-06	sig	0
Single_Model	TAG52:6-FA22:6	-1.21111	0.520996	-2.32461	0.0200928		Anova	model.00	4	40.544	46.649	-16.2718	32.544	model.01	5	21.823	29.455	-5.9116	11.823	20.72	1	5.315e-06	sig	0
Single_Model	TAG52:7-FA16:0	-1.27363	0.458625	-2.77706	0.00548532		Anova	model.00	4	40.544	46.649	-16.2718	32.544	model.01	5	26.135	33.767	-8.0675	16.135	16.409	1	5.105e-05	sig	0
Single_Model	TAG52:7-FA18:1	-1.26613	0.535915	-2.36256	0.018149		Anova	model.00	4	40.544	46.649	-16.2718	32.544	model.01	5	23.282	30.914	-6.6409	13.282	19.262	1	1.14e-05	sig	0
Single_Model	TAG52:8-FA16:1	-1.17541	0.455721	-2.57922	0.00990239		Anova	model.00	4	40.544	46.649	-16.2718	32.544	model.01	5	24.062	31.694	-7.0309	14.062	18.482	1	1.715e-05	sig	0
Single_Model	TAG53:0-FA16:0	-1.30363	0.462894	-2.81625	0.00485873		Anova	model.00	4	40.544	46.649	-16.2718	32.544	model.01	5	25.797	33.429	-7.8985	15.797	16.747	1	4.272e-05	sig	0
Single_Model	TAG53:1-FA16:0	-1.13124	0.403717	-2.80207	0.00507762		Anova	model.00	4	40.544	46.649	-16.2718	32.544	model.01	5	23.818	31.45	-6.9091	13.818	18.726	1	1.51e-05	sig	0
Single_Model	TAG53:1-FA17:0	-1.3947	0.626247	-2.22708	0.0259422		Anova	model.00	4	40.544	46.649	-16.2718	32.544	model.01	5	23.033	30.665	-6.5167	13.033	19.51	1	1.001e-05	sig	0
Single_Model	TAG53:1-FA18:0	-1.38425	0.603221	-2.29476	0.021747		Anova	model.00	4	40.544	46.649	-16.2718	32.544	model.01	5	23.395	31.027	-6.6975	13.395	19.149	1	1.209e-05	sig	0
Single_Model	TAG53:1-FA18:1	-1.33626	0.54232	-2.46398	0.0137405		Anova	model.00	4	40.544	46.649	-16.2718	32.544	model.01	5	22.165	29.797	-6.0824	12.165	20.379	1	6.353e-06	sig	0
Single_Model	TAG53:2-FA16:0	-1.10923	0.439101	-2.52614	0.0115323		Anova	model.00	4	40.544	46.649	-16.272	32.544	model.01	5	22.66	30.292	-6.33	12.66	19.884	1	8.23e-06	sig	0
Single_Model	TAG53:2-FA17:0	-1.32795	0.617249	-2.1514	0.0314446		Anova	model.00	4	40.544	46.649	-16.2718	32.544	model.01	5	21.913	29.545	-5.9565	11.913	20.631	1	5.569e-06	sig	0
Single_Model	TAG53:2-FA18:1	-1.33933	0.580436	-2.30745	0.0210295		Anova	model.00	4	40.544	46.649	-16.2718	32.544	model.01	5	20.903	28.535	-5.4517	10.903	21.64	1	3.289e-06	sig	0
Single_Model	TAG53:2-FA18:2	-1.37	0.562952	-2.43361	0.0149492		Anova	model.00	4	40.544	46.649	-16.2718	32.544	model.01	5	23.561	31.193	-6.7806	13.561	18.983	1	1.319e-05	sig	0
Single_Model	TAG53:3-FA16:0	-1.16988	0.457598	-2.55657	0.010571		Anova	model.00	4	40.544	46.649	-16.2718	32.544	model.01	5	21.268	28.9	-5.6342	11.268	21.275	1	3.979e-06	sig	0
Single_Model	TAG53:3-FA17:0	-1.37932	0.656054	-2.10245	0.0355142		Anova	model.00	4	40.544	46.649	-16.2718	32.544	model.01	5	21.723	29.355	-5.8617	11.723	20.82	1	5.044e-06	sig	0
Single_Model	TAG53:3-FA18:2	-1.33372	0.613797	-2.1729	0.029788		Anova	model.00	4	40.544	46.649	-16.2718	32.544	model.01	5	21.898	29.53	-5.9489	11.898	20.646	1	5.525e-06	sig	0
Single_Model	TAG53:4-FA16:0	-1.24472	0.461154	-2.69913	0.00695201		Anova	model.00	4	40.544	46.649	-16.2718	32.544	model.01	5	21.746	29.378	-5.8731	11.746	20.797	1	5.105e-06	sig	0
Single_Model	TAG53:4-FA17:0	-1.20735	0.552623	-2.18477	0.0289059		Anova	model.00	4	40.544	46.649	-16.2718	32.544	model.01	5	24.019	31.651	-7.0096	14.019	18.524	1	1.677e-05	sig	0
Single_Model	TAG53:4-FA18:2	-1.49374	0.588353	-2.53885	0.0111218		Anova	model.00	4	40.544	46.649	-16.2718	32.544	model.01	5	20.275	27.907	-5.1376	10.275	22.268	1	2.371e-06	sig	0
Single_Model	TAG53:4-FA20:4	-1.43103	0.508444	-2.81452	0.00488499		Anova	model.00	4	40.544	46.649	-16.2718	32.544	model.01	5	25.601	33.233	-7.8006	15.601	16.942	1	3.853e-05	sig	0
Single_Model	TAG53:5-FA20:4	-1.16379	0.424093	-2.7442	0.0060659		Anova	model.00	4	40.544	46.649	-16.272	32.544	model.01	5	21.676	29.308	-5.838	11.676	20.868	1	4.921e-06	sig	0
Single_Model	TAG54:0-FA16:0	-1.35361	0.510387	-2.65212	0.00799875		Anova	model.00	4	40.544	46.649	-16.2718	32.544	model.01	5	28.416	36.047	-9.2078	18.416	14.128	1	0.0001708	sig	0
Single_Model	TAG54:0-FA18:0	-1.66795	0.762727	-2.18683	0.028755		Anova	model.00	4	40.544	46.649	-16.272	32.544	model.01	5	31.915	39.546	-10.957	21.915	10.629	1	0.001113	sig	0
Single_Model	TAG54:1-FA16:0	-1.27314	0.472704	-2.69332	0.00707446		Anova	model.00	4	40.544	46.649	-16.2718	32.544	model.01	5	24.089	31.721	-7.0445	14.089	18.455	1	1.74e-05	sig	0
Single_Model	TAG54:1-FA18:0	-1.97519	0.997576	-1.97999	0.0477051		Anova	model.00	4	40.544	46.649	-16.2718	32.544	model.01	5	19.893	27.525	-4.9464	9.893	22.651	1	1.943e-06	sig	0
Single_Model	TAG54:1-FA18:1	-1.69917	0.761972	-2.22996	0.0257502		Anova	model.00	4	40.544	46.649	-16.272	32.544	model.01	5	19.844	27.476	-4.922	9.844	22.7	1	1.894e-06	sig	0
Single_Model	TAG54:1-FA20:0	-1.21523	0.477986	-2.5424	0.0110094		Anova	model.00	4	40.544	46.649	-16.2718	32.544	model.01	5	25.346	32.978	-7.6729	15.346	17.198	1	3.368e-05	sig	0
Single_Model	TAG54:1-FA20:1	-1.22169	0.478443	-2.55347	0.0106654		Anova	model.00	4	40.544	46.649	-16.2718	32.544	model.01	5	23.583	31.215	-6.7914	13.583	18.961	1	1.334e-05	sig	0
Single_Model	TAG54:2-FA16:0	-1.1307	0.461621	-2.44942	0.0143088		Anova	model.00	4	40.544	46.649	-16.2718	32.544	model.01	5	23.478	31.11	-6.7389	13.478	19.066	1	1.263e-05	sig	0
Single_Model	TAG54:2-FA18:0	-1.71451	0.841382	-2.03773	0.0415765		Anova	model.00	4	40.544	46.649	-16.2718	32.544	model.01	5	20.317	27.949	-5.1587	10.317	22.226	1	2.423e-06	sig	0
Single_Model	TAG54:2-FA18:1	-1.50648	0.711883	-2.1162	0.0343282		Anova	model.00	4	40.544	46.649	-16.2718	32.544	model.01	5	20.332	27.963	-5.1658	10.332	22.212	1	2.441e-06	sig	0
Single_Model	TAG54:2-FA18:2	-1.7772	0.902633	-1.96891	0.048964		Anova	model.00	4	40.544	46.649	-16.272	32.544	model.01	5	21.528	29.16	-5.764	11.528	21.016	1	4.555e-06	sig	0
Single_Model	TAG54:2-FA20:0	-1.27354	0.496652	-2.56426	0.0103397		Anova	model.00	4	40.544	46.649	-16.2718	32.544	model.01	5	25.523	33.155	-7.7614	15.523	17.021	1	3.697e-05	sig	0
Single_Model	TAG54:2-FA20:1	-1.10936	0.453484	-2.4463	0.0144331		Anova	model.00	4	40.544	46.649	-16.2718	32.544	model.01	5	22.901	30.533	-6.4504	12.901	19.643	1	9.335e-06	sig	0
Single_Model	TAG54:2-FA20:2	-1.226	0.487725	-2.51372	0.0119465		Anova	model.00	4	40.544	46.649	-16.272	32.544	model.01	5	24.528	32.16	-7.264	14.528	18.016	1	2.191e-05	sig	0
Single_Model	TAG54:3-FA16:0	-1.1279	0.463526	-2.4333	0.0149619		Anova	model.00	4	40.544	46.649	-16.2718	32.544	model.01	5	23.385	31.017	-6.6924	13.385	19.159	1	1.203e-05	sig	0
Single_Model	TAG54:3-FA16:1	-1.12302	0.457623	-2.45402	0.0141267		Anova	model.00	4	40.544	46.649	-16.2718	32.544	model.01	5	21.984	29.616	-5.9922	11.984	20.559	1	5.781e-06	sig	0
Single_Model	TAG54:3-FA18:0	-1.78423	0.898349	-1.98612	0.0470195		Anova	model.00	4	40.544	46.649	-16.2718	32.544	model.01	5	19.835	27.467	-4.9175	9.835	22.709	1	1.885e-06	sig	0
Single_Model	TAG54:3-FA18:1	-1.36838	0.642706	-2.12909	0.0332466		Anova	model.00	4	40.544	46.649	-16.2718	32.544	model.01	5	20.429	28.061	-5.2144	10.429	22.115	1	2.568e-06	sig	0
Single_Model	TAG54:3-FA18:2	-1.61195	0.778366	-2.07094	0.0383646		Anova	model.00	4	40.544	46.649	-16.2718	32.544	model.01	5	20.209	27.841	-5.1046	10.209	22.334	1	2.291e-06	sig	0
Single_Model	TAG54:3-FA20:1	-1.1281	0.475594	-2.37197	0.0176934		Anova	model.00	4	40.544	46.649	-16.2718	32.544	model.01	5	22.793	30.425	-6.3966	12.793	19.75	1	8.825e-06	sig	0
Single_Model	TAG54:3-FA20:2	-1.12273	0.47093	-2.38406	0.0171228		Anova	model.00	4	40.544	46.649	-16.2718	32.544	model.01	5	22.573	30.205	-6.2864	12.573	19.971	1	7.863e-06	sig	0
Single_Model	TAG54:3-FA20:3	-1.27806	0.470892	-2.71413	0.00664503		Anova	model.00	4	40.544	46.649	-16.2718	32.544	model.01	5	24.612	32.244	-7.3061	14.612	17.931	1	2.29e-05	sig	0
Single_Model	TAG54:4-FA16:0	-1.12422	0.446208	-2.51951	0.011752		Anova	model.00	4	40.544	46.649	-16.2718	32.544	model.01	5	22.854	30.485	-6.4268	12.854	19.69	1	9.107e-06	sig	0
Single_Model	TAG54:4-FA16:1	-1.1431	0.481647	-2.37333	0.0176286		Anova	model.00	4	40.544	46.649	-16.2718	32.544	model.01	5	22.064	29.696	-6.0319	12.064	20.48	1	6.026e-06	sig	0
Single_Model	TAG54:4-FA18:0	-1.83556	0.923322	-1.988	0.0468118		Anova	model.00	4	40.544	46.649	-16.2718	32.544	model.01	5	20.12	27.752	-5.0602	10.12	22.423	1	2.187e-06	sig	0
Single_Model	TAG54:4-FA18:1	-1.39878	0.665213	-2.10275	0.0354877		Anova	model.00	4	40.544	46.649	-16.272	32.544	model.01	5	20.75	28.382	-5.375	10.75	21.794	1	3.036e-06	sig	0
Single_Model	TAG54:4-FA18:2	-1.43281	0.679992	-2.1071	0.035109		Anova	model.00	4	40.544	46.649	-16.2718	32.544	model.01	5	20.784	28.416	-5.3919	10.784	21.76	1	3.09e-06	sig	0
Single_Model	TAG54:4-FA18:3	-1.5967	0.788291	-2.02552	0.0428143		Anova	model.00	4	40.544	46.649	-16.2718	32.544	model.01	5	20.345	27.977	-5.1726	10.345	22.198	1	2.459e-06	sig	0
Single_Model	TAG54:4-FA20:2	-1.13614	0.493713	-2.30121	0.0213796		Anova	model.00	4	40.544	46.649	-16.2718	32.544	model.01	5	23.111	30.743	-6.5554	13.111	19.433	1	1.042e-05	sig	0
Single_Model	TAG54:4-FA20:3	-1.12426	0.445348	-2.52445	0.011588		Anova	model.00	4	40.544	46.649	-16.272	32.544	model.01	5	22.328	29.96	-6.164	12.328	20.216	1	6.918e-06	sig	0
Single_Model	TAG54:4-FA20:4	-1.26785	0.468201	-2.70793	0.00677052		Anova	model.00	4	40.544	46.649	-16.2718	32.544	model.01	5	22.614	30.246	-6.3071	12.614	19.929	1	8.035e-06	sig	0
Single_Model	TAG54:4-FA22:4	-1.06614	0.397761	-2.68035	0.00735449		Anova	model.00	4	40.544	46.649	-16.2718	32.544	model.01	5	23.206	30.838	-6.6029	13.206	19.338	1	1.095e-05	sig	0
Single_Model	TAG54:5-FA16:0	-1.1076	0.415621	-2.66494	0.00770025		Anova	model.00	4	40.544	46.649	-16.2718	32.544	model.01	5	21.647	29.279	-5.8235	11.647	20.897	1	4.847e-06	sig	0
Single_Model	TAG54:5-FA16:1	-1.09285	0.437515	-2.49785	0.0124948		Anova	model.00	4	40.544	46.649	-16.2718	32.544	model.01	5	22.472	30.104	-6.2358	12.472	20.072	1	7.458e-06	sig	0
Single_Model	TAG54:5-FA18:0	-1.70875	0.8417	-2.03012	0.0423446		Anova	model.00	4	40.544	46.649	-16.2718	32.544	model.01	5	19.523	27.155	-4.7617	9.523	23.02	1	1.603e-06	sig	0
Single_Model	TAG54:5-FA18:1	-1.42644	0.668002	-2.13539	0.0327295		Anova	model.00	4	40.544	46.649	-16.2718	32.544	model.01	5	20.701	28.333	-5.3505	10.701	21.843	1	2.959e-06	sig	0
Single_Model	TAG54:5-FA18:2	-1.45078	0.683075	-2.12389	0.0336793		Anova	model.00	4	40.544	46.649	-16.272	32.544	model.01	5	20.894	28.526	-5.447	10.894	21.65	1	3.273e-06	sig	0
Single_Model	TAG54:5-FA18:3	-1.41223	0.681863	-2.07114	0.038346		Anova	model.00	4	40.544	46.649	-16.2718	32.544	model.01	5	20.672	28.304	-5.3362	10.672	21.871	1	2.916e-06	sig	0
Single_Model	TAG54:5-FA20:2	-1.17101	0.496217	-2.35988	0.0182807		Anova	model.00	4	40.544	46.649	-16.2718	32.544	model.01	5	22.544	30.176	-6.2721	12.544	20	1	7.746e-06	sig	0
Single_Model	TAG54:5-FA20:3	-1.12615	0.452043	-2.49124	0.0127298		Anova	model.00	4	40.544	46.649	-16.2718	32.544	model.01	5	22.724	30.355	-6.3618	12.724	19.82	1	8.508e-06	sig	0
Single_Model	TAG54:5-FA20:4	-1.08598	0.418604	-2.59428	0.00947898		Anova	model.00	4	40.544	46.649	-16.2718	32.544	model.01	5	21.834	29.466	-5.9171	11.834	20.709	1	5.345e-06	sig	0
Single_Model	TAG54:5-FA22:4	-0.981145	0.387828	-2.52984	0.0114114		Anova	model.00	4	40.544	46.649	-16.272	32.544	model.01	5	22.488	30.12	-6.244	12.488	20.056	1	7.522e-06	sig	0
Single_Model	TAG54:5-FA22:5	-1.19435	0.438993	-2.72066	0.00651523		Anova	model.00	4	40.544	46.649	-16.2718	32.544	model.01	5	22.682	30.314	-6.3412	12.682	19.861	1	8.327e-06	sig	0
Single_Model	TAG54:6-FA16:0	-1.13889	0.386489	-2.94676	0.0032112		Anova	model.00	4	40.544	46.649	-16.272	32.544	model.01	5	20.242	27.874	-5.121	10.242	22.302	1	2.33e-06	sig	0
Single_Model	TAG54:6-FA16:1	-1.04618	0.419673	-2.49285	0.0126721		Anova	model.00	4	40.544	46.649	-16.2718	32.544	model.01	5	22.41	30.042	-6.2051	12.41	20.133	1	7.222e-06	sig	0
Single_Model	TAG54:6-FA18:1	-1.4129	0.670247	-2.10803	0.0350283		Anova	model.00	4	40.544	46.649	-16.2718	32.544	model.01	5	20.568	28.2	-5.2842	10.568	21.975	1	2.762e-06	sig	0
Single_Model	TAG54:6-FA18:2	-1.4744	0.678267	-2.17377	0.0297225		Anova	model.00	4	40.544	46.649	-16.2718	32.544	model.01	5	21.188	28.819	-5.5938	11.188	21.356	1	3.814e-06	sig	0
Single_Model	TAG54:6-FA18:3	-1.44767	0.7039	-2.05664	0.0397204		Anova	model.00	4	40.544	46.649	-16.2718	32.544	model.01	5	20.787	28.419	-5.3935	10.787	21.757	1	3.095e-06	sig	0
Single_Model	TAG54:6-FA20:3	-1.14671	0.462754	-2.47801	0.0132116		Anova	model.00	4	40.544	46.649	-16.2718	32.544	model.01	5	22.262	29.893	-6.1308	12.262	20.282	1	6.683e-06	sig	0
Single_Model	TAG54:6-FA20:4	-1.1001	0.425109	-2.58782	0.00965861		Anova	model.00	4	40.544	46.649	-16.2718	32.544	model.01	5	22.583	30.215	-6.2915	12.583	19.961	1	7.905e-06	sig	0
Single_Model	TAG54:6-FA20:5	-1.15481	0.444219	-2.59965	0.00933183		Anova	model.00	4	40.544	46.649	-16.2718	32.544	model.01	5	21.559	29.19	-5.7793	11.559	20.985	1	4.629e-06	sig	0
Single_Model	TAG54:6-FA22:5	-1.02718	0.426505	-2.40837	0.0160239		Anova	model.00	4	40.544	46.649	-16.2718	32.544	model.01	5	21.788	29.42	-5.8942	11.788	20.755	1	5.219e-06	sig	0
Single_Model	TAG54:6-FA22:6	-1.30168	0.529489	-2.45837	0.0139571		Anova	model.00	4	40.544	46.649	-16.2718	32.544	model.01	5	22.511	30.143	-6.2557	12.511	20.032	1	7.615e-06	sig	0
Single_Model	TAG54:7-FA18:1	-1.34075	0.623075	-2.15183	0.031411		Anova	model.00	4	40.544	46.649	-16.2718	32.544	model.01	5	21.35	28.982	-5.6751	11.35	21.193	1	4.152e-06	sig	0
Single_Model	TAG54:7-FA18:2	-1.3772	0.645981	-2.13196	0.0330104		Anova	model.00	4	40.544	46.649	-16.2718	32.544	model.01	5	21.344	28.976	-5.6722	11.344	21.199	1	4.139e-06	sig	0
Single_Model	TAG54:7-FA18:3	-1.4104	0.641489	-2.19863	0.027904		Anova	model.00	4	40.544	46.649	-16.2718	32.544	model.01	5	20.256	27.888	-5.1282	10.256	22.287	1	2.348e-06	sig	0
Single_Model	TAG54:7-FA20:4	-1.09481	0.426764	-2.56538	0.0103063		Anova	model.00	4	40.544	46.649	-16.2718	32.544	model.01	5	22.542	30.173	-6.2708	12.542	20.002	1	7.736e-06	sig	0
Single_Model	TAG54:7-FA20:5	-1.19088	0.467467	-2.54752	0.0108492		Anova	model.00	4	40.544	46.649	-16.2718	32.544	model.01	5	21.873	29.505	-5.9365	11.873	20.671	1	5.455e-06	sig	0
Single_Model	TAG54:7-FA22:6	-1.16692	0.520859	-2.24037	0.0250668		Anova	model.00	4	40.544	46.649	-16.2718	32.544	model.01	5	22.208	29.84	-6.1041	12.208	20.335	1	6.498e-06	sig	0
Single_Model	TAG55:1-FA16:0	-1.53372	0.579889	-2.64486	0.00817255		Anova	model.00	4	40.544	46.649	-16.2718	32.544	model.01	5	25.666	33.298	-7.8331	15.666	16.877	1	3.987e-05	sig	0
Single_Model	TAG55:1-FA18:1	-1.57598	0.582028	-2.70774	0.00677441		Anova	model.00	4	40.544	46.649	-16.2718	32.544	model.01	5	22.251	29.883	-6.1257	12.251	20.292	1	6.647e-06	sig	0
Single_Model	TAG55:2-FA18:1	-1.38923	0.541784	-2.56419	0.0103418		Anova	model.00	4	40.544	46.649	-16.2718	32.544	model.01	5	20.21	27.841	-5.1048	10.21	22.334	1	2.291e-06	sig	0
Single_Model	TAG55:2-FA18:2	-1.75583	0.693399	-2.5322	0.0113349		Anova	model.00	4	40.544	46.649	-16.2718	32.544	model.01	5	24.366	31.998	-7.1829	14.366	18.178	1	2.012e-05	sig	0
Single_Model	TAG55:3-FA18:1	-1.28249	0.538786	-2.38032	0.0172975		Anova	model.00	4	40.544	46.649	-16.2718	32.544	model.01	5	20.228	27.86	-5.1139	10.228	22.316	1	2.313e-06	sig	0
Single_Model	TAG55:3-FA18:2	-1.47802	0.57522	-2.56949	0.0101848		Anova	model.00	4	40.544	46.649	-16.2718	32.544	model.01	5	20.712	28.344	-5.3561	10.712	21.831	1	2.977e-06	sig	0
Single_Model	TAG55:4-FA18:1	-1.30076	0.577289	-2.25323	0.0242449		Anova	model.00	4	40.544	46.649	-16.2718	32.544	model.01	5	21.115	28.747	-5.5575	11.115	21.429	1	3.672e-06	sig	0
Single_Model	TAG55:4-FA18:2	-1.4285	0.604801	-2.36193	0.0181799		Anova	model.00	4	40.544	46.649	-16.2718	32.544	model.01	5	20.325	27.957	-5.1627	10.325	22.218	1	2.434e-06	sig	0
Single_Model	TAG55:5-FA18:1	-1.44171	0.543628	-2.65202	0.00800107		Anova	model.00	4	40.544	46.649	-16.2718	32.544	model.01	5	20.309	27.941	-5.1544	10.309	22.235	1	2.413e-06	sig	0
Single_Model	TAG55:5-FA18:2	-1.31607	0.616443	-2.13494	0.0327657		Anova	model.00	4	40.544	46.649	-16.2718	32.544	model.01	5	22.206	29.838	-6.1031	12.206	20.337	1	6.492e-06	sig	0
Single_Model	TAG55:5-FA20:4	-1.30433	0.477247	-2.73303	0.00627539		Anova	model.00	4	40.544	46.649	-16.2718	32.544	model.01	5	20.88	28.511	-5.4398	10.88	21.664	1	3.248e-06	sig	0
Single_Model	TAG55:7-FA22:6	-1.59437	0.679118	-2.34771	0.0188892		Anova	model.00	4	40.544	46.649	-16.2718	32.544	model.01	5	22.316	29.948	-6.1582	12.316	20.227	1	6.877e-06	sig	0
Single_Model	TAG56:10-FA18:2	-1.38461	0.613703	-2.25616	0.0240604		Anova	model.00	4	40.544	46.649	-16.2718	32.544	model.01	5	22.018	29.65	-6.0092	12.018	20.525	1	5.885e-06	sig	0
Single_Model	TAG56:1-FA16:0	-1.47444	0.565547	-2.60711	0.009131		Anova	model.00	4	40.544	46.649	-16.2718	32.544	model.01	5	29.727	37.359	-9.8636	19.727	12.816	1	0.0003436	sig	0
Single_Model	TAG56:1-FA18:1	-1.70645	0.65843	-2.5917	0.00955039		Anova	model.00	4	40.544	46.649	-16.272	32.544	model.01	5	27.1	34.732	-8.55	17.1	15.444	1	8.501e-05	sig	0
Single_Model	TAG56:2-FA16:0	-1.15248	0.429181	-2.68531	0.00724631		Anova	model.00	4	40.544	46.649	-16.2718	32.544	model.01	5	27.749	35.381	-8.8745	17.749	14.795	1	0.0001199	sig	0
Single_Model	TAG56:2-FA18:0	-1.57919	0.675462	-2.33794	0.0193906		Anova	model.00	4	40.544	46.649	-16.2718	32.544	model.01	5	22.447	30.079	-6.2236	12.447	20.096	1	7.363e-06	sig	0
Single_Model	TAG56:2-FA20:0	-1.62615	0.697967	-2.32984	0.0198147		Anova	model.00	4	40.544	46.649	-16.2718	32.544	model.01	5	23.048	30.68	-6.5241	13.048	19.495	1	1.008e-05	sig	0
Single_Model	TAG56:2-FA20:1	-1.41777	0.582736	-2.43295	0.0149762		Anova	model.00	4	40.544	46.649	-16.2718	32.544	model.01	5	21.151	28.783	-5.5755	11.151	21.393	1	3.742e-06	sig	0
Single_Model	TAG56:3-FA16:0	-1.0412	0.404153	-2.57626	0.00998742		Anova	model.00	4	40.544	46.649	-16.2718	32.544	model.01	5	27.359	34.991	-8.6795	17.359	15.185	1	9.75e-05	sig	0
Single_Model	TAG56:3-FA18:0	-1.62223	0.707389	-2.29327	0.0218326		Anova	model.00	4	40.544	46.649	-16.2718	32.544	model.01	5	22.248	29.88	-6.1242	12.248	20.295	1	6.637e-06	sig	0
Single_Model	TAG56:3-FA18:1	-1.2923	0.53274	-2.42575	0.0152767		Anova	model.00	4	40.544	46.649	-16.2718	32.544	model.01	5	21.28	28.912	-5.6399	11.28	21.264	1	4.002e-06	sig	0
Single_Model	TAG56:3-FA18:2	-1.54431	0.648485	-2.38142	0.017246		Anova	model.00	4	40.544	46.649	-16.2718	32.544	model.01	5	22.009	29.64	-6.0043	12.009	20.535	1	5.855e-06	sig	0
Single_Model	TAG56:3-FA20:0	-1.65352	0.712223	-2.32163	0.020253		Anova	model.00	4	40.544	46.649	-16.2718	32.544	model.01	5	21.944	29.576	-5.9722	11.944	20.599	1	5.662e-06	sig	0
Single_Model	TAG56:3-FA20:1	-1.26244	0.529994	-2.38199	0.0172195		Anova	model.00	4	40.544	46.649	-16.2718	32.544	model.01	5	21.275	28.907	-5.6374	11.275	21.269	1	3.992e-06	sig	0
Single_Model	TAG56:3-FA20:2	-1.45739	0.648175	-2.24846	0.0245471		Anova	model.00	4	40.544	46.649	-16.2718	32.544	model.01	5	21.578	29.21	-5.7892	11.578	20.965	1	4.677e-06	sig	0
Single_Model	TAG56:4-FA16:0	-1.17246	0.446149	-2.62796	0.00858977		Anova	model.00	4	40.544	46.649	-16.2718	32.544	model.01	5	22.87	30.502	-6.4351	12.87	19.674	1	9.187e-06	sig	0
Single_Model	TAG56:4-FA18:0	-1.54719	0.616136	-2.51111	0.0120353		Anova	model.00	4	40.544	46.649	-16.272	32.544	model.01	5	21.77	29.402	-5.885	11.77	20.774	1	5.169e-06	sig	0
Single_Model	TAG56:4-FA18:1	-1.2719	0.545511	-2.33158	0.0197226		Anova	model.00	4	40.544	46.649	-16.2718	32.544	model.01	5	21.213	28.845	-5.6067	11.213	21.33	1	3.866e-06	sig	0
Single_Model	TAG56:4-FA18:2	-1.36144	0.597457	-2.27872	0.0226836		Anova	model.00	4	40.544	46.649	-16.2718	32.544	model.01	5	21.649	29.281	-5.8246	11.649	20.894	1	4.853e-06	sig	0
Single_Model	TAG56:4-FA20:1	-1.32779	0.575496	-2.30721	0.0210429		Anova	model.00	4	40.544	46.649	-16.2718	32.544	model.01	5	21.179	28.811	-5.5896	11.179	21.364	1	3.798e-06	sig	0
Single_Model	TAG56:4-FA20:2	-1.31562	0.573509	-2.29399	0.0217913		Anova	model.00	4	40.544	46.649	-16.2718	32.544	model.01	5	21.031	28.663	-5.5155	11.031	21.513	1	3.515e-06	sig	0
Single_Model	TAG56:4-FA20:3	-1.44717	0.574322	-2.51978	0.0117428		Anova	model.00	4	40.544	46.649	-16.2718	32.544	model.01	5	21.577	29.209	-5.7884	11.577	20.967	1	4.673e-06	sig	0		****	Remove
Single_Model	TAG56:4-FA20:4	-1.88307	0.720739	-2.61269	0.00898314		Anova	model.00	4	40.544	46.649	-16.2718	32.544	model.01	5	21.487	29.119	-5.7435	11.487	21.057	1	4.459e-06	sig	0
Single_Model	TAG56:4-FA22:4	-1.18852	0.455994	-2.60644	0.00914898		Anova	model.00	4	40.544	46.649	-16.2718	32.544	model.01	5	22.689	30.32	-6.3443	12.689	19.855	1	8.354e-06	sig	0
Single_Model	TAG56:5-FA16:0	-1.07019	0.390934	-2.73751	0.00619053		Anova	model.00	4	40.544	46.649	-16.2718	32.544	model.01	5	20.548	28.18	-5.2741	10.548	21.995	1	2.733e-06	sig	0
Single_Model	TAG56:5-FA18:0	-1.42673	0.517139	-2.75888	0.0057999		Anova	model.00	4	40.544	46.649	-16.2718	32.544	model.01	5	20.366	27.998	-5.1831	10.366	22.177	1	2.486e-06	sig	0
Single_Model	TAG56:5-FA18:1	-1.1959	0.485851	-2.46145	0.0138378		Anova	model.00	4	40.544	46.649	-16.2718	32.544	model.01	5	21.333	28.964	-5.6663	11.333	21.211	1	4.114e-06	sig	0
Single_Model	TAG56:5-FA18:2	-1.36529	0.598537	-2.28105	0.0225453		Anova	model.00	4	40.544	46.649	-16.272	32.544	model.01	5	21.834	29.466	-5.917	11.834	20.71	1	5.345e-06	sig	0
Single_Model	TAG56:5-FA20:1	-1.11747	0.507205	-2.20319	0.0275811		Anova	model.00	4	40.544	46.649	-16.272	32.544	model.01	5	24.596	32.228	-7.298	14.596	17.948	1	2.271e-05	sig	0
Single_Model	TAG56:5-FA20:2	-1.3531	0.615351	-2.19891	0.0278845		Anova	model.00	4	40.544	46.649	-16.2718	32.544	model.01	5	21.646	29.278	-5.8229	11.646	20.898	1	4.844e-06	sig	0
Single_Model	TAG56:5-FA20:3	-1.25727	0.51491	-2.44174	0.0146168		Anova	model.00	4	40.544	46.649	-16.2718	32.544	model.01	5	21.88	29.511	-5.9398	11.88	20.664	1	5.473e-06	sig	0
Single_Model	TAG56:5-FA20:4	-1.42515	0.546878	-2.60598	0.00916128		Anova	model.00	4	40.544	46.649	-16.2718	32.544	model.01	5	21.026	28.658	-5.5129	11.026	21.518	1	3.506e-06	sig	0
Single_Model	TAG56:5-FA22:4	-1.08213	0.428289	-2.52663	0.0115162		Anova	model.00	4	40.544	46.649	-16.2718	32.544	model.01	5	21.663	29.295	-5.8316	11.663	20.881	1	4.888e-06	sig	0
Single_Model	TAG56:5-FA22:5	-1.30769	0.479956	-2.72461	0.00643784		Anova	model.00	4	40.544	46.649	-16.2718	32.544	model.01	5	21.233	28.865	-5.6164	11.233	21.311	1	3.905e-06	sig	0
Single_Model	TAG56:6-FA16:0	-1.05945	0.36869	-2.87355	0.00405886		Anova	model.00	4	40.544	46.649	-16.2718	32.544	model.01	5	19.332	26.963	-4.6658	9.332	23.212	1	1.451e-06	sig	0
Single_Model	TAG56:6-FA18:0	-1.36973	0.471583	-2.90452	0.00367813		Anova	model.00	4	40.544	46.649	-16.2718	32.544	model.01	5	18.917	26.549	-4.4586	8.917	23.626	1	1.17e-06	sig	0
Single_Model	TAG56:6-FA18:1	-1.16944	0.471637	-2.47953	0.0131557		Anova	model.00	4	40.544	46.649	-16.2718	32.544	model.01	5	21.255	28.887	-5.6274	11.255	21.289	1	3.95e-06	sig	0
Single_Model	TAG56:6-FA18:2	-1.24432	0.510059	-2.43956	0.014705		Anova	model.00	4	40.544	46.649	-16.2718	32.544	model.01	5	21.906	29.538	-5.9532	11.906	20.637	1	5.551e-06	sig	0
Single_Model	TAG56:6-FA20:2	-1.19412	0.533023	-2.24027	0.0250734		Anova	model.00	4	40.544	46.649	-16.2718	32.544	model.01	5	23.991	31.623	-6.9957	13.991	18.552	1	1.653e-05	sig	0
Single_Model	TAG56:6-FA20:3	-1.29744	0.532681	-2.43568	0.0148639		Anova	model.00	4	40.544	46.649	-16.272	32.544	model.01	5	21.738	29.37	-5.869	11.738	20.806	1	5.083e-06	sig	0
Single_Model	TAG56:6-FA20:4	-1.24531	0.48106	-2.58869	0.0096343		Anova	model.00	4	40.544	46.649	-16.2718	32.544	model.01	5	21.501	29.133	-5.7504	11.501	21.043	1	4.491e-06	sig	0
Single_Model	TAG56:6-FA20:5	-1.34646	0.502454	-2.67976	0.00736744		Anova	model.00	4	40.544	46.649	-16.2718	32.544	model.01	5	20.336	27.967	-5.1678	10.336	22.208	1	2.447e-06	sig	0
Single_Model	TAG56:6-FA22:4	-1.10399	0.458304	-2.40886	0.0160025		Anova	model.00	4	40.544	46.649	-16.2718	32.544	model.01	5	22.207	29.839	-6.1035	12.207	20.337	1	6.495e-06	sig	0
Single_Model	TAG56:6-FA22:5	-1.10985	0.445906	-2.48897	0.0128114		Anova	model.00	4	40.544	46.649	-16.272	32.544	model.01	5	20.55	28.182	-5.275	10.55	21.994	1	2.735e-06	sig	0
Single_Model	TAG56:6-FA22:6	-1.45601	0.597091	-2.4385	0.0147484		Anova	model.00	4	40.544	46.649	-16.2718	32.544	model.01	5	21.365	28.997	-5.6824	11.365	21.179	1	4.184e-06	sig	0
Single_Model	TAG56:7-FA16:0	-1.34423	0.545713	-2.46326	0.0137679		Anova	model.00	4	40.544	46.649	-16.272	32.544	model.01	5	23.126	30.758	-6.563	13.126	19.418	1	1.05e-05	sig	0
Single_Model	TAG56:7-FA18:0	-2.03036	0.772724	-2.62753	0.00860071		Anova	model.00	4	40.544	46.649	-16.2718	32.544	model.01	5	21.884	29.515	-5.9418	11.884	20.66	1	5.485e-06	sig	0
Single_Model	TAG56:7-FA18:1	-1.28926	0.522281	-2.46851	0.0135676		Anova	model.00	4	40.544	46.649	-16.2718	32.544	model.01	5	21.111	28.743	-5.5557	11.111	21.432	1	3.665e-06	sig	0
Single_Model	TAG56:7-FA18:2	-1.24093	0.500977	-2.47701	0.0132489		Anova	model.00	4	40.544	46.649	-16.2718	32.544	model.01	5	21.915	29.547	-5.9575	11.915	20.629	1	5.576e-06	sig	0
Single_Model	TAG56:7-FA20:3	-1.3488	0.52897	-2.54985	0.0107769		Anova	model.00	4	40.544	46.649	-16.2718	32.544	model.01	5	22.788	30.42	-6.3939	12.788	19.756	1	8.799e-06	sig	0
Single_Model	TAG56:7-FA20:4	-1.31149	0.509003	-2.57658	0.00997834		Anova	model.00	4	40.544	46.649	-16.2718	32.544	model.01	5	22.291	29.923	-6.1455	12.291	20.253	1	6.786e-06	sig	0
Single_Model	TAG56:7-FA20:5	-1.3083	0.503504	-2.5984	0.0093659		Anova	model.00	4	40.544	46.649	-16.2718	32.544	model.01	5	20.281	27.912	-5.1403	10.281	22.263	1	2.377e-06	sig	0
Single_Model	TAG56:7-FA22:5	-1.15241	0.484565	-2.37824	0.0173953		Anova	model.00	4	40.544	46.649	-16.2718	32.544	model.01	5	21.249	28.881	-5.6245	11.249	21.295	1	3.938e-06	sig	0
Single_Model	TAG56:7-FA22:6	-1.28809	0.556259	-2.31564	0.0205781		Anova	model.00	4	40.544	46.649	-16.2718	32.544	model.01	5	20.986	28.618	-5.4931	10.986	21.558	1	3.434e-06	sig	0
Single_Model	TAG56:8-FA16:0	-1.54165	0.581414	-2.65156	0.00801216		Anova	model.00	4	40.544	46.649	-16.2718	32.544	model.01	5	24.349	31.981	-7.1747	14.349	18.194	1	1.995e-05	sig	0
Single_Model	TAG56:8-FA18:1	-1.53667	0.580079	-2.64907	0.00807128		Anova	model.00	4	40.544	46.649	-16.2718	32.544	model.01	5	21.905	29.537	-5.9527	11.905	20.638	1	5.547e-06	sig	0
Single_Model	TAG56:8-FA18:2	-1.36348	0.569318	-2.39494	0.016623		Anova	model.00	4	40.544	46.649	-16.2718	32.544	model.01	5	22.054	29.686	-6.0269	12.054	20.49	1	5.995e-06	sig	0
Single_Model	TAG56:8-FA20:4	-1.58572	0.54903	-2.88821	0.00387438		Anova	model.00	4	40.544	46.649	-16.2718	32.544	model.01	5	22.647	30.279	-6.3237	12.647	19.896	1	8.176e-06	sig	0
Single_Model	TAG56:8-FA20:5	-1.38401	0.539192	-2.56682	0.0102636		Anova	model.00	4	40.544	46.649	-16.2718	32.544	model.01	5	20.676	28.308	-5.3379	10.676	21.868	1	2.921e-06	sig	0
Single_Model	TAG56:8-FA22:6	-1.34577	0.616156	-2.18414	0.0289519		Anova	model.00	4	40.544	46.649	-16.2718	32.544	model.01	5	22.231	29.862	-6.1153	12.231	20.313	1	6.575e-06	sig	0
Single_Model	TAG56:9-FA20:5	-1.44714	0.531115	-2.72471	0.00643574		Anova	model.00	4	40.544	46.649	-16.2718	32.544	model.01	5	20.753	28.385	-5.3766	10.753	21.791	1	3.041e-06	sig	0
Single_Model	TAG56:9-FA22:6	-1.38636	0.593396	-2.3363	0.0194754		Anova	model.00	4	40.544	46.649	-16.2718	32.544	model.01	5	21.101	28.733	-5.5504	11.101	21.443	1	3.645e-06	sig	0
Single_Model	TAG57:2-FA18:1	-1.99963	0.767208	-2.60637	0.00915077		Anova	model.00	4	40.544	46.649	-16.2718	32.544	model.01	5	21.091	28.723	-5.5455	11.091	21.453	1	3.627e-06	sig	0
Single_Model	TAG57:3-FA18:2	-2.09231	0.794945	-2.63202	0.00848799		Anova	model.00	4	40.544	46.649	-16.2718	32.544	model.01	5	23.167	30.799	-6.5835	13.167	19.377	1	1.073e-05	sig	0
Single_Model	TAG58:10-FA18:2	-2.05762	0.790001	-2.60458	0.00919869		Anova	model.00	4	40.544	46.649	-16.2718	32.544	model.01	5	24.765	32.397	-7.3825	14.765	17.779	1	2.481e-05	sig	0
Single_Model	TAG58:10-FA20:4	-1.57146	0.54473	-2.88484	0.00391613		Anova	model.00	4	40.544	46.649	-16.2718	32.544	model.01	5	27.992	35.624	-8.9961	17.992	14.551	1	0.0001364	sig	0
Single_Model	TAG58:10-FA22:6	-1.70949	0.721313	-2.36996	0.0177898		Anova	model.00	4	40.544	46.649	-16.2718	32.544	model.01	5	20.481	28.112	-5.2403	10.481	22.063	1	2.638e-06	sig	0
Single_Model	TAG58:2-FA18:1	-1.99896	0.748692	-2.66994	0.00758646		Anova	model.00	4	40.544	46.649	-16.2718	32.544	model.01	5	23.045	30.677	-6.5225	13.045	19.499	1	1.007e-05	sig	0
Single_Model	TAG58:3-FA18:1	-1.53208	0.584794	-2.61987	0.00879638		Anova	model.00	4	40.544	46.649	-16.2718	32.544	model.01	5	22.958	30.59	-6.4792	12.958	19.585	1	9.621e-06	sig	0
Single_Model	TAG58:5-FA18:1	-1.38394	0.565937	-2.44539	0.0144696		Anova	model.00	4	40.544	46.649	-16.2718	32.544	model.01	5	21.148	28.779	-5.5738	11.148	21.396	1	3.735e-06	sig	0
Single_Model	TAG58:6-FA16:0	-1.20741	0.394599	-3.05983	0.00221466		Anova	model.00	4	40.544	46.649	-16.2718	32.544	model.01	5	20.9	28.532	-5.4501	10.9	21.643	1	3.283e-06	sig	0
Single_Model	TAG58:6-FA18:0	-1.3285	0.495692	-2.68009	0.00736024		Anova	model.00	4	40.544	46.649	-16.2718	32.544	model.01	5	17.542	25.174	-3.7712	7.542	25.001	1	5.73e-07	sig	0
Single_Model	TAG58:6-FA18:1	-1.23492	0.491576	-2.51217	0.0119991		Anova	model.00	4	40.544	46.649	-16.2718	32.544	model.01	5	20.411	28.043	-5.2055	10.411	22.133	1	2.544e-06	sig	0
Single_Model	TAG58:6-FA20:4	-1.46564	0.510451	-2.87126	0.00408839		Anova	model.00	4	40.544	46.649	-16.2718	32.544	model.01	5	23.455	31.087	-6.7276	13.455	19.088	1	1.248e-05	sig	0
Single_Model	TAG58:6-FA22:4	-1.30151	0.521226	-2.49703	0.0125239		Anova	model.00	4	40.544	46.649	-16.2718	32.544	model.01	5	21.416	29.048	-5.7079	11.416	21.128	1	4.296e-06	sig	0
Single_Model	TAG58:6-FA22:5	-1.52314	0.610063	-2.49668	0.012536		Anova	model.00	4	40.544	46.649	-16.2718	32.544	model.01	5	19.524	27.155	-4.7618	9.524	23.02	1	1.603e-06	sig	0
Single_Model	TAG58:7-FA16:0	-1.33634	0.527725	-2.53226	0.011333		Anova	model.00	4	40.544	46.649	-16.272	32.544	model.01	5	31.352	38.984	-10.676	21.352	11.191	1	0.0008218	sig	0
Single_Model	TAG58:7-FA18:0	-2.12576	0.875159	-2.42899	0.0151408		Anova	model.00	4	40.544	46.649	-16.2718	32.544	model.01	5	20.815	28.447	-5.4075	10.815	21.729	1	3.141e-06	sig	0
Single_Model	TAG58:7-FA18:1	-1.32651	0.534815	-2.4803	0.013127		Anova	model.00	4	40.544	46.649	-16.2718	32.544	model.01	5	20.25	27.882	-5.1251	10.25	22.294	1	2.34e-06	sig	0
Single_Model	TAG58:7-FA18:2	-1.3409	0.547531	-2.449	0.0143254		Anova	model.00	4	40.544	46.649	-16.2718	32.544	model.01	5	20.641	28.273	-5.3206	10.641	21.902	1	2.869e-06	sig	0
Single_Model	TAG58:7-FA20:4	-1.57595	0.533761	-2.95254	0.00315176		Anova	model.00	4	40.544	46.649	-16.2718	32.544	model.01	5	24.507	32.139	-7.2536	14.507	18.036	1	2.167e-05	sig	0
Single_Model	TAG58:7-FA22:4	-1.37392	0.566089	-2.42704	0.0152226		Anova	model.00	4	40.544	46.649	-16.2718	32.544	model.01	5	21.92	29.551	-5.9598	11.92	20.624	1	5.589e-06	sig	0
Single_Model	TAG58:7-FA22:5	-1.35414	0.575268	-2.35392	0.0185765		Anova	model.00	4	40.544	46.649	-16.2718	32.544	model.01	5	21.05	28.682	-5.5251	11.05	21.494	1	3.55e-06	sig	0
Single_Model	TAG58:7-FA22:6	-1.73086	0.742156	-2.3322	0.01969		Anova	model.00	4	40.544	46.649	-16.2718	32.544	model.01	5	19.353	26.985	-4.6767	9.353	23.19	1	1.467e-06	sig	0
Single_Model	TAG58:8-FA18:1	-1.62771	0.652533	-2.49445	0.0126152		Anova	model.00	4	40.544	46.649	-16.2718	32.544	model.01	5	20.687	28.319	-5.3434	10.687	21.857	1	2.938e-06	sig	0
Single_Model	TAG58:8-FA18:2	-1.50741	0.606876	-2.48389	0.0129957		Anova	model.00	4	40.544	46.649	-16.2718	32.544	model.01	5	20.854	28.486	-5.4271	10.854	21.689	1	3.205e-06	sig	0
Single_Model	TAG58:8-FA20:3	-1.19493	0.449953	-2.65568	0.0079149		Anova	model.00	4	40.544	46.649	-16.2718	32.544	model.01	5	28.035	35.666	-9.0173	18.035	14.509	1	0.0001395	sig	0
Single_Model	TAG58:8-FA20:4	-1.60445	0.540833	-2.96662	0.00301092		Anova	model.00	4	40.544	46.649	-16.2718	32.544	model.01	5	27.017	34.648	-8.5083	17.017	15.527	1	8.133e-05	sig	0
Single_Model	TAG58:8-FA22:5	-1.41638	0.613142	-2.31004	0.0208859		Anova	model.00	4	40.544	46.649	-16.2718	32.544	model.01	5	21.052	28.683	-5.5258	11.052	21.492	1	3.553e-06	sig	0
Single_Model	TAG58:8-FA22:6	-1.70906	0.765333	-2.23309	0.0255431		Anova	model.00	4	40.544	46.649	-16.2718	32.544	model.01	5	20.833	28.465	-5.4165	10.833	21.711	1	3.17e-06	sig	0
Single_Model	TAG58:9-FA18:1	-1.90041	0.711331	-2.67163	0.00754835		Anova	model.00	4	40.544	46.649	-16.2718	32.544	model.01	5	21.37	29.002	-5.6849	11.37	21.174	1	4.194e-06	sig	0
Single_Model	TAG58:9-FA18:2	-1.86016	0.787121	-2.36325	0.0181154		Anova	model.00	4	40.544	46.649	-16.2718	32.544	model.01	5	22.57	30.202	-6.2849	12.57	19.974	1	7.851e-06	sig	0
Single_Model	TAG58:9-FA20:4	-1.45334	0.492622	-2.95022	0.00317547		Anova	model.00	4	40.544	46.649	-16.2718	32.544	model.01	5	25.921	33.553	-7.9606	15.921	16.622	1	4.561e-05	sig	0
Single_Model	TAG58:9-FA22:5	-1.35692	0.569305	-2.38347	0.0171503		Anova	model.00	4	40.544	46.649	-16.2718	32.544	model.01	5	21.656	29.287	-5.8278	11.656	20.888	1	4.869e-06	sig	0
Single_Model	TAG58:9-FA22:6	-1.73171	0.80725	-2.14519	0.0319376		Anova	model.00	4	40.544	46.649	-16.2718	32.544	model.01	5	21.495	29.127	-5.7476	11.495	21.049	1	4.478e-06	sig	0

## Sheet: List_MD
Glmer_status	lipidSpecies	Estimate	Std.Error	zvalue	Pr(>|z|)		Glmer_Anova	Anova_model00	npar	AIC	BIC	logLik	deviance	Anova_model.01	npar	AIC	BIC	logLik	deviance	Chisq	Df	Pr(>Chisq)	Significant status considered	HMDB
Single_Model	CE(20:0)	1.40284	0.430069	3.2619	0.00110667		Anova	model.00	4	85.494	94.252	-38.747	77.494	model.01	5	70.1	81.048	-30.05	60.1	17.394	1	3.038e-05	sig	HMDB06740
Single_Model	CE(20:1)	1.90806	0.550853	3.46383	0.000532549		Anova	model.00	4	85.494	94.252	-38.747	77.494	model.01	5	64.926	75.875	-27.463	54.926	22.567	1	2.029e-06	sig	HMDB05193
Single_Model	CE(20:3)	0.604642	0.321688	1.87959	0.060164		Anova	model.00	4	85.494	94.252	-38.747	77.494	model.01	5	83.611	94.56	-36.806	73.611	3.8825	1	0.04879	nsig	HMDB06736
Single_Model	CE(20:4)	-0.58643	0.398771	-1.47059	0.141401		Anova	model.00	4	85.494	94.252	-38.747	77.494	model.01	5	85.322	96.27	-37.661	75.322	2.1721	1	0.1405	nsig	HMDB06726
Single_Model	CE(20:5)	0.151957	0.357765	0.424741	0.671026		Anova	model.00	4	85.494	94.252	-38.747	77.494	model.01	5	87.308	98.256	-38.654	77.308	0.1856	1	0.6666	nsig	HMDB06731
Single_Model	CE(22:1)	1.71809	0.510554	3.36515	0.000765021		Anova	model.00	4	85.494	94.252	-38.747	77.494	model.01	5	66.821	77.769	-28.41	56.821	20.673	1	5.447e-06	sig	HMDB10372
Single_Model	CE(22:2)	0.676173	0.313669	2.15569	0.0311077		Anova	model.00	4	85.494	94.252	-38.747	77.494	model.01	5	82.361	93.31	-36.181	72.361	5.1326	1	0.02348	sig	HMDB06737
Single_Model	CE(24:0)	1.12111	0.400292	2.80074	0.0050986		Anova	model.00	4	85.494	94.252	-38.747	77.494	model.01	5	77.184	88.132	-33.592	67.184	10.31	1	0.001323	sig	HMDB10376
Single_Model	CER(20:0)	-4.48025	1.18239	-3.78915	0.000151164		Anova	model.00	4	85.494	94.252	-38.747	77.494	model.01	5	50.007	60.955	-20.003	40.007	37.487	1	9.2e-10	sig	HMDB04951
Single_Model	CER(22:0)	-0.223571	0.595651	-0.375338	0.707409		Anova	model.00	4	85.494	94.252	-38.747	77.494	model.01	5	87.355	98.303	-38.677	77.355	0.1389	1	0.7093	nsig	HMDB04952
Single_Model	DAG(14:0/16:0)	-2.78424	0.821289	-3.39009	0.000698704		Anova	model.00	4	85.494	94.252	-38.747	77.494	model.01	5	44.721	55.669	-17.36	34.721	42.773	1	6.15e-11	sig	HMDB07095
Single_Model	DAG(14:0/18:1)	-2.17688	0.648913	-3.35465	0.000794645		Anova	model.00	4	85.494	94.252	-38.747	77.494	model.01	5	46.889	57.837	-18.444	36.889	40.605	1	1.86e-10	sig	HMDB07015
Single_Model	DAG(14:0/18:2)	-1.48571	0.396013	-3.75166	0.000175666		Anova	model.00	4	85.494	94.252	-38.747	77.494	model.01	5	58.364	69.312	-24.182	48.364	29.13	1	6.77e-08	sig	HMDB07016
Single_Model	DAG(16:0/16:0)	-1.92346	0.554592	-3.46824	0.000523874		Anova	model.00	4	85.494	94.252	-38.747	77.494	model.01	5	68.249	79.197	-29.124	58.249	19.245	1	1.15e-05	sig	HMDB07098
Single_Model	DAG(16:0/16:1)	-2.04289	0.626773	-3.25937	0.00111659		Anova	model.00	4	85.494	94.252	-38.747	77.494	model.01	5	51.481	62.429	-20.74	41.481	36.013	1	1.96e-09	sig	HMDB07099
Single_Model	DAG(16:0/18:0)	-1.67153	0.567338	-2.94627	0.00321627		Anova	model.00	4	85.494	94.252	-38.747	77.494	model.01	5	76.144	87.092	-33.072	66.144	11.35	1	0.0007544	sig	HMDB07100
Single_Model	DAG(16:0/18:1)	-2.9515	0.870169	-3.39187	0.000694164		Anova	model.00	4	85.494	94.252	-38.747	77.494	model.01	5	49.513	60.461	-19.756	39.513	37.981	1	7.14e-10	sig	HMDB07102
Single_Model	DAG(16:0/18:2)	-2.16526	0.824285	-2.62683	0.00861837		Anova	model.00	4	85.494	94.252	-38.747	77.494	model.01	5	66.706	77.654	-28.353	56.706	20.788	1	5.131e-06	sig	HMDB07103
Single_Model	DAG(16:0/18:3)	-2.42889	0.727428	-3.33901	0.000840778		Anova	model.00	4	85.494	94.252	-38.747	77.494	model.01	5	57.464	68.412	-23.732	47.464	30.03	1	4.25e-08	sig	HMDB07105
Single_Model	DAG(16:0/22:5)	-1.83033	0.545365	-3.35616	0.000790328		Anova	model.00	4	85.494	94.252	-38.747	77.494	model.01	5	69.827	80.775	-29.913	59.827	17.667	1	2.632e-05	sig	HMDB07120
Single_Model	DAG(16:1/18:1)	-1.58793	0.445753	-3.56235	0.000367544		Anova	model.00	4	85.494	94.252	-38.747	77.494	model.01	5	51.191	62.139	-20.595	41.191	36.303	1	1.69e-09	sig	HMDB07131
Single_Model	DAG(16:1/18:2)	-1.78602	0.538623	-3.31589	0.000913507		Anova	model.00	4	85.494	94.252	-38.747	77.494	model.01	5	54.477	65.426	-22.239	44.477	33.016	1	9.14e-09	sig	HMDB07132
Single_Model	DAG(18:0/18:1)	-3.60133	1.0017	-3.5952	0.000324137		Anova	model.00	4	85.494	94.252	-38.747	77.494	model.01	5	51.324	62.272	-20.662	41.324	36.17	1	1.81e-09	sig	HMDB07160
Single_Model	DAG(18:1/18:1)	-2.26006	0.656204	-3.44415	0.000572859		Anova	model.00	4	85.494	94.252	-38.747	77.494	model.01	5	50.541	61.489	-20.271	40.541	36.953	1	1.21e-09	sig	HMDB07218
Single_Model	DAG(18:1/18:2)	-1.76948	0.53288	-3.32061	0.000898212		Anova	model.00	4	85.494	94.252	-38.747	77.494	model.01	5	61.96	72.908	-25.98	51.96	25.534	1	4.35e-07	sig	HMDB07219
Single_Model	DAG(18:2/20:4)	-1.58082	0.445677	-3.54701	0.000389631		Anova	model.00	4	85.494	94.252	-38.747	77.494	model.01	5	69.201	80.149	-29.6	59.201	18.293	1	1.894e-05	sig	HMDB07257
Single_Model	DAG(20:0/20:0)	-0.0950528	0.347207	-0.273764	0.784266		Anova	model.00	4	85.494	94.252	-38.747	77.494	model.01	5	87.419	98.367	-38.709	77.419	0.0753	1	0.7838	nsig	HMDB07368
Single_Model	FFA(14:0)	-0.0837727	0.403666	-0.20753	0.835596		Anova	model.00	4	85.494	94.252	-38.747	77.494	model.01	5	87.45	98.399	-38.725	77.45	0.0433	1	0.8351	nsig	HMDB00806
Single_Model	FFA(15:0)	0.0418382	0.407358	0.102706	0.918196		Anova	model.00	4	85.494	94.252	-38.747	77.494	model.01	5	87.483	98.432	-38.742	77.483	0.0105	1	0.9183	nsig	HMDB00826
Single_Model	FFA(16:0)	-0.137057	0.386843	-0.354297	0.723116		Anova	model.00	4	85.494	94.252	-38.747	77.494	model.01	5	87.367	98.316	-38.684	77.367	0.1264	1	0.7222	nsig	HMDB00220
Single_Model	FFA(16:1)	0.0216678	0.391298	0.0553741	0.95584		Anova	model.00	4	85.494	94.252	-38.747	77.494	model.01	5	87.491	98.439	-38.745	77.491	0.0031	1	0.9559	nsig	HMDB03229
Single_Model	FFA(17:0)	0.0176253	0.401586	0.0438893	0.964993		Anova	model.00	4	85.494	94.252	-38.747	77.494	model.01	5	87.492	98.44	-38.746	77.492	0.0019	1	0.965	nsig	HMDB02259
Single_Model	FFA(18:0)	-0.0623422	0.338789	-0.184015	0.854002		Anova	model.00	4	85.494	94.252	-38.747	77.494	model.01	5	87.46	98.408	-38.73	77.46	0.034	1	0.8538	nsig	HMDB00827
Single_Model	FFA(18:1)	-0.139215	0.375461	-0.370783	0.710799		Anova	model.00	4	85.494	94.252	-38.747	77.494	model.01	5	87.355	98.303	-38.678	77.355	0.1387	1	0.7096	nsig	HMDB00207
Single_Model	FFA(18:2)	0.151364	0.441556	0.342796	0.731752		Anova	model.00	4	85.494	94.252	-38.747	77.494	model.01	5	87.376	98.324	-38.688	77.376	0.1178	1	0.7315	nsig	HMDB00673
Single_Model	FFA(18:3)	-0.237514	0.444144	-0.534768	0.59281		Anova	model.00	4	85.494	94.252	-38.747	77.494	model.01	5	87.204	98.152	-38.602	77.204	0.2897	1	0.5904	nsig	HMDB01388
Single_Model	FFA(18:4)	0.0394232	0.307543	0.128187	0.898001		Anova	model.00	4	85.494	94.252	-38.747	77.494	model.01	5	87.477	98.426	-38.739	77.477	0.0164	1	0.8981	nsig	HMDB06547
Single_Model	FFA(20:0)	0.0252366	0.302334	0.0834726	0.933476		Anova	model.00	4	85.494	94.252	-38.747	77.494	model.01	5	87.487	98.435	-38.743	77.487	0.007	1	0.9335	nsig	HMDB02212
Single_Model	FFA(22:0)	-0.15409	0.360854	-0.427014	0.669369		Anova	model.00	4	85.494	94.252	-38.747	77.494	model.01	5	87.31	98.258	-38.655	77.31	0.1837	1	0.6682	nsig	HMDB00944
Single_Model	FFA(22:4)	0.482889	0.53096	0.909464	0.363105		Anova	model.00	4	85.494	94.252	-38.747	77.494	model.01	5	86.597	97.545	-38.298	76.597	0.8969	1	0.3436	nsig	HMDB02226
Single_Model	HCER(18:0)	-2.08623	0.525163	-3.97253	7.11e-05		Anova	model.00	4	85.494	94.252	-38.747	77.494	model.01	5	69.585	80.533	-29.792	59.585	17.909	1	2.317e-05	sig	HMDB04972
Single_Model	HCER(20:0)	-2.89492	0.693556	-4.17403	2.99e-05		Anova	model.00	4	85.494	94.252	-38.747	77.494	model.01	5	58.977	69.925	-24.489	48.977	28.517	1	9.29e-08	sig	HMDB04973
Single_Model	LCER(24:1)	0.379253	0.31495	1.20417	0.228525		Anova	model.00	4	85.494	94.252	-38.747	77.494	model.01	5	86.021	96.969	-38.01	76.021	1.4731	1	0.2249	nsig	HMDB04872
Single_Model	LPC(15:0)	1.96895	0.586363	3.3579	0.000785366		Anova	model.00	4	85.494	94.252	-38.747	77.494	model.01	5	69.425	80.373	-29.712	59.425	18.069	1	2.13e-05	sig	HMDB10381
Single_Model	LPC(16:0)	1.46729	0.618998	2.37043	0.0177673		Anova	model.00	4	85.494	94.252	-38.747	77.494	model.01	5	80.934	91.882	-35.467	70.934	6.5597	1	0.01043	sig	HMDB10382
Single_Model	LPC(16:1)	5.39507	1.54589	3.48994	0.000483133		Anova	model.00	4	85.494	94.252	-38.747	77.494	model.01	5	51.285	62.234	-20.643	41.285	36.209	1	1.77e-09	sig	HMDB10383
Single_Model	LPC(17:0)	1.28235	0.509556	2.51661	0.011849		Anova	model.00	4	85.494	94.252	-38.747	77.494	model.01	5	79.778	90.726	-34.889	69.778	7.7161	1	0.005473	sig
Single_Model	LPC(18:0)	0.163336	0.556551	0.293478	0.769157		Anova	model.00	4	85.494	94.252	-38.747	77.494	model.01	5	87.408	98.356	-38.704	77.408	0.0862	1	0.7691	nsig	HMDB10384
Single_Model	LPC(18:1)	3.36538	1.00312	3.35493	0.000793855		Anova	model.00	4	85.494	94.252	-38.747	77.494	model.01	5	69.126	80.075	-29.563	59.126	18.367	1	1.822e-05	sig
Single_Model	LPC(18:2)	4.40649	1.29365	3.40623	0.000658659		Anova	model.00	4	85.494	94.252	-38.747	77.494	model.01	5	60.321	71.27	-25.161	50.321	27.172	1	1.86e-07	sig
Single_Model	LPC(20:3)	1.62692	0.641899	2.53454	0.0112595		Anova	model.00	4	85.494	94.252	-38.747	77.494	model.01	5	79.446	90.395	-34.723	69.446	8.0474	1	0.004557	sig	HMDB10394
Single_Model	LPC(20:4)	0.537221	0.723066	0.742976	0.457496		Anova	model.00	4	85.494	94.252	-38.747	77.494	model.01	5	86.922	97.871	-38.461	76.922	0.5715	1	0.4497	nsig	HMDB10395
Single_Model	LPE(16:0)	0.803274	0.489095	1.64237	0.100514		Anova	model.00	4	85.494	94.252	-38.747	77.494	model.01	5	84.642	95.59	-37.321	74.642	2.8519	1	0.09127	nsig	HMDB11503
Single_Model	LPE(18:0)	0.787165	0.522195	1.50742	0.131704		Anova	model.00	4	85.494	94.252	-38.747	77.494	model.01	5	85.131	96.08	-37.566	75.131	2.3624	1	0.1243	nsig	HMDB11130
Single_Model	LPE(18:1)	3.21444	0.878218	3.66018	0.000252039		Anova	model.00	4	85.494	94.252	-38.747	77.494	model.01	5	66.712	77.66	-28.356	56.712	20.782	1	5.146e-06	sig	HMDB11476
Single_Model	LPE(18:2)	2.2085	0.743205	2.97159	0.00296267		Anova	model.00	4	85.494	94.252	-38.747	77.494	model.01	5	76.191	87.139	-33.095	66.191	11.303	1	0.0007739	sig	HMDB11477
Single_Model	LPE(20:3)	2.26231	0.65516	3.45307	0.000554253		Anova	model.00	4	85.494	94.252	-38.747	77.494	model.01	5	69.262	80.21	-29.631	59.262	18.232	1	1.956e-05	sig	HMDB11486
Single_Model	LPE(20:4)	2.03303	0.782474	2.59821	0.00937106		Anova	model.00	4	85.494	94.252	-38.747	77.494	model.01	5	78.035	88.983	-34.017	68.035	9.4591	1	0.002101	sig	HMDB11487
Single_Model	PC(16:0/14:0)	1.76028	0.556639	3.16233	0.00156511		Anova	model.00	4	85.494	94.252	-38.747	77.494	model.01	5	72.419	83.367	-31.21	62.419	15.075	1	0.0001033	sig	HMDB07965
Single_Model	PC(16:0/16:0)	1.10419	0.793657	1.39127	0.164145		Anova	model.00	4	85.494	94.252	-38.747	77.494	model.01	5	85.404	96.352	-37.702	75.404	2.09	1	0.1483	nsig	HMDB00564
Single_Model	PC(16:0/16:1)	1.88884	0.606914	3.1122	0.00185699		Anova	model.00	4	85.494	94.252	-38.747	77.494	model.01	5	71.943	82.891	-30.972	61.943	15.551	1	8.032e-05	sig	HMDB07969
Single_Model	PC(16:0/18:1)	2.31872	0.883767	2.62368	0.00869866		Anova	model.00	4	85.494	94.252	-38.747	77.494	model.01	5	77.697	88.645	-33.848	67.697	9.797	1	0.001748	sig	HMDB07972
Single_Model	PC(16:0/18:3)	0.640365	0.519399	1.2329	0.217614		Anova	model.00	4	85.494	94.252	-38.747	77.494	model.01	5	85.599	96.547	-37.799	75.599	1.8953	1	0.1686	nsig	HMDB07975
Single_Model	PC(16:0/20:1)	0.576418	0.443709	1.29909	0.193913		Anova	model.00	4	85.494	94.252	-38.747	77.494	model.01	5	85.704	96.653	-37.852	75.704	1.7894	1	0.181	nsig	HMDB07978
Single_Model	PC(16:0/20:2)	0.98886	0.606599	1.63017	0.103066		Anova	model.00	4	85.494	94.252	-38.747	77.494	model.01	5	84.522	95.47	-37.261	74.522	2.9716	1	0.08474	nsig	HMDB07979
Single_Model	PC(16:0/20:3)	0.503693	0.544369	0.925279	0.354821		Anova	model.00	4	85.494	94.252	-38.747	77.494	model.01	5	86.599	97.547	-38.299	76.599	0.8951	1	0.3441	nsig	HMDB07981
Single_Model	PC(16:0/20:4)	-1.97805	0.541963	-3.64979	0.000262453		Anova	model.00	4	85.494	94.252	-38.747	77.494	model.01	5	75.648	86.597	-32.824	65.648	11.846	1	0.000578	sig	HMDB07982
Single_Model	PC(16:0/20:5)	-0.103464	0.300769	-0.343997	0.730848		Anova	model.00	4	85.494	94.252	-38.747	77.494	model.01	5	87.375	98.323	-38.687	77.375	0.1189	1	0.7302	nsig	HMDB07984
Single_Model	PC(16:0/22:4)	-0.822296	0.487268	-1.68756	0.0914953		Anova	model.00	4	85.494	94.252	-38.747	77.494	model.01	5	83.942	94.89	-36.971	73.942	3.5522	1	0.05947	nsig	HMDB07988
Single_Model	PC(16:0/22:5)	-0.287232	0.432622	-0.663934	0.506733		Anova	model.00	4	85.494	94.252	-38.747	77.494	model.01	5	87.034	97.982	-38.517	77.034	0.4597	1	0.4978	nsig	HMDB07990
Single_Model	PC(16:0/22:6)	1.54256	0.694748	2.22032	0.0263969		Anova	model.00	4	85.494	94.252	-38.747	77.494	model.01	5	80.745	91.693	-35.372	70.745	6.749	1	0.00938	sig	HMDB07991
Single_Model	PC(17:0/18:1)	2.00007	0.723205	2.76556	0.00568251		Anova	model.00	4	85.494	94.252	-38.747	77.494	model.01	5	74.772	85.721	-32.386	64.772	12.722	1	0.0003615	sig
Single_Model	PC(17:0/18:2)	1.62169	0.646724	2.50754	0.0121574		Anova	model.00	4	85.494	94.252	-38.747	77.494	model.01	5	78.401	89.349	-34.2	68.401	9.0929	1	0.002566	sig
Single_Model	PC(17:0/20:4)	-0.105805	0.239873	-0.441088	0.659149		Anova	model.00	4	85.494	94.252	-38.747	77.494	model.01	5	87.3	98.248	-38.65	77.3	0.1942	1	0.6594	nsig
Single_Model	PC(18:0/16:1)	1.93417	0.696569	2.77671	0.00549123		Anova	model.00	4	85.494	94.252	-38.747	77.494	model.01	5	75.683	86.632	-32.842	65.683	11.81	1	0.000589	sig	HMDB08035
Single_Model	PC(18:0/18:0)	1.20648	0.809925	1.48962	0.136323		Anova	model.00	4	85.494	94.252	-38.747	77.494	model.01	5	84.93	95.878	-37.465	74.93	2.564	1	0.1093	nsig	HMDB08036
Single_Model	PC(18:0/18:1)	0.15535	0.592959	0.26199	0.793329		Anova	model.00	4	85.494	94.252	-38.747	77.494	model.01	5	87.424	98.373	-38.712	77.424	0.0695	1	0.7921	nsig	HMDB08038
Single_Model	PC(18:0/18:2)	0.691806	0.674504	1.02565	0.305056		Anova	model.00	4	85.494	94.252	-38.747	77.494	model.01	5	86.385	97.333	-38.193	76.385	1.1088	1	0.2923	nsig	HMDB08039
Single_Model	PC(18:0/18:3)	-0.34848	0.396004	-0.879993	0.378863		Anova	model.00	4	85.494	94.252	-38.747	77.494	model.01	5	86.7	97.648	-38.35	76.7	0.794	1	0.3729	nsig	HMDB08040
Single_Model	PC(18:0/20:2)	0.0701174	0.378961	0.185025	0.853209		Anova	model.00	4	85.494	94.252	-38.747	77.494	model.01	5	87.46	98.408	-38.73	77.46	0.0342	1	0.8533	nsig	HMDB08045
Single_Model	PC(18:0/20:3)	-0.448574	0.541572	-0.828281	0.407511		Anova	model.00	4	85.494	94.252	-38.747	77.494	model.01	5	86.813	97.761	-38.407	76.813	0.6806	1	0.4094	nsig	HMDB08047
Single_Model	PC(18:0/20:4)	-2.56096	0.638642	-4.01001	6.07e-05		Anova	model.00	4	85.494	94.252	-38.747	77.494	model.01	5	63.395	74.343	-26.697	53.395	24.099	1	9.15e-07	sig	HMDB08048
Single_Model	PC(18:0/22:4)	-0.611823	0.358413	-1.70703	0.0878156		Anova	model.00	4	85.494	94.252	-38.747	77.494	model.01	5	84.267	95.216	-37.134	74.267	3.2266	1	0.07245	nsig	HMDB08054
Single_Model	PC(18:0/22:5)	0.0382522	0.292585	0.130739	0.895982		Anova	model.00	4	85.494	94.252	-38.747	77.494	model.01	5	87.477	98.425	-38.738	77.477	0.0171	1	0.8959	nsig	HMDB08056
Single_Model	PC(18:1/16:1)	1.92089	0.667704	2.87685	0.00401661		Anova	model.00	4	85.494	94.252	-38.747	77.494	model.01	5	75.075	86.024	-32.538	65.075	12.418	1	0.0004251	sig	HMDB08101
Single_Model	PC(18:1/18:1)	0.419708	0.595364	0.70496	0.480835		Anova	model.00	4	85.494	94.252	-38.747	77.494	model.01	5	86.986	97.935	-38.493	76.986	0.5075	1	0.4762	nsig	HMDB00593
Single_Model	PC(18:1/18:2)	0.579139	0.628665	0.92122	0.356935		Anova	model.00	4	85.494	94.252	-38.747	77.494	model.01	5	86.616	97.564	-38.308	76.616	0.8781	1	0.3487	nsig	HMDB08105
Single_Model	PC(18:1/18:3)	-0.191618	0.383178	-0.500074	0.617023		Anova	model.00	4	85.494	94.252	-38.747	77.494	model.01	5	87.242	98.19	-38.621	77.242	0.2522	1	0.6155	nsig	HMDB08107
Single_Model	PC(18:1/20:2)	0.627843	0.455579	1.37812	0.168166		Anova	model.00	4	85.494	94.252	-38.747	77.494	model.01	5	85.432	96.38	-37.716	75.432	2.0617	1	0.151	nsig	HMDB08111
Single_Model	PC(18:1/20:3)	0.618041	0.541065	1.14227	0.253343		Anova	model.00	4	85.494	94.252	-38.747	77.494	model.01	5	86.111	97.059	-38.055	76.111	1.3833	1	0.2395	nsig	HMDB08113
Single_Model	PC(18:1/20:4)	-1.76173	0.504422	-3.49257	0.0004784		Anova	model.00	4	85.494	94.252	-38.747	77.494	model.01	5	77.763	88.711	-33.882	67.763	9.7308	1	0.001812	sig	HMDB08114
Single_Model	PC(18:1/22:6)	0.504671	0.268223	1.88153	0.0598993		Anova	model.00	4	85.494	94.252	-38.747	77.494	model.01	5	83.394	94.342	-36.697	73.394	4.1002	1	0.04288	nsig	HMDB08123
Single_Model	PC(18:2/16:1)	3.55432	1.08014	3.29059	0.000999766		Anova	model.00	4	85.494	94.252	-38.747	77.494	model.01	5	65.343	76.291	-27.672	55.343	22.151	1	2.521e-06	sig	HMDB08134
Single_Model	PC(18:2/20:1)	0.29959	0.467576	0.64073	0.521698		Anova	model.00	4	85.494	94.252	-38.747	77.494	model.01	5	87.084	98.032	-38.542	77.084	0.4099	1	0.522	nsig	HMDB08144
Single_Model	PC(18:2/20:2)	1.13843	0.554939	2.05145	0.0402232		Anova	model.00	4	85.494	94.252	-38.747	77.494	model.01	5	82.608	93.556	-36.304	72.608	4.8856	1	0.02708	sig	HMDB08145
Single_Model	PC(18:2/20:3)	1.15132	0.496002	2.32119	0.0202765		Anova	model.00	4	85.494	94.252	-38.747	77.494	model.01	5	80.087	91.035	-35.044	70.087	7.4068	1	0.006498	sig	HMDB08146
Single_Model	PC(18:2/20:4)	0.354336	0.604822	0.585851	0.557975		Anova	model.00	4	85.494	94.252	-38.747	77.494	model.01	5	87.144	98.092	-38.572	77.144	0.3501	1	0.554	nsig	HMDB08147
Single_Model	PC(20:0/18:1)	1.74282	0.73298	2.37772	0.01742		Anova	model.00	4	85.494	94.252	-38.747	77.494	model.01	5	79.404	90.352	-34.702	69.404	8.0901	1	0.004451	sig	HMDB08269
Single_Model	PC(20:0/18:2)	1.003	0.526297	1.90577	0.0566795		Anova	model.00	4	85.494	94.252	-38.747	77.494	model.01	5	83.454	94.402	-36.727	73.454	4.0401	1	0.04443	nsig	HMDB08270
Single_Model	PE(16:0/18:1)	1.06509	0.601314	1.77127	0.0765153		Anova	model.00	4	85.494	94.252	-38.747	77.494	model.01	5	84.076	95.024	-37.038	74.076	3.4178	1	0.0645	nsig	HMDB08927
Single_Model	PE(16:0/20:4)	-0.471467	0.478758	-0.984772	0.324736		Anova	model.00	4	85.494	94.252	-38.747	77.494	model.01	5	86.512	97.46	-38.256	76.512	0.9817	1	0.3218	nsig	HMDB08937
Single_Model	PE(16:0/22:6)	0.0243436	0.389419	0.0625127	0.950155		Anova	model.00	4	85.494	94.252	-38.747	77.494	model.01	5	87.49	98.438	-38.745	77.49	0.0039	1	0.9501	nsig	HMDB08946
Single_Model	PE(18:0/18:0)	0.998468	0.507081	1.96905	0.0489475		Anova	model.00	4	85.494	94.252	-38.747	77.494	model.01	5	82.939	93.887	-36.47	72.939	4.5547	1	0.03283	sig	HMDB08991
Single_Model	PE(18:0/20:3)	0.305495	0.457417	0.667871	0.504216		Anova	model.00	4	85.494	94.252	-38.747	77.494	model.01	5	87.037	97.985	-38.518	77.037	0.4573	1	0.4989	nsig	HMDB11382
Single_Model	PE(18:0/20:4)	-0.757249	0.452274	-1.67431	0.0940691		Anova	model.00	4	85.494	94.252	-38.747	77.494	model.01	5	84.624	95.573	-37.312	74.624	2.8694	1	0.09028	nsig	HMDB09003
Single_Model	PE(18:0/22:4)	-1.71879	0.6006	-2.8618	0.00421247		Anova	model.00	4	85.494	94.252	-38.747	77.494	model.01	5	76.79	87.738	-33.395	66.79	10.704	1	0.001069	sig	HMDB09009
Single_Model	PE(18:0/22:6)	0.0462637	0.396604	0.11665	0.907138		Anova	model.00	4	85.494	94.252	-38.747	77.494	model.01	5	87.48	98.428	-38.74	77.48	0.0136	1	0.9071	nsig	HMDB09012
Single_Model	PE(18:1/18:1)	1.37717	0.586443	2.34835	0.0188569		Anova	model.00	4	85.494	94.252	-38.747	77.494	model.01	5	80.829	91.777	-35.415	70.829	6.6647	1	0.009834	sig	HMDB09059
Single_Model	PE(18:1/20:4)	0.506447	0.48495	1.04433	0.296334		Anova	model.00	4	85.494	94.252	-38.747	77.494	model.01	5	86.329	97.278	-38.165	76.329	1.1646	1	0.2805	nsig	HMDB09069
Single_Model	PE(O-16:0/18:1)	0.260683	0.561401	0.464343	0.642402		Anova	model.00	4	85.494	94.252	-38.747	77.494	model.01	5	87.277	98.225	-38.638	77.277	0.2173	1	0.6411	nsig	HMDB11157
Single_Model	PE(O-16:0/20:4)	-0.699819	0.485799	-1.44055	0.149711		Anova	model.00	4	85.494	94.252	-38.747	77.494	model.01	5	85.311	96.259	-37.655	75.311	2.1831	1	0.1395	nsig
Single_Model	PE(O-18:0/18:1)	-0.658887	0.452312	-1.45671	0.145196		Anova	model.00	4	85.494	94.252	-38.747	77.494	model.01	5	85.308	96.256	-37.654	75.308	2.1856	1	0.1393	nsig
Single_Model	PE(O-18:0/18:2)	-1.52463	0.518628	-2.93974	0.00328487		Anova	model.00	4	85.494	94.252	-38.747	77.494	model.01	5	76.584	87.533	-33.292	66.584	10.909	1	0.0009567	sig
Single_Model	PE(O-18:0/20:4)	-1.56323	0.418052	-3.73932	0.000184521		Anova	model.00	4	85.494	94.252	-38.747	77.494	model.01	5	73.939	84.887	-31.969	63.939	13.555	1	0.0002317	sig
Single_Model	PE(P-16:0/18:1)	1.3209	0.531655	2.4845	0.0129732		Anova	model.00	4	85.494	94.252	-38.747	77.494	model.01	5	80.097	91.045	-35.048	70.097	7.3973	1	0.006532	sig	HMDB11342
Single_Model	PE(P-16:0/18:2)	0.452719	0.447331	1.01205	0.311516		Anova	model.00	4	85.494	94.252	-38.747	77.494	model.01	5	86.458	97.407	-38.229	76.458	1.0354	1	0.3089	nsig	HMDB11343
Single_Model	PE(P-16:0/20:3)	1.07471	0.451757	2.37895	0.0173619		Anova	model.00	4	85.494	94.252	-38.747	77.494	model.01	5	80.358	91.306	-35.179	70.358	7.1362	1	0.007554	sig	HMDB11351
Single_Model	PE(P-16:0/20:4)	0.12485	0.442077	0.282418	0.777623		Anova	model.00	4	85.494	94.252	-38.747	77.494	model.01	5	87.414	98.362	-38.707	77.414	0.08	1	0.7773	nsig	HMDB11353
Single_Model	PE(P-16:0/22:4)	-1.09314	0.495607	-2.20566	0.0274079		Anova	model.00	4	85.494	94.252	-38.747	77.494	model.01	5	82.047	92.996	-36.024	72.047	5.4466	1	0.01961	sig	HMDB11358
Single_Model	PE(P-16:0/22:6)	0.17382	0.288386	0.602734	0.546685		Anova	model.00	4	85.494	94.252	-38.747	77.494	model.01	5	87.124	98.072	-38.562	77.124	0.37	1	0.543	nsig
Single_Model	PE(P-18:0/16:0)	0.0453882	0.462268	0.098186	0.921785		Anova	model.00	4	85.494	94.252	-38.747	77.494	model.01	5	87.484	98.432	-38.742	77.484	0.0096	1	0.9218	nsig	HMDB11371
Single_Model	PE(P-18:0/18:1)	0.0257473	0.41714	0.0617234	0.950783		Anova	model.00	4	85.494	94.252	-38.747	77.494	model.01	5	87.49	98.438	-38.745	77.49	0.0038	1	0.9508	nsig	HMDB11375
Single_Model	PE(P-18:0/18:2)	-0.590036	0.402217	-1.46696	0.142387		Anova	model.00	4	85.494	94.252	-38.747	77.494	model.01	5	85.211	96.159	-37.605	75.211	2.2829	1	0.1308	nsig	HMDB11376
Single_Model	PE(P-18:0/20:3)	0.739833	0.429915	1.72088	0.0852727		Anova	model.00	4	85.494	94.252	-38.747	77.494	model.01	5	84.202	95.15	-37.101	74.202	3.292	1	0.06962	nsig	HMDB11384
Single_Model	PE(P-18:0/20:4)	-0.230026	0.407694	-0.564212	0.57261		Anova	model.00	4	85.494	94.252	-38.747	77.494	model.01	5	87.176	98.124	-38.588	77.176	0.3182	1	0.5727	nsig	HMDB11386
Single_Model	PE(P-18:0/22:4)	-1.44016	0.516373	-2.78898	0.00528739		Anova	model.00	4	85.494	94.252	-38.747	77.494	model.01	5	77.947	88.895	-33.974	67.947	9.5467	1	0.002003	sig	HMDB11391
Single_Model	PE(P-18:0/22:6)	0.167368	0.287663	0.581818	0.560689		Anova	model.00	4	85.494	94.252	-38.747	77.494	model.01	5	87.148	98.096	-38.574	77.148	0.3457	1	0.5566	nsig	HMDB11394
Single_Model	PE(P-18:1/18:1)	-0.605533	0.448023	-1.35157	0.176514		Anova	model.00	4	85.494	94.252	-38.747	77.494	model.01	5	85.608	96.556	-37.804	75.608	1.886	1	0.1697	nsig	HMDB11441
Single_Model	PE(P-18:1/18:2)	-0.0245339	0.405688	-0.0604747	0.951778		Anova	model.00	4	85.494	94.252	-38.747	77.494	model.01	5	87.49	98.438	-38.745	77.49	0.0037	1	0.9518	nsig	HMDB11442
Single_Model	PE(P-18:1/20:3)	-0.0850869	0.397771	-0.21391	0.830618		Anova	model.00	4	85.494	94.252	-38.747	77.494	model.01	5	87.448	98.396	-38.724	77.448	0.0458	1	0.8306	nsig	HMDB11450
Single_Model	PE(P-18:1/20:4)	-1.46759	0.420373	-3.49117	0.000480912		Anova	model.00	4	85.494	94.252	-38.747	77.494	model.01	5	77.425	88.373	-33.712	67.425	10.069	1	0.001508	sig	HMDB11451
Single_Model	SM(18:0)	-4.50422	1.60479	-2.80674	0.00500452		Anova	model.00	4	85.494	94.252	-38.747	77.494	model.01	5	30.177	41.125	-10.088	20.177	57.317	1	3.71e-14	sig	HMDB01348
Single_Model	SM(18:1)	-4.01742	1.25994	-3.18858	0.00142973		Anova	model.00	4	85.494	94.252	-38.747	77.494	model.01	5	38.981	49.929	-14.49	28.981	48.513	1	3.28e-12	sig	HMDB12101
Single_Model	SM(20:1)	-3.88916	0.971302	-4.00406	6.23e-05		Anova	model.00	4	85.494	94.252	-38.747	77.494	model.01	5	62.181	73.129	-26.09	52.181	25.313	1	4.87e-07	sig
Single_Model	SM(22:0)	-2.0124	0.725793	-2.7727	0.00555939		Anova	model.00	4	85.494	94.252	-38.747	77.494	model.01	5	78.075	89.024	-34.038	68.075	9.4185	1	0.002148	sig	HMDB12103
Single_Model	SM(22:1)	-1.04972	0.691812	-1.51734	0.12918		Anova	model.00	4	85.494	94.252	-38.747	77.494	model.01	5	85.082	96.03	-37.541	75.082	2.4122	1	0.1204	nsig	HMDB12104
Single_Model	SM(24:0)	-8.84017	2.26198	-3.90816	9.3e-05		Anova	model.00	4	85.494	94.252	-38.747	77.494	model.01	5	43.589	54.537	-16.795	33.589	43.905	1	3.45e-11	sig	HMDB11697
Single_Model	SM(24:1)	-4.10466	0.992613	-4.13521	3.55e-05		Anova	model.00	4	85.494	94.252	-38.747	77.494	model.01	5	48.596	59.544	-19.298	38.596	38.898	1	4.47e-10	sig	HMDB12107
Single_Model	SM(26:0)	2.63999	1.53575	1.71902	0.0856107		Anova	model.00	4	85.494	94.252	-38.747	77.494	model.01	5	84.353	95.302	-37.177	74.353	3.1404	1	0.07637	nsig	HMDB11698
Single_Model	TAG36:0-FA12:0	-1.85047	0.575276	-3.21667	0.00129688		Anova	model.00	4	85.494	94.252	-38.747	77.494	model.01	5	28.21	39.159	-9.105	18.21	59.284	1	1.37e-14	sig
Single_Model	TAG40:0-FA16:0	-1.13855	0.383578	-2.96823	0.00299518		Anova	model.00	4	85.494	94.252	-38.747	77.494	model.01	5	27.543	38.491	-8.772	17.543	59.951	1	9.73e-15	sig
Single_Model	TAG42:0-FA14:0	-1.27408	0.448746	-2.8392	0.00452274		Anova	model.00	4	85.494	94.252	-38.747	77.494	model.01	5	27.15	38.098	-8.575	17.15	60.344	1	7.97e-15	sig
Single_Model	TAG42:0-FA16:0	-1.17432	0.390501	-3.00721	0.0026366		Anova	model.00	4	85.494	94.252	-38.747	77.494	model.01	5	27.713	38.661	-8.856	17.713	59.781	1	1.06e-14	sig
Single_Model	TAG42:1-FA18:1	-1.26974	0.519671	-2.44336	0.0145512		Anova	model.00	4	85.494	94.252	-38.747	77.494	model.01	5	26.195	37.143	-8.097	16.195	61.299	1	4.9e-15	sig
Single_Model	TAG44:0-FA12:0	-1.2003	0.403075	-2.97785	0.00290275		Anova	model.00	4	85.494	94.252	-38.747	77.494	model.01	5	28.765	39.713	-9.382	18.765	58.729	1	1.81e-14	sig
Single_Model	TAG44:0-FA14:0	-1.20719	0.391176	-3.08606	0.00202826		Anova	model.00	4	85.494	94.252	-38.747	77.494	model.01	5	28.959	39.907	-9.479	18.959	58.535	1	2e-14	sig
Single_Model	TAG44:0-FA16:0	-1.23342	0.417679	-2.95305	0.00314656		Anova	model.00	4	85.494	94.252	-38.747	77.494	model.01	5	28.071	39.019	-9.035	18.071	59.423	1	1.27e-14	sig
Single_Model	TAG44:0-FA18:0	-1.5947	0.471946	-3.379	0.000727513		Anova	model.00	4	85.494	94.252	-38.747	77.494	model.01	5	28.805	39.754	-9.403	18.805	58.688	1	1.85e-14	sig
Single_Model	TAG44:1-FA12:0	-1.01675	0.327203	-3.10739	0.00188748		Anova	model.00	4	85.494	94.252	-38.747	77.494	model.01	5	29.623	40.571	-9.812	19.623	57.871	1	2.8e-14	sig
Single_Model	TAG44:1-FA14:0	-1.0569	0.333153	-3.1724	0.00151184		Anova	model.00	4	85.494	94.252	-38.747	77.494	model.01	5	29.578	40.526	-9.789	19.578	57.916	1	2.74e-14	sig
Single_Model	TAG44:1-FA16:0	-1.18057	0.456498	-2.58614	0.0097057		Anova	model.00	4	85.494	94.252	-38.747	77.494	model.01	5	26.901	37.849	-8.451	16.901	60.593	1	7.02e-15	sig
Single_Model	TAG44:1-FA16:1	-1.56959	0.67755	-2.31657	0.0205269		Anova	model.00	4	85.494	94.252	-38.747	77.494	model.01	5	26.331	37.279	-8.165	16.331	61.163	1	5.25e-15	sig
Single_Model	TAG44:1-FA18:1	-1.4883	0.648198	-2.29605	0.0216728		Anova	model.00	4	85.494	94.252	-38.747	77.494	model.01	5	25.665	36.613	-7.833	15.665	61.829	1	3.75e-15	sig
Single_Model	TAG44:2-FA16:0	-1.31606	0.566373	-2.32365	0.020144		Anova	model.00	4	85.494	94.252	-38.747	77.494	model.01	5	25.527	36.475	-7.763	15.527	61.967	1	3.49e-15	sig
Single_Model	TAG44:2-FA18:1	-1.40169	0.69833	-2.0072	0.0447284		Anova	model.00	4	85.494	94.252	-38.747	77.494	model.01	5	26.019	36.968	-8.01	16.019	61.474	1	4.49e-15	sig
Single_Model	TAG44:2-FA18:2	-1.32008	0.523601	-2.52116	0.0116968		Anova	model.00	4	85.494	94.252	-38.747	77.494	model.01	5	26.648	37.596	-8.324	16.648	60.846	1	6.17e-15	sig
Single_Model	TAG45:0-FA14:0	-1.36356	0.365343	-3.73227	0.000189762		Anova	model.00	4	85.494	94.252	-38.747	77.494	model.01	5	34.136	45.085	-12.068	24.136	53.357	1	2.78e-13	sig
Single_Model	TAG45:0-FA15:0	-1.27271	0.335001	-3.79912	0.000145213		Anova	model.00	4	85.494	94.252	-38.747	77.494	model.01	5	34.681	45.629	-12.34	24.681	52.813	1	3.67e-13	sig
Single_Model	TAG45:0-FA16:0	-1.5176	0.451557	-3.36081	0.000777136		Anova	model.00	4	85.494	94.252	-38.747	77.494	model.01	5	29.119	40.067	-9.559	19.119	58.375	1	2.17e-14	sig
Single_Model	TAG45:1-FA16:0	-1.24408	0.381027	-3.26507	0.00109438		Anova	model.00	4	85.494	94.252	-38.747	77.494	model.01	5	29.206	40.155	-9.603	19.206	58.288	1	2.27e-14	sig
Single_Model	TAG45:1-FA18:1	-1.65962	0.551074	-3.01161	0.00259865		Anova	model.00	4	85.494	94.252	-38.747	77.494	model.01	5	26.002	36.95	-8.001	16.002	61.492	1	4.45e-15	sig
Single_Model	TAG46:0-FA14:0	-1.16231	0.342363	-3.39498	0.000686336		Anova	model.00	4	85.494	94.252	-38.747	77.494	model.01	5	30.697	41.645	-10.348	20.697	56.797	1	4.83e-14	sig
Single_Model	TAG46:0-FA16:0	-1.11977	0.328818	-3.40545	0.000660553		Anova	model.00	4	85.494	94.252	-38.747	77.494	model.01	5	30.34	41.288	-10.17	20.34	57.154	1	4.03e-14	sig
Single_Model	TAG46:0-FA18:0	-1.46967	0.546037	-2.69153	0.00711258		Anova	model.00	4	85.494	94.252	-38.747	77.494	model.01	5	27.248	38.196	-8.624	17.248	60.246	1	8.37e-15	sig
Single_Model	TAG46:1-FA12:0	-1.13039	0.399289	-2.831	0.00464028		Anova	model.00	4	85.494	94.252	-38.747	77.494	model.01	5	27.986	38.934	-8.993	17.986	59.508	1	1.22e-14	sig
Single_Model	TAG46:1-FA14:0	-1.07008	0.348172	-3.07342	0.00211623		Anova	model.00	4	85.494	94.252	-38.747	77.494	model.01	5	29.837	40.785	-9.918	19.837	57.657	1	3.12e-14	sig
Single_Model	TAG46:1-FA14:1	-1.42261	0.500162	-2.84429	0.00445099		Anova	model.00	4	85.494	94.252	-38.747	77.494	model.01	5	28.69	39.638	-9.345	18.69	58.804	1	1.74e-14	sig
Single_Model	TAG46:1-FA16:0	-1.10177	0.381003	-2.89176	0.00383087		Anova	model.00	4	85.494	94.252	-38.747	77.494	model.01	5	28.448	39.396	-9.224	18.448	59.046	1	1.54e-14	sig
Single_Model	TAG46:1-FA16:1	-1.28557	0.456814	-2.81421	0.00488974		Anova	model.00	4	85.494	94.252	-38.747	77.494	model.01	5	28.343	39.291	-9.171	18.343	59.151	1	1.46e-14	sig
Single_Model	TAG46:1-FA18:0	-1.43946	0.542571	-2.65304	0.0079771		Anova	model.00	4	85.494	94.252	-38.747	77.494	model.01	5	26.922	37.87	-8.461	16.922	60.572	1	7.09e-15	sig
Single_Model	TAG46:1-FA18:1	-1.6309	0.763118	-2.13716	0.0325851		Anova	model.00	4	85.494	94.252	-38.747	77.494	model.01	5	25.383	36.331	-7.692	15.383	62.111	1	3.25e-15	sig
Single_Model	TAG46:2-FA12:0	-1.15153	0.430393	-2.67553	0.00746112		Anova	model.00	4	85.494	94.252	-38.747	77.494	model.01	5	27.686	38.634	-8.843	17.686	59.808	1	1.05e-14	sig
Single_Model	TAG46:2-FA14:0	-1.07063	0.359288	-2.97987	0.00288373		Anova	model.00	4	85.494	94.252	-38.747	77.494	model.01	5	29.728	40.676	-9.864	19.728	57.766	1	2.95e-14	sig
Single_Model	TAG46:2-FA16:0	-1.1273	0.415459	-2.71339	0.00665991		Anova	model.00	4	85.494	94.252	-38.747	77.494	model.01	5	27.763	38.711	-8.881	17.763	59.731	1	1.09e-14	sig
Single_Model	TAG46:2-FA16:1	-1.30594	0.519742	-2.51266	0.0119825		Anova	model.00	4	85.494	94.252	-38.747	77.494	model.01	5	27.713	38.661	-8.856	17.713	59.781	1	1.06e-14	sig
Single_Model	TAG46:2-FA18:1	-1.39247	0.535583	-2.59991	0.00932491		Anova	model.00	4	85.494	94.252	-38.747	77.494	model.01	5	27.064	38.013	-8.532	17.064	60.43	1	7.63e-15	sig
Single_Model	TAG46:2-FA18:2	-1.4677	0.660815	-2.22105	0.0263476		Anova	model.00	4	85.494	94.252	-38.747	77.494	model.01	5	26.295	37.244	-8.148	16.295	61.198	1	5.16e-15	sig
Single_Model	TAG46:3-FA18:1	-1.45459	0.544394	-2.67195	0.0075413		Anova	model.00	4	85.494	94.252	-38.747	77.494	model.01	5	27.323	38.271	-8.661	17.323	60.171	1	8.7e-15	sig
Single_Model	TAG46:3-FA18:2	-1.37511	0.539311	-2.54975	0.0107799		Anova	model.00	4	85.494	94.252	-38.747	77.494	model.01	5	27.477	38.425	-8.739	17.477	60.017	1	9.41e-15	sig
Single_Model	TAG47:0-FA14:0	-1.4992	0.436058	-3.43807	0.000585871		Anova	model.00	4	85.494	94.252	-38.747	77.494	model.01	5	30.769	41.717	-10.384	20.769	56.725	1	5.01e-14	sig
Single_Model	TAG47:0-FA15:0	-1.83078	0.570504	-3.20906	0.00133168		Anova	model.00	4	85.494	94.252	-38.747	77.494	model.01	5	28.835	39.783	-9.417	18.835	58.659	1	1.88e-14	sig
Single_Model	TAG47:0-FA16:0	-1.51781	0.430737	-3.52374	0.000425496		Anova	model.00	4	85.494	94.252	-38.747	77.494	model.01	5	31.865	42.813	-10.933	21.865	55.629	1	8.75e-14	sig
Single_Model	TAG47:0-FA17:0	-1.9911	0.702725	-2.83339	0.00460564		Anova	model.00	4	85.494	94.252	-38.747	77.494	model.01	5	27.469	38.417	-8.735	17.469	60.025	1	9.37e-15	sig
Single_Model	TAG47:1-FA14:0	-1.23204	0.369383	-3.33539	0.000851801		Anova	model.00	4	85.494	94.252	-38.747	77.494	model.01	5	30.981	41.929	-10.49	20.981	56.513	1	5.58e-14	sig
Single_Model	TAG47:1-FA15:0	-1.45034	0.477076	-3.04007	0.00236524		Anova	model.00	4	85.494	94.252	-38.747	77.494	model.01	5	28.435	39.383	-9.217	18.435	59.059	1	1.53e-14	sig
Single_Model	TAG47:1-FA16:0	-1.36682	0.428583	-3.18917	0.0014268		Anova	model.00	4	85.494	94.252	-38.747	77.494	model.01	5	29.906	40.854	-9.953	19.906	57.588	1	3.23e-14	sig
Single_Model	TAG47:1-FA16:1	-3.95778	1.44955	-2.73035	0.00632662		Anova	model.00	4	85.494	94.252	-38.747	77.494	model.01	5	31.666	42.614	-10.833	21.666	55.828	1	7.91e-14	sig
Single_Model	TAG47:1-FA18:1	-1.59382	0.526545	-3.02695	0.00247038		Anova	model.00	4	85.494	94.252	-38.747	77.494	model.01	5	26.705	37.654	-8.353	16.705	60.788	1	6.36e-15	sig
Single_Model	TAG47:2-FA16:1	-1.78793	0.560614	-3.18923	0.00142654		Anova	model.00	4	85.494	94.252	-38.747	77.494	model.01	5	30.143	41.091	-10.071	20.143	57.351	1	3.65e-14	sig
Single_Model	TAG47:2-FA18:1	-1.4858	0.456438	-3.25521	0.00113308		Anova	model.00	4	85.494	94.252	-38.747	77.494	model.01	5	27.49	38.439	-8.745	17.49	60.004	1	9.47e-15	sig
Single_Model	TAG47:2-FA18:2	-1.23763	0.364846	-3.39219	0.000693362		Anova	model.00	4	85.494	94.252	-38.747	77.494	model.01	5	31.339	42.288	-10.67	21.339	56.154	1	6.7e-14	sig
Single_Model	TAG48:0-FA14:0	-1.24154	0.40517	-3.06425	0.00218214		Anova	model.00	4	85.494	94.252	-38.747	77.494	model.01	5	29.389	40.337	-9.694	19.389	58.105	1	2.49e-14	sig
Single_Model	TAG48:0-FA16:0	-1.26204	0.355586	-3.5492	0.000386407		Anova	model.00	4	85.494	94.252	-38.747	77.494	model.01	5	31.013	41.962	-10.507	21.013	56.48	1	5.68e-14	sig
Single_Model	TAG48:0-FA18:0	-1.23304	0.385342	-3.19986	0.00137494		Anova	model.00	4	85.494	94.252	-38.747	77.494	model.01	5	29.801	40.749	-9.9	19.801	57.693	1	3.06e-14	sig
Single_Model	TAG48:1-FA12:0	-1.02812	0.306748	-3.35167	0.000803264		Anova	model.00	4	85.494	94.252	-38.747	77.494	model.01	5	30.783	41.732	-10.392	20.783	56.71	1	5.05e-14	sig
Single_Model	TAG48:1-FA14:0	-1.15146	0.399924	-2.8792	0.00398691		Anova	model.00	4	85.494	94.252	-38.747	77.494	model.01	5	28.613	39.562	-9.307	18.613	58.88	1	1.68e-14	sig
Single_Model	TAG48:1-FA16:0	-1.12838	0.3838	-2.94003	0.00328179		Anova	model.00	4	85.494	94.252	-38.747	77.494	model.01	5	28.851	39.799	-9.425	18.851	58.643	1	1.89e-14	sig
Single_Model	TAG48:1-FA16:1	-1.26929	0.440524	-2.88133	0.00396		Anova	model.00	4	85.494	94.252	-38.747	77.494	model.01	5	28.631	39.58	-9.316	18.631	58.862	1	1.69e-14	sig
Single_Model	TAG48:1-FA18:0	-1.18369	0.413961	-2.85943	0.00424406		Anova	model.00	4	85.494	94.252	-38.747	77.494	model.01	5	28.551	39.499	-9.275	18.551	58.943	1	1.62e-14	sig
Single_Model	TAG48:1-FA18:1	-1.12477	0.392645	-2.8646	0.00417542		Anova	model.00	4	85.494	94.252	-38.747	77.494	model.01	5	28.411	39.359	-9.206	18.411	59.083	1	1.51e-14	sig
Single_Model	TAG48:2-FA12:0	-1.20465	0.468122	-2.57337	0.0100714		Anova	model.00	4	85.494	94.252	-38.747	77.494	model.01	5	27.171	38.12	-8.586	17.171	60.322	1	8.05e-15	sig
Single_Model	TAG48:2-FA14:0	-1.13604	0.394483	-2.87981	0.00397913		Anova	model.00	4	85.494	94.252	-38.747	77.494	model.01	5	28.986	39.934	-9.493	18.986	58.508	1	2.03e-14	sig
Single_Model	TAG48:2-FA14:1	-1.17228	0.447684	-2.61854	0.00883058		Anova	model.00	4	85.494	94.252	-38.747	77.494	model.01	5	28.528	39.476	-9.264	18.528	58.966	1	1.6e-14	sig
Single_Model	TAG48:2-FA16:0	-1.1015	0.38316	-2.87479	0.00404299		Anova	model.00	4	85.494	94.252	-38.747	77.494	model.01	5	28.836	39.784	-9.418	18.836	58.658	1	1.88e-14	sig
Single_Model	TAG48:2-FA16:1	-1.16941	0.430178	-2.71842	0.00655942		Anova	model.00	4	85.494	94.252	-38.747	77.494	model.01	5	28.041	38.989	-9.02	18.041	59.453	1	1.25e-14	sig
Single_Model	TAG48:2-FA18:1	-1.11758	0.413429	-2.7032	0.00686747		Anova	model.00	4	85.494	94.252	-38.747	77.494	model.01	5	27.869	38.817	-8.935	17.869	59.625	1	1.15e-14	sig
Single_Model	TAG48:2-FA18:2	-1.12858	0.387091	-2.91553	0.00355081		Anova	model.00	4	85.494	94.252	-38.747	77.494	model.01	5	28.92	39.868	-9.46	18.92	58.574	1	1.96e-14	sig
Single_Model	TAG48:3-FA12:0	-1.17856	0.450916	-2.61369	0.00895697		Anova	model.00	4	85.494	94.252	-38.747	77.494	model.01	5	27.704	38.652	-8.852	17.704	59.79	1	1.06e-14	sig
Single_Model	TAG48:3-FA14:0	-1.22785	0.484662	-2.53342	0.0112957		Anova	model.00	4	85.494	94.252	-38.747	77.494	model.01	5	27.979	38.928	-8.99	17.979	59.515	1	1.21e-14	sig
Single_Model	TAG48:3-FA14:1	-1.27155	0.52113	-2.43999	0.0146876		Anova	model.00	4	85.494	94.252	-38.747	77.494	model.01	5	27.895	38.843	-8.947	17.895	59.599	1	1.16e-14	sig
Single_Model	TAG48:3-FA16:0	-1.17102	0.462476	-2.53208	0.0113389		Anova	model.00	4	85.494	94.252	-38.747	77.494	model.01	5	27.974	38.922	-8.987	17.974	59.52	1	1.21e-14	sig
Single_Model	TAG48:3-FA16:1	-1.61573	0.761729	-2.12114	0.0339104		Anova	model.00	4	85.494	94.252	-38.747	77.494	model.01	5	25.547	36.495	-7.773	15.547	61.947	1	3.53e-15	sig
Single_Model	TAG48:3-FA18:1	-1.14747	0.444239	-2.58301	0.00979428		Anova	model.00	4	85.494	94.252	-38.747	77.494	model.01	5	27.921	38.869	-8.961	17.921	59.573	1	1.18e-14	sig
Single_Model	TAG48:3-FA18:2	-1.11764	0.41253	-2.70922	0.00674406		Anova	model.00	4	85.494	94.252	-38.747	77.494	model.01	5	28.432	39.381	-9.216	18.432	59.062	1	1.53e-14	sig
Single_Model	TAG48:4-FA16:1	-2.40563	1.30146	-1.84841	0.0645425		Anova	model.00	4	85.494	94.252	-38.747	77.494	model.01	5	23.44	34.388	-6.72	13.44	64.054	1	1.21e-15	nsig
Single_Model	TAG48:4-FA18:2	-1.30737	0.549536	-2.37905	0.0173573		Anova	model.00	4	85.494	94.252	-38.747	77.494	model.01	5	27.333	38.281	-8.666	17.333	60.161	1	8.74e-15	sig
Single_Model	TAG49:0-FA15:0	-1.53961	0.456399	-3.37339	0.000742488		Anova	model.00	4	85.494	94.252	-38.747	77.494	model.01	5	30.02	40.968	-10.01	20.02	57.474	1	3.43e-14	sig
Single_Model	TAG49:0-FA16:0	-1.60055	0.532339	-3.00663	0.00264159		Anova	model.00	4	85.494	94.252	-38.747	77.494	model.01	5	32.289	43.237	-11.144	22.289	55.205	1	1.09e-13	sig
Single_Model	TAG49:0-FA17:0	-1.63464	0.484509	-3.37381	0.000741355		Anova	model.00	4	85.494	94.252	-38.747	77.494	model.01	5	31.479	42.427	-10.74	21.479	56.015	1	7.19e-14	sig
Single_Model	TAG49:0-FA18:0	-1.45493	0.393709	-3.69545	0.000219499		Anova	model.00	4	85.494	94.252	-38.747	77.494	model.01	5	33.336	44.284	-11.668	23.336	54.158	1	1.85e-13	sig
Single_Model	TAG49:1-FA14:0	-1.27691	0.41697	-3.06236	0.00219595		Anova	model.00	4	85.494	94.252	-38.747	77.494	model.01	5	29.668	40.617	-9.834	19.668	57.825	1	2.86e-14	sig
Single_Model	TAG49:1-FA15:0	-1.26781	0.380088	-3.33557	0.000851246		Anova	model.00	4	85.494	94.252	-38.747	77.494	model.01	5	30.034	40.982	-10.017	20.034	57.46	1	3.45e-14	sig
Single_Model	TAG49:1-FA16:0	-1.3488	0.41358	-3.26129	0.00110906		Anova	model.00	4	85.494	94.252	-38.747	77.494	model.01	5	30.006	40.955	-10.003	20.006	57.487	1	3.4e-14	sig
Single_Model	TAG49:1-FA16:1	-3.38873	1.67734	-2.0203	0.0433523		Anova	model.00	4	85.494	94.252	-38.747	77.494	model.01	5	23.804	34.753	-6.902	13.804	63.689	1	1.46e-15	sig
Single_Model	TAG49:1-FA17:0	-1.12932	0.315547	-3.57893	0.000345005		Anova	model.00	4	85.494	94.252	-38.747	77.494	model.01	5	33.449	44.397	-11.724	23.449	54.045	1	1.96e-13	sig
Single_Model	TAG49:1-FA18:1	-1.32114	0.417036	-3.16792	0.00153531		Anova	model.00	4	85.494	94.252	-38.747	77.494	model.01	5	29.307	40.255	-9.654	19.307	58.187	1	2.38e-14	sig
Single_Model	TAG49:2-FA14:0	-1.67429	0.754772	-2.21827	0.0265362		Anova	model.00	4	85.494	94.252	-38.747	77.494	model.01	5	25.886	36.834	-7.943	15.886	61.608	1	4.19e-15	sig
Single_Model	TAG49:2-FA15:0	-1.21164	0.355069	-3.41242	0.000643898		Anova	model.00	4	85.494	94.252	-38.747	77.494	model.01	5	30.898	41.846	-10.449	20.898	56.596	1	5.35e-14	sig
Single_Model	TAG49:2-FA16:0	-1.40567	0.443912	-3.16656	0.00154255		Anova	model.00	4	85.494	94.252	-38.747	77.494	model.01	5	29.385	40.334	-9.693	19.385	58.108	1	2.48e-14	sig
Single_Model	TAG49:2-FA16:1	-2.36127	0.978567	-2.41299	0.0158223		Anova	model.00	4	85.494	94.252	-38.747	77.494	model.01	5	25.447	36.396	-7.724	15.447	62.046	1	3.36e-15	sig
Single_Model	TAG49:2-FA18:1	-1.25727	0.432543	-2.90669	0.00365279		Anova	model.00	4	85.494	94.252	-38.747	77.494	model.01	5	28.63	39.579	-9.315	18.63	58.864	1	1.69e-14	sig
Single_Model	TAG49:2-FA18:2	-1.28186	0.372298	-3.44312	0.00057505		Anova	model.00	4	85.494	94.252	-38.747	77.494	model.01	5	31.307	42.256	-10.654	21.307	56.187	1	6.59e-14	sig
Single_Model	TAG49:3-FA16:1	-2.24829	0.889564	-2.52741	0.0114907		Anova	model.00	4	85.494	94.252	-38.747	77.494	model.01	5	26.662	37.611	-8.331	16.662	60.831	1	6.22e-15	sig
Single_Model	TAG49:3-FA18:2	-1.21366	0.392713	-3.09046	0.00199846		Anova	model.00	4	85.494	94.252	-38.747	77.494	model.01	5	30.258	41.206	-10.129	20.258	57.236	1	3.87e-14	sig
Single_Model	TAG50:0-FA14:0	-1.44972	0.488926	-2.96511	0.00302578		Anova	model.00	4	85.494	94.252	-38.747	77.494	model.01	5	28.507	39.455	-9.253	18.507	58.987	1	1.59e-14	sig
Single_Model	TAG50:0-FA16:0	-1.4461	0.461488	-3.13356	0.00172701		Anova	model.00	4	85.494	94.252	-38.747	77.494	model.01	5	29.121	40.069	-9.561	19.121	58.373	1	2.17e-14	sig
Single_Model	TAG50:0-FA18:0	-1.51424	0.472058	-3.20773	0.00133785		Anova	model.00	4	85.494	94.252	-38.747	77.494	model.01	5	29.996	40.945	-9.998	19.996	57.497	1	3.38e-14	sig
Single_Model	TAG50:1-FA14:0	-1.27144	0.460817	-2.7591	0.00579601		Anova	model.00	4	85.494	94.252	-38.747	77.494	model.01	5	28.467	39.415	-9.234	18.467	59.027	1	1.56e-14	sig
Single_Model	TAG50:1-FA16:0	-1.28313	0.444865	-2.8843	0.00392281		Anova	model.00	4	85.494	94.252	-38.747	77.494	model.01	5	28.164	39.112	-9.082	18.164	59.33	1	1.33e-14	sig
Single_Model	TAG50:1-FA16:1	-1.20974	0.409191	-2.95642	0.0031123		Anova	model.00	4	85.494	94.252	-38.747	77.494	model.01	5	29.318	40.267	-9.659	19.318	58.175	1	2.4e-14	sig
Single_Model	TAG50:1-FA18:0	-1.25567	0.443915	-2.82863	0.0046747		Anova	model.00	4	85.494	94.252	-38.747	77.494	model.01	5	28.772	39.721	-9.386	18.772	58.721	1	1.82e-14	sig
Single_Model	TAG50:1-FA18:1	-1.27322	0.440073	-2.89321	0.0038133		Anova	model.00	4	85.494	94.252	-38.747	77.494	model.01	5	28.333	39.281	-9.166	18.333	59.161	1	1.45e-14	sig
Single_Model	TAG50:2-FA14:0	-1.15256	0.409366	-2.81547	0.00487066		Anova	model.00	4	85.494	94.252	-38.747	77.494	model.01	5	28.418	39.366	-9.209	18.418	59.076	1	1.52e-14	sig
Single_Model	TAG50:2-FA14:1	-1.39925	0.540226	-2.59011	0.00959444		Anova	model.00	4	85.494	94.252	-38.747	77.494	model.01	5	27.61	38.558	-8.805	17.61	59.884	1	1.01e-14	sig
Single_Model	TAG50:2-FA16:0	-1.25328	0.445952	-2.81035	0.00494869		Anova	model.00	4	85.494	94.252	-38.747	77.494	model.01	5	28.127	39.076	-9.064	18.127	59.366	1	1.31e-14	sig
Single_Model	TAG50:2-FA16:1	-1.18728	0.443019	-2.67998	0.00736257		Anova	model.00	4	85.494	94.252	-38.747	77.494	model.01	5	27.643	38.592	-8.822	17.643	59.85	1	1.02e-14	sig
Single_Model	TAG50:2-FA18:0	-1.18235	0.388037	-3.04701	0.00231127		Anova	model.00	4	85.494	94.252	-38.747	77.494	model.01	5	30.025	40.974	-10.013	20.025	57.469	1	3.43e-14	sig
Single_Model	TAG50:2-FA18:1	-1.12391	0.403568	-2.78494	0.00535373		Anova	model.00	4	85.494	94.252	-38.747	77.494	model.01	5	27.951	38.899	-8.976	17.951	59.543	1	1.2e-14	sig
Single_Model	TAG50:2-FA18:2	-1.31609	0.444545	-2.96054	0.00307104		Anova	model.00	4	85.494	94.252	-38.747	77.494	model.01	5	28.585	39.533	-9.293	18.585	58.909	1	1.65e-14	sig
Single_Model	TAG50:3-FA14:0	-1.15798	0.415015	-2.7902	0.00526754		Anova	model.00	4	85.494	94.252	-38.747	77.494	model.01	5	28.708	39.656	-9.354	18.708	58.786	1	1.76e-14	sig
Single_Model	TAG50:3-FA14:1	-1.17653	0.422089	-2.78739	0.00531338		Anova	model.00	4	85.494	94.252	-38.747	77.494	model.01	5	28.639	39.587	-9.319	18.639	58.855	1	1.7e-14	sig
Single_Model	TAG50:3-FA16:0	-1.22315	0.468204	-2.61244	0.00898999		Anova	model.00	4	85.494	94.252	-38.747	77.494	model.01	5	27.825	38.774	-8.913	17.825	59.669	1	1.12e-14	sig
Single_Model	TAG50:3-FA16:1	-1.20106	0.46021	-2.6098	0.0090595		Anova	model.00	4	85.494	94.252	-38.747	77.494	model.01	5	27.783	38.731	-8.891	17.783	59.711	1	1.1e-14	sig
Single_Model	TAG50:3-FA18:1	-1.12685	0.409803	-2.74973	0.00596453		Anova	model.00	4	85.494	94.252	-38.747	77.494	model.01	5	28.369	39.317	-9.185	18.369	59.125	1	1.48e-14	sig
Single_Model	TAG50:3-FA18:2	-1.16724	0.429482	-2.71777	0.0065723		Anova	model.00	4	85.494	94.252	-38.747	77.494	model.01	5	28.3	39.248	-9.15	18.3	59.194	1	1.43e-14	sig
Single_Model	TAG50:3-FA18:3	-1.047	0.300525	-3.4839	0.000494161		Anova	model.00	4	85.494	94.252	-38.747	77.494	model.01	5	31.524	42.472	-10.762	21.524	55.97	1	7.36e-14	sig
Single_Model	TAG50:4-FA14:0	-1.24003	0.456585	-2.71588	0.0066099		Anova	model.00	4	85.494	94.252	-38.747	77.494	model.01	5	28.325	39.273	-9.162	18.325	59.169	1	1.45e-14	sig
Single_Model	TAG50:4-FA14:1	-1.18642	0.412685	-2.87489	0.00404174		Anova	model.00	4	85.494	94.252	-38.747	77.494	model.01	5	29.085	40.033	-9.543	19.085	58.409	1	2.13e-14	sig
Single_Model	TAG50:4-FA16:0	-1.34527	0.568955	-2.36445	0.0180567		Anova	model.00	4	85.494	94.252	-38.747	77.494	model.01	5	27.206	38.155	-8.603	17.206	60.288	1	8.2e-15	sig
Single_Model	TAG50:4-FA16:1	-1.2068	0.459972	-2.62365	0.00869942		Anova	model.00	4	85.494	94.252	-38.747	77.494	model.01	5	27.833	38.781	-8.916	17.833	59.661	1	1.13e-14	sig
Single_Model	TAG50:4-FA18:1	-1.02174	0.321395	-3.17909	0.00147739		Anova	model.00	4	85.494	94.252	-38.747	77.494	model.01	5	30.9	41.849	-10.45	20.9	56.593	1	5.36e-14	sig
Single_Model	TAG50:4-FA18:2	-1.16302	0.405336	-2.86928	0.00411411		Anova	model.00	4	85.494	94.252	-38.747	77.494	model.01	5	29.222	40.17	-9.611	19.222	58.272	1	2.28e-14	sig
Single_Model	TAG50:4-FA18:3	-1.17269	0.446086	-2.62884	0.0085676		Anova	model.00	4	85.494	94.252	-38.747	77.494	model.01	5	27.365	38.313	-8.682	17.365	60.129	1	8.89e-15	sig
Single_Model	TAG51:0-FA16:0	-1.72559	0.608424	-2.83617	0.0045658		Anova	model.00	4	85.494	94.252	-38.747	77.494	model.01	5	31.897	42.845	-10.949	21.897	55.597	1	8.9e-14	sig
Single_Model	TAG51:0-FA17:0	-1.63877	0.545058	-3.00659	0.00264196		Anova	model.00	4	85.494	94.252	-38.747	77.494	model.01	5	32.151	43.1	-11.076	22.151	55.342	1	1.01e-13	sig
Single_Model	TAG51:0-FA18:0	-1.82999	0.648056	-2.82381	0.0047457		Anova	model.00	4	85.494	94.252	-38.747	77.494	model.01	5	32.019	42.967	-11.01	22.019	55.475	1	9.47e-14	sig
Single_Model	TAG51:1-FA15:0	-1.48821	0.460633	-3.23079	0.00123449		Anova	model.00	4	85.494	94.252	-38.747	77.494	model.01	5	29.179	40.127	-9.589	19.179	58.315	1	2.23e-14	sig
Single_Model	TAG51:1-FA16:0	-1.45298	0.447516	-3.24677	0.00116723		Anova	model.00	4	85.494	94.252	-38.747	77.494	model.01	5	29.457	40.406	-9.729	19.457	58.036	1	2.57e-14	sig
Single_Model	TAG51:1-FA17:0	-1.41408	0.444613	-3.18047	0.00147038		Anova	model.00	4	85.494	94.252	-38.747	77.494	model.01	5	29.469	40.417	-9.734	19.469	58.025	1	2.59e-14	sig
Single_Model	TAG51:1-FA18:0	-1.50109	0.4634	-3.2393	0.00119822		Anova	model.00	4	85.494	94.252	-38.747	77.494	model.01	5	29.551	40.499	-9.775	19.551	57.943	1	2.7e-14	sig
Single_Model	TAG51:1-FA18:1	-1.45646	0.469633	-3.10127	0.00192694		Anova	model.00	4	85.494	94.252	-38.747	77.494	model.01	5	28.898	39.846	-9.449	18.898	58.596	1	1.94e-14	sig
Single_Model	TAG51:2-FA15:0	-1.27946	0.410014	-3.12052	0.00180533		Anova	model.00	4	85.494	94.252	-38.747	77.494	model.01	5	29.07	40.018	-9.535	19.07	58.424	1	2.11e-14	sig
Single_Model	TAG51:2-FA16:0	-1.73396	0.618675	-2.8027	0.00506768		Anova	model.00	4	85.494	94.252	-38.747	77.494	model.01	5	27.273	38.222	-8.637	17.273	60.22	1	8.48e-15	sig
Single_Model	TAG51:2-FA16:1	-1.18676	0.355249	-3.34065	0.000835809		Anova	model.00	4	85.494	94.252	-38.747	77.494	model.01	5	31.575	42.523	-10.787	21.575	55.919	1	7.55e-14	sig
Single_Model	TAG51:2-FA17:0	-1.32782	0.407367	-3.25953	0.00111599		Anova	model.00	4	85.494	94.252	-38.747	77.494	model.01	5	30.109	41.057	-10.054	20.109	57.385	1	3.58e-14	sig
Single_Model	TAG51:2-FA18:1	-1.46847	0.559884	-2.62281	0.00872079		Anova	model.00	4	85.494	94.252	-38.747	77.494	model.01	5	27.015	37.963	-8.507	17.015	60.479	1	7.44e-15	sig
Single_Model	TAG51:2-FA18:2	-1.4055	0.409107	-3.43552	0.000591425		Anova	model.00	4	85.494	94.252	-38.747	77.494	model.01	5	30.863	41.811	-10.432	20.863	56.631	1	5.26e-14	sig
Single_Model	TAG51:3-FA15:0	-1.26785	0.421209	-3.01002	0.00261232		Anova	model.00	4	85.494	94.252	-38.747	77.494	model.01	5	29.014	39.963	-9.507	19.014	58.48	1	2.05e-14	sig
Single_Model	TAG51:3-FA16:1	-1.44051	0.530515	-2.71531	0.0066213		Anova	model.00	4	85.494	94.252	-38.747	77.494	model.01	5	28.109	39.057	-9.054	18.109	59.385	1	1.3e-14	sig
Single_Model	TAG51:3-FA18:2	-1.31651	0.454765	-2.89491	0.00379262		Anova	model.00	4	85.494	94.252	-38.747	77.494	model.01	5	28.8	39.748	-9.4	18.8	58.694	1	1.84e-14	sig
Single_Model	TAG51:4-FA15:0	-1.23725	0.367354	-3.368	0.000757155		Anova	model.00	4	85.494	94.252	-38.747	77.494	model.01	5	31.209	42.158	-10.605	21.209	56.285	1	6.27e-14	sig
Single_Model	TAG51:4-FA16:1	-1.86521	0.669833	-2.78459	0.00535952		Anova	model.00	4	85.494	94.252	-38.747	77.494	model.01	5	26.743	37.691	-8.371	16.743	60.751	1	6.48e-15	sig
Single_Model	TAG51:4-FA18:2	-1.49906	0.51039	-2.93709	0.00331312		Anova	model.00	4	85.494	94.252	-38.747	77.494	model.01	5	28.73	39.678	-9.365	18.73	58.764	1	1.78e-14	sig
Single_Model	TAG52:0-FA16:0	-1.68033	0.549457	-3.05817	0.00222692		Anova	model.00	4	85.494	94.252	-38.747	77.494	model.01	5	28.445	39.394	-9.223	18.445	59.049	1	1.54e-14	sig
Single_Model	TAG52:0-FA18:0	-1.69832	0.528639	-3.21263	0.00131527		Anova	model.00	4	85.494	94.252	-38.747	77.494	model.01	5	29.636	40.584	-9.818	19.636	57.858	1	2.82e-14	sig
Single_Model	TAG52:0-FA20:0	-1.49321	0.408619	-3.65427	0.000257912		Anova	model.00	4	85.494	94.252	-38.747	77.494	model.01	5	33.866	44.814	-11.933	23.866	53.628	1	2.42e-13	sig
Single_Model	TAG52:1-FA16:0	-1.44366	0.550416	-2.62286	0.00871958		Anova	model.00	4	85.494	94.252	-38.747	77.494	model.01	5	27.007	37.955	-8.504	17.007	60.487	1	7.41e-15	sig
Single_Model	TAG52:1-FA16:1	-1.35668	0.442778	-3.06401	0.00218392		Anova	model.00	4	85.494	94.252	-38.747	77.494	model.01	5	29.712	40.661	-9.856	19.712	57.781	1	2.93e-14	sig
Single_Model	TAG52:1-FA18:0	-1.47795	0.551173	-2.68147	0.00732989		Anova	model.00	4	85.494	94.252	-38.747	77.494	model.01	5	27.447	38.395	-8.723	17.447	60.047	1	9.26e-15	sig
Single_Model	TAG52:1-FA18:1	-1.38069	0.51734	-2.66883	0.00761153		Anova	model.00	4	85.494	94.252	-38.747	77.494	model.01	5	27.274	38.222	-8.637	17.274	60.22	1	8.48e-15	sig
Single_Model	TAG52:1-FA20:0	-1.47195	0.474075	-3.10489	0.0019035		Anova	model.00	4	85.494	94.252	-38.747	77.494	model.01	5	29.546	40.494	-9.773	19.546	57.948	1	2.69e-14	sig
Single_Model	TAG52:1-FA20:1	-1.46357	0.46472	-3.14936	0.00163629		Anova	model.00	4	85.494	94.252	-38.747	77.494	model.01	5	29.532	40.48	-9.766	19.532	57.962	1	2.67e-14	sig
Single_Model	TAG52:2-FA16:0	-1.26765	0.479935	-2.6413	0.00825894		Anova	model.00	4	85.494	94.252	-38.747	77.494	model.01	5	27.107	38.055	-8.553	17.107	60.387	1	7.79e-15	sig
Single_Model	TAG52:2-FA16:1	-1.29015	0.481391	-2.68004	0.00736126		Anova	model.00	4	85.494	94.252	-38.747	77.494	model.01	5	27.608	38.556	-8.804	17.608	59.886	1	1.01e-14	sig
Single_Model	TAG52:2-FA18:0	-1.41961	0.506805	-2.80109	0.00509298		Anova	model.00	4	85.494	94.252	-38.747	77.494	model.01	5	28.119	39.068	-9.06	18.119	59.374	1	1.3e-14	sig
Single_Model	TAG52:2-FA18:1	-1.24672	0.467688	-2.66572	0.00768243		Anova	model.00	4	85.494	94.252	-38.747	77.494	model.01	5	27.08	38.028	-8.54	17.08	60.414	1	7.69e-15	sig
Single_Model	TAG52:2-FA18:2	-1.40781	0.507636	-2.77326	0.0055497		Anova	model.00	4	85.494	94.252	-38.747	77.494	model.01	5	27.823	38.771	-8.912	17.823	59.671	1	1.12e-14	sig
Single_Model	TAG52:2-FA20:1	-1.06566	0.324037	-3.2887	0.00100651		Anova	model.00	4	85.494	94.252	-38.747	77.494	model.01	5	30.698	41.647	-10.349	20.698	56.795	1	4.84e-14	sig
Single_Model	TAG52:2-FA20:2	-1.47311	0.466194	-3.15986	0.00157842		Anova	model.00	4	85.494	94.252	-38.747	77.494	model.01	5	29.393	40.341	-9.697	19.393	58.101	1	2.49e-14	sig
Single_Model	TAG52:3-FA14:0	-1.22306	0.3991	-3.06455	0.00217995		Anova	model.00	4	85.494	94.252	-38.747	77.494	model.01	5	29.553	40.501	-9.776	19.553	57.941	1	2.7e-14	sig
Single_Model	TAG52:3-FA16:0	-1.31564	0.522601	-2.51749	0.0118193		Anova	model.00	4	85.494	94.252	-38.747	77.494	model.01	5	26.976	37.924	-8.488	16.976	60.518	1	7.29e-15	sig
Single_Model	TAG52:3-FA16:1	-1.14676	0.409289	-2.80184	0.00508127		Anova	model.00	4	85.494	94.252	-38.747	77.494	model.01	5	27.833	38.781	-8.916	17.833	59.661	1	1.13e-14	sig
Single_Model	TAG52:3-FA18:0	-1.34142	0.491124	-2.73133	0.00630785		Anova	model.00	4	85.494	94.252	-38.747	77.494	model.01	5	28.428	39.377	-9.214	18.428	59.065	1	1.53e-14	sig
Single_Model	TAG52:3-FA18:1	-1.23607	0.465576	-2.65492	0.0079327		Anova	model.00	4	85.494	94.252	-38.747	77.494	model.01	5	27.329	38.277	-8.665	17.329	60.165	1	8.72e-15	sig
Single_Model	TAG52:3-FA18:2	-1.31612	0.517446	-2.5435	0.0109747		Anova	model.00	4	85.494	94.252	-38.747	77.494	model.01	5	27.073	38.021	-8.536	17.073	60.421	1	7.66e-15	sig
Single_Model	TAG52:3-FA18:3	-1.28319	0.469851	-2.73105	0.0063133		Anova	model.00	4	85.494	94.252	-38.747	77.494	model.01	5	27.677	38.626	-8.839	17.677	59.817	1	1.04e-14	sig
Single_Model	TAG52:3-FA20:2	-1.02605	0.310017	-3.30966	0.000934087		Anova	model.00	4	85.494	94.252	-38.747	77.494	model.01	5	31.473	42.421	-10.736	21.473	56.021	1	7.17e-14	sig
Single_Model	TAG52:3-FA20:3	-1.516	0.471383	-3.21606	0.00129962		Anova	model.00	4	85.494	94.252	-38.747	77.494	model.01	5	30.771	41.719	-10.386	20.771	56.723	1	5.02e-14	sig
Single_Model	TAG52:4-FA14:0	-1.96954	1.15217	-1.70941	0.0873743		Anova	model.00	4	85.494	94.252	-38.747	77.494	model.01	5	24.636	35.584	-7.318	14.636	62.858	1	2.22e-15	nsig
Single_Model	TAG52:4-FA16:0	-1.38295	0.550772	-2.51092	0.0120416		Anova	model.00	4	85.494	94.252	-38.747	77.494	model.01	5	27.08	38.029	-8.54	17.08	60.413	1	7.69e-15	sig
Single_Model	TAG52:4-FA16:1	-1.19397	0.430023	-2.77651	0.00549452		Anova	model.00	4	85.494	94.252	-38.747	77.494	model.01	5	28.152	39.1	-9.076	18.152	59.342	1	1.33e-14	sig
Single_Model	TAG52:4-FA18:1	-1.18828	0.433304	-2.74236	0.00609988		Anova	model.00	4	85.494	94.252	-38.747	77.494	model.01	5	27.878	38.827	-8.939	17.878	59.615	1	1.15e-14	sig
Single_Model	TAG52:4-FA18:2	-1.32211	0.498321	-2.65313	0.00797501		Anova	model.00	4	85.494	94.252	-38.747	77.494	model.01	5	27.658	38.607	-8.829	17.658	59.836	1	1.03e-14	sig
Single_Model	TAG52:4-FA18:3	-1.24981	0.477257	-2.61873	0.00882584		Anova	model.00	4	85.494	94.252	-38.747	77.494	model.01	5	27.184	38.132	-8.592	17.184	60.31	1	8.11e-15	sig
Single_Model	TAG52:4-FA20:3	-1.37372	0.53128	-2.58569	0.00971851		Anova	model.00	4	85.494	94.252	-38.747	77.494	model.01	5	28.102	39.051	-9.051	18.102	59.391	1	1.29e-14	sig
Single_Model	TAG52:4-FA20:4	-1.58828	0.579861	-2.73908	0.00616117		Anova	model.00	4	85.494	94.252	-38.747	77.494	model.01	5	27.328	38.276	-8.664	17.328	60.166	1	8.72e-15	sig
Single_Model	TAG52:5-FA16:0	-1.31412	0.521232	-2.52119	0.0116959		Anova	model.00	4	85.494	94.252	-38.747	77.494	model.01	5	26.94	37.888	-8.47	16.94	60.554	1	7.16e-15	sig
Single_Model	TAG52:5-FA16:1	-1.31606	0.497791	-2.6438	0.00819809		Anova	model.00	4	85.494	94.252	-38.747	77.494	model.01	5	28.064	39.012	-9.032	18.064	59.43	1	1.27e-14	sig
Single_Model	TAG52:5-FA18:1	-1.30502	0.499719	-2.61151	0.00901422		Anova	model.00	4	85.494	94.252	-38.747	77.494	model.01	5	27.892	38.84	-8.946	17.892	59.602	1	1.16e-14	sig
Single_Model	TAG52:5-FA18:2	-1.29716	0.473519	-2.73941	0.006155		Anova	model.00	4	85.494	94.252	-38.747	77.494	model.01	5	28.193	39.141	-9.096	18.193	59.301	1	1.35e-14	sig
Single_Model	TAG52:5-FA18:3	-1.23396	0.457562	-2.69682	0.00700049		Anova	model.00	4	85.494	94.252	-38.747	77.494	model.01	5	27.642	38.59	-8.821	17.642	59.852	1	1.02e-14	sig
Single_Model	TAG52:5-FA20:4	-1.37129	0.582051	-2.35596	0.018475		Anova	model.00	4	85.494	94.252	-38.747	77.494	model.01	5	27.113	38.061	-8.556	17.113	60.381	1	7.82e-15	sig
Single_Model	TAG52:5-FA20:5	-1.70117	0.513484	-3.31299	0.000923037		Anova	model.00	4	85.494	94.252	-38.747	77.494	model.01	5	29.988	40.937	-9.994	19.988	57.505	1	3.37e-14	sig
Single_Model	TAG52:5-FA22:5	-1.30947	0.424646	-3.08367	0.00204463		Anova	model.00	4	85.494	94.252	-38.747	77.494	model.01	5	27.077	38.025	-8.538	17.077	60.417	1	7.67e-15	sig
Single_Model	TAG52:6-FA16:0	-1.62949	0.574054	-2.83856	0.00453173		Anova	model.00	4	85.494	94.252	-38.747	77.494	model.01	5	25.742	36.69	-7.871	15.742	61.752	1	3.9e-15	sig
Single_Model	TAG52:6-FA18:2	-1.28111	0.421185	-3.04168	0.00235266		Anova	model.00	4	85.494	94.252	-38.747	77.494	model.01	5	29.916	40.865	-9.958	19.916	57.577	1	3.25e-14	sig
Single_Model	TAG52:6-FA18:3	-1.18861	0.411377	-2.88934	0.00386047		Anova	model.00	4	85.494	94.252	-38.747	77.494	model.01	5	28.483	39.432	-9.242	18.483	59.01	1	1.57e-14	sig
Single_Model	TAG52:6-FA20:4	-1.22363	0.398998	-3.06676	0.00216395		Anova	model.00	4	85.494	94.252	-38.747	77.494	model.01	5	29.963	40.911	-9.981	19.963	57.531	1	3.33e-14	sig
Single_Model	TAG52:6-FA22:6	-1.35977	0.497795	-2.73158	0.0063032		Anova	model.00	4	85.494	94.252	-38.747	77.494	model.01	5	27.346	38.295	-8.673	17.346	60.148	1	8.8e-15	sig
Single_Model	TAG52:7-FA16:0	-1.83055	0.68738	-2.66308	0.00774281		Anova	model.00	4	85.494	94.252	-38.747	77.494	model.01	5	30.873	41.822	-10.437	20.873	56.62	1	5.29e-14	sig
Single_Model	TAG52:7-FA18:1	-1.50927	0.501362	-3.01035	0.0026095		Anova	model.00	4	85.494	94.252	-38.747	77.494	model.01	5	28.615	39.563	-9.308	18.615	58.879	1	1.68e-14	sig
Single_Model	TAG52:8-FA16:1	-1.56188	0.510645	-3.05863	0.00222351		Anova	model.00	4	85.494	94.252	-38.747	77.494	model.01	5	29.652	40.6	-9.826	19.652	57.842	1	2.84e-14	sig
Single_Model	TAG53:0-FA16:0	-1.86262	0.80978	-2.30016	0.0214392		Anova	model.00	4	85.494	94.252	-38.747	77.494	model.01	5	28.947	39.895	-9.473	18.947	58.547	1	1.99e-14	sig
Single_Model	TAG53:1-FA16:0	-1.66515	0.736207	-2.2618	0.02371		Anova	model.00	4	85.494	94.252	-38.747	77.494	model.01	5	28.307	39.255	-9.153	18.307	59.187	1	1.43e-14	sig
Single_Model	TAG53:1-FA17:0	-1.57707	0.501175	-3.14674	0.00165104		Anova	model.00	4	85.494	94.252	-38.747	77.494	model.01	5	29.139	40.088	-9.57	19.139	58.354	1	2.19e-14	sig
Single_Model	TAG53:1-FA18:0	-1.57034	0.467604	-3.35826	0.000784351		Anova	model.00	4	85.494	94.252	-38.747	77.494	model.01	5	30.206	41.154	-10.103	20.206	57.288	1	3.77e-14	sig
Single_Model	TAG53:1-FA18:1	-1.71565	0.642091	-2.67197	0.00754081		Anova	model.00	4	85.494	94.252	-38.747	77.494	model.01	5	26.621	37.57	-8.311	16.621	60.873	1	6.09e-15	sig
Single_Model	TAG53:2-FA16:0	-1.36245	0.45019	-3.02639	0.00247492		Anova	model.00	4	85.494	94.252	-38.747	77.494	model.01	5	28.173	39.121	-9.086	18.173	59.321	1	1.34e-14	sig
Single_Model	TAG53:2-FA17:0	-1.38342	0.484588	-2.85485	0.00430578		Anova	model.00	4	85.494	94.252	-38.747	77.494	model.01	5	28.003	38.952	-9.002	18.003	59.49	1	1.23e-14	sig
Single_Model	TAG53:2-FA18:1	-1.53549	0.575016	-2.67035	0.00757728		Anova	model.00	4	85.494	94.252	-38.747	77.494	model.01	5	26.866	37.814	-8.433	16.866	60.628	1	6.9e-15	sig
Single_Model	TAG53:2-FA18:2	-1.58642	0.488188	-3.2496	0.00115568		Anova	model.00	4	85.494	94.252	-38.747	77.494	model.01	5	29.219	40.167	-9.61	19.219	58.275	1	2.28e-14	sig
Single_Model	TAG53:3-FA16:0	-1.43234	0.479287	-2.98849	0.00280363		Anova	model.00	4	85.494	94.252	-38.747	77.494	model.01	5	27.987	38.935	-8.993	17.987	59.507	1	1.22e-14	sig
Single_Model	TAG53:3-FA17:0	-1.42301	0.517664	-2.74891	0.00597932		Anova	model.00	4	85.494	94.252	-38.747	77.494	model.01	5	27.89	38.838	-8.945	17.89	59.604	1	1.16e-14	sig
Single_Model	TAG53:3-FA18:2	-1.44274	0.5319	-2.71243	0.00667929		Anova	model.00	4	85.494	94.252	-38.747	77.494	model.01	5	27.915	38.863	-8.957	17.915	59.579	1	1.18e-14	sig
Single_Model	TAG53:4-FA16:0	-1.59407	0.538224	-2.96172	0.0030593		Anova	model.00	4	85.494	94.252	-38.747	77.494	model.01	5	27.668	38.616	-8.834	17.668	59.826	1	1.04e-14	sig
Single_Model	TAG53:4-FA17:0	-1.26555	0.377505	-3.3524	0.000801145		Anova	model.00	4	85.494	94.252	-38.747	77.494	model.01	5	31.171	42.12	-10.586	21.171	56.322	1	6.15e-14	sig
Single_Model	TAG53:4-FA18:2	-1.97591	0.702211	-2.81384	0.00489535		Anova	model.00	4	85.494	94.252	-38.747	77.494	model.01	5	26.539	37.487	-8.269	16.539	60.955	1	5.84e-15	sig
Single_Model	TAG53:4-FA20:4	-1.93926	0.626071	-3.09751	0.00195156		Anova	model.00	4	85.494	94.252	-38.747	77.494	model.01	5	28.782	39.73	-9.391	18.782	58.712	1	1.83e-14	sig
Single_Model	TAG53:5-FA20:4	-1.78124	0.65196	-2.73213	0.00629266		Anova	model.00	4	85.494	94.252	-38.747	77.494	model.01	5	27.43	38.378	-8.715	17.43	60.064	1	9.18e-15	sig
Single_Model	TAG54:0-FA16:0	-2.21277	0.735514	-3.00847	0.00262565		Anova	model.00	4	85.494	94.252	-38.747	77.494	model.01	5	34.499	45.447	-12.25	24.499	52.995	1	3.35e-13	sig
Single_Model	TAG54:0-FA18:0	-1.9304	0.585328	-3.29798	0.000973817		Anova	model.00	4	85.494	94.252	-38.747	77.494	model.01	5	43.311	54.259	-16.655	33.311	44.183	1	2.99e-11	sig
Single_Model	TAG54:1-FA16:0	-1.77219	0.583477	-3.0373	0.00238711		Anova	model.00	4	85.494	94.252	-38.747	77.494	model.01	5	28.676	39.624	-9.338	18.676	58.818	1	1.73e-14	sig
Single_Model	TAG54:1-FA18:0	-1.90227	0.800574	-2.37614	0.017495		Anova	model.00	4	85.494	94.252	-38.747	77.494	model.01	5	26.211	37.159	-8.106	16.211	61.283	1	4.94e-15	sig
Single_Model	TAG54:1-FA18:1	-1.96164	0.861762	-2.27631	0.0228273		Anova	model.00	4	85.494	94.252	-38.747	77.494	model.01	5	25.299	36.248	-7.65	15.299	62.194	1	3.11e-15	sig
Single_Model	TAG54:1-FA20:0	-1.50736	0.472078	-3.19303	0.00140787		Anova	model.00	4	85.494	94.252	-38.747	77.494	model.01	5	29.404	40.352	-9.702	19.404	58.09	1	2.5e-14	sig
Single_Model	TAG54:1-FA20:1	-1.60006	0.5289	-3.02526	0.00248419		Anova	model.00	4	85.494	94.252	-38.747	77.494	model.01	5	28.666	39.615	-9.333	18.666	58.827	1	1.72e-14	sig
Single_Model	TAG54:2-FA16:0	-1.42614	0.503224	-2.83401	0.00459685		Anova	model.00	4	85.494	94.252	-38.747	77.494	model.01	5	27.834	38.782	-8.917	17.834	59.66	1	1.13e-14	sig
Single_Model	TAG54:2-FA18:0	-1.57339	0.643856	-2.44369	0.0145379		Anova	model.00	4	85.494	94.252	-38.747	77.494	model.01	5	26.386	37.334	-8.193	16.386	61.108	1	5.4e-15	sig
Single_Model	TAG54:2-FA18:1	-1.43553	0.573876	-2.50145	0.0123684		Anova	model.00	4	85.494	94.252	-38.747	77.494	model.01	5	26.364	37.312	-8.182	16.364	61.13	1	5.34e-15	sig
Single_Model	TAG54:2-FA18:2	-1.74506	0.653875	-2.6688	0.00761225		Anova	model.00	4	85.494	94.252	-38.747	77.494	model.01	5	27.284	38.232	-8.642	17.284	60.21	1	8.53e-15	sig
Single_Model	TAG54:2-FA20:0	-1.52364	0.459012	-3.31938	0.00090217		Anova	model.00	4	85.494	94.252	-38.747	77.494	model.01	5	29.643	40.591	-9.821	19.643	57.851	1	2.83e-14	sig
Single_Model	TAG54:2-FA20:1	-1.4565	0.567052	-2.56855	0.0102125		Anova	model.00	4	85.494	94.252	-38.747	77.494	model.01	5	26.869	37.818	-8.435	16.869	60.624	1	6.91e-15	sig
Single_Model	TAG54:2-FA20:2	-1.55706	0.511418	-3.04459	0.00232998		Anova	model.00	4	85.494	94.252	-38.747	77.494	model.01	5	28.932	39.881	-9.466	18.932	58.562	1	1.97e-14	sig
Single_Model	TAG54:3-FA16:0	-1.46108	0.546531	-2.67338	0.00750914		Anova	model.00	4	85.494	94.252	-38.747	77.494	model.01	5	27.44	38.388	-8.72	17.44	60.054	1	9.23e-15	sig
Single_Model	TAG54:3-FA16:1	-1.32796	0.459882	-2.88761	0.00388177		Anova	model.00	4	85.494	94.252	-38.747	77.494	model.01	5	28.179	39.127	-9.089	18.179	59.315	1	1.34e-14	sig
Single_Model	TAG54:3-FA18:0	-1.54831	0.619261	-2.50025	0.0124107		Anova	model.00	4	85.494	94.252	-38.747	77.494	model.01	5	26.935	37.884	-8.468	16.935	60.558	1	7.14e-15	sig
Single_Model	TAG54:3-FA18:1	-1.22967	0.440135	-2.79385	0.00520853		Anova	model.00	4	85.494	94.252	-38.747	77.494	model.01	5	27.135	38.084	-8.568	17.135	60.358	1	7.91e-15	sig
Single_Model	TAG54:3-FA18:2	-1.53282	0.630044	-2.43288	0.0149794		Anova	model.00	4	85.494	94.252	-38.747	77.494	model.01	5	26.66	37.608	-8.33	16.66	60.834	1	6.21e-15	sig
Single_Model	TAG54:3-FA20:1	-1.37731	0.514311	-2.67797	0.00740708		Anova	model.00	4	85.494	94.252	-38.747	77.494	model.01	5	27.345	38.293	-8.672	17.345	60.149	1	8.79e-15	sig
Single_Model	TAG54:3-FA20:2	-1.43405	0.560507	-2.55849	0.0105129		Anova	model.00	4	85.494	94.252	-38.747	77.494	model.01	5	26.969	37.917	-8.484	16.969	60.525	1	7.27e-15	sig
Single_Model	TAG54:3-FA20:3	-1.7954	0.585716	-3.06531	0.00217443		Anova	model.00	4	85.494	94.252	-38.747	77.494	model.01	5	29.798	40.746	-9.899	19.798	57.696	1	3.06e-14	sig
Single_Model	TAG54:4-FA16:0	-1.58809	0.647014	-2.45449	0.0141084		Anova	model.00	4	85.494	94.252	-38.747	77.494	model.01	5	26.606	37.554	-8.303	16.606	60.888	1	6.04e-15	sig
Single_Model	TAG54:4-FA16:1	-1.4074	0.543413	-2.58992	0.00959972		Anova	model.00	4	85.494	94.252	-38.747	77.494	model.01	5	27.393	38.341	-8.696	17.393	60.101	1	9.01e-15	sig
Single_Model	TAG54:4-FA18:0	-1.64079	0.648095	-2.53171	0.0113508		Anova	model.00	4	85.494	94.252	-38.747	77.494	model.01	5	27.12	38.068	-8.56	17.12	60.374	1	7.84e-15	sig
Single_Model	TAG54:4-FA18:1	-1.29965	0.492875	-2.63687	0.0083675		Anova	model.00	4	85.494	94.252	-38.747	77.494	model.01	5	27.015	37.963	-8.507	17.015	60.479	1	7.44e-15	sig
Single_Model	TAG54:4-FA18:2	-1.34096	0.509802	-2.63036	0.00852954		Anova	model.00	4	85.494	94.252	-38.747	77.494	model.01	5	27.165	38.113	-8.582	17.165	60.329	1	8.03e-15	sig
Single_Model	TAG54:4-FA18:3	-1.41085	0.549309	-2.56841	0.0102167		Anova	model.00	4	85.494	94.252	-38.747	77.494	model.01	5	26.966	37.914	-8.483	16.966	60.528	1	7.25e-15	sig
Single_Model	TAG54:4-FA20:2	-1.38246	0.519637	-2.66043	0.00780416		Anova	model.00	4	85.494	94.252	-38.747	77.494	model.01	5	27.545	38.493	-8.772	17.545	59.949	1	9.74e-15	sig
Single_Model	TAG54:4-FA20:3	-1.5905	0.631924	-2.51692	0.0118387		Anova	model.00	4	85.494	94.252	-38.747	77.494	model.01	5	27.248	38.196	-8.624	17.248	60.246	1	8.37e-15	sig
Single_Model	TAG54:4-FA20:4	-1.98589	0.811801	-2.44628	0.014434		Anova	model.00	4	85.494	94.252	-38.747	77.494	model.01	5	25.715	36.663	-7.858	15.715	61.779	1	3.84e-15	sig
Single_Model	TAG54:4-FA22:4	-1.54121	0.616883	-2.49839	0.0124759		Anova	model.00	4	85.494	94.252	-38.747	77.494	model.01	5	26.062	37.01	-8.031	16.062	61.432	1	4.58e-15	sig
Single_Model	TAG54:5-FA16:0	-1.76064	0.750124	-2.34714	0.0189183		Anova	model.00	4	85.494	94.252	-38.747	77.494	model.01	5	26.104	37.052	-8.052	16.104	61.39	1	4.68e-15	sig
Single_Model	TAG54:5-FA16:1	-1.48142	0.595957	-2.48578	0.0129268		Anova	model.00	4	85.494	94.252	-38.747	77.494	model.01	5	26.906	37.855	-8.453	16.906	60.587	1	7.04e-15	sig
Single_Model	TAG54:5-FA18:0	-1.51099	0.586667	-2.57555	0.0100082		Anova	model.00	4	85.494	94.252	-38.747	77.494	model.01	5	26.973	37.921	-8.486	16.973	60.521	1	7.28e-15	sig
Single_Model	TAG54:5-FA18:1	-1.40996	0.553191	-2.54878	0.0108101		Anova	model.00	4	85.494	94.252	-38.747	77.494	model.01	5	27.091	38.039	-8.546	17.091	60.403	1	7.73e-15	sig
Single_Model	TAG54:5-FA18:2	-1.43758	0.545898	-2.63342	0.0084529		Anova	model.00	4	85.494	94.252	-38.747	77.494	model.01	5	27.409	38.358	-8.705	17.409	60.084	1	9.09e-15	sig
Single_Model	TAG54:5-FA18:3	-1.266	0.463632	-2.73062	0.00632153		Anova	model.00	4	85.494	94.252	-38.747	77.494	model.01	5	27.496	38.444	-8.748	17.496	59.998	1	9.5e-15	sig
Single_Model	TAG54:5-FA20:2	-1.40617	0.484169	-2.9043	0.00368075		Anova	model.00	4	85.494	94.252	-38.747	77.494	model.01	5	28.247	39.195	-9.123	18.247	59.247	1	1.39e-14	sig
Single_Model	TAG54:5-FA20:3	-1.50315	0.54571	-2.75448	0.00587861		Anova	model.00	4	85.494	94.252	-38.747	77.494	model.01	5	28.3	39.248	-9.15	18.3	59.194	1	1.43e-14	sig
Single_Model	TAG54:5-FA20:4	-1.79724	0.902371	-1.99169	0.0464051		Anova	model.00	4	85.494	94.252	-38.747	77.494	model.01	5	25.305	36.253	-7.652	15.305	62.189	1	3.12e-15	sig
Single_Model	TAG54:5-FA22:4	-1.28437	0.49022	-2.61998	0.00879352		Anova	model.00	4	85.494	94.252	-38.747	77.494	model.01	5	26.46	37.409	-8.23	16.46	61.034	1	5.61e-15	sig
Single_Model	TAG54:5-FA22:5	-1.59331	0.506596	-3.14513	0.00166011		Anova	model.00	4	85.494	94.252	-38.747	77.494	model.01	5	27.172	38.12	-8.586	17.172	60.322	1	8.05e-15	sig
Single_Model	TAG54:6-FA16:0	-2.26103	0.68388	-3.30619	0.000945754		Anova	model.00	4	85.494	94.252	-38.747	77.494	model.01	5	31.721	42.67	-10.861	21.721	55.772	1	8.14e-14	sig
Single_Model	TAG54:6-FA16:1	-1.41802	0.553712	-2.56094	0.0104389		Anova	model.00	4	85.494	94.252	-38.747	77.494	model.01	5	27.635	38.583	-8.818	17.635	59.859	1	1.02e-14	sig
Single_Model	TAG54:6-FA18:1	-1.34836	0.511733	-2.63489	0.00841643		Anova	model.00	4	85.494	94.252	-38.747	77.494	model.01	5	27.323	38.271	-8.661	17.323	60.171	1	8.7e-15	sig
Single_Model	TAG54:6-FA18:2	-1.54962	0.550787	-2.81346	0.00490117		Anova	model.00	4	85.494	94.252	-38.747	77.494	model.01	5	28.129	39.077	-9.065	18.129	59.365	1	1.31e-14	sig
Single_Model	TAG54:6-FA18:3	-1.34559	0.497472	-2.70485	0.00683355		Anova	model.00	4	85.494	94.252	-38.747	77.494	model.01	5	27.564	38.513	-8.782	17.564	59.929	1	9.83e-15	sig
Single_Model	TAG54:6-FA20:3	-1.46527	0.506799	-2.89122	0.00383747		Anova	model.00	4	85.494	94.252	-38.747	77.494	model.01	5	28.543	39.491	-9.272	18.543	58.951	1	1.62e-14	sig
Single_Model	TAG54:6-FA20:4	-1.61782	0.67387	-2.4008	0.0163595		Anova	model.00	4	85.494	94.252	-38.747	77.494	model.01	5	26.733	37.681	-8.367	16.733	60.761	1	6.45e-15	sig
Single_Model	TAG54:6-FA20:5	-1.53432	0.53725	-2.85588	0.00429176		Anova	model.00	4	85.494	94.252	-38.747	77.494	model.01	5	27.748	38.696	-8.874	17.748	59.746	1	1.08e-14	sig
Single_Model	TAG54:6-FA22:5	-1.18716	0.374089	-3.17345	0.00150636		Anova	model.00	4	85.494	94.252	-38.747	77.494	model.01	5	28.263	39.211	-9.131	18.263	59.231	1	1.4e-14	sig
Single_Model	TAG54:6-FA22:6	-1.49185	0.456094	-3.27092	0.00107197		Anova	model.00	4	85.494	94.252	-38.747	77.494	model.01	5	28.668	39.616	-9.334	18.668	58.826	1	1.72e-14	sig
Single_Model	TAG54:7-FA18:1	-1.44177	0.526448	-2.73868	0.00616869		Anova	model.00	4	85.494	94.252	-38.747	77.494	model.01	5	27.9	38.848	-8.95	17.9	59.594	1	1.17e-14	sig
Single_Model	TAG54:7-FA18:2	-1.42456	0.481833	-2.95655	0.003111		Anova	model.00	4	85.494	94.252	-38.747	77.494	model.01	5	28.675	39.623	-9.338	18.675	58.819	1	1.73e-14	sig
Single_Model	TAG54:7-FA18:3	-1.48007	0.532038	-2.78189	0.00540438		Anova	model.00	4	85.494	94.252	-38.747	77.494	model.01	5	27.594	38.542	-8.797	17.594	59.9	1	9.98e-15	sig
Single_Model	TAG54:7-FA20:4	-1.52733	0.579925	-2.63366	0.00844694		Anova	model.00	4	85.494	94.252	-38.747	77.494	model.01	5	27.906	38.854	-8.953	17.906	59.588	1	1.17e-14	sig
Single_Model	TAG54:7-FA20:5	-1.61928	0.594776	-2.7225	0.00647898		Anova	model.00	4	85.494	94.252	-38.747	77.494	model.01	5	27.397	38.345	-8.698	17.397	60.097	1	9.03e-15	sig
Single_Model	TAG54:7-FA22:6	-1.23456	0.41742	-2.95761	0.00310037		Anova	model.00	4	85.494	94.252	-38.747	77.494	model.01	5	28.543	39.491	-9.271	18.543	58.951	1	1.62e-14	sig
Single_Model	TAG55:1-FA16:0	-2.03923	0.672314	-3.03314	0.0024202		Anova	model.00	4	85.494	94.252	-38.747	77.494	model.01	5	27.791	38.74	-8.896	17.791	59.702	1	1.1e-14	sig
Single_Model	TAG55:1-FA18:1	-2.39821	0.94041	-2.55017	0.010767		Anova	model.00	4	85.494	94.252	-38.747	77.494	model.01	5	24.717	35.665	-7.358	14.717	62.777	1	2.32e-15	sig
Single_Model	TAG55:2-FA18:1	-1.95507	0.830081	-2.35528	0.0185086		Anova	model.00	4	85.494	94.252	-38.747	77.494	model.01	5	24.818	35.767	-7.409	14.818	62.676	1	2.44e-15	sig
Single_Model	TAG55:2-FA18:2	-2.04377	0.622084	-3.28537	0.0010185		Anova	model.00	4	85.494	94.252	-38.747	77.494	model.01	5	29.902	40.85	-9.951	19.902	57.592	1	3.23e-14	sig
Single_Model	TAG55:3-FA18:1	-1.39411	0.459229	-3.03577	0.00239923		Anova	model.00	4	85.494	94.252	-38.747	77.494	model.01	5	27.965	38.914	-8.983	17.965	59.529	1	1.21e-14	sig
Single_Model	TAG55:3-FA18:2	-2.02495	0.848543	-2.38639	0.0170148		Anova	model.00	4	85.494	94.252	-38.747	77.494	model.01	5	25.621	36.569	-7.81	15.621	61.873	1	3.66e-15	sig
Single_Model	TAG55:4-FA18:1	-1.28009	0.369289	-3.46636	0.000527561		Anova	model.00	4	85.494	94.252	-38.747	77.494	model.01	5	30.291	41.239	-10.146	20.291	57.203	1	3.93e-14	sig
Single_Model	TAG55:4-FA18:2	-1.61144	0.631939	-2.55	0.0107724		Anova	model.00	4	85.494	94.252	-38.747	77.494	model.01	5	26.816	37.765	-8.408	16.816	60.677	1	6.72e-15	sig
Single_Model	TAG55:5-FA18:1	-1.79646	0.531972	-3.37698	0.000732855		Anova	model.00	4	85.494	94.252	-38.747	77.494	model.01	5	29.161	40.11	-9.581	19.161	58.332	1	2.21e-14	sig
Single_Model	TAG55:5-FA18:2	-1.35722	0.400973	-3.38481	0.000712281		Anova	model.00	4	85.494	94.252	-38.747	77.494	model.01	5	31.124	42.072	-10.562	21.124	56.37	1	6e-14	sig
Single_Model	TAG55:5-FA20:4	-1.87753	0.674524	-2.78349	0.00537768		Anova	model.00	4	85.494	94.252	-38.747	77.494	model.01	5	26.711	37.659	-8.355	16.711	60.783	1	6.37e-15	sig
Single_Model	TAG55:7-FA22:6	-1.70865	0.545482	-3.13237	0.00173402		Anova	model.00	4	85.494	94.252	-38.747	77.494	model.01	5	29.743	40.691	-9.872	19.743	57.751	1	2.98e-14	sig
Single_Model	TAG56:10-FA18:2	-1.47537	0.456174	-3.23421	0.00121977		Anova	model.00	4	85.494	94.252	-38.747	77.494	model.01	5	30.089	41.038	-10.045	20.089	57.404	1	3.55e-14	sig
Single_Model	TAG56:1-FA16:0	-2.5073	0.858522	-2.92048	0.00349489		Anova	model.00	4	85.494	94.252	-38.747	77.494	model.01	5	38.857	49.805	-14.428	28.857	48.637	1	3.08e-12	sig
Single_Model	TAG56:1-FA18:1	-2.21227	0.70801	-3.12463	0.00178031		Anova	model.00	4	85.494	94.252	-38.747	77.494	model.01	5	32.796	43.744	-11.398	22.796	54.698	1	1.41e-13	sig
Single_Model	TAG56:2-FA16:0	-1.59355	0.478765	-3.32845	0.000873299		Anova	model.00	4	85.494	94.252	-38.747	77.494	model.01	5	35.487	46.436	-12.744	25.487	52.006	1	5.53e-13	sig
Single_Model	TAG56:2-FA18:0	-1.79663	0.622585	-2.88577	0.00390463		Anova	model.00	4	85.494	94.252	-38.747	77.494	model.01	5	28.024	38.972	-9.012	18.024	59.47	1	1.24e-14	sig
Single_Model	TAG56:2-FA20:0	-1.75105	0.54576	-3.20846	0.00133448		Anova	model.00	4	85.494	94.252	-38.747	77.494	model.01	5	28.801	39.75	-9.401	18.801	58.693	1	1.84e-14	sig
Single_Model	TAG56:2-FA20:1	-1.70924	0.651014	-2.62551	0.00865198		Anova	model.00	4	85.494	94.252	-38.747	77.494	model.01	5	26.948	37.896	-8.474	16.948	60.546	1	7.19e-15	sig
Single_Model	TAG56:3-FA16:0	-1.37091	0.388557	-3.52822	0.000418357		Anova	model.00	4	85.494	94.252	-38.747	77.494	model.01	5	33.153	44.102	-11.577	23.153	54.34	1	1.69e-13	sig
Single_Model	TAG56:3-FA18:0	-1.8232	0.603109	-3.023	0.00250282		Anova	model.00	4	85.494	94.252	-38.747	77.494	model.01	5	28.18	39.129	-9.09	18.18	59.314	1	1.34e-14	sig
Single_Model	TAG56:3-FA18:1	-1.55471	0.580242	-2.67941	0.00737511		Anova	model.00	4	85.494	94.252	-38.747	77.494	model.01	5	27.061	38.01	-8.531	17.061	60.432	1	7.62e-15	sig
Single_Model	TAG56:3-FA18:2	-1.73307	0.563488	-3.07561	0.00210073		Anova	model.00	4	85.494	94.252	-38.747	77.494	model.01	5	28.5	39.448	-9.25	18.5	58.994	1	1.58e-14	sig
Single_Model	TAG56:3-FA20:0	-1.73056	0.522434	-3.31249	0.000924708		Anova	model.00	4	85.494	94.252	-38.747	77.494	model.01	5	29.088	40.036	-9.544	19.088	58.406	1	2.13e-14	sig
Single_Model	TAG56:3-FA20:1	-1.48479	0.571277	-2.59907	0.00934769		Anova	model.00	4	85.494	94.252	-38.747	77.494	model.01	5	26.629	37.578	-8.315	16.629	60.864	1	6.11e-15	sig
Single_Model	TAG56:3-FA20:2	-1.58213	0.553686	-2.85745	0.00427062		Anova	model.00	4	85.494	94.252	-38.747	77.494	model.01	5	28.022	38.97	-9.011	18.022	59.472	1	1.24e-14	sig
Single_Model	TAG56:4-FA16:0	-1.79671	0.789469	-2.27584	0.0228553		Anova	model.00	4	85.494	94.252	-38.747	77.494	model.01	5	25.445	36.393	-7.723	15.445	62.049	1	3.35e-15	sig
Single_Model	TAG56:4-FA18:0	-1.98049	0.681792	-2.90482	0.00367461		Anova	model.00	4	85.494	94.252	-38.747	77.494	model.01	5	27.231	38.18	-8.616	17.231	60.262	1	8.3e-15	sig
Single_Model	TAG56:4-FA18:1	-1.48766	0.574133	-2.59115	0.00956569		Anova	model.00	4	85.494	94.252	-38.747	77.494	model.01	5	27.087	38.035	-8.543	17.087	60.407	1	7.71e-15	sig
Single_Model	TAG56:4-FA18:2	-1.46323	0.502075	-2.91436	0.0035642		Anova	model.00	4	85.494	94.252	-38.747	77.494	model.01	5	28.147	39.095	-9.073	18.147	59.347	1	1.32e-14	sig
Single_Model	TAG56:4-FA20:1	-1.46961	0.551888	-2.66287	0.0077477		Anova	model.00	4	85.494	94.252	-38.747	77.494	model.01	5	27.191	38.139	-8.595	17.191	60.303	1	8.13e-15	sig
Single_Model	TAG56:4-FA20:2	-1.48653	0.577451	-2.57429	0.0100446		Anova	model.00	4	85.494	94.252	-38.747	77.494	model.01	5	26.821	37.769	-8.41	16.821	60.673	1	6.74e-15	sig
Single_Model	TAG56:4-FA20:3	-1.82194	0.598133	-3.04605	0.00231868		Anova	model.00	4	85.494	94.252	-38.747	77.494	model.01	5	28.586	39.534	-9.293	18.586	58.908	1	1.65e-14	sig
Single_Model	TAG56:4-FA20:4	-2.45882	0.823331	-2.98643	0.00282256		Anova	model.00	4	85.494	94.252	-38.747	77.494	model.01	5	26.608	37.557	-8.304	16.608	60.886	1	6.05e-15	sig
Single_Model	TAG56:4-FA22:4	-1.73095	0.776612	-2.22885	0.0258237		Anova	model.00	4	85.494	94.252	-38.747	77.494	model.01	5	25.458	36.406	-7.729	15.458	62.036	1	3.37e-15	sig
Single_Model	TAG56:5-FA16:0	-1.66915	0.559526	-2.98316	0.0028529		Anova	model.00	4	85.494	94.252	-38.747	77.494	model.01	5	26.675	37.623	-8.337	16.675	60.819	1	6.26e-15	sig
Single_Model	TAG56:5-FA18:0	-2.18981	0.699064	-3.13248	0.00173334		Anova	model.00	4	85.494	94.252	-38.747	77.494	model.01	5	27.558	38.506	-8.779	17.558	59.936	1	9.8e-15	sig
Single_Model	TAG56:5-FA18:1	-1.66184	0.746801	-2.22527	0.026063		Anova	model.00	4	85.494	94.252	-38.747	77.494	model.01	5	25.847	36.795	-7.923	15.847	61.647	1	4.11e-15	sig
Single_Model	TAG56:5-FA18:2	-1.51301	0.514452	-2.94102	0.00327132		Anova	model.00	4	85.494	94.252	-38.747	77.494	model.01	5	28.474	39.422	-9.237	18.474	59.02	1	1.56e-14	sig
Single_Model	TAG56:5-FA20:1	-1.19427	0.33814	-3.53187	0.000412627		Anova	model.00	4	85.494	94.252	-38.747	77.494	model.01	5	32.056	43.004	-11.028	22.056	55.438	1	9.64e-14	sig
Single_Model	TAG56:5-FA20:2	-1.42276	0.492211	-2.89055	0.00384566		Anova	model.00	4	85.494	94.252	-38.747	77.494	model.01	5	28.258	39.207	-9.129	18.258	59.235	1	1.4e-14	sig
Single_Model	TAG56:5-FA20:3	-1.54137	0.536739	-2.87174	0.00408224		Anova	model.00	4	85.494	94.252	-38.747	77.494	model.01	5	27.943	38.891	-8.972	17.943	59.551	1	1.19e-14	sig
Single_Model	TAG56:5-FA20:4	-2.16304	0.943411	-2.29279	0.0218601		Anova	model.00	4	85.494	94.252	-38.747	77.494	model.01	5	24.859	35.807	-7.43	14.859	62.635	1	2.49e-15	sig
Single_Model	TAG56:5-FA22:4	-1.77166	0.977338	-1.81274	0.0698724		Anova	model.00	4	85.494	94.252	-38.747	77.494	model.01	5	24.044	34.993	-7.022	14.044	63.449	1	1.65e-15	nsig
Single_Model	TAG56:5-FA22:5	-1.7899	0.606818	-2.94965	0.00318138		Anova	model.00	4	85.494	94.252	-38.747	77.494	model.01	5	25.494	36.443	-7.747	15.494	61.999	1	3.44e-15	sig
Single_Model	TAG56:6-FA16:0	-2.15477	0.61219	-3.51977	0.000431922		Anova	model.00	4	85.494	94.252	-38.747	77.494	model.01	5	36.075	47.023	-13.037	26.075	51.419	1	7.46e-13	sig
Single_Model	TAG56:6-FA18:0	-1.83599	0.558527	-3.28719	0.00101192		Anova	model.00	4	85.494	94.252	-38.747	77.494	model.01	5	58.809	69.758	-24.405	48.809	28.685	1	8.52e-08	sig
Single_Model	TAG56:6-FA18:1	-1.54594	0.616858	-2.50616	0.0122052		Anova	model.00	4	85.494	94.252	-38.747	77.494	model.01	5	26.783	37.731	-8.392	16.783	60.711	1	6.61e-15	sig
Single_Model	TAG56:6-FA18:2	-1.57643	0.573549	-2.74855	0.00598588		Anova	model.00	4	85.494	94.252	-38.747	77.494	model.01	5	27.723	38.671	-8.861	17.723	59.771	1	1.07e-14	sig
Single_Model	TAG56:6-FA20:2	-1.31821	0.387428	-3.40247	0.000667788		Anova	model.00	4	85.494	94.252	-38.747	77.494	model.01	5	31.685	42.633	-10.843	21.685	55.809	1	7.99e-14	sig
Single_Model	TAG56:6-FA20:3	-1.60291	0.54109	-2.96237	0.00305285		Anova	model.00	4	85.494	94.252	-38.747	77.494	model.01	5	28.645	39.593	-9.323	18.645	58.849	1	1.7e-14	sig
Single_Model	TAG56:6-FA20:4	-1.85629	0.807453	-2.29894	0.0215083		Anova	model.00	4	85.494	94.252	-38.747	77.494	model.01	5	25.803	36.751	-7.902	15.803	61.691	1	4.02e-15	sig
Single_Model	TAG56:6-FA20:5	-1.88653	0.616766	-3.05875	0.00222261		Anova	model.00	4	85.494	94.252	-38.747	77.494	model.01	5	26.404	37.352	-8.202	16.404	61.09	1	5.45e-15	sig
Single_Model	TAG56:6-FA22:4	-1.36259	0.52258	-2.60743	0.0091225		Anova	model.00	4	85.494	94.252	-38.747	77.494	model.01	5	26.488	37.437	-8.244	16.488	61.005	1	5.69e-15	sig
Single_Model	TAG56:6-FA22:5	-1.32308	0.438485	-3.0174	0.00254957		Anova	model.00	4	85.494	94.252	-38.747	77.494	model.01	5	26.93	37.878	-8.465	16.93	60.564	1	7.12e-15	sig
Single_Model	TAG56:6-FA22:6	-1.59697	0.483324	-3.30414	0.000952679		Anova	model.00	4	85.494	94.252	-38.747	77.494	model.01	5	28.326	39.275	-9.163	18.326	59.167	1	1.45e-14	sig
Single_Model	TAG56:7-FA16:0	-1.61953	0.577456	-2.80459	0.00503812		Anova	model.00	4	85.494	94.252	-38.747	77.494	model.01	5	27.146	38.094	-8.573	17.146	60.348	1	7.95e-15	sig
Single_Model	TAG56:7-FA18:0	-2.98487	1.12374	-2.65619	0.00790299		Anova	model.00	4	85.494	94.252	-38.747	77.494	model.01	5	24.47	35.418	-7.235	14.47	63.024	1	2.04e-15	sig
Single_Model	TAG56:7-FA18:1	-1.75373	0.769211	-2.27991	0.0226133		Anova	model.00	4	85.494	94.252	-38.747	77.494	model.01	5	25.904	36.852	-7.952	15.904	61.59	1	4.23e-15	sig
Single_Model	TAG56:7-FA18:2	-1.59105	0.566859	-2.80678	0.00500399		Anova	model.00	4	85.494	94.252	-38.747	77.494	model.01	5	27.909	38.857	-8.954	17.909	59.585	1	1.17e-14	sig
Single_Model	TAG56:7-FA20:3	-1.76816	0.567567	-3.11534	0.00183733		Anova	model.00	4	85.494	94.252	-38.747	77.494	model.01	5	29.762	40.711	-9.881	19.762	57.731	1	3.01e-14	sig
Single_Model	TAG56:7-FA20:4	-1.81921	0.672592	-2.70477	0.00683508		Anova	model.00	4	85.494	94.252	-38.747	77.494	model.01	5	27.221	38.169	-8.611	17.221	60.273	1	8.26e-15	sig
Single_Model	TAG56:7-FA20:5	-1.77984	0.652813	-2.72642	0.00640255		Anova	model.00	4	85.494	94.252	-38.747	77.494	model.01	5	26.475	37.424	-8.238	16.475	61.019	1	5.65e-15	sig
Single_Model	TAG56:7-FA22:5	-1.27772	0.414363	-3.08358	0.00204529		Anova	model.00	4	85.494	94.252	-38.747	77.494	model.01	5	27.796	38.745	-8.898	17.796	59.697	1	1.11e-14	sig
Single_Model	TAG56:7-FA22:6	-1.42591	0.509717	-2.79746	0.00515059		Anova	model.00	4	85.494	94.252	-38.747	77.494	model.01	5	26.962	37.91	-8.481	16.962	60.532	1	7.24e-15	sig
Single_Model	TAG56:8-FA16:0	-2.04489	0.688477	-2.97017	0.00297637		Anova	model.00	4	85.494	94.252	-38.747	77.494	model.01	5	27.404	38.352	-8.702	17.404	60.09	1	9.06e-15	sig
Single_Model	TAG56:8-FA18:1	-2.1846	0.806882	-2.70745	0.00678012		Anova	model.00	4	85.494	94.252	-38.747	77.494	model.01	5	25.715	36.664	-7.858	15.715	61.779	1	3.84e-15	sig
Single_Model	TAG56:8-FA18:2	-1.63209	0.549976	-2.96756	0.00300173		Anova	model.00	4	85.494	94.252	-38.747	77.494	model.01	5	28.824	39.772	-9.412	18.824	58.67	1	1.87e-14	sig
Single_Model	TAG56:8-FA20:4	-2.53216	1.22992	-2.0588	0.0395138		Anova	model.00	4	85.494	94.252	-38.747	77.494	model.01	5	28.813	39.761	-9.406	18.813	58.681	1	1.85e-14	sig
Single_Model	TAG56:8-FA20:5	-1.62843	0.466668	-3.48949	0.000483938		Anova	model.00	4	85.494	94.252	-38.747	77.494	model.01	5	28.882	39.83	-9.441	18.882	58.612	1	1.92e-14	sig
Single_Model	TAG56:8-FA22:6	-1.34917	0.43201	-3.12302	0.00179007		Anova	model.00	4	85.494	94.252	-38.747	77.494	model.01	5	28.696	39.644	-9.348	18.696	58.798	1	1.75e-14	sig
Single_Model	TAG56:9-FA20:5	-1.85412	0.529573	-3.50115	0.000463247		Anova	model.00	4	85.494	94.252	-38.747	77.494	model.01	5	29.003	39.952	-9.502	19.003	58.49	1	2.04e-14	sig
Single_Model	TAG56:9-FA22:6	-1.5581	0.568688	-2.73981	0.00614741		Anova	model.00	4	85.494	94.252	-38.747	77.494	model.01	5	27.329	38.277	-8.665	17.329	60.165	1	8.72e-15	sig
Single_Model	TAG57:2-FA18:1	-3.33645	1.50053	-2.22352	0.0261808		Anova	model.00	4	85.494	94.252	-38.747	77.494	model.01	5	23.96	34.908	-6.98	13.96	63.534	1	1.58e-15	sig
Single_Model	TAG57:3-FA18:2	-2.56449	0.795396	-3.22417	0.0012634		Anova	model.00	4	85.494	94.252	-38.747	77.494	model.01	5	31.354	42.302	-10.677	21.354	56.14	1	6.75e-14	sig
Single_Model	TAG58:10-FA18:2	-2.3138	0.719454	-3.21604	0.00129971		Anova	model.00	4	85.494	94.252	-38.747	77.494	model.01	5	34.688	45.637	-12.344	24.688	52.805	1	3.68e-13	sig
Single_Model	TAG58:10-FA20:4	-2.39483	0.747569	-3.2035	0.0013577		Anova	model.00	4	85.494	94.252	-38.747	77.494	model.01	5	36.469	47.418	-13.235	26.469	51.025	1	9.12e-13	sig
Single_Model	TAG58:10-FA22:6	-1.76622	0.549863	-3.21211	0.00131766		Anova	model.00	4	85.494	94.252	-38.747	77.494	model.01	5	29.638	40.586	-9.819	19.638	57.856	1	2.82e-14	sig
Single_Model	TAG58:2-FA18:1	-2.43085	0.81568	-2.98015	0.00288104		Anova	model.00	4	85.494	94.252	-38.747	77.494	model.01	5	35.268	46.217	-12.634	25.268	52.225	1	4.95e-13	sig
Single_Model	TAG58:3-FA18:1	-1.71969	0.545892	-3.15024	0.00163138		Anova	model.00	4	85.494	94.252	-38.747	77.494	model.01	5	32.889	43.837	-11.445	22.889	54.605	1	1.47e-13	sig
Single_Model	TAG58:5-FA18:1	-1.72947	0.6704	-2.57976	0.00988686		Anova	model.00	4	85.494	94.252	-38.747	77.494	model.01	5	26.264	37.213	-8.132	16.264	61.23	1	5.08e-15	sig
Single_Model	TAG58:6-FA16:0	-0.564177	0.254381	-2.21784	0.0265656		Anova	model.00	4	85.494	94.252	-38.747	77.494	model.01	5	79.986	90.934	-34.993	69.986	7.5077	1	0.006144	sig
Single_Model	TAG58:6-FA18:0	-0.983198	0.354249	-2.77544	0.00551265		Anova	model.00	4	85.494	94.252	-38.747	77.494	model.01	5	73.528	84.476	-31.764	63.528	13.966	1	0.0001862	sig
Single_Model	TAG58:6-FA18:1	-1.77946	0.85224	-2.08798	0.0367994		Anova	model.00	4	85.494	94.252	-38.747	77.494	model.01	5	24.326	35.274	-7.163	14.326	63.168	1	1.9e-15	sig
Single_Model	TAG58:6-FA20:4	-2.37909	0.855493	-2.78096	0.00541985		Anova	model.00	4	85.494	94.252	-38.747	77.494	model.01	5	26.057	37.005	-8.029	16.057	61.437	1	4.57e-15	sig
Single_Model	TAG58:6-FA22:4	-1.62515	0.661736	-2.45589	0.0140536		Anova	model.00	4	85.494	94.252	-38.747	77.494	model.01	5	25.484	36.432	-7.742	15.484	62.01	1	3.42e-15	sig
Single_Model	TAG58:6-FA22:5	-1.78049	0.628453	-2.83313	0.00460944		Anova	model.00	4	85.494	94.252	-38.747	77.494	model.01	5	25.496	36.445	-7.748	15.496	61.998	1	3.44e-15	sig
Single_Model	TAG58:7-FA16:0	-2.18179	0.608363	-3.58633	0.000335365		Anova	model.00	4	85.494	94.252	-38.747	77.494	model.01	5	35.048	45.996	-12.524	25.048	52.446	1	4.42e-13	sig
Single_Model	TAG58:7-FA18:0	-2.47228	0.830788	-2.97582	0.00292204		Anova	model.00	4	85.494	94.252	-38.747	77.494	model.01	5	26.147	37.095	-8.074	16.147	61.347	1	4.79e-15	sig
Single_Model	TAG58:7-FA18:1	-1.73865	0.753895	-2.30622	0.0210985		Anova	model.00	4	85.494	94.252	-38.747	77.494	model.01	5	25.322	36.27	-7.661	15.322	62.172	1	3.15e-15	sig
Single_Model	TAG58:7-FA18:2	-1.63088	0.586717	-2.77967	0.00544136		Anova	model.00	4	85.494	94.252	-38.747	77.494	model.01	5	26.759	37.707	-8.379	16.759	60.735	1	6.53e-15	sig
Single_Model	TAG58:7-FA20:4	-2.66009	0.892164	-2.98162	0.00286728		Anova	model.00	4	85.494	94.252	-38.747	77.494	model.01	5	28.962	39.91	-9.481	18.962	58.532	1	2e-14	sig
Single_Model	TAG58:7-FA22:4	-1.59455	0.585723	-2.72236	0.00648183		Anova	model.00	4	85.494	94.252	-38.747	77.494	model.01	5	26.173	37.121	-8.087	16.173	61.321	1	4.85e-15	sig
Single_Model	TAG58:7-FA22:5	-1.38977	0.43805	-3.17263	0.00151066		Anova	model.00	4	85.494	94.252	-38.747	77.494	model.01	5	27.555	38.504	-8.778	17.555	59.938	1	9.79e-15	sig
Single_Model	TAG58:7-FA22:6	-1.73658	0.56515	-3.07277	0.00212081		Anova	model.00	4	85.494	94.252	-38.747	77.494	model.01	5	27.399	38.348	-8.7	17.399	60.094	1	9.04e-15	sig
Single_Model	TAG58:8-FA18:1	-1.95848	0.724432	-2.70347	0.00686191		Anova	model.00	4	85.494	94.252	-38.747	77.494	model.01	5	26.135	37.083	-8.068	16.135	61.359	1	4.76e-15	sig
Single_Model	TAG58:8-FA18:2	-1.77719	0.614276	-2.89314	0.0038141		Anova	model.00	4	85.494	94.252	-38.747	77.494	model.01	5	26.554	37.502	-8.277	16.554	60.94	1	5.89e-15	sig
Single_Model	TAG58:8-FA20:3	-1.6031	0.452523	-3.54259	0.000396214		Anova	model.00	4	85.494	94.252	-38.747	77.494	model.01	5	42.224	53.172	-16.112	32.224	45.27	1	1.72e-11	sig
Single_Model	TAG58:8-FA20:4	-2.761	0.878796	-3.1418	0.00167916		Anova	model.00	4	85.494	94.252	-38.747	77.494	model.01	5	30.931	41.879	-10.465	20.931	56.563	1	5.44e-14	sig
Single_Model	TAG58:8-FA22:5	-1.43554	0.435787	-3.29413	0.000987284		Anova	model.00	4	85.494	94.252	-38.747	77.494	model.01	5	28.45	39.398	-9.225	18.45	59.044	1	1.54e-14	sig
Single_Model	TAG58:8-FA22:6	-1.45964	0.443507	-3.29114	0.000997813		Anova	model.00	4	85.494	94.252	-38.747	77.494	model.01	5	28.349	39.297	-9.175	18.349	59.145	1	1.47e-14	sig
Single_Model	TAG58:9-FA18:1	-3.0724	1.29564	-2.37134	0.0177236		Anova	model.00	4	85.494	94.252	-38.747	77.494	model.01	5	23.904	34.852	-6.952	13.904	63.59	1	1.53e-15	sig
Single_Model	TAG58:9-FA18:2	-1.94264	0.569747	-3.40966	0.000650441		Anova	model.00	4	85.494	94.252	-38.747	77.494	model.01	5	29.88	40.829	-9.94	19.88	57.613	1	3.19e-14	sig
Single_Model	TAG58:9-FA20:4	-2.51601	0.825005	-3.04969	0.00229075		Anova	model.00	4	85.494	94.252	-38.747	77.494	model.01	5	33.298	44.246	-11.649	23.298	54.196	1	1.82e-13	sig
Single_Model	TAG58:9-FA22:5	-1.53397	0.465636	-3.29435	0.000986485		Anova	model.00	4	85.494	94.252	-38.747	77.494	model.01	5	29.144	40.093	-9.572	19.144	58.349	1	2.2e-14	sig
Single_Model	TAG58:9-FA22:6	-1.4781	0.42841	-3.4502	0.000560173		Anova	model.00	4	85.494	94.252	-38.747	77.494	model.01	5	29.994	40.943	-9.997	19.994	57.499	1	3.38e-14	sig

## Sheet: List_BD
Glmer_status	lipidSpecies	Estimate	Std.Error	zvalue	Pr(>|z|)		Glmer_Anova	Anova_model00	npar	AIC	BIC	logLik	deviance	Anova_model.01	npar	AIC	BIC	logLik	deviance	Chisq	Df	Pr(>Chisq)	Significant status considered	HMDB
Single_Model	CE(20:0)	1.06045	0.497976	2.12953	0.0332104		Anova	model.00	4	59.89	67.846	-25.945	51.89	model.01	5	56.255	66.2	-23.128	46.255	5.6348	1	0.01761	sig	HMDB06740
Single_Model	CE(22:2)	-1.56489	0.5789	-2.70321	0.00686732		Anova	model.00	4	59.89	67.846	-25.945	51.89	model.01	5	50.837	60.781	-20.418	40.837	11.053	1	0.0008852	sig	HMDB06737
Single_Model	CER(20:0)	-1.64243	0.762318	-2.15452	0.0311996		Anova	model.00	4	59.89	67.846	-25.945	51.89	model.01	5	56.615	66.56	-23.308	46.615	5.2749	1	0.02163	sig	HMDB04951
Single_Model	DAG(14:0/16:0)	-1.63539	0.733786	-2.2287	0.025834		Anova	model.00	4	59.89	67.846	-25.945	51.89	model.01	5	55.938	65.883	-22.969	45.938	5.9523	1	0.0147	sig	HMDB07095
Single_Model	DAG(14:0/18:2)	-1.52839	0.602098	-2.53845	0.0111346		Anova	model.00	4	59.89	67.846	-25.945	51.89	model.01	5	50.281	60.226	-20.141	40.281	11.609	1	0.0006564	sig	HMDB07016
Single_Model	DAG(16:0/16:1)	-1.65358	0.613115	-2.69702	0.00699637		Anova	model.00	4	59.89	67.846	-25.945	51.89	model.01	5	49.8	59.745	-19.9	39.8	12.09	1	0.0005069	sig	HMDB07099
Single_Model	DAG(16:0/18:1)	-4.2739	1.44064	-2.96666	0.00301054		Anova	model.00	4	59.89	67.846	-25.945	51.89	model.01	5	41.378	51.323	-15.689	31.378	20.512	1	5.925e-06	sig	HMDB07102
Single_Model	DAG(16:0/18:2)	-3.16768	1.16813	-2.71176	0.00669266		Anova	model.00	4	59.89	67.846	-25.945	51.89	model.01	5	46.296	56.241	-18.148	36.296	15.594	1	7.849e-05	sig	HMDB07103
Single_Model	DAG(16:0/22:5)	-1.48515	0.595338	-2.49464	0.0126086		Anova	model.00	4	59.89	67.846	-25.945	51.89	model.01	5	53.839	63.784	-21.919	43.839	8.0512	1	0.004547	sig	HMDB07120
Single_Model	DAG(18:0/18:1)	-4.7983	1.70768	-2.80983	0.00495675		Anova	model.00	4	59.89	67.846	-25.945	51.89	model.01	5	44.858	54.802	-17.429	34.858	17.032	1	3.675e-05	sig	HMDB07160
Single_Model	DAG(18:1/18:1)	-1.55844	0.706185	-2.20685	0.0273246		Anova	model.00	4	59.89	67.846	-25.945	51.89	model.01	5	54.007	63.952	-22.003	44.007	7.8831	1	0.00499	sig	HMDB07218
Single_Model	DAG(18:1/18:2)	-2.41758	0.917297	-2.63555	0.00840016		Anova	model.00	4	59.89	67.846	-25.945	51.89	model.01	5	47.145	57.09	-18.573	37.145	14.745	1	0.0001231	sig	HMDB07219
Single_Model	DAG(18:2/20:4)	-3.17163	0.915782	-3.4633	0.000533588		Anova	model.00	4	59.89	67.846	-25.945	51.89	model.01	5	36.112	46.057	-13.056	26.112	25.778	1	3.83e-07	sig	HMDB07257
Single_Model	FFA(15:0)	1.31574	0.624533	2.10677	0.035138		Anova	model.00	4	59.89	67.846	-25.945	51.89	model.01	5	55.782	65.727	-22.891	45.782	6.1075	1	0.01346	sig	HMDB00826
Single_Model	FFA(18:0)	1.54337	0.626087	2.4651	0.0136975		Anova	model.00	4	59.89	67.846	-25.945	51.89	model.01	5	51.979	61.924	-20.989	41.979	9.9114	1	0.001643	sig	HMDB00827
Single_Model	FFA(18:4)	1.41374	0.481844	2.93403	0.00334596		Anova	model.00	4	59.89	67.846	-25.945	51.89	model.01	5	48.006	57.951	-19.003	38.006	13.884	1	0.0001945	sig	HMDB06547
Single_Model	FFA(20:0)	1.22984	0.51093	2.40707	0.0160813		Anova	model.00	4	59.89	67.846	-25.945	51.89	model.01	5	53.134	63.079	-21.567	43.134	8.7564	1	0.003085	sig	HMDB02212
Single_Model	LCER(24:1)	-2.00711	0.782008	-2.56661	0.0102698		Anova	model.00	4	59.89	67.846	-25.945	51.89	model.01	5	50.309	60.254	-20.154	40.309	11.581	1	0.0006662	sig	HMDB04872
Single_Model	LPC(16:0)	-2.34486	0.92307	-2.54028	0.0110764		Anova	model.00	4	59.89	67.846	-25.945	51.89	model.01	5	53.336	63.28	-21.668	43.336	8.5544	1	0.003447	sig	HMDB10382
Single_Model	LPC(17:0)	-1.47814	0.732727	-2.01732	0.0436625		Anova	model.00	4	59.89	67.846	-25.945	51.89	model.01	5	56.625	66.569	-23.312	46.625	5.2654	1	0.02175	sig
Single_Model	LPC(18:0)	-2.85284	1.02712	-2.77752	0.00547746		Anova	model.00	4	59.89	67.846	-25.945	51.89	model.01	5	50.183	60.128	-20.091	40.183	11.707	1	0.0006226	sig	HMDB10384
Single_Model	LPE(16:0)	-1.97361	0.809383	-2.43841	0.0147519		Anova	model.00	4	59.89	67.846	-25.945	51.89	model.01	5	53.532	63.477	-21.766	43.532	8.3582	1	0.003839	sig	HMDB11503
Single_Model	LPE(18:0)	-1.89423	0.775679	-2.44202	0.0146051		Anova	model.00	4	59.89	67.846	-25.945	51.89	model.01	5	54.108	64.053	-22.054	44.108	7.782	1	0.005277	sig	HMDB11130
Single_Model	PC(16:0/16:0)	2.50639	1.16254	2.15596	0.0310867		Anova	model.00	4	59.89	67.846	-25.945	51.89	model.01	5	56.444	66.389	-23.222	46.444	5.4463	1	0.01961	sig	HMDB00564
Single_Model	PC(16:0/20:4)	-3.30281	1.4076	-2.34642	0.0189548		Anova	model.00	4	59.89	67.846	-25.945	51.89	model.01	5	54.444	64.389	-22.222	44.444	7.4459	1	0.006358	sig	HMDB07982
Single_Model	PC(16:0/22:4)	-2.17507	1.04677	-2.07788	0.0377206		Anova	model.00	4	59.89	67.846	-25.945	51.89	model.01	5	55.656	65.601	-22.828	45.656	6.234	1	0.01253	sig	HMDB07988
Single_Model	PC(18:0/18:0)	3.24484	1.31497	2.46762	0.0136014		Anova	model.00	4	59.89	67.846	-25.945	51.89	model.01	5	51.975	61.92	-20.988	41.975	9.9145	1	0.00164	sig	HMDB08036
Single_Model	PC(18:0/22:4)	-1.47349	0.751582	-1.96052	0.0499354		Anova	model.00	4	59.89	67.846	-25.945	51.89	model.01	5	55.681	65.626	-22.84	45.681	6.2092	1	0.01271	sig	HMDB08054
Single_Model	PC(18:2/20:4)	-3.42846	1.53851	-2.22843	0.0258518		Anova	model.00	4	59.89	67.846	-25.945	51.89	model.01	5	54.512	64.457	-22.256	44.512	7.3781	1	0.006602	sig	HMDB08147
Single_Model	PE(16:0/18:1)	-1.86786	0.863163	-2.16397	0.0304668		Anova	model.00	4	59.89	67.846	-25.945	51.89	model.01	5	56.312	66.257	-23.156	46.312	5.578	1	0.01819	sig	HMDB08927
Single_Model	PE(18:0/18:0)	-2.03289	0.879625	-2.31108	0.0208283		Anova	model.00	4	59.89	67.846	-25.945	51.89	model.01	5	54.212	64.157	-22.106	44.212	7.6778	1	0.00559	sig	HMDB08991
Single_Model	PE(O-16:0/20:4)	-1.5446	0.780541	-1.97888	0.0478294		Anova	model.00	4	59.89	67.846	-25.945	51.89	model.01	5	56.829	66.774	-23.415	46.829	5.0608	1	0.02447	sig
Single_Model	PE(O-18:0/18:1)	-2.86196	0.981566	-2.91571	0.00354878		Anova	model.00	4	59.89	67.846	-25.945	51.89	model.01	5	47.315	57.26	-18.658	37.315	14.575	1	0.0001347	sig
Single_Model	PE(O-18:0/18:2)	-3.20712	1.07936	-2.97132	0.00296519		Anova	model.00	4	59.89	67.846	-25.945	51.89	model.01	5	47.372	57.317	-18.686	37.372	14.518	1	0.0001389	sig
Single_Model	PE(P-16:0/18:2)	-2.41563	0.869049	-2.77963	0.00544211		Anova	model.00	4	59.89	67.846	-25.945	51.89	model.01	5	50.079	60.024	-20.04	40.079	11.811	1	0.0005889	sig	HMDB11343
Single_Model	PE(P-16:0/22:4)	-1.90309	0.789805	-2.40957	0.0159715		Anova	model.00	4	59.89	67.846	-25.945	51.89	model.01	5	53.955	63.9	-21.978	43.955	7.9348	1	0.004849	sig	HMDB11358
Single_Model	PE(P-18:0/16:0)	-2.94037	1.12975	-2.60266	0.00925036		Anova	model.00	4	59.89	67.846	-25.945	51.89	model.01	5	51.146	61.091	-20.573	41.146	10.744	1	0.001046	sig	HMDB11371
Single_Model	PE(P-18:0/18:1)	-1.46143	0.661109	-2.21058	0.0270652		Anova	model.00	4	59.89	67.846	-25.945	51.89	model.01	5	55.549	65.493	-22.774	45.549	6.3414	1	0.01179	sig	HMDB11375
Single_Model	PE(P-18:0/18:2)	-2.99197	0.948353	-3.15491	0.00160546		Anova	model.00	4	59.89	67.846	-25.945	51.89	model.01	5	42.846	52.791	-16.423	32.846	19.044	1	1.278e-05	sig	HMDB11376
Single_Model	PE(P-18:0/20:4)	-1.77919	0.839759	-2.11869	0.0341168		Anova	model.00	4	59.89	67.846	-25.945	51.89	model.01	5	55.61	65.555	-22.805	45.61	6.28	1	0.01221	sig	HMDB11386
Single_Model	PE(P-18:0/22:4)	-2.27523	1.04146	-2.18467	0.0289133		Anova	model.00	4	59.89	67.846	-25.945	51.89	model.01	5	52.436	62.381	-21.218	42.436	9.4544	1	0.002106	sig	HMDB11391
Single_Model	PE(P-18:1/18:2)	-1.77832	0.773401	-2.29935	0.0214849		Anova	model.00	4	59.89	67.846	-25.945	51.89	model.01	5	54.45	64.395	-22.225	44.45	7.4398	1	0.00638	sig	HMDB11442
Single_Model	PE(P-18:1/20:4)	-2.41698	1.07686	-2.24446	0.0248025		Anova	model.00	4	59.89	67.846	-25.945	51.89	model.01	5	53.922	63.867	-21.961	43.922	7.9681	1	0.004761	sig	HMDB11451
Single_Model	SM(18:0)	-5.21082	1.84054	-2.83114	0.00463825		Anova	model.00	4	59.89	67.846	-25.945	51.89	model.01	5	40.513	50.458	-15.257	30.513	21.377	1	3.773e-06	sig	HMDB01348
Single_Model	SM(18:1)	-5.64684	0.0122691	-460.25	0		Anova	model.00	4	59.89	67.846	-25.945	51.89	model.01	5	48.008	57.953	-19.004	38.008	13.882	1	0.0001946	sig	HMDB12101
Single_Model	SM(24:0)	2.64482	1.29634	2.04023	0.0413279		Anova	model.00	4	59.89	67.846	-25.945	51.89	model.01	5	56.868	66.812	-23.434	46.868	5.0225	1	0.02502	sig	HMDB11697
Single_Model	SM(24:1)	-7.19261	2.73613	-2.62875	0.00856993		Anova	model.00	4	59.89	67.846	-25.945	51.89	model.01	5	48.28	58.225	-19.14	38.28	13.61	1	0.0002249	sig	HMDB12107
Single_Model	SM(26:0)	6.66448	2.17196	3.06841	0.00215202		Anova	model.00	4	59.89	67.846	-25.945	51.89	model.01	5	47.808	57.753	-18.904	37.808	14.082	1	0.000175	sig	HMDB11698
Single_Model	TAG44:0-FA18:0	0.75956	0.332045	2.28752	0.0221655		Anova	model.00	4	59.89	67.846	-25.945	51.89	model.01	5	54.79	64.735	-22.395	44.79	7.0998	1	0.007709	sig
Single_Model	TAG47:2-FA16:1	0.632197	0.311792	2.02762	0.0425986		Anova	model.00	4	59.89	67.846	-25.945	51.89	model.01	5	56.607	66.552	-23.303	46.607	5.2831	1	0.02153	sig
Single_Model	TAG52:0-FA20:0	-0.99855	0.446931	-2.23424	0.0254673		Anova	model.00	4	59.89	67.846	-25.945	51.89	model.01	5	54.945	64.89	-22.473	44.945	6.9448	1	0.008406	sig
Single_Model	TAG54:6-FA16:0	0.973275	0.303751	3.20419	0.00135442		Anova	model.00	4	59.89	67.846	-25.945	51.89	model.01	5	45.305	55.25	-17.653	35.305	16.585	1	4.652e-05	sig
Single_Model	TAG55:1-FA16:0	-1.26718	0.564775	-2.24369	0.0248523		Anova	model.00	4	59.89	67.846	-25.945	51.89	model.01	5	56.655	66.6	-23.328	46.655	5.2347	1	0.02214	sig
Single_Model	TAG56:5-FA16:0	0.667402	0.290102	2.30058	0.0214153		Anova	model.00	4	59.89	67.846	-25.945	51.89	model.01	5	54.693	64.638	-22.346	44.693	7.1971	1	0.007302	sig
Single_Model	TAG56:5-FA18:0	0.964022	0.423849	2.27445	0.0229391		Anova	model.00	4	59.89	67.846	-25.945	51.89	model.01	5	54.193	64.138	-22.097	44.193	7.6965	1	0.005533	sig
Single_Model	TAG56:6-FA16:0	0.880947	0.260752	3.37849	0.00072884		Anova	model.00	4	59.89	67.846	-25.945	51.89	model.01	5	41.398	51.343	-15.699	31.398	20.492	1	5.988e-06	sig
Single_Model	TAG56:6-FA18:0	1.2497	0.379482	3.29318	0.000990602		Anova	model.00	4	59.89	67.846	-25.945	51.89	model.01	5	35.137	45.082	-12.569	25.137	26.753	1	2.31e-07	sig
Single_Model	TAG58:6-FA16:0	0.901961	0.270365	3.33609	0.000849666		Anova	model.00	4	59.89	67.846	-25.945	51.89	model.01	5	36.997	46.942	-13.499	26.997	24.893	1	6.06e-07	sig
Single_Model	TAG58:6-FA18:0	1.10063	0.333935	3.29593	0.000980978		Anova	model.00	4	59.89	67.846	-25.945	51.89	model.01	5	31.467	41.412	-10.733	21.467	30.423	1	3.47e-08	sig
Single_Model	TAG58:7-FA16:0	-1.17724	0.553256	-2.12784	0.0333502		Anova	model.00	4	59.89	67.846	-25.945	51.89	model.01	5	55.974	65.919	-22.987	45.974	5.9162	1	0.015	sig
Single_Model	CE(20:1)	0.329459	0.435483	0.756537	0.449327		Anova	model.00	4	59.89	67.846	-25.945	51.89	model.01	5	61.324	71.269	-25.662	51.324	0.5662	1	0.4518	nsig	HMDB05193
Single_Model	CE(20:3)	-0.752876	0.446307	-1.6869	0.0916223		Anova	model.00	4	59.89	67.846	-25.945	51.89	model.01	5	58.591	68.536	-24.296	48.591	3.2989	1	0.06932	nsig	HMDB06736
Single_Model	CE(20:4)	-0.424308	0.40985	-1.03528	0.30054		Anova	model.00	4	59.89	67.846	-25.945	51.89	model.01	5	60.756	70.701	-25.378	50.756	1.134	1	0.2869	nsig	HMDB06726
Single_Model	CE(20:5)	-0.164665	0.37737	-0.436347	0.662585		Anova	model.00	4	59.89	67.846	-25.945	51.89	model.01	5	61.699	71.644	-25.85	51.699	0.1908	1	0.6623	nsig	HMDB06731
Single_Model	CE(22:1)	-0.0176805	0.461484	-0.0383123	0.969439		Anova	model.00	4	59.89	67.846	-25.945	51.89	model.01	5	61.889	71.833	-25.944	51.889	0.0015	1	0.9694	nsig	HMDB10372
Single_Model	CE(24:0)	-0.568222	0.485246	-1.171	0.2416		Anova	model.00	4	59.89	67.846	-25.945	51.89	model.01	5	60.397	70.342	-25.199	50.397	1.4928	1	0.2218	nsig	HMDB10376
Single_Model	CER(22:0)	-0.355446	0.694265	-0.511974	0.608669		Anova	model.00	4	59.89	67.846	-25.945	51.89	model.01	5	61.631	71.576	-25.815	51.631	0.2591	1	0.6107	nsig	HMDB04952
Single_Model	DAG(14:0/18:1)	-0.697999	0.461387	-1.51283	0.130324		Anova	model.00	4	59.89	67.846	-25.945	51.89	model.01	5	59.376	69.321	-24.688	49.376	2.5142	1	0.1128	nsig	HMDB07015
Single_Model	DAG(16:0/16:0)	0.148861	0.763422	0.194992	0.845399		Anova	model.00	4	59.89	67.846	-25.945	51.89	model.01	5	61.852	71.797	-25.926	51.852	0.0383	1	0.8447	nsig	HMDB07098
Single_Model	DAG(16:0/18:0)	-0.0379705	0.645318	-0.05884	0.95308		Anova	model.00	4	59.89	67.846	-25.945	51.89	model.01	5	61.887	71.831	-25.943	51.887	0.0035	1	0.9531	nsig	HMDB07100
Single_Model	DAG(16:0/18:3)	-0.302887	0.525435	-0.576449	0.564311		Anova	model.00	4	59.89	67.846	-25.945	51.89	model.01	5	61.554	71.499	-25.777	51.554	0.3359	1	0.5622	nsig	HMDB07105
Single_Model	DAG(16:1/18:1)	-0.642841	0.409318	-1.57052	0.116295		Anova	model.00	4	59.89	67.846	-25.945	51.89	model.01	5	59.047	68.992	-24.524	49.047	2.8426	1	0.0918	nsig	HMDB07131
Single_Model	DAG(16:1/18:2)	-0.872607	0.464938	-1.87683	0.0605419		Anova	model.00	4	59.89	67.846	-25.945	51.89	model.01	5	56.824	66.769	-23.412	46.824	5.0659	1	0.0244	nsig	HMDB07132
Single_Model	DAG(20:0/20:0)	0.153963	0.451382	0.341092	0.733034		Anova	model.00	4	59.89	67.846	-25.945	51.89	model.01	5	61.774	71.719	-25.887	51.774	0.1159	1	0.7336	nsig	HMDB07368
Single_Model	FFA(14:0)	0.986585	0.543968	1.81368	0.0697266		Anova	model.00	4	59.89	67.846	-25.945	51.89	model.01	5	57.813	67.758	-23.906	47.813	4.0771	1	0.04347	nsig	HMDB00806
Single_Model	FFA(16:0)	0.924319	0.56184	1.64516	0.0999358		Anova	model.00	4	59.89	67.846	-25.945	51.89	model.01	5	58.612	68.557	-24.306	48.612	3.2782	1	0.0702	nsig	HMDB00220
Single_Model	FFA(16:1)	0.597377	0.50135	1.19154	0.233442		Anova	model.00	4	59.89	67.846	-25.945	51.89	model.01	5	60.45	70.395	-25.225	50.45	1.4396	1	0.2302	nsig	HMDB03229
Single_Model	FFA(17:0)	0.993138	0.575294	1.72631	0.0842908		Anova	model.00	4	59.89	67.846	-25.945	51.89	model.01	5	58.146	68.091	-24.073	48.146	3.7437	1	0.05301	nsig	HMDB02259
Single_Model	FFA(18:1)	0.828939	0.519741	1.59491	0.110733		Anova	model.00	4	59.89	67.846	-25.945	51.89	model.01	5	59.247	69.192	-24.623	49.247	2.6431	1	0.104	nsig	HMDB00207
Single_Model	FFA(18:2)	-0.198268	0.587958	-0.337215	0.735955		Anova	model.00	4	59.89	67.846	-25.945	51.89	model.01	5	61.77	71.715	-25.885	51.77	0.1198	1	0.7293	nsig	HMDB00673
Single_Model	FFA(18:3)	1.19399	0.646894	1.84573	0.0649321		Anova	model.00	4	59.89	67.846	-25.945	51.89	model.01	5	57.836	67.781	-23.918	47.836	4.0537	1	0.04407	nsig	HMDB01388
Single_Model	FFA(22:0)	0.632225	0.462034	1.36835	0.171203		Anova	model.00	4	59.89	67.846	-25.945	51.89	model.01	5	59.77	69.715	-24.885	49.77	2.1196	1	0.1454	nsig	HMDB00944
Single_Model	FFA(22:4)	0.0221321	0.43606	0.0507547	0.959521		Anova	model.00	4	59.89	67.846	-25.945	51.89	model.01	5	61.887	71.832	-25.944	51.887	0.0026	1	0.9596	nsig	HMDB02226
Single_Model	HCER(18:0)	-1.27807	0.84838	-1.50648	0.131943		Anova	model.00	4	59.89	67.846	-25.945	51.89	model.01	5	57.072	67.016	-23.536	47.072	4.8185	1	0.02816	nsig	HMDB04972
Single_Model	HCER(20:0)	-0.9012	0.566958	-1.58954	0.111939		Anova	model.00	4	59.89	67.846	-25.945	51.89	model.01	5	59.343	69.288	-24.672	49.343	2.5469	1	0.1105	nsig	HMDB04973
Single_Model	LPC(15:0)	-0.619268	0.512525	-1.20827	0.226944		Anova	model.00	4	59.89	67.846	-25.945	51.89	model.01	5	60.294	70.239	-25.147	50.294	1.5962	1	0.2064	nsig	HMDB10381
Single_Model	LPC(16:1)	-0.0781204	0.606965	-0.128707	0.89759		Anova	model.00	4	59.89	67.846	-25.945	51.89	model.01	5	61.873	71.818	-25.937	51.873	0.0166	1	0.8975	nsig	HMDB10383
Single_Model	LPC(18:1)	-0.867332	0.837159	-1.03604	0.300183		Anova	model.00	4	59.89	67.846	-25.945	51.89	model.01	5	60.767	70.712	-25.384	50.767	1.123	1	0.2893	nsig
Single_Model	LPC(18:2)	-0.934417	0.849844	-1.09952	0.271543		Anova	model.00	4	59.89	67.846	-25.945	51.89	model.01	5	60.583	70.528	-25.291	50.583	1.3072	1	0.2529	nsig
Single_Model	LPC(20:3)	0.243206	0.688139	0.353426	0.723769		Anova	model.00	4	59.89	67.846	-25.945	51.89	model.01	5	61.767	71.711	-25.883	51.767	0.1235	1	0.7253	nsig	HMDB10394
Single_Model	LPC(20:4)	0.825882	0.858767	0.961707	0.336197		Anova	model.00	4	59.89	67.846	-25.945	51.89	model.01	5	60.92	70.864	-25.46	50.92	0.9705	1	0.3246	nsig	HMDB10395
Single_Model	LPE(18:1)	-1.96864	1.0932	-1.8008	0.071735		Anova	model.00	4	59.89	67.846	-25.945	51.89	model.01	5	57.972	67.917	-23.986	47.972	3.9181	1	0.04777	nsig	HMDB11476
Single_Model	LPE(18:2)	0.142614	0.712668	0.200113	0.841392		Anova	model.00	4	59.89	67.846	-25.945	51.89	model.01	5	61.85	71.795	-25.925	51.85	0.0399	1	0.8416	nsig	HMDB11477
Single_Model	LPE(20:3)	0.438686	0.651763	0.673076	0.500899		Anova	model.00	4	59.89	67.846	-25.945	51.89	model.01	5	61.443	71.388	-25.721	51.443	0.4472	1	0.5037	nsig	HMDB11486
Single_Model	LPE(20:4)	0.256466	0.649328	0.394971	0.692864		Anova	model.00	4	59.89	67.846	-25.945	51.89	model.01	5	61.734	71.678	-25.867	51.734	0.1564	1	0.6925	nsig	HMDB11487
Single_Model	PC(16:0/14:0)	-0.741204	0.470812	-1.57431	0.115416		Anova	model.00	4	59.89	67.846	-25.945	51.89	model.01	5	59.234	69.179	-24.617	49.234	2.6563	1	0.1031	nsig	HMDB07965
Single_Model	PC(16:0/16:1)	-0.696045	0.49807	-1.39748	0.162268		Anova	model.00	4	59.89	67.846	-25.945	51.89	model.01	5	59.847	69.792	-24.924	49.847	2.043	1	0.1529	nsig	HMDB07969
Single_Model	PC(16:0/18:1)	-0.345766	0.935531	-0.369594	0.711685		Anova	model.00	4	59.89	67.846	-25.945	51.89	model.01	5	61.753	71.698	-25.876	51.753	0.1374	1	0.7109	nsig	HMDB07972
Single_Model	PC(16:0/18:3)	-0.9255	0.707437	-1.30824	0.19079		Anova	model.00	4	59.89	67.846	-25.945	51.89	model.01	5	60.132	70.077	-25.066	50.132	1.7582	1	0.1848	nsig	HMDB07975
Single_Model	PC(16:0/20:1)	-0.201608	0.66644	-0.302515	0.76226		Anova	model.00	4	59.89	67.846	-25.945	51.89	model.01	5	61.794	71.739	-25.897	51.794	0.0956	1	0.7572	nsig	HMDB07978
Single_Model	PC(16:0/20:2)	-0.807758	0.828616	-0.974828	0.329646		Anova	model.00	4	59.89	67.846	-25.945	51.89	model.01	5	60.91	70.855	-25.455	50.91	0.9804	1	0.3221	nsig	HMDB07979
Single_Model	PC(16:0/20:3)	-0.267852	0.724995	-0.369454	0.711789		Anova	model.00	4	59.89	67.846	-25.945	51.89	model.01	5	61.754	71.699	-25.877	51.754	0.1358	1	0.7125	nsig	HMDB07981
Single_Model	PC(16:0/20:5)	-0.195801	0.308306	-0.635085	0.525373		Anova	model.00	4	59.89	67.846	-25.945	51.89	model.01	5	61.465	71.41	-25.733	51.465	0.4249	1	0.5145	nsig	HMDB07984
Single_Model	PC(16:0/22:5)	-1.24348	0.811931	-1.53151	0.125643		Anova	model.00	4	59.89	67.846	-25.945	51.89	model.01	5	59.284	69.229	-24.642	49.284	2.6058	1	0.1065	nsig	HMDB07990
Single_Model	PC(16:0/22:6)	-2.34753	1.45511	-1.6133	0.106679		Anova	model.00	4	59.89	67.846	-25.945	51.89	model.01	5	55.79	65.735	-22.895	45.79	6.0996	1	0.01352	nsig	HMDB07991
Single_Model	PC(17:0/18:1)	-0.0117881	0.627778	-0.0187775	0.985019		Anova	model.00	4	59.89	67.846	-25.945	51.89	model.01	5	61.89	71.835	-25.945	51.89	0.0004	1	0.985	nsig
Single_Model	PC(17:0/18:2)	-0.468706	0.76479	-0.612856	0.539971		Anova	model.00	4	59.89	67.846	-25.945	51.89	model.01	5	61.482	71.427	-25.741	51.482	0.4082	1	0.5229	nsig
Single_Model	PC(17:0/20:4)	-0.284704	0.300895	-0.946191	0.344051		Anova	model.00	4	59.89	67.846	-25.945	51.89	model.01	5	60.9	70.845	-25.45	50.9	0.9896	1	0.3198	nsig
Single_Model	PC(18:0/16:1)	0.341154	0.508484	0.670924	0.502269		Anova	model.00	4	59.89	67.846	-25.945	51.89	model.01	5	61.422	71.367	-25.711	51.422	0.4679	1	0.494	nsig	HMDB08035
Single_Model	PC(18:0/18:1)	0.032923	0.689678	0.0477368	0.961926		Anova	model.00	4	59.89	67.846	-25.945	51.89	model.01	5	61.888	71.833	-25.944	51.888	0.0023	1	0.9619	nsig	HMDB08038
Single_Model	PC(18:0/18:2)	-0.696966	0.827109	-0.842652	0.399423		Anova	model.00	4	59.89	67.846	-25.945	51.89	model.01	5	61.16	71.105	-25.58	51.16	0.7298	1	0.393	nsig	HMDB08039
Single_Model	PC(18:0/18:3)	-0.709309	0.550969	-1.28738	0.197961		Anova	model.00	4	59.89	67.846	-25.945	51.89	model.01	5	60.007	69.951	-25.003	50.007	1.8834	1	0.1699	nsig	HMDB08040
Single_Model	PC(18:0/20:2)	-0.0905317	0.507924	-0.178239	0.858535		Anova	model.00	4	59.89	67.846	-25.945	51.89	model.01	5	61.858	71.802	-25.929	51.858	0.0324	1	0.8571	nsig	HMDB08045
Single_Model	PC(18:0/20:3)	0.421761	0.654963	0.643947	0.51961		Anova	model.00	4	59.89	67.846	-25.945	51.89	model.01	5	61.461	71.406	-25.731	51.461	0.4286	1	0.5127	nsig	HMDB08047
Single_Model	PC(18:0/20:4)	-1.72901	1.13456	-1.52394	0.127523		Anova	model.00	4	59.89	67.846	-25.945	51.89	model.01	5	59.397	69.342	-24.698	49.397	2.4934	1	0.1143	nsig	HMDB08048
Single_Model	PC(18:0/22:5)	-0.762871	0.532251	-1.43329	0.151775		Anova	model.00	4	59.89	67.846	-25.945	51.89	model.01	5	59.42	69.365	-24.71	49.42	2.4703	1	0.116	nsig	HMDB08056
Single_Model	PC(18:1/16:1)	-0.234405	0.565454	-0.414543	0.678476		Anova	model.00	4	59.89	67.846	-25.945	51.89	model.01	5	61.719	71.664	-25.859	51.719	0.1712	1	0.679	nsig	HMDB08101
Single_Model	PC(18:1/18:1)	0.107473	0.698694	0.15382	0.877751		Anova	model.00	4	59.89	67.846	-25.945	51.89	model.01	5	61.866	71.811	-25.933	51.866	0.0237	1	0.8777	nsig	HMDB00593
Single_Model	PC(18:1/18:2)	-2.27833	1.3828	-1.64762	0.0994305		Anova	model.00	4	59.89	67.846	-25.945	51.89	model.01	5	57.883	67.828	-23.942	47.883	4.007	1	0.04531	nsig	HMDB08105
Single_Model	PC(18:1/18:3)	-0.44299	0.462528	-0.957758	0.338185		Anova	model.00	4	59.89	67.846	-25.945	51.89	model.01	5	60.917	70.862	-25.458	50.917	0.9734	1	0.3238	nsig	HMDB08107
Single_Model	PC(18:1/20:2)	0.437385	0.592424	0.738296	0.460334		Anova	model.00	4	59.89	67.846	-25.945	51.89	model.01	5	61.351	71.296	-25.675	51.351	0.5392	1	0.4628	nsig	HMDB08111
Single_Model	PC(18:1/20:3)	0.0667153	0.623653	0.106975	0.914809		Anova	model.00	4	59.89	67.846	-25.945	51.89	model.01	5	61.879	71.823	-25.939	51.879	0.0115	1	0.9147	nsig	HMDB08113
Single_Model	PC(18:1/20:4)	-1.81161	1.3398	-1.35214	0.176329		Anova	model.00	4	59.89	67.846	-25.945	51.89	model.01	5	60.097	70.041	-25.048	50.097	1.7935	1	0.1805	nsig	HMDB08114
Single_Model	PC(18:1/22:6)	-0.446785	0.363568	-1.22889	0.219113		Anova	model.00	4	59.89	67.846	-25.945	51.89	model.01	5	60.097	70.042	-25.049	50.097	1.793	1	0.1806	nsig	HMDB08123
Single_Model	PC(18:2/16:1)	-0.367971	0.818421	-0.449611	0.652991		Anova	model.00	4	59.89	67.846	-25.945	51.89	model.01	5	61.685	71.63	-25.843	51.685	0.2046	1	0.651	nsig	HMDB08134
Single_Model	PC(18:2/20:1)	-0.736923	0.691029	-1.06641	0.286237		Anova	model.00	4	59.89	67.846	-25.945	51.89	model.01	5	60.571	70.516	-25.286	50.571	1.3187	1	0.2508	nsig	HMDB08144
Single_Model	PC(18:2/20:2)	-1.25897	0.833164	-1.51107	0.130771		Anova	model.00	4	59.89	67.846	-25.945	51.89	model.01	5	59.221	69.166	-24.611	49.221	2.6685	1	0.1024	nsig	HMDB08145
Single_Model	PC(18:2/20:3)	-0.654893	0.802104	-0.816468	0.414232		Anova	model.00	4	59.89	67.846	-25.945	51.89	model.01	5	61.115	71.06	-25.558	51.115	0.7751	1	0.3787	nsig	HMDB08146
Single_Model	PC(20:0/18:1)	-0.675952	0.731472	-0.924099	0.355435		Anova	model.00	4	59.89	67.846	-25.945	51.89	model.01	5	60.992	70.937	-25.496	50.992	0.8983	1	0.3432	nsig	HMDB08269
Single_Model	PC(20:0/18:2)	-0.755637	0.946333	-0.79849	0.424586		Anova	model.00	4	59.89	67.846	-25.945	51.89	model.01	5	61.066	71.011	-25.533	51.066	0.8238	1	0.3641	nsig	HMDB08270
Single_Model	PE(16:0/20:4)	-1.84425	0.957709	-1.92569	0.0541426		Anova	model.00	4	59.89	67.846	-25.945	51.89	model.01	5	55.873	65.818	-22.936	45.873	6.0173	1	0.01417	nsig	HMDB08937
Single_Model	PE(16:0/22:6)	0.0915757	0.478598	0.191342	0.848258		Anova	model.00	4	59.89	67.846	-25.945	51.89	model.01	5	61.853	71.798	-25.927	51.853	0.0369	1	0.8476	nsig	HMDB08946
Single_Model	PE(18:0/20:3)	0.958074	0.535518	1.78906	0.0736052		Anova	model.00	4	59.89	67.846	-25.945	51.89	model.01	5	58.312	68.256	-24.156	48.312	3.5784	1	0.05854	nsig	HMDB11382
Single_Model	PE(18:0/20:4)	-1.05021	0.600946	-1.74759	0.0805357		Anova	model.00	4	59.89	67.846	-25.945	51.89	model.01	5	58.518	68.463	-24.259	48.518	3.3717	1	0.06633	nsig	HMDB09003
Single_Model	PE(18:0/22:4)	-0.473811	0.693383	-0.683332	0.494397		Anova	model.00	4	59.89	67.846	-25.945	51.89	model.01	5	61.416	71.361	-25.708	51.416	0.474	1	0.4912	nsig	HMDB09009
Single_Model	PE(18:0/22:6)	-0.769597	0.55819	-1.37874	0.167976		Anova	model.00	4	59.89	67.846	-25.945	51.89	model.01	5	59.843	69.788	-24.921	49.843	2.0474	1	0.1525	nsig	HMDB09012
Single_Model	PE(18:1/18:1)	-0.498908	0.663177	-0.7523	0.45187		Anova	model.00	4	59.89	67.846	-25.945	51.89	model.01	5	61.328	71.273	-25.664	51.328	0.562	1	0.4535	nsig	HMDB09059
Single_Model	PE(18:1/20:4)	-0.38587	0.542643	-0.711094	0.477026		Anova	model.00	4	59.89	67.846	-25.945	51.89	model.01	5	61.383	71.328	-25.692	51.383	0.5066	1	0.4766	nsig	HMDB09069
Single_Model	PE(O-16:0/18:1)	-0.976572	0.737594	-1.324	0.185504		Anova	model.00	4	59.89	67.846	-25.945	51.89	model.01	5	59.962	69.907	-24.981	49.962	1.9281	1	0.165	nsig	HMDB11157
Single_Model	PE(O-18:0/20:4)	-1.21283	0.789815	-1.53559	0.12464		Anova	model.00	4	59.89	67.846	-25.945	51.89	model.01	5	59.157	69.102	-24.579	49.157	2.7327	1	0.09831	nsig
Single_Model	PE(P-16:0/18:1)	-0.75869	0.640803	-1.18397	0.236426		Anova	model.00	4	59.89	67.846	-25.945	51.89	model.01	5	60.377	70.322	-25.189	50.377	1.5128	1	0.2187	nsig	HMDB11342
Single_Model	PE(P-16:0/20:3)	0.476013	0.41703	1.14144	0.253689		Anova	model.00	4	59.89	67.846	-25.945	51.89	model.01	5	60.565	70.51	-25.282	50.565	1.3254	1	0.2496	nsig	HMDB11351
Single_Model	PE(P-16:0/20:4)	-1.5352	0.943249	-1.62756	0.103618		Anova	model.00	4	59.89	67.846	-25.945	51.89	model.01	5	57.588	67.533	-23.794	47.588	4.3019	1	0.03807	nsig	HMDB11353
Single_Model	PE(P-16:0/22:6)	-0.0468222	0.323949	-0.144536	0.885077		Anova	model.00	4	59.89	67.846	-25.945	51.89	model.01	5	61.869	71.814	-25.934	51.869	0.0212	1	0.8842	nsig
Single_Model	PE(P-18:0/20:3)	0.590884	0.407585	1.44972	0.147137		Anova	model.00	4	59.89	67.846	-25.945	51.89	model.01	5	59.71	69.655	-24.855	49.71	2.1801	1	0.1398	nsig	HMDB11384
Single_Model	PE(P-18:0/22:6)	-0.0217889	0.328847	-0.0662584	0.947172		Anova	model.00	4	59.89	67.846	-25.945	51.89	model.01	5	61.886	71.83	-25.943	51.886	0.0044	1	0.947	nsig	HMDB11394
Single_Model	PE(P-18:1/18:1)	-0.823893	0.584398	-1.40982	0.158594		Anova	model.00	4	59.89	67.846	-25.945	51.89	model.01	5	59.693	69.638	-24.846	49.693	2.1973	1	0.1383	nsig	HMDB11441
Single_Model	PE(P-18:1/20:3)	-0.0980492	0.503553	-0.194715	0.845616		Anova	model.00	4	59.89	67.846	-25.945	51.89	model.01	5	61.852	71.797	-25.926	51.852	0.038	1	0.8455	nsig	HMDB11450
Single_Model	SM(20:1)	-0.712146	1.08228	-0.658004	0.510536		Anova	model.00	4	59.89	67.846	-25.945	51.89	model.01	5	61.459	71.404	-25.729	51.459	0.4312	1	0.5114	nsig
Single_Model	SM(22:0)	-0.718012	0.813969	-0.882113	0.377716		Anova	model.00	4	59.89	67.846	-25.945	51.89	model.01	5	61.104	71.049	-25.552	51.104	0.7858	1	0.3754	nsig	HMDB12103
Single_Model	SM(22:1)	-1.75745	1.75041	-1.00402	0.31537		Anova	model.00	4	59.89	67.846	-25.945	51.89	model.01	5	60.275	70.22	-25.137	50.275	1.6153	1	0.2037	nsig	HMDB12104
Single_Model	TAG36:0-FA12:0	0.514542	0.306117	1.68087	0.0927888		Anova	model.00	4	59.89	67.846	-25.945	51.89	model.01	5	58.692	68.637	-24.346	48.692	3.1979	1	0.07373	nsig
Single_Model	TAG40:0-FA16:0	-0.0380547	0.1874	-0.203066	0.839083		Anova	model.00	4	59.89	67.846	-25.945	51.89	model.01	5	61.849	71.794	-25.924	51.849	0.0411	1	0.8394	nsig
Single_Model	TAG42:0-FA14:0	0.00717902	0.199181	0.0360427	0.971248		Anova	model.00	4	59.89	67.846	-25.945	51.89	model.01	5	61.889	71.834	-25.944	51.889	0.0013	1	0.9712	nsig
Single_Model	TAG42:0-FA16:0	-0.173695	0.198711	-0.874108	0.38206		Anova	model.00	4	59.89	67.846	-25.945	51.89	model.01	5	61.114	71.059	-25.557	51.114	0.776	1	0.3784	nsig
Single_Model	TAG42:1-FA18:1	0.0397849	0.19353	0.205575	0.837123		Anova	model.00	4	59.89	67.846	-25.945	51.89	model.01	5	61.847	71.792	-25.924	51.847	0.0426	1	0.8365	nsig
Single_Model	TAG44:0-FA12:0	-0.0312932	0.19824	-0.157855	0.874571		Anova	model.00	4	59.89	67.846	-25.945	51.89	model.01	5	61.865	71.81	-25.933	51.865	0.0249	1	0.8747	nsig
Single_Model	TAG44:0-FA14:0	-0.0225079	0.212179	-0.10608	0.915519		Anova	model.00	4	59.89	67.846	-25.945	51.89	model.01	5	61.879	71.824	-25.939	51.879	0.0112	1	0.9156	nsig
Single_Model	TAG44:0-FA16:0	-0.0491883	0.209709	-0.234555	0.814554		Anova	model.00	4	59.89	67.846	-25.945	51.89	model.01	5	61.835	71.78	-25.918	51.835	0.0548	1	0.815	nsig
Single_Model	TAG44:1-FA12:0	0.0574283	0.17435	0.329386	0.741864		Anova	model.00	4	59.89	67.846	-25.945	51.89	model.01	5	61.78	71.725	-25.89	51.78	0.1099	1	0.7402	nsig
Single_Model	TAG44:1-FA14:0	0.0946562	0.183381	0.516173	0.605734		Anova	model.00	4	59.89	67.846	-25.945	51.89	model.01	5	61.618	71.562	-25.809	51.618	0.2725	1	0.6017	nsig
Single_Model	TAG44:1-FA16:0	-0.0167672	0.183509	-0.0913701	0.927199		Anova	model.00	4	59.89	67.846	-25.945	51.89	model.01	5	61.882	71.827	-25.941	51.882	0.0083	1	0.9273	nsig
Single_Model	TAG44:1-FA16:1	0.259721	0.226036	1.14902	0.250547		Anova	model.00	4	59.89	67.846	-25.945	51.89	model.01	5	60.451	70.396	-25.226	50.451	1.4391	1	0.2303	nsig
Single_Model	TAG44:1-FA18:1	0.0807545	0.222292	0.363281	0.716395		Anova	model.00	4	59.89	67.846	-25.945	51.89	model.01	5	61.756	71.701	-25.878	51.756	0.1343	1	0.714	nsig
Single_Model	TAG44:2-FA16:0	-0.0805227	0.172802	-0.465983	0.641228		Anova	model.00	4	59.89	67.846	-25.945	51.89	model.01	5	61.673	71.618	-25.837	51.673	0.217	1	0.6414	nsig
Single_Model	TAG44:2-FA18:1	-0.0555347	0.186708	-0.297442	0.766129		Anova	model.00	4	59.89	67.846	-25.945	51.89	model.01	5	61.802	71.747	-25.901	51.802	0.0883	1	0.7664	nsig
Single_Model	TAG44:2-FA18:2	0.0441115	0.213795	0.206326	0.836536		Anova	model.00	4	59.89	67.846	-25.945	51.89	model.01	5	61.847	71.792	-25.924	51.847	0.043	1	0.8358	nsig
Single_Model	TAG45:0-FA14:0	0.298653	0.265881	1.12326	0.261329		Anova	model.00	4	59.89	67.846	-25.945	51.89	model.01	5	60.527	70.472	-25.263	50.527	1.3632	1	0.243	nsig
Single_Model	TAG45:0-FA15:0	0.421827	0.255296	1.65231	0.0984716		Anova	model.00	4	59.89	67.846	-25.945	51.89	model.01	5	58.79	68.735	-24.395	48.79	3.0998	1	0.0783	nsig
Single_Model	TAG45:0-FA16:0	0.11208	0.271114	0.413405	0.67931		Anova	model.00	4	59.89	67.846	-25.945	51.89	model.01	5	61.716	71.661	-25.858	51.716	0.174	1	0.6766	nsig
Single_Model	TAG45:1-FA16:0	-0.0300996	0.218904	-0.137501	0.890635		Anova	model.00	4	59.89	67.846	-25.945	51.89	model.01	5	61.871	71.816	-25.936	51.871	0.0189	1	0.8908	nsig
Single_Model	TAG45:1-FA18:1	0.305431	0.243131	1.25624	0.209028		Anova	model.00	4	59.89	67.846	-25.945	51.89	model.01	5	60.189	70.134	-25.095	50.189	1.7011	1	0.1921	nsig
Single_Model	TAG46:0-FA14:0	-0.126523	0.215587	-0.586875	0.557288		Anova	model.00	4	59.89	67.846	-25.945	51.89	model.01	5	61.546	71.491	-25.773	51.546	0.3438	1	0.5577	nsig
Single_Model	TAG46:0-FA16:0	-0.150827	0.210371	-0.716954	0.473403		Anova	model.00	4	59.89	67.846	-25.945	51.89	model.01	5	61.375	71.32	-25.688	51.375	0.5145	1	0.4732	nsig
Single_Model	TAG46:0-FA18:0	-0.0128491	0.21318	-0.0602734	0.951938		Anova	model.00	4	59.89	67.846	-25.945	51.89	model.01	5	61.886	71.831	-25.943	51.886	0.0036	1	0.952	nsig
Single_Model	TAG46:1-FA12:0	0.000662122	0.185982	0.00356014	0.997159		Anova	model.00	4	59.89	67.846	-25.945	51.89	model.01	5	61.89	71.835	-25.945	51.89	0	1	0.9972	nsig
Single_Model	TAG46:1-FA14:0	-0.0400546	0.190511	-0.210248	0.833474		Anova	model.00	4	59.89	67.846	-25.945	51.89	model.01	5	61.846	71.791	-25.923	51.846	0.0441	1	0.8337	nsig
Single_Model	TAG46:1-FA14:1	-0.116187	0.230331	-0.504436	0.613955		Anova	model.00	4	59.89	67.846	-25.945	51.89	model.01	5	61.635	71.58	-25.817	51.635	0.255	1	0.6136	nsig
Single_Model	TAG46:1-FA16:0	-0.0436891	0.189379	-0.230697	0.81755		Anova	model.00	4	59.89	67.846	-25.945	51.89	model.01	5	61.837	71.782	-25.919	51.837	0.053	1	0.8179	nsig
Single_Model	TAG46:1-FA16:1	0.0605285	0.214717	0.2819	0.778021		Anova	model.00	4	59.89	67.846	-25.945	51.89	model.01	5	61.81	71.755	-25.905	51.81	0.0803	1	0.7769	nsig
Single_Model	TAG46:1-FA18:0	0.273406	0.235797	1.1595	0.246254		Anova	model.00	4	59.89	67.846	-25.945	51.89	model.01	5	60.423	70.368	-25.212	50.423	1.4667	1	0.2259	nsig
Single_Model	TAG46:1-FA18:1	0.175817	0.240036	0.732462	0.463887		Anova	model.00	4	59.89	67.846	-25.945	51.89	model.01	5	61.325	71.27	-25.662	51.325	0.5654	1	0.4521	nsig
Single_Model	TAG46:2-FA12:0	-0.069619	0.171082	-0.406934	0.684057		Anova	model.00	4	59.89	67.846	-25.945	51.89	model.01	5	61.725	71.67	-25.863	51.725	0.1649	1	0.6847	nsig
Single_Model	TAG46:2-FA14:0	-0.0679478	0.170951	-0.397469	0.691022		Anova	model.00	4	59.89	67.846	-25.945	51.89	model.01	5	61.732	71.677	-25.866	51.732	0.1575	1	0.6915	nsig
Single_Model	TAG46:2-FA16:0	-0.12523	0.176617	-0.709047	0.478295		Anova	model.00	4	59.89	67.846	-25.945	51.89	model.01	5	61.387	71.332	-25.693	51.387	0.5033	1	0.4781	nsig
Single_Model	TAG46:2-FA16:1	0.102112	0.198663	0.513994	0.607256		Anova	model.00	4	59.89	67.846	-25.945	51.89	model.01	5	61.62	71.565	-25.81	51.62	0.2704	1	0.6031	nsig
Single_Model	TAG46:2-FA18:1	0.19761	0.24583	0.803848	0.421485		Anova	model.00	4	59.89	67.846	-25.945	51.89	model.01	5	61.2	71.145	-25.6	51.2	0.69	1	0.4062	nsig
Single_Model	TAG46:2-FA18:2	0.00988297	0.209818	0.0471027	0.962431		Anova	model.00	4	59.89	67.846	-25.945	51.89	model.01	5	61.888	71.833	-25.944	51.888	0.0022	1	0.9624	nsig
Single_Model	TAG46:3-FA18:1	0.152467	0.252712	0.603324	0.546293		Anova	model.00	4	59.89	67.846	-25.945	51.89	model.01	5	61.511	71.456	-25.755	51.511	0.3792	1	0.538	nsig
Single_Model	TAG46:3-FA18:2	0.084695	0.218495	0.387629	0.69829		Anova	model.00	4	59.89	67.846	-25.945	51.89	model.01	5	61.737	71.682	-25.868	51.737	0.1532	1	0.6955	nsig
Single_Model	TAG47:0-FA14:0	0.0553926	0.264723	0.209247	0.834255		Anova	model.00	4	59.89	67.846	-25.945	51.89	model.01	5	61.846	71.791	-25.923	51.846	0.0441	1	0.8337	nsig
Single_Model	TAG47:0-FA15:0	0.03779	0.293382	0.128808	0.89751		Anova	model.00	4	59.89	67.846	-25.945	51.89	model.01	5	61.873	71.818	-25.937	51.873	0.0167	1	0.8973	nsig
Single_Model	TAG47:0-FA16:0	-0.0603455	0.278772	-0.216469	0.828622		Anova	model.00	4	59.89	67.846	-25.945	51.89	model.01	5	61.843	71.788	-25.922	51.843	0.0467	1	0.8289	nsig
Single_Model	TAG47:0-FA17:0	-0.144725	0.322728	-0.448443	0.653833		Anova	model.00	4	59.89	67.846	-25.945	51.89	model.01	5	61.688	71.633	-25.844	51.688	0.202	1	0.6531	nsig
Single_Model	TAG47:1-FA14:0	0.0140716	0.216431	0.0650167	0.948161		Anova	model.00	4	59.89	67.846	-25.945	51.89	model.01	5	61.886	71.831	-25.943	51.886	0.0042	1	0.9481	nsig
Single_Model	TAG47:1-FA15:0	0.208654	0.256097	0.814745	0.415219		Anova	model.00	4	59.89	67.846	-25.945	51.89	model.01	5	61.184	71.129	-25.592	51.184	0.7056	1	0.4009	nsig
Single_Model	TAG47:1-FA16:0	0.0159119	0.231965	0.0685963	0.945311		Anova	model.00	4	59.89	67.846	-25.945	51.89	model.01	5	61.885	71.83	-25.943	51.885	0.0047	1	0.9453	nsig
Single_Model	TAG47:1-FA16:1	-0.794085	0.928397	-0.855329	0.392369		Anova	model.00	4	59.89	67.846	-25.945	51.89	model.01	5	59.226	69.171	-24.613	49.226	2.6641	1	0.1026	nsig
Single_Model	TAG47:1-FA18:1	0.358158	0.28263	1.26723	0.205073		Anova	model.00	4	59.89	67.846	-25.945	51.89	model.01	5	60.046	69.991	-25.023	50.046	1.8444	1	0.1744	nsig
Single_Model	TAG47:2-FA18:1	0.0947089	0.237214	0.399256	0.689705		Anova	model.00	4	59.89	67.846	-25.945	51.89	model.01	5	61.728	71.673	-25.864	51.728	0.162	1	0.6873	nsig
Single_Model	TAG47:2-FA18:2	0.0297159	0.205648	0.144499	0.885107		Anova	model.00	4	59.89	67.846	-25.945	51.89	model.01	5	61.869	71.814	-25.934	51.869	0.021	1	0.8848	nsig
Single_Model	TAG48:0-FA14:0	-0.051789	0.216503	-0.239207	0.810945		Anova	model.00	4	59.89	67.846	-25.945	51.89	model.01	5	61.833	71.778	-25.916	51.833	0.0571	1	0.8112	nsig
Single_Model	TAG48:0-FA16:0	-0.194711	0.244527	-0.796277	0.425871		Anova	model.00	4	59.89	67.846	-25.945	51.89	model.01	5	61.253	71.198	-25.626	51.253	0.6373	1	0.4247	nsig
Single_Model	TAG48:0-FA18:0	-0.04204	0.224172	-0.187534	0.851242		Anova	model.00	4	59.89	67.846	-25.945	51.89	model.01	5	61.855	71.8	-25.927	51.855	0.035	1	0.8516	nsig
Single_Model	TAG48:1-FA12:0	0.152612	0.191873	0.795378	0.426394		Anova	model.00	4	59.89	67.846	-25.945	51.89	model.01	5	61.229	71.174	-25.614	51.229	0.6614	1	0.4161	nsig
Single_Model	TAG48:1-FA14:0	-0.0927676	0.200611	-0.462425	0.643777		Anova	model.00	4	59.89	67.846	-25.945	51.89	model.01	5	61.676	71.621	-25.838	51.676	0.2136	1	0.6439	nsig
Single_Model	TAG48:1-FA16:0	-0.133601	0.203109	-0.657781	0.510679		Anova	model.00	4	59.89	67.846	-25.945	51.89	model.01	5	61.454	71.399	-25.727	51.454	0.4355	1	0.5093	nsig
Single_Model	TAG48:1-FA16:1	-0.101284	0.219492	-0.461448	0.644477		Anova	model.00	4	59.89	67.846	-25.945	51.89	model.01	5	61.677	71.622	-25.838	51.677	0.2134	1	0.6441	nsig
Single_Model	TAG48:1-FA18:0	0.00432469	0.200761	0.0215415	0.982814		Anova	model.00	4	59.89	67.846	-25.945	51.89	model.01	5	61.89	71.834	-25.945	51.89	0.0005	1	0.9828	nsig
Single_Model	TAG48:1-FA18:1	-0.0951879	0.198009	-0.480724	0.630713		Anova	model.00	4	59.89	67.846	-25.945	51.89	model.01	5	61.659	71.604	-25.83	51.659	0.2309	1	0.6309	nsig
Single_Model	TAG48:2-FA12:0	0.00959603	0.175823	0.0545778	0.956475		Anova	model.00	4	59.89	67.846	-25.945	51.89	model.01	5	61.887	71.832	-25.944	51.887	0.003	1	0.9564	nsig
Single_Model	TAG48:2-FA14:0	-0.115656	0.190811	-0.606128	0.54443		Anova	model.00	4	59.89	67.846	-25.945	51.89	model.01	5	61.522	71.467	-25.761	51.522	0.3682	1	0.544	nsig
Single_Model	TAG48:2-FA14:1	-0.0569384	0.163542	-0.348157	0.727723		Anova	model.00	4	59.89	67.846	-25.945	51.89	model.01	5	61.769	71.713	-25.884	51.769	0.1215	1	0.7274	nsig
Single_Model	TAG48:2-FA16:0	-0.122104	0.187525	-0.651137	0.514958		Anova	model.00	4	59.89	67.846	-25.945	51.89	model.01	5	61.464	71.409	-25.732	51.464	0.4262	1	0.5138	nsig
Single_Model	TAG48:2-FA16:1	-0.0395512	0.182963	-0.216171	0.828855		Anova	model.00	4	59.89	67.846	-25.945	51.89	model.01	5	61.843	71.788	-25.922	51.843	0.0466	1	0.829	nsig
Single_Model	TAG48:2-FA18:1	-0.0141869	0.179691	-0.078952	0.937071		Anova	model.00	4	59.89	67.846	-25.945	51.89	model.01	5	61.884	71.829	-25.942	51.884	0.0062	1	0.9371	nsig
Single_Model	TAG48:2-FA18:2	-0.117549	0.193957	-0.606059	0.544476		Anova	model.00	4	59.89	67.846	-25.945	51.89	model.01	5	61.522	71.467	-25.761	51.522	0.3679	1	0.5442	nsig
Single_Model	TAG48:3-FA12:0	-0.0182974	0.17115	-0.106908	0.914862		Anova	model.00	4	59.89	67.846	-25.945	51.89	model.01	5	61.879	71.824	-25.939	51.879	0.0114	1	0.915	nsig
Single_Model	TAG48:3-FA14:0	-0.0827108	0.1678	-0.492914	0.622074		Anova	model.00	4	59.89	67.846	-25.945	51.89	model.01	5	61.646	71.591	-25.823	51.646	0.2435	1	0.6217	nsig
Single_Model	TAG48:3-FA14:1	-0.0890023	0.168391	-0.528545	0.597121		Anova	model.00	4	59.89	67.846	-25.945	51.89	model.01	5	61.61	71.555	-25.805	51.61	0.2802	1	0.5966	nsig
Single_Model	TAG48:3-FA16:0	-0.113439	0.167679	-0.676523	0.498709		Anova	model.00	4	59.89	67.846	-25.945	51.89	model.01	5	61.426	71.371	-25.713	51.426	0.4636	1	0.4959	nsig
Single_Model	TAG48:3-FA16:1	0.103517	0.193592	0.534716	0.592846		Anova	model.00	4	59.89	67.846	-25.945	51.89	model.01	5	61.596	71.541	-25.798	51.596	0.2939	1	0.5877	nsig
Single_Model	TAG48:3-FA18:1	-0.063114	0.17123	-0.368591	0.712432		Anova	model.00	4	59.89	67.846	-25.945	51.89	model.01	5	61.755	71.7	-25.877	51.755	0.1353	1	0.713	nsig
Single_Model	TAG48:3-FA18:2	-0.0764593	0.171109	-0.446846	0.654986		Anova	model.00	4	59.89	67.846	-25.945	51.89	model.01	5	61.69	71.635	-25.845	51.69	0.1996	1	0.655	nsig
Single_Model	TAG48:4-FA16:1	0.166785	0.201004	0.829759	0.406675		Anova	model.00	4	59.89	67.846	-25.945	51.89	model.01	5	61.171	71.116	-25.586	51.171	0.7189	1	0.3965	nsig
Single_Model	TAG48:4-FA18:2	-0.0379706	0.174564	-0.217517	0.827805		Anova	model.00	4	59.89	67.846	-25.945	51.89	model.01	5	61.843	71.788	-25.921	51.843	0.0471	1	0.8281	nsig
Single_Model	TAG49:0-FA15:0	-0.0913312	0.251225	-0.363543	0.716199		Anova	model.00	4	59.89	67.846	-25.945	51.89	model.01	5	61.758	71.702	-25.879	51.758	0.1325	1	0.7159	nsig
Single_Model	TAG49:0-FA16:0	-0.16415	0.283713	-0.578577	0.562875		Anova	model.00	4	59.89	67.846	-25.945	51.89	model.01	5	61.555	71.5	-25.778	51.555	0.3346	1	0.563	nsig
Single_Model	TAG49:0-FA17:0	-0.144304	0.289879	-0.497809	0.618619		Anova	model.00	4	59.89	67.846	-25.945	51.89	model.01	5	61.643	71.588	-25.821	51.643	0.2473	1	0.619	nsig
Single_Model	TAG49:0-FA18:0	0.0604512	0.282937	0.213656	0.830816		Anova	model.00	4	59.89	67.846	-25.945	51.89	model.01	5	61.844	71.789	-25.922	51.844	0.0461	1	0.83	nsig
Single_Model	TAG49:1-FA14:0	-0.166834	0.202237	-0.824939	0.409406		Anova	model.00	4	59.89	67.846	-25.945	51.89	model.01	5	61.197	71.142	-25.598	51.197	0.6932	1	0.4051	nsig
Single_Model	TAG49:1-FA15:0	-0.128162	0.237842	-0.538855	0.589987		Anova	model.00	4	59.89	67.846	-25.945	51.89	model.01	5	61.599	71.544	-25.8	51.599	0.2907	1	0.5897	nsig
Single_Model	TAG49:1-FA16:0	-0.126424	0.244883	-0.516265	0.60567		Anova	model.00	4	59.89	67.846	-25.945	51.89	model.01	5	61.623	71.568	-25.811	51.623	0.267	1	0.6054	nsig
Single_Model	TAG49:1-FA16:1	0.233394	0.330547	0.706085	0.480136		Anova	model.00	4	59.89	67.846	-25.945	51.89	model.01	5	61.373	71.318	-25.686	51.373	0.5169	1	0.4722	nsig
Single_Model	TAG49:1-FA17:0	-0.072282	0.225462	-0.320595	0.748518		Anova	model.00	4	59.89	67.846	-25.945	51.89	model.01	5	61.787	71.732	-25.894	51.787	0.1028	1	0.7484	nsig
Single_Model	TAG49:1-FA18:1	-0.0689601	0.235877	-0.292357	0.770014		Anova	model.00	4	59.89	67.846	-25.945	51.89	model.01	5	61.805	71.75	-25.902	51.805	0.0853	1	0.7703	nsig
Single_Model	TAG49:2-FA14:0	-0.0155548	0.193767	-0.0802758	0.936018		Anova	model.00	4	59.89	67.846	-25.945	51.89	model.01	5	61.884	71.828	-25.942	51.884	0.0064	1	0.9361	nsig
Single_Model	TAG49:2-FA15:0	-0.553495	0.495958	-1.11601	0.264417		Anova	model.00	4	59.89	67.846	-25.945	51.89	model.01	5	60.913	70.858	-25.457	50.913	0.9767	1	0.323	nsig
Single_Model	TAG49:2-FA16:0	-0.0832208	0.234994	-0.35414	0.723234		Anova	model.00	4	59.89	67.846	-25.945	51.89	model.01	5	61.765	71.71	-25.882	51.765	0.1253	1	0.7234	nsig
Single_Model	TAG49:2-FA16:1	0.432155	0.348376	1.24049	0.214796		Anova	model.00	4	59.89	67.846	-25.945	51.89	model.01	5	60.112	70.057	-25.056	50.112	1.778	1	0.1824	nsig
Single_Model	TAG49:2-FA18:1	0.0566521	0.205861	0.275196	0.783165		Anova	model.00	4	59.89	67.846	-25.945	51.89	model.01	5	61.814	71.758	-25.907	51.814	0.0765	1	0.7821	nsig
Single_Model	TAG49:2-FA18:2	-0.216335	0.230759	-0.937495	0.348504		Anova	model.00	4	59.89	67.846	-25.945	51.89	model.01	5	60.994	70.939	-25.497	50.994	0.8962	1	0.3438	nsig
Single_Model	TAG49:3-FA16:1	0.230591	0.322803	0.71434	0.475017		Anova	model.00	4	59.89	67.846	-25.945	51.89	model.01	5	61.356	71.3	-25.678	51.356	0.5344	1	0.4647	nsig
Single_Model	TAG49:3-FA18:2	-0.0127742	0.186548	-0.0684766	0.945406		Anova	model.00	4	59.89	67.846	-25.945	51.89	model.01	5	61.885	71.83	-25.943	51.885	0.0047	1	0.9454	nsig
Single_Model	TAG50:0-FA14:0	-0.058805	0.224977	-0.261382	0.793798		Anova	model.00	4	59.89	67.846	-25.945	51.89	model.01	5	61.822	71.767	-25.911	51.822	0.0683	1	0.7939	nsig
Single_Model	TAG50:0-FA16:0	-0.148642	0.26425	-0.562506	0.573771		Anova	model.00	4	59.89	67.846	-25.945	51.89	model.01	5	61.573	71.518	-25.787	51.573	0.317	1	0.5734	nsig
Single_Model	TAG50:0-FA18:0	-0.219724	0.279482	-0.786181	0.431761		Anova	model.00	4	59.89	67.846	-25.945	51.89	model.01	5	61.269	71.214	-25.635	51.269	0.6209	1	0.4307	nsig
Single_Model	TAG50:1-FA14:0	-0.034404	0.216066	-0.159229	0.873489		Anova	model.00	4	59.89	67.846	-25.945	51.89	model.01	5	61.865	71.81	-25.932	51.865	0.0253	1	0.8737	nsig
Single_Model	TAG50:1-FA16:0	-0.159372	0.23612	-0.67496	0.499701		Anova	model.00	4	59.89	67.846	-25.945	51.89	model.01	5	61.43	71.375	-25.715	51.43	0.4602	1	0.4975	nsig
Single_Model	TAG50:1-FA16:1	-0.147909	0.213676	-0.69221	0.488805		Anova	model.00	4	59.89	67.846	-25.945	51.89	model.01	5	61.406	71.351	-25.703	51.406	0.4839	1	0.4867	nsig
Single_Model	TAG50:1-FA18:0	-0.111893	0.218886	-0.511194	0.609215		Anova	model.00	4	59.89	67.846	-25.945	51.89	model.01	5	61.629	71.574	-25.814	51.629	0.2612	1	0.6093	nsig
Single_Model	TAG50:1-FA18:1	-0.157786	0.233817	-0.674828	0.499785		Anova	model.00	4	59.89	67.846	-25.945	51.89	model.01	5	61.43	71.375	-25.715	51.43	0.4597	1	0.4978	nsig
Single_Model	TAG50:2-FA14:0	-0.0510739	0.191038	-0.26735	0.7892		Anova	model.00	4	59.89	67.846	-25.945	51.89	model.01	5	61.819	71.764	-25.909	51.819	0.0712	1	0.7896	nsig
Single_Model	TAG50:2-FA14:1	0.0786198	0.196947	0.399193	0.689751		Anova	model.00	4	59.89	67.846	-25.945	51.89	model.01	5	61.728	71.673	-25.864	51.728	0.1616	1	0.6876	nsig
Single_Model	TAG50:2-FA16:0	-0.603483	0.491098	-1.22884	0.21913		Anova	model.00	4	59.89	67.846	-25.945	51.89	model.01	5	60.725	70.67	-25.362	50.725	1.1651	1	0.2804	nsig
Single_Model	TAG50:2-FA16:1	-0.101028	0.188344	-0.536404	0.591679		Anova	model.00	4	59.89	67.846	-25.945	51.89	model.01	5	61.601	71.546	-25.8	51.601	0.289	1	0.5909	nsig
Single_Model	TAG50:2-FA18:0	-0.105119	0.207525	-0.506537	0.61248		Anova	model.00	4	59.89	67.846	-25.945	51.89	model.01	5	61.634	71.579	-25.817	51.634	0.2557	1	0.6131	nsig
Single_Model	TAG50:2-FA18:1	-0.0958557	0.185326	-0.517228	0.604997		Anova	model.00	4	59.89	67.846	-25.945	51.89	model.01	5	61.622	71.567	-25.811	51.622	0.268	1	0.6047	nsig
Single_Model	TAG50:2-FA18:2	-0.679311	0.499537	-1.35988	0.173867		Anova	model.00	4	59.89	67.846	-25.945	51.89	model.01	5	60.416	70.361	-25.208	50.416	1.4738	1	0.2247	nsig
Single_Model	TAG50:3-FA14:0	-0.074493	0.187663	-0.396951	0.691404		Anova	model.00	4	59.89	67.846	-25.945	51.89	model.01	5	61.733	71.678	-25.866	51.733	0.157	1	0.6919	nsig
Single_Model	TAG50:3-FA14:1	-0.0042773	0.182985	-0.0233751	0.981351		Anova	model.00	4	59.89	67.846	-25.945	51.89	model.01	5	61.889	71.834	-25.945	51.889	0.0005	1	0.9814	nsig
Single_Model	TAG50:3-FA16:0	-0.429226	0.468615	-0.915947	0.359695		Anova	model.00	4	59.89	67.846	-25.945	51.89	model.01	5	61.246	71.191	-25.623	51.246	0.6443	1	0.4222	nsig
Single_Model	TAG50:3-FA16:1	-0.128661	0.185336	-0.694206	0.487553		Anova	model.00	4	59.89	67.846	-25.945	51.89	model.01	5	61.403	71.348	-25.702	51.403	0.4868	1	0.4854	nsig
Single_Model	TAG50:3-FA18:1	-0.0804019	0.178981	-0.44922	0.653273		Anova	model.00	4	59.89	67.846	-25.945	51.89	model.01	5	61.688	71.633	-25.844	51.688	0.2015	1	0.6535	nsig
Single_Model	TAG50:3-FA18:2	-0.126608	0.188866	-0.670355	0.502631		Anova	model.00	4	59.89	67.846	-25.945	51.89	model.01	5	61.438	71.383	-25.719	51.438	0.4524	1	0.5012	nsig
Single_Model	TAG50:3-FA18:3	-0.508634	0.51374	-0.990059	0.322145		Anova	model.00	4	59.89	67.846	-25.945	51.89	model.01	5	61.283	71.228	-25.642	51.283	0.6066	1	0.4361	nsig
Single_Model	TAG50:4-FA14:0	-0.00117095	0.186155	-0.0062902	0.994981		Anova	model.00	4	59.89	67.846	-25.945	51.89	model.01	5	61.89	71.835	-25.945	51.89	0	1	0.995	nsig
Single_Model	TAG50:4-FA14:1	-0.0422132	0.174451	-0.241977	0.808798		Anova	model.00	4	59.89	67.846	-25.945	51.89	model.01	5	61.832	71.777	-25.916	51.832	0.0584	1	0.8091	nsig
Single_Model	TAG50:4-FA16:0	-0.0940124	0.170667	-0.550852	0.581735		Anova	model.00	4	59.89	67.846	-25.945	51.89	model.01	5	61.584	71.529	-25.792	51.584	0.3061	1	0.5801	nsig
Single_Model	TAG50:4-FA16:1	-0.0193403	0.179395	-0.107808	0.914148		Anova	model.00	4	59.89	67.846	-25.945	51.89	model.01	5	61.878	71.823	-25.939	51.878	0.0116	1	0.9142	nsig
Single_Model	TAG50:4-FA18:1	-0.0189454	0.169561	-0.111732	0.911036		Anova	model.00	4	59.89	67.846	-25.945	51.89	model.01	5	61.878	71.822	-25.939	51.878	0.0125	1	0.9111	nsig
Single_Model	TAG50:4-FA18:2	-0.0299964	0.181315	-0.165438	0.868599		Anova	model.00	4	59.89	67.846	-25.945	51.89	model.01	5	61.863	71.808	-25.931	51.863	0.0273	1	0.8688	nsig
Single_Model	TAG50:4-FA18:3	-0.0542738	0.180016	-0.301494	0.763038		Anova	model.00	4	59.89	67.846	-25.945	51.89	model.01	5	61.799	71.744	-25.9	51.799	0.0906	1	0.7634	nsig
Single_Model	TAG51:0-FA16:0	-0.273668	0.294453	-0.929412	0.352675		Anova	model.00	4	59.89	67.846	-25.945	51.89	model.01	5	61.009	70.954	-25.505	51.009	0.8809	1	0.3479	nsig
Single_Model	TAG51:0-FA17:0	-0.0710054	0.292969	-0.242365	0.808497		Anova	model.00	4	59.89	67.846	-25.945	51.89	model.01	5	61.832	71.776	-25.916	51.832	0.0584	1	0.809	nsig
Single_Model	TAG51:0-FA18:0	-0.126077	0.28172	-0.447524	0.654496		Anova	model.00	4	59.89	67.846	-25.945	51.89	model.01	5	61.688	71.633	-25.844	51.688	0.2018	1	0.6533	nsig
Single_Model	TAG51:1-FA15:0	-0.170281	0.267747	-0.63598	0.52479		Anova	model.00	4	59.89	67.846	-25.945	51.89	model.01	5	61.483	71.428	-25.741	51.483	0.4074	1	0.5233	nsig
Single_Model	TAG51:1-FA16:0	-0.0472846	0.265681	-0.177975	0.858742		Anova	model.00	4	59.89	67.846	-25.945	51.89	model.01	5	61.858	71.803	-25.929	51.858	0.0316	1	0.8589	nsig
Single_Model	TAG51:1-FA17:0	-0.0469107	0.256826	-0.182655	0.855068		Anova	model.00	4	59.89	67.846	-25.945	51.89	model.01	5	61.857	71.802	-25.928	51.857	0.0333	1	0.8553	nsig
Single_Model	TAG51:1-FA18:0	-0.00785243	0.273421	-0.0287192	0.977089		Anova	model.00	4	59.89	67.846	-25.945	51.89	model.01	5	61.889	71.834	-25.945	51.889	0.0008	1	0.9771	nsig
Single_Model	TAG51:1-FA18:1	-0.0637991	0.253752	-0.251423	0.801487		Anova	model.00	4	59.89	67.846	-25.945	51.89	model.01	5	61.827	71.772	-25.913	51.827	0.063	1	0.8017	nsig
Single_Model	TAG51:2-FA15:0	-0.764767	0.494072	-1.54789	0.121649		Anova	model.00	4	59.89	67.846	-25.945	51.89	model.01	5	60.234	70.178	-25.117	50.234	1.6565	1	0.1981	nsig
Single_Model	TAG51:2-FA16:0	0.104864	0.281512	0.372504	0.709518		Anova	model.00	4	59.89	67.846	-25.945	51.89	model.01	5	61.749	71.694	-25.875	51.749	0.1408	1	0.7075	nsig
Single_Model	TAG51:2-FA16:1	0.0660055	0.209983	0.314338	0.753264		Anova	model.00	4	59.89	67.846	-25.945	51.89	model.01	5	61.79	71.735	-25.895	51.79	0.0997	1	0.7522	nsig
Single_Model	TAG51:2-FA17:0	-0.187852	0.237396	-0.791301	0.428768		Anova	model.00	4	59.89	67.846	-25.945	51.89	model.01	5	61.255	71.2	-25.628	51.255	0.6346	1	0.4257	nsig
Single_Model	TAG51:2-FA18:1	0.0886911	0.234592	0.378066	0.705382		Anova	model.00	4	59.89	67.846	-25.945	51.89	model.01	5	61.745	71.69	-25.872	51.745	0.1453	1	0.7031	nsig
Single_Model	TAG51:2-FA18:2	-0.220805	0.254345	-0.86813	0.385323		Anova	model.00	4	59.89	67.846	-25.945	51.89	model.01	5	61.127	71.072	-25.564	51.127	0.7631	1	0.3824	nsig
Single_Model	TAG51:3-FA15:0	-0.132017	0.201609	-0.654818	0.512585		Anova	model.00	4	59.89	67.846	-25.945	51.89	model.01	5	61.458	71.403	-25.729	51.458	0.4318	1	0.5111	nsig
Single_Model	TAG51:3-FA16:1	0.0831523	0.204902	0.405816	0.684878		Anova	model.00	4	59.89	67.846	-25.945	51.89	model.01	5	61.723	71.668	-25.862	51.723	0.1666	1	0.6831	nsig
Single_Model	TAG51:3-FA18:2	-0.074453	0.199781	-0.372673	0.709392		Anova	model.00	4	59.89	67.846	-25.945	51.89	model.01	5	61.751	71.696	-25.876	51.751	0.1387	1	0.7096	nsig
Single_Model	TAG51:4-FA15:0	-0.75467	0.419748	-1.79791	0.0721908		Anova	model.00	4	59.89	67.846	-25.945	51.89	model.01	5	59.129	69.074	-24.565	49.129	2.7607	1	0.09661	nsig
Single_Model	TAG51:4-FA16:1	0.291929	0.246931	1.18223	0.237115		Anova	model.00	4	59.89	67.846	-25.945	51.89	model.01	5	60.392	70.337	-25.196	50.392	1.4979	1	0.221	nsig
Single_Model	TAG51:4-FA18:2	0.0815645	0.227028	0.359271	0.719393		Anova	model.00	4	59.89	67.846	-25.945	51.89	model.01	5	61.759	71.704	-25.88	51.759	0.131	1	0.7174	nsig
Single_Model	TAG52:0-FA16:0	-0.191573	0.297263	-0.644455	0.51928		Anova	model.00	4	59.89	67.846	-25.945	51.89	model.01	5	61.472	71.417	-25.736	51.472	0.4182	1	0.5178	nsig
Single_Model	TAG52:0-FA18:0	-0.213385	0.301733	-0.707199	0.479443		Anova	model.00	4	59.89	67.846	-25.945	51.89	model.01	5	61.387	71.332	-25.693	51.387	0.5033	1	0.478	nsig
Single_Model	TAG52:1-FA16:0	-0.0779838	0.245215	-0.318022	0.750468		Anova	model.00	4	59.89	67.846	-25.945	51.89	model.01	5	61.789	71.734	-25.895	51.789	0.101	1	0.7507	nsig
Single_Model	TAG52:1-FA16:1	-0.0209097	0.23093	-0.0905455	0.927854		Anova	model.00	4	59.89	67.846	-25.945	51.89	model.01	5	61.882	71.827	-25.941	51.882	0.0082	1	0.9279	nsig
Single_Model	TAG52:1-FA18:0	-0.102738	0.254149	-0.404245	0.686033		Anova	model.00	4	59.89	67.846	-25.945	51.89	model.01	5	61.727	71.672	-25.863	51.727	0.1633	1	0.6861	nsig
Single_Model	TAG52:1-FA18:1	-0.0838257	0.234765	-0.357062	0.721045		Anova	model.00	4	59.89	67.846	-25.945	51.89	model.01	5	61.763	71.708	-25.881	51.763	0.1273	1	0.7212	nsig
Single_Model	TAG52:1-FA20:0	-0.115387	0.243755	-0.473373	0.635947		Anova	model.00	4	59.89	67.846	-25.945	51.89	model.01	5	61.664	71.609	-25.832	51.664	0.2257	1	0.6347	nsig
Single_Model	TAG52:1-FA20:1	-0.169068	0.263369	-0.641944	0.52091		Anova	model.00	4	59.89	67.846	-25.945	51.89	model.01	5	61.469	71.414	-25.735	51.469	0.4207	1	0.5166	nsig
Single_Model	TAG52:2-FA16:0	-0.123726	0.210353	-0.588182	0.55641		Anova	model.00	4	59.89	67.846	-25.945	51.89	model.01	5	61.542	71.487	-25.771	51.542	0.3478	1	0.5554	nsig
Single_Model	TAG52:2-FA16:1	-0.00473724	0.20155	-0.023504	0.981248		Anova	model.00	4	59.89	67.846	-25.945	51.89	model.01	5	61.889	71.834	-25.945	51.889	0.0006	1	0.9813	nsig
Single_Model	TAG52:2-FA18:0	-0.216429	0.246874	-0.876676	0.380663		Anova	model.00	4	59.89	67.846	-25.945	51.89	model.01	5	61.107	71.052	-25.553	51.107	0.7834	1	0.3761	nsig
Single_Model	TAG52:2-FA18:1	-0.093615	0.202568	-0.462142	0.643979		Anova	model.00	4	59.89	67.846	-25.945	51.89	model.01	5	61.676	71.621	-25.838	51.676	0.2137	1	0.6439	nsig
Single_Model	TAG52:2-FA18:2	-0.192114	0.240958	-0.79729	0.425283		Anova	model.00	4	59.89	67.846	-25.945	51.89	model.01	5	61.244	71.189	-25.622	51.244	0.6463	1	0.4214	nsig
Single_Model	TAG52:2-FA20:1	-0.082115	0.188079	-0.436599	0.662402		Anova	model.00	4	59.89	67.846	-25.945	51.89	model.01	5	61.699	71.643	-25.849	51.699	0.1915	1	0.6617	nsig
Single_Model	TAG52:2-FA20:2	-0.612302	0.484181	-1.26461	0.20601		Anova	model.00	4	59.89	67.846	-25.945	51.89	model.01	5	59.922	69.867	-24.961	49.922	1.9675	1	0.1607	nsig
Single_Model	TAG52:3-FA14:0	-0.105807	0.196203	-0.539272	0.589699		Anova	model.00	4	59.89	67.846	-25.945	51.89	model.01	5	61.598	71.543	-25.799	51.598	0.2923	1	0.5888	nsig
Single_Model	TAG52:3-FA16:0	-0.470856	0.577348	-0.81555	0.414757		Anova	model.00	4	59.89	67.846	-25.945	51.89	model.01	5	61.636	71.581	-25.818	51.636	0.2536	1	0.6146	nsig
Single_Model	TAG52:3-FA16:1	-0.046783	0.185594	-0.252072	0.800985		Anova	model.00	4	59.89	67.846	-25.945	51.89	model.01	5	61.827	71.772	-25.913	51.827	0.0634	1	0.8013	nsig
Single_Model	TAG52:3-FA18:0	-0.0658523	0.206165	-0.319415	0.749412		Anova	model.00	4	59.89	67.846	-25.945	51.89	model.01	5	61.788	71.733	-25.894	51.788	0.1017	1	0.7498	nsig
Single_Model	TAG52:3-FA18:1	-0.113225	0.198421	-0.570634	0.568248		Anova	model.00	4	59.89	67.846	-25.945	51.89	model.01	5	61.563	71.508	-25.782	51.563	0.327	1	0.5674	nsig
Single_Model	TAG52:3-FA18:2	-0.123557	0.205178	-0.602194	0.547045		Anova	model.00	4	59.89	67.846	-25.945	51.89	model.01	5	61.525	71.47	-25.762	51.525	0.3649	1	0.5458	nsig
Single_Model	TAG52:3-FA18:3	-0.15942	0.20691	-0.77048	0.441016		Anova	model.00	4	59.89	67.846	-25.945	51.89	model.01	5	61.285	71.23	-25.642	51.285	0.6053	1	0.4365	nsig
Single_Model	TAG52:3-FA20:2	-0.0997055	0.178537	-0.558458	0.576532		Anova	model.00	4	59.89	67.846	-25.945	51.89	model.01	5	61.575	71.52	-25.788	51.575	0.3147	1	0.5748	nsig
Single_Model	TAG52:3-FA20:3	-0.182448	0.240832	-0.757575	0.448706		Anova	model.00	4	59.89	67.846	-25.945	51.89	model.01	5	61.304	71.249	-25.652	51.304	0.5858	1	0.4441	nsig
Single_Model	TAG52:4-FA14:0	0.0199264	0.199522	0.0998706	0.920447		Anova	model.00	4	59.89	67.846	-25.945	51.89	model.01	5	61.88	71.825	-25.94	51.88	0.01	1	0.9204	nsig
Single_Model	TAG52:4-FA16:0	-0.630505	0.510151	-1.23592	0.216489		Anova	model.00	4	59.89	67.846	-25.945	51.89	model.01	5	61.188	71.133	-25.594	51.188	0.7021	1	0.4021	nsig
Single_Model	TAG52:4-FA16:1	-0.0557455	0.188558	-0.295642	0.767504		Anova	model.00	4	59.89	67.846	-25.945	51.89	model.01	5	61.803	71.748	-25.901	51.803	0.0872	1	0.7678	nsig
Single_Model	TAG52:4-FA18:1	-0.07122	0.190108	-0.374629	0.707936		Anova	model.00	4	59.89	67.846	-25.945	51.89	model.01	5	61.75	71.695	-25.875	51.75	0.14	1	0.7082	nsig
Single_Model	TAG52:4-FA18:2	-0.547313	0.499354	-1.09604	0.273061		Anova	model.00	4	59.89	67.846	-25.945	51.89	model.01	5	61.341	71.286	-25.671	51.341	0.5488	1	0.4588	nsig
Single_Model	TAG52:4-FA18:3	-0.53483	0.542311	-0.986206	0.324032		Anova	model.00	4	59.89	67.846	-25.945	51.89	model.01	5	61.611	71.556	-25.805	51.611	0.2793	1	0.5972	nsig
Single_Model	TAG52:4-FA20:3	-0.061027	0.172742	-0.353284	0.723875		Anova	model.00	4	59.89	67.846	-25.945	51.89	model.01	5	61.765	71.71	-25.883	51.765	0.1249	1	0.7237	nsig
Single_Model	TAG52:4-FA20:4	-0.814748	0.55275	-1.47399	0.140484		Anova	model.00	4	59.89	67.846	-25.945	51.89	model.01	5	60.629	70.574	-25.314	50.629	1.2613	1	0.2614	nsig
Single_Model	TAG52:5-FA16:0	-0.0854266	0.201634	-0.423671	0.671806		Anova	model.00	4	59.89	67.846	-25.945	51.89	model.01	5	61.711	71.656	-25.855	51.711	0.1792	1	0.672	nsig
Single_Model	TAG52:5-FA16:1	-0.0612689	0.196082	-0.312465	0.754687		Anova	model.00	4	59.89	67.846	-25.945	51.89	model.01	5	61.793	71.737	-25.896	51.793	0.0975	1	0.7549	nsig
Single_Model	TAG52:5-FA18:1	-0.0356297	0.180506	-0.197387	0.843525		Anova	model.00	4	59.89	67.846	-25.945	51.89	model.01	5	61.851	71.796	-25.925	51.851	0.0389	1	0.8436	nsig
Single_Model	TAG52:5-FA18:2	-0.0520636	0.200004	-0.260313	0.794622		Anova	model.00	4	59.89	67.846	-25.945	51.89	model.01	5	61.822	71.767	-25.911	51.822	0.0676	1	0.7949	nsig
Single_Model	TAG52:5-FA18:3	-0.543056	0.552018	-0.983763	0.325232		Anova	model.00	4	59.89	67.846	-25.945	51.89	model.01	5	61.597	71.542	-25.799	51.597	0.2926	1	0.5885	nsig
Single_Model	TAG52:5-FA20:4	-0.0746618	0.161577	-0.462081	0.644023		Anova	model.00	4	59.89	67.846	-25.945	51.89	model.01	5	61.675	71.62	-25.837	51.675	0.215	1	0.6429	nsig
Single_Model	TAG52:5-FA20:5	0.370594	0.249543	1.48509	0.137519		Anova	model.00	4	59.89	67.846	-25.945	51.89	model.01	5	59.465	69.409	-24.732	49.465	2.4254	1	0.1194	nsig
Single_Model	TAG52:5-FA22:5	0.0535982	0.202068	0.265248	0.790818		Anova	model.00	4	59.89	67.846	-25.945	51.89	model.01	5	61.819	71.764	-25.909	51.819	0.0712	1	0.7896	nsig
Single_Model	TAG52:6-FA16:0	0.00340566	0.23067	0.0147642	0.98822		Anova	model.00	4	59.89	67.846	-25.945	51.89	model.01	5	61.89	71.835	-25.945	51.89	0.0002	1	0.9882	nsig
Single_Model	TAG52:6-FA18:2	-0.0420823	0.188627	-0.223098	0.823459		Anova	model.00	4	59.89	67.846	-25.945	51.89	model.01	5	61.84	71.785	-25.92	51.84	0.0497	1	0.8236	nsig
Single_Model	TAG52:6-FA18:3	-0.0731167	0.191602	-0.381607	0.702753		Anova	model.00	4	59.89	67.846	-25.945	51.89	model.01	5	61.745	71.69	-25.872	51.745	0.1451	1	0.7032	nsig
Single_Model	TAG52:6-FA20:4	0.0931075	0.190115	0.489743	0.624316		Anova	model.00	4	59.89	67.846	-25.945	51.89	model.01	5	61.644	71.589	-25.822	51.644	0.246	1	0.6199	nsig
Single_Model	TAG52:6-FA22:6	0.0029541	0.189858	0.0155596	0.987586		Anova	model.00	4	59.89	67.846	-25.945	51.89	model.01	5	61.89	71.835	-25.945	51.89	0.0002	1	0.9876	nsig
Single_Model	TAG52:7-FA16:0	-0.197842	0.289815	-0.68265	0.494828		Anova	model.00	4	59.89	67.846	-25.945	51.89	model.01	5	61.418	71.363	-25.709	51.418	0.4724	1	0.4919	nsig
Single_Model	TAG52:7-FA18:1	-0.0248249	0.242719	-0.102279	0.918535		Anova	model.00	4	59.89	67.846	-25.945	51.89	model.01	5	61.88	71.824	-25.94	51.88	0.0105	1	0.9186	nsig
Single_Model	TAG52:8-FA16:1	0.0154997	0.240907	0.0643392	0.9487		Anova	model.00	4	59.89	67.846	-25.945	51.89	model.01	5	61.886	71.831	-25.943	51.886	0.0041	1	0.9487	nsig
Single_Model	TAG53:0-FA16:0	-0.268747	0.294022	-0.914035	0.360698		Anova	model.00	4	59.89	67.846	-25.945	51.89	model.01	5	61.024	70.969	-25.512	51.024	0.8664	1	0.352	nsig
Single_Model	TAG53:1-FA16:0	-0.0474349	0.252689	-0.187721	0.851096		Anova	model.00	4	59.89	67.846	-25.945	51.89	model.01	5	61.855	71.8	-25.927	51.855	0.0353	1	0.8511	nsig
Single_Model	TAG53:1-FA17:0	0.00726284	0.257169	0.0282416	0.977469		Anova	model.00	4	59.89	67.846	-25.945	51.89	model.01	5	61.889	71.834	-25.945	51.889	0.0008	1	0.9775	nsig
Single_Model	TAG53:1-FA18:0	0.135593	0.30259	0.448107	0.654076		Anova	model.00	4	59.89	67.846	-25.945	51.89	model.01	5	61.684	71.629	-25.842	51.684	0.2056	1	0.6502	nsig
Single_Model	TAG53:1-FA18:1	-0.00249963	0.264012	-0.00946787	0.992446		Anova	model.00	4	59.89	67.846	-25.945	51.89	model.01	5	61.89	71.835	-25.945	51.89	0.0001	1	0.9924	nsig
Single_Model	TAG53:2-FA16:0	0.0168644	0.233072	0.072357	0.942318		Anova	model.00	4	59.89	67.846	-25.945	51.89	model.01	5	61.885	71.83	-25.942	51.885	0.0052	1	0.9423	nsig
Single_Model	TAG53:2-FA17:0	5.08e-05	0.232059	0.000218731	0.999826		Anova	model.00	4	59.89	67.846	-25.945	51.89	model.01	5	61.89	71.835	-25.945	51.89	0	1	0.9998	nsig
Single_Model	TAG53:2-FA18:1	0.188245	0.260956	0.721365	0.470685		Anova	model.00	4	59.89	67.846	-25.945	51.89	model.01	5	61.345	71.29	-25.672	51.345	0.5451	1	0.4603	nsig
Single_Model	TAG53:2-FA18:2	-0.161522	0.249506	-0.647366	0.517395		Anova	model.00	4	59.89	67.846	-25.945	51.89	model.01	5	61.462	71.407	-25.731	51.462	0.4275	1	0.5132	nsig
Single_Model	TAG53:3-FA16:0	0.177283	0.24489	0.723928	0.46911		Anova	model.00	4	59.89	67.846	-25.945	51.89	model.01	5	61.339	71.284	-25.67	51.339	0.5506	1	0.4581	nsig
Single_Model	TAG53:3-FA17:0	-0.0531375	0.20754	-0.256035	0.797924		Anova	model.00	4	59.89	67.846	-25.945	51.89	model.01	5	61.824	71.769	-25.912	51.824	0.0655	1	0.798	nsig
Single_Model	TAG53:3-FA18:2	-0.027865	0.219484	-0.126957	0.898974		Anova	model.00	4	59.89	67.846	-25.945	51.89	model.01	5	61.874	71.819	-25.937	51.874	0.0161	1	0.8991	nsig
Single_Model	TAG53:4-FA16:0	-0.030819	0.219912	-0.140142	0.888548		Anova	model.00	4	59.89	67.846	-25.945	51.89	model.01	5	61.87	71.815	-25.935	51.87	0.0196	1	0.8886	nsig
Single_Model	TAG53:4-FA17:0	-0.421946	0.421013	-1.00222	0.316239		Anova	model.00	4	59.89	67.846	-25.945	51.89	model.01	5	61.199	71.144	-25.6	51.199	0.6906	1	0.406	nsig
Single_Model	TAG53:4-FA18:2	0.463221	0.322816	1.43494	0.151305		Anova	model.00	4	59.89	67.846	-25.945	51.89	model.01	5	59.504	69.449	-24.752	49.504	2.3857	1	0.1224	nsig
Single_Model	TAG53:4-FA20:4	-0.843001	0.476204	-1.77025	0.0766853		Anova	model.00	4	59.89	67.846	-25.945	51.89	model.01	5	59.058	69.003	-24.529	49.058	2.8322	1	0.09239	nsig
Single_Model	TAG53:5-FA20:4	0.140427	0.21793	0.644367	0.519338		Anova	model.00	4	59.89	67.846	-25.945	51.89	model.01	5	61.459	71.404	-25.729	51.459	0.4314	1	0.5113	nsig
Single_Model	TAG54:0-FA16:0	-0.170944	0.377331	-0.453035	0.650523		Anova	model.00	4	59.89	67.846	-25.945	51.89	model.01	5	61.685	71.63	-25.842	51.685	0.2053	1	0.6505	nsig
Single_Model	TAG54:0-FA18:0	-0.343138	0.278628	-1.23153	0.218125		Anova	model.00	4	59.89	67.846	-25.945	51.89	model.01	5	60.349	70.294	-25.174	50.349	1.5414	1	0.2144	nsig
Single_Model	TAG54:1-FA16:0	0.0487823	0.304964	0.159961	0.872912		Anova	model.00	4	59.89	67.846	-25.945	51.89	model.01	5	61.864	71.809	-25.932	51.864	0.0257	1	0.8727	nsig
Single_Model	TAG54:1-FA18:0	0.106751	0.297396	0.358953	0.71963		Anova	model.00	4	59.89	67.846	-25.945	51.89	model.01	5	61.759	71.704	-25.88	51.759	0.1309	1	0.7175	nsig
Single_Model	TAG54:1-FA18:1	0.222145	0.314904	0.705439	0.480537		Anova	model.00	4	59.89	67.846	-25.945	51.89	model.01	5	61.366	71.311	-25.683	51.366	0.5236	1	0.4693	nsig
Single_Model	TAG54:1-FA20:0	-0.294185	0.283788	-1.03664	0.299905		Anova	model.00	4	59.89	67.846	-25.945	51.89	model.01	5	60.778	70.723	-25.389	50.778	1.1119	1	0.2917	nsig
Single_Model	TAG54:1-FA20:1	0.102618	0.28288	0.362762	0.716783		Anova	model.00	4	59.89	67.846	-25.945	51.89	model.01	5	61.756	71.701	-25.878	51.756	0.1336	1	0.7147	nsig
Single_Model	TAG54:2-FA16:0	-0.0655661	0.236788	-0.276898	0.781858		Anova	model.00	4	59.89	67.846	-25.945	51.89	model.01	5	61.813	71.758	-25.907	51.813	0.0767	1	0.7818	nsig
Single_Model	TAG54:2-FA18:0	-0.0330564	0.240348	-0.137536	0.890607		Anova	model.00	4	59.89	67.846	-25.945	51.89	model.01	5	61.871	71.816	-25.936	51.871	0.0189	1	0.8907	nsig
Single_Model	TAG54:2-FA18:1	0.00824055	0.219232	0.0375882	0.970016		Anova	model.00	4	59.89	67.846	-25.945	51.89	model.01	5	61.889	71.833	-25.944	51.889	0.0014	1	0.97	nsig
Single_Model	TAG54:2-FA18:2	-0.0918042	0.274632	-0.334281	0.738168		Anova	model.00	4	59.89	67.846	-25.945	51.89	model.01	5	61.778	71.723	-25.889	51.778	0.1115	1	0.7384	nsig
Single_Model	TAG54:2-FA20:0	-0.591862	0.47933	-1.23477	0.216917		Anova	model.00	4	59.89	67.846	-25.945	51.89	model.01	5	59.865	69.81	-24.932	49.865	2.0251	1	0.1547	nsig
Single_Model	TAG54:2-FA20:1	-0.0265959	0.221157	-0.120258	0.904279		Anova	model.00	4	59.89	67.846	-25.945	51.89	model.01	5	61.876	71.82	-25.938	51.876	0.0144	1	0.9043	nsig
Single_Model	TAG54:2-FA20:2	-0.179648	0.264064	-0.680318	0.496303		Anova	model.00	4	59.89	67.846	-25.945	51.89	model.01	5	61.42	71.365	-25.71	51.42	0.4701	1	0.4929	nsig
Single_Model	TAG54:3-FA16:0	-0.109098	0.219877	-0.496175	0.619771		Anova	model.00	4	59.89	67.846	-25.945	51.89	model.01	5	61.643	71.588	-25.821	51.643	0.2474	1	0.6189	nsig
Single_Model	TAG54:3-FA16:1	0.0175747	0.196517	0.0894308	0.92874		Anova	model.00	4	59.89	67.846	-25.945	51.89	model.01	5	61.882	71.827	-25.941	51.882	0.008	1	0.9287	nsig
Single_Model	TAG54:3-FA18:0	0.0176816	0.229677	0.0769848	0.938636		Anova	model.00	4	59.89	67.846	-25.945	51.89	model.01	5	61.884	71.829	-25.942	51.884	0.0059	1	0.9386	nsig
Single_Model	TAG54:3-FA18:1	0.0365414	0.203526	0.179541	0.857513		Anova	model.00	4	59.89	67.846	-25.945	51.89	model.01	5	61.858	71.802	-25.929	51.858	0.0324	1	0.8571	nsig
Single_Model	TAG54:3-FA18:2	-0.00438192	0.221567	-0.019777	0.984221		Anova	model.00	4	59.89	67.846	-25.945	51.89	model.01	5	61.89	71.835	-25.945	51.89	0.0004	1	0.9842	nsig
Single_Model	TAG54:3-FA20:1	-0.0819307	0.203599	-0.402411	0.687381		Anova	model.00	4	59.89	67.846	-25.945	51.89	model.01	5	61.726	71.671	-25.863	51.726	0.1638	1	0.6857	nsig
Single_Model	TAG54:3-FA20:2	-0.0543606	0.207112	-0.26247	0.792959		Anova	model.00	4	59.89	67.846	-25.945	51.89	model.01	5	61.821	71.766	-25.911	51.821	0.0688	1	0.7931	nsig
Single_Model	TAG54:3-FA20:3	-0.0778629	0.256243	-0.303864	0.761232		Anova	model.00	4	59.89	67.846	-25.945	51.89	model.01	5	61.797	71.742	-25.899	51.797	0.0925	1	0.761	nsig
Single_Model	TAG54:4-FA16:0	-0.0855462	0.20554	-0.416201	0.677263		Anova	model.00	4	59.89	67.846	-25.945	51.89	model.01	5	61.717	71.661	-25.858	51.717	0.1735	1	0.6771	nsig
Single_Model	TAG54:4-FA16:1	-0.0431239	0.182015	-0.236926	0.812714		Anova	model.00	4	59.89	67.846	-25.945	51.89	model.01	5	61.834	71.779	-25.917	51.834	0.0561	1	0.8128	nsig
Single_Model	TAG54:4-FA18:0	-0.0285311	0.229765	-0.124175	0.901177		Anova	model.00	4	59.89	67.846	-25.945	51.89	model.01	5	61.875	71.82	-25.937	51.875	0.0154	1	0.9013	nsig
Single_Model	TAG54:4-FA18:1	-0.0137649	0.20197	-0.0681533	0.945664		Anova	model.00	4	59.89	67.846	-25.945	51.89	model.01	5	61.885	71.83	-25.943	51.885	0.0046	1	0.9457	nsig
Single_Model	TAG54:4-FA18:2	-0.0185918	0.206897	-0.0898603	0.928398		Anova	model.00	4	59.89	67.846	-25.945	51.89	model.01	5	61.882	71.827	-25.941	51.882	0.0081	1	0.9285	nsig
Single_Model	TAG54:4-FA18:3	-0.0359192	0.206377	-0.174046	0.861829		Anova	model.00	4	59.89	67.846	-25.945	51.89	model.01	5	61.86	71.805	-25.93	51.86	0.0303	1	0.8619	nsig
Single_Model	TAG54:4-FA20:2	-0.125133	0.197207	-0.634525	0.525738		Anova	model.00	4	59.89	67.846	-25.945	51.89	model.01	5	61.482	71.427	-25.741	51.482	0.4079	1	0.523	nsig
Single_Model	TAG54:4-FA20:3	-0.00137862	0.197047	-0.00699637	0.994418		Anova	model.00	4	59.89	67.846	-25.945	51.89	model.01	5	61.89	71.835	-25.945	51.89	0	1	0.9944	nsig
Single_Model	TAG54:4-FA20:4	-0.0748958	0.243016	-0.308193	0.757936		Anova	model.00	4	59.89	67.846	-25.945	51.89	model.01	5	61.795	71.74	-25.898	51.795	0.095	1	0.758	nsig
Single_Model	TAG54:4-FA22:4	-0.119582	0.199157	-0.600442	0.548211		Anova	model.00	4	59.89	67.846	-25.945	51.89	model.01	5	61.523	71.467	-25.761	51.523	0.3675	1	0.5444	nsig
Single_Model	TAG54:5-FA16:0	0.194509	0.233177	0.834171	0.404185		Anova	model.00	4	59.89	67.846	-25.945	51.89	model.01	5	61.149	71.094	-25.575	51.149	0.7406	1	0.3895	nsig
Single_Model	TAG54:5-FA16:1	-0.0562183	0.184547	-0.304629	0.760649		Anova	model.00	4	59.89	67.846	-25.945	51.89	model.01	5	61.797	71.742	-25.899	51.797	0.0928	1	0.7606	nsig
Single_Model	TAG54:5-FA18:0	-0.0137307	0.195901	-0.0700902	0.944122		Anova	model.00	4	59.89	67.846	-25.945	51.89	model.01	5	61.885	71.83	-25.942	51.885	0.0049	1	0.9441	nsig
Single_Model	TAG54:5-FA18:1	0.00591455	0.2096	0.0282183	0.977488		Anova	model.00	4	59.89	67.846	-25.945	51.89	model.01	5	61.889	71.834	-25.945	51.889	0.0008	1	0.9775	nsig
Single_Model	TAG54:5-FA18:2	0.00503437	0.213914	0.0235346	0.981224		Anova	model.00	4	59.89	67.846	-25.945	51.89	model.01	5	61.889	71.834	-25.945	51.889	0.0006	1	0.9812	nsig
Single_Model	TAG54:5-FA18:3	0.0200014	0.208486	0.0959367	0.923571		Anova	model.00	4	59.89	67.846	-25.945	51.89	model.01	5	61.881	71.826	-25.94	51.881	0.0092	1	0.9235	nsig
Single_Model	TAG54:5-FA20:2	-0.0231138	0.205736	-0.112347	0.910548		Anova	model.00	4	59.89	67.846	-25.945	51.89	model.01	5	61.877	71.822	-25.939	51.877	0.0126	1	0.9106	nsig
Single_Model	TAG54:5-FA20:3	-0.0201812	0.195679	-0.103134	0.917857		Anova	model.00	4	59.89	67.846	-25.945	51.89	model.01	5	61.879	71.824	-25.94	51.879	0.0106	1	0.9179	nsig
Single_Model	TAG54:5-FA20:4	-0.0385081	0.187473	-0.205406	0.837255		Anova	model.00	4	59.89	67.846	-25.945	51.89	model.01	5	61.848	71.793	-25.924	51.848	0.0421	1	0.8375	nsig
Single_Model	TAG54:5-FA22:4	-0.0509495	0.174927	-0.291261	0.770852		Anova	model.00	4	59.89	67.846	-25.945	51.89	model.01	5	61.805	71.75	-25.903	51.805	0.0847	1	0.771	nsig
Single_Model	TAG54:5-FA22:5	-0.00312448	0.227366	-0.0137421	0.989036		Anova	model.00	4	59.89	67.846	-25.945	51.89	model.01	5	61.89	71.835	-25.945	51.89	0.0002	1	0.989	nsig
Single_Model	TAG54:6-FA16:1	-0.0219947	0.173372	-0.126864	0.899048		Anova	model.00	4	59.89	67.846	-25.945	51.89	model.01	5	61.874	71.819	-25.937	51.874	0.0161	1	0.8991	nsig
Single_Model	TAG54:6-FA18:1	0.0198217	0.20774	0.0954158	0.923985		Anova	model.00	4	59.89	67.846	-25.945	51.89	model.01	5	61.881	71.826	-25.94	51.881	0.0091	1	0.9239	nsig
Single_Model	TAG54:6-FA18:2	0.0197471	0.224504	0.0879586	0.92991		Anova	model.00	4	59.89	67.846	-25.945	51.89	model.01	5	61.882	71.827	-25.941	51.882	0.0078	1	0.9298	nsig
Single_Model	TAG54:6-FA18:3	0.0106634	0.213582	0.0499265	0.960181		Anova	model.00	4	59.89	67.846	-25.945	51.89	model.01	5	61.887	71.832	-25.944	51.887	0.0025	1	0.9602	nsig
Single_Model	TAG54:6-FA20:3	0.0682045	0.193615	0.352269	0.724637		Anova	model.00	4	59.89	67.846	-25.945	51.89	model.01	5	61.764	71.709	-25.882	51.764	0.1255	1	0.7231	nsig
Single_Model	TAG54:6-FA20:4	-0.541055	0.562136	-0.962499	0.335799		Anova	model.00	4	59.89	67.846	-25.945	51.89	model.01	5	62.009	71.953	-26.004	52.009	0	1	1	nsig
Single_Model	TAG54:6-FA20:5	0.0719269	0.19622	0.366562	0.713946		Anova	model.00	4	59.89	67.846	-25.945	51.89	model.01	5	61.755	71.699	-25.877	51.755	0.1355	1	0.7128	nsig
Single_Model	TAG54:6-FA22:5	0.101758	0.183653	0.554079	0.579525		Anova	model.00	4	59.89	67.846	-25.945	51.89	model.01	5	61.576	71.521	-25.788	51.576	0.3144	1	0.575	nsig
Single_Model	TAG54:6-FA22:6	0.0270593	0.236631	0.114352	0.908959		Anova	model.00	4	59.89	67.846	-25.945	51.89	model.01	5	61.877	71.822	-25.938	51.877	0.0131	1	0.9088	nsig
Single_Model	TAG54:7-FA18:1	0.0743601	0.20947	0.354992	0.722595		Anova	model.00	4	59.89	67.846	-25.945	51.89	model.01	5	61.763	71.708	-25.881	51.763	0.1273	1	0.7213	nsig
Single_Model	TAG54:7-FA18:2	0.0355138	0.217769	0.16308	0.870455		Anova	model.00	4	59.89	67.846	-25.945	51.89	model.01	5	61.863	71.808	-25.932	51.863	0.0268	1	0.8701	nsig
Single_Model	TAG54:7-FA18:3	0.0416377	0.202881	0.205232	0.837391		Anova	model.00	4	59.89	67.846	-25.945	51.89	model.01	5	61.848	71.793	-25.924	51.848	0.0424	1	0.8369	nsig
Single_Model	TAG54:7-FA20:4	-0.0568594	0.180376	-0.315227	0.75259		Anova	model.00	4	59.89	67.846	-25.945	51.89	model.01	5	61.791	71.736	-25.895	51.791	0.0992	1	0.7528	nsig
Single_Model	TAG54:7-FA20:5	0.0386603	0.204869	0.188707	0.850322		Anova	model.00	4	59.89	67.846	-25.945	51.89	model.01	5	61.854	71.799	-25.927	51.854	0.0358	1	0.8499	nsig
Single_Model	TAG54:7-FA22:6	-0.0427947	0.171828	-0.249055	0.803318		Anova	model.00	4	59.89	67.846	-25.945	51.89	model.01	5	61.828	71.773	-25.914	51.828	0.062	1	0.8034	nsig
Single_Model	TAG55:1-FA18:1	-0.106514	0.274577	-0.387921	0.698075		Anova	model.00	4	59.89	67.846	-25.945	51.89	model.01	5	61.738	71.683	-25.869	51.738	0.1519	1	0.6967	nsig
Single_Model	TAG55:2-FA18:1	0.159824	0.254762	0.627345	0.530433		Anova	model.00	4	59.89	67.846	-25.945	51.89	model.01	5	61.485	71.43	-25.742	51.485	0.4052	1	0.5244	nsig
Single_Model	TAG55:2-FA18:2	-0.289621	0.28577	-1.01348	0.310833		Anova	model.00	4	59.89	67.846	-25.945	51.89	model.01	5	60.816	70.76	-25.408	50.816	1.0744	1	0.2999	nsig
Single_Model	TAG55:3-FA18:1	0.307232	0.25233	1.21758	0.223383		Anova	model.00	4	59.89	67.846	-25.945	51.89	model.01	5	60.242	70.187	-25.121	50.242	1.6482	1	0.1992	nsig
Single_Model	TAG55:3-FA18:2	-0.026973	0.218188	-0.123623	0.901614		Anova	model.00	4	59.89	67.846	-25.945	51.89	model.01	5	61.875	71.82	-25.937	51.875	0.0153	1	0.9016	nsig
Single_Model	TAG55:4-FA18:1	0.269087	0.256052	1.05091	0.293301		Anova	model.00	4	59.89	67.846	-25.945	51.89	model.01	5	60.673	70.618	-25.337	50.673	1.2169	1	0.27	nsig
Single_Model	TAG55:4-FA18:2	0.017353	0.211445	0.0820689	0.934592		Anova	model.00	4	59.89	67.846	-25.945	51.89	model.01	5	61.883	71.828	-25.942	51.883	0.0067	1	0.9346	nsig
Single_Model	TAG55:5-FA18:1	0.498944	0.308076	1.61955	0.105329		Anova	model.00	4	59.89	67.846	-25.945	51.89	model.01	5	58.82	68.765	-24.41	48.82	3.0701	1	0.07974	nsig
Single_Model	TAG55:5-FA18:2	0.0731493	0.221176	0.330729	0.740849		Anova	model.00	4	59.89	67.846	-25.945	51.89	model.01	5	61.779	71.724	-25.89	51.779	0.1107	1	0.7393	nsig
Single_Model	TAG55:5-FA20:4	0.0769736	0.220093	0.349732	0.72654		Anova	model.00	4	59.89	67.846	-25.945	51.89	model.01	5	61.766	71.711	-25.883	51.766	0.1242	1	0.7245	nsig
Single_Model	TAG55:7-FA22:6	0.0138845	0.208097	0.0667211	0.946804		Anova	model.00	4	59.89	67.846	-25.945	51.89	model.01	5	61.886	71.83	-25.943	51.886	0.0045	1	0.9467	nsig
Single_Model	TAG56:10-FA18:2	0.0923793	0.246752	0.374381	0.708121		Anova	model.00	4	59.89	67.846	-25.945	51.89	model.01	5	61.747	71.692	-25.874	51.747	0.1427	1	0.7056	nsig
Single_Model	TAG56:1-FA16:0	-0.158961	0.415454	-0.38262	0.702002		Anova	model.00	4	59.89	67.846	-25.945	51.89	model.01	5	61.744	71.689	-25.872	51.744	0.1461	1	0.7023	nsig
Single_Model	TAG56:1-FA18:1	-0.225938	0.38924	-0.58046	0.561604		Anova	model.00	4	59.89	67.846	-25.945	51.89	model.01	5	61.554	71.499	-25.777	51.554	0.3363	1	0.562	nsig
Single_Model	TAG56:2-FA16:0	-0.227953	0.27065	-0.842244	0.399651		Anova	model.00	4	59.89	67.846	-25.945	51.89	model.01	5	61.146	71.091	-25.573	51.146	0.7439	1	0.3884	nsig
Single_Model	TAG56:2-FA18:0	-0.00642267	0.293957	-0.021849	0.982568		Anova	model.00	4	59.89	67.846	-25.945	51.89	model.01	5	61.89	71.834	-25.945	51.89	0.0005	1	0.9826	nsig
Single_Model	TAG56:2-FA20:0	-0.125235	0.292882	-0.427596	0.668945		Anova	model.00	4	59.89	67.846	-25.945	51.89	model.01	5	61.707	71.652	-25.854	51.707	0.1827	1	0.669	nsig
Single_Model	TAG56:2-FA20:1	0.171754	0.271048	0.633665	0.5263		Anova	model.00	4	59.89	67.846	-25.945	51.89	model.01	5	61.475	71.42	-25.738	51.475	0.4149	1	0.5195	nsig
Single_Model	TAG56:3-FA16:0	-0.493445	0.412406	-1.1965	0.231501		Anova	model.00	4	59.89	67.846	-25.945	51.89	model.01	5	59.694	69.639	-24.847	49.694	2.1957	1	0.1384	nsig
Single_Model	TAG56:3-FA18:0	-0.022961	0.276587	-0.0830156	0.933839		Anova	model.00	4	59.89	67.846	-25.945	51.89	model.01	5	61.883	71.828	-25.942	51.883	0.0069	1	0.9339	nsig
Single_Model	TAG56:3-FA18:1	0.1962	0.261411	0.750544	0.452927		Anova	model.00	4	59.89	67.846	-25.945	51.89	model.01	5	61.299	71.244	-25.649	51.299	0.591	1	0.442	nsig
Single_Model	TAG56:3-FA18:2	-0.00279671	0.245302	-0.011401	0.990904		Anova	model.00	4	59.89	67.846	-25.945	51.89	model.01	5	61.89	71.835	-25.945	51.89	0.0001	1	0.9909	nsig
Single_Model	TAG56:3-FA20:0	-0.0109891	0.270829	-0.0405758	0.967634		Anova	model.00	4	59.89	67.846	-25.945	51.89	model.01	5	61.888	71.833	-25.944	51.888	0.0016	1	0.9676	nsig
Single_Model	TAG56:3-FA20:1	0.0793394	0.229306	0.345997	0.729345		Anova	model.00	4	59.89	67.846	-25.945	51.89	model.01	5	61.769	71.714	-25.884	51.769	0.1212	1	0.7277	nsig
Single_Model	TAG56:3-FA20:2	-0.0349169	0.212703	-0.164158	0.869606		Anova	model.00	4	59.89	67.846	-25.945	51.89	model.01	5	61.863	71.808	-25.931	51.863	0.027	1	0.8695	nsig
Single_Model	TAG56:4-FA16:0	-0.130524	0.213277	-0.611994	0.540541		Anova	model.00	4	59.89	67.846	-25.945	51.89	model.01	5	61.509	71.454	-25.754	51.509	0.3812	1	0.5369	nsig
Single_Model	TAG56:4-FA18:0	0.0194052	0.255603	0.0759195	0.939483		Anova	model.00	4	59.89	67.846	-25.945	51.89	model.01	5	61.884	71.829	-25.942	51.884	0.0058	1	0.9394	nsig
Single_Model	TAG56:4-FA18:1	0.0575857	0.212931	0.270443	0.78682		Anova	model.00	4	59.89	67.846	-25.945	51.89	model.01	5	61.816	71.761	-25.908	51.816	0.0738	1	0.7858	nsig
Single_Model	TAG56:4-FA18:2	0.00818174	0.214231	0.0381912	0.969535		Anova	model.00	4	59.89	67.846	-25.945	51.89	model.01	5	61.889	71.833	-25.944	51.889	0.0015	1	0.9695	nsig
Single_Model	TAG56:4-FA20:1	0.0436923	0.220963	0.197736	0.843252		Anova	model.00	4	59.89	67.846	-25.945	51.89	model.01	5	61.851	71.796	-25.925	51.851	0.0393	1	0.8428	nsig
Single_Model	TAG56:4-FA20:2	0.0276771	0.213395	0.129699	0.896805		Anova	model.00	4	59.89	67.846	-25.945	51.89	model.01	5	61.873	71.818	-25.937	51.873	0.0169	1	0.8966	nsig
Single_Model	TAG56:4-FA20:3	0.0463496	0.211376	0.219276	0.826435		Anova	model.00	4	59.89	67.846	-25.945	51.89	model.01	5	61.842	71.787	-25.921	51.842	0.0482	1	0.8262	nsig
Single_Model	TAG56:4-FA20:4	-0.0844422	0.266015	-0.317433	0.750915		Anova	model.00	4	59.89	67.846	-25.945	51.89	model.01	5	61.788	71.733	-25.894	51.788	0.1019	1	0.7495	nsig
Single_Model	TAG56:4-FA22:4	-0.650558	0.469773	-1.38483	0.166103		Anova	model.00	4	59.89	67.846	-25.945	51.89	model.01	5	60.55	70.495	-25.275	50.55	1.3396	1	0.2471	nsig
Single_Model	TAG56:5-FA18:1	-0.000208806	0.196399	-0.00106317	0.999152		Anova	model.00	4	59.89	67.846	-25.945	51.89	model.01	5	61.89	71.835	-25.945	51.89	0	1	0.9992	nsig
Single_Model	TAG56:5-FA18:2	-0.0217376	0.214463	-0.101358	0.919266		Anova	model.00	4	59.89	67.846	-25.945	51.89	model.01	5	61.88	71.825	-25.94	51.88	0.0103	1	0.9193	nsig
Single_Model	TAG56:5-FA20:1	-0.0997326	0.201669	-0.494535	0.620928		Anova	model.00	4	59.89	67.846	-25.945	51.89	model.01	5	61.645	71.589	-25.822	51.645	0.2454	1	0.6203	nsig
Single_Model	TAG56:5-FA20:2	-0.0439758	0.199856	-0.220037	0.825842		Anova	model.00	4	59.89	67.846	-25.945	51.89	model.01	5	61.842	71.787	-25.921	51.842	0.0484	1	0.8259	nsig
Single_Model	TAG56:5-FA20:3	0.0172479	0.205999	0.0837284	0.933272		Anova	model.00	4	59.89	67.846	-25.945	51.89	model.01	5	61.883	71.828	-25.942	51.883	0.007	1	0.9332	nsig
Single_Model	TAG56:5-FA20:4	0.00227791	0.235124	0.00968811	0.99227		Anova	model.00	4	59.89	67.846	-25.945	51.89	model.01	5	61.89	71.835	-25.945	51.89	0.0001	1	0.9923	nsig
Single_Model	TAG56:5-FA22:4	-0.554669	0.480461	-1.15445	0.248315		Anova	model.00	4	59.89	67.846	-25.945	51.89	model.01	5	61.427	71.372	-25.713	51.427	0.4632	1	0.4961	nsig
Single_Model	TAG56:5-FA22:5	0.0642705	0.246893	0.260317	0.794619		Anova	model.00	4	59.89	67.846	-25.945	51.89	model.01	5	61.822	71.767	-25.911	51.822	0.0684	1	0.7937	nsig
Single_Model	TAG56:6-FA18:1	0.0505314	0.198716	0.254289	0.799272		Anova	model.00	4	59.89	67.846	-25.945	51.89	model.01	5	61.825	71.77	-25.912	51.825	0.0653	1	0.7983	nsig
Single_Model	TAG56:6-FA18:2	-0.00589364	0.205479	-0.0286824	0.977118		Anova	model.00	4	59.89	67.846	-25.945	51.89	model.01	5	61.889	71.834	-25.945	51.889	0.0008	1	0.9771	nsig
Single_Model	TAG56:6-FA20:2	-0.121574	0.193326	-0.628858	0.529442		Anova	model.00	4	59.89	67.846	-25.945	51.89	model.01	5	61.492	71.437	-25.746	51.492	0.3976	1	0.5283	nsig
Single_Model	TAG56:6-FA20:3	0.0227644	0.203112	0.112078	0.910762		Anova	model.00	4	59.89	67.846	-25.945	51.89	model.01	5	61.877	71.822	-25.939	51.877	0.0126	1	0.9106	nsig
Single_Model	TAG56:6-FA20:4	0.0141425	0.215931	0.0654954	0.94778		Anova	model.00	4	59.89	67.846	-25.945	51.89	model.01	5	61.886	71.831	-25.943	51.886	0.0043	1	0.9477	nsig
Single_Model	TAG56:6-FA20:5	0.316589	0.272851	1.1603	0.245926		Anova	model.00	4	59.89	67.846	-25.945	51.89	model.01	5	60.386	70.331	-25.193	50.386	1.5036	1	0.2201	nsig
Single_Model	TAG56:6-FA22:4	-0.0983326	0.186467	-0.527346	0.597953		Anova	model.00	4	59.89	67.846	-25.945	51.89	model.01	5	61.61	71.555	-25.805	51.61	0.2799	1	0.5968	nsig
Single_Model	TAG56:6-FA22:5	0.157819	0.21027	0.750552	0.452922		Anova	model.00	4	59.89	67.846	-25.945	51.89	model.01	5	61.296	71.241	-25.648	51.296	0.5942	1	0.4408	nsig
Single_Model	TAG56:6-FA22:6	0.117328	0.259763	0.451675	0.651503		Anova	model.00	4	59.89	67.846	-25.945	51.89	model.01	5	61.682	71.627	-25.841	51.682	0.2084	1	0.6481	nsig
Single_Model	TAG56:7-FA16:0	-1.05083	0.598398	-1.75608	0.0790751		Anova	model.00	4	59.89	67.846	-25.945	51.89	model.01	5	59.865	69.81	-24.933	49.865	2.0248	1	0.1548	nsig
Single_Model	TAG56:7-FA18:0	-0.15263	0.302391	-0.504741	0.613741		Anova	model.00	4	59.89	67.846	-25.945	51.89	model.01	5	61.633	71.578	-25.817	51.633	0.2567	1	0.6124	nsig
Single_Model	TAG56:7-FA18:1	0.00370461	0.206705	0.0179222	0.985701		Anova	model.00	4	59.89	67.846	-25.945	51.89	model.01	5	61.89	71.835	-25.945	51.89	0.0003	1	0.9857	nsig
Single_Model	TAG56:7-FA18:2	-0.000380544	0.204656	-0.00185943	0.998516		Anova	model.00	4	59.89	67.846	-25.945	51.89	model.01	5	61.89	71.835	-25.945	51.89	0	1	0.9985	nsig
Single_Model	TAG56:7-FA20:3	-0.0486307	0.209177	-0.232487	0.81616		Anova	model.00	4	59.89	67.846	-25.945	51.89	model.01	5	61.836	71.781	-25.918	51.836	0.054	1	0.8163	nsig
Single_Model	TAG56:7-FA20:4	-0.0663625	0.217132	-0.305632	0.759885		Anova	model.00	4	59.89	67.846	-25.945	51.89	model.01	5	61.797	71.742	-25.898	51.797	0.0931	1	0.7603	nsig
Single_Model	TAG56:7-FA20:5	0.27345	0.25991	1.05209	0.292757		Anova	model.00	4	59.89	67.846	-25.945	51.89	model.01	5	60.674	70.619	-25.337	50.674	1.2159	1	0.2702	nsig
Single_Model	TAG56:7-FA22:5	0.0474689	0.199538	0.237894	0.811964		Anova	model.00	4	59.89	67.846	-25.945	51.89	model.01	5	61.833	71.778	-25.916	51.833	0.0572	1	0.811	nsig
Single_Model	TAG56:7-FA22:6	0.0174291	0.198158	0.0879555	0.929912		Anova	model.00	4	59.89	67.846	-25.945	51.89	model.01	5	61.882	71.827	-25.941	51.882	0.0078	1	0.9298	nsig
Single_Model	TAG56:8-FA16:0	-1.01193	0.565241	-1.79027	0.0734106		Anova	model.00	4	59.89	67.846	-25.945	51.89	model.01	5	59.162	69.107	-24.581	49.162	2.7282	1	0.09859	nsig
Single_Model	TAG56:8-FA18:1	-0.011134	0.267108	-0.0416836	0.966751		Anova	model.00	4	59.89	67.846	-25.945	51.89	model.01	5	61.888	71.833	-25.944	51.888	0.0017	1	0.9667	nsig
Single_Model	TAG56:8-FA18:2	-0.0322992	0.205114	-0.157469	0.874875		Anova	model.00	4	59.89	67.846	-25.945	51.89	model.01	5	61.865	71.81	-25.933	51.865	0.0248	1	0.8749	nsig
Single_Model	TAG56:8-FA20:4	0.241256	0.325432	0.741342	0.458486		Anova	model.00	4	59.89	67.846	-25.945	51.89	model.01	5	61.314	71.259	-25.657	51.314	0.5761	1	0.4478	nsig
Single_Model	TAG56:8-FA20:5	0.191152	0.226556	0.843729	0.398821		Anova	model.00	4	59.89	67.846	-25.945	51.89	model.01	5	61.15	71.095	-25.575	51.15	0.74	1	0.3897	nsig
Single_Model	TAG56:8-FA22:6	-0.0687079	0.195258	-0.351882	0.724927		Anova	model.00	4	59.89	67.846	-25.945	51.89	model.01	5	61.767	71.712	-25.883	51.767	0.1233	1	0.7255	nsig
Single_Model	TAG56:9-FA20:5	0.395742	0.294661	1.34304	0.179259		Anova	model.00	4	59.89	67.846	-25.945	51.89	model.01	5	59.836	69.781	-24.918	49.836	2.0542	1	0.1518	nsig
Single_Model	TAG56:9-FA22:6	-0.0394087	0.19743	-0.199608	0.841787		Anova	model.00	4	59.89	67.846	-25.945	51.89	model.01	5	61.85	71.795	-25.925	51.85	0.0398	1	0.8419	nsig
Single_Model	TAG57:2-FA18:1	-0.096757	0.267316	-0.361957	0.717384		Anova	model.00	4	59.89	67.846	-25.945	51.89	model.01	5	61.759	71.704	-25.879	51.759	0.1313	1	0.7171	nsig
Single_Model	TAG57:3-FA18:2	-0.444083	0.450823	-0.98505	0.324599		Anova	model.00	4	59.89	67.846	-25.945	51.89	model.01	5	60.794	70.738	-25.397	50.794	1.0965	1	0.295	nsig
Single_Model	TAG58:10-FA18:2	-0.540511	0.405145	-1.33412	0.182165		Anova	model.00	4	59.89	67.846	-25.945	51.89	model.01	5	60.243	70.188	-25.122	50.243	1.6465	1	0.1994	nsig
Single_Model	TAG58:10-FA20:4	-0.601926	0.470676	-1.27885	0.200949		Anova	model.00	4	59.89	67.846	-25.945	51.89	model.01	5	60.735	70.68	-25.367	50.735	1.155	1	0.2825	nsig
Single_Model	TAG58:10-FA22:6	-0.0724264	0.202497	-0.357667	0.720592		Anova	model.00	4	59.89	67.846	-25.945	51.89	model.01	5	61.762	71.707	-25.881	51.762	0.1275	1	0.721	nsig
Single_Model	TAG58:2-FA18:1	0.133786	0.287859	0.464763	0.642101		Anova	model.00	4	59.89	67.846	-25.945	51.89	model.01	5	61.674	71.619	-25.837	51.674	0.2156	1	0.6424	nsig
Single_Model	TAG58:3-FA18:1	0.0484534	0.247242	0.195976	0.844629		Anova	model.00	4	59.89	67.846	-25.945	51.89	model.01	5	61.851	71.796	-25.926	51.851	0.0385	1	0.8444	nsig
Single_Model	TAG58:5-FA18:1	-0.0538919	0.205696	-0.261997	0.793323		Anova	model.00	4	59.89	67.846	-25.945	51.89	model.01	5	61.821	71.766	-25.911	51.821	0.0687	1	0.7932	nsig
Single_Model	TAG58:6-FA18:1	-0.0383536	0.180881	-0.212037	0.832078		Anova	model.00	4	59.89	67.846	-25.945	51.89	model.01	5	61.845	71.79	-25.922	51.845	0.045	1	0.8321	nsig
Single_Model	TAG58:6-FA20:4	-0.13331	0.260854	-0.511051	0.609315		Anova	model.00	4	59.89	67.846	-25.945	51.89	model.01	5	61.63	71.575	-25.815	51.63	0.2601	1	0.6101	nsig
Single_Model	TAG58:6-FA22:4	-0.606883	0.556045	-1.09143	0.275084		Anova	model.00	4	59.89	67.846	-25.945	51.89	model.01	5	61.389	71.334	-25.695	51.389	0.501	1	0.479	nsig
Single_Model	TAG58:6-FA22:5	0.0987048	0.246709	0.400086	0.689093		Anova	model.00	4	59.89	67.846	-25.945	51.89	model.01	5	61.726	71.671	-25.863	51.726	0.1636	1	0.6859	nsig
Single_Model	TAG58:7-FA18:0	-0.078907	0.26249	-0.300609	0.763712		Anova	model.00	4	59.89	67.846	-25.945	51.89	model.01	5	61.799	71.744	-25.899	51.799	0.0911	1	0.7627	nsig
Single_Model	TAG58:7-FA18:1	0.0240136	0.205905	0.116625	0.907157		Anova	model.00	4	59.89	67.846	-25.945	51.89	model.01	5	61.876	71.821	-25.938	51.876	0.0136	1	0.907	nsig
Single_Model	TAG58:7-FA18:2	-0.0452302	0.187844	-0.240786	0.809721		Anova	model.00	4	59.89	67.846	-25.945	51.89	model.01	5	61.832	71.777	-25.916	51.832	0.0579	1	0.8098	nsig
Single_Model	TAG58:7-FA20:4	-0.578099	0.493327	-1.17184	0.241263		Anova	model.00	4	59.89	67.846	-25.945	51.89	model.01	5	60.899	70.844	-25.449	50.899	0.9913	1	0.3194	nsig
Single_Model	TAG58:7-FA22:4	-0.91811	0.491231	-1.869	0.061623		Anova	model.00	4	59.89	67.846	-25.945	51.89	model.01	5	58.98	68.925	-24.49	48.98	2.9102	1	0.08802	nsig
Single_Model	TAG58:7-FA22:5	-0.0210361	0.214848	-0.0979116	0.922002		Anova	model.00	4	59.89	67.846	-25.945	51.89	model.01	5	61.88	71.825	-25.94	51.88	0.0096	1	0.9221	nsig
Single_Model	TAG58:7-FA22:6	0.121057	0.246926	0.490257	0.623952		Anova	model.00	4	59.89	67.846	-25.945	51.89	model.01	5	61.642	71.587	-25.821	51.642	0.2476	1	0.6187	nsig
Single_Model	TAG58:8-FA18:1	-0.0391945	0.237671	-0.164911	0.869014		Anova	model.00	4	59.89	67.846	-25.945	51.89	model.01	5	61.863	71.808	-25.931	51.863	0.0272	1	0.8689	nsig
Single_Model	TAG58:8-FA18:2	-0.67905	0.439384	-1.54546	0.122236		Anova	model.00	4	59.89	67.846	-25.945	51.89	model.01	5	60.446	70.391	-25.223	50.446	1.4436	1	0.2296	nsig
Single_Model	TAG58:8-FA20:3	0.101287	0.247938	0.408518	0.682893		Anova	model.00	4	59.89	67.846	-25.945	51.89	model.01	5	61.72	71.665	-25.86	51.72	0.1703	1	0.6798	nsig
Single_Model	TAG58:8-FA20:4	-1.01554	0.604441	-1.68012	0.0929333		Anova	model.00	4	59.89	67.846	-25.945	51.89	model.01	5	59.923	69.868	-24.962	49.923	1.9669	1	0.1608	nsig
Single_Model	TAG58:8-FA22:5	0.041373	0.221479	0.186803	0.851815		Anova	model.00	4	59.89	67.846	-25.945	51.89	model.01	5	61.855	71.8	-25.927	51.855	0.0352	1	0.8512	nsig
Single_Model	TAG58:8-FA22:6	-0.617833	0.487163	-1.26823	0.204717		Anova	model.00	4	59.89	67.846	-25.945	51.89	model.01	5	61.325	71.27	-25.662	51.325	0.5653	1	0.4521	nsig
Single_Model	TAG58:9-FA18:1	-0.127894	0.267488	-0.478129	0.632558		Anova	model.00	4	59.89	67.846	-25.945	51.89	model.01	5	61.66	71.605	-25.83	51.66	0.2299	1	0.6316	nsig
Single_Model	TAG58:9-FA18:2	-0.613287	0.491276	-1.24835	0.211901		Anova	model.00	4	59.89	67.846	-25.945	51.89	model.01	5	60.824	70.769	-25.412	50.824	1.0659	1	0.3019	nsig
Single_Model	TAG58:9-FA20:4	-0.0571805	0.229574	-0.249072	0.803305		Anova	model.00	4	59.89	67.846	-25.945	51.89	model.01	5	61.828	71.773	-25.914	51.828	0.062	1	0.8033	nsig
Single_Model	TAG58:9-FA22:5	-0.0436825	0.202344	-0.215883	0.829079		Anova	model.00	4	59.89	67.846	-25.945	51.89	model.01	5	61.844	71.788	-25.922	51.844	0.0464	1	0.8294	nsig
Single_Model	TAG58:9-FA22:6	-0.713112	0.475776	-1.49884	0.133915		Anova	model.00	4	59.89	67.846	-25.945	51.89	model.01	5	60.923	70.868	-25.462	50.923	0.9668	1	0.3255	nsig
