# Supplementary material for: Multi-omic Analysis of Familial Adenomatous Polyposis Reveals Molecular Pathways and Polyclonal Spreading Associated with Early Tumorigenesis
Source: Research Square preprint supplement (doi:10.21203/rs.3.rs-515393/v1), 2021-05-19
Supplement: Supplementary file 9 [file 7345353cda6b941d1cb9e1c2.xlsx]

## Sheet: Supplemental Data 8
						M -> B		M -> D		B -> D		M -> A		B -> A		D -> A
Key	Name	ExtID	Database	Omic	Alg	U	D	U	D	U	D	U	D	U	D	U	D
1	14-3-3-mediated Signaling		ipa	prot	ipa				1.51
1	14-3-3-mediated Signaling		ipa	rna	ipa		1.31		1.32					3.71		1.67
2	1D-myo-inositol Hexakisphosphate Biosynthesis II (Mammalian)		ipa	rna	ipa									1.62
3	3-phosphoinositide Biosynthesis		ipa	rna	ipa							2.27		3.8		1.48
4	3-phosphoinositide Degradation		ipa	rna	ipa									3.16
5	ABC transporters in lipid homeostasis	R-HSA-1369062	Reactome	lipid	ORA	3.51999		3.36051		3.16494
6	ABC-family proteins mediated transport	R-HSA-382556	Reactome	lipid	ORA	3.09259		2.92082		2.70997
7	ABC-family proteins mediated transport	WP1780	Wikipathway	lipid	ORA	3.05651		2.87943		2.66959
8	Acetaminophen Action Pathway	SMP00710	SMPDB	lipid	ORA	2.05159		1.89963		1.7122
9	Acetone Degradation I (to Methylglyoxal)		ipa	rna	ipa	1.92		1.96			1.38
10	Acetylsalicylic Acid Action Pathway	SMP00083	SMPDB	lipid	ORA	2.05159		1.89963		1.7122
11	Actin Cytoskeleton Signaling		ipa	rna	ipa		4.16		2.86	1.38				4.79		1.7
11	Actin Cytoskeleton Signaling		ipa	prot	ipa		1.53		3.94
12	Actin Nucleation by ARP-WASP Complex		ipa	prot	ipa				1.53
12	Actin Nucleation by ARP-WASP Complex		ipa	rna	ipa		1.43						3.14		1.97		1.74
13	Activation of IRF by Cytosolic Pattern Recognition Receptors		ipa	rna	ipa									1.44		2.45
14	Acute Myeloid Leukemia Signaling		ipa	rna	ipa		1.43			1.44				2.31
15	Acute Phase Response Signaling		ipa	rna	ipa		2.57			1.64				1.77
15	Acute Phase Response Signaling		ipa	prot	ipa		23.6		35.4
16	Acyl chain remodeling of CL	R-HSA-1482798	Reactome	lipid	ORA	3.44733		5.21467		4.87943
17	Acyl chain remodelling of PC	R-HSA-1482788	Reactome	lipid	ORA	3.51999		3.36051		3.16494
18	Acyl chain remodelling of PE	R-HSA-1482839	Reactome	lipid	ORA			3.4318		3.24718
19	acyl-CoA hydrolysis	PWY-5148	HUMCYC	lipid	ORA					2.33724
20	Acyl-CoA Hydrolysis		ipa	rna	ipa								1.92		2.5		1.31
21	Acylglycerol degradation	mod:hsa_M00098	KEGG	metab	TOPO	1.41908
22	Adaptive Immune System	R-HSA-1280218	Reactome	lipid	ORA			3.7122		3.42251
23	Adherens junction	path:hsa04520	KEGG	metab	TOPO			1.36151		1.47625
24	Adipocytokine signaling pathway	path:hsa04920	KEGG	lipid	ORA			3.61439		3.4318
24	Adipocytokine signaling pathway	path:hsa04920	KEGG	metab	TOPO	1.93181		2.098		5.31605
25	Adipogenesis pathway		ipa	rna	ipa							6.25		8.92		6.55
26	Adrenergic signaling in cardiomyocytes	path:hsa04261	KEGG	metab	TOPO			1.66756		1.48545
27	Adrenomedullin signaling pathway		ipa	prot	ipa				1.55
27	Adrenomedullin signaling pathway		ipa	rna	ipa		4.14		5.11					3.45		3.38
28	AGE-RAGE signaling pathway in diabetic complications	path:hsa04933	KEGG	lipid	ORA			3.36051		3.16494
28	AGE-RAGE signaling pathway in diabetic complications	path:hsa04933	KEGG	metab	TOPO	5.31605		5.31605		5.31605
29	Agranulocyte Adhesion and Diapedesis		ipa	rna	ipa	5.71	11.8	8.25	6.2	1.56	1.55
29	Agranulocyte Adhesion and Diapedesis		ipa	prot	ipa	1.39	1.91		7.33
30	Agrin Interactions at Neuromuscular Junction		ipa	rna	ipa		1.55		1.49
31	Airway Inflammation in Asthma		ipa	prot	ipa			1.36
31	Airway Inflammation in Asthma		ipa	rna	ipa			1.92
32	Airway Pathology in Chronic Obstructive Pulmonary Disease		ipa	prot	ipa		2.55	1.45	2.65
32	Airway Pathology in Chronic Obstructive Pulmonary Disease		ipa	rna	ipa	4.82	1.58	7.6	1.57
33	Alanine Biosynthesis II		ipa	prot	ipa			1.68
33	Alanine Biosynthesis II		ipa	rna	ipa			1.53
34	Alanine Degradation III		ipa	prot	ipa			1.68
34	Alanine Degradation III		ipa	rna	ipa			1.53
35	Alcoholism	path:hsa05034	KEGG	metab	TOPO					3.17914
36	Aldosterone Signaling in Epithelial Cells		ipa	prot	ipa		1.39		1.39
36	Aldosterone Signaling in Epithelial Cells		ipa	rna	ipa				1.36			2.68		3.56		1.84
37	Aldosterone-regulated sodium reabsorption	path:hsa04960	KEGG	metab	TOPO			2.07831
38	Allograft Rejection Signaling		ipa	prot	ipa				3.08
38	Allograft Rejection Signaling		ipa	rna	ipa		7.37		2.83
39	Alpha Linolenic Acid and Linoleic Acid Metabolism	SMP0000018	SMPDB	lipid	ORA					3.03105
39	Alpha Linolenic Acid and Linoleic Acid Metabolism	SMP0000018	SMPDB	metab	MSEA	2.6038		2.41341
40	alpha-Linolenic acid metabolism	path:hsa00592	KEGG	lipid	ORA					2.05159
41	Altered T Cell and B Cell Signaling in Rheumatoid Arthritis		ipa	rna	ipa		14.1		6.36	1.43
42	Ammonia Recycling	SMP0000009	SMPDB	metab	MSEA			3.56067
43	Amoebiasis	path:hsa05146	KEGG	metab	TOPO	5.31605		5.31605
44	AMPK Signaling		ipa	rna	ipa									2.31		1.56
45	Amyotrophic lateral sclerosis	path:hsa05014	KEGG	metab	TOPO			1.40561
46	Amyotrophic Lateral Sclerosis Signaling		ipa	rna	ipa		2.83		3.16			2.28		3.9		4.66
47	Androgen and Estrogen Metabolism	SMP0000068	SMPDB	metab	MSEA			3.38195
48	Androgen Biosynthesis		ipa	rna	ipa										1.51
49	Androgen Signaling		ipa	prot	ipa				2.7
49	Androgen Signaling		ipa	rna	ipa				1.37					2.71		1.65
50	Angiopoietin Signaling		ipa	rna	ipa		2.04							4.11		2.4
51	Antigen Presentation Pathway		ipa	prot	ipa				2.3
51	Antigen Presentation Pathway		ipa	rna	ipa		6.82		2.17				3.9
52	Antigen processing and presentation	path:hsa04612	KEGG	metab	TOPO	3.02641		5.31605		3.14874
53	Antioxidant Action of Vitamin C		ipa	rna	ipa				1.85					1.72		2.23
54	Antiproliferative Role of Somatostatin Receptor 2		ipa	prot	ipa				2.77
54	Antiproliferative Role of Somatostatin Receptor 2		ipa	rna	ipa		3.19		3.35					1.8
55	Antipyrine Action Pathway	SMP00692	SMPDB	lipid	ORA	2.05159		1.89963		1.7122
56	Antrafenine Action Pathway	SMP00693	SMPDB	lipid	ORA	2.05159		1.89963		1.7122
57	Apelin Adipocyte Signaling Pathway		ipa	prot	ipa		2.71		1.5
57	Apelin Adipocyte Signaling Pathway		ipa	rna	ipa		2.07		1.77
58	Apelin Cardiac Fibroblast Signaling Pathway		ipa	rna	ipa		1.78							1.39
59	Apelin Cardiomyocyte Signaling Pathway		ipa	rna	ipa		4		2.63			1.61		5.25		2.66
60	Apelin Endothelial Signaling Pathway		ipa	prot	ipa				1.31
60	Apelin Endothelial Signaling Pathway		ipa	rna	ipa		3.85		2.34					5.32		2.95
61	Apelin Liver Signaling Pathway		ipa	prot	ipa		4.31		4.1
61	Apelin Liver Signaling Pathway		ipa	rna	ipa		3.41							2.92
62	Apelin Pancreas Signaling Pathway		ipa	rna	ipa									2.15
63	Apelin signaling pathway	path:hsa04371	KEGG	metab	TOPO			4.37882		2.70774
64	Apoptosis	path:hsa04210	KEGG	metab	TOPO	2.49214		5.31605		2.6073
65	Apoptosis - multiple species	path:hsa04215	KEGG	metab	TOPO			5.31605		4.78781
66	Apoptosis Signaling		ipa	rna	ipa											1.52
67	April Mediated Signaling		ipa	rna	ipa									2.23		3.06
68	Arachidonic acid metabolism	R-HSA-2142753	Reactome	lipid	ORA	1.93181		1.77989		1.59517
69	Arachidonic Acid Metabolism	SMP0000075	SMPDB	lipid	ORA	2.05159		1.89963		1.7122
69	Arachidonic Acid Metabolism	SMP0000075	SMPDB	metab	MSEA	4.12668		3.27165
70	Arachidonic acid metabolism	WP2650	Wikipathway	lipid	ORA	1.93181		1.77989		1.59517
71	Arginine and Proline Metabolism	SMP0000020	SMPDB	metab	MSEA	2.12321		5.31605
72	Arginine Degradation VI (Arginase 2 Pathway)		ipa	prot	ipa			2.8
73	Aryl Hydrocarbon Receptor Signaling		ipa	rna	ipa							1.7		1.42	1.39	1.94	1.67
74	Ascorbate Recycling (Cytosolic)		ipa	rna	ipa										2.24		2.39
75	Asparagine Degradation I		ipa	prot	ipa	1.87		1.68
76	Aspartate Degradation II		ipa	rna	ipa										1.42		1.55
77	Aspartate Metabolism	SMP0000067	SMPDB	metab	MSEA			3.08249
78	Assembly of RNA Polymerase I Complex		ipa	rna	ipa							1.49
79	Assembly of RNA Polymerase II Complex		ipa	rna	ipa								1.44		1.59		1.52
80	Asthma	path:hsa05310	KEGG	metab	TOPO	1.66959		1.4389
81	Atherosclerosis Signaling		ipa	rna	ipa	1.33	8.49	2.52	2.25	2.04
81	Atherosclerosis Signaling		ipa	prot	ipa		13.9		20.7
82	ATM Signaling		ipa	rna	ipa							4.46		3.9		3.5
83	Autoimmune Thyroid Disease Signaling		ipa	prot	ipa				1.88
83	Autoimmune Thyroid Disease Signaling		ipa	rna	ipa		11		3.75
84	Autophagy - animal	path:hsa04140	KEGG	metab	TOPO			3.27165		1.4023
85	Autophagy - other	path:hsa04136	KEGG	metab	TOPO			5.31605
86	Axon guidance	path:hsa04360	KEGG	metab	TOPO			5.27737		5.31605
87	Axonal Guidance Signaling		ipa	rna	ipa	1.99	17	3.3	8.38	3.59		2.03		9.49		6.5
87	Axonal Guidance Signaling		ipa	prot	ipa				3.57
88	B Cell Activating Factor Signaling		ipa	rna	ipa		1.92		1.54					2.53		3.42
89	B Cell Development		ipa	rna	ipa		12.5		5.23				2.45
90	B Cell Receptor Signaling		ipa	rna	ipa		7.72		4.39			1.85		6.87		4.42
91	B cell receptor signaling pathway	path:hsa04662	KEGG	metab	TOPO			5.31605		5.31605
92	Bacterial invasion of epithelial cells	path:hsa05100	KEGG	metab	TOPO			5.31605		5.31605
93	Basal cell carcinoma	path:hsa05217	KEGG	metab	TOPO			1.76955
94	Basal Cell Carcinoma Signaling		ipa	rna	ipa	1.6	2.2	1.64	1.42	1.61		2.39		3.25		2.32
95	BER pathway		ipa	rna	ipa									1.57
96	beta-Alanine Metabolism	SMP0000007	SMPDB	metab	MSEA	2.34486		5.98297
97	Betaine Metabolism	SMP0000123	SMPDB	metab	MSEA	2.12321
98	BEX2 Signaling Pathway		ipa	rna	ipa		3.06		2.3					1.93		2.07
99	Bile Acid Biosynthesis	SMP0000035	SMPDB	metab	MSEA	2.87943		3.08355
100	Bile secretion	path:hsa04976	KEGG	metab	TOPO	3.81248		1.77469
101	Biosynthesis of unsaturated fatty acids	path:hsa01040	KEGG	lipid	ORA					1.89963
101	Biosynthesis of unsaturated fatty acids	path:hsa01040	KEGG	metab	TOPO	5.31605
102	Biotin-carboxyl Carrier Protein Assembly		ipa	rna	ipa							2.37		2.01		2.11
103	Bladder cancer	path:hsa05219	KEGG	metab	TOPO			3.55909		1.73518
104	Bladder Cancer Signaling		ipa	rna	ipa			3.2
105	Branched-chain α-keto acid Dehydrogenase Complex		ipa	rna	ipa											1.58
106	Breast Cancer Regulation by Stathmin1		ipa	rna	ipa		13.4		5.02	3.79				4.95
107	Bromfenac Action Pathway	SMP00102	SMPDB	lipid	ORA	2.05159		1.89963		1.7122
108	Bupropion Degradation		ipa	rna	ipa	2.19		2.22			1.48
109	C-type lectin receptor signaling pathway	path:hsa04625	KEGG	metab	TOPO					1.4698
110	Ca-dependent events	R-HSA-111996	Reactome	lipid	ORA	3.38934		3.22475		3.03105
111	Caffeine Metabolism	SMP0000028	SMPDB	metab	MSEA			2.95078
112	Calcium Signaling		ipa	prot	ipa				1.43
112	Calcium Signaling		ipa	rna	ipa		1.54		3.22					1.88		2.85
113	Calcium Transport I		ipa	rna	ipa									1.37
114	Calcium-induced T Lymphocyte Apoptosis		ipa	rna	ipa		7.18		3.03
115	cAMP signaling pathway	path:hsa04024	KEGG	metab	TOPO			5.31605
116	cAMP-mediated signaling		ipa	rna	ipa		8.43		8.41					1.32
117	Cardiac Hypertrophy Signaling		ipa	rna	ipa		3.32		4.07					2.96		2.63
118	Cardiac Hypertrophy Signaling (Enhanced)		ipa	rna	ipa		9.49	2.85	8.27	2.18		3.36		12.2		10.3
118	Cardiac Hypertrophy Signaling (Enhanced)		ipa	prot	ipa				2.55
119	Cardiac β-adrenergic Signaling		ipa	prot	ipa				3.06
119	Cardiac β-adrenergic Signaling		ipa	rna	ipa		4.76		6.35					1.47		1.38
120	Carnitine Synthesis	SMP0000465	SMPDB	metab	MSEA	2.12321
121	Carprofen Action Pathway	SMP00694	SMPDB	lipid	ORA	2.05159		1.89963		1.7122
122	Catecholamine Biosynthesis	SMP0000012	SMPDB	metab	MSEA	3.58336
123	Caveolar-mediated Endocytosis Signaling		ipa	prot	ipa		2.21		5.95
123	Caveolar-mediated Endocytosis Signaling		ipa	rna	ipa		3.48		3.1			1.98	1.68	3.53		1.38
124	CCR3 Signaling in Eosinophils		ipa	prot	ipa				3.02
124	CCR3 Signaling in Eosinophils		ipa	rna	ipa		1.95							2.49		1.4
125	CCR5 Signaling in Macrophages		ipa	prot	ipa				1.72
125	CCR5 Signaling in Macrophages		ipa	rna	ipa		7.73		5.42					2.5		1.88
126	CD27 Signaling in Lymphocytes		ipa	rna	ipa							1.41		1.62		1.96
127	CD28 Signaling in T Helper Cells		ipa	rna	ipa		13.1		5.66					4.28		1.76
128	CD40 Signaling		ipa	rna	ipa		1.42							3.7		3
129	Cdc42 Signaling		ipa	prot	ipa				2.28
129	Cdc42 Signaling		ipa	rna	ipa		5.24		3.27
130	CDK5 Signaling		ipa	prot	ipa		1.53		1.43
130	CDK5 Signaling		ipa	rna	ipa				1.89
131	CDP-diacylglycerol Biosynthesis I		ipa	rna	ipa								2.87		1.45		1.67
132	Celecoxib Action Pathway	SMP00096	SMPDB	lipid	ORA	2.02091		1.86646		1.67985
133	Cell adhesion molecules	path:hsa04514	KEGG	metab	TOPO			1.88606		3.61083
134	Cell cycle	path:hsa04110	KEGG	metab	TOPO			1.73518		1.82974
135	Cell Cycle Control of Chromosomal Replication		ipa	prot	ipa	2.2		1.68
135	Cell Cycle Control of Chromosomal Replication		ipa	rna	ipa							2.63		1.68		1.71
136	Cell Cycle: G1/S Checkpoint Regulation		ipa	rna	ipa							4.13		4.32		2.79
137	Cell Cycle: G2/M DNA Damage Checkpoint Regulation		ipa	prot	ipa	2.36		1.84
137	Cell Cycle: G2/M DNA Damage Checkpoint Regulation		ipa	rna	ipa							3.91		2.78		1.32
138	Cellular Effects of Sildenafil (Viagra)		ipa	prot	ipa				3.37
138	Cellular Effects of Sildenafil (Viagra)		ipa	rna	ipa		6.49		7.72					4		3.53
139	Cellular senescence	path:hsa04218	KEGG	metab	TOPO					1.70553
140	Ceramide biosynthesis	mod:hsa_M00094	KEGG	metab	TOPO	1.9914				2.14206
141	Ceramide signalling	R-HSA-193681	Reactome	lipid	ORA	4.05552		3.88941		3.68613
141	ceramide signaling pathway	ceramidepathway	BioCarta	lipid	ORA	4.92082		4.76447		4.55129
142	cGMP-PKG signaling pathway	path:hsa04022	KEGG	metab	TOPO			2.52288		5.31605
143	Chagas disease	path:hsa05142	KEGG	metab	TOPO			5.31605		5.28316
144	Chemokine Signaling		ipa	rna	ipa		1.47			1.52
145	Chemokine signaling pathway	path:hsa04062	KEGG	metab	TOPO			2.64782		3.34294
146	Choline metabolism in cancer	path:hsa05231	KEGG	metab	TOPO	3.14327		5.31605		3.14327
146	Choline metabolism in cancer	path:hsa05231	KEGG	lipid	ORA	3.44733		5.21467		4.87943
147	Cholinergic synapse	path:hsa04725	KEGG	metab	TOPO			5.31605		5.31605
148	Chondroitin and Dermatan Biosynthesis		ipa	rna	ipa									1.66
149	Chondroitin Sulfate Biosynthesis		ipa	rna	ipa		1.47	2.83	2.14
150	Chondroitin Sulfate Biosynthesis (Late Stages)		ipa	rna	ipa	1.42	1.92	3.14	2.64
151	Chondroitin sulfate degradation	mod:hsa_M00077	KEGG	metab	TOPO	5.31605		5.31605
152	Chronic myeloid leukemia	path:hsa05220	KEGG	metab	TOPO			3.83565		2.6216
153	Chronic Myeloid Leukemia Signaling		ipa	rna	ipa							3.52		5.16		2.97
154	Chylomicron remodeling	R-HSA-8963901	Reactome	lipid	ORA			3.73518		3.5391
155	Circadian entrainment	path:hsa04713	KEGG	metab	TOPO					1.4318
156	Circadian rhythm	path:hsa04710	KEGG	metab	TOPO			5.31605
157	Circadian Rhythm Signaling		ipa	rna	ipa				1.5					1.45		1.7
158	Class A/1 (Rhodopsin-like receptors)	R-HSA-373076	Reactome	lipid	ORA					1.69037
159	Clathrin-mediated Endocytosis Signaling		ipa	prot	ipa		4.85		9.41
159	Clathrin-mediated Endocytosis Signaling		ipa	rna	ipa							1.42	1.64
160	Cleavage and Polyadenylation of Pre-mRNA		ipa	rna	ipa							1.49
161	CNTF Signaling		ipa	rna	ipa							2.14		2.63		1.63
162	Coagulation System		ipa	prot	ipa		9.93		23.3
162	Coagulation System		ipa	rna	ipa		2.98
163	Coenzyme A Biosynthesis		ipa	rna	ipa								1.5		1.43
164	Coenzyme A biosynthesis, pantothenate => CoA	mod:hsa_M00120	KEGG	metab	TOPO					2.62525
165	Colorectal cancer	path:hsa05210	KEGG	metab	TOPO			3.31876		3.38828
166	Colorectal Cancer Metastasis Signaling		ipa	rna	ipa		5.77		2.7	3.67		2.1		5.34		3.72
167	Communication between Innate and Adaptive Immune Cells		ipa	rna	ipa		13.9		5.27	1.38			1.33
167	Communication between Innate and Adaptive Immune Cells		ipa	prot	ipa				2.18
168	Complement System		ipa	prot	ipa		14.1		29.6
168	Complement System		ipa	rna	ipa		9.06		5.09					2.63
169	Conjugated bile acid biosynthesis, cholate => taurocholate/glycocholate	mod:hsa_M00106	KEGG	metab	TOPO	1.46344
170	COPI-independent Golgi-to-ER retrograde traffic	R-HSA-6811436	Reactome	lipid	ORA	3.68613		3.51999		3.33348
171	Coronavirus disease - COVID-19	path:hsa05171	KEGG	metab	TOPO			1.34775		1.32883
172	Coronavirus Pathogenesis Pathway		ipa	rna	ipa								4.79		6.07		6.41
173	Coronavirus Replication Pathway		ipa	prot	ipa				2.03
174	Corticotropin Releasing Hormone Signaling		ipa	rna	ipa		5.01		4.69					5.38		5.72
175	Creatine pathway	mod:hsa_M00047	KEGG	metab	TOPO	5.31605		5.31605
176	CREB Signaling in Neurons		ipa	rna	ipa		19.7		9.89	5.31				11.3		3.78
177	Crosstalk between Dendritic Cells and Natural Killer Cells		ipa	rna	ipa		7.04		3.13
178	CTLA4 Signaling in Cytotoxic T Lymphocytes		ipa	rna	ipa		5.29		4.67					1.51
179	CXCR4 Signaling		ipa	prot	ipa				2.03
179	CXCR4 Signaling		ipa	rna	ipa		4.54		2.56					2.44
180	Cyclins and Cell Cycle Regulation		ipa	rna	ipa							2.08		1.78		1.4
181	Cysteine Metabolism	SMP0000013	SMPDB	metab	MSEA			3.06098
182	Cytokine-cytokine receptor interaction	path:hsa04060	KEGG	metab	TOPO			3.47237		3.74958
183	Cytotoxic T Lymphocyte-mediated Apoptosis of Target Cells		ipa	rna	ipa		1.45
184	D-glucuronate Degradation I		ipa	rna	ipa								2.92		2.81		2.95
185	D-Glutamine and D-glutamate metabolism	path:hsa00471	KEGG	metab	TOPO	3.31695
186	D-myo-inositol (1,3,4)-trisphosphate Biosynthesis		ipa	rna	ipa									2.16
187	D-myo-inositol (1,4,5,6)-Tetrakisphosphate Biosynthesis		ipa	rna	ipa							1.33		2.31
188	D-myo-inositol (1,4,5)-Trisphosphate Biosynthesis		ipa	rna	ipa								1.36	3.13		1.79
189	D-myo-inositol (3,4,5,6)-tetrakisphosphate Biosynthesis		ipa	rna	ipa							1.33		2.31
190	D-myo-inositol-5-phosphate Metabolism		ipa	rna	ipa							1.56		3.64		1.68
191	Death Receptor Signaling		ipa	rna	ipa							2.29		2.36		2.92
192	Death Receptor Signalling	R-HSA-73887	Reactome	lipid	ORA	3.44733		3.29158		3.09259
193	Dendritic Cell Maturation		ipa	prot	ipa		1.55		3.02
193	Dendritic Cell Maturation		ipa	rna	ipa		10.5		3.69					2.59		1.65
194	Dermatan Sulfate Biosynthesis		ipa	rna	ipa		2.11	2.73	2.45
195	Dermatan Sulfate Biosynthesis (Late Stages)		ipa	rna	ipa	1.47	2.54	3.22	3.39
196	Developmental Biology	R-HSA-1266738	Reactome	lipid	ORA			2.73049		2.52143
197	Diclofenac Action Pathway	SMP00093	SMPDB	lipid	ORA	2.05159		1.89963		1.7122
198	Differential Regulation of Cytokine Production in Intestinal Epithelial Cells by IL-17A and IL-17F		ipa	rna	ipa	2.29		2.33
199	Differential Regulation of Cytokine Production in Macrophages and T Helper Cells by IL-17A and IL-17F		ipa	rna	ipa		1.66
200	Diflunisal Action Pathway	SMP00289	SMPDB	lipid	ORA	2.05159		1.89963		1.7122
201	Digestion	R-HSA-8935690	Reactome	lipid	ORA			2.25571		2.05159
202	Digestion	WP4104	Wikipathway	lipid	ORA			2.31426		2.10347
203	Digestion and absorption	R-HSA-8963743	Reactome	lipid	ORA			2.21824		2.04144
204	Digestion of dietary lipid	R-HSA-192456	Reactome	lipid	ORA			2.96257		2.75449
205	Dilated cardiomyopathy	path:hsa05414	KEGG	metab	TOPO			2.02319
206	DNA Double-Strand Break Repair by Homologous Recombination		ipa	rna	ipa							5.19		5.09		4.38
207	DNA Double-Strand Break Repair by Non-Homologous End Joining		ipa	rna	ipa							5.19		5.09		4.38
208	DNA Methylation and Transcriptional Repression Signaling		ipa	rna	ipa							5.08		4.68		3.91
209	Docosahexaenoic Acid (DHA) Signaling		ipa	rna	ipa		1.65							2.49		1.58
210	Dopamine Degradation		ipa	prot	ipa			1.41
210	Dopamine Degradation		ipa	rna	ipa										1.74
211	Dopamine-DARPP32 Feedback in cAMP Signaling		ipa	rna	ipa		2.02		3.41					2.69		2.46
212	Dopaminergic synapse	path:hsa04728	KEGG	metab	TOPO					1.44249
213	dTMP De Novo Biosynthesis		ipa	rna	ipa										1.89		2.03
214	EGF Signaling		ipa	rna	ipa							5.86		4.23		3.82
215	EGFR tyrosine kinase inhibitor resistance	path:hsa01521	KEGG	metab	TOPO			5.31605		5.31605
216	Eicosanoid Signaling		ipa	rna	ipa		2.56		1.65	1.68
217	EIF2 Signaling		ipa	rna	ipa								24.9		29.6		26.6
218	Endocannabinoid Cancer Inhibition Pathway		ipa	rna	ipa		2.45		2.04			1.49		3.01		2.41
219	Endocannabinoid Developing Neuron Pathway		ipa	rna	ipa		2.31		1.98
220	Endocannabinoid Neuronal Synapse Pathway		ipa	prot	ipa				1.49
220	Endocannabinoid Neuronal Synapse Pathway		ipa	rna	ipa	1.31	3.13		5.71					1.99		3.78
221	Endocrine and other factor-regulated calcium reabsorption	path:hsa04961	KEGG	metab	TOPO			2.35952
222	Endometrial cancer	path:hsa05213	KEGG	metab	TOPO			2.59517		3.36051
223	Endometrial Cancer Signaling		ipa	rna	ipa							1.91		2.31		2.02
224	Endothelin-1 Signaling		ipa	rna	ipa		2.87		2.52					3.82		4.27
225	eNOS Signaling		ipa	rna	ipa		4.19		4.41	1.78				4.07		2.69
225	eNOS Signaling		ipa	prot	ipa				1.38
226	Ephrin A Signaling		ipa	prot	ipa		1.41
226	Ephrin A Signaling		ipa	rna	ipa		1.55					1.49		2.61
227	Ephrin B Signaling		ipa	prot	ipa		1.56		2.33
227	Ephrin B Signaling		ipa	rna	ipa		2.62		2.21				1.4
228	Ephrin Receptor Signaling		ipa	prot	ipa				2.46
228	Ephrin Receptor Signaling		ipa	rna	ipa	1.56	3.81	2.11	2.81				1.54	1.74
229	Epithelial Adherens Junction Signaling		ipa	prot	ipa		1.95		3.32
229	Epithelial Adherens Junction Signaling		ipa	rna	ipa		2.41					1.55		4.36		2.87
230	Epstein-Barr virus infection	path:hsa05169	KEGG	metab	TOPO			3.29243		3.03574
231	ErbB Signaling		ipa	rna	ipa							1.36		3.85		2.75
232	ErbB signaling pathway	path:hsa04012	KEGG	metab	TOPO			5.31605		5.31605
233	ErbB2-ErbB3 Signaling		ipa	rna	ipa									2.17
234	ErbB4 Signaling		ipa	rna	ipa									3.04
235	ERK/MAPK Signaling		ipa	rna	ipa		1.64							1.38
236	ERK5 Signaling		ipa	rna	ipa							1.74		1.61		1.44
237	Erythropoietin Signaling Pathway		ipa	rna	ipa							2.67		3.28		2.15
238	Estrogen Biosynthesis		ipa	rna	ipa	1.57		1.61
239	Estrogen Receptor Signaling		ipa	rna	ipa		2.22		1.55			4.36		6.66		5.64
240	Estrogen signaling pathway	path:hsa04915	KEGG	metab	TOPO			5.31605		5.31605
241	Estrogen-mediated S-phase Entry		ipa	prot	ipa	1.88		1.52
242	Estrone Metabolism	SMP0030880	SMPDB	metab	MSEA	2.12321
243	Ethanol Degradation II		ipa	prot	ipa			1.36
243	Ethanol Degradation II		ipa	rna	ipa			1.92					2.88		3.85		1.85
244	Etodolac Action Pathway	SMP00084	SMPDB	lipid	ORA	2.05159		1.89963		1.7122
245	Etoricoxib Action Pathway	SMP00695	SMPDB	lipid	ORA	2.05159		1.89963		1.7122
246	Extrinsic Prothrombin Activation Pathway		ipa	prot	ipa		2.72		9.9
247	Fabry disease	SMP00525	SMPDB	lipid	ORA	5.31605		5.31426		4.86328
248	Factors Promoting Cardiogenesis in Vertebrates		ipa	rna	ipa	1.54		2.13				5.15		6.73		5.58
249	FAK Signaling		ipa	rna	ipa		3.67		2.03	1.32		2.44		4.64		2.58
249	FAK Signaling		ipa	prot	ipa				1.51
250	Fat digestion and absorption	path:hsa04975	KEGG	lipid	ORA			3.16494		2.96257
251	FAT10 Cancer Signaling Pathway		ipa	rna	ipa							2.34		4.2		3.17
252	fatty acid &beta;-oxidation	FAO-PWY	HUMCYC	lipid	ORA					1.82974
253	fatty acid &beta;-oxidation (peroxisome)	PWY66-391	HUMCYC	lipid	ORA					1.81816
254	fatty acid activation	PWY-5143	HUMCYC	lipid	ORA					2.55596
255	Fatty Acid Biosynthesis	SMP0000456	SMPDB	metab	MSEA	3.76955		3.91364
256	Fatty acid elongation	path:hsa00062	KEGG	metab	TOPO	1.43063
257	Fatty acid metabolism	R-HSA-8978868	Reactome	lipid	ORA	1.32514
258	Fatty Acid β-oxidation I		ipa	rna	ipa										1.97
259	Fc Epsilon RI Signaling		ipa	rna	ipa		3.32		1.31					3.32		1.75
260	Fc epsilon RI signaling pathway	path:hsa04664	KEGG	metab	TOPO	2.4698		4.28316
261	Fc gamma R-mediated phagocytosis	path:hsa04666	KEGG	metab	TOPO	2.52143		5.31605		5.31605
262	Fcgamma receptor (FCGR) dependent phagocytosis	R-HSA-2029480	Reactome	lipid	ORA			2.84164		2.62893
263	Fcgamma receptor (FCGR) dependent phagocytosis	WP2719	Wikipathway	lipid	ORA	3.09259		4.61439		4.28735
264	Fcγ Receptor-mediated Phagocytosis in Macrophages and Monocytes		ipa	rna	ipa		4.36						1.69	2.81
265	FcγRIIB Signaling in B Lymphocytes		ipa	rna	ipa		2.87		2.97					2.92		2.74
266	Fenoprofen Action Pathway	SMP00696	SMPDB	lipid	ORA	2.05159		1.89963		1.7122
267	Ferroptosis	path:hsa04216	KEGG	metab	TOPO	5.31605
268	Ferroptosis Signaling Pathway		ipa	prot	ipa			1.36
268	Ferroptosis Signaling Pathway		ipa	rna	ipa								1.34		2.01		1.72
269	FGF Signaling		ipa	rna	ipa							2.88		4.23		4.11
270	FLT3 Signaling in Hematopoietic Progenitor Cells		ipa	rna	ipa							2.15		3.13		1.72
271	Flurbiprofen Action Pathway	SMP00697	SMPDB	lipid	ORA	2.05159		1.89963		1.7122
272	fMLP Signaling in Neutrophils		ipa	rna	ipa		3.38		1.33	3.19				3.1
272	fMLP Signaling in Neutrophils		ipa	prot	ipa				1.71
273	Focal adhesion	path:hsa04510	KEGG	metab	TOPO			4.82391		4.86328
274	Folate Polyglutamylation		ipa	prot	ipa	1.48
275	Folate Transformations I		ipa	prot	ipa			2.43
276	Formation of the cornified envelope	R-HSA-6809371	Reactome	lipid	ORA			3.51999		3.33348
277	Free fatty acid receptors	R-HSA-444209	Reactome	lipid	ORA					2.55596
278	FXR/RXR Activation		ipa	prot	ipa		21		26.4
278	FXR/RXR Activation		ipa	rna	ipa	2.46	1.88	3.2
279	G alpha (i) signalling events	R-HSA-418594	Reactome	lipid	ORA	2.71897		4.81248		5.31605
280	G alpha (q) signalling events	R-HSA-416476	Reactome	lipid	ORA					1.85699
281	G Beta Gamma Signaling		ipa	prot	ipa				2.54
281	G Beta Gamma Signaling		ipa	rna	ipa		3.06		3.65					1.66		1.94
282	G Protein Signaling Mediated by Tubby		ipa	prot	ipa				1.93
282	G Protein Signaling Mediated by Tubby		ipa	rna	ipa		2.79		2.83					2.58
283	G-Protein Coupled Receptor Signaling		ipa	rna	ipa		10.9		10.1					3.25		1.62
284	G-protein mediated events	R-HSA-112040	Reactome	lipid	ORA	3.05651		4.55284		4.22695
285	GABA Receptor Signaling		ipa	rna	ipa									2.42		4.08
286	Galactose Metabolism	SMP0000043	SMPDB	metab	MSEA	1.90658		3.9431
287	Gap junction	path:hsa04540	KEGG	metab	TOPO					1.59688
288	Gap Junction Signaling		ipa	prot	ipa				2.29
288	Gap Junction Signaling		ipa	rna	ipa		3.42		3.16			2.67		6.7		3.84
289	Gastric acid secretion	path:hsa04971	KEGG	metab	TOPO	5.31605		5.31605		1.32239
290	Gastric cancer	path:hsa05226	KEGG	metab	TOPO					5.31605
291	Gaucher Disease	SMP00349	SMPDB	lipid	ORA	5.31605		5.31426		4.86328
292	GDNF Family Ligand-Receptor Interactions		ipa	rna	ipa		2.38		2.02					3.57		2.65
293	GDP-L-fucose Biosynthesis I (from GDP-D-mannose)		ipa	prot	ipa	1.87		1.68
294	Germ Cell-Sertoli Cell Junction Signaling		ipa	prot	ipa				1.95
294	Germ Cell-Sertoli Cell Junction Signaling		ipa	rna	ipa		1.31							2.67
295	Glioblastoma Multiforme Signaling		ipa	rna	ipa		1.96			1.74		5.74		5.13		4.55
296	Glioma	path:hsa05214	KEGG	metab	TOPO			5.31605		5.31605
297	Glioma Invasiveness Signaling		ipa	rna	ipa		3			1.6
297	Glioma Invasiveness Signaling		ipa	prot	ipa				2.29
298	Glioma Signaling		ipa	rna	ipa							3.68		3.98		3.03
299	Globoid Cell Leukodystrophy	SMP00348	SMPDB	lipid	ORA	5.31605		5.31426		4.86328
300	Glucocorticoid Receptor Signaling		ipa	rna	ipa		3.01	2.37				2.6		3.13		1.99
301	Gluconeogenesis	SMP0000128	SMPDB	metab	MSEA	1.90658		3.9431
302	Gluconeogenesis I		ipa	rna	ipa										1.6		1.34
303	Glucose-Alanine Cycle	SMP0000127	SMPDB	metab	MSEA	1.90658		3.9431
304	Glutamate Receptor Signaling		ipa	prot	ipa				1.62
304	Glutamate Receptor Signaling		ipa	rna	ipa		2.71		2.57					2.26		2.3
305	Glutamate Removal from Folates		ipa	prot	ipa	2.17		1.98
305	Glutamate Removal from Folates		ipa	rna	ipa	1.81		1.83
306	Glutamatergic synapse	path:hsa04724	KEGG	metab	TOPO	2.37572		5.31605		5.31605
307	Glutamine Degradation I		ipa	rna	ipa			1.53
308	Glutaryl-CoA Degradation		ipa	rna	ipa										1.51
309	Glutathione Redox Reactions I		ipa	prot	ipa	1.95	3.28		1.51
309	Glutathione Redox Reactions I		ipa	rna	ipa								1.98		2.37		2.68
310	Glutathione-mediated Detoxification		ipa	prot	ipa	1.71
310	Glutathione-mediated Detoxification		ipa	rna	ipa								2.29		2.06		2.39
311	Glycerolipid Metabolism	SMP0000039	SMPDB	metab	MSEA			4.58336
312	Glycerophospholipid biosynthesis	R-HSA-1483206	Reactome	lipid	ORA	2.05159		4.37366		3.92445
313	Glycerophospholipid biosynthesis	WP2740	Wikipathway	lipid	ORA	2.05159		3.09854		2.79317
314	Glycerophospholipid metabolism	Glycerophospholipid metabolism	EHMN	lipid	ORA	3.03245		5.31605		4.74473
315	Glycerophospholipid metabolism	path:hsa00564	KEGG	lipid	ORA	2.27165		3.4168		3.11691
316	Glycine and Serine Metabolism	SMP0000004	SMPDB	metab	MSEA			3.82974
317	Glycine Biosynthesis I		ipa	rna	ipa										1.87		1.97
318	Glycogen Degradation II		ipa	prot	ipa				1.34
319	Glycolysis	SMP0000040	SMPDB	metab	MSEA	1.90658		3.9431
320	Glycosaminoglycan degradation	path:hsa00531	KEGG	metab	TOPO	4.34104		5.31605
321	Glycosphingolipid biosynthesis - ganglio series	path:hsa00604	KEGG	metab	TOPO	4.0511		1.4908		4.72125
322	Glycosphingolipid biosynthesis - globo and isoglobo series	path:hsa00603	KEGG	metab	TOPO					2.39577
323	Glycosphingolipid biosynthesis - lacto and neolacto series	path:hsa00601	KEGG	metab	TOPO					2.11126
324	Glycosphingolipid metabolism	Glycosphingolipid metabolism	EHMN	lipid	ORA	3.61083		3.36051		3.05899
325	Glycosphingolipid metabolism	R-HSA-1660662	Reactome	lipid	ORA	4.01592		3.74232		3.44612
326	Glycosylphosphatidylinositol (GPI)-anchor biosynthesis	path:hsa00563	KEGG	metab	TOPO			3.77469
327	Glycosylphosphatidylinositol(GPI)-anchor biosynthesis	Glycosylphosphatidylinositol(GPI)-anchor biosynthesis	EHMN	lipid	ORA			3.05899		2.85699
328	GM-CSF Signaling		ipa	rna	ipa		1.55							1.75
329	GnRH secretion	path:hsa04929	KEGG	metab	TOPO			1.89963		2.14874
330	GNRH Signaling		ipa	prot	ipa				1.54
330	GNRH Signaling		ipa	rna	ipa		1.48							3.03		4.84
331	GnRH signaling pathway	path:hsa04912	KEGG	metab	TOPO	3.32698		5.31605		5.31605
332	Golgi-to-ER retrograde transport	R-HSA-8856688	Reactome	lipid	ORA	3.51999		3.36051		3.16494
333	GP6 Signaling Pathway		ipa	rna	ipa		16.2		3.5	8		6.32		18.6		9.72
333	GP6 Signaling Pathway		ipa	prot	ipa		14		15.7
334	GPCR downstream signalling	R-HSA-388396	Reactome	lipid	ORA	2.36754		4.22695		5.31605
335	GPCR ligand binding	R-HSA-500792	Reactome	lipid	ORA					1.32239
336	GPCR-Mediated Integration of Enteroendocrine Signaling Exemplified by an L Cell		ipa	prot	ipa		1.54		2.29
336	GPCR-Mediated Integration of Enteroendocrine Signaling Exemplified by an L Cell		ipa	rna	ipa		2.56		4.76					1.81		2.24
337	GPCR-Mediated Nutrient Sensing in Enteroendocrine Cells		ipa	prot	ipa				2.28
337	GPCR-Mediated Nutrient Sensing in Enteroendocrine Cells		ipa	rna	ipa		3.2		4.2					3.79		3.86
338	Graft-versus-Host Disease Signaling		ipa	rna	ipa		4.71
339	Granulocyte Adhesion and Diapedesis		ipa	rna	ipa	6.28	10.9	8.1	5.01	3.52
339	Granulocyte Adhesion and Diapedesis		ipa	prot	ipa		1.68		3.8
340	Growth Hormone Signaling		ipa	rna	ipa		1.86					2.85		6.73		2.08
341	Growth hormone synthesis, secretion and action	path:hsa04935	KEGG	metab	TOPO			5.31605		5.31605
342	Gustation Pathway		ipa	prot	ipa				2.26
342	Gustation Pathway		ipa	rna	ipa		5.69		7.59					2.71		3.5
343	Gα12/13 Signaling		ipa	rna	ipa		3.35		2.11					2.04		1.69
344	Gαi Signaling		ipa	prot	ipa				1.54
344	Gαi Signaling		ipa	rna	ipa		7.54		5.39					1.93
345	Gαq Signaling		ipa	prot	ipa				1.41
345	Gαq Signaling		ipa	rna	ipa		5.56		4.51					2.83		1.68
346	Gαs Signaling		ipa	rna	ipa		3.07		4.5
347	HDL remodeling	R-HSA-8964058	Reactome	lipid	ORA	4.95861		5.74715		5.37469
348	Hedgehog signaling pathway	path:hsa04340	KEGG	metab	TOPO			5.31605
349	Hematopoiesis from Pluripotent Stem Cells		ipa	prot	ipa				1.88
349	Hematopoiesis from Pluripotent Stem Cells		ipa	rna	ipa		6.72		3.14
350	Heme biosynthesis, bacteria, glutamyl-tRNA => coproporphyrin III => heme	mod:hsa_M00926	KEGG	metab	TOPO					1.59688
351	Heme Degradation		ipa	rna	ipa										2.24		2.39
352	Heparan Sulfate Biosynthesis		ipa	rna	ipa	1.47		2.92	1.52
353	Heparan Sulfate Biosynthesis (Late Stages)		ipa	prot	ipa			1.4
353	Heparan Sulfate Biosynthesis (Late Stages)		ipa	rna	ipa	1.6		3.14	1.8
354	Hepatic Cholestasis		ipa	rna	ipa	2.07	2.09	2.15				1.47		3.43		2.14
355	Hepatic Fibrosis / Hepatic Stellate Cell Activation		ipa	rna	ipa		25.7	1.66	6.13	7.88		3.29		12		7.14
355	Hepatic Fibrosis / Hepatic Stellate Cell Activation		ipa	prot	ipa		13.5		16.3
356	Hepatic Fibrosis Signaling Pathway		ipa	rna	ipa		12	2.32	3.24	3.54		5.33		12.4		7.41
356	Hepatic Fibrosis Signaling Pathway		ipa	prot	ipa		1.73		3.93
357	Hepatitis B	path:hsa05161	KEGG	metab	TOPO			4.77989		4.1549
358	Hepatitis C	path:hsa05160	KEGG	metab	TOPO			5.31605		5.31605
359	HER-2 Signaling in Breast Cancer		ipa	rna	ipa		1.4					2.62		3.66	1.59	2.17	1.79
360	Hereditary Breast Cancer Signaling		ipa	rna	ipa							6.92		5.94		4.75
361	Herpes simplex virus 1 infection	path:hsa05168	KEGG	metab	TOPO			3.72125		4.97469
362	HGF Signaling		ipa	rna	ipa		2.43					4.33		8.19		4.53
363	HIF1α Signaling		ipa	rna	ipa		4.12	1.46		3.19				2.51		1.36
364	HIPPO signaling		ipa	rna	ipa							3.17		2.65		1.66
365	Hippo signaling pathway	path:hsa04390	KEGG	metab	TOPO			5.31605		5.20412
366	Hippo signaling pathway - multiple species	path:hsa04392	KEGG	metab	TOPO			5.31605		5.31605
367	Histamine Degradation		ipa	rna	ipa										1.41
368	Histidine Metabolism	SMP0000044	SMPDB	metab	MSEA	3.6216		6.44491
369	HMGB1 Signaling		ipa	rna	ipa		2.53
370	Homocysteine Degradation	SMP0000455	SMPDB	metab	MSEA			2.92812
371	HOTAIR Regulatory Pathway		ipa	rna	ipa		2.72	1.98	1.84	2.67		7.88		8.82		7.65
372	Human cytomegalovirus infection	path:hsa05163	KEGG	metab	TOPO			5.24642		5.31605
373	Human Embryonic Stem Cell Pluripotency		ipa	rna	ipa		3.92		3.04	2.94		3.51		4.98		3.52
374	Human immunodeficiency virus 1 infection	path:hsa05170	KEGG	metab	TOPO			5.31605		5.31605
375	Human papillomavirus infection	path:hsa05165	KEGG	metab	TOPO			5.31605
376	Huntington's Disease Signaling		ipa	rna	ipa							3.35	3.09	5.28	2.89	3.34	3.65
377	Hypertrophic cardiomyopathy	path:hsa05410	KEGG	metab	TOPO			1.54975
378	Hypoxia Signaling in the Cardiovascular System		ipa	rna	ipa								1.63		5.21		2.49
379	Hypusine Biosynthesis		ipa	rna	ipa								1.5		1.43		1.52
380	Ibuprofen Action Pathway	SMP00086	SMPDB	lipid	ORA	2		1.84771		1.66154
381	iCOS-iCOSL Signaling in T Helper Cells		ipa	rna	ipa		14.5		6.99					4.61		2.1
382	IGF-1 Signaling		ipa	rna	ipa		1.79					2.14		3.2		1.77
383	IL-1 Signaling		ipa	rna	ipa		1.96							1.81		1.74
384	IL-10 Signaling		ipa	rna	ipa									1.48		1.31
385	IL-12 Signaling and Production in Macrophages		ipa	prot	ipa		5.82		9.61
385	IL-12 Signaling and Production in Macrophages		ipa	rna	ipa		1.92							1.92		1.59
386	IL-15 Production		ipa	rna	ipa		5.27	1.45	4.16	2.1		2.02		7.56		6
386	IL-15 Production		ipa	prot	ipa	1.32
387	IL-15 Signaling		ipa	rna	ipa									1.67
388	IL-17 Signaling		ipa	rna	ipa	2.06		2.68
389	IL-17 signaling pathway	path:hsa04657	KEGG	metab	TOPO			3.44733		3.14327
390	IL-17A Signaling in Airway Cells		ipa	rna	ipa							3		3.7		3
391	IL-17A Signaling in Gastric Cells		ipa	rna	ipa	3.2		3.25
392	IL-2 Signaling		ipa	rna	ipa		1.61							1.31
393	IL-23 Signaling Pathway		ipa	rna	ipa		2.19					3.03		4.58		2.97
394	IL-3 Signaling		ipa	rna	ipa									2.54
395	IL-4 Signaling		ipa	rna	ipa		5.1		2.03			1.55		3.33		1.41
396	IL-6 Signaling		ipa	prot	ipa				1.96
396	IL-6 Signaling		ipa	rna	ipa							1.54		1.88		1.31
397	IL-7 Signaling Pathway		ipa	rna	ipa		2.68					1.67		3.74		2.81
398	IL-8 Signaling		ipa	rna	ipa		7.2		2.77	2.33		1.54		5.19		1.9
398	IL-8 Signaling		ipa	prot	ipa				2.68
399	IL-9 Signaling		ipa	rna	ipa		1.52					1.5		3.87
400	ILK Signaling		ipa	prot	ipa				3.36
400	ILK Signaling		ipa	rna	ipa		3.76		2.77					2.47
401	Immune System	R-HSA-168256	Reactome	lipid	ORA	3.08831		5.31605		4.84164
402	Immunoregulatory interactions between a Lymphoid and a non-Lymphoid cell	R-HSA-198933	Reactome	lipid	ORA			3.61439		3.4318
403	Immunoregulatory interactions between a Lymphoid and a non-Lymphoid cell	WP1829	Wikipathway	lipid	ORA			3.61439		3.4318
404	Incretin synthesis, secretion, and inactivation	WP2728	Wikipathway	lipid	ORA					2.62893
405	Indomethacin Action Pathway	SMP00104	SMPDB	lipid	ORA	2.05159		1.89963		1.7122
406	Induction of Apoptosis by HIV1		ipa	rna	ipa											1.34
407	Inflammasome pathway		ipa	rna	ipa		1.47
408	Inflammatory mediator regulation of TRP channels	path:hsa04750	KEGG	metab	TOPO	5.31605		4.34294
409	Inhibition of Angiogenesis by TSP1		ipa	prot	ipa				1.79
409	Inhibition of Angiogenesis by TSP1		ipa	rna	ipa		5.24		2.56					3.11		2
410	Inhibition of Matrix Metalloproteases		ipa	prot	ipa		2.48		2.3
410	Inhibition of Matrix Metalloproteases		ipa	rna	ipa		4.49	2.57	2.17					2.35
411	Innate Immune System	R-HSA-168249	Reactome	lipid	ORA	2.07572		3.14874		2.84164
412	iNOS Signaling		ipa	rna	ipa									1.68		1.64
413	Inositol Metabolism	SMP0000011	SMPDB	metab	MSEA	2.60206		3.32514
414	Insulin Receptor Signaling		ipa	rna	ipa							3.23		5.67		2.4
415	Insulin resistance	path:hsa04931	KEGG	metab	TOPO					1.34679
415	Insulin resistance	path:hsa04931	KEGG	lipid	ORA			2.80134		2.59346
416	Insulin secretion	path:hsa04911	KEGG	metab	TOPO			5.31605		2.07624
417	Insulin Secretion Signaling Pathway		ipa	rna	ipa		1.69		2.96		1.36	3.59		7.01		5.67
418	Integrin Signaling		ipa	prot	ipa				3.31
418	Integrin Signaling		ipa	rna	ipa		3.44		2.38				3.26	2.12	1.67		1.92
419	Intestinal immune network for IgA production	path:hsa04672	KEGG	metab	TOPO					5.31605
420	Intra-Golgi and retrograde Golgi-to-ER traffic	R-HSA-6811442	Reactome	lipid	ORA	3.38934		3.22475		3.03105
421	Intra-Golgi and retrograde Golgi-to-ER traffic	WP3842	Wikipathway	lipid	ORA	3.38934		3.22475		3.03105
422	Intrinsic Prothrombin Activation Pathway		ipa	prot	ipa		7.78		16.5
422	Intrinsic Prothrombin Activation Pathway		ipa	rna	ipa	2.41	2.34	3.41
423	Iron homeostasis signaling pathway		ipa	rna	ipa								1.48		1.59		1.61
424	JAK-STAT signaling pathway	path:hsa04630	KEGG	metab	TOPO					1.30892
425	JAK/Stat Signaling		ipa	rna	ipa							2.84		3.9		1.72
426	Kaposi sarcoma-associated herpesvirus infection	path:hsa05167	KEGG	lipid	ORA			3.88941		3.68613
426	Kaposi sarcoma-associated herpesvirus infection	path:hsa05167	KEGG	metab	TOPO			5.31605		5.31605
427	Kennedy pathway from Sphingolipids	WP3933	Wikipathway	lipid	ORA			3.01368		2.8041
428	Keratinization	R-HSA-6805567	Reactome	lipid	ORA			3.51999		3.33348
429	Keratinization	WP4087	Wikipathway	lipid	ORA			3.51999		3.33348
430	Ketogenesis		ipa	rna	ipa										1.52
431	Ketoprofen Action Pathway	SMP00085	SMPDB	lipid	ORA	2.05159		1.89963		1.7122
432	Ketorolac Action Pathway	SMP00098	SMPDB	lipid	ORA	2.05159		1.89963		1.7122
433	Kinetochore Metaphase Signaling Pathway		ipa	prot	ipa	2.32		2.38
433	Kinetochore Metaphase Signaling Pathway		ipa	rna	ipa							2.03			1.65
434	Krabbe disease	SMP00526	SMPDB	lipid	ORA	5.31605		5.31426		4.86328
435	L-DOPA Degradation		ipa	prot	ipa			1.68
436	Lactose Degradation	SMP0000457	SMPDB	metab	MSEA	2.34486		3.9431
437	Lactose Synthesis	SMP0000444	SMPDB	metab	MSEA	2.34486		3.9393
438	Lactosylceramide biosynthesis	mod:hsa_M00066	KEGG	metab	TOPO	5.31605		5.31605		5.31605
439	Leishmaniasis	path:hsa05140	KEGG	metab	TOPO	3.60906		5.12494		5.31605
440	Leptin Signaling in Obesity		ipa	rna	ipa		3.4		2.56					5.66		2.48
441	Leukocyte Extravasation Signaling		ipa	rna	ipa	1.51	15.5	2.06	9.78	2.38				6.5		1.82
441	Leukocyte Extravasation Signaling		ipa	prot	ipa		1.45		2.82
442	Leukocyte transendothelial migration	path:hsa04670	KEGG	metab	TOPO			5.31605
443	Leukotriene Biosynthesis		ipa	rna	ipa												1.31
444	Leukotriene C4 Synthesis Deficiency	SMP00353	SMPDB	lipid	ORA	2.05159		1.89963		1.7122
445	Linoleate metabolism	Linoleate metabolism	EHMN	lipid	ORA	2.87943		2.6968		2.48678
446	Linoleic acid metabolism	path:hsa00591	KEGG	metab	TOPO	3.15614		1.91721
447	Lipoate Biosynthesis and Incorporation II		ipa	rna	ipa											1.41
448	Long-term depression	path:hsa04730	KEGG	metab	TOPO	1.51145		5.31605		5.31605
449	Long-term potentiation	path:hsa04720	KEGG	metab	TOPO			1.84771		2.01323
450	Longevity regulating pathway	path:hsa04211	KEGG	metab	TOPO			3.19928
451	Lornoxicam Action Pathway	SMP00700	SMPDB	lipid	ORA	2.05159		1.89963		1.7122
452	LPS-stimulated MAPK Signaling		ipa	rna	ipa									1.91		1.53
453	LPS/IL-1 Mediated Inhibition of RXR Function		ipa	prot	ipa		2.47		1.85
453	LPS/IL-1 Mediated Inhibition of RXR Function		ipa	rna	ipa	1.62	1.32	5.09
454	Lumiracoxib Action Pathway	SMP00699	SMPDB	lipid	ORA	2.05159		1.89963		1.7122
455	LXR/RXR Activation		ipa	prot	ipa		24		32.1
455	LXR/RXR Activation		ipa	rna	ipa		1.49	2.01
456	Lymphotoxin β Receptor Signaling		ipa	rna	ipa							3.4		5.11		3.62
457	Lysine Degradation II		ipa	rna	ipa							1.48
458	Lysosome	path:hsa04142	KEGG	metab	TOPO	5.31605		5.31605		1.75203
459	Macropinocytosis Signaling		ipa	rna	ipa		4.26			1.56				3.57
460	Magnesium salicylate Action Pathway	SMP00698	SMPDB	lipid	ORA	2.05159		1.89963		1.7122
461	MAPK signaling pathway	path:hsa04010	KEGG	metab	TOPO			5.31605		2.9393
462	Maturity Onset Diabetes of Young (MODY) Signaling		ipa	prot	ipa		2.58		5.99
462	Maturity Onset Diabetes of Young (MODY) Signaling		ipa	rna	ipa				2.39
463	Measles	path:hsa05162	KEGG	metab	TOPO			4.86967		5.31605
464	Mechanisms of Viral Exit from Host Cells		ipa	rna	ipa								2.52		1.78
465	Mefenamic Acid Action Pathway	SMP00109	SMPDB	lipid	ORA	2.05159		1.89963		1.7122
466	Melanocyte Development and Pigmentation Signaling		ipa	rna	ipa									2.21
467	Melanoma	path:hsa05218	KEGG	metab	TOPO			2.56703		3.31695
468	Melatonin Degradation I		ipa	rna	ipa	2.63		3.57
469	Melatonin Degradation II		ipa	rna	ipa		1.34
470	Melatonin Degradation III		ipa	prot	ipa			1.98
471	Melatonin Signaling		ipa	rna	ipa									1.35
472	Meloxicam Action Pathway	SMP00106	SMPDB	lipid	ORA	2.05159		1.89963		1.7122
473	Membrane Trafficking	R-HSA-199991	Reactome	lipid	ORA	4.29414		4.00524		3.69465
474	Metabolism	R-HSA-1430728	Reactome	lipid	ORA	2.54975		3.51145		4.03386
475	Metabolism of fat-soluble vitamins	R-HSA-6806667	Reactome	lipid	ORA			2.52288		3.69465
476	Metabolism of lipids	R-HSA-556833	Reactome	lipid	ORA	4.38091		5.31605		5.31605
477	Metabolism of proteins	R-HSA-392499	Reactome	lipid	ORA			1.88273		1.5986
478	Metabolism of vitamins and cofactors	R-HSA-196854	Reactome	lipid	ORA			1.43415		2.05159
479	Metachromatic Leukodystrophy (MLD)	SMP00347	SMPDB	lipid	ORA	5.31605		5.31426		4.86328
480	Methionine Metabolism	SMP0000033	SMPDB	metab	MSEA			2.92812
481	Methylglyoxal Degradation III		ipa	rna	ipa								1.35		2.4		2
482	Methylhistidine Metabolism	SMP0000715	SMPDB	metab	MSEA	3.58336		2.86967
483	Mevalonate Pathway I		ipa	rna	ipa								1.92		1.77		1.97
484	Mismatch Repair in Eukaryotes		ipa	rna	ipa							2.07		1.97		2.18
485	Mitochondrial Dysfunction		ipa	rna	ipa								22.6		30.7		23.4
486	Mitochondrial L-carnitine Shuttle Pathway		ipa	rna	ipa						1.64
487	Mitophagy - animal	path:hsa04137	KEGG	metab	TOPO			5.31605		5.31605
488	Mitotic Roles of Polo-Like Kinase		ipa	prot	ipa			1.5
488	Mitotic Roles of Polo-Like Kinase		ipa	rna	ipa							2.91		1.77		1.56
489	Molecular Mechanisms of Cancer		ipa	rna	ipa		1.84			1.33		7.95		11.6		8.4
490	Morphine addiction	path:hsa05032	KEGG	metab	TOPO					5.31605
491	Mouse Embryonic Stem Cell Pluripotency		ipa	rna	ipa							4.71		4.76		3.65
492	MSP-RON Signaling In Cancer Cells Pathway		ipa	rna	ipa			3.03				2.66		2.85		1.97
493	MSP-RON Signaling In Macrophages Pathway		ipa	prot	ipa				2.79
493	MSP-RON Signaling In Macrophages Pathway		ipa	rna	ipa		3.97	1.56
494	MSP-RON Signaling Pathway		ipa	rna	ipa	1.91	3.13	2.76	1.6	3
495	MTHFR deficiency	WP4288	Wikipathway	lipid	ORA	4.84164		7.25571		6.82102
496	mTOR Signaling		ipa	rna	ipa								7.88		9.79		8.33
497	mTOR signaling pathway	path:hsa04150	KEGG	metab	TOPO					1.34294
498	Nabumetone Action Pathway	SMP00114	SMPDB	lipid	ORA	2.05159		1.89963		1.7122
499	NADH Repair		ipa	rna	ipa								1.5		2.81		1.52
500	Naproxen Action Pathway	SMP00120	SMPDB	lipid	ORA	2.05159		1.89963		1.7122
501	Natural killer cell mediated cytotoxicity	path:hsa04650	KEGG	metab	TOPO			5.31605		5.31605
502	Natural Killer Cell Signaling		ipa	rna	ipa		9.35		3.55			2.25		7.16		4.48
503	Necroptosis	path:hsa04217	KEGG	metab	TOPO	3.70774		2.06298		2.03858
503	Necroptosis	path:hsa04217	KEGG	lipid	ORA	3.51999		3.36051		3.16494
504	Necroptosis Signaling Pathway		ipa	rna	ipa								1.34		2.68	1.49	2.54
505	Nepafenac Action Pathway	SMP00702	SMPDB	lipid	ORA	2.05159		1.89963		1.7122
506	NER Pathway		ipa	rna	ipa							4.29	2.24	2.97	2.84	2.66	2.39
507	Netrin Signaling		ipa	rna	ipa		2.18		2.59					2.17		4.31
508	Neuregulin Signaling		ipa	rna	ipa							3.01		4.92		3.13
509	Neuroactive ligand-receptor interaction	path:hsa04080	KEGG	metab	TOPO			2.0348
510	Neuroinflammation Signaling Pathway		ipa	rna	ipa		8.3	1.43	2.56	2.46		2.13		5.71		4.11
511	Neuropathic Pain Signaling In Dorsal Horn Neurons		ipa	rna	ipa		1.91	2.39	2.54			2.32		5.86		3.84
512	Neuroprotective Role of THOP1 in Alzheimer's Disease		ipa	prot	ipa		4		9.03
512	Neuroprotective Role of THOP1 in Alzheimer's Disease		ipa	rna	ipa			3.44
513	Neurotrophin signaling pathway	path:hsa04722	KEGG	lipid	ORA			3.88941		3.68613
513	Neurotrophin signaling pathway	path:hsa04722	KEGG	metab	TOPO	5.31605		5.31605		5.31605
514	Neurotrophin/TRK Signaling		ipa	rna	ipa									1.87		1.45
515	NF-kappa B signaling pathway	path:hsa04064	KEGG	metab	TOPO			5.31605		5.31605
516	NF-κB Activation by Viruses		ipa	rna	ipa		1.99					2.1		5.34		3.01
517	NF-κB Signaling		ipa	rna	ipa		5.07		1.63	3.45		3.7		7.27		6.36
518	NGF Signaling		ipa	rna	ipa							3.03		3.93		3.02
519	Nicotinate and Nicotinamide Metabolism	SMP0000048	SMPDB	metab	MSEA	2.12321
520	Nicotine addiction	path:hsa05033	KEGG	metab	TOPO			1.63264
521	Nicotine Degradation II		ipa	rna	ipa	1.74		3.38
522	Nicotine Degradation III		ipa	rna	ipa	1.94		2.8
523	Nitric Oxide Signaling in the Cardiovascular System		ipa	rna	ipa		6.6		6.8	2.34		2.78		5.69		3.32
523	Nitric Oxide Signaling in the Cardiovascular System		ipa	prot	ipa				2.64
524	nNOS Signaling in Neurons		ipa	prot	ipa				1.33
524	nNOS Signaling in Neurons		ipa	rna	ipa	1.45								1.5		1.81
525	nNOS Signaling in Skeletal Muscle Cells		ipa	prot	ipa		1.56		1.52
525	nNOS Signaling in Skeletal Muscle Cells		ipa	rna	ipa		1.47		3.2			1.59		1.72		4.54
526	NOD-like receptor signaling pathway	path:hsa04621	KEGG	metab	TOPO					1.6038
527	Non-alcoholic fatty liver disease	path:hsa04932	KEGG	metab	TOPO			2.13253
528	Non-small cell lung cancer	path:hsa05223	KEGG	metab	TOPO					5.31605
529	Non-Small Cell Lung Cancer Signaling		ipa	rna	ipa							3.06		3.14		2.58
530	Noradrenaline and Adrenaline Degradation		ipa	prot	ipa			2.24
530	Noradrenaline and Adrenaline Degradation		ipa	rna	ipa			1.82					2.02		2.83		1.62
531	Notch Signaling		ipa	rna	ipa									1.77
532	NRF2-mediated Oxidative Stress Response		ipa	prot	ipa	1.41
532	NRF2-mediated Oxidative Stress Response		ipa	rna	ipa								4.05		6.97		6.72
533	Nucleotide Excision Repair Pathway		ipa	rna	ipa							1.33	2.55		2.83		2.65
534	Nur77 Signaling in T Lymphocytes		ipa	rna	ipa		2.88		1.97					2.23
535	Oligodendrocyte Specification and differentiation(including remyelination), leading to Myelin Components for CNS	WP4304	Wikipathway	lipid	ORA	3.68613		5.31605		5.29243
536	Oncostatin M Signaling		ipa	rna	ipa					2.03
537	One carbon metabolism and related pathways	WP3940	Wikipathway	lipid	ORA			2.25571		2.05159
538	Oocyte meiosis	path:hsa04114	KEGG	metab	TOPO			2.11464		1.66154
539	Opioid Signaling Pathway		ipa	prot	ipa				1.55
539	Opioid Signaling Pathway		ipa	rna	ipa		5.7		4.89					2.41		2.7
540	Opioid Signalling	R-HSA-111885	Reactome	lipid	ORA	2.87943		4.27165		3.9431
541	Opioid Signalling	WP1978	Wikipathway	lipid	ORA	2.9431		4.37366		4.04383
542	Osteoarthritis Pathway		ipa	rna	ipa		5.2	2.74	3.08	2.18		3.3		6.28		3.73
542	Osteoarthritis Pathway		ipa	prot	ipa			1.55	1.92
543	Osteoclast differentiation	path:hsa04380	KEGG	metab	TOPO			3.31695		2.88941
544	Other glycan degradation	path:hsa00511	KEGG	metab	TOPO	3.08938		3.44977		3.28567
545	Ovarian Cancer Signaling		ipa	rna	ipa		1.46			1.93		4.59		3.92		2.4
546	Ovarian steroidogenesis	path:hsa04913	KEGG	metab	TOPO	3.88606		1.9431
547	OX40 Signaling Pathway		ipa	rna	ipa		3.69		1.84
548	Oxaprozin Action Pathway	SMP00113	SMPDB	lipid	ORA	2.05159		1.89963		1.7122
549	Oxidative Phosphorylation		ipa	rna	ipa								30.5		36.9		29.2
550	Oxytocin signaling pathway	path:hsa04921	KEGG	metab	TOPO			2.88941		2.73049
551	P2Y Purigenic Receptor Signaling Pathway		ipa	prot	ipa				1.51
551	P2Y Purigenic Receptor Signaling Pathway		ipa	rna	ipa		3.18		1.91					4.04		1.67
552	p38 MAPK Signaling		ipa	rna	ipa							1.91		1.66		3.33
553	p53 Signaling		ipa	rna	ipa							6.68		4.55		2.44
554	p70S6K Signaling		ipa	rna	ipa		1.5							3.23		1.57
555	p75 NTR receptor-mediated signalling	R-HSA-193704	Reactome	lipid	ORA	3.59517		3.4318		3.24718
556	p75 NTR receptor-mediated signalling	WP4443	Wikipathway	lipid	ORA	3.59517		3.4318		3.24718
557	PAK Signaling		ipa	prot	ipa				1.93
557	PAK Signaling		ipa	rna	ipa		3.55		1.62					2.72		1.43
558	Pancreatic Adenocarcinoma Signaling		ipa	rna	ipa							3.76		4.46		2.51
559	Pancreatic cancer	path:hsa05212	KEGG	metab	TOPO			4.79048		4.76447
560	Pancreatic secretion	path:hsa04972	KEGG	metab	TOPO			5.31605
561	Parathyroid hormone synthesis, secretion and action	path:hsa04928	KEGG	metab	TOPO			2.06702
562	Parkinson disease	path:hsa05012	KEGG	metab	TOPO					4.48812
563	Parkinson's Signaling		ipa	prot	ipa		1.58
564	Pathogenesis of Multiple Sclerosis		ipa	rna	ipa		5.72		1.62	1.52				1.58
565	Pathogenic Escherichia coli infection	path:hsa05130	KEGG	metab	TOPO			5.31605		1.4908
566	Pathways in cancer	path:hsa05200	KEGG	metab	TOPO					1.78781
567	Pathways of neurodegeneration - multiple diseases	path:hsa05022	KEGG	metab	TOPO	5.04624		3.54061
568	Paxillin Signaling		ipa	prot	ipa				1.88
568	Paxillin Signaling		ipa	rna	ipa		3.02							3.83		1.78
569	PCP pathway		ipa	rna	ipa					1.76
570	PD-1, PD-L1 cancer immunotherapy pathway		ipa	rna	ipa		10.9		4.57			2.31		5.2		2.16
571	PD-L1 expression and PD-1 checkpoint pathway in cancer	path:hsa05235	KEGG	metab	TOPO			5.31605		5.31605
572	PDGF Signaling		ipa	rna	ipa							3.08		4.39		2.15
573	PEDF Signaling		ipa	rna	ipa				1.42					2.59		3.15
574	Pertussis	path:hsa05133	KEGG	metab	TOPO			5.31605
575	Phagosome Formation		ipa	rna	ipa		16.4		6.99	2.97		1.69		9.08		3.08
575	Phagosome Formation		ipa	prot	ipa				3.89
576	Phagosome Maturation		ipa	prot	ipa				1.5
576	Phagosome Maturation		ipa	rna	ipa								9.51		5.15		6.81
577	Phenylbutazone Action Pathway	SMP00701	SMPDB	lipid	ORA	2.05159		1.89963		1.7122
578	Phosphatidylcholine Biosynthesis	SMP0014212	SMPDB	metab	MSEA	3.58336
579	Phosphatidylethanolamine (PE) biosynthesis, PA => PS => PE	mod:hsa_M00093	KEGG	metab	TOPO			1.7122
580	Phosphatidylethanolamine Biosynthesis	SMP0029731	SMPDB	metab	MSEA			2.92812
581	Phosphatidylglycerol Biosynthesis II (Non-plastidic)		ipa	rna	ipa								2.6		1.79		1.49
582	phospho-PLA2 pathway	R-HSA-111995	Reactome	lipid	ORA	3.78516		3.61439		3.4318
583	Phospholipase C Signaling		ipa	prot	ipa				5.49
583	Phospholipase C Signaling		ipa	rna	ipa		10.5		7.73					4.93		2.62
584	Phospholipase D signaling pathway	path:hsa04072	KEGG	metab	TOPO	1.32883		4.47366		4.84164
585	phospholipases	LIPASYN-PWY	HUMCYC	lipid	ORA					2.25571
586	Phospholipases		ipa	rna	ipa				1.31					1.57		1.93
587	Phospholipid Biosynthesis	SMP0000025	SMPDB	lipid	ORA	2.9431		5.39469		5.31605
587	Phospholipid Biosynthesis	SMP0000025	SMPDB	metab	MSEA			3.27165
588	Phospholipid metabolism	R-HSA-1483257	Reactome	lipid	ORA	1.97062		4.22113		3.76955
589	Phototransduction Pathway		ipa	rna	ipa				2.37
590	PI3K Signaling in B Lymphocytes		ipa	prot	ipa				1.33
590	PI3K Signaling in B Lymphocytes		ipa	rna	ipa		4.16		4.16					2.83		1.76
591	PI3K-Akt signaling pathway	path:hsa04151	KEGG	metab	TOPO	1.87615		1.98297		5.31605
592	PI3K/AKT Signaling		ipa	rna	ipa		1.89					3.13		6.01		3.98
593	Piroxicam Action Pathway	SMP00077	SMPDB	lipid	ORA	2.05159		1.89963		1.7122
594	PKCθ Signaling in T Lymphocytes		ipa	rna	ipa		10.4		4.17			2.08		4.74		4.42
595	Plasma lipoprotein assembly, remodeling, and clearance	R-HSA-174824	Reactome	lipid	ORA	4.61083		5.35556		5.31605
596	Plasma lipoprotein assembly, remodeling, and clearance	WP4129	Wikipathway	lipid	ORA	4.88941		5.6968		5.32514
597	Plasma lipoprotein remodeling	R-HSA-8963899	Reactome	lipid	ORA	4.88941		5.6968		5.32514
598	Plasmalogen Synthesis	SMP0000479	SMPDB	metab	MSEA			2.82974
599	Platelet activation	path:hsa04611	KEGG	metab	TOPO			1.68613		1.56225
600	PLC beta mediated events	R-HSA-112043	Reactome	lipid	ORA	3.05651		4.55284		4.22695
601	Porphyrin Metabolism	SMP0000024	SMPDB	metab	MSEA	1.74232
602	Post-translational modification: synthesis of GPI-anchored proteins	R-HSA-163125	Reactome	lipid	ORA			2.87943		2.66959
603	Post-translational protein modification	R-HSA-597592	Reactome	lipid	ORA			1.43415
604	PPAR Signaling		ipa	rna	ipa							2.37		1.97		2.23
605	PPARα/RXRα Activation		ipa	rna	ipa							3.28		5.68		5.26
606	Primary immunodeficiency	path:hsa05340	KEGG	metab	TOPO	3.60033		3.51004		5.31605
607	Primary Immunodeficiency Signaling		ipa	prot	ipa				2.51
607	Primary Immunodeficiency Signaling		ipa	rna	ipa		14.7		10.9
608	Prion disease	path:hsa05020	KEGG	metab	TOPO			5.31605
609	Production of Nitric Oxide and Reactive Oxygen Species in Macrophages		ipa	rna	ipa		2.83		1.65	1.58				2.75		1.63
609	Production of Nitric Oxide and Reactive Oxygen Species in Macrophages		ipa	prot	ipa		4.95		8.18
610	Prolactin Signaling		ipa	rna	ipa							3.13		6.54		2.55
611	Proline Biosynthesis I		ipa	prot	ipa			3.19
612	Proline Biosynthesis II (from Arginine)		ipa	prot	ipa			2.97
613	Prostanoid Biosynthesis		ipa	prot	ipa		1.98		1.49
614	Prostate Cancer Signaling		ipa	rna	ipa							2.05		2.44		2.37
615	Proteasome	path:hsa03050	KEGG	metab	TOPO			3.26281		1.39254
616	Protein digestion and absorption	path:hsa04974	KEGG	metab	TOPO			5.31605
617	Protein Kinase A Signaling		ipa	prot	ipa		1.91		4.77
617	Protein Kinase A Signaling		ipa	rna	ipa		5.4		6.58			2.36		7.65		5.97
618	Protein Ubiquitination Pathway		ipa	rna	ipa							1.63	4.3		8.38		4.66
619	PTEN Signaling		ipa	rna	ipa		3.47			2.93		2.82		7.69		5.52
620	Pterine Biosynthesis	SMP0000005	SMPDB	metab	MSEA			5.59517
621	Purine degradation, xanthine => urea	mod:hsa_M00546	KEGG	metab	TOPO	4.14935		2.22768
622	Purine Metabolism	SMP0000050	SMPDB	metab	MSEA	2.05159		5.31605
623	Pyrimidine Deoxyribonucleotides De Novo Biosynthesis I		ipa	prot	ipa		1.33	1.66
623	Pyrimidine Deoxyribonucleotides De Novo Biosynthesis I		ipa	rna	ipa								4.44		2		2.28
624	Pyrimidine Metabolism	SMP0000046	SMPDB	metab	MSEA			5.84466
625	Pyrimidine Ribonucleotides De Novo Biosynthesis		ipa	rna	ipa						1.33	1.72	3.77		1.8		1.62
626	Pyrimidine Ribonucleotides Interconversion		ipa	rna	ipa						1.36		4.06		1.97		1.77
627	Rac Signaling		ipa	rna	ipa		1.49	1.45		2.1		1.53		3.94		1.34
628	RAN Signaling		ipa	rna	ipa							1.35
629	RANK Signaling in Osteoclasts		ipa	rna	ipa		1.43					3.2		4.85		4.77
630	Rap1 signaling pathway	path:hsa04015	KEGG	metab	TOPO			5.31605		5.31605
631	RAR Activation		ipa	prot	ipa		1.44
631	RAR Activation		ipa	rna	ipa							2.16		4.78		3.84
632	Ras signaling pathway	path:hsa04014	KEGG	metab	TOPO			5.31605		2.21183
633	Reelin Signaling in Neurons		ipa	rna	ipa		5.2		4.1					3.21		1.49
634	Regulation of actin cytoskeleton	path:hsa04810	KEGG	metab	TOPO			3.98716
635	Regulation of Actin-based Motility by Rho		ipa	prot	ipa				2
635	Regulation of Actin-based Motility by Rho		ipa	rna	ipa		2.16		1.72				3.34		1.85		1.74
636	Regulation of Cellular Mechanics by Calpain Protease		ipa	prot	ipa	1.87		2.12	1.7
637	Regulation of eIF4 and p70S6K Signaling		ipa	rna	ipa								7.61		10.5		9.56
638	Regulation of IL-2 Expression in Activated and Anergic T Lymphocytes		ipa	rna	ipa		3.69		2.22					3.18		2.15
639	Regulation of lipolysis in adipocytes	path:hsa04923	KEGG	metab	TOPO			1.31158		3.7122
640	Regulation Of The Epithelial Mesenchymal Transition By Growth Factors Pathway		ipa	rna	ipa		6.65		3.18			2.91		8.18		6.94
641	Regulation Of The Epithelial Mesenchymal Transition In Development Pathway		ipa	rna	ipa	1.39	1.97	2.07		1.48		3.25		5.09		2.62
642	Regulation of the Epithelial-Mesenchymal Transition Pathway		ipa	rna	ipa		3.34		2.11	1.57		4.7		8.49		5.84
643	Relaxin Signaling		ipa	prot	ipa				2.83
643	Relaxin Signaling		ipa	rna	ipa		6.44		5.77					2.02		1.38
644	Relaxin signaling pathway	path:hsa04926	KEGG	metab	TOPO			5.31605		5.31605
645	Remodeling of Epithelial Adherens Junctions		ipa	prot	ipa				1.33
645	Remodeling of Epithelial Adherens Junctions		ipa	rna	ipa								1.94		1.64		2.45
646	Renal Cell Carcinoma Signaling		ipa	rna	ipa								1.37	2.45	1.39	1.46
647	Renin secretion	path:hsa04924	KEGG	metab	TOPO					2.74715
648	Renin-Angiotensin Signaling		ipa	rna	ipa		2.19	1.49						3.24		2.18
649	Renin-angiotensin system	path:hsa04614	KEGG	metab	TOPO			4.38934
650	Retinoate Biosynthesis I		ipa	rna	ipa										1.88
651	Retinoate Biosynthesis II		ipa	rna	ipa		1.34		1.53
652	Retinoid metabolism and transport	WP3839	Wikipathway	lipid	ORA			2.5784		2.36151
653	Retinoid metabolism and transport Reactome	R-HSA-975634	Reactome	lipid	ORA			2.63078		3.85699
654	retinol biosynthesis	PWY-6857	HUMCYC	lipid	ORA					2.52143
655	Retinol Biosynthesis		ipa	prot	ipa				2.07
656	Retinol Metabolism	SMP0000074	SMPDB	metab	MSEA			3.44491
657	Retrograde endocannabinoid signaling	path:hsa04723	KEGG	lipid	ORA			4.55284		4.22695
657	Retrograde endocannabinoid signaling	path:hsa04723	KEGG	metab	TOPO	1.86646		5.31605		4.37366
658	RhoA Signaling		ipa	prot	ipa		1.33		2.52
658	RhoA Signaling		ipa	rna	ipa	1.38								2.3		1.88	1.31
659	RhoGDI Signaling		ipa	prot	ipa				3.39
659	RhoGDI Signaling		ipa	rna	ipa		6.15		3.87				1.54	3.23		2
660	RIG-I-like receptor signaling pathway	path:hsa04622	KEGG	metab	TOPO					1.38934
661	Rofecoxib Action Pathway	SMP00087	SMPDB	lipid	ORA	2.05159		1.89963		1.7122
662	Role of BRCA1 in DNA Damage Response		ipa	rna	ipa							12.4		7.82		8.85
663	Role of CHK Proteins in Cell Cycle Checkpoint Control		ipa	rna	ipa							2.14
664	Role of Cytokines in Mediating Communication between Immune Cells		ipa	rna	ipa			1.33
665	Role of IL-17A in Arthritis		ipa	rna	ipa	1.99		2.86
666	Role of IL-17A in Psoriasis		ipa	prot	ipa			3.43
666	Role of IL-17A in Psoriasis		ipa	rna	ipa	4.31		4.36
667	Role of JAK family kinases in IL-6-type Cytokine Signaling		ipa	rna	ipa		1.6			2.49				2.55		1.36
668	Role of JAK1 and JAK3 in γc Cytokine Signaling		ipa	rna	ipa		2.37							2.14
669	Role of JAK2 in Hormone-like Cytokine Signaling		ipa	rna	ipa							1.82		3.11
670	Role of Macrophages, Fibroblasts and Endothelial Cells in Rheumatoid Arthritis		ipa	rna	ipa		9.56	2.1	4.51	4.04		4.07		8.41		5.24
670	Role of Macrophages, Fibroblasts and Endothelial Cells in Rheumatoid Arthritis		ipa	prot	ipa				3.06
671	Role of NANOG in Mammalian Embryonic Stem Cell Pluripotency		ipa	rna	ipa					2.12		3		2.06		1.87
672	Role of NFAT in Cardiac Hypertrophy		ipa	prot	ipa				1.66
672	Role of NFAT in Cardiac Hypertrophy		ipa	rna	ipa		3.72		2.96			2.4		8.67		7.65
673	Role of NFAT in Regulation of the Immune Response		ipa	rna	ipa		13.1		9					3.01		1.77
674	Role of Oct4 in Mammalian Embryonic Stem Cell Pluripotency		ipa	rna	ipa							1.93		2.74		1.56
675	Role of Osteoblasts, Osteoclasts and Chondrocytes in Rheumatoid Arthritis		ipa	rna	ipa		5.3	1.76	1.49	3.07		5.14		5.82		4.39
676	Role of p14/p19ARF in Tumor Suppression		ipa	rna	ipa							1.9		1.92
677	Role of Pattern Recognition Receptors in Recognition of Bacteria and Viruses		ipa	rna	ipa		4.88			2.74				4.83		2.75
678	Role of phospholipids in phagocytosis	R-HSA-2029485	Reactome	lipid	ORA			2.96257		2.75449
679	Role of RIG1-like Receptors in Antiviral Innate Immunity		ipa	rna	ipa											1.73
680	Role of Tissue Factor in Cancer		ipa	rna	ipa		1.65							2.01
681	Role of Wnt/GSK-3β Signaling in the Pathogenesis of Influenza		ipa	rna	ipa					1.54
682	Salicylate-sodium Action Pathway	SMP00708	SMPDB	lipid	ORA	2.05159		1.89963		1.7122
683	Salicylic Acid Action Pathway	SMP00709	SMPDB	lipid	ORA	2.05159		1.89963		1.7122
684	Salivary secretion	path:hsa04970	KEGG	metab	TOPO			2.44855
685	Salmonella infection	path:hsa05132	KEGG	metab	TOPO			2.05159		2.20135
686	Salsalate Action Pathway	SMP00707	SMPDB	lipid	ORA	2.05159		1.89963		1.7122
687	Salvage Pathways of Pyrimidine Deoxyribonucleotides		ipa	rna	ipa				2.79
688	SAPK/JNK Signaling		ipa	rna	ipa		2.2					1.71		2.45		1.89
689	Selenoamino Acid Metabolism	SMP0000029	SMPDB	metab	MSEA			2.92812
690	Semaphorin Neuronal Repulsive Signaling Pathway		ipa	prot	ipa		3.4		6.95
690	Semaphorin Neuronal Repulsive Signaling Pathway		ipa	rna	ipa		6.36		2.52			1.88		6.86		3.52
691	Semaphorin Signaling in Neurons		ipa	prot	ipa		1.82		2.78
691	Semaphorin Signaling in Neurons		ipa	rna	ipa		2.05							1.97		1.41
692	Senescence Pathway		ipa	rna	ipa							7.65		5.63		5.42
693	Serotonin Degradation		ipa	prot	ipa			1.48
693	Serotonin Degradation		ipa	rna	ipa	1.7		3.31					3.28		2.87		1.73
694	Serotonin Receptor Signaling		ipa	rna	ipa		1.36
695	Sertoli Cell-Sertoli Cell Junction Signaling		ipa	prot	ipa		1.9		5.42
695	Sertoli Cell-Sertoli Cell Junction Signaling		ipa	rna	ipa		2.37		1.78					2.47		1.97
696	Signal Transduction	R-HSA-162582	Reactome	lipid	ORA	4.25727		5.39469		6.82102
697	Signaling by GPCR	R-HSA-372790	Reactome	lipid	ORA	2.34872		4.20066		5.31605
698	Signaling by Rho Family GTPases		ipa	prot	ipa				4.8
698	Signaling by Rho Family GTPases		ipa	rna	ipa		6.15		4.65					3.33
699	Signaling pathways regulating pluripotency of stem cells	path:hsa04550	KEGG	metab	TOPO			5.31605		1.40561
700	Sirtuin Signaling Pathway		ipa	prot	ipa			1.47
700	Sirtuin Signaling Pathway		ipa	rna	ipa								14.1		17.7		15.4
701	Small cell lung cancer	path:hsa05222	KEGG	metab	TOPO					5.31605
702	Small Cell Lung Cancer Signaling		ipa	rna	ipa							3.68		4.67		3.97
703	Sonic Hedgehog Signaling		ipa	rna	ipa		1.81							2.39		1.34
704	Sorbitol Degradation I		ipa	prot	ipa	2.17		1.98
704	Sorbitol Degradation I		ipa	rna	ipa	1.81		1.83
705	Sperm Motility		ipa	rna	ipa	2.1	8.85	2.69	8.78	1.4		2.24		9.98		9.38
706	Sphingolipid de novo biosynthesis	R-HSA-1660661	Reactome	lipid	ORA	4.22621		6.44977		7.25571
707	Sphingolipid metabolism	path:hsa00600	KEGG	lipid	ORA	4.51286		4.22695		3.89963
707	Sphingolipid Metabolism	SMP0000034	SMPDB	lipid	ORA	5.31605		5.31426		4.86328
707	Sphingolipid metabolism	path:hsa00600	KEGG	metab	TOPO	5.31605		5.31605		5.31605
707	Sphingolipid metabolism	WP2788	Wikipathway	lipid	ORA	5.07676		6.82102		6.25181
707	Sphingolipid metabolism	R-HSA-428157	Reactome	lipid	ORA	4.99568		6.82102		7.25571
707	Sphingolipid Metabolism	SMP0000034	SMPDB	metab	MSEA	2.34486		4.92445
708	Sphingolipid pathway	WP1422	Wikipathway	lipid	ORA	5.11464		4.84164		4.51286
709	Sphingolipid signaling pathway	path:hsa04071	KEGG	lipid	ORA	3.17587		4.76447		4.42946
709	Sphingolipid signaling pathway	path:hsa04071	KEGG	metab	TOPO	3.42136		3.41341		5.31605
710	sphingomyelin metabolism/ceramide salvage	PWY3DJ-11281	HUMCYC	lipid	ORA					2.2815
711	sphingosine and sphingosine-1-phosphate metabolism	PWY3DJ-11470	HUMCYC	lipid	ORA					2.10347
712	Sphingosine and Sphingosine-1-phosphate Metabolism		ipa	rna	ipa								2.2		2.06		2.25
713	Sphingosine biosynthesis	mod:hsa_M00099	KEGG	metab	TOPO	1.9431				2.06148
714	Sphingosine-1-phosphate Signaling		ipa	rna	ipa		4.16		2.26					1.94
715	SPINK1 General Cancer Pathway		ipa	prot	ipa				3.8
715	SPINK1 General Cancer Pathway		ipa	rna	ipa				2.84				2.26		1.94		1.63
716	SPINK1 Pancreatic Cancer Pathway		ipa	rna	ipa	1.86		2.69		1.76
716	SPINK1 Pancreatic Cancer Pathway		ipa	prot	ipa				1.53
717	Spinocerebellar ataxia	path:hsa05017	KEGG	metab	TOPO			5.31605		5.31605
718	Spliceosome	path:hsa03040	KEGG	metab	TOPO			3.98716		3.90309
719	Starch and Sucrose Metabolism	SMP0000058	SMPDB	metab	MSEA	2.60206		3.32514
720	STAT3 Pathway		ipa	rna	ipa		6.18		1.39					4.63		4.51
721	Statin Pathway	WP430	Wikipathway	lipid	ORA			3.29158		3.09259
722	Stearate Biosynthesis I (Animals)		ipa	rna	ipa								1.9		3.52
723	Sucrose Degradation V (Mammalian)		ipa	rna	ipa								4.03		3.83		2.03
724	Sulfoglycolipids biosynthesis, ceramide/1-alkyl-2-acylglycerol => sulfatide/seminolipid	mod:hsa_M00067	KEGG	metab	TOPO	1.36251
725	Sulindac Action Pathway	SMP00094	SMPDB	lipid	ORA	2.05159		1.89963		1.7122
726	Sumoylation Pathway		ipa	rna	ipa									1.85		1.59
727	Superoxide Radicals Degradation		ipa	prot	ipa				1.68
727	Superoxide Radicals Degradation		ipa	rna	ipa			2.23									1.38
728	Superpathway of Cholesterol Biosynthesis		ipa	rna	ipa										1.83
729	Superpathway of Citrulline Metabolism		ipa	rna	ipa			1.69
730	Superpathway of D-myo-inositol (1,4,5)-trisphosphate Metabolism		ipa	rna	ipa									1.39
731	Superpathway of Geranylgeranyldiphosphate Biosynthesis I (via Mevalonate)		ipa	rna	ipa								1.44		1.88		2.12
732	Superpathway of Inositol Phosphate Compounds		ipa	rna	ipa							1.96		5.6		1.75
733	Superpathway of Melatonin Degradation		ipa	rna	ipa	2.48		3.38
734	Suprofen Action Pathway	SMP00101	SMPDB	lipid	ORA	2.05159		1.89963		1.7122
735	Synaptic Long Term Depression		ipa	rna	ipa		2.26		3.87					3.48		5.44
736	Synaptic Long Term Potentiation		ipa	rna	ipa			1.35						1.5		1.37
737	Synaptic vesicle cycle	path:hsa04721	KEGG	metab	TOPO	3.51004		5.31605
738	Synaptogenesis Signaling Pathway		ipa	prot	ipa		1.93		3.09
738	Synaptogenesis Signaling Pathway		ipa	rna	ipa		7.64	1.34	6.78					6.47		5.11
739	Synthesis of glycosylphosphatidylinositol (GPI)	R-HSA-162710	Reactome	lipid	ORA			3.01368		2.8041
740	Synthesis of PC	R-HSA-1483191	Reactome	lipid	ORA			4.32148		3.9914
740	Phosphatidylcholine (PC) biosynthesis, choline => PC	mod:hsa_M00090	KEGG	metab	TOPO	1.72816		1.46597
741	Synthesis of PE	R-HSA-1483213	Reactome	lipid	ORA			2.84164		2.62893
741	Phosphatidylethanolamine (PE) biosynthesis, ethanolamine => PE	mod:hsa_M00092	KEGG	metab	TOPO	1.4908
742	Synthesis of PS	R-HSA-1483101	Reactome	lipid	ORA			3.88941		3.68613
743	Systemic lupus erythematosus	path:hsa05322	KEGG	metab	TOPO			1.43415
744	Systemic Lupus Erythematosus In B Cell Signaling Pathway		ipa	rna	ipa		10.8		3.54			1.9		5.09		2.8
745	Systemic Lupus Erythematosus In T Cell Signaling Pathway		ipa	rna	ipa		4.59		1.45
746	Systemic Lupus Erythematosus Signaling		ipa	prot	ipa				2.97
746	Systemic Lupus Erythematosus Signaling		ipa	rna	ipa		5.49		3.77
747	T Cell Exhaustion Signaling Pathway		ipa	rna	ipa		11.9		3.31					4.86		2.49
748	T Cell Receptor Signaling		ipa	rna	ipa		10.2		6.21					5.2		3.04
749	T cell receptor signaling pathway	path:hsa04660	KEGG	metab	TOPO			5.31605		5.31605
750	T Helper Cell Differentiation		ipa	rna	ipa		12.2		3.1
751	Taurine and Hypotaurine Metabolism	SMP0000021	SMPDB	metab	MSEA	1.68613		2.66959
752	Tec Kinase Signaling		ipa	prot	ipa				1.54
752	Tec Kinase Signaling		ipa	rna	ipa		10.4		6.4					4.41
753	Telomerase Signaling		ipa	rna	ipa							1.97		2.94		1.84
754	Telomere Extension by Telomerase		ipa	rna	ipa							1.62		1.59		1.77
755	Tenoxicam Action Pathway	SMP00706	SMPDB	lipid	ORA	2.05159		1.89963		1.7122
756	Tetrahydrofolate Salvage from 5,10-methenyltetrahydrofolate		ipa	prot	ipa	1.48
757	TGF-beta signaling pathway	path:hsa04350	KEGG	metab	TOPO			2.63451		1.75203
758	TGF-β Signaling		ipa	rna	ipa							2.34				2.01
759	Th1 and Th2 Activation Pathway		ipa	rna	ipa		23.5		7.55	1.69				6.27		1.64
759	Th1 and Th2 Activation Pathway		ipa	prot	ipa				1.57
760	Th1 and Th2 cell differentiation	path:hsa04658	KEGG	metab	TOPO			5.31605		5.31605
761	Th1 Pathway		ipa	prot	ipa				1.61
761	Th1 Pathway		ipa	rna	ipa		21.8		6.77					3.61
762	Th17 Activation Pathway		ipa	rna	ipa		2							1.63
763	Th17 cell differentiation	path:hsa04659	KEGG	metab	TOPO			3.44733		4.96658
764	Th2 Pathway		ipa	rna	ipa		21.5		6.23	1.96				6.41		1.45
764	Th2 Pathway		ipa	prot	ipa				2.21
765	The canonical retinoid cycle in rods (twilight vision)	R-HSA-2453902	Reactome	lipid	ORA					2.59346
766	The Visual Cycle		ipa	rna	ipa										1.65
767	the visual cycle I (vertebrates)	PWY-6861	HUMCYC	lipid	ORA					2.12321
768	Thiosulfate Disproportionation III (Rhodanese)		ipa	rna	ipa								1.5		1.43		1.52
769	Threonine Degradation II		ipa	prot	ipa			1.68
769	Threonine Degradation II		ipa	rna	ipa	1.51
770	Thrombin Signaling		ipa	prot	ipa				2.52
770	Thrombin Signaling		ipa	rna	ipa		3.65		2.52					4.26		3.46
771	Thrombopoietin Signaling		ipa	rna	ipa							2.39		3.97		1.78
772	Thymine Degradation		ipa	prot	ipa		1.33
773	Thyroid cancer	path:hsa05216	KEGG	metab	TOPO			1.64975		1.93181
774	Thyroid Cancer Signaling		ipa	rna	ipa		1.84		1.89			2.22		4.45		3.08
775	Thyroid Hormone Metabolism II (via Conjugation and/or Degradation)		ipa	rna	ipa			1.72					1.35
776	Thyroid hormone signaling pathway	path:hsa04919	KEGG	metab	TOPO			3.52578
777	Tiaprofenic Acid Action Pathway	SMP00705	SMPDB	lipid	ORA	2.05159		1.89963		1.7122
778	Tight junction	path:hsa04530	KEGG	metab	TOPO			5.31605		5.31605
779	Tight Junction Signaling		ipa	prot	ipa		1.74		2.01
779	Tight Junction Signaling		ipa	rna	ipa				1.38
780	TNF signaling pathway	path:hsa04668	KEGG	metab	TOPO			5.31605		3.84466
781	TNFR2 Signaling		ipa	rna	ipa									1.79		2.55
782	Toll-like Receptor Signaling		ipa	rna	ipa					1.56				1.35
783	Toll-like receptor signaling pathway	path:hsa04620	KEGG	metab	TOPO			5.31605		5.31605
784	Tolmetin Action Pathway	SMP00704	SMPDB	lipid	ORA	2.05159		1.89963		1.7122
785	TR/RXR Activation		ipa	rna	ipa					1.48		4.07		3.08		2.62
785	TR/RXR Activation		ipa	prot	ipa				1.97
786	Transcriptional misregulation in cancer	path:hsa05202	KEGG	metab	TOPO			2.90658
787	Transcriptional Regulatory Network in Embryonic Stem Cells		ipa	rna	ipa							2.4		2.2		3.48
788	Transfer of Acetyl Groups into Mitochondria	SMP0000466	SMPDB	metab	MSEA	1.90658		3.9431
789	Transport of fatty acids	R-HSA-804914	Reactome	lipid	ORA					3.16494
790	Transport of small molecules	R-HSA-382551	Reactome	lipid	ORA	3.27654		5.15989		5.91364
791	Transport of vitamins, nucleosides, and related molecules	R-HSA-425397	Reactome	lipid	ORA					1.77989
792	TREM1 Signaling		ipa	rna	ipa		8.07		2.5	2.68				2.25
793	Triacylglycerol Biosynthesis		ipa	rna	ipa								3.91		1.99		1.89
794	triacylglycerol degradation	LIPAS-PWY	HUMCYC	lipid	ORA					2.2815
795	Triglyceride catabolism	R-HSA-163560	Reactome	lipid	ORA			2.92082		2.70997
796	Triglyceride metabolism	R-HSA-8979227	Reactome	lipid	ORA			2.66354		2.45346
797	Trisalicylate-choline Action Pathway	SMP00703	SMPDB	lipid	ORA	2.05159		1.89963		1.7122
798	tRNA Charging		ipa	rna	ipa							1.76
799	tRNA Splicing		ipa	prot	ipa				1.42
799	tRNA Splicing		ipa	rna	ipa		2.71		3.57
800	Tryptophan Degradation III (Eukaryotic)		ipa	rna	ipa										1.37
801	Tryptophan Degradation to 2-amino-3-carboxymuconate Semialdehyde		ipa	rna	ipa		1.88
802	Tryptophan Metabolism	SMP0000063	SMPDB	metab	MSEA	3.06098
803	Tumor Microenvironment Pathway		ipa	rna	ipa		9.53	1.77	1.97	1.66				4.17		2.21
803	Tumor Microenvironment Pathway		ipa	prot	ipa				1.87
804	Tumoricidal Function of Hepatic Natural Killer Cells		ipa	rna	ipa		2.29
805	TWEAK Signaling		ipa	rna	ipa						1.33					1.89
806	Type I Diabetes Mellitus Signaling		ipa	rna	ipa		4.56		1.47
807	Type II Diabetes Mellitus Signaling		ipa	rna	ipa		1.37					3.04		3.97		3.9
808	Tyrosine Degradation I		ipa	rna	ipa										1.89		2.03
809	Tyrosine Metabolism	SMP0000006	SMPDB	metab	MSEA	2.12321
810	Ubiquinone Biosynthesis	SMP0000065	SMPDB	metab	MSEA	3.58336
811	Ubiquitin mediated proteolysis	path:hsa04120	KEGG	metab	TOPO			4.56703		3.36051
812	UDP-N-acetyl-D-glucosamine Biosynthesis II		ipa	prot	ipa	1.4
813	Uracil Degradation II (Reductive)		ipa	prot	ipa		1.33
814	Uridine-5'-phosphate Biosynthesis		ipa	rna	ipa							1.58		1.34		1.41
815	UVA-Induced MAPK Signaling		ipa	rna	ipa							2.85		5.39		3.77
816	UVB-Induced MAPK Signaling		ipa	rna	ipa							3.04		4.22		2.84
817	Valdecoxib Action Pathway	SMP00116	SMPDB	lipid	ORA	2.05159		1.89963		1.7122
818	Valine, leucine and isoleucine degradation	path:hsa00280	KEGG	metab	TOPO	5.27654
819	Vasopressin-regulated water reabsorption	path:hsa04962	KEGG	metab	TOPO			5.31605
820	VDR/RXR Activation		ipa	rna	ipa		1.55					1.39		1.72
821	VEGF Family Ligand-Receptor Interactions		ipa	rna	ipa		3.64			2.54		1.35		3.44		2.62
822	VEGF Signaling		ipa	rna	ipa		2.34			2.34		2.78		3.34		1.58
823	VEGF signaling pathway	path:hsa04370	KEGG	metab	TOPO			2.18243		2.43652
824	Vesicle-mediated transport	R-HSA-5653656	Reactome	lipid	ORA	3.64975		3.39469		3.09366
825	Vibrio cholerae infection	path:hsa05110	KEGG	metab	TOPO			3.80134		3.51999
826	Viral carcinogenesis	path:hsa05203	KEGG	metab	TOPO			2.44855		1.92445
827	Viral myocarditis	path:hsa05416	KEGG	metab	TOPO			5.31605		5.31605
828	Viral protein interaction with cytokine and cytokine receptor	path:hsa04061	KEGG	metab	TOPO			5.31605		5.31605
829	Virus Entry via Endocytic Pathways		ipa	prot	ipa				2.02
829	Virus Entry via Endocytic Pathways		ipa	rna	ipa		2.2					1.46	1.38	2.74
830	Visual phototransduction	R-HSA-2187338	Reactome	lipid	ORA			3.47237		4.51286
831	Warburg Effect	SMP0000654	SMPDB	metab	MSEA	1.90658		3.9431
832	White Adipose Tissue Browning Pathway		ipa	rna	ipa		2.72		4.18					3.23		4.03
833	Wnt/Ca+ pathway		ipa	rna	ipa				1.43			2.1		3.67		2.94
834	Wnt/β-catenin Signaling		ipa	rna	ipa		1.97	4.21	2.68	1.68		4.09		2.78		1.94
834	Wnt/β-catenin Signaling		ipa	prot	ipa		1.68
835	Xenobiotic Metabolism AHR Signaling Pathway		ipa	prot	ipa	1.71	1.33	1.92
835	Xenobiotic Metabolism AHR Signaling Pathway		ipa	rna	ipa	1.37		1.41							1.77		1.57
836	Xenobiotic Metabolism CAR Signaling Pathway		ipa	prot	ipa	1.41		1.84
836	Xenobiotic Metabolism CAR Signaling Pathway		ipa	rna	ipa			3.24
837	Xenobiotic Metabolism General Signaling Pathway		ipa	rna	ipa									1.42		1.53
838	Xenobiotic Metabolism PXR Signaling Pathway		ipa	prot	ipa		1.46	1.8
838	Xenobiotic Metabolism PXR Signaling Pathway		ipa	rna	ipa			2.07
839	Xenobiotic Metabolism Signaling		ipa	prot	ipa			1.5
839	Xenobiotic Metabolism Signaling		ipa	rna	ipa			2.87
840	Yersinia infection	path:hsa05135	KEGG	metab	TOPO			5.31605		5.31605
841	Zymosterol Biosynthesis		ipa	prot	ipa	1.4
842	α-Adrenergic Signaling		ipa	prot	ipa				3.38
842	α-Adrenergic Signaling		ipa	rna	ipa		3.36		2.01					1.87
